# Supplementary material for: Long ascending propriospinal neurons provide flexible, context-specific control of interlimb coordination
Source: eLife. 2020 Sep 9;9:e53565. doi: 10.7554/eLife.53565 (PMC7527236; doi:10.7554/eLife.53565)
Supplement: Figure 1—figure supplement 1—source data 1. [file elife-53565-fig1-figsupp1-data1.xlsx]

## Sheet: L1_proj
Animal_ID	total#_ipsiL2-LAPNs	total#_contraL2-LAPNs	total#_L2-LAPNs	total#_L2-LAPNs+L1-proj	total#_ipsiL2-LAPNs+ipsiL1-proj	total#_ipsiL2-LAPNs+contraL1-proj	total#_contraL2-LAPNs+ipsiL1-proj	total#_contraL2-LAPNs+contraL1-proj
17	135	168	303	58	22	9	12	15
18	119	130	249	34	14	2	5	13
19	165	168	333	60	24	7	15	14
20	121	147	268	51	25	5	16	5
21	138	164	302	46	30	0	10	6
22	157	189	346	43	25	2	4	12

## Sheet: L5_proj
Animal_ID	total#_ipsiL2-LAPNs	total#_contraL2-LAPNs	total#_L2-LAPNs	total#_L2-LAPNs+L5-proj	total#_ipsiL2-LAPNs+ipsiL5-proj	total#_ipsiL2-LAPNs+contraL5-proj	total#_contraL2-LAPNs+ipsiL5-proj	total#_contraL2-LAPNs+contraL5-proj
23	99	155	254	26	11	2	5	8
24	115	157	272	23	3	1	6	13
26	146	183	329	32	16	1	3	12
27	120	181	301	26	8	2	7	9
28	92	155	247	19	6	0	4	9
