# Supplementary material for: Long ascending propriospinal neurons provide flexible, context-specific control of interlimb coordination
Source: eLife. 2020 Sep 9;9:e53565. doi: 10.7554/eLife.53565 (PMC7527236; doi:10.7554/eLife.53565)
Supplement: Figure 2—source data 1. [file elife-53565-fig2-data1.xlsx]

## Sheet: TimePtData
Time_ID	Animal_ID	HL:FL
Baseline	1	100
Baseline	2	103.03
Baseline	7	104
Baseline	8	95.8333
Baseline	9	104.545
Baseline	10	100
Baseline	12	97.4359
Baseline	13	100
Baseline	14	105.556
Baseline	15	100
Baseline	16	100
Baseline	17	103.125
Baseline	18	100
PreDox1	1	100
PreDox1	2	100
PreDox1	7	100
PreDox1	8	105.263
PreDox1	9	100
PreDox1	10	100
PreDox1	12	100
PreDox1	13	105.882
PreDox1	14	100
PreDox1	15	100
PreDox1	16	102.439
PreDox1	17	102.941
PreDox1	18	100
Dox1Day3	1	100
Dox1Day3	2	100
Dox1Day3	7	100
Dox1Day3	8	100
Dox1Day3	9	103.03
Dox1Day3	10	102.439
Dox1Day3	12	100
Dox1Day3	13	100
Dox1Day3	14	100
Dox1Day3	15	96.9697
Dox1Day3	16	100
Dox1Day3	17	100
Dox1Day3	18	102.222
Dox1Day5	1	100
Dox1Day5	2	100
Dox1Day5	7	100
Dox1Day5	8	100
Dox1Day5	9	92.8571
Dox1Day5	10	100
Dox1Day5	12	100
Dox1Day5	13	96.4286
Dox1Day5	14	103.125
Dox1Day5	15	105.882
Dox1Day5	16	100
Dox1Day5	17	106.452
Dox1Day5	18	103.125
Dox1Day8	1	97.5
Dox1Day8	2	100
Dox1Day8	7	100
Dox1Day8	8	97.5
Dox1Day8	9	102.941
Dox1Day8	10	105.405
Dox1Day8	12	97.5
Dox1Day8	13	102.632
Dox1Day8	14	102.5
Dox1Day8	15	103.226
Dox1Day8	16	103.448
Dox1Day8	17	100
Dox1Day8	18	100
DoxOff	1	100
DoxOff	2	97.2222
DoxOff	7	100
DoxOff	8	100
DoxOff	9	100
DoxOff	10	100
DoxOff	12	100
DoxOff	13	100
DoxOff	14	96
DoxOff	15	97.1429
DoxOff	16	96.6667
DoxOff	17	100
DoxOff	18	100
PreDox2	1	100
PreDox2	2	102.632
PreDox2	7	103.448
PreDox2	8	105.882
PreDox2	9	100
PreDox2	10	104.348
PreDox2	12	100
PreDox2	13	102.381
PreDox2	14	100
PreDox2	15	100
PreDox2	16	104.878
PreDox2	17	98
PreDox2	18	102.041
Dox2Day3	1	102.941
Dox2Day3	2	100
Dox2Day3	7	100
Dox2Day3	8	100
Dox2Day3	9	95.3488
Dox2Day3	10	96.4912
Dox2Day3	12	102.5
Dox2Day3	13	100
Dox2Day3	14	102.083
Dox2Day3	15	106.061
Dox2Day3	16	100
Dox2Day3	17	100
Dox2Day3	18	100
Dox2Day5	1	96.7742
Dox2Day5	2	91.6667
Dox2Day5	7	100
Dox2Day5	8	100
Dox2Day5	9	103.03
Dox2Day5	10	109.091
Dox2Day5	12	106
Dox2Day5	13	97.7273
Dox2Day5	14	102.439
Dox2Day5	15	102.5
Dox2Day5	16	109.677
Dox2Day5	17	95.4545
Dox2Day5	18	104.444

## Sheet: AvgData
Animal_ID	Con_avgHL:FL	Dox_avgHL:FL
1	100	99.4431
2	100.721	98.3333
7	101.862	100
8	101.745	99.5
9	101.136	99.4416
10	101.087	102.685
12	99.359	101.2
13	102.066	99.3575
14	100.389	102.029
15	99.2857	102.928
16	100.996	102.625
17	101.017	100.381
18	100.51	101.958
