# Supplementary material for: Long ascending propriospinal neurons provide flexible, context-specific control of interlimb coordination
Source: eLife. 2020 Sep 9;9:e53565. doi: 10.7554/eLife.53565 (PMC7527236; doi:10.7554/eLife.53565)
Supplement: Figure 2—source data 2. [file elife-53565-fig2-data2.xlsx]

## Sheet: RawCounts
Time_ID	Animal_ID	Limb_pair	#Steps_<=conThreshCoord	#Steps_>conThreshCoord
Baseline	1	L-R_forelimbs	10	0
Baseline	2	L-R_forelimbs	9	0
Baseline	7	L-R_forelimbs	7	0
Baseline	8	L-R_forelimbs	5	0
Baseline	9	L-R_forelimbs	8	0
Baseline	10	L-R_forelimbs	7	0
Baseline	12	L-R_forelimbs	12	0
Baseline	13	L-R_forelimbs	12	0
Baseline	14	L-R_forelimbs	10	0
Baseline	15	L-R_forelimbs	9	0
Baseline	16	L-R_forelimbs	11	0
Baseline	17	L-R_forelimbs	9	0
Baseline	18	L-R_forelimbs	10	1
PreDox1	1	L-R_forelimbs	6	0
PreDox1	2	L-R_forelimbs	6	0
PreDox1	7	L-R_forelimbs	9	2
PreDox1	8	L-R_forelimbs	5	0
PreDox1	9	L-R_forelimbs	7	0
PreDox1	10	L-R_forelimbs	11	0
PreDox1	12	L-R_forelimbs	11	1
PreDox1	13	L-R_forelimbs	7	2
PreDox1	14	L-R_forelimbs	7	1
PreDox1	15	L-R_forelimbs	8	1
PreDox1	16	L-R_forelimbs	11	1
PreDox1	17	L-R_forelimbs	11	1
PreDox1	18	L-R_forelimbs	11	1
Dox1Day3	1	L-R_forelimbs	7	0
Dox1Day3	2	L-R_forelimbs	10	0
Dox1Day3	7	L-R_forelimbs	9	1
Dox1Day3	8	L-R_forelimbs	10	1
Dox1Day3	9	L-R_forelimbs	10	0
Dox1Day3	10	L-R_forelimbs	10	2
Dox1Day3	12	L-R_forelimbs	5	1
Dox1Day3	13	L-R_forelimbs	6	3
Dox1Day3	14	L-R_forelimbs	9	0
Dox1Day3	15	L-R_forelimbs	5	4
Dox1Day3	16	L-R_forelimbs	6	3
Dox1Day3	17	L-R_forelimbs	4	2
Dox1Day3	18	L-R_forelimbs	11	1
Dox1Day5	1	L-R_forelimbs	9	1
Dox1Day5	2	L-R_forelimbs	7	2
Dox1Day5	7	L-R_forelimbs	7	4
Dox1Day5	8	L-R_forelimbs	9	1
Dox1Day5	9	L-R_forelimbs	5	5
Dox1Day5	10	L-R_forelimbs	6	4
Dox1Day5	12	L-R_forelimbs	9	0
Dox1Day5	13	L-R_forelimbs	6	0
Dox1Day5	14	L-R_forelimbs	9	2
Dox1Day5	15	L-R_forelimbs	4	5
Dox1Day5	16	L-R_forelimbs	3	2
Dox1Day5	17	L-R_forelimbs	8	1
Dox1Day5	18	L-R_forelimbs	9	2
Dox1Day8	1	L-R_forelimbs	8	3
Dox1Day8	2	L-R_forelimbs	8	1
Dox1Day8	7	L-R_forelimbs	10	0
Dox1Day8	8	L-R_forelimbs	9	0
Dox1Day8	9	L-R_forelimbs	4	5
Dox1Day8	10	L-R_forelimbs	4	5
Dox1Day8	12	L-R_forelimbs	10	1
Dox1Day8	13	L-R_forelimbs	8	0
Dox1Day8	14	L-R_forelimbs	8	2
Dox1Day8	15	L-R_forelimbs	5	4
Dox1Day8	16	L-R_forelimbs	7	1
Dox1Day8	17	L-R_forelimbs	10	0
Dox1Day8	18	L-R_forelimbs	5	2
DoxOff	1	L-R_forelimbs	10	1
DoxOff	2	L-R_forelimbs	9	2
DoxOff	7	L-R_forelimbs	10	0
DoxOff	8	L-R_forelimbs	8	1
DoxOff	9	L-R_forelimbs	9	0
DoxOff	10	L-R_forelimbs	9	1
DoxOff	12	L-R_forelimbs	7	1
DoxOff	13	L-R_forelimbs	6	0
DoxOff	14	L-R_forelimbs	6	0
DoxOff	15	L-R_forelimbs	10	0
DoxOff	16	L-R_forelimbs	9	1
DoxOff	17	L-R_forelimbs	9	0
DoxOff	18	L-R_forelimbs	10	1
SugarCon	1	L-R_forelimbs	(n/a)	(n/a)
SugarCon	2	L-R_forelimbs	(n/a)	(n/a)
SugarCon	7	L-R_forelimbs	(n/a)	(n/a)
SugarCon	8	L-R_forelimbs	(n/a)	(n/a)
SugarCon	9	L-R_forelimbs	(n/a)	(n/a)
SugarCon	10	L-R_forelimbs	(n/a)	(n/a)
SugarCon	12	L-R_forelimbs	6	0
SugarCon	13	L-R_forelimbs	5	1
SugarCon	14	L-R_forelimbs	8	0
SugarCon	15	L-R_forelimbs	9	0
SugarCon	16	L-R_forelimbs	7	0
SugarCon	17	L-R_forelimbs	6	0
SugarCon	18	L-R_forelimbs	7	1
PreDox2	1	L-R_forelimbs	7	0
PreDox2	2	L-R_forelimbs	10	0
PreDox2	7	L-R_forelimbs	7	2
PreDox2	8	L-R_forelimbs	8	0
PreDox2	9	L-R_forelimbs	5	3
PreDox2	10	L-R_forelimbs	5	0
PreDox2	12	L-R_forelimbs	8	0
PreDox2	13	L-R_forelimbs	9	1
PreDox2	14	L-R_forelimbs	7	1
PreDox2	15	L-R_forelimbs	11	0
PreDox2	16	L-R_forelimbs	12	0
PreDox2	17	L-R_forelimbs	10	0
PreDox2	18	L-R_forelimbs	14	0
Dox2Day3	1	L-R_forelimbs	8	0
Dox2Day3	2	L-R_forelimbs	8	0
Dox2Day3	7	L-R_forelimbs	8	2
Dox2Day3	8	L-R_forelimbs	8	1
Dox2Day3	9	L-R_forelimbs	6	4
Dox2Day3	10	L-R_forelimbs	2	9
Dox2Day3	12	L-R_forelimbs	6	2
Dox2Day3	13	L-R_forelimbs	10	0
Dox2Day3	14	L-R_forelimbs	10	0
Dox2Day3	15	L-R_forelimbs	7	1
Dox2Day3	16	L-R_forelimbs	7	2
Dox2Day3	17	L-R_forelimbs	9	0
Dox2Day3	18	L-R_forelimbs	8	2
Dox2Day5	1	L-R_forelimbs	7	1
Dox2Day5	2	L-R_forelimbs	9	0
Dox2Day5	7	L-R_forelimbs	10	0
Dox2Day5	8	L-R_forelimbs	8	0
Dox2Day5	9	L-R_forelimbs	4	6
Dox2Day5	10	L-R_forelimbs	3	6
Dox2Day5	12	L-R_forelimbs	3	7
Dox2Day5	13	L-R_forelimbs	3	7
Dox2Day5	14	L-R_forelimbs	7	3
Dox2Day5	15	L-R_forelimbs	4	6
Dox2Day5	16	L-R_forelimbs	7	0
Dox2Day5	17	L-R_forelimbs	8	2
Dox2Day5	18	L-R_forelimbs	6	3
Baseline	1	L-R_hindlimbs	9	0
Baseline	2	L-R_hindlimbs	10	0
Baseline	7	L-R_hindlimbs	4	3
Baseline	8	L-R_hindlimbs	5	0
Baseline	9	L-R_hindlimbs	7	1
Baseline	10	L-R_hindlimbs	7	0
Baseline	12	L-R_hindlimbs	10	0
Baseline	13	L-R_hindlimbs	10	0
Baseline	14	L-R_hindlimbs	12	0
Baseline	15	L-R_hindlimbs	11	0
Baseline	16	L-R_hindlimbs	10	1
Baseline	17	L-R_hindlimbs	8	0
Baseline	18	L-R_hindlimbs	12	0
PreDox1	1	L-R_hindlimbs	6	0
PreDox1	2	L-R_hindlimbs	7	0
PreDox1	7	L-R_hindlimbs	10	2
PreDox1	8	L-R_hindlimbs	8	0
PreDox1	9	L-R_hindlimbs	7	0
PreDox1	10	L-R_hindlimbs	12	0
PreDox1	12	L-R_hindlimbs	10	0
PreDox1	13	L-R_hindlimbs	8	2
PreDox1	14	L-R_hindlimbs	7	2
PreDox1	15	L-R_hindlimbs	8	1
PreDox1	16	L-R_hindlimbs	7	2
PreDox1	17	L-R_hindlimbs	11	0
PreDox1	18	L-R_hindlimbs	10	0
Dox1Day3	1	L-R_hindlimbs	6	0
Dox1Day3	2	L-R_hindlimbs	9	0
Dox1Day3	7	L-R_hindlimbs	8	0
Dox1Day3	8	L-R_hindlimbs	10	0
Dox1Day3	9	L-R_hindlimbs	10	0
Dox1Day3	10	L-R_hindlimbs	8	5
Dox1Day3	12	L-R_hindlimbs	4	2
Dox1Day3	13	L-R_hindlimbs	7	2
Dox1Day3	14	L-R_hindlimbs	9	1
Dox1Day3	15	L-R_hindlimbs	5	3
Dox1Day3	16	L-R_hindlimbs	4	7
Dox1Day3	17	L-R_hindlimbs	6	2
Dox1Day3	18	L-R_hindlimbs	8	4
Dox1Day5	1	L-R_hindlimbs	10	0
Dox1Day5	2	L-R_hindlimbs	10	0
Dox1Day5	7	L-R_hindlimbs	10	1
Dox1Day5	8	L-R_hindlimbs	9	0
Dox1Day5	9	L-R_hindlimbs	5	5
Dox1Day5	10	L-R_hindlimbs	7	4
Dox1Day5	12	L-R_hindlimbs	6	3
Dox1Day5	13	L-R_hindlimbs	3	3
Dox1Day5	14	L-R_hindlimbs	9	0
Dox1Day5	15	L-R_hindlimbs	3	7
Dox1Day5	16	L-R_hindlimbs	6	2
Dox1Day5	17	L-R_hindlimbs	7	2
Dox1Day5	18	L-R_hindlimbs	6	2
Dox1Day8	1	L-R_hindlimbs	7	3
Dox1Day8	2	L-R_hindlimbs	9	0
Dox1Day8	7	L-R_hindlimbs	8	0
Dox1Day8	8	L-R_hindlimbs	10	0
Dox1Day8	9	L-R_hindlimbs	5	6
Dox1Day8	10	L-R_hindlimbs	2	7
Dox1Day8	12	L-R_hindlimbs	8	2
Dox1Day8	13	L-R_hindlimbs	8	0
Dox1Day8	14	L-R_hindlimbs	5	5
Dox1Day8	15	L-R_hindlimbs	5	7
Dox1Day8	16	L-R_hindlimbs	6	3
Dox1Day8	17	L-R_hindlimbs	8	0
Dox1Day8	18	L-R_hindlimbs	4	2
DoxOff	1	L-R_hindlimbs	11	0
DoxOff	2	L-R_hindlimbs	8	0
DoxOff	7	L-R_hindlimbs	10	0
DoxOff	8	L-R_hindlimbs	8	1
DoxOff	9	L-R_hindlimbs	9	0
DoxOff	10	L-R_hindlimbs	10	0
DoxOff	12	L-R_hindlimbs	7	2
DoxOff	13	L-R_hindlimbs	8	0
DoxOff	14	L-R_hindlimbs	8	0
DoxOff	15	L-R_hindlimbs	7	1
DoxOff	16	L-R_hindlimbs	9	1
DoxOff	17	L-R_hindlimbs	10	0
DoxOff	18	L-R_hindlimbs	9	1
SugarCon	1	L-R_hindlimbs	(n/a)	(n/a)
SugarCon	2	L-R_hindlimbs	(n/a)	(n/a)
SugarCon	7	L-R_hindlimbs	(n/a)	(n/a)
SugarCon	8	L-R_hindlimbs	(n/a)	(n/a)
SugarCon	9	L-R_hindlimbs	(n/a)	(n/a)
SugarCon	10	L-R_hindlimbs	(n/a)	(n/a)
SugarCon	12	L-R_hindlimbs	6	0
SugarCon	13	L-R_hindlimbs	5	1
SugarCon	14	L-R_hindlimbs	8	0
SugarCon	15	L-R_hindlimbs	9	0
SugarCon	16	L-R_hindlimbs	7	0
SugarCon	17	L-R_hindlimbs	6	0
SugarCon	18	L-R_hindlimbs	7	1
PreDox2	1	L-R_hindlimbs	9	0
PreDox2	2	L-R_hindlimbs	10	0
PreDox2	7	L-R_hindlimbs	8	0
PreDox2	8	L-R_hindlimbs	7	1
PreDox2	9	L-R_hindlimbs	6	1
PreDox2	10	L-R_hindlimbs	4	0
PreDox2	12	L-R_hindlimbs	8	1
PreDox2	13	L-R_hindlimbs	12	0
PreDox2	14	L-R_hindlimbs	8	1
PreDox2	15	L-R_hindlimbs	11	0
PreDox2	16	L-R_hindlimbs	8	2
PreDox2	17	L-R_hindlimbs	12	0
PreDox2	18	L-R_hindlimbs	11	0
Dox2Day3	1	L-R_hindlimbs	7	0
Dox2Day3	2	L-R_hindlimbs	8	0
Dox2Day3	7	L-R_hindlimbs	8	2
Dox2Day3	8	L-R_hindlimbs	6	3
Dox2Day3	9	L-R_hindlimbs	4	6
Dox2Day3	10	L-R_hindlimbs	1	9
Dox2Day3	12	L-R_hindlimbs	6	3
Dox2Day3	13	L-R_hindlimbs	10	0
Dox2Day3	14	L-R_hindlimbs	10	0
Dox2Day3	15	L-R_hindlimbs	5	3
Dox2Day3	16	L-R_hindlimbs	8	1
Dox2Day3	17	L-R_hindlimbs	7	2
Dox2Day3	18	L-R_hindlimbs	6	5
Dox2Day5	1	L-R_hindlimbs	8	0
Dox2Day5	2	L-R_hindlimbs	8	0
Dox2Day5	7	L-R_hindlimbs	10	0
Dox2Day5	8	L-R_hindlimbs	4	3
Dox2Day5	9	L-R_hindlimbs	5	5
Dox2Day5	10	L-R_hindlimbs	2	8
Dox2Day5	12	L-R_hindlimbs	2	8
Dox2Day5	13	L-R_hindlimbs	4	6
Dox2Day5	14	L-R_hindlimbs	3	6
Dox2Day5	15	L-R_hindlimbs	2	8
Dox2Day5	16	L-R_hindlimbs	7	2
Dox2Day5	17	L-R_hindlimbs	9	1
Dox2Day5	18	L-R_hindlimbs	3	6
Baseline	1	RHL_homolat	9	0
Baseline	2	RHL_homolat	10	0
Baseline	7	RHL_homolat	7	0
Baseline	8	RHL_homolat	5	0
Baseline	9	RHL_homolat	8	0
Baseline	10	RHL_homolat	5	2
Baseline	12	RHL_homolat	9	1
Baseline	13	RHL_homolat	10	0
Baseline	14	RHL_homolat	12	0
Baseline	15	RHL_homolat	11	0
Baseline	16	RHL_homolat	9	2
Baseline	17	RHL_homolat	8	0
Baseline	18	RHL_homolat	12	0
PreDox1	1	RHL_homolat	6	0
PreDox1	2	RHL_homolat	7	0
PreDox1	7	RHL_homolat	12	0
PreDox1	8	RHL_homolat	7	1
PreDox1	9	RHL_homolat	7	0
PreDox1	10	RHL_homolat	12	0
PreDox1	12	RHL_homolat	10	0
PreDox1	13	RHL_homolat	10	0
PreDox1	14	RHL_homolat	8	1
PreDox1	15	RHL_homolat	9	0
PreDox1	16	RHL_homolat	8	1
PreDox1	17	RHL_homolat	11	0
PreDox1	18	RHL_homolat	9	1
Dox1Day3	1	RHL_homolat	6	0
Dox1Day3	2	RHL_homolat	9	0
Dox1Day3	7	RHL_homolat	7	1
Dox1Day3	8	RHL_homolat	10	0
Dox1Day3	9	RHL_homolat	9	1
Dox1Day3	10	RHL_homolat	13	0
Dox1Day3	12	RHL_homolat	5	1
Dox1Day3	13	RHL_homolat	9	0
Dox1Day3	14	RHL_homolat	10	0
Dox1Day3	15	RHL_homolat	8	0
Dox1Day3	16	RHL_homolat	11	0
Dox1Day3	17	RHL_homolat	8	0
Dox1Day3	18	RHL_homolat	10	2
Dox1Day5	1	RHL_homolat	8	2
Dox1Day5	2	RHL_homolat	10	0
Dox1Day5	7	RHL_homolat	11	0
Dox1Day5	8	RHL_homolat	9	0
Dox1Day5	9	RHL_homolat	10	0
Dox1Day5	10	RHL_homolat	9	1
Dox1Day5	12	RHL_homolat	9	0
Dox1Day5	13	RHL_homolat	6	0
Dox1Day5	14	RHL_homolat	9	0
Dox1Day5	15	RHL_homolat	8	2
Dox1Day5	16	RHL_homolat	7	0
Dox1Day5	17	RHL_homolat	9	0
Dox1Day5	18	RHL_homolat	10	0
Dox1Day8	1	RHL_homolat	9	0
Dox1Day8	2	RHL_homolat	9	0
Dox1Day8	7	RHL_homolat	8	0
Dox1Day8	8	RHL_homolat	10	0
Dox1Day8	9	RHL_homolat	10	0
Dox1Day8	10	RHL_homolat	8	1
Dox1Day8	12	RHL_homolat	10	0
Dox1Day8	13	RHL_homolat	7	1
Dox1Day8	14	RHL_homolat	10	0
Dox1Day8	15	RHL_homolat	10	0
Dox1Day8	16	RHL_homolat	8	1
Dox1Day8	17	RHL_homolat	8	0
Dox1Day8	18	RHL_homolat	10	0
DoxOff	1	RHL_homolat	11	0
DoxOff	2	RHL_homolat	8	0
DoxOff	7	RHL_homolat	10	0
DoxOff	8	RHL_homolat	8	1
DoxOff	9	RHL_homolat	9	0
DoxOff	10	RHL_homolat	10	0
DoxOff	12	RHL_homolat	9	0
DoxOff	13	RHL_homolat	7	1
DoxOff	14	RHL_homolat	8	0
DoxOff	15	RHL_homolat	8	0
DoxOff	16	RHL_homolat	9	1
DoxOff	17	RHL_homolat	10	0
DoxOff	18	RHL_homolat	8	2
SugarCon	1	RHL_homolat	(n/a)	(n/a)
SugarCon	2	RHL_homolat	(n/a)	(n/a)
SugarCon	7	RHL_homolat	(n/a)	(n/a)
SugarCon	8	RHL_homolat	(n/a)	(n/a)
SugarCon	9	RHL_homolat	(n/a)	(n/a)
SugarCon	10	RHL_homolat	(n/a)	(n/a)
SugarCon	12	RHL_homolat	6	0
SugarCon	13	RHL_homolat	6	0
SugarCon	14	RHL_homolat	8	0
SugarCon	15	RHL_homolat	9	0
SugarCon	16	RHL_homolat	7	0
SugarCon	17	RHL_homolat	6	0
SugarCon	18	RHL_homolat	8	0
PreDox2	1	RHL_homolat	9	0
PreDox2	2	RHL_homolat	10	0
PreDox2	7	RHL_homolat	8	0
PreDox2	8	RHL_homolat	8	0
PreDox2	9	RHL_homolat	6	1
PreDox2	10	RHL_homolat	4	0
PreDox2	12	RHL_homolat	9	0
PreDox2	13	RHL_homolat	12	0
PreDox2	14	RHL_homolat	9	0
PreDox2	15	RHL_homolat	10	1
PreDox2	16	RHL_homolat	8	2
PreDox2	17	RHL_homolat	12	0
PreDox2	18	RHL_homolat	10	1
Dox2Day3	1	RHL_homolat	6	1
Dox2Day3	2	RHL_homolat	8	0
Dox2Day3	7	RHL_homolat	10	0
Dox2Day3	8	RHL_homolat	9	0
Dox2Day3	9	RHL_homolat	10	0
Dox2Day3	10	RHL_homolat	10	0
Dox2Day3	12	RHL_homolat	8	1
Dox2Day3	13	RHL_homolat	10	0
Dox2Day3	14	RHL_homolat	10	0
Dox2Day3	15	RHL_homolat	8	0
Dox2Day3	16	RHL_homolat	9	0
Dox2Day3	17	RHL_homolat	8	1
Dox2Day3	18	RHL_homolat	11	0
Dox2Day5	1	RHL_homolat	8	0
Dox2Day5	2	RHL_homolat	8	0
Dox2Day5	7	RHL_homolat	10	0
Dox2Day5	8	RHL_homolat	7	0
Dox2Day5	9	RHL_homolat	10	0
Dox2Day5	10	RHL_homolat	10	0
Dox2Day5	12	RHL_homolat	10	0
Dox2Day5	13	RHL_homolat	10	0
Dox2Day5	14	RHL_homolat	9	0
Dox2Day5	15	RHL_homolat	10	0
Dox2Day5	16	RHL_homolat	8	1
Dox2Day5	17	RHL_homolat	10	0
Dox2Day5	18	RHL_homolat	9	0
Baseline	1	RHL_heterolat	9	0
Baseline	2	RHL_heterolat	10	0
Baseline	7	RHL_heterolat	7	0
Baseline	8	RHL_heterolat	4	1
Baseline	9	RHL_heterolat	8	0
Baseline	10	RHL_heterolat	7	0
Baseline	12	RHL_heterolat	10	0
Baseline	13	RHL_heterolat	10	0
Baseline	14	RHL_heterolat	12	0
Baseline	15	RHL_heterolat	11	0
Baseline	16	RHL_heterolat	10	1
Baseline	17	RHL_heterolat	8	0
Baseline	18	RHL_heterolat	12	0
PreDox1	1	RHL_heterolat	6	0
PreDox1	2	RHL_heterolat	7	0
PreDox1	7	RHL_heterolat	12	0
PreDox1	8	RHL_heterolat	8	0
PreDox1	9	RHL_heterolat	7	0
PreDox1	10	RHL_heterolat	10	2
PreDox1	12	RHL_heterolat	10	0
PreDox1	13	RHL_heterolat	10	0
PreDox1	14	RHL_heterolat	9	0
PreDox1	15	RHL_heterolat	9	0
PreDox1	16	RHL_heterolat	8	1
PreDox1	17	RHL_heterolat	10	1
PreDox1	18	RHL_heterolat	9	1
Dox1Day3	1	RHL_heterolat	6	0
Dox1Day3	2	RHL_heterolat	9	0
Dox1Day3	7	RHL_heterolat	7	1
Dox1Day3	8	RHL_heterolat	10	0
Dox1Day3	9	RHL_heterolat	10	0
Dox1Day3	10	RHL_heterolat	12	1
Dox1Day3	12	RHL_heterolat	6	0
Dox1Day3	13	RHL_heterolat	9	0
Dox1Day3	14	RHL_heterolat	10	0
Dox1Day3	15	RHL_heterolat	5	3
Dox1Day3	16	RHL_heterolat	6	5
Dox1Day3	17	RHL_heterolat	6	2
Dox1Day3	18	RHL_heterolat	10	2
Dox1Day5	1	RHL_heterolat	8	2
Dox1Day5	2	RHL_heterolat	9	1
Dox1Day5	7	RHL_heterolat	11	0
Dox1Day5	8	RHL_heterolat	9	0
Dox1Day5	9	RHL_heterolat	7	3
Dox1Day5	10	RHL_heterolat	6	4
Dox1Day5	12	RHL_heterolat	9	0
Dox1Day5	13	RHL_heterolat	6	0
Dox1Day5	14	RHL_heterolat	8	1
Dox1Day5	15	RHL_heterolat	8	2
Dox1Day5	16	RHL_heterolat	4	3
Dox1Day5	17	RHL_heterolat	7	2
Dox1Day5	18	RHL_heterolat	8	2
Dox1Day8	1	RHL_heterolat	8	2
Dox1Day8	2	RHL_heterolat	9	0
Dox1Day8	7	RHL_heterolat	8	0
Dox1Day8	8	RHL_heterolat	10	0
Dox1Day8	9	RHL_heterolat	6	4
Dox1Day8	10	RHL_heterolat	5	4
Dox1Day8	12	RHL_heterolat	10	0
Dox1Day8	13	RHL_heterolat	8	0
Dox1Day8	14	RHL_heterolat	10	0
Dox1Day8	15	RHL_heterolat	6	4
Dox1Day8	16	RHL_heterolat	9	0
Dox1Day8	17	RHL_heterolat	8	0
Dox1Day8	18	RHL_heterolat	8	1
DoxOff	1	RHL_heterolat	10	1
DoxOff	2	RHL_heterolat	8	0
DoxOff	7	RHL_heterolat	11	0
DoxOff	8	RHL_heterolat	8	1
DoxOff	9	RHL_heterolat	9	0
DoxOff	10	RHL_heterolat	10	0
DoxOff	12	RHL_heterolat	9	0
DoxOff	13	RHL_heterolat	8	0
DoxOff	14	RHL_heterolat	8	0
DoxOff	15	RHL_heterolat	8	0
DoxOff	16	RHL_heterolat	10	0
DoxOff	17	RHL_heterolat	10	0
DoxOff	18	RHL_heterolat	8	1
SugarCon	1	RHL_heterolat	(n/a)	(n/a)
SugarCon	2	RHL_heterolat	(n/a)	(n/a)
SugarCon	7	RHL_heterolat	(n/a)	(n/a)
SugarCon	8	RHL_heterolat	(n/a)	(n/a)
SugarCon	9	RHL_heterolat	(n/a)	(n/a)
SugarCon	10	RHL_heterolat	(n/a)	(n/a)
SugarCon	12	RHL_heterolat	6	0
SugarCon	13	RHL_heterolat	6	0
SugarCon	14	RHL_heterolat	8	0
SugarCon	15	RHL_heterolat	9	0
SugarCon	16	RHL_heterolat	7	0
SugarCon	17	RHL_heterolat	6	0
SugarCon	18	RHL_heterolat	8	0
PreDox2	1	RHL_heterolat	9	0
PreDox2	2	RHL_heterolat	10	0
PreDox2	7	RHL_heterolat	8	0
PreDox2	8	RHL_heterolat	8	0
PreDox2	9	RHL_heterolat	6	1
PreDox2	10	RHL_heterolat	4	0
PreDox2	12	RHL_heterolat	9	0
PreDox2	13	RHL_heterolat	12	0
PreDox2	14	RHL_heterolat	9	0
PreDox2	15	RHL_heterolat	9	2
PreDox2	16	RHL_heterolat	7	3
PreDox2	17	RHL_heterolat	12	0
PreDox2	18	RHL_heterolat	10	1
Dox2Day3	1	RHL_heterolat	7	1
Dox2Day3	2	RHL_heterolat	8	0
Dox2Day3	7	RHL_heterolat	8	2
Dox2Day3	8	RHL_heterolat	9	0
Dox2Day3	9	RHL_heterolat	8	2
Dox2Day3	10	RHL_heterolat	6	4
Dox2Day3	12	RHL_heterolat	8	1
Dox2Day3	13	RHL_heterolat	10	0
Dox2Day3	14	RHL_heterolat	10	0
Dox2Day3	15	RHL_heterolat	6	2
Dox2Day3	16	RHL_heterolat	7	2
Dox2Day3	17	RHL_heterolat	9	0
Dox2Day3	18	RHL_heterolat	10	0
Dox2Day5	1	RHL_heterolat	8	0
Dox2Day5	2	RHL_heterolat	8	0
Dox2Day5	7	RHL_heterolat	10	0
Dox2Day5	8	RHL_heterolat	7	0
Dox2Day5	9	RHL_heterolat	6	4
Dox2Day5	10	RHL_heterolat	4	6
Dox2Day5	12	RHL_heterolat	8	2
Dox2Day5	13	RHL_heterolat	4	6
Dox2Day5	14	RHL_heterolat	6	3
Dox2Day5	15	RHL_heterolat	4	6
Dox2Day5	16	RHL_heterolat	7	2
Dox2Day5	17	RHL_heterolat	9	1
Dox2Day5	18	RHL_heterolat	3	5

## Sheet: AvgData
Animal_ID	%total_>conThreshCoord@Dox_HL-FL	%total_>conThreshCoord@Dox_L-R
1	50	50
2	25	75
7	28.5714	71.4286
8	0	100
9	25	75
10	26.25	73.75
12	14.7059	85.2941
13	25	75
14	17.3913	82.6087
15	28.3582	71.6418
16	37.8378	62.1622
17	33.3333	66.6667
18	29.2683	70.7317
