# Supplementary material for: Long ascending propriospinal neurons provide flexible, context-specific control of interlimb coordination
Source: eLife. 2020 Sep 9;9:e53565. doi: 10.7554/eLife.53565 (PMC7527236; doi:10.7554/eLife.53565)
Supplement: Figure 2—source data 3. [file elife-53565-fig2-data3.xlsx]

## Sheet: L-R_forelimbs
Animal_ID	Baseline_rawPhase	Baseline_transPhase		Animal_ID	PreDox1_rawPhase	PreDox1_transPhase		Animal_ID	Dox1Day3_rawPhase	Dox1Day3_transPhase		Animal_ID	Dox1Day5_rawPhase	Dox1Day5_transPhase		Animal_ID	Dox1Day8_rawPhase	Dox1Day8_transPhase		Animal_ID	DoxOff_rawPhase	DoxOff_transPhase		Animal_ID	SugarCon_rawPhase	SugarCon_transPhase		Animal_ID	PreDox2_rawPhase	PreDox2_transPhase		Animal_ID	Dox2Day3_rawPhase	Dox2Day3_transPhase		Animal_ID	Dox2Day5_rawPhase	Dox2Day5_transPhase
1	0.470588	0.529412		1	0.484848	0.515152		1	0.5	0.5		1	0.515152	0.515152		1	0.941176	0.941176		1	0.4375	0.5625		12	0.52	0.52		1	0.484848	0.515152		1	0.5	0.5		1	0.5	0.5
1	0.485714	0.514286		1	0.454545	0.545455		1	0.5	0.5		1	0.551724	0.551724		1	0.9375	0.9375		1	0.527778	0.527778		12	0.5	0.5		1	0.533333	0.533333		1	0.580645	0.580645		1	0.487179	0.512821
1	0.529412	0.529412		1	0.605263	0.605263		1	0.448276	0.551724		1	0.483871	0.516129		1	0	1		1	0.481481	0.518519		12	0.466667	0.533333		1	0.515152	0.515152		1	0.410256	0.589744		1	0.517241	0.517241
1	0.5	0.5		1	0.535714	0.535714		1	0.516129	0.516129		1	0.551724	0.551724		1	0.441176	0.558824		1	0.466667	0.533333		12	0.483871	0.516129		1	0.5	0.5		1	0.560976	0.560976		1	0.461538	0.538462
1	0.425	0.575		1	0.516129	0.516129		1	0.482759	0.517241		1	0.53125	0.53125		1	0.424242	0.575758		1	0.457143	0.542857		12	0.464286	0.535714		1	0.441176	0.558824		1	0.484848	0.515152		1	0.5	0.5
1	0.516129	0.516129		1	0.5	0.5		1	0.5	0.5		1	0.606061	0.606061		1	0.567568	0.567568		1	0.641026	0.641026		13	0.607143	0.607143		1	0.533333	0.533333		1	0.548387	0.548387		1	0.645161	0.645161
1	0.428571	0.571429		2	0.470588	0.529412		1	0.533333	0.533333		1	0.529412	0.529412		1	0.512821	0.512821		1	0.53125	0.53125		13	0.538462	0.538462		1	0.475	0.525		1	0.470588	0.529412		1	0.48	0.52
1	0.481481	0.518519		2	0.484848	0.515152		2	0.483871	0.516129		1	0.548387	0.548387		1	0.595238	0.595238		1	0.470588	0.529412		13	0.538462	0.538462		2	0.444444	0.555556		1	0.5	0.5		1	0.517241	0.517241
1	0.571429	0.571429		2	0.45	0.55		2	0.5	0.5		1	0.586207	0.586207		1	0.581395	0.581395		1	0.521739	0.521739		13	0.529412	0.529412		2	0.518519	0.518519		2	0.5	0.5		2	0.466667	0.533333
1	0.482759	0.517241		2	0.513514	0.513514		2	0.580645	0.580645		1	0.62963	0.62963		1	0.44186	0.55814		1	0.525	0.525		13	0.612903	0.612903		2	0.52	0.52		2	0.516129	0.516129		2	0.535714	0.535714
2	0.515152	0.515152		2	0.482759	0.517241		2	0.571429	0.571429		2	0.516129	0.516129		1	0.568182	0.568182		1	0.5	0.5		14	0.448276	0.551724		2	0.470588	0.529412		2	0.518519	0.518519		2	0.409091	0.590909
2	0.470588	0.529412		2	0.535714	0.535714		2	0.481481	0.518519		2	0.595238	0.595238		2	0.461538	0.538462		1	0.466667	0.533333		14	0.535714	0.535714		2	0.547619	0.547619		2	0.551724	0.551724		2	0.5	0.5
2	0.515152	0.515152		7	0.542857	0.542857		2	0.5	0.5		2	0.5	0.5		2	0.388889	0.611111		2	0.5	0.5		14	0.517241	0.517241		2	0.527778	0.527778		2	0.448276	0.551724		2	0.529412	0.529412
2	0.482759	0.517241		7	0.482759	0.517241		2	0.5	0.5		2	0.578947	0.578947		2	0.52	0.52		2	0.407407	0.592593		14	0.5	0.5		2	0.5	0.5		2	0.588235	0.588235		2	0.5	0.5
2	0.466667	0.533333		7	0.560976	0.560976		2	0.541667	0.541667		2	0.525	0.525		2	0.461538	0.538462		2	0.5	0.5		14	0.533333	0.533333		2	0.482759	0.517241		2	0.513514	0.513514		2	0.538462	0.538462
2	0.538462	0.538462		7	0.64	0.64		2	0.464286	0.535714		2	0.633333	0.633333		2	0.517241	0.517241		2	0.433333	0.566667		14	0.461538	0.538462		2	0.485714	0.514286		2	0.551724	0.551724		2	0.48	0.52
2	0.44	0.56		7	0.56	0.56		2	0.52	0.52		2	0.5	0.5		2	0.590909	0.590909		2	0.342105	0.657895		14	0.416667	0.583333		2	0.5	0.5		7	0.485714	0.514286		2	0.538462	0.538462
2	0.5	0.5		7	0.518519	0.518519		7	0.451613	0.548387		2	0.380952	0.619048		2	0.5	0.5		2	0.481481	0.518519		14	0.46875	0.53125		7	0.527778	0.527778		7	0.59375	0.59375		7	0.555556	0.555556
2	0.4375	0.5625		7	0.517241	0.517241		7	0.5	0.5		2	0.560976	0.560976		2	0.6	0.6		2	0.428571	0.571429		15	0.461538	0.538462		7	0.481481	0.518519		7	0.586207	0.586207		7	0.555556	0.555556
7	0.485714	0.514286		7	0.555556	0.555556		7	0.4	0.6		7	0.548387	0.548387		2	0.5	0.5		2	0.347826	0.652174		15	0.481481	0.518519		7	0.566667	0.566667		7	0.636364	0.636364		7	0.555556	0.555556
7	0.517241	0.517241		7	0.535714	0.535714		7	0.483871	0.516129		7	0.517241	0.517241		7	0.466667	0.533333		2	0.517241	0.517241		15	0.533333	0.533333		7	0.542857	0.542857		7	0.459459	0.540541		7	0.53125	0.53125
7	0.576923	0.576923		7	0.387097	0.612903		7	0.592593	0.592593		7	0.628571	0.628571		7	0.516129	0.516129		2	0.482759	0.517241		15	0.458333	0.541667		7	0.487179	0.512821		7	0.483871	0.516129		7	0.518519	0.518519
7	0.545455	0.545455		7	0.5	0.5		7	0.56	0.56		7	0.355556	0.644444		7	0.422222	0.577778		2	0.458333	0.541667		15	0.583333	0.583333		7	0.638298	0.638298		7	0.555556	0.555556		7	0.56	0.56
7	0.545455	0.545455		8	0.405405	0.594595		7	0.515152	0.515152		7	0.457143	0.542857		7	0.536585	0.536585		7	0.514286	0.514286		15	0.424242	0.575758		7	0.518519	0.518519		7	0.565217	0.565217		7	0.535714	0.535714
7	0.541667	0.541667		8	0.606061	0.606061		7	0.583333	0.583333		7	0.465116	0.534884		7	0.571429	0.571429		7	0.522727	0.522727		15	0.583333	0.583333		7	0.612903	0.612903		7	0.6	0.6		7	0.56	0.56
7	0.4	0.6		8	0.5	0.5		7	0.741935	0.741935		7	0.487179	0.512821		7	0.578947	0.578947		7	0.520833	0.520833		15	0.592593	0.592593		7	0.518519	0.518519		7	0.619048	0.619048		7	0.590909	0.590909
8	0.533333	0.533333		8	0.555556	0.555556		7	0.513514	0.513514		7	0.424242	0.575758		7	0.607143	0.607143		7	0.431034	0.568966		15	0.454545	0.545455		8	0.393939	0.606061		8	0.448276	0.551724		7	0.592593	0.592593
8	0.566667	0.566667		8	0.5	0.5		8	0.515152	0.515152		7	0.515152	0.515152		7	0.564103	0.564103		7	0.568627	0.568627		15	0.481481	0.518519		8	0.555556	0.555556		8	0.518519	0.518519		8	0.535714	0.535714
8	0.444444	0.555556		9	0.481481	0.518519		8	0.428571	0.571429		7	0.62963	0.62963		7	0.594595	0.594595		7	0.59375	0.59375		15	0.541667	0.541667		8	0.521739	0.521739		8	0.541667	0.541667		8	0.555556	0.555556
8	0.6	0.6		9	0.535714	0.535714		8	0.535714	0.535714		7	0.615385	0.615385		7	0.551724	0.551724		7	0.535714	0.535714		16	0.5	0.5		8	0.555556	0.555556		8	0.481481	0.518519		8	0.52	0.52
8	0.545455	0.545455		9	0.464286	0.535714		8	0.518519	0.518519		8	0.517241	0.517241		8	0.457143	0.542857		7	0.52381	0.52381		16	0.52	0.52		8	0.571429	0.571429		8	0.529412	0.529412		8	0.521739	0.521739
9	0.411765	0.588235		9	0.516129	0.516129		8	0.46875	0.53125		8	0.461538	0.538462		8	0.541667	0.541667		7	0.487805	0.512195		16	0.482759	0.517241		8	0.4	0.6		8	0.571429	0.571429		8	0.483871	0.516129
9	0.571429	0.571429		9	0.517241	0.517241		8	0.5	0.5		8	0.5	0.5		8	0.6	0.6		7	0.592593	0.592593		16	0.512821	0.512821		8	0.545455	0.545455		8	0.576923	0.576923		8	0.52	0.52
9	0.586207	0.586207		9	0.481481	0.518519		8	0.388889	0.611111		8	0.551724	0.551724		8	0.575758	0.575758		8	0.466667	0.533333		16	0.52	0.52		8	0.516129	0.516129		8	0.608696	0.608696		8	0.535714	0.535714
9	0.576923	0.576923		9	0.53125	0.53125		8	0.540541	0.540541		8	0.538462	0.538462		8	0.513514	0.513514		8	0.548387	0.548387		16	0.541667	0.541667		9	0.52	0.52		8	0.583333	0.583333		8	0.5	0.5
9	0.527778	0.527778		10	0.5	0.5		8	0.560976	0.560976		8	0.548387	0.548387		8	0.536585	0.536585		8	0.516129	0.516129		16	0.55	0.55		9	0.5	0.5		9	0.608696	0.608696		9	0.478261	0.521739
9	0.551724	0.551724		10	0.52	0.52		8	0.6	0.6		8	0.631579	0.631579		8	0.538462	0.538462		8	0.5	0.5		17	0.521739	0.521739		9	0.55	0.55		9	0.521739	0.521739		9	0.521739	0.521739
9	0.454545	0.545455		10	0.590909	0.590909		8	0.46875	0.53125		8	0.5	0.5		8	0.515152	0.515152		8	0.5	0.5		17	0.5	0.5		9	0.608696	0.608696		9	0.65	0.65		9	0.933333	0.933333
9	0.5	0.5		10	0.454545	0.545455		9	0.5	0.5		8	0.6	0.6		8	0.517241	0.517241		8	0.657895	0.657895		17	0.5	0.5		9	0.647059	0.647059		9	0.517241	0.517241		9	0.461538	0.538462
10	0.464286	0.535714		10	0.482759	0.517241		9	0.483871	0.516129		8	0.441176	0.558824		9	0.461538	0.538462		8	0.407407	0.592593		17	0.5	0.5		9	0.585366	0.585366		9	0.583333	0.583333		9	0.9375	0.9375
10	0.517241	0.517241		10	0.5	0.5		9	0.425	0.575		9	0.481481	0.518519		9	0.535714	0.535714		8	0.545455	0.545455		17	0.512821	0.512821		9	0.416667	0.583333		9	0.382353	0.617647		9	0.764706	0.764706
10	0.481481	0.518519		10	0.448276	0.551724		9	0.5	0.5		9	0.48	0.52		9	0.235294	0.764706		8	0.478261	0.521739		17	0.5	0.5		9	0.621622	0.621622		9	0.521739	0.521739		9	0.611111	0.611111
10	0.464286	0.535714		10	0.517241	0.517241		9	0.48	0.52		9	0.45	0.55		9	0.333333	0.666667		9	0.5	0.5		17	0.521739	0.521739		10	0.434783	0.565217		9	0.541667	0.541667		9	0.617647	0.617647
10	0.47619	0.52381		10	0.583333	0.583333		9	0.454545	0.545455		9	0.47619	0.52381		9	0.315789	0.684211		9	0.40625	0.59375		18	0.454545	0.545455		10	0.5	0.5		9	0.65	0.65		9	0.333333	0.666667
10	0.52	0.52		10	0.576923	0.576923		9	0.423077	0.576923		9	0.263158	0.736842		9	0.538462	0.538462		9	0.516129	0.516129		18	0.428571	0.571429		10	0.5	0.5		9	0.53125	0.53125		9	0.4	0.6
10	0.5	0.5		10	0.571429	0.571429		9	0.433333	0.566667		9	0.761905	0.761905		9	0.483871	0.516129		9	0.45	0.55		18	0.481481	0.518519		10	0.457143	0.542857		10	0.388889	0.611111		10	0.580645	0.580645
12	0.483871	0.516129		12	0.464286	0.535714		9	0.466667	0.533333		9	0.65	0.65		9	0	1		9	0.44	0.56		18	0.545455	0.545455		10	0.470588	0.529412		10	0.434783	0.565217		10	0.425	0.575
12	0.457143	0.542857		12	0.535714	0.535714		9	0.5	0.5		9	0.346154	0.653846		9	1	1		9	0.5	0.5		18	0.55	0.55		12	0.481481	0.518519		10	0.363636	0.636364		10	0.607143	0.607143
12	0.466667	0.533333		12	0.44	0.56		10	0.46875	0.53125		9	0.428571	0.571429		10	0.478261	0.521739		9	0.483871	0.516129		18	0.52	0.52		12	0.518519	0.518519		10	0.238095	0.761905		10	0.666667	0.666667
12	0.5	0.5		12	0.521739	0.521739		10	0.5	0.5		9	0.222222	0.777778		10	0.590909	0.590909		9	0.482759	0.517241		18	0.47619	0.52381		12	0.419355	0.580645		10	0.526316	0.526316		10	0.764706	0.764706
12	0.46875	0.53125		12	0.409091	0.590909		10	0.482759	0.517241		10	0.5	0.5		10	0.571429	0.571429		9	0.516129	0.516129						12	0.451613	0.548387		10	0.736842	0.736842		10	0.111111	0.888889
12	0.5	0.5		12	0.541667	0.541667		10	0.464286	0.535714		10	0.44	0.56		10	0.703704	0.703704		10	0.533333	0.533333						12	0.4	0.6		10	0.75	0.75		10	0.235294	0.764706
12	0.454545	0.545455		12	0.419355	0.580645		10	0.535714	0.535714		10	0.566667	0.566667		10	0.52	0.52		10	0.5	0.5						12	0.5	0.5		10	0.708333	0.708333		10	0.8	0.8
12	0.518519	0.518519		12	0.517241	0.517241		10	0.521739	0.521739		10	0.551724	0.551724		10	0.684211	0.684211		10	0.515152	0.515152						12	0.48	0.52		10	0.866667	0.866667		10	0.882353	0.882353
12	0.405405	0.594595		12	0.5	0.5		10	0.590909	0.590909		10	0.608696	0.608696		10	0.736842	0.736842		10	0.451613	0.548387						12	0.516129	0.516129		10	0.652174	0.652174		12	0.37037	0.62963
12	0.5	0.5		12	0.564103	0.564103		10	0.428571	0.571429		10	0.681818	0.681818		10	0.736842	0.736842		10	0.4375	0.5625						13	0.55	0.55		10	0.655172	0.655172		12	0.526316	0.526316
12	0.5	0.5		12	0.375	0.625		10	0.48	0.52		10	0.684211	0.684211		12	0.619048	0.619048		10	0.52381	0.52381						13	0.515152	0.515152		12	0.375	0.625		12	0.307692	0.692308
12	0.5	0.5		12	0.454545	0.545455		10	0.571429	0.571429		10	0.761905	0.761905		12	0.631579	0.631579		10	0.515152	0.515152						13	0.47619	0.52381		12	0.444444	0.555556		12	0.275862	0.724138
13	0.470588	0.529412		13	0.527778	0.527778		10	0.347826	0.652174		10	0.517241	0.517241		12	0.478261	0.521739		10	0.488372	0.511628						13	0.571429	0.571429		12	0.434783	0.565217		12	0.52381	0.52381
13	0.483871	0.516129		13	0.5	0.5		10	0.375	0.625		10	0.571429	0.571429		12	0.423077	0.576923		10	0.391304	0.608696						13	0.625	0.625		12	0.454545	0.545455		12	0.52381	0.52381
13	0.5	0.5		13	0.466667	0.533333		12	0.56	0.56		12	0.458333	0.541667		12	0.458333	0.541667		10	0.48	0.52						13	0.484848	0.515152		12	0.409091	0.590909		12	0.263158	0.736842
13	0.481481	0.518519		13	0.617647	0.617647		12	0.48	0.52		12	0.454545	0.545455		12	0.424242	0.575758		12	0.5	0.5						13	0.566667	0.566667		12	0.56	0.56		12	0.380952	0.619048
13	0.565217	0.565217		13	0.565217	0.565217		12	0.545455	0.545455		12	0.46875	0.53125		12	0.529412	0.529412		12	0.36	0.64						13	0.56	0.56		12	0.380952	0.619048		12	0.192308	0.807692
13	0.541667	0.541667		13	0.636364	0.636364		12	0.323529	0.676471		12	0.589744	0.589744		12	0.409091	0.590909		12	0.5	0.5						13	0.488372	0.511628		12	0.5	0.5		12	0.35	0.65
13	0.478261	0.521739		13	0.551724	0.551724		12	0.533333	0.533333		12	0.473684	0.526316		12	0.416667	0.583333		12	0.535714	0.535714						13	0.514286	0.514286		13	0.444444	0.555556		13	0.533333	0.533333
13	0.52381	0.52381		13	0.5	0.5		12	0.555556	0.555556		12	0.421053	0.578947		12	0.478261	0.521739		12	0.511628	0.511628						14	0.451613	0.548387		13	0.48	0.52		13	0.515152	0.515152
13	0.538462	0.538462		13	0.588235	0.588235		13	0.516129	0.516129		12	0.522727	0.522727		12	0.526316	0.526316		12	0.444444	0.555556						14	0.5	0.5		13	0.588235	0.588235		13	0.541667	0.541667
13	0.444444	0.555556		14	0.46875	0.53125		13	0.56	0.56		12	0.571429	0.571429		13	0.555556	0.555556		12	0.5	0.5						14	0.484848	0.515152		13	0.555556	0.555556		13	0.666667	0.666667
13	0.555556	0.555556		14	0.5	0.5		13	0.517241	0.517241		12	0.478261	0.521739		13	0.533333	0.533333		12	0.444444	0.555556						14	0.391304	0.608696		13	0.433333	0.566667		13	0.666667	0.666667
13	0.52	0.52		14	0.464286	0.535714		13	0.34375	0.65625		13	0.576923	0.576923		13	0.473684	0.526316		13	0.516129	0.516129						14	0.451613	0.548387		13	0.414634	0.585366		13	0.65	0.65
14	0.52381	0.52381		14	0.5	0.5		13	0.5	0.5		13	0.518519	0.518519		13	0.512195	0.512195		13	0.586207	0.586207						14	0.5	0.5		13	0.48	0.52		13	0.772727	0.772727
14	0.47619	0.52381		14	0.37931	0.62069		13	0.527778	0.527778		13	0.541667	0.541667		13	0.482759	0.517241		13	0.5	0.5						14	0.482759	0.517241		13	0.512821	0.512821		13	0.782609	0.782609
14	0.548387	0.548387		14	0.444444	0.555556		13	0.348837	0.651163		13	0.565217	0.565217		13	0.459459	0.540541		13	0.580645	0.580645						14	0.481481	0.518519		13	0.568182	0.568182		13	0.740741	0.740741
14	0.571429	0.571429		14	0.458333	0.541667		13	0.6875	0.6875		13	0.466667	0.533333		13	0.454545	0.545455		13	0.5	0.5						15	0.487805	0.512195		13	0.517241	0.517241		13	0.692308	0.692308
14	0.454545	0.545455		14	0.5	0.5		13	0.53125	0.53125		13	0.428571	0.571429		13	0.487179	0.512821		13	0.464286	0.535714						15	0.533333	0.533333		14	0.428571	0.571429		14	0.44	0.56
14	0.5	0.5		15	0.583333	0.583333		14	0.407407	0.592593		14	0.357143	0.642857		14	0.5	0.5		14	0.448276	0.551724						15	0.55	0.55		14	0.483871	0.516129		14	0.52	0.52
14	0.533333	0.533333		15	0.542857	0.542857		14	0.444444	0.555556		14	0.46875	0.53125		14	0.5	0.5		14	0.434783	0.565217						15	0.529412	0.529412		14	0.413793	0.586207		14	0.458333	0.541667
14	0.47619	0.52381		15	0.515152	0.515152		14	0.464286	0.535714		14	0.458333	0.541667		14	0.347826	0.652174		14	0.488372	0.511628						15	0.55	0.55		14	0.482759	0.517241		14	0.458333	0.541667
14	0.48	0.52		15	0.482759	0.517241		14	0.5	0.5		14	0.48	0.52		14	0.363636	0.636364		14	0.541667	0.541667						15	0.448276	0.551724		14	0.424242	0.575758		14	0.4	0.6
14	0.52381	0.52381		15	0.5	0.5		14	0.47619	0.52381		14	0.428571	0.571429		14	0.4	0.6		14	0.5	0.5						15	0.514286	0.514286		14	0.5	0.5		14	0.391304	0.608696
15	0.484848	0.515152		15	0.478261	0.521739		14	0.478261	0.521739		14	0.384615	0.615385		14	0.444444	0.555556		14	0.433333	0.566667						15	0.487179	0.512821		14	0.481481	0.518519		14	0.333333	0.666667
15	0.484848	0.515152		15	0.478261	0.521739		14	0.521739	0.521739		14	0.478261	0.521739		14	0.478261	0.521739		15	0.5	0.5						15	0.5	0.5		14	0.464286	0.535714		14	0.478261	0.521739
15	0.464286	0.535714		15	0.361111	0.638889		14	0.466667	0.533333		14	0.4375	0.5625		14	0.458333	0.541667		15	0.518519	0.518519						15	0.518519	0.518519		14	0.490196	0.509804		14	0.44	0.56
15	0.518519	0.518519		15	0.5	0.5		14	0.428571	0.571429		14	0.521739	0.521739		14	0.461538	0.538462		15	0.538462	0.538462						15	0.518519	0.518519		14	0.435897	0.564103		14	0.631579	0.631579
15	0.5625	0.5625		16	0.551724	0.551724		15	0.444444	0.555556		14	0.5	0.5		14	0.481481	0.518519		15	0.56	0.56						16	0.5	0.5		15	0.448276	0.551724		15	0.461538	0.538462
15	0.5	0.5		16	0.518519	0.518519		15	0.478261	0.521739		14	0.478261	0.521739		15	0.44	0.56		15	0.5	0.5						16	0.56	0.56		15	0.5	0.5		15	0.521739	0.521739
15	0.521739	0.521739		16	0.481481	0.518519		15	0.647059	0.647059		15	0.478261	0.521739		15	0.869565	0.869565		15	0.486486	0.513514						16	0.59375	0.59375		15	0.516129	0.516129		15	0.6	0.6
15	0.466667	0.533333		16	0.521739	0.521739		15	0.434783	0.565217		15	0.5	0.5		15	0.8	0.8		15	0.466667	0.533333						16	0.533333	0.533333		15	0.548387	0.548387		15	0.111111	0.888889
15	0.487179	0.512821		16	0.545455	0.545455		15	0.428571	0.571429		15	0.333333	0.666667		15	0.789474	0.789474		15	0.535714	0.535714						16	0.555556	0.555556		15	0.631579	0.631579		15	0.8125	0.8125
16	0.5	0.5		16	0.458333	0.541667		15	0.71875	0.71875		15	0.380952	0.619048		15	0.461538	0.538462		15	0.423077	0.576923						16	0.5	0.5		15	0.6	0.6		15	0.8	0.8
16	0.481481	0.518519		16	0.515152	0.515152		15	0.514286	0.514286		15	0.586207	0.586207		15	0.583333	0.583333		15	0.434783	0.565217						16	0.575758	0.575758		15	0.571429	0.571429		15	0.8	0.8
16	0.538462	0.538462		16	0.541667	0.541667		15	0.3	0.7		15	0.384615	0.615385		15	0.55	0.55		16	0.56	0.56						16	0.423077	0.576923		15	0.517241	0.517241		15	0.866667	0.866667
16	0.590909	0.590909		16	0.5625	0.5625		15	0.272727	0.727273		15	0.551724	0.551724		15	0.592593	0.592593		16	0.470588	0.529412						16	0.447368	0.552632		16	0.484848	0.515152		15	0.666667	0.666667
16	0.545455	0.545455		16	0.444444	0.555556		16	0.56	0.56		15	0.695652	0.695652		15	0.677419	0.677419		16	0.565217	0.565217						16	0.555556	0.555556		16	0.545455	0.545455		15	0.454545	0.545455
16	0.576923	0.576923		16	0.394737	0.605263		16	0.64	0.64		15	0.789474	0.789474		16	0.5	0.5		16	0.52	0.52						16	0.526316	0.526316		16	0.5	0.5		16	0.576923	0.576923
16	0.5625	0.5625		16	0.372093	0.627907		16	0.428571	0.571429		16	0.56	0.56		16	0.481481	0.518519		16	0.619048	0.619048						16	0.548387	0.548387		16	0.5	0.5		16	0.541667	0.541667
16	0.545455	0.545455		17	0.484848	0.515152		16	0.346154	0.653846		16	0.481481	0.518519		16	0.545455	0.545455		16	0.473684	0.526316						17	0.46875	0.53125		16	0.518519	0.518519		16	0.538462	0.538462
16	0.536585	0.536585		17	0.470588	0.529412		16	0.363636	0.636364		16	0.521739	0.521739		16	0.5	0.5		16	0.607143	0.607143						17	0.538462	0.538462		16	0.53125	0.53125		16	0.571429	0.571429
16	0.435897	0.564103		17	0.483871	0.516129		16	0.586207	0.586207		16	0.714286	0.714286		16	0.5	0.5		16	0.517241	0.517241						17	0.529412	0.529412		16	0.5	0.5		16	0.515152	0.515152
16	0.571429	0.571429		17	0.428571	0.571429		16	0.555556	0.555556		16	0.833333	0.833333		16	0.552632	0.552632		16	0.470588	0.529412						17	0.470588	0.529412		16	0.62069	0.62069		16	0.586207	0.586207
17	0.487805	0.512195		17	0.487179	0.512821		16	0.541667	0.541667		17	0.484848	0.515152		16	0.26	0.74		16	0.5	0.5						17	0.485714	0.514286		16	0.68	0.68		16	0.541667	0.541667
17	0.5	0.5		17	0.484848	0.515152		16	0.590909	0.590909		17	0.5	0.5		16	0.466667	0.533333		17	0.518519	0.518519						17	0.535714	0.535714		17	0.5	0.5		17	0.464286	0.535714
17	0.484848	0.515152		17	0.555556	0.555556		17	0.464286	0.535714		17	0.48	0.52		17	0.44	0.56		17	0.464286	0.535714						17	0.533333	0.533333		17	0.558824	0.558824		17	0.481481	0.518519
17	0.5	0.5		17	0.518519	0.518519		17	0.461538	0.538462		17	0.565217	0.565217		17	0.478261	0.521739		17	0.515152	0.515152						17	0.425	0.575		17	0.53125	0.53125		17	0.388889	0.611111
17	0.535714	0.535714		17	0.555556	0.555556		17	0.0571429	0.942857		17	0.48	0.52		17	0.461538	0.538462		17	0.555556	0.555556						17	0.5	0.5		17	0.485714	0.514286		17	0.448276	0.551724
17	0.5	0.5		17	0.657895	0.657895		17	0.230769	0.769231		17	0.458333	0.541667		17	0.521739	0.521739		17	0.447368	0.552632						17	0.481481	0.518519		17	0.466667	0.533333		17	0.375	0.625
17	0.52	0.52		17	0.5	0.5		17	0.545455	0.545455		17	0.461538	0.538462		17	0.428571	0.571429		17	0.5	0.5						18	0.5	0.5		17	0.518519	0.518519		17	0.5	0.5
17	0.485714	0.514286		17	0.555556	0.555556		17	0.48	0.52		17	0.52	0.52		17	0.394737	0.605263		17	0.461538	0.538462						18	0.5	0.5		17	0.576923	0.576923		17	0.533333	0.533333
17	0.46875	0.53125		18	0.517241	0.517241		18	0.434783	0.565217		17	0.65	0.65		17	0.40625	0.59375		17	0.40625	0.59375						18	0.485714	0.514286		17	0.485714	0.514286		17	0.451613	0.548387
18	0.5	0.5		18	0.470588	0.529412		18	0.521739	0.521739		18	0.478261	0.521739		17	0.5	0.5		17	0.444444	0.555556						18	0.5	0.5		17	0.457143	0.542857		17	0.583333	0.583333
18	0.448276	0.551724		18	0.5	0.5		18	0.4	0.6		18	0.5	0.5		17	0.52	0.52		18	0.484848	0.515152						18	0.574468	0.574468		18	0.518519	0.518519		17	0.454545	0.545455
18	0.481481	0.518519		18	0.371429	0.628571		18	0.484848	0.515152		18	0.545455	0.545455		17	0.5	0.5		18	0.44	0.56						18	0.535714	0.535714		18	0.566667	0.566667		18	0.444444	0.555556
18	0.44	0.56		18	0.5	0.5		18	0.473684	0.526316		18	0.5	0.5		18	0.48	0.52		18	0.5625	0.5625						18	0.516129	0.516129		18	0.55	0.55		18	0.482759	0.517241
18	0.538462	0.538462		18	0.464286	0.535714		18	0.425	0.575		18	0.56	0.56		18	0.458333	0.541667		18	0.461538	0.538462						18	0.5	0.5		18	0.535714	0.535714		18	0.583333	0.583333
18	0.461538	0.538462		18	0.454545	0.545455		18	0.571429	0.571429		18	0.478261	0.521739		18	0.428571	0.571429		18	0.517241	0.517241						18	0.464286	0.535714		18	0.464286	0.535714		18	0.705882	0.705882
18	0.384615	0.615385		18	0.47619	0.52381		18	0.578947	0.578947		18	0.52	0.52		18	0.5	0.5		18	0.444444	0.555556						18	0.458333	0.541667		18	0.424242	0.575758		18	0.555556	0.555556
18	0.458333	0.541667		18	0.454545	0.545455		18	0.566667	0.566667		18	0.583333	0.583333		18	0.478261	0.521739		18	0.387097	0.612903						18	0.5	0.5		18	0.619048	0.619048		18	0.368421	0.631579
18	0.517241	0.517241		18	0.6	0.6		18	0.482759	0.517241		18	0.52381	0.52381		18	0.526316	0.526316		18	0.545455	0.545455						18	0.5	0.5		18	0.458333	0.541667		18	0.421053	0.578947
18	0.458333	0.541667		18	0.48	0.52		18	0.454545	0.545455		18	0.75	0.75		18	0.684211	0.684211		18	0.458333	0.541667						18	0.444444	0.555556		18	0.608696	0.608696		18	0.166667	0.833333
18	0.481481	0.518519		18	0.47619	0.52381		18	0.333333	0.666667		18	0.75	0.75		18	0.7	0.7		18	0.545455	0.545455						18	0.483871	0.516129		18	0.586207	0.586207		18	0.5	0.5

## Sheet: L-R_hindlimbs
Animal_ID	Baseline_rawPhase	Baseline_transPhase		Animal_ID	PreDox1_rawPhase	PreDox1_transPhase		Animal_ID	Dox1Day3_rawPhase	Dox1Day3_transPhase		Animal_ID	Dox1Day5_rawPhase	Dox1Day5_transPhase		Animal_ID	Dox1Day8_rawPhase	Dox1Day8_transPhase		Animal_ID	DoxOff_rawPhase	DoxOff_transPhase		Animal_ID	SugarCon_rawPhase	SugarCon_transPhase		Animal_ID	PreDox2_rawPhase	PreDox2_transPhase		Animal_ID	Dox2Day3_rawPhase	Dox2Day3_transPhase		Animal_ID	Dox2Day5_rawPhase	Dox2Day5_transPhase
1	0.470588	0.529412		1	0.454545	0.545455		1	0.516129	0.516129		1	0.545455	0.545455		1	0.941176	0.941176		1	0.470588	0.529412		12	0.5	0.5		1	0.472222	0.527778		1	0.484848	0.515152		1	0.522727	0.522727
1	0.454545	0.545455		1	0.483871	0.516129		1	0.466667	0.533333		1	0.535714	0.535714		1	0.0294118	0.970588		1	0.5	0.5		12	0.52	0.52		1	0.5	0.5		1	0.444444	0.555556		1	0.459459	0.540541
1	0.5	0.5		1	0.472222	0.527778		1	0.448276	0.551724		1	0.53125	0.53125		1	0.0333333	0.966667		1	0.483871	0.516129		12	0.484848	0.515152		1	0.516129	0.516129		1	0.5	0.5		1	0.5	0.5
1	0.405405	0.594595		1	0.464286	0.535714		1	0.44	0.56		1	0.444444	0.555556		1	0.419355	0.580645		1	0.464286	0.535714		12	0.535714	0.535714		1	0.535714	0.535714		1	0.45	0.55		1	0.475	0.525
1	0.485714	0.514286		1	0.5	0.5		1	0.484848	0.515152		1	0.548387	0.548387		1	0.459459	0.540541		1	0.46875	0.53125		12	0.518519	0.518519		1	0.5	0.5		1	0.444444	0.555556		1	0.516129	0.516129
1	0.407407	0.592593		1	0.466667	0.533333		1	0.551724	0.551724		1	0.545455	0.545455		1	0.588235	0.588235		1	0.486486	0.513514		12	0.5	0.5		1	0.5	0.5		1	0.454545	0.545455		1	0.431818	0.568182
1	0.366667	0.633333		2	0.5	0.5		2	0.441176	0.558824		1	0.545455	0.545455		1	0.451613	0.548387		1	0.529412	0.529412		13	0.666667	0.666667		1	0.5	0.5		1	0.46875	0.53125		1	0.555556	0.555556
1	0.483871	0.516129		2	0.555556	0.555556		2	0.5	0.5		1	0.484848	0.515152		1	0.534884	0.534884		1	0.5	0.5		13	0.607143	0.607143		1	0.53125	0.53125		1	0.466667	0.533333		1	0.517241	0.517241
1	0.516129	0.516129		2	0.545455	0.545455		2	0.535714	0.535714		1	0.586207	0.586207		1	0.547619	0.547619		1	0.512195	0.512195		13	0.535714	0.535714		1	0.5	0.5		2	0.482759	0.517241		2	0.5	0.5
2	0.516129	0.516129		2	0.5	0.5		2	0.607143	0.607143		1	0.62069	0.62069		1	0.44186	0.55814		1	0.451613	0.548387		13	0.542857	0.542857		2	0.423077	0.576923		2	0.607143	0.607143		2	0.574468	0.574468
2	0.485714	0.514286		2	0.5	0.5		2	0.481481	0.518519		2	0.586207	0.586207		2	0.48	0.52		1	0.46875	0.53125		13	0.566667	0.566667		2	0.5	0.5		2	0.52	0.52		2	0.533333	0.533333
2	0.483871	0.516129		2	0.535714	0.535714		2	0.5	0.5		2	0.548387	0.548387		2	0.46875	0.53125		2	0.461538	0.538462		13	0.588235	0.588235		2	0.48	0.52		2	0.545455	0.545455		2	0.486486	0.513514
2	0.407407	0.592593		2	0.517241	0.517241		2	0.416667	0.583333		2	0.538462	0.538462		2	0.481481	0.518519		2	0.5	0.5		14	0.464286	0.535714		2	0.513514	0.513514		2	0.588235	0.588235		2	0.516129	0.516129
2	0.466667	0.533333		7	0.527778	0.527778		2	0.461538	0.538462		2	0.529412	0.529412		2	0.461538	0.538462		2	0.5	0.5		14	0.413793	0.586207		2	0.5	0.5		2	0.527778	0.527778		2	0.571429	0.571429
2	0.533333	0.533333		7	0.566667	0.566667		2	0.5	0.5		2	0.485714	0.514286		2	0.407407	0.592593		2	0.470588	0.529412		14	0.464286	0.535714		2	0.512821	0.512821		2	0.59375	0.59375		2	0.478261	0.521739
2	0.482759	0.517241		7	0.5	0.5		7	0.413793	0.586207		2	0.487805	0.512195		2	0.5	0.5		2	0.5	0.5		14	0.571429	0.571429		2	0.533333	0.533333		2	0.382353	0.617647		2	0.481481	0.518519
2	0.583333	0.583333		7	0.512195	0.512195		7	0.40625	0.59375		2	0.514286	0.514286		2	0.565217	0.565217		2	0.466667	0.533333		14	0.5	0.5		2	0.545455	0.545455		7	0.5	0.5		7	0.40625	0.59375
2	0.416667	0.583333		7	0.64	0.64		7	0.538462	0.538462		2	0.555556	0.555556		2	0.576923	0.576923		2	0.5	0.5		14	0.5	0.5		2	0.545455	0.545455		7	0.575758	0.575758		7	0.5	0.5
2	0.571429	0.571429		7	0.5	0.5		7	0.538462	0.538462		2	0.428571	0.571429		2	0.5	0.5		2	0.392857	0.607143		14	0.517241	0.517241		2	0.457143	0.542857		7	0.62069	0.62069		7	0.586207	0.586207
7	0.483871	0.516129		7	0.5	0.5		7	0.576923	0.576923		2	0.571429	0.571429		7	0.464286	0.535714		7	0.484848	0.515152		14	0.423077	0.576923		7	0.485714	0.514286		7	0.612903	0.612903		7	0.566667	0.566667
7	0.5625	0.5625		7	0.5	0.5		7	0.612903	0.612903		7	0.483871	0.516129		7	0.448276	0.551724		7	0.512821	0.512821		15	0.416667	0.583333		7	0.527778	0.527778		7	0.395833	0.604167		7	0.535714	0.535714
7	0.695652	0.695652		7	0.642857	0.642857		7	0.515152	0.515152		7	0.62069	0.62069		7	0.395349	0.604651		7	0.615385	0.615385		15	0.423077	0.576923		7	0.53125	0.53125		7	0.441176	0.558824		7	0.576923	0.576923
7	0.56	0.56		7	0.461538	0.538462		7	0.589744	0.589744		7	0.594595	0.594595		7	0.513514	0.513514		7	0.377358	0.622642		15	0.62069	0.62069		7	0.481481	0.518519		7	0.5	0.5		7	0.451613	0.548387
7	0.666667	0.666667		7	0.419355	0.580645		8	0.46875	0.53125		7	0.411765	0.588235		7	0.459459	0.540541		7	0.510638	0.510638		15	0.37037	0.62963		7	0.5	0.5		7	0.64	0.64		7	0.576923	0.576923
7	0.32	0.68		7	0.464286	0.535714		8	0.567568	0.567568		7	0.534884	0.534884		7	0.515152	0.515152		7	0.485714	0.514286		15	0.448276	0.551724		7	0.519231	0.519231		7	0.68	0.68		7	0.590909	0.590909
7	0.5	0.5		8	0.548387	0.548387		8	0.5625	0.5625		7	0.384615	0.615385		7	0.555556	0.555556		7	0.612903	0.612903		15	0.538462	0.538462		7	0.518519	0.518519		7	0.772727	0.772727		7	0.586207	0.586207
8	0.5	0.5		8	0.46875	0.53125		8	0.62963	0.62963		7	0.486486	0.513514		7	0.527778	0.527778		7	0.516129	0.516129		15	0.56	0.56		7	0.566667	0.566667		8	0.533333	0.533333		8	0.642857	0.642857
8	0.428571	0.571429		8	0.583333	0.583333		8	0.464286	0.535714		7	0.513514	0.513514		8	0.45	0.55		7	0.564103	0.564103		15	0.451613	0.548387		8	0.448276	0.551724		8	0.451613	0.548387		8	0.653846	0.653846
8	0.466667	0.533333		8	0.575758	0.575758		8	0.484848	0.515152		7	0.5	0.5		8	0.457143	0.542857		7	0.534884	0.534884		15	0.481481	0.518519		8	0.46875	0.53125		8	0.576923	0.576923		8	0.6	0.6
8	0.53125	0.53125		8	0.5	0.5		8	0.540541	0.540541		7	0.653846	0.653846		8	0.535714	0.535714		7	0.666667	0.666667		16	0.555556	0.555556		8	0.681818	0.681818		8	0.517241	0.517241		8	0.514286	0.514286
8	0.448276	0.551724		8	0.551724	0.551724		8	0.424242	0.575758		7	0.633333	0.633333		8	0.5625	0.5625		8	0.533333	0.533333		16	0.533333	0.533333		8	0.6	0.6		8	0.515152	0.515152		8	0.538462	0.538462
9	0.576923	0.576923		8	0.586207	0.586207		8	0.526316	0.526316		8	0.567568	0.567568		8	0.564103	0.564103		8	0.527778	0.527778		16	0.571429	0.571429		8	0.6	0.6		8	0.607143	0.607143		8	0.64	0.64
9	0.566667	0.566667		8	0.566667	0.566667		8	0.525	0.525		8	0.451613	0.548387		8	0.55814	0.55814		8	0.517241	0.517241		16	0.5	0.5		8	0.4	0.6		8	0.68	0.68		8	0.615385	0.615385
9	0.692308	0.692308		9	0.464286	0.535714		9	0.470588	0.529412		8	0.478261	0.521739		8	0.527778	0.527778		8	0.575758	0.575758		16	0.608696	0.608696		8	0.541667	0.541667		8	0.64	0.64		9	0.5	0.5
9	0.5	0.5		9	0.516129	0.516129		9	0.527778	0.527778		8	0.481481	0.518519		8	0.538462	0.538462		8	0.548387	0.548387		16	0.5	0.5		8	0.5	0.5		8	0.681818	0.681818		9	0.625	0.625
9	0.533333	0.533333		9	0.433333	0.566667		9	0.5	0.5		8	0.612903	0.612903		8	0.542857	0.542857		8	0.536585	0.536585		16	0.55	0.55		9	0.444444	0.555556		9	0.52	0.52		9	0	1
9	0.485714	0.514286		9	0.433333	0.566667		9	0.461538	0.538462		8	0.607143	0.607143		8	0.516129	0.516129		8	0.447368	0.552632		17	0.541667	0.541667		9	0.461538	0.538462		9	0.695652	0.695652		9	1	1
9	0.478261	0.521739		9	0.448276	0.551724		9	0.5	0.5		8	0.485714	0.514286		9	0.52	0.52		8	0.5	0.5		17	0.52	0.52		9	0.55	0.55		9	0.85	0.85		9	0.37037	0.62963
9	0.444444	0.555556		9	0.551724	0.551724		9	0.466667	0.533333		8	0.575758	0.575758		9	0.535714	0.535714		8	0.5	0.5		17	0.518519	0.518519		9	0.52381	0.52381		9	0.517241	0.517241		9	0.941176	0.941176
10	0.5	0.5		9	0.555556	0.555556		9	0.515152	0.515152		8	0.53125	0.53125		9	0.2	0.8		9	0.545455	0.545455		17	0.441176	0.558824		9	0.681818	0.681818		9	0.761905	0.761905		9	0.857143	0.857143
10	0.407407	0.592593		10	0.538462	0.538462		9	0.4	0.6		9	0.481481	0.518519		9	0.157895	0.842105		9	0.478261	0.521739		17	0.439024	0.560976		9	0.540541	0.540541		9	0.354839	0.645161		9	0.5	0.5
10	0.407407	0.592593		10	0.375	0.625		9	0.433333	0.566667		9	0.52	0.52		9	0.208333	0.791667		9	0.4375	0.5625		17	0.518519	0.518519		9	0.5	0.5		9	0.478261	0.521739		9	0.606061	0.606061
10	0.625	0.625		10	0.538462	0.538462		9	0.518519	0.518519		9	0.4	0.6		9	0.142857	0.857143		9	0.37931	0.62069		18	0.565217	0.565217		10	0.416667	0.583333		9	0.451613	0.548387		9	0.210526	0.789474
10	0.5	0.5		10	0.545455	0.545455		10	0.46875	0.53125		9	0.428571	0.571429		9	0.555556	0.555556		9	0.529412	0.529412		18	0.454545	0.545455		10	0.363636	0.636364		9	0.95	0.95		10	0.428571	0.571429
10	0.521739	0.521739		10	0.461538	0.538462		10	0.407407	0.592593		9	0.1	0.9		9	0.62069	0.62069		9	0.4	0.6		18	0.409091	0.590909		10	0.565217	0.565217		9	0.526316	0.526316		10	0.52381	0.52381
10	0.416667	0.583333		10	0.375	0.625		10	0.481481	0.518519		9	0.217391	0.782609		9	0	1		9	0.517241	0.517241		18	0.565217	0.565217		10	0.444444	0.555556		10	0.272727	0.727273		10	0.772727	0.772727
12	0.545455	0.545455		10	0.5	0.5		10	0.482759	0.517241		9	0.909091	0.909091		9	1	1		9	0.481481	0.518519		18	0.571429	0.571429		12	0.444444	0.555556		10	0.15	0.85		10	0.789474	0.789474
12	0.448276	0.551724		10	0.481481	0.518519		10	0.636364	0.636364		9	0.259259	0.740741		10	0.44	0.56		9	0.542857	0.542857		18	0.571429	0.571429		12	0.481481	0.518519		10	0.15	0.85		10	0.888889	0.888889
12	0.466667	0.533333		10	0.518519	0.518519		10	0.6	0.6		9	0.275862	0.724138		10	0.35	0.65		10	0.517241	0.517241		18	0.64	0.64		12	0.551724	0.551724		10	0.0833333	0.916667		10	0.0526316	0.947368
12	0.548387	0.548387		10	0.56	0.56		10	0.478261	0.521739		9	0.466667	0.533333		10	0.666667	0.666667		10	0.458333	0.541667		18	0.608696	0.608696		12	0.433333	0.566667		10	0.276596	0.723404		10	0.142857	0.857143
12	0.5	0.5		10	0.545455	0.545455		10	0.25	0.75		10	0.416667	0.583333		10	0.625	0.625		10	0.533333	0.533333						12	0.366667	0.633333		10	0.888889	0.888889		10	0.857143	0.857143
12	0.48	0.52		10	0.590909	0.590909		10	0.666667	0.666667		10	0.458333	0.541667		10	0.625	0.625		10	0.46875	0.53125						12	0.517241	0.517241		10	0	1		10	1	1
12	0.454545	0.545455		12	0.407407	0.592593		10	0.590909	0.590909		10	0.5	0.5		10	0.9	0.9		10	0.461538	0.538462						12	0.652174	0.652174		10	1	1		10	0.944444	0.944444
12	0.5	0.5		12	0.451613	0.548387		10	0.238095	0.761905		10	0.571429	0.571429		10	0.904762	0.904762		10	0.428571	0.571429						12	0.444444	0.555556		10	0.791667	0.791667		12	0.375	0.625
12	0.5	0.5		12	0.5	0.5		10	0.173913	0.826087		10	0.85	0.85		10	0.947368	0.947368		10	0.416667	0.583333						12	0.5	0.5		10	0.766667	0.766667		12	0.714286	0.714286
12	0.517241	0.517241		12	0.5	0.5		10	0.230769	0.769231		10	0.681818	0.681818		10	0.842105	0.842105		10	0.363636	0.636364						13	0.540541	0.540541		12	0.413793	0.586207		12	0.269231	0.730769
13	0.451613	0.548387		12	0.434783	0.565217		12	0.555556	0.555556		10	0.888889	0.888889		12	0.8	0.8		10	0.458333	0.541667						13	0.617647	0.617647		12	0.461538	0.538462		12	0.166667	0.833333
13	0.441176	0.558824		12	0.521739	0.521739		12	0.538462	0.538462		10	0.952381	0.952381		12	0.5	0.5		10	0.44	0.56						13	0.547619	0.547619		12	0.5	0.5		12	0.952381	0.952381
13	0.571429	0.571429		12	0.517241	0.517241		12	0.52	0.52		10	0.404762	0.595238		12	0.478261	0.521739		12	0.461538	0.538462						13	0.553191	0.553191		12	0.478261	0.521739		12	0.619048	0.619048
13	0.5	0.5		12	0.516129	0.516129		12	0.352941	0.647059		10	0.592593	0.592593		12	0.291667	0.708333		12	0.304348	0.695652						13	0.571429	0.571429		12	0.545455	0.545455		12	0.15	0.85
13	0.583333	0.583333		12	0.485714	0.514286		12	0.5625	0.5625		12	0.416667	0.583333		12	0.304348	0.695652		12	0.346154	0.653846						13	0.588235	0.588235		12	0.6	0.6		12	0.304348	0.695652
13	0.583333	0.583333		12	0.423077	0.576923		12	0.733333	0.733333		12	0.458333	0.541667		12	0.472222	0.527778		12	0.566667	0.566667						13	0.516129	0.516129		12	0.652174	0.652174		12	0.208333	0.791667
13	0.409091	0.590909		13	0.545455	0.545455		13	0.5	0.5		12	0.457143	0.542857		12	0.448276	0.551724		12	0.512195	0.512195						13	0.566667	0.566667		12	0.238095	0.761905		12	0.15	0.85
13	0.5	0.5		13	0.512821	0.512821		13	0.533333	0.533333		12	0.5	0.5		12	0.477273	0.522727		12	0.483871	0.516129						13	0.592593	0.592593		12	0.458333	0.541667		13	0.535714	0.535714
13	0.538462	0.538462		13	0.535714	0.535714		13	0.516129	0.516129		12	0.361111	0.638889		12	0.560976	0.560976		12	0.575758	0.575758						13	0.608696	0.608696		13	0.464286	0.535714		13	0.483871	0.516129
13	0.518519	0.518519		13	0.555556	0.555556		13	0.518519	0.518519		12	0.472222	0.527778		12	0.615385	0.615385		12	0.533333	0.533333						13	0.527778	0.527778		13	0.5	0.5		13	0.541667	0.541667
14	0.446809	0.553191		13	0.566667	0.566667		13	0.576923	0.576923		12	0.463415	0.536585		13	0.586207	0.586207		12	0.576923	0.576923						13	0.548387	0.548387		13	0.472222	0.527778		13	0.538462	0.538462
14	0.469388	0.530612		13	0.652174	0.652174		13	0.642857	0.642857		12	0.65	0.65		13	0.535714	0.535714		13	0.413793	0.586207						14	0.40625	0.59375		13	0.515152	0.515152		13	0.727273	0.727273
14	0.551724	0.551724		13	0.571429	0.571429		13	0.382353	0.617647		12	0.56	0.56		13	0.615385	0.615385		13	0.516129	0.516129						14	0.447368	0.552632		13	0.464286	0.535714		13	0.761905	0.761905
14	0.555556	0.555556		13	0.645161	0.645161		13	0.647059	0.647059		13	0.708333	0.708333		13	0.607843	0.607843		13	0.592593	0.592593						14	0.433333	0.566667		13	0.5	0.5		13	0.952381	0.952381
14	0.478261	0.521739		13	0.566667	0.566667		13	0.5	0.5		13	0.653846	0.653846		13	0.480769	0.519231		13	0.466667	0.533333						14	0.46875	0.53125		13	0.518519	0.518519		13	0.772727	0.772727
14	0.5	0.5		13	0.571429	0.571429		14	0.4375	0.5625		13	0.727273	0.727273		13	0.517241	0.517241		13	0.521739	0.521739						14	0.333333	0.666667		13	0.533333	0.533333		13	0.75	0.75
14	0.5	0.5		14	0.46875	0.53125		14	0.481481	0.518519		13	0.68	0.68		13	0.410256	0.589744		13	0.458333	0.541667						14	0.444444	0.555556		13	0.513514	0.513514		13	0.76	0.76
14	0.482759	0.517241		14	0.566667	0.566667		14	0.458333	0.541667		13	0.56	0.56		13	0.516129	0.516129		13	0.46875	0.53125						14	0.5	0.5		13	0.5	0.5		14	0.423077	0.576923
14	0.580645	0.580645		14	0.551724	0.551724		14	0.518519	0.518519		13	0.631579	0.631579		14	0.48	0.52		13	0.481481	0.518519						14	0.423077	0.576923		14	0.428571	0.571429		14	0.347826	0.652174
14	0.5	0.5		14	0.518519	0.518519		14	0.65	0.65		14	0.387097	0.612903		14	0.518519	0.518519		14	0.5	0.5						14	0.428571	0.571429		14	0.454545	0.545455		14	0.347826	0.652174
14	0.541667	0.541667		14	0.37931	0.62069		14	0.47619	0.52381		14	0.454545	0.545455		14	0.272727	0.727273		14	0.413793	0.586207						15	0.465116	0.534884		14	0.464286	0.535714		14	0.347826	0.652174
14	0.590909	0.590909		14	0.36	0.64		14	0.56	0.56		14	0.4	0.6		14	0.304348	0.695652		14	0.375	0.625						15	0.55814	0.55814		14	0.428571	0.571429		14	0.142857	0.857143
15	0.470588	0.529412		14	0.592593	0.592593		14	0.458333	0.541667		14	0.511628	0.511628		14	0.344828	0.655172		14	0.416667	0.583333						15	0.511628	0.511628		14	0.448276	0.551724		14	0.238095	0.761905
15	0.515152	0.515152		14	0.52	0.52		14	0.441176	0.558824		14	0.394737	0.605263		14	0.357143	0.642857		14	0.421053	0.578947						15	0.5	0.5		14	0.466667	0.533333		14	0.454545	0.545455
15	0.576923	0.576923		14	0.346154	0.653846		14	0.464286	0.535714		14	0.484848	0.515152		14	0.448276	0.551724		14	0.435897	0.564103						15	0.487805	0.512195		14	0.37037	0.62963		14	0.416667	0.583333
15	0.5	0.5		15	0.484848	0.515152		15	0.444444	0.555556		14	0.5	0.5		14	0.5	0.5		14	0.5	0.5						15	0.535714	0.535714		14	0.4	0.6		14	0.85	0.85
15	0.527778	0.527778		15	0.472222	0.527778		15	0.478261	0.521739		14	0.583333	0.583333		14	0.444444	0.555556		14	0.413793	0.586207						15	0.466667	0.533333		14	0.47619	0.52381		15	0.347826	0.652174
15	0.454545	0.545455		15	0.580645	0.580645		15	0.607143	0.607143		14	0.538462	0.538462		14	0.384615	0.615385		15	0.5	0.5						15	0.46875	0.53125		14	0.416667	0.583333		15	0.464286	0.535714
15	0.48	0.52		15	0.421053	0.578947		15	0.347826	0.652174		15	0.481481	0.518519		15	0.347826	0.652174		15	0.583333	0.583333						15	0.5	0.5		15	0.413793	0.586207		15	0.75	0.75
15	0.5	0.5		15	0.458333	0.541667		15	0.451613	0.548387		15	0.434783	0.565217		15	0.307692	0.692308		15	0.444444	0.555556						15	0.428571	0.571429		15	0.515152	0.515152		15	1	1
15	0.48	0.52		15	0.454545	0.545455		15	0.545455	0.545455		15	0.190476	0.809524		15	0.944444	0.944444		15	0.463415	0.536585						15	0.461538	0.538462		15	0.761905	0.761905		15	0.947368	0.947368
15	0.470588	0.529412		15	0.347826	0.652174		15	0.105263	0.894737		15	0.190476	0.809524		15	0	1		15	0.45	0.55						16	0.6	0.6		15	0.5625	0.5625		15	0.941176	0.941176
15	0.382353	0.617647		15	0.482759	0.517241		15	0.15	0.85		15	0.333333	0.666667		15	1	1		15	0.451613	0.548387						16	0.551724	0.551724		15	0.761905	0.761905		15	0.95	0.95
16	0.608696	0.608696		15	0.392857	0.607143		16	0.708333	0.708333		15	0.424242	0.575758		15	0.52	0.52		15	0.32	0.68						16	0.678571	0.678571		15	0.85	0.85		15	0	1
16	0.5	0.5		16	0.535714	0.535714		16	0.791667	0.791667		15	0.3	0.7		15	0.375	0.625		15	0.333333	0.666667						16	0.592593	0.592593		15	0.470588	0.529412		15	1	1
16	0.482759	0.517241		16	0.586207	0.586207		16	0.5	0.5		15	0	1		15	0.72	0.72		16	0.533333	0.533333						16	0.586207	0.586207		15	0.5	0.5		15	0.482759	0.517241
16	0.541667	0.541667		16	0.52	0.52		16	0.483871	0.516129		15	0.944444	0.944444		15	0.681818	0.681818		16	0.580645	0.580645						16	0.653846	0.653846		16	0.551724	0.551724		16	0.64	0.64
16	0.608696	0.608696		16	0.52	0.52		16	0.964286	0.964286		15	0.863636	0.863636		15	0	1		16	0.5	0.5						16	0.627907	0.627907		16	0.485714	0.514286		16	0.666667	0.666667
16	0.633333	0.633333		16	0.62963	0.62963		16	0.142857	0.857143		16	0.607143	0.607143		16	0.5	0.5		16	0.608696	0.608696						16	0.518519	0.518519		16	0.5	0.5		16	0.571429	0.571429
16	0.607143	0.607143		16	0.642857	0.642857		16	0.142857	0.857143		16	0.571429	0.571429		16	0.56	0.56		16	0.547619	0.547619						16	0.625	0.625		16	0.481481	0.518519		16	0.6	0.6
16	0.485714	0.514286		16	0.535714	0.535714		16	0.607143	0.607143		16	0.566667	0.566667		16	0.583333	0.583333		16	0.545455	0.545455						16	0.566667	0.566667		16	0.59375	0.59375		16	0.541667	0.541667
16	0.560976	0.560976		16	0.533333	0.533333		16	0.62069	0.62069		16	0.5	0.5		16	0.72	0.72		16	0.533333	0.533333						17	0.470588	0.529412		16	0.5625	0.5625		16	0.608696	0.608696
16	0.5	0.5		16	0.333333	0.666667		16	0.695652	0.695652		16	0.538462	0.538462		16	0.514286	0.514286		16	0.607143	0.607143						17	0.470588	0.529412		16	0.590909	0.590909		16	0.428571	0.571429
16	0.652174	0.652174		17	0.4375	0.5625		16	0.761905	0.761905		16	0.684211	0.684211		16	0.485714	0.514286		16	0.535714	0.535714						17	0.464286	0.535714		16	0.7	0.7		16	0.484848	0.515152
17	0.552632	0.552632		17	0.371429	0.628571		17	0.482759	0.517241		16	0.851852	0.851852		16	0.558824	0.558824		16	0.470588	0.529412						17	0.518519	0.518519		16	0.714286	0.714286		16	0.48	0.52
17	0.5	0.5		17	0.483871	0.516129		17	0.481481	0.518519		17	0.419355	0.580645		16	0.586957	0.586957		17	0.481481	0.518519						17	0.580645	0.580645		17	0.441176	0.558824		17	0.482759	0.517241
17	0.551724	0.551724		17	0.441176	0.558824		17	0.125	0.875		17	0.5	0.5		16	0.342857	0.657143		17	0.5	0.5						17	0.441176	0.558824		17	0.545455	0.545455		17	0.166667	0.833333
17	0.551724	0.551724		17	0.457143	0.542857		17	0.121951	0.878049		17	0.52	0.52		17	0.416667	0.583333		17	0.366667	0.633333						17	0.486486	0.513514		17	0.657143	0.657143		17	0.533333	0.533333
17	0.482759	0.517241		17	0.516129	0.516129		17	0.428571	0.571429		17	0.464286	0.535714		17	0.5	0.5		17	0.4375	0.5625						17	0.416667	0.583333		17	0.548387	0.548387		17	0.413793	0.586207
17	0.48	0.52		17	0.486486	0.513514		17	0.625	0.625		17	0.52	0.52		17	0.3	0.7		17	0.363636	0.636364						17	0.575758	0.575758		17	0.482759	0.517241		17	0.375	0.625
17	0.551724	0.551724		17	0.464286	0.535714		17	0.483871	0.516129		17	0.392857	0.607143		17	0.371429	0.628571		17	0.428571	0.571429						17	0.459459	0.540541		17	0.448276	0.551724		17	0.551724	0.551724
17	0.5	0.5		17	0.4375	0.5625		17	0.44	0.56		17	0.518519	0.518519		17	0.4375	0.5625		17	0.464286	0.535714						17	0.423077	0.576923		17	0.517241	0.517241		17	0.555556	0.555556
18	0.533333	0.533333		17	0.46875	0.53125		18	0.521739	0.521739		17	0.818182	0.818182		17	0.47619	0.52381		17	0.52	0.52						17	0.517241	0.517241		17	0.405405	0.594595		17	0.428571	0.571429
18	0.551724	0.551724		17	0.5625	0.5625		18	0.666667	0.666667		17	0.809524	0.809524		17	0.392857	0.607143		17	0.454545	0.545455						18	0.6	0.6		17	0.413793	0.586207		17	0.538462	0.538462
18	0.48	0.52		18	0.545455	0.545455		18	0.65	0.65		18	0.454545	0.545455		17	0.5	0.5		17	0.363636	0.636364						18	0.522727	0.522727		18	0.461538	0.538462		17	0.52381	0.52381
18	0.464286	0.535714		18	0.5625	0.5625		18	0.333333	0.666667		18	0.5	0.5		18	0.555556	0.555556		18	0.518519	0.518519						18	0.54	0.54		18	0.517241	0.517241		18	0.413793	0.586207
18	0.606061	0.606061		18	0.434783	0.565217		18	0.533333	0.533333		18	0.538462	0.538462		18	0.541667	0.541667		18	0.548387	0.548387						18	0.533333	0.533333		18	0.714286	0.714286		18	0.482759	0.517241
18	0.518519	0.518519		18	0.464286	0.535714		18	0.567568	0.567568		18	0.5	0.5		18	0.428571	0.571429		18	0.347826	0.652174						18	0.607143	0.607143		18	0.695652	0.695652		18	0.75	0.75
18	0.44	0.56		18	0.542857	0.542857		18	0.485714	0.514286		18	0.52	0.52		18	0.380952	0.619048		18	0.466667	0.533333						18	0.482759	0.517241		18	0.451613	0.548387		18	0.904762	0.904762
18	0.5	0.5		18	0.5	0.5		18	0.631579	0.631579		18	0.56	0.56		18	0.526316	0.526316		18	0.419355	0.580645						18	0.46875	0.53125		18	0.4375	0.5625		18	0.37037	0.62963
18	0.5	0.5		18	0.458333	0.541667		18	0.529412	0.529412		18	0.52381	0.52381		18	0.5	0.5		18	0.428571	0.571429						18	0.458333	0.541667		18	0.75	0.75		18	0.210526	0.789474
18	0.5	0.5		18	0.444444	0.555556		18	0.625	0.625		18	0.5	0.5		18	0.68	0.68		18	0.517241	0.517241						18	0.44	0.56		18	0.458333	0.541667		18	0	1
18	0.4	0.6		18	0.454545	0.545455		18	0.56	0.56		18	0.947368	0.947368		18	0.636364	0.636364		18	0.571429	0.571429						18	0.44	0.56		18	0.68	0.68		18	1	1
18	0.482759	0.517241		18	0.478261	0.521739		18	0.35	0.65		18	0.888889	0.888889		18	0.894737	0.894737		18	0.590909	0.590909						18	0.448276	0.551724		18	0.708333	0.708333		18	0.0952381	0.904762

## Sheet: RHL_homolat
Animal_ID	Baseline_rawPhase	Baseline_transPhase		Animal_ID	PreDox1_rawPhase	PreDox1_transPhase		Animal_ID	Dox1Day3_rawPhase	Dox1Day3_transPhase		Animal_ID	Dox1Day5_rawPhase	Dox1Day5_transPhase		Animal_ID	Dox1Day8_rawPhase	Dox1Day8_transPhase		Animal_ID	DoxOff_rawPhase	DoxOff_transPhase		Animal_ID	SugarCon_rawPhase	SugarCon_transPhase		Animal_ID	PreDox2_rawPhase	PreDox2_transPhase		Animal_ID	Dox2Day3_rawPhase	Dox2Day3_transPhase		Animal_ID	Dox2Day5_rawPhase	Dox2Day5_transPhase
1	0.647059	0.647059		1	0.545455	0.545455		1	0.580645	0.580645		1	0.0606061	0.939394		1	0.5	0.5		1	0.558824	0.558824		12	0.464286	0.535714		1	0.5	0.5		1	0.484848	0.515152		1	0.636364	0.636364
1	0.606061	0.606061		1	0.516129	0.516129		1	0.6	0.6		1	0.0357143	0.964286		1	0.5	0.5		1	0.527778	0.527778		12	0.52	0.52		1	0.558824	0.558824		1	0.903226	0.903226		1	0.621622	0.621622
1	0.558824	0.558824		1	0.527778	0.527778		1	0.551724	0.551724		1	0.5625	0.5625		1	0.428571	0.571429		1	0.516129	0.516129		12	0.545455	0.545455		1	0.516129	0.516129		1	0.527778	0.527778		1	0.571429	0.571429
1	0.594595	0.594595		1	0.464286	0.535714		1	0.48	0.52		1	0.518519	0.518519		1	0.516129	0.516129		1	0.607143	0.607143		12	0.5	0.5		1	0.5	0.5		1	0.5	0.5		1	0.55	0.55
1	0.485714	0.514286		1	0.464286	0.535714		1	0.454545	0.545455		1	0.548387	0.548387		1	0.540541	0.540541		1	0.5625	0.5625		12	0.555556	0.555556		1	0.5	0.5		1	0.533333	0.533333		1	0.548387	0.548387
1	0.518519	0.518519		1	0.433333	0.566667		1	0.482759	0.517241		1	0.515152	0.515152		1	0.529412	0.529412		1	0.540541	0.540541		12	0.535714	0.535714		1	0.588235	0.588235		1	0.515152	0.515152		1	0.613636	0.613636
1	0.533333	0.533333		2	0.53125	0.53125		2	0.411765	0.588235		1	0.545455	0.545455		1	0.548387	0.548387		1	0.529412	0.529412		13	0.5	0.5		1	0.583333	0.583333		1	0.5	0.5		1	0.592593	0.592593
1	0.612903	0.612903		2	0.555556	0.555556		2	0.46875	0.53125		1	0.515152	0.515152		1	0.511628	0.511628		1	0.5	0.5		13	0.535714	0.535714		1	0.46875	0.53125		1	0.466667	0.533333		1	0.551724	0.551724
1	0.483871	0.516129		2	0.545455	0.545455		2	0.464286	0.535714		1	0.551724	0.551724		1	0.52381	0.52381		1	0.585366	0.585366		13	0.464286	0.535714		1	0.5	0.5		2	0.517241	0.517241		2	0.466667	0.533333
2	0.677419	0.677419		2	0.441176	0.558824		2	0.464286	0.535714		1	0.62069	0.62069		1	0.511628	0.511628		1	0.516129	0.516129		13	0.628571	0.628571		2	0.5	0.5		2	0.535714	0.535714		2	0.553191	0.553191
2	0.628571	0.628571		2	0.464286	0.535714		2	0.444444	0.555556		2	0.551724	0.551724		2	0.56	0.56		1	0.59375	0.59375		13	0.5	0.5		2	0.533333	0.533333		2	0.52	0.52		2	0.533333	0.533333
2	0.645161	0.645161		2	0.464286	0.535714		2	0.461538	0.538462		2	0.516129	0.516129		2	0.625	0.625		2	0.538462	0.538462		13	0.529412	0.529412		2	0.52	0.52		2	0.515152	0.515152		2	0.513514	0.513514
2	0.481481	0.518519		2	0.586207	0.586207		2	0.416667	0.583333		2	0.435897	0.564103		2	0.444444	0.555556		2	0.535714	0.535714		14	0.571429	0.571429		2	0.675676	0.675676		2	0.5	0.5		2	0.516129	0.516129
2	0.5	0.5		7	0.5	0.5		2	0.423077	0.576923		2	0.5	0.5		2	0.5	0.5		2	0.5	0.5		14	0.551724	0.551724		2	0.5	0.5		2	0.444444	0.555556		2	0.571429	0.571429
2	0.533333	0.533333		7	0.533333	0.533333		2	0.5	0.5		2	0.485714	0.514286		2	0.518519	0.518519		2	0.470588	0.529412		14	0.535714	0.535714		2	0.487179	0.512821		2	0.5625	0.5625		2	0.521739	0.521739
2	0.517241	0.517241		7	0.59375	0.59375		7	0.482759	0.517241		2	0.487805	0.512195		2	0.366667	0.633333		2	0.611111	0.611111		14	0.5	0.5		2	0.6	0.6		2	0.470588	0.529412		2	0.518519	0.518519
2	0.541667	0.541667		7	0.463415	0.536585		7	0.46875	0.53125		2	0.542857	0.542857		2	0.521739	0.521739		2	0.433333	0.566667		14	0.576923	0.576923		2	0.454545	0.545455		7	0.538462	0.538462		7	0.53125	0.53125
2	0.5	0.5		7	0.52	0.52		7	0.5	0.5		2	0.592593	0.592593		2	0.5	0.5		2	0.5	0.5		14	0.566667	0.566667		2	0.666667	0.666667		7	0.606061	0.606061		7	0.5	0.5
2	0.678571	0.678571		7	0.5	0.5		7	0.730769	0.730769		2	0.485714	0.514286		2	0.5	0.5		2	0.642857	0.642857		14	0.551724	0.551724		2	0.628571	0.628571		7	0.586207	0.586207		7	0.482759	0.517241
7	0.677419	0.677419		7	0.466667	0.533333		7	0.461538	0.538462		2	0.428571	0.571429		7	0.571429	0.571429		7	0.515152	0.515152		14	0.5	0.5		7	0.485714	0.514286		7	0.612903	0.612903		7	0.566667	0.566667
7	0.5625	0.5625		7	0.538462	0.538462		7	0.580645	0.580645		7	0.516129	0.516129		7	0.517241	0.517241		7	0.538462	0.538462		15	0.625	0.625		7	0.472222	0.527778		7	0.375	0.625		7	0.535714	0.535714
7	0.652174	0.652174		7	0.535714	0.535714		7	0.484848	0.515152		7	0.482759	0.517241		7	0.534884	0.534884		7	0.653846	0.653846		15	0.576923	0.576923		7	0.53125	0.53125		7	0.441176	0.558824		7	0.615385	0.615385
7	0.56	0.56		7	0.5	0.5		7	0.487179	0.512821		7	0.648649	0.648649		7	0.513514	0.513514		7	0.54717	0.54717		15	0.517241	0.517241		7	0.62963	0.62963		7	0.571429	0.571429		7	0.451613	0.548387
7	0.571429	0.571429		7	0.419355	0.580645		8	0.5625	0.5625		7	0.382353	0.617647		7	0.567568	0.567568		7	0.531915	0.531915		15	0.518519	0.518519		7	0.526316	0.526316		7	0.56	0.56		7	0.5	0.5
7	0.56	0.56		7	0.535714	0.535714		8	0.594595	0.594595		7	0.604651	0.604651		7	0.606061	0.606061		7	0.514286	0.514286		15	0.655172	0.655172		7	0.480769	0.519231		7	0.52	0.52		7	0.590909	0.590909
7	0.545455	0.545455		8	0.741935	0.741935		8	0.53125	0.53125		7	0.564103	0.564103		7	0.472222	0.527778		7	0.548387	0.548387		15	0.538462	0.538462		7	0.518519	0.518519		7	0.636364	0.636364		7	0.482759	0.517241
8	0.65625	0.65625		8	0.5625	0.5625		8	0.592593	0.592593		7	0.594595	0.594595		7	0.416667	0.583333		7	0.516129	0.516129		15	0.6	0.6		7	0.466667	0.533333		8	0.466667	0.533333		8	0.571429	0.571429
8	0.514286	0.514286		8	0.583333	0.583333		8	0.535714	0.535714		7	0.540541	0.540541		8	0.525	0.525		7	0.564103	0.564103		15	0.548387	0.548387		8	0.62069	0.62069		8	0.516129	0.516129		8	0.576923	0.576923
8	0.566667	0.566667		8	0.484848	0.515152		8	0.484848	0.515152		7	0.617647	0.617647		8	0.6	0.6		7	0.651163	0.651163		15	0.481481	0.518519		8	0.53125	0.53125		8	0.5	0.5		8	0.48	0.52
8	0.4375	0.5625		8	0.5	0.5		8	0.621622	0.621622		7	0.461538	0.538462		8	0.464286	0.535714		7	0.518519	0.518519		16	0.555556	0.555556		8	0.590909	0.590909		8	0.482759	0.517241		8	0.542857	0.542857
8	0.517241	0.517241		8	0.551724	0.551724		8	0.606061	0.606061		7	0.533333	0.533333		8	0.59375	0.59375		8	0.6	0.6		16	0.533333	0.533333		8	0.6	0.6		8	0.606061	0.606061		8	0.538462	0.538462
9	0.576923	0.576923		8	0.62069	0.62069		8	0.578947	0.578947		8	0.675676	0.675676		8	0.461538	0.538462		8	0.638889	0.638889		16	0.657143	0.657143		8	0.6	0.6		8	0.5	0.5		8	0.56	0.56
9	0.566667	0.566667		8	0.6	0.6		8	0.525	0.525		8	0.548387	0.548387		8	0.581395	0.581395		8	0.517241	0.517241		16	0.571429	0.571429		8	0.48	0.52		8	0.52	0.52		8	0.5	0.5
9	0.538462	0.538462		9	0.571429	0.571429		9	0.529412	0.529412		8	0.565217	0.565217		8	0.555556	0.555556		8	0.606061	0.606061		16	0.608696	0.608696		8	0.5	0.5		8	0.48	0.52		9	0.583333	0.583333
9	0.533333	0.533333		9	0.612903	0.612903		9	0.555556	0.555556		8	0.592593	0.592593		8	0.512821	0.512821		8	0.612903	0.612903		16	0.545455	0.545455		8	0.59375	0.59375		8	0.5	0.5		9	0.625	0.625
9	0.666667	0.666667		9	0.5	0.5		9	0.710526	0.710526		8	0.645161	0.645161		8	0.514286	0.514286		8	0.536585	0.536585		16	0.6	0.6		9	0.444444	0.555556		9	0.52	0.52		9	0.368421	0.631579
9	0.542857	0.542857		9	0.566667	0.566667		9	0.538462	0.538462		8	0.607143	0.607143		8	0.516129	0.516129		8	0.473684	0.526316		17	0.541667	0.541667		9	0.5	0.5		9	0.565217	0.565217		9	0.5	0.5
9	0.652174	0.652174		9	0.517241	0.517241		9	0.576923	0.576923		8	0.571429	0.571429		9	0.6	0.6		8	0.71875	0.71875		17	0.6	0.6		9	0.5	0.5		9	0.5	0.5		9	0.481481	0.518519
9	0.592593	0.592593		9	0.551724	0.551724		9	0.5	0.5		8	0.454545	0.545455		9	0.535714	0.535714		8	0.541667	0.541667		17	0.481481	0.518519		9	0.52381	0.52381		9	0.517241	0.517241		9	0.529412	0.529412
10	0.730769	0.730769		9	0.592593	0.592593		9	0.454545	0.545455		8	0.46875	0.53125		9	0.466667	0.533333		9	0.545455	0.545455		17	0.558824	0.558824		9	0.5	0.5		9	0.571429	0.571429		9	0.619048	0.619048
10	0.666667	0.666667		10	0.576923	0.576923		9	0.6	0.6		9	0.518519	0.518519		9	0.473684	0.526316		9	0.478261	0.521739		17	0.512195	0.512195		9	0.459459	0.540541		9	0.451613	0.548387		9	0.526316	0.526316
10	0.62963	0.62963		10	0.583333	0.583333		9	0.6	0.6		9	0.56	0.56		9	0.5	0.5		9	0.59375	0.59375		17	0.444444	0.555556		9	0.708333	0.708333		9	0.608696	0.608696		9	0.575758	0.575758
10	0.583333	0.583333		10	0.538462	0.538462		9	0.555556	0.555556		9	0.55	0.55		9	0.428571	0.571429		9	0.551724	0.551724		18	0.521739	0.521739		10	0.541667	0.541667		9	0.677419	0.677419		9	0.473684	0.526316
10	0.708333	0.708333		10	0.636364	0.636364		10	0.53125	0.53125		9	0.52381	0.52381		9	0.555556	0.555556		9	0.558824	0.558824		18	0.545455	0.545455		10	0.590909	0.590909		9	0.55	0.55		10	0.607143	0.607143
10	0.608696	0.608696		10	0.5	0.5		10	0.592593	0.592593		9	0.45	0.55		9	0.62069	0.62069		9	0.6	0.6		18	0.5	0.5		10	0.608696	0.608696		9	0.526316	0.526316		10	0.666667	0.666667
10	0.541667	0.541667		10	0.625	0.625		10	0.518519	0.518519		9	0.565217	0.565217		9	0.411765	0.588235		9	0.655172	0.655172		18	0.565217	0.565217		10	0.444444	0.555556		10	0.545455	0.545455		10	0.454545	0.545455
12	0.69697	0.69697		10	0.653846	0.653846		10	0.517241	0.517241		9	0.545455	0.545455		9	0.571429	0.571429		9	0.555556	0.555556		18	0.571429	0.571429		12	0.555556	0.555556		10	0.45	0.55		10	0.578947	0.578947
12	0.586207	0.586207		10	0.555556	0.555556		10	0.545455	0.545455		9	0.481481	0.518519		10	0.52	0.52		9	0.6	0.6		18	0.571429	0.571429		12	0.555556	0.555556		10	0.45	0.55		10	0.555556	0.555556
12	0.633333	0.633333		10	0.518519	0.518519		10	0.56	0.56		9	0.482759	0.517241		10	0.7	0.7		10	0.551724	0.551724		18	0.64	0.64		12	0.551724	0.551724		10	0.5	0.5		10	0.473684	0.526316
12	0.580645	0.580645		10	0.6	0.6		10	0.521739	0.521739		9	0.5	0.5		10	0.52381	0.52381		10	0.583333	0.583333		18	0.565217	0.565217		12	0.533333	0.533333		10	0.446809	0.553191		10	0.619048	0.619048
12	0.5	0.5		10	0.636364	0.636364		10	0.55	0.55		10	0.583333	0.583333		10	0.583333	0.583333		10	0.6	0.6						12	0.566667	0.566667		10	0.5	0.5		10	0.52381	0.52381
12	0.64	0.64		10	0.681818	0.681818		10	0.5	0.5		10	0.583333	0.583333		10	0.625	0.625		10	0.6875	0.6875						12	0.517241	0.517241		10	0.45	0.55		10	0.526316	0.526316
12	0.484848	0.515152		12	0.555556	0.555556		10	0.590909	0.590909		10	0.5	0.5		10	0.6	0.6		10	0.487179	0.512821						12	0.478261	0.521739		10	0.666667	0.666667		10	0.45	0.55
12	0.545455	0.545455		12	0.580645	0.580645		10	0.47619	0.52381		10	0.542857	0.542857		10	0.619048	0.619048		10	0.628571	0.628571						12	0.555556	0.555556		10	0.625	0.625		12	0.583333	0.583333
12	0.607143	0.607143		12	0.545455	0.545455		10	0.434783	0.565217		10	0.7	0.7		10	0.684211	0.684211		10	0.416667	0.583333						12	0.5	0.5		10	0.533333	0.533333		12	0.619048	0.619048
12	0.551724	0.551724		12	0.541667	0.541667		10	0.461538	0.538462		10	0.590909	0.590909		10	0.578947	0.578947		10	0.636364	0.636364						13	0.675676	0.675676		12	0.689655	0.689655		12	0.615385	0.615385
13	0.516129	0.516129		12	0.652174	0.652174		12	0.555556	0.555556		10	0.666667	0.666667		12	0.55	0.55		10	0.583333	0.583333						13	0.558824	0.558824		12	0.538462	0.538462		12	0.458333	0.541667
13	0.558824	0.558824		12	0.608696	0.608696		12	0.538462	0.538462		10	0.571429	0.571429		12	0.538462	0.538462		10	0.56	0.56						13	0.595238	0.595238		12	0.5	0.5		12	0.571429	0.571429
13	0.571429	0.571429		12	0.655172	0.655172		12	0.68	0.68		10	0.404762	0.595238		12	0.608696	0.608696		12	0.538462	0.538462						13	0.638298	0.638298		12	0.521739	0.521739		12	0.571429	0.571429
13	0.607143	0.607143		12	0.677419	0.677419		12	0.470588	0.529412		10	0.555556	0.555556		12	0.458333	0.541667		12	0.521739	0.521739						13	0.5	0.5		12	0.545455	0.545455		12	0.45	0.55
13	0.541667	0.541667		12	0.628571	0.628571		12	0.5625	0.5625		12	0.541667	0.541667		12	0.434783	0.565217		12	0.5	0.5						13	0.5	0.5		12	0.56	0.56		12	0.478261	0.521739
13	0.541667	0.541667		12	0.5	0.5		12	0.7	0.7		12	0.625	0.625		12	0.611111	0.611111		12	0.566667	0.566667						13	0.483871	0.516129		12	0.478261	0.521739		12	0.458333	0.541667
13	0.409091	0.590909		13	0.545455	0.545455		13	0.571429	0.571429		12	0.6	0.6		12	0.62069	0.62069		12	0.585366	0.585366						13	0.5	0.5		12	0.380952	0.619048		12	0.55	0.55
13	0.466667	0.533333		13	0.538462	0.538462		13	0.5	0.5		12	0.55	0.55		12	0.681818	0.681818		12	0.483871	0.516129						13	0.518519	0.518519		12	0.458333	0.541667		13	0.571429	0.571429
13	0.538462	0.538462		13	0.571429	0.571429		13	0.516129	0.516129		12	0.611111	0.611111		12	0.609756	0.609756		12	0.636364	0.636364						13	0.521739	0.521739		13	0.5	0.5		13	0.548387	0.548387
13	0.444444	0.555556		13	0.666667	0.666667		13	0.518519	0.518519		12	0.555556	0.555556		12	0.666667	0.666667		12	0.6	0.6						13	0.5	0.5		13	0.428571	0.571429		13	0.5	0.5
14	0.510638	0.510638		13	0.466667	0.533333		13	0.5	0.5		12	0.560976	0.560976		13	0.448276	0.551724		12	0.653846	0.653846						13	0.451613	0.548387		13	0.416667	0.583333		13	0.538462	0.538462
14	0.632653	0.632653		13	0.521739	0.521739		13	0.464286	0.535714		12	0.6	0.6		13	0.5	0.5		13	0.586207	0.586207						14	0.59375	0.59375		13	0.424242	0.575758		13	0.545455	0.545455
14	0.586207	0.586207		13	0.607143	0.607143		13	0.411765	0.588235		12	0.56	0.56		13	0.692308	0.692308		13	0.548387	0.548387						14	0.684211	0.684211		13	0.5	0.5		13	0.571429	0.571429
14	0.592593	0.592593		13	0.612903	0.612903		13	0.529412	0.529412		13	0.583333	0.583333		13	0.647059	0.647059		13	0.518519	0.518519						14	0.633333	0.633333		13	0.428571	0.571429		13	0.571429	0.571429
14	0.521739	0.521739		13	0.6	0.6		13	0.533333	0.533333		13	0.576923	0.576923		13	0.538462	0.538462		13	0.533333	0.533333						14	0.65625	0.65625		13	0.518519	0.518519		13	0.545455	0.545455
14	0.55	0.55		13	0.542857	0.542857		14	0.53125	0.53125		13	0.590909	0.590909		13	0.551724	0.551724		13	0.521739	0.521739						14	0.541667	0.541667		13	0.555556	0.555556		13	0.583333	0.583333
14	0.5	0.5		14	0.6875	0.6875		14	0.62963	0.62963		13	0.6	0.6		13	0.538462	0.538462		13	0.5	0.5						14	0.62963	0.62963		13	0.486486	0.513514		13	0.48	0.52
14	0.655172	0.655172		14	0.666667	0.666667		14	0.625	0.625		13	0.52	0.52		13	0.612903	0.612903		13	0.71875	0.71875						14	0.611111	0.611111		13	0.428571	0.571429		14	0.576923	0.576923
14	0.645161	0.645161		14	0.689655	0.689655		14	0.518519	0.518519		13	0.631579	0.631579		14	0.6	0.6		13	0.518519	0.518519						14	0.576923	0.576923		14	0.642857	0.642857		14	0.478261	0.521739
14	0.55	0.55		14	0.62963	0.62963		14	0.55	0.55		14	0.612903	0.612903		14	0.592593	0.592593		14	0.615385	0.615385						14	0.5	0.5		14	0.606061	0.606061		14	0.565217	0.565217
14	0.5	0.5		14	0.62069	0.62069		14	0.52381	0.52381		14	0.606061	0.606061		14	0.454545	0.545455		14	0.551724	0.551724						15	0.651163	0.651163		14	0.607143	0.607143		14	0.565217	0.565217
14	0.590909	0.590909		14	0.56	0.56		14	0.56	0.56		14	0.56	0.56		14	0.478261	0.521739		14	0.5	0.5						15	0.697674	0.697674		14	0.571429	0.571429		14	0.47619	0.52381
15	0.558824	0.558824		14	0.666667	0.666667		14	0.625	0.625		14	0.651163	0.651163		14	0.517241	0.517241		14	0.541667	0.541667						15	0.651163	0.651163		14	0.517241	0.517241		14	0.47619	0.52381
15	0.575758	0.575758		14	0.64	0.64		14	0.558824	0.558824		14	0.526316	0.526316		14	0.464286	0.535714		14	0.684211	0.684211						15	0.625	0.625		14	0.633333	0.633333		14	0.545455	0.545455
15	0.615385	0.615385		14	0.538462	0.538462		14	0.607143	0.607143		14	0.636364	0.636364		14	0.482759	0.517241		14	0.564103	0.564103						15	0.512195	0.512195		14	0.481481	0.518519		14	0.458333	0.541667
15	0.538462	0.538462		15	0.575758	0.575758		15	0.481481	0.518519		14	0.545455	0.545455		14	0.590909	0.590909		14	0.541667	0.541667						15	0.607143	0.607143		14	0.533333	0.533333		14	0.65	0.65
15	0.472222	0.527778		15	0.555556	0.555556		15	0.565217	0.565217		14	0.583333	0.583333		14	0.555556	0.555556		14	0.551724	0.551724						15	0.6	0.6		14	0.666667	0.666667		15	0.521739	0.521739
15	0.545455	0.545455		15	0.451613	0.548387		15	0.428571	0.571429		14	0.653846	0.653846		14	0.576923	0.576923		15	0.541667	0.541667						15	0.5	0.5		14	0.520833	0.520833		15	0.5	0.5
15	0.44	0.56		15	0.631579	0.631579		15	0.478261	0.521739		15	0.518519	0.518519		15	0.521739	0.521739		15	0.5	0.5						15	0.533333	0.533333		15	0.517241	0.517241		15	0.65	0.65
15	0.409091	0.590909		15	0.666667	0.666667		15	0.483871	0.516129		15	0.608696	0.608696		15	0.5	0.5		15	0.583333	0.583333						15	0.535714	0.535714		15	0.484848	0.515152		15	0.380952	0.619048
15	0.52	0.52		15	0.545455	0.545455		15	0.484848	0.515152		15	0.47619	0.52381		15	0.409091	0.590909		15	0.487805	0.512195						15	0.538462	0.538462		15	0.619048	0.619048		15	0.421053	0.578947
15	0.5	0.5		15	0.521739	0.521739		15	0.473684	0.526316		15	0.47619	0.52381		15	0.47619	0.52381		15	0.575	0.575						16	0.6	0.6		15	0.5	0.5		15	0.529412	0.529412
15	0.617647	0.617647		15	0.586207	0.586207		15	0.35	0.65		15	0.5	0.5		15	0.526316	0.526316		15	0.483871	0.516129						16	0.62069	0.62069		15	0.571429	0.571429		15	0.45	0.55
16	0.695652	0.695652		15	0.5	0.5		16	0.625	0.625		15	0.484848	0.515152		15	0.56	0.56		15	0.44	0.56						16	0.75	0.75		15	0.65	0.65		15	0.4	0.6
16	0.666667	0.666667		16	0.642857	0.642857		16	0.583333	0.583333		15	0.5	0.5		15	0.5	0.5		15	0.5	0.5						16	0.592593	0.592593		15	0.470588	0.529412		15	0.611111	0.611111
16	0.62069	0.62069		16	0.62069	0.62069		16	0.535714	0.535714		15	0.0666667	0.933333		15	0.52	0.52		16	0.566667	0.566667						16	0.62069	0.62069		15	0.4375	0.5625		15	0.62069	0.62069
16	0.666667	0.666667		16	0.64	0.64		16	0.580645	0.580645		15	0.722222	0.722222		15	0.681818	0.681818		16	0.741935	0.741935						16	0.730769	0.730769		16	0.655172	0.655172		16	0.72	0.72
16	0.608696	0.608696		16	0.56	0.56		16	0.392857	0.607143		15	0.545455	0.545455		15	0.32	0.68		16	0.676471	0.676471						16	0.674419	0.674419		16	0.6	0.6		16	0.666667	0.666667
16	0.533333	0.533333		16	0.518519	0.518519		16	0.392857	0.607143		16	0.535714	0.535714		16	0.590909	0.590909		16	0.652174	0.652174						16	0.592593	0.592593		16	0.571429	0.571429		16	0.571429	0.571429
16	0.642857	0.642857		16	0.714286	0.714286		16	0.47619	0.52381		16	0.642857	0.642857		16	0.56	0.56		16	0.547619	0.547619						16	0.65625	0.65625		16	0.62963	0.62963		16	0.6	0.6
16	0.628571	0.628571		16	0.535714	0.535714		16	0.607143	0.607143		16	0.6	0.6		16	0.583333	0.583333		16	0.545455	0.545455						16	0.533333	0.533333		16	0.65625	0.65625		16	0.5	0.5
16	0.536585	0.536585		16	0.666667	0.666667		16	0.586207	0.586207		16	0.615385	0.615385		16	0.68	0.68		16	0.533333	0.533333						17	0.5	0.5		16	0.53125	0.53125		16	0.608696	0.608696
16	0.46875	0.53125		16	0.5	0.5		16	0.652174	0.652174		16	0.576923	0.576923		16	0.685714	0.685714		16	0.571429	0.571429						17	0.558824	0.558824		16	0.590909	0.590909		16	0.607143	0.607143
16	0.695652	0.695652		17	0.53125	0.53125		16	0.666667	0.666667		16	0.684211	0.684211		16	0.657143	0.657143		16	0.678571	0.678571						17	0.5	0.5		16	0.6	0.6		16	0.515152	0.515152
17	0.657895	0.657895		17	0.542857	0.542857		17	0.551724	0.551724		16	0.444444	0.555556		16	0.617647	0.617647		16	0.558824	0.558824						17	0.555556	0.555556		16	0.75	0.75		16	0.52	0.52
17	0.6	0.6		17	0.677419	0.677419		17	0.555556	0.555556		17	0.548387	0.548387		16	0.695652	0.695652		17	0.518519	0.518519						17	0.483871	0.516129		17	0.470588	0.529412		17	0.517241	0.517241
17	0.517241	0.517241		17	0.588235	0.588235		17	0.4375	0.5625		17	0.5	0.5		16	0.485714	0.514286		17	0.5	0.5						17	0.5	0.5		17	0.575758	0.575758		17	0.388889	0.611111
17	0.551724	0.551724		17	0.514286	0.514286		17	0.487805	0.512195		17	0.52	0.52		17	0.541667	0.541667		17	0.466667	0.533333						17	0.513514	0.513514		17	0.628571	0.628571		17	0.533333	0.533333
17	0.517241	0.517241		17	0.516129	0.516129		17	0.52381	0.52381		17	0.5	0.5		17	0.5	0.5		17	0.5625	0.5625						17	0.541667	0.541667		17	0.580645	0.580645		17	0.551724	0.551724
17	0.56	0.56		17	0.648649	0.648649		17	0.541667	0.541667		17	0.56	0.56		17	0.45	0.55		17	0.431818	0.568182						17	0.545455	0.545455		17	0.517241	0.517241		17	0.458333	0.541667
17	0.586207	0.586207		17	0.5	0.5		17	0.451613	0.548387		17	0.428571	0.571429		17	0.485714	0.514286		17	0.457143	0.542857						17	0.405405	0.594595		17	0.413793	0.586207		17	0.586207	0.586207
17	0.5	0.5		17	0.53125	0.53125		17	0.56	0.56		17	0.518519	0.518519		17	0.53125	0.53125		17	0.535714	0.535714						17	0.5	0.5		17	0.482759	0.517241		17	0.518519	0.518519
18	0.6	0.6		17	0.59375	0.59375		18	0.565217	0.565217		17	0.545455	0.545455		17	0.571429	0.571429		17	0.56	0.56						17	0.482759	0.517241		17	0.513514	0.513514		17	0.428571	0.571429
18	0.655172	0.655172		17	0.645833	0.645833		18	0.666667	0.666667		17	0.619048	0.619048		17	0.464286	0.535714		17	0.515152	0.515152						18	0.633333	0.633333		17	0.448276	0.551724		17	0.5	0.5
18	0.56	0.56		18	0.69697	0.69697		18	0.55	0.55		18	0.545455	0.545455		17	0.5	0.5		17	0.545455	0.545455						18	0.659091	0.659091		18	0.538462	0.538462		17	0.52381	0.52381
18	0.5	0.5		18	0.65625	0.65625		18	0.611111	0.611111		18	0.538462	0.538462		18	0.592593	0.592593		18	0.62963	0.62963						18	0.7	0.7		18	0.551724	0.551724		18	0.517241	0.517241
18	0.636364	0.636364		18	0.652174	0.652174		18	0.733333	0.733333		18	0.538462	0.538462		18	0.625	0.625		18	0.741935	0.741935						18	0.566667	0.566667		18	0.571429	0.571429		18	0.517241	0.517241
18	0.555556	0.555556		18	0.571429	0.571429		18	0.702703	0.702703		18	0.666667	0.666667		18	0.52381	0.52381		18	0.565217	0.565217						18	0.607143	0.607143		18	0.652174	0.652174		18	0.5	0.5
18	0.56	0.56		18	0.657143	0.657143		18	0.657143	0.657143		18	0.56	0.56		18	0.52381	0.52381		18	0.566667	0.566667						18	0.551724	0.551724		18	0.580645	0.580645		18	0.666667	0.666667
18	0.541667	0.541667		18	0.590909	0.590909		18	0.657895	0.657895		18	0.56	0.56		18	0.631579	0.631579		18	0.709677	0.709677						18	0.5625	0.5625		18	0.53125	0.53125		18	0.481481	0.518519
18	0.466667	0.533333		18	0.583333	0.583333		18	0.617647	0.617647		18	0.52381	0.52381		18	0.5	0.5		18	0.571429	0.571429						18	0.5	0.5		18	0.55	0.55		18	0.368421	0.631579
18	0.541667	0.541667		18	0.592593	0.592593		18	0.6875	0.6875		18	0.545455	0.545455		18	0.64	0.64		18	0.586207	0.586207						18	0.52	0.52		18	0.541667	0.541667		18	0.375	0.625
18	0.56	0.56		18	0.636364	0.636364		18	0.68	0.68		18	0.578947	0.578947		18	0.590909	0.590909		18	0.571429	0.571429						18	0.56	0.56		18	0.56	0.56		18	0.428571	0.571429
18	0.551724	0.551724		18	0.521739	0.521739		18	0.45	0.55		18	0.5	0.5		18	0.684211	0.684211		18	0.545455	0.545455						18	0.551724	0.551724		18	0.625	0.625		18	0.5	0.5

## Sheet: RHL_heterolat
Animal_ID	Baseline_rawPhase	Baseline_transPhase		Animal_ID	PreDox1_rawPhase	PreDox1_transPhase		Animal_ID	Dox1Day3_rawPhase	Dox1Day3_transPhase		Animal_ID	Dox1Day5_rawPhase	Dox1Day5_transPhase		Animal_ID	Dox1Day8_rawPhase	Dox1Day8_transPhase		Animal_ID	DoxOff_rawPhase	DoxOff_transPhase		Animal_ID	SugarCon_rawPhase	SugarCon_transPhase		Animal_ID	PreDox2_rawPhase	PreDox2_transPhase		Animal_ID	Dox2Day3_rawPhase	Dox2Day3_transPhase		Animal_ID	Dox2Day5_rawPhase	Dox2Day5_transPhase
1	0.117647	0.117647		1	0.030303	0.030303		1	0.0967742	0.0967742		1	0.575758	0.424242		1	0.441176	0.441176		1	0.970588	0.0294118		12	1	0		1	0.0277778	0.0277778		1	0	0		1	0.159091	0.159091
1	0.121212	0.121212		1	0.944444	0.0555556		1	0.1	0.1		1	0.607143	0.392857		1	0.5	0.5		1	0.0588235	0.0588235		12	0.04	0.04		1	0.117647	0.117647		1	0.555556	0.444444		1	0.0810811	0.0810811
1	0.0588235	0.0588235		1	0.111111	0.111111		1	1	0		1	0.0625	0.0625		1	1	0		1	0.0645161	0.0645161		12	0.969697	0.030303		1	0.0645161	0.0645161		1	0.9	0.1		1	0.0714286	0.0714286
1	0.0285714	0.0285714		1	1	0		1	0.909091	0.0909091		1	0.037037	0.037037		1	1	0		1	0.0357143	0.0357143		12	0.0357143	0.0357143		1	0	0		1	0.05	0		1	1	0
1	0.0857143	0.0857143		1	1	0		1	0.0909091	0.0909091		1	0.129032	0.129032		1	0.918919	0.0810811		1	0.972973	0.027027		12	0	0		1	0.0294118	0.0294118		1	0.133333	0.133333		1	0.193548	0.193548
1	0.0666667	0.0666667		1	0.966667	0.0333333		1	0	0		1	0.0909091	0.0909091		1	0	0		1	0.162162	0.162162		12	1	0		1	0.0294118	0.0294118		1	1	0		1	0.0227273	0.0227273
1	0.0333333	0.0333333		2	0	0		2	0.882353	0.117647		1	0.0606061	0.0606061		1	1	0		1	1	0		13	0.133333	0.133333		1	0.0833333	0.0833333		1	1	0		1	0.0740741	0.0740741
1	0.129032	0.129032		2	1	0		2	0.9375	0.0625		1	0.0909091	0.0909091		1	0.976744	0.0232558		1	0.0869565	0.0869565		13	0.142857	0.142857		1	0.03125	0.03125		1	1	0		1	0.137931	0.137931
1	0	0		2	0	0		2	0.0357143	0.0357143		1	0.206897	0.206897		1	0.119048	0.119048		1	0.219512	0.219512		13	0.0357143	0.0357143		1	0.0666667	0.0666667		2	0	0		2	0.933333	0.0666667
2	0.0967742	0.0967742		2	1	0		2	0.107143	0.107143		1	0.172414	0.172414		1	0.953488	0.0465116		1	0.0322581	0.0322581		13	0.114286	0.114286		2	1	0		2	0.0714286	0.0714286		2	0	0
2	0.171429	0.171429		2	0.964286	0.0357143		2	0.925926	0.0740741		2	0.0344828	0.0344828		2	0	0		1	0	0		13	0.1	0.1		2	0.933333	0.0666667		2	0	0		2	0.1	0.1
2	0.129032	0.129032		2	1	0		2	0.961538	0.0384615		2	0.0967742	0.0967742		2	1	0		2	0.928571	0.0714286		13	0.0588235	0.0588235		2	0.04	0.04		2	1	0		2	0.0810811	0.0810811
2	1	0		2	0.0344828	0.0344828		2	0.916667	0.0833333		2	0	0		2	1	0		2	0.178571	0.178571		14	0	0		2	0.135135	0.135135		2	0.972222	0.0277778		2	0.0322581	0.0322581
2	0.966667	0.0333333		7	0.0833333	0.0833333		2	0.923077	0.0769231		2	1	0		2	1	0		2	1	0		14	1	0		2	0.0681818	0.0681818		2	0.0833333	0.0833333		2	0.107143	0.107143
2	0	0		7	0.0333333	0.0333333		2	0.964286	0.0357143		2	0.0285714	0.0285714		2	0.962963	0.037037		2	0.941176	0.0588235		14	1	0		2	0.0512821	0.0512821		2	0.15625	0.15625		2	1	0
2	1	0		7	0.03125	0.03125		7	1	0		2	0.0243902	0.0243902		2	0.9	0.1		2	0.972222	0.0277778		14	0.0714286	0.0714286		2	0.0333333	0.0333333		2	0.941176	0.0588235		2	0.962963	0.037037
2	0.958333	0.0416667		7	0	0		7	0.90625	0.09375		2	0.228571	0.228571		2	0.0434783	0.0434783		2	0.966667	0.0333333		14	0.0384615	0.0384615		2	0	0		7	0.0384615	0.0384615		7	1	0
2	0.0322581	0.0322581		7	0.08	0.08		7	0.0384615	0.0384615		2	0.037037	0.037037		2	0	0		2	1	0		14	0.1	0.1		2	0.121212	0.121212		7	0.212121	0.212121		7	0.0789474	0.0789474
2	0.0357143	0.0357143		7	0.966667	0.0333333		7	0.115385	0.115385		2	0.942857	0.0571429		2	1	0		2	0.0357143	0.0357143		14	0.0689655	0.0689655		2	0.114286	0.114286		7	0.172414	0.172414		7	0.0689655	0.0689655
7	0.0967742	0.0967742		7	0.0333333	0.0333333		7	0.0384615	0.0384615		2	0.97619	0.0238095		7	0	0		7	0	0		14	0.884615	0.115385		7	1	0		7	0.225806	0.225806		7	0.0666667	0.0666667
7	0.125	0.125		7	0.0769231	0.0769231		7	0.16129	0.16129		7	0.967742	0.0322581		7	1	0		7	1	0		15	0.0416667	0.0416667		7	1	0		7	0.875	0.125		7	0.142857	0.142857
7	0.173913	0.173913		7	0.0714286	0.0714286		7	1	0		7	0	0		7	0.976744	0.0232558		7	0.0192308	0.0192308		15	0.0384615	0.0384615		7	0.09375	0.09375		7	0.941176	0.0588235		7	0.192308	0.192308
7	0.08	0.08		7	0.961538	0.0384615		7	0.282051	0.282051		7	0.852941	0.147059		7	0.108108	0.108108		7	0.132075	0.132075		15	0.172414	0.172414		7	0.148148	0.148148		7	0.142857	0.142857		7	0.967742	0.0322581
7	0.0952381	0.0952381		7	0.806452	0.193548		8	0.0625	0.0625		7	0.0294118	0.0294118		7	0.135135	0.135135		7	0.0425532	0.0425532		15	0.925926	0.0740741		7	0.0789474	0.0789474		7	0.16	0.16		7	0.153846	0.153846
7	0.12	0.12		7	1	0		8	0.0540541	0.0540541		7	0.976744	0.0232558		7	0.0909091	0.0909091		7	0.142857	0.142857		15	0	0		7	0.0576923	0.0576923		7	0.2	0.2		7	0.136364	0.136364
7	0	0		8	0.0322581	0.0322581		8	0.125	0.125		7	0.102564	0.102564		7	0.138889	0.138889		7	0.16129	0.16129		15	0.153846	0.153846		7	0.037037	0.037037		7	0.181818	0.181818		7	0.103448	0.103448
8	0.21875	0.21875		8	0.15625	0.15625		8	0.111111	0.111111		7	0.0540541	0.0540541		7	1	0		7	1	0		15	0.16	0.16		7	0.0333333	0.0333333		8	0.966667	0.0333333		8	0.142857	0.142857
8	0.142857	0.142857		8	0.0555556	0.0555556		8	1	0		7	0.027027	0.027027		8	0.9	0.1		7	0.0512821	0.0512821		15	0.96875	0.03125		8	0.9375	0.0625		8	0.935484	0.0645161		8	0.115385	0.115385
8	0.966667	0.0333333		8	0.972222	0.0277778		8	0.939394	0.0606061		7	0.147059	0.147059		8	0.0857143	0.0857143		7	0.162791	0.162791		15	0.962963	0.037037		8	0.15625	0.15625		8	0.0769231	0.0769231		8	1	0
8	0	0		8	0.0277778	0.0277778		8	0.027027	0.027027		7	0.0769231	0.0769231		8	0.964286	0.0357143		7	0	0		16	0.0740741	0.0740741		8	0.0909091	0.0909091		8	0	0		8	0.971429	0.0285714
8	0.931034	0.0689655		8	0.137931	0.137931		8	0.0909091	0.0909091		7	0.166667	0.166667		8	0.09375	0.09375		8	0.133333	0.133333		16	0.133333	0.133333		8	0.12	0.12		8	1	0		8	1	0
9	0.115385	0.115385		8	0.103448	0.103448		8	0.105263	0.105263		8	0.108108	0.108108		8	0.102564	0.102564		8	0.0555556	0.0555556		16	0.114286	0.114286		8	0.133333	0.133333		8	0.107143	0.107143		8	0.08	0.08
9	0.166667	0.166667		8	0.166667	0.166667		8	0.125	0.125		8	0.0967742	0.0967742		8	0.139535	0.139535		8	0.0344828	0.0344828		16	0.142857	0.142857		8	0.96	0.04		8	0.12	0.12		8	0.0384615	0.0384615
9	0.192308	0.192308		9	0.107143	0.107143		9	0.0294118	0.0294118		8	0.0434783	0.0434783		8	0.0555556	0.0555556		8	0.272727	0.272727		16	0.130435	0.130435		8	0.0833333	0.0833333		8	0.12	0.12		9	0.125	0.125
9	0.166667	0.166667		9	0.129032	0.129032		9	0.111111	0.111111		8	0.111111	0.111111		8	0.102564	0.102564		8	0.193548	0.193548		16	0.136364	0.136364		8	0.125	0.125		8	0.0454545	0.0454545		9	0.125	0.125
9	0.1	0.1		9	1	0		9	0.105263	0.105263		8	0.193548	0.193548		8	0.0571429	0.0571429		8	0.146341	0.146341		16	0.1	0.1		9	0.925926	0.0740741		9	1	0		9	0.315789	0.315789
9	0.171429	0.171429		9	1	0		9	0.0384615	0.0384615		8	0.178571	0.178571		8	0.0645161	0.0645161		8	1	0		17	0.0833333	0.0833333		9	1	0		9	0.0869565	0.0869565		9	0.375	0.375
9	0.0869565	0.0869565		9	0.0689655	0.0689655		9	0.0769231	0.0769231		8	0.171429	0.171429		9	0.08	0.08		8	0.09375	0.09375		17	0.08	0.08		9	0.05	0.05		9	0.25	0.25		9	0.925926	0.0740741
9	0.111111	0.111111		9	0.0689655	0.0689655		9	0.909091	0.0909091		8	0.0606061	0.0606061		9	0.0714286	0.0714286		8	1	0		17	1	0		9	0.047619	0.047619		9	0.794872	0.205128		9	0.294118	0.294118
10	0.153846	0.153846		9	0.037037	0.037037		9	0	0		8	0.9375	0.0625		9	0.866667	0.133333		9	1	0		17	1	0		9	0.227273	0.227273		9	0.190476	0.190476		9	0.380952	0.380952
10	0.148148	0.148148		10	0.115385	0.115385		9	0.0333333	0.0333333		9	1	0		9	0.684211	0.315789		9	1	0		17	1	0		9	0.0810811	0.0810811		9	0.870968	0.129032		9	0.184211	0.184211
10	0.111111	0.111111		10	0.0416667	0.0416667		9	0.0666667	0.0666667		9	0.12	0.12		9	0.791667	0.208333		9	0	0		17	0.962963	0.037037		9	0.125	0.125		9	0.130435	0.130435		9	0.151515	0.151515
10	0.125	0.125		10	0.192308	0.192308		9	0.0740741	0.0740741		9	1	0		9	0.714286	0.285714		9	1	0		18	0.0434783	0.0434783		10	0.958333	0.0416667		9	0.0967742	0.0967742		9	0.842105	0.157895
10	0.125	0.125		10	0.136364	0.136364		10	1	0		9	1	0		9	0.111111	0.111111		9	0.117647	0.117647		18	0.0909091	0.0909091		10	0	0		9	0.3	0.3		10	0.142857	0.142857
10	0.0869565	0.0869565		10	0.0384615	0.0384615		10	0.037037	0.037037		9	0.65	0.35		9	0.0689655	0.0689655		9	0.96	0.04		18	0.954545	0.0454545		10	0.130435	0.130435		9	0.973684	0.0263158		10	0.119048	0.119048
10	0.0416667	0.0416667		10	0	0		10	0.965517	0.0344828		9	0.782609	0.217391		9	0.411765	0.411765		9	0.137931	0.137931		18	0.130435	0.130435		10	0.888889	0.111111		10	0.863636	0.136364		10	0.181818	0.181818
12	0.121212	0.121212		10	0.0384615	0.0384615		10	0.0689655	0.0689655		9	0.227273	0.227273		9	0.47619	0.47619		9	0	0		18	0.047619	0.047619		12	0.037037	0.037037		10	0.95	0.05		10	0.315789	0.315789
12	0.0344828	0.0344828		10	0.0740741	0.0740741		10	0.0454545	0.0454545		9	0.814815	0.185185		10	0.92	0.08		9	1	0		18	0.142857	0.142857		12	0.037037	0.037037		10	0.85	0.15		10	0.333333	0.333333
12	0.1	0.1		10	0.148148	0.148148		10	0.2	0.2		9	0.896552	0.103448		10	0.05	0.05		10	0.103448	0.103448		18	0.16	0.16		12	0.103448	0.103448		10	0.708333	0.291667		10	0.578947	0.421053
12	0.0322581	0.0322581		10	0.2	0.2		10	0	0		9	0.933333	0.0666667		10	0.0952381	0.0952381		10	0.0833333	0.0833333		18	1	0		12	1	0		10	0.87234	0.12766		10	0.809524	0.190476
12	0.961538	0.0384615		10	0.227273	0.227273		10	1	0		10	0.0833333	0.0833333		10	0.25	0.25		10	1	0				1		12	0	0		10	0.277778	0.277778		10	0.333333	0.333333
12	0.12	0.12		10	0.272727	0.272727		10	0.125	0.125		10	0	0		10	0.166667	0.166667		10	0.0625	0.0625				1		12	1	0		10	0.35	0.35		10	0.421053	0.421053
12	0.0909091	0.0909091		12	0	0		10	0.136364	0.136364		10	0.0357143	0.0357143		10	0.95	0.05		10	0.0769231	0.0769231				1		12	0	0		10	0.5	0.5		10	0.35	0.35
12	0	0		12	1	0		10	0.952381	0.047619		10	0.171429	0.171429		10	0.380952	0.380952		10	0	0				1		12	1	0		10	0.208333	0.208333		12	0	0
12	0.0714286	0.0714286		12	0.0454545	0.0454545		10	0.782609	0.217391		10	0.25	0.25		10	0.368421	0.368421		10	1	0				1		12	1	0		10	0.2	0.2		12	0.142857	0.142857
12	0.137931	0.137931		12	0.0416667	0.0416667		10	0.807692	0.192308		10	0.272727	0.272727		10	0.315789	0.315789		10	0.0454545	0				1		13	0.189189	0.189189		12	0	0		12	0.923077	0.0769231
13	1	0		12	0.173913	0.173913		12	0.148148	0.148148		10	0.388889	0.388889		12	0.2	0.2		10	1	0				1		13	0.0882353	0.0882353		12	1	0		12	0.791667	0.208333
13	1	0		12	0.130435	0.130435		12	1	0		10	0.380952	0.380952		12	1	0		10	0	0				1		13	0.0714286	0.0714286		12	0.923077	0.0769231		12	0.0952381	0.0952381
13	0.928571	0.0714286		12	0.172414	0.172414		12	0.153846	0.153846		10	0.97619	0.0238095		12	0.0769231	0.0769231		12	0.961538	0.0384615				1		13	0.0851064	0.0851064		12	1	0		12	0.0952381	0.0952381
13	0.928571	0.0714286		12	0.129032	0.129032		12	0.794118	0.205882		10	0.111111	0.111111		12	0.916667	0.0833333		12	0.956522	0.0434783				1		13	0.0714286	0.0714286		12	1	0		12	0.7	0.3
13	0.916667	0.0833333		12	0.142857	0.142857		12	0.1875	0.1875		12	1	0		12	0.913043	0.0869565		12	0.846154	0.153846				1		13	0	0		12	0.04	0.04		12	0.826087	0.173913
13	0.916667	0.0833333		12	0.961538	0.0384615		12	0.2	0.2		12	0.125	0.125		12	0.0833333	0.0833333		12	1	0				1		13	1	0		12	0.0869565	0.0869565		12	0.666667	0.333333
13	0.909091	0.0909091		13	1	0		13	0.0357143	0.0357143		12	0.142857	0.142857		12	0.0689655	0.0689655		12	0.0731707	0.0731707				1		13	0.0333333	0.0333333		12	0.714286	0.285714		12	0.9	0.1
13	0.966667	0.0333333		13	1	0		13	0.133333	0.133333		12	0.125	0.125		12	0.136364	0.136364		12	0	0				1		13	0.111111	0.111111		12	0.958333	0.0416667		13	0.0714286	0.0714286
13	0.933333	0.0666667		13	0.178571	0.178571		13	0.0645161	0.0645161		12	0.0555556	0.0555556		12	0.170732	0.170732		12	1	0				1		13	0.0869565	0.0869565		13	0.928571	0.0714286		13	0.0322581	0.0322581
13	1	0		13	0.185185	0.185185		13	0	0		12	0.95122	0.0487805		12	0.153846	0.153846		12	0.1	0.1				1		13	0.0277778	0.0277778		13	0.964286	0.0357143		13	0.0416667	0.0416667
14	0.0851064	0.0851064		13	0.133333	0.133333		13	0	0		12	0.0487805	0.0487805		13	0.0344828	0.0344828		12	0.0384615	0.0384615				1		13	0	0		13	0.972222	0.0277778		13	0.230769	0.230769
14	0.183673	0.183673		13	0.173913	0.173913		13	0.142857	0.142857		12	0	0		13	0.142857	0.142857		13	0.0689655	0.0689655				1		14	0.0625	0.0625		13	0.0606061	0.0606061		13	0.227273	0.227273
14	0.172414	0.172414		13	0.142857	0.142857		13	0.852941	0.147059		12	1	0		13	0.153846	0.153846		13	0.16129	0.16129				1		14	0.105263	0.105263		13	0.964286	0.0357143		13	0.238095	0.238095
14	0.0740741	0.0740741		13	0.193548	0.193548		13	0.0882353	0.0882353		13	0.0416667	0.0416667		13	0.0588235	0.0588235		13	0	0				1		14	0.133333	0.133333		13	0.962963	0.037037		13	0.333333	0.333333
14	0.956522	0.0434783		13	0.133333	0.133333		13	0.0333333	0.0333333		13	0.153846	0.153846		13	0.115385	0.115385		13	1	0				1		14	0.125	0.125		13	0.0740741	0.0740741		13	0.318182	0.318182
14	0	0		13	0.0857143	0.0857143		14	0.03125	0.03125		13	0.136364	0.136364		13	0.0344828	0.0344828		13	0	0				1		14	0.916667	0.0833333		13	1	0		13	0.291667	0.291667
14	1	0		14	0.15625	0.15625		14	0.0740741	0.0740741		13	0.2	0.2		13	0.974359	0.025641		13	1	0				1		14	0	0		13	0.027027	0.027027		13	0.16	0.16
14	0.172414	0.172414		14	0.2	0.2		14	0	0		13	0	0		13	0.0769231	0.0769231		13	0	0				1		14	1	0		13	0.964286	0.0357143		14	1	0
14	0.16129	0.16129		14	0.172414	0.172414		14	1	0		13	0.105263	0.105263		14	0.08	0.08		13	1	0				1		14	0	0		14	0.0714286	0.0714286		14	0.956522	0.0434783
14	0.05	0.05		14	0.0740741	0.0740741		14	0	0		14	0.935484	0.0645161		14	0.111111	0.111111		14	0	0				1		14	1	0		14	0.0606061	0.0606061		14	1	0
14	1	0		14	0	0		14	1	0		14	0.151515	0.151515		14	0.818182	0.181818		14	1	0				1		15	0.162791	0.162791		14	0	0		14	0.956522	0.0434783
14	0.0909091	0.0909091		14	1	0		14	0.08	0.08		14	1	0		14	0.826087	0.173913		14	0.916667	0.0833333				1		15	0.209302	0.209302		14	1	0		14	0.761905	0.238095
15	0.0588235	0.0588235		14	0.111111	0.111111		14	0.166667	0.166667		14	0.0930233	0.0930233		14	0.965517	0.0344828		14	0.958333	0.0416667				1		15	0.232558	0.232558		14	1	0		14	0.809524	0.190476
15	0.0909091	0.0909091		14	0.12	0.12		14	0.0882353	0.0882353		14	0.0526316	0.0526316		14	0.892857	0.107143		14	0.105263	0.105263				1		15	0.0625	0.0625		14	0.0666667	0.0666667		14	0.916667	0.0833333
15	0.0384615	0.0384615		14	0.846154	0.153846		14	0.0357143	0.0357143		14	0.242424	0.242424		14	0.965517	0.0344828		14	0.102564	0.102564				1		15	0.097561	0.097561		14	0.925926	0.0740741		14	0	1
15	0.0384615	0.0384615		15	0.0909091	0.0909091		15	0.925926	0.0740741		14	0.0454545	0.0454545		14	0	0		14	0	0				1		15	0.0357143	0.0357143		14	0.966667	0.0333333		14	0.35	0.35
15	0.972222	0.0277778		15	0.111111	0.111111		15	0	0		14	0.0833333	0.0833333		14	0.037037	0.037037		14	1	0				1		15	0.0333333	0.0333333		14	0.047619	0.047619		15	1	0
15	1	0		15	0.0322581	0.0322581		15	0.214286	0.214286		14	0.115385	0.115385		14	0.0384615	0.0384615		15	0	0				1		15	0.03125	0.03125		14	0.0625	0.0625		15	0.928571	0.0714286
15	0.96	0.04		15	1	0		15	0.913043	0.0869565		15	1	0		15	0.923077	0.0769231		15	0.0416667	0.0416667				1		15	0	0		15	0.965517	0.0344828		15	0.2	0.2
15	0.954545	0.0454545		15	0.166667	0.166667		15	0.935484	0.0645161		15	0.0869565	0.0869565		15	0	0		15	0	0				1		15	0.0714286	0.0714286		15	0.030303	0.030303		15	0.47619	0.47619
15	0.96	0.04		15	0	0		15	0.193548	0.193548		15	0.857143	0.142857		15	0.272727	0.272727		15	1	0				1		15	0.0384615	0.0384615		15	0.142857	0.142857		15	0.263158	0.263158
15	0.0294118	0.0294118		15	1	0		15	0.789474	0.210526		15	0.809524	0.190476		15	0.285714	0.285714		15	0.0243902	0				1		16	0.1	0.1		15	0	0		15	0.294118	0.294118
15	0.0294118	0.0294118		15	0.103448	0.103448		15	0.65	0.35		15	1	0		15	0.315789	0.315789		15	0.935484	0.0645161				1		16	0.241379	0.241379		15	0.238095	0.238095		15	0.3	0.3
16	0.173913	0.173913		15	0.928571	0.0714286		16	0.25	0.25		15	1	0		15	0	0		15	0.88	0.12				1		16	0.285714	0.285714		15	0.25	0.25		15	0.3	0.3
16	0.0833333	0.0833333		16	0.178571	0.178571		16	0.166667	0.166667		15	1	0		15	1	0		15	0.916667	0.0833333				1		16	0.148148	0.148148		15	0.941176	0.0588235		15	0.333333	0.333333
16	0.206897	0.206897		16	0.172414	0.172414		16	0.967742	0.0322581		15	0.2	0.2		15	0.16	0.16		16	0.2	0.2				1		16	0.241379	0.241379		15	0.90625	0.09375		15	0	0
16	0.166667	0.166667		16	0.08	0.08		16	0.0322581	0.0322581		15	0.333333	0.333333		15	0.181818	0.181818		16	0.16129	0.16129				1		16	0.192308	0.192308		16	0.0689655	0.0689655		16	0.28	0.28
16	0.173913	0.173913		16	0.12	0.12		16	0.714286	0.285714		15	0.363636	0.363636		15	0.24	0.24		16	0.117647	0.117647				1		16	0.0930233	0.0930233		16	0.171429	0.171429		16	0.208333	0.208333
16	0.166667	0.166667		16	0.148148	0.148148		16	0.714286	0.285714		16	0.142857	0.142857		16	0.0454545	0.0454545		16	0.130435	0.130435				1		16	0.148148	0.148148		16	0.107143	0.107143		16	0.142857	0.142857
16	0.142857	0.142857		16	0.142857	0.142857		16	0.857143	0.142857		16	0.178571	0.178571		16	0.16	0.16		16	0.0714286	0.0714286				1		16	0.09375	0.09375		16	0.0740741	0.0740741		16	0.12	0.12
16	0.0857143	0.0857143		16	0.142857	0.142857		16	0.178571	0.178571		16	0.266667	0.266667		16	0.166667	0.166667		16	0.0909091	0.0909091				1		16	0	0		16	0.15625	0.15625		16	0.125	0.125
16	0	0		16	0.916667	0.0833333		16	0.172414	0.172414		16	0.0769231	0.0769231		16	0.2	0.2		16	0.166667	0.166667				1		17	0.970588	0.0294118		16	0.0625	0.0625		16	0.26087	0.26087
16	1	0		16	0.780488	0.219512		16	0.26087	0.26087		16	0.153846	0.153846		16	0.171429	0.171429		16	0.0714286	0.0714286				1		17	1	0		16	0.0454545	0.0454545		16	0.0357143	0.0357143
16	0.26087	0.26087		17	0	0		16	0.238095	0.238095		16	0.263158	0.263158		16	0.142857	0.142857		16	0.0357143	0.0357143				1		17	1	0		16	0.333333	0.333333		16	0.151515	0.151515
17	0.105263	0.105263		17	1	0		17	0.0344828	0.0344828		16	0.333333	0.333333		16	0.176471	0.176471		16	0.147059	0.147059				1		17	0.111111	0.111111		16	0.214286	0.214286		16	1	0
17	0.125	0.125		17	0.0322581	0.0322581		17	0.037037	0.037037		17	0.0322581	0.0322581		16	0.857143	0.142857		17	1	0				1		17	0.972973	0.027027		17	0.882353	0.117647		17	0.965517	0.0344828
17	0.0344828	0.0344828		17	0.0294118	0.0294118		17	0.6875	0.3125		17	0.0333333	0.0333333		16	0.0285714	0.0285714		17	0	0				1		17	0.970588	0.0294118		17	0.121212	0.121212		17	0.777778	0.222222
17	0.103448	0.103448		17	0.0285714	0.0285714		17	0.536585	0.463415		17	1	0		17	1	0		17	0.9	0.1				1		17	0.972973	0.027027		17	0.114286	0.114286		17	0	0
17	0.0344828	0.0344828		17	0.0645161	0.0645161		17	0.952381	0.047619		17	0.964286	0.0357143		17	0.961538	0.0384615		17	0.96875	0.03125				1		17	0.958333	0.0416667		17	0.0645161	0.0645161		17	1	0
17	0.04	0.04		17	0.108108	0.108108		17	0.208333	0.208333		17	0.04	0.04		17	0.9	0.1		17	1	0				1		17	0.864865	0.135135		17	1	0		17	0.833333	0.166667
17	0.206897	0.206897		17	1	0		17	0.870968	0.129032		17	0.857143	0.142857		17	0.914286	0.0857143		17	0.942857	0.0571429				1		17	0	0		17	1	0		17	0.103448	0.103448
17	0.96875	0.03125		17	0.0625	0.0625		17	0.0322581	0.0322581		17	1	0		17	0.9375	0.0625		17	0.964286	0.0357143				1		17	0.923077	0.0769231		17	0.965517	0.0344828		17	0.0740741	0.0740741
18	0.133333	0.133333		17	0.09375	0.09375		18	1	0		17	0.227273	0.227273		17	0	0		17	0	0				1		17	0.965517	0.0344828		17	0.972973	0.027027		17	0.928571	0.0714286
18	0.137931	0.137931		17	0.229167	0.229167		18	0.142857	0.142857		17	0.285714	0.285714		17	0.892857	0.107143		17	1	0				1		18	0.1	0.1		17	1	0		17	0.115385	0.115385
18	0	0		18	0.151515	0.151515		18	0.2	0.2		18	1	0		17	1	0		17	0.939394	0.0606061				1		18	0.159091	0.159091		18	0.0384615	0.0384615		17	1	0
18	0.892857	0.107143		18	0.0625	0.0625		18	0.944444	0.0555556		18	1	0		18	0.111111	0.111111		18	0.111111	0.111111				1		18	0.3	0.3		18	0.103448	0.103448		18	0.931034	0.0689655
18	0.181818	0.181818		18	0.0869565	0.0869565		18	0.166667	0.166667		18	0.115385	0.115385		18	0.0833333	0.0833333		18	0.290323	0.290323				1		18	0.133333	0.133333		18	0.142857	0.142857		18	1	0
18	1	0		18	1	0		18	0.162162	0.162162		18	0.125	0.125		18	1	0		18	0.966667	0.0333333				1		18	0.0714286	0.0714286		18	0.0869565	0.0869565		18	0.25	0.25
18	0.96	0.04		18	0.371429	0.371429		18	0	0		18	0.08	0.08		18	0.952381	0.047619		18	0.1	0.1				1		18	0.965517	0.0344828		18	1	0		18	0.333333	0.333333
18	1	0		18	0.0909091	0.0909091		18	0.236842	0.236842		18	0.16	0.16		18	0.0526316	0.0526316		18	0.0967742	0.0967742				1		18	0.09375	0.09375		18	0.96875	0.03125		18	0.925926	0.0740741
18	0.966667	0.0333333		18	1	0		18	0.0588235	0.0588235		18	0.047619	0.047619		18	0	0		18	0	0				1		18	1	0		18	0.2	0.2		18	0.736842	0.263158
18	0	0		18	0.0740741	0.0740741		18	0.28125	0.28125		18	0.0909091	0.0909091		18	0.16	0.16		18	0.137931	0.137931				1		18	0.96	0.04		18	0.958333	0.0416667		18	0.6875	0.3125
18	1	0		18	0.0454545	0.0454545		18	0.08	0.08		18	0.315789	0.315789		18	0.181818	0.181818		18	0.0952381	0.0952381				1		18	0.965517	0.0344828		18	0.2	0.2		18	0.571429	0.428571
18	1	0		18	0.0434783	0.0434783		18	0.95	0.05		18	0.277778	0.277778		18	0.368421	0.368421		18	0.0454545	0.0454545				1		18	0	0		18	0.125	0.125				1
