# Supplementary material for: Long ascending propriospinal neurons provide flexible, context-specific control of interlimb coordination
Source: eLife. 2020 Sep 9;9:e53565. doi: 10.7554/eLife.53565 (PMC7527236; doi:10.7554/eLife.53565)
Supplement: Figure 3—source data 1. [file elife-53565-fig3-data1.xlsx]

## Sheet: Con
animal_ID	side_ID	pass_ID	time_ID	trunk_angle
1	LHL	1	PreDox1	11.876
1	LHL	1	PreDox1	14.1146
1	LHL	1	PreDox1	13.0354
1	LHL	1	PreDox1	13.9395
1	LHL	1	PreDox1	15.9126
1	LHL	1	PreDox1	16.517
1	LHL	1	PreDox1	12.1838
1	LHL	1	PreDox1	14.8799
1	LHL	1	PreDox1	15.3122
1	LHL	1	PreDox1	15.4116
1	LHL	1	PreDox1	13.973
1	LHL	1	PreDox1	11.8735
1	LHL	1	PreDox1	9.60367
1	LHL	1	PreDox1	7.15031
1	LHL	1	PreDox1	8.86538
1	LHL	1	PreDox1	8.49951
1	LHL	1	PreDox1	7.3056
1	LHL	1	PreDox1	9.188
1	LHL	1	PreDox1	5.23146
1	LHL	1	PreDox1	4.10961
1	LHL	1	PreDox1	3.67695
1	LHL	1	PreDox1	8.07608
1	LHL	1	PreDox1	12.8532
1	LHL	1	PreDox1	6.37644
1	LHL	1	PreDox1	5.6887
1	LHL	1	PreDox1	8.73226
1	LHL	1	PreDox1	6.05556
1	LHL	1	PreDox1	7.68853
1	LHL	1	PreDox1	10.3948
1	LHL	1	PreDox1	15.9232
1	LHL	1	PreDox1	14.013
1	LHL	1	PreDox1	11.0657
1	LHL	1	PreDox1	11.4122
1	LHL	1	PreDox1	9.97639
1	LHL	1	PreDox1	6.96295
1	LHL	1	PreDox1	10.9178
1	LHL	1	PreDox1	9.31006
1	LHL	1	PreDox1	9.98144
1	LHL	1	PreDox1	13.8996
1	LHL	1	PreDox1	11.7274
1	LHL	1	PreDox1	6.614
1	LHL	1	PreDox1	6.97423
1	LHL	1	PreDox1	7.21858
1	LHL	1	PreDox1	5.95443
1	LHL	1	PreDox1	9.90607
1	LHL	1	PreDox1	11.9732
1	LHL	1	PreDox1	9.22722
1	LHL	1	PreDox1	8.89053
1	LHL	1	PreDox1	6.45993
1	LHL	1	PreDox1	5.80466
1	LHL	1	PreDox1	3.4759
1	LHL	1	PreDox1	2.5354
1	LHL	1	PreDox1	5.66572
1	LHL	1	PreDox1	6.36606
1	LHL	1	PreDox1	7.30931
1	LHL	1	PreDox1	6.28982
1	LHL	1	PreDox1	3.18235
1	LHL	1	PreDox1	2.43875
1	LHL	1	PreDox1	7.25533
1	LHL	1	PreDox1	4.65763
1	LHL	1	PreDox1	7.25533
1	LHL	1	PreDox1	5.00503
1	LHL	1	PreDox1	7.09771
1	LHL	1	PreDox1	4.20489
1	LHL	1	PreDox1	5.07869
1	LHL	1	PreDox1	7.36033
1	LHL	1	PreDox1	10.3401
1	LHL	1	PreDox1	8.76946
1	LHL	1	PreDox1	8.76946
1	LHL	1	PreDox1	8.13544
1	LHL	1	PreDox1	10.1856
1	LHL	1	PreDox1	13.1581
1	LHL	1	PreDox1	1.97391
1	LHL	1	PreDox1	9.35559
1	LHL	1	PreDox1	10.0323
1	LHL	1	PreDox1	14.6151
1	LHL	1	PreDox1	19.212
1	LHL	1	PreDox1	13.1679
1	LHL	1	PreDox1	8.33612
1	LHL	1	PreDox1	4.78665
1	LHL	1	PreDox1	8.76943
1	LHL	1	PreDox1	8.63495
1	LHL	1	PreDox1	11.0835
1	LHL	2	PreDox1	2.30881
1	LHL	2	PreDox1	5.06775
1	LHL	2	PreDox1	3.25761
1	LHL	2	PreDox1	3.06422
1	LHL	2	PreDox1	7.57653
1	LHL	2	PreDox1	6.49171
1	LHL	2	PreDox1	8.95874
1	LHL	2	PreDox1	4.95187
1	LHL	2	PreDox1	6.71699
1	LHL	2	PreDox1	4.08065
1	LHL	2	PreDox1	2.26113
1	LHL	2	PreDox1	3.7497
1	LHL	2	PreDox1	7.20275
1	LHL	2	PreDox1	13.7812
1	LHL	2	PreDox1	9.38157
1	LHL	2	PreDox1	9.0637
1	LHL	2	PreDox1	8.46051
1	LHL	2	PreDox1	9.50421
1	LHL	2	PreDox1	8.94185
1	LHL	2	PreDox1	12.814
1	LHL	2	PreDox1	11.864
1	LHL	2	PreDox1	8.58048
1	LHL	2	PreDox1	13.3485
1	LHL	2	PreDox1	6.3869
1	LHL	2	PreDox1	3.21803
1	LHL	2	PreDox1	0.634376
1	LHL	2	PreDox1	6.38419
1	LHL	2	PreDox1	10.4655
1	LHL	2	PreDox1	14.1667
1	LHL	2	PreDox1	9.31802
1	LHL	2	PreDox1	7.12947
1	LHL	2	PreDox1	5.0678
1	LHL	2	PreDox1	10.3182
1	LHL	2	PreDox1	9.78229
1	LHL	2	PreDox1	12.0321
1	LHL	2	PreDox1	12.8872
1	LHL	2	PreDox1	8.81309
1	LHL	2	PreDox1	5.05843
1	LHL	2	PreDox1	3.61523
1	LHL	2	PreDox1	1.19584
1	LHL	2	PreDox1	2.11109
1	LHL	2	PreDox1	5.88414
1	LHL	2	PreDox1	5.34645
1	LHL	2	PreDox1	5.80295
1	LHL	2	PreDox1	0.290211
1	LHL	2	PreDox1	7.01889
1	LHL	2	PreDox1	5.29163
1	LHL	2	PreDox1	5.80016
1	LHL	2	PreDox1	9.56799
1	LHL	2	PreDox1	7.5117
1	LHL	2	PreDox1	3.01369
1	LHL	2	PreDox1	2.2111
1	LHL	2	PreDox1	4.82068
1	LHL	2	PreDox1	4.46384
1	LHL	2	PreDox1	3.31066
1	LHL	2	PreDox1	6.91329
1	LHL	2	PreDox1	5.88726
1	LHL	2	PreDox1	4.88819
1	LHL	2	PreDox1	5.25629
1	LHL	2	PreDox1	3.46545
1	LHL	2	PreDox1	6.34995
1	LHL	2	PreDox1	4.75275
1	LHL	2	PreDox1	9.15587
1	LHL	2	PreDox1	12.8687
1	LHL	2	PreDox1	10.8927
1	LHL	2	PreDox1	8.16438
1	LHL	2	PreDox1	0.298139
1	LHL	2	PreDox1	0.316272
1	LHL	2	PreDox1	3.05495
1	LHL	2	PreDox1	5.64224
1	LHL	2	PreDox1	5.97429
1	LHL	2	PreDox1	10.1977
1	LHL	2	PreDox1	10.0206
1	LHL	2	PreDox1	3.51624
1	LHL	2	PreDox1	3.46184
1	LHL	2	PreDox1	4.88794
1	LHL	2	PreDox1	6.06112
1	LHL	2	PreDox1	6.81114
1	LHL	2	PreDox1	10.6402
1	LHL	2	PreDox1	7.73499
1	LHL	2	PreDox1	3.31057
1	LHL	2	PreDox1	0.608248
1	LHL	3	PreDox1	8.66845
1	LHL	3	PreDox1	7.4741
1	LHL	3	PreDox1	8.56704
1	LHL	3	PreDox1	7.75941
1	LHL	3	PreDox1	8.0368
1	LHL	3	PreDox1	8.37161
1	LHL	3	PreDox1	6.10371
1	LHL	3	PreDox1	6.96911
1	LHL	3	PreDox1	1.35091
1	LHL	3	PreDox1	1.68243
1	LHL	3	PreDox1	0.0631769
1	LHL	3	PreDox1	4.3287
1	LHL	3	PreDox1	4.19169
1	LHL	3	PreDox1	4.14509
1	LHL	3	PreDox1	5.1936
1	LHL	3	PreDox1	8.66149
1	LHL	3	PreDox1	11.6677
1	LHL	3	PreDox1	12.1083
1	LHL	3	PreDox1	9.50299
1	LHL	3	PreDox1	8.00608
1	LHL	3	PreDox1	5.95741
1	LHL	3	PreDox1	5.13579
1	LHL	3	PreDox1	7.21561
1	LHL	3	PreDox1	8.03685
1	LHL	3	PreDox1	5.75177
1	LHL	3	PreDox1	2.08812
1	LHL	3	PreDox1	3.79129
1	LHL	3	PreDox1	3.02467
1	LHL	3	PreDox1	7.05084
1	LHL	3	PreDox1	5.75155
1	LHL	3	PreDox1	2.83667
1	LHL	3	PreDox1	3.62357
1	LHL	3	PreDox1	5.38461
1	LHL	3	PreDox1	5.66615
1	LHL	3	PreDox1	8.77593
1	LHL	3	PreDox1	10.3583
1	LHL	3	PreDox1	7.84956
1	LHL	3	PreDox1	8.77598
1	LHL	3	PreDox1	8.13416
1	LHL	3	PreDox1	11.5161
1	LHL	3	PreDox1	10.9595
1	LHL	3	PreDox1	7.04843
1	LHL	3	PreDox1	5.25803
1	LHL	3	PreDox1	2.12728
1	LHL	3	PreDox1	1.99864
1	LHL	3	PreDox1	0.088255
1	LHL	3	PreDox1	1.36059
1	LHL	3	PreDox1	3.33674
1	LHL	3	PreDox1	3.43766
1	LHL	3	PreDox1	0.594294
1	LHL	3	PreDox1	0.594294
1	LHL	3	PreDox1	9.21672
1	LHL	3	PreDox1	4.64342
1	LHL	3	PreDox1	4.54176
1	LHL	3	PreDox1	4.54176
1	LHL	3	PreDox1	3.13466
1	LHL	3	PreDox1	3.77227
1	LHL	3	PreDox1	5.07254
1	LHL	3	PreDox1	4.43881
1	LHL	3	PreDox1	5.37644
1	LHL	3	PreDox1	2.96742
1	LHL	3	PreDox1	1.485
1	LHL	3	PreDox1	5.72501
1	LHL	3	PreDox1	6.55814
1	LHL	3	PreDox1	1.40096
1	LHL	3	PreDox1	4.54181
1	LHL	3	PreDox1	2.31631
1	LHL	3	PreDox1	5.51
1	LHL	3	PreDox1	6.22976
1	LHL	3	PreDox1	5.79877
1	LHL	3	PreDox1	5.9898
1	LHL	3	PreDox1	8.09036
1	LHL	3	PreDox1	8.95023
1	LHL	3	PreDox1	8.82911
1	LHL	3	PreDox1	8.54864
1	LHL	3	PreDox1	7.34494
1	LHL	3	PreDox1	7.57574
1	LHL	3	PreDox1	8.04143
1	LHL	3	PreDox1	6.93027
1	LHL	3	PreDox1	8.3345
1	LHL	3	PreDox1	7.13268
1	LHL	3	PreDox1	1.65884
1	LHL	3	PreDox1	5.79853
1	LHL	3	PreDox1	6.81384
1	LHL	3	PreDox1	7.92493
1	LHL	3	PreDox1	7.92491
1	LHL	3	PreDox1	7.3912
1	LHL	3	PreDox1	7.57574
1	LHL	3	PreDox1	8.41595
1	LHL	3	PreDox1	10.5929
1	RHL	1	PreDox1	11.5795
1	RHL	1	PreDox1	10.7826
1	RHL	1	PreDox1	7.70181
1	RHL	1	PreDox1	6.98504
1	RHL	1	PreDox1	5.92006
1	RHL	1	PreDox1	7.43127
1	RHL	1	PreDox1	8.80775
1	RHL	1	PreDox1	12.4703
1	RHL	1	PreDox1	16.3937
1	RHL	1	PreDox1	20.7032
1	RHL	1	PreDox1	19.6417
1	RHL	1	PreDox1	19.5274
1	RHL	1	PreDox1	21.9485
1	RHL	1	PreDox1	21.5879
1	RHL	1	PreDox1	20.791
1	RHL	1	PreDox1	21.2279
1	RHL	1	PreDox1	20.9822
1	RHL	1	PreDox1	21.7023
1	RHL	1	PreDox1	21.1809
1	RHL	1	PreDox1	20.2132
1	RHL	1	PreDox1	18.9666
1	RHL	1	PreDox1	17.173
1	RHL	1	PreDox1	16.049
1	RHL	1	PreDox1	21.5507
1	RHL	1	PreDox1	19.8683
1	RHL	1	PreDox1	21.0177
1	RHL	1	PreDox1	17.9199
1	RHL	1	PreDox1	16.8615
1	RHL	1	PreDox1	18.9293
1	RHL	1	PreDox1	17.2689
1	RHL	1	PreDox1	14.0652
1	RHL	1	PreDox1	11.5502
1	RHL	1	PreDox1	12.8069
1	RHL	1	PreDox1	13.8962
1	RHL	1	PreDox1	8.7969
1	RHL	1	PreDox1	4.4148
1	RHL	1	PreDox1	7.88343
1	RHL	1	PreDox1	4.60058
1	RHL	1	PreDox1	8.0921
1	RHL	1	PreDox1	11.5482
1	RHL	1	PreDox1	12.257
1	RHL	1	PreDox1	13.3379
1	RHL	1	PreDox1	15.2584
1	RHL	1	PreDox1	13.2121
1	RHL	1	PreDox1	16.9502
1	RHL	1	PreDox1	17.6346
1	RHL	1	PreDox1	10.5754
1	RHL	1	PreDox1	11.2978
1	RHL	1	PreDox1	12.013
1	RHL	1	PreDox1	12.7347
1	RHL	1	PreDox1	9.02464
1	RHL	1	PreDox1	1.12604
1	RHL	1	PreDox1	2.1447
1	RHL	1	PreDox1	3.1308
1	RHL	1	PreDox1	0.0400398
1	RHL	1	PreDox1	5.82306
1	RHL	1	PreDox1	7.84262
1	RHL	1	PreDox1	9.71693
1	RHL	1	PreDox1	9.56416
1	RHL	1	PreDox1	10.4545
1	RHL	1	PreDox1	11.1645
1	RHL	1	PreDox1	11.5767
1	RHL	1	PreDox1	9.19088
1	RHL	1	PreDox1	9.26199
1	RHL	1	PreDox1	9.96389
1	RHL	1	PreDox1	7.62392
1	RHL	1	PreDox1	8.6537
1	RHL	2	PreDox1	5.43531
1	RHL	2	PreDox1	1.06017
1	RHL	2	PreDox1	1.16078
1	RHL	2	PreDox1	2.73997
1	RHL	2	PreDox1	7.5625
1	RHL	2	PreDox1	6.91608
1	RHL	2	PreDox1	9.92648
1	RHL	2	PreDox1	13.4826
1	RHL	2	PreDox1	11.7774
1	RHL	2	PreDox1	11.5984
1	RHL	2	PreDox1	12.6277
1	RHL	2	PreDox1	16.8557
1	RHL	2	PreDox1	14.6057
1	RHL	2	PreDox1	14.43
1	RHL	2	PreDox1	9.39322
1	RHL	2	PreDox1	11.2939
1	RHL	2	PreDox1	12.0263
1	RHL	2	PreDox1	9.96415
1	RHL	2	PreDox1	8.60274
1	RHL	2	PreDox1	6.08899
1	RHL	2	PreDox1	4.91771
1	RHL	2	PreDox1	5.41526
1	RHL	2	PreDox1	6.48743
1	RHL	2	PreDox1	9.7338
1	RHL	2	PreDox1	14.1832
1	RHL	2	PreDox1	18.4608
1	RHL	2	PreDox1	23.4014
1	RHL	2	PreDox1	20.3266
1	RHL	2	PreDox1	18.101
1	RHL	2	PreDox1	18.9708
1	RHL	2	PreDox1	20.1487
1	RHL	2	PreDox1	17.5985
1	RHL	2	PreDox1	17.3212
1	RHL	2	PreDox1	18.2885
1	RHL	2	PreDox1	18.7035
1	RHL	2	PreDox1	18.3005
1	RHL	2	PreDox1	18.3684
1	RHL	2	PreDox1	17.3784
1	RHL	2	PreDox1	15.8401
1	RHL	2	PreDox1	11.3955
1	RHL	2	PreDox1	7.19201
1	RHL	2	PreDox1	12.6625
1	RHL	2	PreDox1	13.2332
1	RHL	2	PreDox1	13.0132
1	RHL	2	PreDox1	10.9592
1	RHL	2	PreDox1	14.2527
1	RHL	2	PreDox1	17.4083
1	RHL	2	PreDox1	12.8449
1	RHL	2	PreDox1	11.4489
1	RHL	2	PreDox1	13.6817
1	RHL	2	PreDox1	11.0349
1	RHL	2	PreDox1	11.3335
1	RHL	2	PreDox1	12.1829
1	RHL	2	PreDox1	7.54979
1	RHL	2	PreDox1	6.27832
1	RHL	2	PreDox1	4.27325
1	RHL	2	PreDox1	4.84675
1	RHL	2	PreDox1	4.72768
1	RHL	2	PreDox1	7.20568
1	RHL	2	PreDox1	10.0875
1	RHL	2	PreDox1	10.2319
1	RHL	2	PreDox1	12.4815
1	RHL	2	PreDox1	13.3581
1	RHL	2	PreDox1	10.2191
1	RHL	2	PreDox1	11.5198
1	RHL	2	PreDox1	12.7441
1	RHL	2	PreDox1	11.6692
1	RHL	2	PreDox1	9.79964
1	RHL	2	PreDox1	8.10013
1	RHL	2	PreDox1	9.40561
1	RHL	2	PreDox1	10.1867
1	RHL	2	PreDox1	8.6041
1	RHL	2	PreDox1	9.8135
1	RHL	2	PreDox1	6.74939
1	RHL	2	PreDox1	1.82657
1	RHL	2	PreDox1	4.28602
1	RHL	2	PreDox1	2.9809
1	RHL	2	PreDox1	5.42312
1	RHL	2	PreDox1	7.52798
1	RHL	2	PreDox1	10.5298
1	RHL	2	PreDox1	11.8315
1	RHL	2	PreDox1	15.7219
1	RHL	2	PreDox1	11.4405
1	RHL	2	PreDox1	10.523
1	RHL	2	PreDox1	13.2587
1	RHL	2	PreDox1	12.6358
1	RHL	2	PreDox1	10.6886
1	RHL	2	PreDox1	7.36404
1	RHL	2	PreDox1	5.06392
1	RHL	2	PreDox1	8.88369
1	RHL	2	PreDox1	7.82259
1	RHL	2	PreDox1	6.15509
1	RHL	2	PreDox1	3.52459
1	RHL	2	PreDox1	0.349976
1	RHL	2	PreDox1	0.613669
1	RHL	2	PreDox1	3.18831
1	RHL	2	PreDox1	2.01382
1	RHL	2	PreDox1	6.09819
1	RHL	2	PreDox1	13.5989
1	RHL	2	PreDox1	11.6489
1	RHL	2	PreDox1	11.9408
1	RHL	2	PreDox1	10.4758
1	RHL	2	PreDox1	12.9713
1	RHL	2	PreDox1	11.9377
1	RHL	2	PreDox1	7.36788
1	RHL	2	PreDox1	7.94952
1	RHL	2	PreDox1	8.20362
1	RHL	2	PreDox1	8.23411
1	RHL	2	PreDox1	6.76275
1	RHL	2	PreDox1	5.14197
1	RHL	2	PreDox1	1.12373
1	RHL	2	PreDox1	0.723113
1	RHL	2	PreDox1	1.35388
1	RHL	2	PreDox1	0.958061
1	RHL	2	PreDox1	1.52554
1	RHL	3	PreDox1	12.4614
1	RHL	3	PreDox1	12.1715
1	RHL	3	PreDox1	6.53055
1	RHL	3	PreDox1	8.12389
1	RHL	3	PreDox1	3.01074
1	RHL	3	PreDox1	3.02941
1	RHL	3	PreDox1	6.73581
1	RHL	3	PreDox1	9.54917
1	RHL	3	PreDox1	10.2777
1	RHL	3	PreDox1	10.5845
1	RHL	3	PreDox1	8.13826
1	RHL	3	PreDox1	10.3001
1	RHL	3	PreDox1	17.0915
1	RHL	3	PreDox1	13.0586
1	RHL	3	PreDox1	11.7357
1	RHL	3	PreDox1	10.331
1	RHL	3	PreDox1	9.96665
1	RHL	3	PreDox1	11.7733
1	RHL	3	PreDox1	13.6868
1	RHL	3	PreDox1	11.9255
1	RHL	3	PreDox1	7.32889
1	RHL	3	PreDox1	6.97425
1	RHL	3	PreDox1	10.2502
1	RHL	3	PreDox1	8.12135
1	RHL	3	PreDox1	8.78547
1	RHL	3	PreDox1	8.72645
1	RHL	3	PreDox1	10.2117
1	RHL	3	PreDox1	14.7646
1	RHL	3	PreDox1	14.0298
1	RHL	3	PreDox1	11.5785
1	RHL	3	PreDox1	11.9267
1	RHL	3	PreDox1	11.6266
1	RHL	3	PreDox1	13.3932
1	RHL	3	PreDox1	11.4798
1	RHL	3	PreDox1	10.3307
1	RHL	3	PreDox1	9.27198
1	RHL	3	PreDox1	10.9123
1	RHL	3	PreDox1	11.0467
1	RHL	3	PreDox1	7.49938
1	RHL	3	PreDox1	3.79612
1	RHL	3	PreDox1	3.68318
1	RHL	3	PreDox1	2.39008
1	RHL	3	PreDox1	1.8401
1	RHL	3	PreDox1	5.78777
1	RHL	3	PreDox1	5.85078
1	RHL	3	PreDox1	8.08797
1	RHL	3	PreDox1	9.87007
1	RHL	3	PreDox1	11.2888
1	RHL	3	PreDox1	7.75022
1	RHL	3	PreDox1	8.36547
1	RHL	3	PreDox1	13.4199
1	RHL	3	PreDox1	4.50924
1	RHL	3	PreDox1	6.36638
1	RHL	3	PreDox1	6.57956
1	RHL	3	PreDox1	7.33771
1	RHL	3	PreDox1	7.173
1	RHL	3	PreDox1	5.64677
1	RHL	3	PreDox1	1.40494
1	RHL	3	PreDox1	0.965848
1	RHL	3	PreDox1	0.292176
1	RHL	3	PreDox1	0.811845
1	RHL	3	PreDox1	3.64374
1	RHL	3	PreDox1	6.18961
1	RHL	3	PreDox1	8.66782
1	RHL	3	PreDox1	8.66782
1	RHL	3	PreDox1	10.502
1	RHL	3	PreDox1	8.4955
1	RHL	3	PreDox1	9.98044
1	RHL	3	PreDox1	10.5069
1	RHL	3	PreDox1	11.4343
1	RHL	3	PreDox1	9.13559
1	RHL	3	PreDox1	5.61698
1	RHL	3	PreDox1	6.81798
1	RHL	3	PreDox1	8.39255
1	RHL	3	PreDox1	9.65864
1	RHL	3	PreDox1	8.65984
1	RHL	3	PreDox1	5.57835
1	RHL	3	PreDox1	7.33829
1	RHL	3	PreDox1	5.84315
1	RHL	3	PreDox1	5.52684
1	RHL	3	PreDox1	9.61639
1	RHL	3	PreDox1	10.6188
1	RHL	3	PreDox1	13.8633
1	RHL	3	PreDox1	18.7269
1	RHL	3	PreDox1	18.711
1	RHL	3	PreDox1	18.6273
1	RHL	3	PreDox1	16.6184
1	RHL	3	PreDox1	20.3303
1	RHL	3	PreDox1	17.966
1	RHL	3	PreDox1	14.1065
1	RHL	3	PreDox1	14.3157
1	RHL	3	PreDox1	12.3055
1	RHL	3	PreDox1	12.9372
1	RHL	3	PreDox1	8.76691
1	RHL	3	PreDox1	3.60483
1	RHL	3	PreDox1	2.17002
1	RHL	3	PreDox1	1.01956
1	RHL	3	PreDox1	2.23261
1	RHL	3	PreDox1	3.4119
1	RHL	3	PreDox1	4.75284
2	LHL	1	PreDox1	28.891
2	LHL	1	PreDox1	28.9436
2	LHL	1	PreDox1	25.4199
2	LHL	1	PreDox1	22.1833
2	LHL	1	PreDox1	16.7743
2	LHL	1	PreDox1	19.4957
2	LHL	1	PreDox1	22.0148
2	LHL	1	PreDox1	21.2922
2	LHL	1	PreDox1	17.2769
2	LHL	1	PreDox1	17.8636
2	LHL	1	PreDox1	16.9105
2	LHL	1	PreDox1	14.6893
2	LHL	1	PreDox1	17.1861
2	LHL	1	PreDox1	18.1789
2	LHL	1	PreDox1	18.2648
2	LHL	1	PreDox1	16.3362
2	LHL	1	PreDox1	16.4832
2	LHL	1	PreDox1	21.3929
2	LHL	1	PreDox1	26.0342
2	LHL	1	PreDox1	28.8275
2	LHL	1	PreDox1	27.5994
2	LHL	1	PreDox1	25.6104
2	LHL	1	PreDox1	29.3365
2	LHL	1	PreDox1	28.8871
2	LHL	1	PreDox1	24.3321
2	LHL	1	PreDox1	25.0224
2	LHL	1	PreDox1	26.4411
2	LHL	1	PreDox1	19.8616
2	LHL	1	PreDox1	18.0973
2	LHL	1	PreDox1	19.8263
2	LHL	1	PreDox1	18.6165
2	LHL	1	PreDox1	18.0973
2	LHL	1	PreDox1	22.7855
2	LHL	1	PreDox1	17.6895
2	LHL	1	PreDox1	20.5534
2	LHL	1	PreDox1	19.3612
2	LHL	1	PreDox1	20.7058
2	LHL	1	PreDox1	25.3013
2	LHL	1	PreDox1	20.185
2	LHL	1	PreDox1	21.4918
2	LHL	1	PreDox1	21.9985
2	LHL	1	PreDox1	14.1279
2	LHL	1	PreDox1	16.1341
2	LHL	1	PreDox1	14.8438
2	LHL	1	PreDox1	18.9963
2	LHL	1	PreDox1	17.1256
2	LHL	1	PreDox1	18.9957
2	LHL	1	PreDox1	19.9505
2	LHL	1	PreDox1	22.0163
2	LHL	1	PreDox1	21.2874
2	LHL	1	PreDox1	20.3159
2	LHL	1	PreDox1	18.2242
2	LHL	1	PreDox1	18.4987
2	LHL	1	PreDox1	21.7306
2	LHL	1	PreDox1	21.4514
2	LHL	1	PreDox1	20.2562
2	LHL	1	PreDox1	18.3773
2	LHL	1	PreDox1	21.4856
2	LHL	1	PreDox1	27.7595
2	LHL	1	PreDox1	26.0921
2	LHL	1	PreDox1	26.6078
2	LHL	1	PreDox1	27.3872
2	LHL	1	PreDox1	26.2027
2	LHL	1	PreDox1	23.9129
2	LHL	1	PreDox1	25.062
2	LHL	1	PreDox1	23.7654
2	LHL	1	PreDox1	21.7131
2	LHL	1	PreDox1	21.9007
2	LHL	1	PreDox1	17.8363
2	LHL	1	PreDox1	15.1428
2	LHL	1	PreDox1	16.2242
2	LHL	1	PreDox1	17.4506
2	LHL	1	PreDox1	25.8732
2	LHL	1	PreDox1	31.2231
2	LHL	1	PreDox1	28.3691
2	LHL	1	PreDox1	24.0187
2	LHL	1	PreDox1	24.3279
2	LHL	1	PreDox1	21.1946
2	LHL	1	PreDox1	15.8017
2	LHL	2	PreDox1	6.65418
2	LHL	2	PreDox1	7.95482
2	LHL	2	PreDox1	8.28299
2	LHL	2	PreDox1	8.28298
2	LHL	2	PreDox1	14.9907
2	LHL	2	PreDox1	16.6006
2	LHL	2	PreDox1	11.2575
2	LHL	2	PreDox1	12.7544
2	LHL	2	PreDox1	17.1707
2	LHL	2	PreDox1	12.3873
2	LHL	2	PreDox1	14.2677
2	LHL	2	PreDox1	12.3873
2	LHL	2	PreDox1	10.7592
2	LHL	2	PreDox1	9.69494
2	LHL	2	PreDox1	11.2051
2	LHL	2	PreDox1	9.9517
2	LHL	2	PreDox1	12.2123
2	LHL	2	PreDox1	11.1952
2	LHL	2	PreDox1	10.2391
2	LHL	2	PreDox1	9.53485
2	LHL	2	PreDox1	8.57959
2	LHL	2	PreDox1	12.3601
2	LHL	2	PreDox1	9.57933
2	LHL	2	PreDox1	8.69604
2	LHL	2	PreDox1	9.40347
2	LHL	2	PreDox1	11.6526
2	LHL	2	PreDox1	15.7353
2	LHL	2	PreDox1	10.0828
2	LHL	2	PreDox1	12.4324
2	LHL	2	PreDox1	11.5933
2	LHL	2	PreDox1	7.52239
2	LHL	2	PreDox1	1.70273
2	LHL	2	PreDox1	3.665
2	LHL	2	PreDox1	12.2029
2	LHL	2	PreDox1	8.88231
2	LHL	2	PreDox1	11.298
2	LHL	2	PreDox1	11.5128
2	LHL	2	PreDox1	13.2425
2	LHL	2	PreDox1	9.49
2	LHL	2	PreDox1	5.10959
2	LHL	2	PreDox1	8.40075
2	LHL	2	PreDox1	12.8061
2	LHL	2	PreDox1	12.4795
2	LHL	2	PreDox1	8.56082
2	LHL	2	PreDox1	6.31623
2	LHL	2	PreDox1	4.04944
2	LHL	2	PreDox1	7.87199
2	LHL	2	PreDox1	7.36913
2	LHL	2	PreDox1	5.04387
2	LHL	2	PreDox1	7.45485
2	LHL	2	PreDox1	10.0399
2	LHL	2	PreDox1	12.7259
2	LHL	2	PreDox1	11.557
2	LHL	2	PreDox1	8.72056
2	LHL	2	PreDox1	4.23804
2	LHL	2	PreDox1	4.95464
2	LHL	2	PreDox1	6.48929
2	LHL	2	PreDox1	4.37713
2	LHL	2	PreDox1	4.57787
2	LHL	2	PreDox1	4.55902
2	LHL	2	PreDox1	6.08889
2	LHL	2	PreDox1	3.14536
2	LHL	2	PreDox1	3.21196
2	LHL	2	PreDox1	2.79031
2	LHL	2	PreDox1	0.0907244
2	LHL	2	PreDox1	1.76519
2	LHL	2	PreDox1	0.0748496
2	LHL	2	PreDox1	0.921995
2	LHL	2	PreDox1	2.49078
2	LHL	2	PreDox1	6.76177
2	LHL	2	PreDox1	10.19
2	LHL	2	PreDox1	8.4946
2	LHL	2	PreDox1	1.88982
2	LHL	2	PreDox1	8.04446
2	LHL	2	PreDox1	6.52814
2	LHL	2	PreDox1	9.2814
2	LHL	2	PreDox1	7.48834
2	LHL	2	PreDox1	8.52349
2	LHL	2	PreDox1	7.98661
2	LHL	2	PreDox1	6.94162
2	LHL	2	PreDox1	4.07008
2	LHL	2	PreDox1	2.54527
2	LHL	2	PreDox1	5.68919
2	LHL	2	PreDox1	7.13778
2	LHL	2	PreDox1	9.01317
2	LHL	2	PreDox1	6.76207
2	LHL	2	PreDox1	7.29904
2	LHL	2	PreDox1	9.87287
2	LHL	2	PreDox1	4.67858
2	LHL	2	PreDox1	2.78611
2	LHL	2	PreDox1	11.7909
2	LHL	2	PreDox1	6.83061
2	LHL	2	PreDox1	9.61639
2	LHL	2	PreDox1	8.98911
2	LHL	2	PreDox1	3.35652
2	LHL	2	PreDox1	6.08883
2	LHL	2	PreDox1	3.4762
2	LHL	2	PreDox1	2.68898
2	LHL	2	PreDox1	1.79482
2	LHL	2	PreDox1	3.435
2	LHL	2	PreDox1	0.944674
2	RHL	1	PreDox1	4.49908
2	RHL	1	PreDox1	0.533955
2	RHL	1	PreDox1	1.99494
2	RHL	1	PreDox1	4.09691
2	RHL	1	PreDox1	5.47508
2	RHL	1	PreDox1	7.37318
2	RHL	1	PreDox1	10.4113
2	RHL	1	PreDox1	4.93069
2	RHL	1	PreDox1	0.308224
2	RHL	1	PreDox1	3.25416
2	RHL	1	PreDox1	0.529898
2	RHL	1	PreDox1	1.20607
2	RHL	1	PreDox1	0.701028
2	RHL	1	PreDox1	0.23788
2	RHL	1	PreDox1	5.27582
2	RHL	1	PreDox1	3.95053
2	RHL	1	PreDox1	3.85173
2	RHL	1	PreDox1	3.75847
2	RHL	1	PreDox1	1.18439
2	RHL	1	PreDox1	6.71221
2	RHL	1	PreDox1	8.84836
2	RHL	1	PreDox1	2.69358
2	RHL	1	PreDox1	0.0881244
2	RHL	1	PreDox1	5.66754
2	RHL	1	PreDox1	0.764792
2	RHL	1	PreDox1	3.74119
2	RHL	1	PreDox1	0.167619
2	RHL	1	PreDox1	1.02241
2	RHL	1	PreDox1	7.60462
2	RHL	1	PreDox1	8.32796
2	RHL	1	PreDox1	9.9963
2	RHL	1	PreDox1	8.05663
2	RHL	1	PreDox1	1.9143
2	RHL	1	PreDox1	3.75518
2	RHL	1	PreDox1	7.88392
2	RHL	1	PreDox1	4.63699
2	RHL	1	PreDox1	1.81219
2	RHL	1	PreDox1	2.72113
2	RHL	1	PreDox1	0.948705
2	RHL	1	PreDox1	2.22882
2	RHL	1	PreDox1	1.73623
2	RHL	1	PreDox1	0.533955
2	RHL	1	PreDox1	1.93004
2	RHL	1	PreDox1	6.30591
2	RHL	1	PreDox1	7.20231
2	RHL	1	PreDox1	4.8408
2	RHL	1	PreDox1	4.28361
2	RHL	1	PreDox1	1.86284
2	RHL	1	PreDox1	3.40653
2	RHL	1	PreDox1	5.89427
2	RHL	1	PreDox1	5.5118
2	RHL	1	PreDox1	0.950383
2	RHL	1	PreDox1	1.79329
2	RHL	1	PreDox1	0.931048
2	RHL	1	PreDox1	3.81984
2	RHL	1	PreDox1	3.89439
2	RHL	1	PreDox1	4.35175
2	RHL	1	PreDox1	3.80549
2	RHL	1	PreDox1	8.40899
2	RHL	1	PreDox1	9.78065
2	RHL	1	PreDox1	7.7486
2	RHL	1	PreDox1	6.62333
2	RHL	1	PreDox1	5.11366
2	RHL	1	PreDox1	1.04177
2	RHL	1	PreDox1	2.43535
2	RHL	1	PreDox1	1.94886
2	RHL	1	PreDox1	4.32813
2	RHL	1	PreDox1	3.56079
2	RHL	1	PreDox1	3.37549
2	RHL	1	PreDox1	6.20282
2	RHL	1	PreDox1	4.18022
2	RHL	1	PreDox1	3.55644
2	RHL	1	PreDox1	3.43966
2	RHL	1	PreDox1	7.16927
2	RHL	1	PreDox1	11.7231
2	RHL	1	PreDox1	10.8429
2	RHL	1	PreDox1	7.93413
2	RHL	2	PreDox1	2.85784
2	RHL	2	PreDox1	8.32403
2	RHL	2	PreDox1	11.1961
2	RHL	2	PreDox1	2.64452
2	RHL	2	PreDox1	1.10748
2	RHL	2	PreDox1	3.67737
2	RHL	2	PreDox1	0.705596
2	RHL	2	PreDox1	1.36972
2	RHL	2	PreDox1	0.164213
2	RHL	2	PreDox1	2.19923
2	RHL	2	PreDox1	0.414957
2	RHL	2	PreDox1	5.56485
2	RHL	2	PreDox1	8.02538
2	RHL	2	PreDox1	9.11923
2	RHL	2	PreDox1	8.77468
2	RHL	2	PreDox1	6.54834
2	RHL	2	PreDox1	4.9387
2	RHL	2	PreDox1	2.36466
2	RHL	2	PreDox1	5.49178
2	RHL	2	PreDox1	0.863222
2	RHL	2	PreDox1	1.40677
2	RHL	2	PreDox1	1.80195
2	RHL	2	PreDox1	0.791157
2	RHL	2	PreDox1	0.96459
2	RHL	2	PreDox1	0.135463
2	RHL	2	PreDox1	5.39755
2	RHL	2	PreDox1	7.14284
2	RHL	2	PreDox1	2.32849
2	RHL	2	PreDox1	2.08211
2	RHL	2	PreDox1	5.50368
2	RHL	2	PreDox1	3.33836
2	RHL	2	PreDox1	3.29497
2	RHL	2	PreDox1	0.533955
2	RHL	2	PreDox1	2.5948
2	RHL	2	PreDox1	7.75561
2	RHL	2	PreDox1	7.12629
2	RHL	2	PreDox1	3.38118
2	RHL	2	PreDox1	2.73728
2	RHL	2	PreDox1	6.75307
2	RHL	2	PreDox1	0.636236
2	RHL	2	PreDox1	1.21061
2	RHL	2	PreDox1	0.575954
2	RHL	2	PreDox1	1.71376
2	RHL	2	PreDox1	2.35269
2	RHL	2	PreDox1	2.5422
2	RHL	2	PreDox1	7.40393
2	RHL	2	PreDox1	4.30788
2	RHL	2	PreDox1	5.39159
2	RHL	2	PreDox1	3.27603
2	RHL	2	PreDox1	2.29908
2	RHL	2	PreDox1	2.79389
2	RHL	2	PreDox1	5.10351
2	RHL	2	PreDox1	1.98756
2	RHL	2	PreDox1	0.997571
2	RHL	2	PreDox1	1.15506
2	RHL	2	PreDox1	3.13126
2	RHL	2	PreDox1	3.50628
2	RHL	2	PreDox1	3.28244
2	RHL	2	PreDox1	1.49324
2	RHL	2	PreDox1	1.97808
2	RHL	2	PreDox1	3.35337
2	RHL	2	PreDox1	6.88838
2	RHL	2	PreDox1	10.4271
2	RHL	2	PreDox1	8.28068
2	RHL	2	PreDox1	9.37863
2	RHL	2	PreDox1	6.61342
2	RHL	2	PreDox1	0.533955
2	RHL	2	PreDox1	4.16995
2	RHL	2	PreDox1	4.79005
2	RHL	2	PreDox1	1.68177
2	RHL	2	PreDox1	0.102439
2	RHL	2	PreDox1	0.343592
2	RHL	2	PreDox1	0.275003
2	RHL	2	PreDox1	0.621413
2	RHL	2	PreDox1	0.653218
2	RHL	2	PreDox1	1.53496
2	RHL	2	PreDox1	0.375372
2	RHL	2	PreDox1	1.40132
2	RHL	2	PreDox1	5.66421
2	RHL	2	PreDox1	8.40365
2	RHL	2	PreDox1	8.62055
2	RHL	2	PreDox1	8.58881
2	RHL	2	PreDox1	6.2678
2	RHL	2	PreDox1	3.46871
2	RHL	2	PreDox1	2.03536
2	RHL	2	PreDox1	2.21108
2	RHL	2	PreDox1	0.94642
2	RHL	2	PreDox1	1.95535
2	RHL	2	PreDox1	1.58757
2	RHL	2	PreDox1	2.11023
2	RHL	2	PreDox1	3.09798
2	RHL	2	PreDox1	1.40504
2	RHL	2	PreDox1	3.06015
2	RHL	2	PreDox1	2.62267
2	RHL	2	PreDox1	6.45103
2	RHL	2	PreDox1	6.13514
2	RHL	2	PreDox1	8.58303
2	RHL	2	PreDox1	11.8233
2	RHL	2	PreDox1	10.5565
2	RHL	2	PreDox1	10.8335
2	RHL	2	PreDox1	7.961
2	RHL	2	PreDox1	5.41573
2	RHL	2	PreDox1	2.12128
2	RHL	2	PreDox1	2.31998
2	RHL	3	PreDox1	0.533955
2	RHL	3	PreDox1	3.1425
2	RHL	3	PreDox1	2.78382
2	RHL	3	PreDox1	1.12632
2	RHL	3	PreDox1	0.533955
2	RHL	3	PreDox1	0.237719
2	RHL	3	PreDox1	4.83645
2	RHL	3	PreDox1	0.361472
2	RHL	3	PreDox1	2.13636
2	RHL	3	PreDox1	5.37698
2	RHL	3	PreDox1	7.53129
2	RHL	3	PreDox1	8.59456
2	RHL	3	PreDox1	0.42643
2	RHL	3	PreDox1	2.33801
2	RHL	3	PreDox1	5.60021
2	RHL	3	PreDox1	2.22766
2	RHL	3	PreDox1	2.32844
2	RHL	3	PreDox1	5.4456
2	RHL	3	PreDox1	4.91999
2	RHL	3	PreDox1	2.54521
2	RHL	3	PreDox1	2.12115
2	RHL	3	PreDox1	1.80967
2	RHL	3	PreDox1	0.533955
2	RHL	3	PreDox1	0.115338
2	RHL	3	PreDox1	0.590367
2	RHL	3	PreDox1	6.9731
2	RHL	3	PreDox1	6.26935
2	RHL	3	PreDox1	5.33154
2	RHL	3	PreDox1	0.367963
2	RHL	3	PreDox1	2.81439
2	RHL	3	PreDox1	3.08086
2	RHL	3	PreDox1	1.64827
2	RHL	3	PreDox1	0.898496
2	RHL	3	PreDox1	2.36167
2	RHL	3	PreDox1	2.19025
2	RHL	3	PreDox1	0.435312
2	RHL	3	PreDox1	2.42648
2	RHL	3	PreDox1	4.99626
2	RHL	3	PreDox1	7.57357
2	RHL	3	PreDox1	6.81103
7	LHL	1	PreDox1	18.8119
7	LHL	1	PreDox1	15.2264
7	LHL	1	PreDox1	19.192
7	LHL	1	PreDox1	22.5929
7	LHL	1	PreDox1	20.1399
7	LHL	1	PreDox1	19.3297
7	LHL	1	PreDox1	18.4374
7	LHL	1	PreDox1	17.7545
7	LHL	1	PreDox1	18.7619
7	LHL	1	PreDox1	18.3302
7	LHL	1	PreDox1	20.4318
7	LHL	1	PreDox1	22.1525
7	LHL	1	PreDox1	23.1446
7	LHL	1	PreDox1	22.3247
7	LHL	1	PreDox1	15.0452
7	LHL	1	PreDox1	17.6998
7	LHL	1	PreDox1	12.9149
7	LHL	1	PreDox1	14.0822
7	LHL	1	PreDox1	16.5976
7	LHL	1	PreDox1	21.2262
7	LHL	1	PreDox1	21.3283
7	LHL	1	PreDox1	21.6366
7	LHL	1	PreDox1	22.8906
7	LHL	1	PreDox1	26.2089
7	LHL	1	PreDox1	24.4599
7	LHL	1	PreDox1	23.0725
7	LHL	1	PreDox1	24.3624
7	LHL	1	PreDox1	27.3513
7	LHL	1	PreDox1	18.1184
7	LHL	1	PreDox1	25.7573
7	LHL	1	PreDox1	23.986
7	LHL	1	PreDox1	19.8083
7	LHL	1	PreDox1	12.6289
7	LHL	1	PreDox1	12.1481
7	LHL	1	PreDox1	18.0387
7	LHL	1	PreDox1	18.3302
7	LHL	1	PreDox1	19.6034
7	LHL	1	PreDox1	21.8206
7	LHL	1	PreDox1	20.7591
7	LHL	1	PreDox1	17.6172
7	LHL	1	PreDox1	16.0991
7	LHL	1	PreDox1	15.9117
7	LHL	1	PreDox1	15.3149
7	LHL	1	PreDox1	16.301
7	LHL	1	PreDox1	16.0728
7	LHL	1	PreDox1	15.0947
7	LHL	1	PreDox1	18.0138
7	LHL	1	PreDox1	14.8679
7	LHL	1	PreDox1	13.3969
7	LHL	1	PreDox1	11.4847
7	LHL	1	PreDox1	12.6289
7	LHL	1	PreDox1	13.6727
7	LHL	1	PreDox1	15.9297
7	LHL	1	PreDox1	20.0748
7	LHL	1	PreDox1	17.4328
7	LHL	1	PreDox1	21.0295
7	LHL	1	PreDox1	22.137
7	LHL	1	PreDox1	19.4523
7	LHL	1	PreDox1	20.529
7	LHL	1	PreDox1	22.7924
7	LHL	1	PreDox1	20.05
7	LHL	1	PreDox1	25.0097
7	LHL	1	PreDox1	21.0892
7	LHL	1	PreDox1	21.501
7	LHL	1	PreDox1	17.9504
7	LHL	1	PreDox1	15.7626
7	LHL	1	PreDox1	12.7901
7	LHL	1	PreDox1	11.4728
7	LHL	1	PreDox1	16.2902
7	LHL	1	PreDox1	16.3789
7	LHL	1	PreDox1	17.5218
7	LHL	1	PreDox1	17.3697
7	LHL	1	PreDox1	15.9439
7	LHL	1	PreDox1	16.8721
7	LHL	1	PreDox1	13.8549
7	LHL	1	PreDox1	12.4752
7	LHL	1	PreDox1	15.2713
7	LHL	1	PreDox1	14.9563
7	LHL	1	PreDox1	13.401
7	LHL	1	PreDox1	15.6919
7	LHL	1	PreDox1	13.063
7	LHL	1	PreDox1	11.2108
7	LHL	1	PreDox1	7.44142
7	LHL	1	PreDox1	7.46995
7	LHL	1	PreDox1	17.1549
7	LHL	1	PreDox1	16.9465
7	LHL	1	PreDox1	17.218
7	LHL	1	PreDox1	17.0714
7	LHL	1	PreDox1	19.0677
7	LHL	1	PreDox1	21.9403
7	LHL	1	PreDox1	23.2278
7	LHL	1	PreDox1	19.107
7	LHL	1	PreDox1	15.1061
7	LHL	1	PreDox1	20.7592
7	LHL	1	PreDox1	23.1545
7	LHL	1	PreDox1	22.7764
7	LHL	1	PreDox1	18.9008
7	LHL	1	PreDox1	12.4656
7	LHL	1	PreDox1	10.7097
7	LHL	1	PreDox1	8.12145
7	LHL	1	PreDox1	11.8549
7	LHL	1	PreDox1	14.9549
7	LHL	2	PreDox1	8.83718
7	LHL	2	PreDox1	9.34544
7	LHL	2	PreDox1	11.2738
7	LHL	2	PreDox1	13.6793
7	LHL	2	PreDox1	14.5299
7	LHL	2	PreDox1	15.2147
7	LHL	2	PreDox1	14.4753
7	LHL	2	PreDox1	12.0724
7	LHL	2	PreDox1	7.87152
7	LHL	2	PreDox1	8.6757
7	LHL	2	PreDox1	10.7959
7	LHL	2	PreDox1	10.0892
7	LHL	2	PreDox1	12.9706
7	LHL	2	PreDox1	14.4576
7	LHL	2	PreDox1	13.3147
7	LHL	2	PreDox1	10.8376
7	LHL	2	PreDox1	11.4775
7	LHL	2	PreDox1	12.5334
7	LHL	2	PreDox1	9.76126
7	LHL	2	PreDox1	14.3965
7	LHL	2	PreDox1	17.0689
7	LHL	2	PreDox1	15.4441
7	LHL	2	PreDox1	8.5378
7	LHL	2	PreDox1	10.4546
7	LHL	2	PreDox1	9.18041
7	LHL	2	PreDox1	7.4877
7	LHL	2	PreDox1	11.8477
7	LHL	2	PreDox1	14.8719
7	LHL	2	PreDox1	16.8224
7	LHL	2	PreDox1	12.6778
7	LHL	2	PreDox1	12.5968
7	LHL	2	PreDox1	13.6869
7	LHL	2	PreDox1	13.1102
7	LHL	2	PreDox1	10.9055
7	LHL	2	PreDox1	13.3113
7	LHL	2	PreDox1	19.0435
7	LHL	2	PreDox1	16.618
7	LHL	2	PreDox1	9.27611
7	LHL	2	PreDox1	9.06368
7	LHL	2	PreDox1	7.57757
7	LHL	2	PreDox1	10.3809
7	LHL	2	PreDox1	12.6528
7	LHL	2	PreDox1	17.07
7	LHL	2	PreDox1	18.6541
7	LHL	2	PreDox1	17.4868
7	LHL	2	PreDox1	15.2525
7	LHL	2	PreDox1	13.5521
7	LHL	2	PreDox1	9.83587
7	LHL	2	PreDox1	15.5097
7	LHL	2	PreDox1	16.8945
7	LHL	2	PreDox1	16.4514
7	LHL	2	PreDox1	12.9195
7	LHL	2	PreDox1	8.86592
7	LHL	2	PreDox1	10.11
7	LHL	2	PreDox1	11.0013
7	LHL	2	PreDox1	11.021
7	LHL	2	PreDox1	11.597
7	LHL	2	PreDox1	11.0283
7	LHL	2	PreDox1	8.1897
7	LHL	2	PreDox1	5.1353
7	LHL	2	PreDox1	6.34021
7	LHL	2	PreDox1	3.76465
7	LHL	2	PreDox1	5.9412
7	LHL	2	PreDox1	5.99593
7	LHL	2	PreDox1	6.24933
7	LHL	2	PreDox1	11.6862
7	LHL	2	PreDox1	6.31825
7	LHL	2	PreDox1	5.41466
7	LHL	2	PreDox1	3.9262
7	LHL	2	PreDox1	6.65585
7	LHL	2	PreDox1	10.7997
7	LHL	2	PreDox1	11.5919
7	LHL	2	PreDox1	17.3798
7	LHL	2	PreDox1	18.4179
7	LHL	2	PreDox1	21.5592
7	LHL	2	PreDox1	25.536
7	LHL	2	PreDox1	21.6145
7	LHL	2	PreDox1	19.0722
7	LHL	2	PreDox1	17.8336
7	LHL	2	PreDox1	19.455
7	LHL	2	PreDox1	18.4249
7	LHL	2	PreDox1	19.8038
7	LHL	2	PreDox1	12.9067
7	LHL	2	PreDox1	14.9697
7	LHL	2	PreDox1	9.82877
7	LHL	2	PreDox1	12.9596
7	LHL	2	PreDox1	14.2099
7	LHL	2	PreDox1	16.419
7	LHL	2	PreDox1	21.1251
7	LHL	3	PreDox1	11.2684
7	LHL	3	PreDox1	12.4174
7	LHL	3	PreDox1	9.38507
7	LHL	3	PreDox1	8.58373
7	LHL	3	PreDox1	6.09719
7	LHL	3	PreDox1	6.82435
7	LHL	3	PreDox1	10.839
7	LHL	3	PreDox1	13.0392
7	LHL	3	PreDox1	13.9011
7	LHL	3	PreDox1	13.1697
7	LHL	3	PreDox1	9.28829
7	LHL	3	PreDox1	10.9727
7	LHL	3	PreDox1	12.6433
7	LHL	3	PreDox1	11.9758
7	LHL	3	PreDox1	12.6285
7	LHL	3	PreDox1	15.2394
7	LHL	3	PreDox1	15.5388
7	LHL	3	PreDox1	13.3129
7	LHL	3	PreDox1	10.839
7	LHL	3	PreDox1	9.94971
7	LHL	3	PreDox1	8.88933
7	LHL	3	PreDox1	8.88926
7	LHL	3	PreDox1	11.0762
7	LHL	3	PreDox1	10.8547
7	LHL	3	PreDox1	10.6774
7	LHL	3	PreDox1	12.1614
7	LHL	3	PreDox1	14.6271
7	LHL	3	PreDox1	11.05
7	LHL	3	PreDox1	11.5561
7	LHL	3	PreDox1	15.5224
7	LHL	3	PreDox1	15.1408
7	LHL	3	PreDox1	12.8529
7	LHL	3	PreDox1	10.5301
7	LHL	3	PreDox1	11.263
7	LHL	3	PreDox1	11.5295
7	LHL	3	PreDox1	10.5124
7	LHL	3	PreDox1	10.7088
7	LHL	3	PreDox1	14.1684
7	LHL	3	PreDox1	13.7031
7	LHL	3	PreDox1	9.30762
7	LHL	3	PreDox1	12.3478
7	LHL	3	PreDox1	16.8527
7	LHL	3	PreDox1	17.1161
7	LHL	3	PreDox1	16.5096
7	LHL	3	PreDox1	10.8057
7	LHL	3	PreDox1	15.2214
7	LHL	3	PreDox1	14.8034
7	LHL	3	PreDox1	10.2109
7	LHL	3	PreDox1	10.9436
7	LHL	3	PreDox1	8.59434
7	LHL	3	PreDox1	4.42464
7	LHL	3	PreDox1	7.81241
7	LHL	3	PreDox1	8.74261
7	LHL	3	PreDox1	9.5174
7	LHL	3	PreDox1	4.85699
7	LHL	3	PreDox1	4.31808
7	LHL	3	PreDox1	7.79461
7	LHL	3	PreDox1	4.16852
7	LHL	3	PreDox1	3.576
7	LHL	3	PreDox1	3.82757
7	LHL	3	PreDox1	6.2506
7	LHL	3	PreDox1	5.88169
7	LHL	3	PreDox1	3.9674
7	LHL	3	PreDox1	2.74201
7	LHL	3	PreDox1	1.55375
7	LHL	3	PreDox1	0.190643
7	LHL	3	PreDox1	4.31559
7	LHL	3	PreDox1	4.67767
7	LHL	3	PreDox1	7.9557
7	LHL	3	PreDox1	8.20491
7	LHL	3	PreDox1	8.01127
7	LHL	3	PreDox1	7.25096
7	LHL	3	PreDox1	3.48466
7	LHL	3	PreDox1	6.22514
7	LHL	3	PreDox1	4.16752
7	LHL	3	PreDox1	4.16482
7	LHL	3	PreDox1	10.6415
7	LHL	3	PreDox1	4.64349
7	LHL	3	PreDox1	5.52532
7	LHL	3	PreDox1	4.82138
7	LHL	3	PreDox1	4.32857
7	LHL	3	PreDox1	1.56843
7	LHL	3	PreDox1	3.34744
7	LHL	3	PreDox1	5.11845
7	LHL	3	PreDox1	13.2035
7	LHL	3	PreDox1	14.0586
7	LHL	3	PreDox1	13.6456
7	LHL	3	PreDox1	11.5823
7	LHL	3	PreDox1	14.7113
7	LHL	3	PreDox1	12.2657
7	LHL	3	PreDox1	17.0026
7	LHL	3	PreDox1	11.7143
7	LHL	3	PreDox1	12.7832
7	LHL	3	PreDox1	9.83542
7	RHL	1	PreDox1	4.82143
7	RHL	1	PreDox1	10.1351
7	RHL	1	PreDox1	14.7727
7	RHL	1	PreDox1	13.2954
7	RHL	1	PreDox1	18.0967
7	RHL	1	PreDox1	17.7415
7	RHL	1	PreDox1	17.981
7	RHL	1	PreDox1	17.6379
7	RHL	1	PreDox1	16.6016
7	RHL	1	PreDox1	15.598
7	RHL	1	PreDox1	13.56
7	RHL	1	PreDox1	8.77224
7	RHL	1	PreDox1	4.97956
7	RHL	1	PreDox1	0.877404
7	RHL	1	PreDox1	0.709735
7	RHL	1	PreDox1	0.136579
7	RHL	1	PreDox1	3.2615
7	RHL	1	PreDox1	6.19658
7	RHL	1	PreDox1	8.68306
7	RHL	1	PreDox1	10.7172
7	RHL	1	PreDox1	8.61454
7	RHL	1	PreDox1	14.3642
7	RHL	1	PreDox1	16.5344
7	RHL	1	PreDox1	10.0469
7	RHL	1	PreDox1	13.2221
7	RHL	1	PreDox1	14.4876
7	RHL	1	PreDox1	13.8831
7	RHL	1	PreDox1	9.39758
7	RHL	1	PreDox1	5.61083
7	RHL	1	PreDox1	1.40244
7	RHL	1	PreDox1	1.55492
7	RHL	1	PreDox1	4.08696
7	RHL	1	PreDox1	7.72873
7	RHL	1	PreDox1	10.3071
7	RHL	1	PreDox1	11.713
7	RHL	1	PreDox1	11.1191
7	RHL	1	PreDox1	10.8806
7	RHL	1	PreDox1	13.7087
7	RHL	1	PreDox1	11.2195
7	RHL	1	PreDox1	10.7581
7	RHL	1	PreDox1	11.6887
7	RHL	1	PreDox1	10.2548
7	RHL	1	PreDox1	10.6337
7	RHL	1	PreDox1	6.99416
7	RHL	1	PreDox1	4.65984
7	RHL	1	PreDox1	1.27528
7	RHL	1	PreDox1	3.77344
7	RHL	1	PreDox1	3.06773
7	RHL	1	PreDox1	1.94456
7	RHL	1	PreDox1	6.87417
7	RHL	1	PreDox1	9.27688
7	RHL	1	PreDox1	10.5778
7	RHL	1	PreDox1	14.3421
7	RHL	1	PreDox1	16.5215
7	RHL	1	PreDox1	13.3293
7	RHL	1	PreDox1	12.3559
7	RHL	1	PreDox1	12.563
7	RHL	1	PreDox1	12.5477
7	RHL	1	PreDox1	13.6047
7	RHL	1	PreDox1	8.86745
7	RHL	1	PreDox1	7.23056
7	RHL	1	PreDox1	2.09783
7	RHL	1	PreDox1	2.56456
7	RHL	1	PreDox1	1.99931
7	RHL	1	PreDox1	0.90946
7	RHL	1	PreDox1	2.68403
7	RHL	1	PreDox1	6.69605
7	RHL	1	PreDox1	8.55764
7	RHL	1	PreDox1	8.67048
7	RHL	1	PreDox1	11.5208
7	RHL	1	PreDox1	11.7974
7	RHL	1	PreDox1	11.0962
7	RHL	1	PreDox1	14.5235
7	RHL	1	PreDox1	9.2736
7	RHL	1	PreDox1	10.2849
7	RHL	1	PreDox1	9.25824
7	RHL	1	PreDox1	7.66377
7	RHL	1	PreDox1	3.02766
7	RHL	2	PreDox1	11.4305
7	RHL	2	PreDox1	9.96511
7	RHL	2	PreDox1	7.97506
7	RHL	2	PreDox1	1.7132
7	RHL	2	PreDox1	2.57169
7	RHL	2	PreDox1	5.03085
7	RHL	2	PreDox1	5.29568
7	RHL	2	PreDox1	7.40375
7	RHL	2	PreDox1	8.42701
7	RHL	2	PreDox1	10.2555
7	RHL	2	PreDox1	12.5402
7	RHL	2	PreDox1	14.7206
7	RHL	2	PreDox1	13.2122
7	RHL	2	PreDox1	12.2697
7	RHL	2	PreDox1	14.6543
7	RHL	2	PreDox1	10.3308
7	RHL	2	PreDox1	12.3242
7	RHL	2	PreDox1	9.80577
7	RHL	2	PreDox1	6.87177
7	RHL	2	PreDox1	3.96503
7	RHL	2	PreDox1	4.93111
7	RHL	2	PreDox1	2.33496
7	RHL	2	PreDox1	3.11764
7	RHL	2	PreDox1	7.00702
7	RHL	2	PreDox1	7.62278
7	RHL	2	PreDox1	9.37833
7	RHL	2	PreDox1	16.1029
7	RHL	2	PreDox1	15.8745
7	RHL	2	PreDox1	14.6306
7	RHL	2	PreDox1	13.7156
7	RHL	2	PreDox1	14.5311
7	RHL	2	PreDox1	14.3671
7	RHL	2	PreDox1	12.8494
7	RHL	2	PreDox1	6.1426
7	RHL	2	PreDox1	1.45075
7	RHL	2	PreDox1	0.104126
7	RHL	2	PreDox1	1.5514
7	RHL	2	PreDox1	3.30915
7	RHL	2	PreDox1	4.57741
7	RHL	2	PreDox1	5.47408
7	RHL	2	PreDox1	5.88109
7	RHL	2	PreDox1	5.94053
7	RHL	2	PreDox1	11.4558
7	RHL	2	PreDox1	12.9539
7	RHL	2	PreDox1	12.0271
7	RHL	2	PreDox1	11.6301
7	RHL	2	PreDox1	13.2565
7	RHL	2	PreDox1	12.2231
7	RHL	2	PreDox1	10.1307
7	RHL	2	PreDox1	5.77739
7	RHL	2	PreDox1	1.73609
7	RHL	2	PreDox1	0.840179
7	RHL	2	PreDox1	1.37857
7	RHL	2	PreDox1	0.645106
7	RHL	2	PreDox1	1.13774
7	RHL	2	PreDox1	7.99302
7	RHL	2	PreDox1	9.01516
7	RHL	2	PreDox1	9.00293
7	RHL	2	PreDox1	13.2307
7	RHL	2	PreDox1	14.4788
7	RHL	2	PreDox1	15.129
7	RHL	2	PreDox1	13.3601
7	RHL	2	PreDox1	15.1363
7	RHL	2	PreDox1	16.9323
7	RHL	2	PreDox1	13.7853
7	RHL	2	PreDox1	9.58096
7	RHL	2	PreDox1	4.65531
7	RHL	2	PreDox1	5.54524
7	RHL	2	PreDox1	4.33743
7	RHL	2	PreDox1	2.48973
7	RHL	2	PreDox1	3.25818
7	RHL	2	PreDox1	5.57684
7	RHL	2	PreDox1	7.57664
7	RHL	2	PreDox1	7.04841
7	RHL	2	PreDox1	8.97494
7	RHL	2	PreDox1	13.4774
7	RHL	2	PreDox1	11.6063
7	RHL	2	PreDox1	9.61237
7	RHL	2	PreDox1	10.4259
7	RHL	2	PreDox1	11.2735
7	RHL	2	PreDox1	8.90447
7	RHL	2	PreDox1	8.08131
7	RHL	2	PreDox1	4.48225
7	RHL	2	PreDox1	2.95861
7	RHL	2	PreDox1	5.00751
7	RHL	2	PreDox1	4.45336
7	RHL	2	PreDox1	4.51276
7	RHL	2	PreDox1	2.22363
7	RHL	2	PreDox1	1.02488
7	RHL	2	PreDox1	5.61462
7	RHL	2	PreDox1	1.74569
7	RHL	2	PreDox1	1.61398
7	RHL	2	PreDox1	5.05056
7	RHL	3	PreDox1	7.40043
7	RHL	3	PreDox1	8.38658
7	RHL	3	PreDox1	6.74692
7	RHL	3	PreDox1	4.71597
7	RHL	3	PreDox1	1.69295
7	RHL	3	PreDox1	3.53058
7	RHL	3	PreDox1	1.89252
7	RHL	3	PreDox1	0.366662
7	RHL	3	PreDox1	0.723192
7	RHL	3	PreDox1	4.41798
7	RHL	3	PreDox1	5.89814
7	RHL	3	PreDox1	6.89472
7	RHL	3	PreDox1	8.2938
7	RHL	3	PreDox1	13.7234
7	RHL	3	PreDox1	11.185
7	RHL	3	PreDox1	11.0308
7	RHL	3	PreDox1	10.7876
7	RHL	3	PreDox1	10.1036
7	RHL	3	PreDox1	11.0927
7	RHL	3	PreDox1	10.7768
7	RHL	3	PreDox1	12.3619
7	RHL	3	PreDox1	11.0518
7	RHL	3	PreDox1	5.03144
7	RHL	3	PreDox1	5.41883
7	RHL	3	PreDox1	6.21174
7	RHL	3	PreDox1	8.57175
7	RHL	3	PreDox1	11.7341
7	RHL	3	PreDox1	13.3984
7	RHL	3	PreDox1	14.3323
7	RHL	3	PreDox1	11.5426
7	RHL	3	PreDox1	13.9708
7	RHL	3	PreDox1	13.3063
7	RHL	3	PreDox1	11.257
7	RHL	3	PreDox1	12.5773
7	RHL	3	PreDox1	9.74988
7	RHL	3	PreDox1	10.0684
7	RHL	3	PreDox1	9.41067
7	RHL	3	PreDox1	5.40375
7	RHL	3	PreDox1	1.20618
7	RHL	3	PreDox1	2.38829
7	RHL	3	PreDox1	5.43036
7	RHL	3	PreDox1	4.20729
7	RHL	3	PreDox1	3.25477
7	RHL	3	PreDox1	1.75923
7	RHL	3	PreDox1	5.27109
7	RHL	3	PreDox1	4.97534
7	RHL	3	PreDox1	8.01039
7	RHL	3	PreDox1	9.94612
7	RHL	3	PreDox1	9.02321
7	RHL	3	PreDox1	5.0508
7	RHL	3	PreDox1	5.44507
7	RHL	3	PreDox1	7.6771
7	RHL	3	PreDox1	7.41419
7	RHL	3	PreDox1	5.33134
7	RHL	3	PreDox1	3.65809
7	RHL	3	PreDox1	0.197392
7	RHL	3	PreDox1	0.822624
7	RHL	3	PreDox1	2.94403
7	RHL	3	PreDox1	2.46643
7	RHL	3	PreDox1	0.175198
7	RHL	3	PreDox1	2.72101
7	RHL	3	PreDox1	4.22888
7	RHL	3	PreDox1	3.08379
7	RHL	3	PreDox1	3.31958
7	RHL	3	PreDox1	3.7715
7	RHL	3	PreDox1	5.97111
7	RHL	3	PreDox1	6.59338
7	RHL	3	PreDox1	6.40261
7	RHL	3	PreDox1	6.35116
7	RHL	3	PreDox1	8.17522
7	RHL	3	PreDox1	5.54587
7	RHL	3	PreDox1	9.23621
7	RHL	3	PreDox1	6.17523
7	RHL	3	PreDox1	4.99956
7	RHL	3	PreDox1	0.334145
7	RHL	3	PreDox1	0.534578
7	RHL	3	PreDox1	2.78929
7	RHL	3	PreDox1	0.00705408
7	RHL	3	PreDox1	0.162454
7	RHL	3	PreDox1	2.06703
7	RHL	3	PreDox1	2.18015
7	RHL	3	PreDox1	1.83636
7	RHL	3	PreDox1	5.61149
7	RHL	3	PreDox1	5.05041
7	RHL	3	PreDox1	8.92771
7	RHL	3	PreDox1	4.06291
7	RHL	3	PreDox1	4.38551
7	RHL	3	PreDox1	5.45588
7	RHL	3	PreDox1	6.08514
7	RHL	3	PreDox1	5.89045
7	RHL	3	PreDox1	2.68022
7	RHL	3	PreDox1	2.85809
7	RHL	3	PreDox1	5.74268
8	LHL	1	PreDox1	15.0938
8	LHL	1	PreDox1	14.4569
8	LHL	1	PreDox1	14.6357
8	LHL	1	PreDox1	17.3563
8	LHL	1	PreDox1	12.9307
8	LHL	1	PreDox1	13.5765
8	LHL	1	PreDox1	19.0855
8	LHL	1	PreDox1	20.2294
8	LHL	1	PreDox1	17.6423
8	LHL	1	PreDox1	17.9646
8	LHL	1	PreDox1	17.4458
8	LHL	1	PreDox1	15.5892
8	LHL	1	PreDox1	17.1466
8	LHL	1	PreDox1	16.2514
8	LHL	1	PreDox1	15.0735
8	LHL	1	PreDox1	13.7727
8	LHL	1	PreDox1	11.7989
8	LHL	1	PreDox1	12.6729
8	LHL	1	PreDox1	9.04592
8	LHL	1	PreDox1	7.85378
8	LHL	1	PreDox1	13.2165
8	LHL	1	PreDox1	12.403
8	LHL	1	PreDox1	12.2708
8	LHL	1	PreDox1	14.6441
8	LHL	1	PreDox1	12.2984
8	LHL	1	PreDox1	16.5349
8	LHL	1	PreDox1	15.5999
8	LHL	1	PreDox1	16.2838
8	LHL	1	PreDox1	16.338
8	LHL	1	PreDox1	15.0381
8	LHL	1	PreDox1	15.4178
8	LHL	1	PreDox1	17.9104
8	LHL	1	PreDox1	15.1524
8	LHL	1	PreDox1	13.6488
8	LHL	1	PreDox1	11.08
8	LHL	1	PreDox1	13.603
8	LHL	1	PreDox1	13.5432
8	LHL	1	PreDox1	13.3242
8	LHL	1	PreDox1	13.3242
8	LHL	1	PreDox1	16.4781
8	LHL	1	PreDox1	16.9674
8	LHL	1	PreDox1	16.5535
8	LHL	1	PreDox1	11.8335
8	LHL	1	PreDox1	9.93955
8	LHL	1	PreDox1	16.4591
8	LHL	1	PreDox1	13.7607
8	LHL	1	PreDox1	13.7601
8	LHL	1	PreDox1	13.498
8	LHL	1	PreDox1	12.6895
8	LHL	1	PreDox1	11.0214
8	LHL	1	PreDox1	8.37295
8	LHL	1	PreDox1	10.6623
8	LHL	1	PreDox1	11.1128
8	LHL	1	PreDox1	6.26478
8	LHL	2	PreDox1	19.434
8	LHL	2	PreDox1	17.8251
8	LHL	2	PreDox1	20.2727
8	LHL	2	PreDox1	19.0714
8	LHL	2	PreDox1	18.0039
8	LHL	2	PreDox1	19.5541
8	LHL	2	PreDox1	19.39
8	LHL	2	PreDox1	17.7676
8	LHL	2	PreDox1	19.1116
8	LHL	2	PreDox1	18.5214
8	LHL	2	PreDox1	20.9686
8	LHL	2	PreDox1	20.8621
8	LHL	2	PreDox1	21.2462
8	LHL	2	PreDox1	16.7661
8	LHL	2	PreDox1	16.5386
8	LHL	2	PreDox1	19.2897
8	LHL	2	PreDox1	15.2177
8	LHL	2	PreDox1	13.3761
8	LHL	2	PreDox1	18.4893
8	LHL	2	PreDox1	20.8993
8	LHL	2	PreDox1	20.6308
8	LHL	2	PreDox1	14.6886
8	LHL	2	PreDox1	14.1389
8	LHL	2	PreDox1	18.2968
8	LHL	2	PreDox1	17.7971
8	LHL	2	PreDox1	18.4091
8	LHL	2	PreDox1	19.928
8	LHL	2	PreDox1	22.0756
8	LHL	2	PreDox1	23.3202
8	LHL	2	PreDox1	24.2797
8	LHL	2	PreDox1	19.5854
8	LHL	2	PreDox1	16.0671
8	LHL	2	PreDox1	12.4667
8	LHL	2	PreDox1	15.7111
8	LHL	2	PreDox1	14.6896
8	LHL	2	PreDox1	17.3763
8	LHL	2	PreDox1	20.0428
8	LHL	2	PreDox1	19.1243
8	LHL	2	PreDox1	19.1223
8	LHL	2	PreDox1	21.3238
8	LHL	2	PreDox1	20.5333
8	LHL	2	PreDox1	19.2148
8	LHL	2	PreDox1	18.8882
8	LHL	2	PreDox1	17.1226
8	LHL	2	PreDox1	16.6495
8	LHL	2	PreDox1	15.6091
8	LHL	2	PreDox1	17.1467
8	LHL	2	PreDox1	15.8754
8	LHL	2	PreDox1	16.1125
8	LHL	2	PreDox1	15.9631
8	LHL	2	PreDox1	13.6688
8	LHL	2	PreDox1	11.8513
8	LHL	2	PreDox1	14.2677
8	LHL	2	PreDox1	17.8348
8	LHL	2	PreDox1	16.186
8	LHL	2	PreDox1	16.8641
8	LHL	2	PreDox1	18.071
8	LHL	2	PreDox1	19.0877
8	LHL	2	PreDox1	16.9898
8	LHL	2	PreDox1	16.9014
8	LHL	2	PreDox1	17.2929
8	LHL	2	PreDox1	17.6445
8	LHL	2	PreDox1	18.0086
8	LHL	2	PreDox1	21.4888
8	LHL	2	PreDox1	19.7731
8	LHL	2	PreDox1	17.3299
8	LHL	2	PreDox1	17.0785
8	LHL	2	PreDox1	16.243
8	LHL	2	PreDox1	14.2992
8	LHL	2	PreDox1	13.558
8	LHL	2	PreDox1	16.6972
8	LHL	2	PreDox1	19.6994
8	LHL	2	PreDox1	15.177
8	LHL	2	PreDox1	18.1338
8	LHL	2	PreDox1	20.9926
8	LHL	2	PreDox1	19.8822
8	LHL	2	PreDox1	17.3409
8	LHL	2	PreDox1	17.5891
8	LHL	2	PreDox1	15.9593
8	LHL	2	PreDox1	17.957
8	LHL	2	PreDox1	19.9724
8	LHL	2	PreDox1	16.8219
8	LHL	2	PreDox1	13.4505
8	LHL	2	PreDox1	12.4613
8	LHL	2	PreDox1	13.0069
8	LHL	2	PreDox1	13.8542
8	LHL	2	PreDox1	13.2759
8	LHL	2	PreDox1	19.0081
8	LHL	2	PreDox1	19.1206
8	LHL	2	PreDox1	16.1532
8	LHL	2	PreDox1	16.4392
8	LHL	2	PreDox1	18.7428
8	LHL	2	PreDox1	19.3477
8	LHL	2	PreDox1	16.8098
8	LHL	2	PreDox1	12.9071
8	LHL	2	PreDox1	17.9136
8	LHL	2	PreDox1	16.6253
8	LHL	2	PreDox1	16.543
8	LHL	2	PreDox1	15.4581
8	LHL	2	PreDox1	15.8324
8	LHL	2	PreDox1	16.625
8	LHL	2	PreDox1	13.5907
8	LHL	2	PreDox1	8.91968
8	LHL	2	PreDox1	10.3806
8	LHL	2	PreDox1	9.42559
8	LHL	2	PreDox1	12.762
8	LHL	2	PreDox1	16.7032
8	LHL	2	PreDox1	18.5641
8	LHL	2	PreDox1	16.2494
8	LHL	2	PreDox1	16.8317
8	LHL	2	PreDox1	16.6867
8	LHL	3	PreDox1	21.4131
8	LHL	3	PreDox1	20.1172
8	LHL	3	PreDox1	19.2598
8	LHL	3	PreDox1	18.4438
8	LHL	3	PreDox1	18.5107
8	LHL	3	PreDox1	22.2017
8	LHL	3	PreDox1	20.5435
8	LHL	3	PreDox1	16.9946
8	LHL	3	PreDox1	17.2835
8	LHL	3	PreDox1	16.6744
8	LHL	3	PreDox1	17.0132
8	LHL	3	PreDox1	19.1354
8	LHL	3	PreDox1	21.7432
8	LHL	3	PreDox1	20.9173
8	LHL	3	PreDox1	19.2905
8	LHL	3	PreDox1	17.9521
8	LHL	3	PreDox1	20.0831
8	LHL	3	PreDox1	20.6664
8	LHL	3	PreDox1	17.9574
8	LHL	3	PreDox1	18.1721
8	LHL	3	PreDox1	15.8246
8	LHL	3	PreDox1	17.6911
8	LHL	3	PreDox1	17.9039
8	LHL	3	PreDox1	19.1507
8	LHL	3	PreDox1	19.1566
8	LHL	3	PreDox1	15.6632
8	LHL	3	PreDox1	17.778
8	LHL	3	PreDox1	17.3551
8	LHL	3	PreDox1	16.6381
8	LHL	3	PreDox1	20.5377
8	LHL	3	PreDox1	19.3755
8	LHL	3	PreDox1	18.3968
8	LHL	3	PreDox1	16.4052
8	LHL	3	PreDox1	13.6743
8	LHL	3	PreDox1	20.1063
8	LHL	3	PreDox1	18.8944
8	LHL	3	PreDox1	19.1297
8	LHL	3	PreDox1	14.5853
8	LHL	3	PreDox1	17.0743
8	LHL	3	PreDox1	18.8436
8	LHL	3	PreDox1	18.3653
8	LHL	3	PreDox1	19.0827
8	LHL	3	PreDox1	17.8263
8	LHL	3	PreDox1	18.5988
8	LHL	3	PreDox1	17.9813
8	LHL	3	PreDox1	14.4228
8	LHL	3	PreDox1	17.7234
8	LHL	3	PreDox1	20.101
8	LHL	3	PreDox1	21.6668
8	LHL	3	PreDox1	18.0726
8	LHL	3	PreDox1	19.1694
8	LHL	3	PreDox1	20.0009
8	LHL	3	PreDox1	23.3819
8	LHL	3	PreDox1	21.5908
8	LHL	3	PreDox1	19.918
8	LHL	3	PreDox1	20.6662
8	LHL	3	PreDox1	21.1933
8	LHL	3	PreDox1	19.9262
8	LHL	3	PreDox1	21.4531
8	LHL	3	PreDox1	20.604
8	LHL	3	PreDox1	17.6846
8	LHL	3	PreDox1	16.5648
8	LHL	3	PreDox1	14.486
8	LHL	3	PreDox1	13.5861
8	LHL	3	PreDox1	11.822
8	LHL	3	PreDox1	10.0541
8	LHL	3	PreDox1	14.3658
8	LHL	3	PreDox1	16.8922
8	LHL	3	PreDox1	14.5943
8	LHL	3	PreDox1	16.2817
8	LHL	3	PreDox1	20.313
8	LHL	3	PreDox1	19.4564
8	LHL	3	PreDox1	16.0162
8	LHL	3	PreDox1	16.0111
8	LHL	3	PreDox1	17.2787
8	LHL	3	PreDox1	18.7164
8	LHL	3	PreDox1	19.7298
8	LHL	3	PreDox1	18.1623
8	LHL	3	PreDox1	17.0651
8	LHL	3	PreDox1	15.174
8	LHL	3	PreDox1	15.3859
8	LHL	3	PreDox1	14.3043
8	LHL	3	PreDox1	14.6246
8	LHL	3	PreDox1	14.3156
8	LHL	3	PreDox1	14.3637
8	LHL	3	PreDox1	15.512
8	LHL	3	PreDox1	13.5426
8	LHL	3	PreDox1	14.1837
8	LHL	3	PreDox1	19.1335
8	LHL	3	PreDox1	12.2095
8	LHL	3	PreDox1	12.8008
8	LHL	3	PreDox1	13.4999
8	LHL	3	PreDox1	15.8353
8	RHL	1	PreDox1	14.386
8	RHL	1	PreDox1	12.4657
8	RHL	1	PreDox1	15.1476
8	RHL	1	PreDox1	17.2912
8	RHL	1	PreDox1	20.0575
8	RHL	1	PreDox1	18.1057
8	RHL	1	PreDox1	17.9858
8	RHL	1	PreDox1	24.0802
8	RHL	1	PreDox1	20.8931
8	RHL	1	PreDox1	20.3662
8	RHL	1	PreDox1	18.3233
8	RHL	1	PreDox1	17.3378
8	RHL	1	PreDox1	20.8001
8	RHL	1	PreDox1	22.1573
8	RHL	1	PreDox1	19.0915
8	RHL	1	PreDox1	14.1196
8	RHL	1	PreDox1	14.806
8	RHL	1	PreDox1	14.2308
8	RHL	1	PreDox1	15.3136
8	RHL	1	PreDox1	16.2886
8	RHL	1	PreDox1	16.9968
8	RHL	1	PreDox1	16.8144
8	RHL	1	PreDox1	19.2248
8	RHL	1	PreDox1	20.8531
8	RHL	1	PreDox1	21.8969
8	RHL	1	PreDox1	22.9517
8	RHL	1	PreDox1	25.9128
8	RHL	1	PreDox1	24.2158
8	RHL	1	PreDox1	22.5362
8	RHL	1	PreDox1	22.1305
8	RHL	1	PreDox1	23.5022
8	RHL	1	PreDox1	24.8478
8	RHL	1	PreDox1	23.1009
8	RHL	1	PreDox1	22.4536
8	RHL	1	PreDox1	18.9473
8	RHL	1	PreDox1	16.3706
8	RHL	1	PreDox1	14.4146
8	RHL	1	PreDox1	13.3919
8	RHL	1	PreDox1	13.9991
8	RHL	1	PreDox1	14.839
8	RHL	1	PreDox1	14.9941
8	RHL	1	PreDox1	14.7732
8	RHL	1	PreDox1	13.2122
8	RHL	1	PreDox1	16.0422
8	RHL	1	PreDox1	14.4362
8	RHL	1	PreDox1	15.3252
8	RHL	1	PreDox1	17.9375
8	RHL	1	PreDox1	19.7798
8	RHL	1	PreDox1	17.6775
8	RHL	1	PreDox1	17.5227
8	RHL	1	PreDox1	17.0196
8	RHL	1	PreDox1	17.7729
8	RHL	1	PreDox1	18.9814
8	RHL	1	PreDox1	18.6637
8	RHL	1	PreDox1	16.4353
8	RHL	1	PreDox1	15.0958
8	RHL	1	PreDox1	11.3506
8	RHL	1	PreDox1	10.7912
8	RHL	1	PreDox1	11.9181
8	RHL	1	PreDox1	11.0064
8	RHL	1	PreDox1	12.4478
8	RHL	1	PreDox1	12.949
8	RHL	1	PreDox1	15.0277
8	RHL	1	PreDox1	15.7717
8	RHL	1	PreDox1	16.658
8	RHL	1	PreDox1	14.1994
8	RHL	1	PreDox1	12.885
8	RHL	1	PreDox1	14.7204
8	RHL	1	PreDox1	16.5394
8	RHL	1	PreDox1	15.9985
8	RHL	1	PreDox1	14.717
8	RHL	1	PreDox1	13.5298
8	RHL	1	PreDox1	15.2151
8	RHL	1	PreDox1	16.2294
8	RHL	1	PreDox1	16.0583
8	RHL	1	PreDox1	15.3484
8	RHL	1	PreDox1	12.8703
8	RHL	1	PreDox1	11.6915
8	RHL	1	PreDox1	10.064
8	RHL	1	PreDox1	9.42912
8	RHL	1	PreDox1	10.6912
8	RHL	1	PreDox1	12.2252
8	RHL	1	PreDox1	13.1855
8	RHL	1	PreDox1	14.7535
8	RHL	1	PreDox1	15.9224
8	RHL	1	PreDox1	16.2321
8	RHL	1	PreDox1	16.2435
8	RHL	1	PreDox1	14.5474
8	RHL	1	PreDox1	14.648
8	RHL	1	PreDox1	18.1272
8	RHL	1	PreDox1	19.2016
8	RHL	1	PreDox1	17.4529
8	RHL	1	PreDox1	16.1616
8	RHL	1	PreDox1	17.7311
8	RHL	1	PreDox1	18.5984
8	RHL	1	PreDox1	18.7337
8	RHL	1	PreDox1	18.1027
8	RHL	1	PreDox1	14.3869
8	RHL	1	PreDox1	13.8864
8	RHL	1	PreDox1	11.3761
8	RHL	1	PreDox1	8.35395
8	RHL	1	PreDox1	8.13497
8	RHL	1	PreDox1	8.47835
8	RHL	1	PreDox1	9.28137
8	RHL	1	PreDox1	11.3648
8	RHL	1	PreDox1	13.4162
8	RHL	1	PreDox1	16.5273
8	RHL	1	PreDox1	17.4552
8	RHL	1	PreDox1	15.8842
8	RHL	1	PreDox1	19.774
8	RHL	1	PreDox1	22.5156
8	RHL	1	PreDox1	21.1092
8	RHL	1	PreDox1	19.5839
8	RHL	1	PreDox1	17.8824
8	RHL	1	PreDox1	17.102
8	RHL	1	PreDox1	17.9896
8	RHL	1	PreDox1	17.9221
8	RHL	1	PreDox1	16.3721
8	RHL	1	PreDox1	13.264
8	RHL	1	PreDox1	10.6054
8	RHL	1	PreDox1	8.5256
8	RHL	1	PreDox1	8.46089
8	RHL	2	PreDox1	19.559
8	RHL	2	PreDox1	19.9071
8	RHL	2	PreDox1	18.7405
8	RHL	2	PreDox1	13.7239
8	RHL	2	PreDox1	11.3504
8	RHL	2	PreDox1	12.2316
8	RHL	2	PreDox1	13.128
8	RHL	2	PreDox1	9.27288
8	RHL	2	PreDox1	12.298
8	RHL	2	PreDox1	12.8202
8	RHL	2	PreDox1	12.9554
8	RHL	2	PreDox1	14.7673
8	RHL	2	PreDox1	16.1511
8	RHL	2	PreDox1	12.6616
8	RHL	2	PreDox1	14.1978
8	RHL	2	PreDox1	15.8007
8	RHL	2	PreDox1	18.3963
8	RHL	2	PreDox1	16.8985
8	RHL	2	PreDox1	13.7302
8	RHL	2	PreDox1	15.6256
8	RHL	2	PreDox1	16.6692
8	RHL	2	PreDox1	17.6105
8	RHL	2	PreDox1	16.2886
8	RHL	2	PreDox1	13.5083
8	RHL	2	PreDox1	12.616
8	RHL	2	PreDox1	13.9443
8	RHL	2	PreDox1	12.7229
8	RHL	2	PreDox1	14.2914
8	RHL	2	PreDox1	14.882
8	RHL	2	PreDox1	11.9335
8	RHL	2	PreDox1	14.651
8	RHL	2	PreDox1	15.3619
8	RHL	2	PreDox1	12.7668
8	RHL	2	PreDox1	12.5274
8	RHL	2	PreDox1	12.1948
8	RHL	2	PreDox1	13.6975
8	RHL	2	PreDox1	15.4563
8	RHL	2	PreDox1	14.579
8	RHL	2	PreDox1	14.1879
8	RHL	2	PreDox1	15.1024
8	RHL	2	PreDox1	16.6698
8	RHL	2	PreDox1	16.0075
8	RHL	2	PreDox1	13.2945
8	RHL	2	PreDox1	11.2542
8	RHL	2	PreDox1	8.27845
8	RHL	2	PreDox1	8.17467
8	RHL	2	PreDox1	7.87271
8	RHL	2	PreDox1	8.74132
8	RHL	2	PreDox1	9.63786
8	RHL	2	PreDox1	9.97471
8	RHL	2	PreDox1	10.0317
8	RHL	2	PreDox1	12.5083
8	RHL	2	PreDox1	13.6233
8	RHL	2	PreDox1	11.9535
8	RHL	2	PreDox1	12.1947
8	RHL	2	PreDox1	14.2107
8	RHL	2	PreDox1	15.1148
8	RHL	2	PreDox1	14.3914
8	RHL	2	PreDox1	14.5303
8	RHL	2	PreDox1	15.6342
8	RHL	2	PreDox1	16.7359
8	RHL	2	PreDox1	15.6462
8	RHL	2	PreDox1	13.9671
8	RHL	2	PreDox1	11.1313
8	RHL	2	PreDox1	10.2617
8	RHL	2	PreDox1	10.3508
8	RHL	2	PreDox1	9.37432
8	RHL	2	PreDox1	12.0616
8	RHL	2	PreDox1	12.8998
8	RHL	2	PreDox1	13.2936
8	RHL	2	PreDox1	14.2479
8	RHL	2	PreDox1	15.7716
8	RHL	2	PreDox1	15.3253
8	RHL	2	PreDox1	17.2775
8	RHL	2	PreDox1	15.0277
8	RHL	2	PreDox1	13.737
8	RHL	2	PreDox1	15.9856
8	RHL	2	PreDox1	16.6131
8	RHL	2	PreDox1	15.6427
8	RHL	2	PreDox1	15.6716
8	RHL	2	PreDox1	15.1928
8	RHL	2	PreDox1	15.0069
8	RHL	2	PreDox1	13.3107
8	RHL	2	PreDox1	11.9548
8	RHL	2	PreDox1	8.03265
8	RHL	2	PreDox1	6.88936
8	RHL	2	PreDox1	7.85986
8	RHL	2	PreDox1	8.1813
8	RHL	2	PreDox1	5.14943
8	RHL	2	PreDox1	8.61972
8	RHL	2	PreDox1	9.47821
8	RHL	2	PreDox1	11.0228
8	RHL	2	PreDox1	12.0638
8	RHL	2	PreDox1	11.2261
8	RHL	2	PreDox1	9.14627
8	RHL	2	PreDox1	8.69535
8	RHL	2	PreDox1	12.1295
8	RHL	2	PreDox1	12.3571
8	RHL	2	PreDox1	11.1808
8	RHL	2	PreDox1	10.496
8	RHL	2	PreDox1	11.1948
8	RHL	2	PreDox1	13.3037
8	RHL	2	PreDox1	12.021
8	RHL	2	PreDox1	10.0802
8	RHL	2	PreDox1	9.1961
8	RHL	2	PreDox1	7.0667
8	RHL	2	PreDox1	7.49791
8	RHL	2	PreDox1	7.99147
8	RHL	2	PreDox1	8.91554
8	RHL	2	PreDox1	10.2237
8	RHL	2	PreDox1	11.1688
8	RHL	2	PreDox1	12.2327
8	RHL	2	PreDox1	13.1481
8	RHL	2	PreDox1	12.9579
8	RHL	2	PreDox1	17.3665
8	RHL	2	PreDox1	11.5095
8	RHL	2	PreDox1	12.0252
8	RHL	2	PreDox1	14.2684
8	RHL	2	PreDox1	11.4408
8	RHL	2	PreDox1	10.9677
8	RHL	2	PreDox1	9.92153
8	RHL	2	PreDox1	11.5048
9	LHL	1	PreDox1	12.6393
9	LHL	1	PreDox1	19.8009
9	LHL	1	PreDox1	22.3545
9	LHL	1	PreDox1	25.3746
9	LHL	1	PreDox1	24.5909
9	LHL	1	PreDox1	21.0837
9	LHL	1	PreDox1	16.897
9	LHL	1	PreDox1	19.5242
9	LHL	1	PreDox1	23.7232
9	LHL	1	PreDox1	24.399
[truncated: 5,824 more rows]

## Sheet: Dox
animal_ID	side_ID	pass_ID	time_ID	trunk_angle
1	LHL	1	Dox1Day5	12.0318
1	LHL	1	Dox1Day5	11.4695
1	LHL	1	Dox1Day5	9.42617
1	LHL	1	Dox1Day5	8.26473
1	LHL	1	Dox1Day5	8.81238
1	LHL	1	Dox1Day5	8.96757
1	LHL	1	Dox1Day5	5.79567
1	LHL	1	Dox1Day5	8.91088
1	LHL	1	Dox1Day5	11.465
1	LHL	1	Dox1Day5	11.3194
1	LHL	1	Dox1Day5	10.4892
1	LHL	1	Dox1Day5	14.2856
1	LHL	1	Dox1Day5	13.0127
1	LHL	1	Dox1Day5	14.127
1	LHL	1	Dox1Day5	10.8216
1	LHL	1	Dox1Day5	15.4789
1	LHL	1	Dox1Day5	14.5068
1	LHL	1	Dox1Day5	14.0329
1	LHL	1	Dox1Day5	13.5454
1	LHL	1	Dox1Day5	16.3814
1	LHL	1	Dox1Day5	17.2405
1	LHL	1	Dox1Day5	17.571
1	LHL	1	Dox1Day5	13.297
1	LHL	1	Dox1Day5	11.8142
1	LHL	1	Dox1Day5	12.0561
1	LHL	1	Dox1Day5	9.81431
1	LHL	1	Dox1Day5	8.51185
1	LHL	1	Dox1Day5	12.8445
1	LHL	1	Dox1Day5	9.46692
1	LHL	1	Dox1Day5	11.2843
1	LHL	1	Dox1Day5	7.31972
1	LHL	1	Dox1Day5	8.98873
1	LHL	1	Dox1Day5	14.4443
1	LHL	1	Dox1Day5	13.8028
1	LHL	1	Dox1Day5	16.518
1	LHL	1	Dox1Day5	15.0239
1	LHL	1	Dox1Day5	17.3494
1	LHL	1	Dox1Day5	15.0751
1	LHL	1	Dox1Day5	14.3192
1	LHL	1	Dox1Day5	11.6916
1	LHL	1	Dox1Day5	14.9013
1	LHL	1	Dox1Day5	14.7686
1	LHL	1	Dox1Day5	12.1946
1	LHL	1	Dox1Day5	13.8557
1	LHL	1	Dox1Day5	17.7343
1	LHL	1	Dox1Day5	17.0761
1	LHL	1	Dox1Day5	18.5159
1	LHL	1	Dox1Day5	22.05
1	LHL	1	Dox1Day5	20.7256
1	LHL	1	Dox1Day5	14.6538
1	LHL	1	Dox1Day5	13.5616
1	LHL	1	Dox1Day5	16.0353
1	LHL	1	Dox1Day5	16.1376
1	LHL	1	Dox1Day5	16.3187
1	LHL	1	Dox1Day5	14.9013
1	LHL	1	Dox1Day5	15.535
1	LHL	1	Dox1Day5	16.3804
1	LHL	1	Dox1Day5	17.6553
1	LHL	1	Dox1Day5	18.4374
1	LHL	1	Dox1Day5	14.7022
1	LHL	1	Dox1Day5	15.0784
1	LHL	1	Dox1Day5	14.6685
1	LHL	1	Dox1Day5	14.9798
1	LHL	1	Dox1Day5	13.9344
1	LHL	1	Dox1Day5	18.015
1	LHL	1	Dox1Day5	15.732
1	LHL	1	Dox1Day5	18.5171
1	LHL	1	Dox1Day5	17.9632
1	LHL	1	Dox1Day5	17.5486
1	LHL	1	Dox1Day5	19.1291
1	LHL	1	Dox1Day5	18.518
1	LHL	1	Dox1Day5	13.4891
1	LHL	1	Dox1Day5	11.9872
1	LHL	1	Dox1Day5	15.6505
1	LHL	1	Dox1Day5	18.5197
1	LHL	1	Dox1Day5	22.0234
1	LHL	1	Dox1Day5	12.6276
1	LHL	1	Dox1Day5	15.3459
1	LHL	1	Dox1Day5	15.5685
1	LHL	1	Dox1Day5	18.2491
1	LHL	1	Dox1Day5	15.2129
1	LHL	1	Dox1Day5	17.3525
1	LHL	1	Dox1Day5	16.4351
1	LHL	1	Dox1Day5	17.4798
1	LHL	1	Dox1Day5	17.041
1	LHL	1	Dox1Day5	14.2845
1	LHL	1	Dox1Day5	15.3467
1	LHL	1	Dox1Day5	23.4421
1	LHL	1	Dox1Day5	21.8785
1	LHL	1	Dox1Day5	20.4556
1	LHL	1	Dox1Day5	15.4044
1	LHL	2	Dox1Day5	9.262
1	LHL	2	Dox1Day5	16.1235
1	LHL	2	Dox1Day5	17.0003
1	LHL	2	Dox1Day5	17.2873
1	LHL	2	Dox1Day5	15.334
1	LHL	2	Dox1Day5	11.0273
1	LHL	2	Dox1Day5	13.584
1	LHL	2	Dox1Day5	14.8797
1	LHL	2	Dox1Day5	13.6415
1	LHL	2	Dox1Day5	12.7701
1	LHL	2	Dox1Day5	9.2693
1	LHL	2	Dox1Day5	10.0523
1	LHL	2	Dox1Day5	10.8984
1	LHL	2	Dox1Day5	10.2958
1	LHL	2	Dox1Day5	8.90595
1	LHL	2	Dox1Day5	8.55094
1	LHL	2	Dox1Day5	6.56253
1	LHL	2	Dox1Day5	0.616644
1	LHL	2	Dox1Day5	1.54559
1	LHL	2	Dox1Day5	7.82685
1	LHL	2	Dox1Day5	6.85808
1	LHL	2	Dox1Day5	7.52458
1	LHL	2	Dox1Day5	11.3971
1	LHL	2	Dox1Day5	13.4419
1	LHL	2	Dox1Day5	9.51576
1	LHL	2	Dox1Day5	8.06485
1	LHL	2	Dox1Day5	6.81632
1	LHL	2	Dox1Day5	3.55261
1	LHL	2	Dox1Day5	10.3241
1	LHL	2	Dox1Day5	6.01837
1	LHL	2	Dox1Day5	5.98216
1	LHL	2	Dox1Day5	2.86941
1	LHL	2	Dox1Day5	1.19161
1	LHL	2	Dox1Day5	1.41073
1	LHL	2	Dox1Day5	4.03076
1	LHL	2	Dox1Day5	5.78026
1	LHL	2	Dox1Day5	3.83406
1	LHL	2	Dox1Day5	3.93845
1	LHL	2	Dox1Day5	5.06046
1	LHL	2	Dox1Day5	5.9233
1	LHL	2	Dox1Day5	5.78387
1	LHL	2	Dox1Day5	3.55261
1	LHL	2	Dox1Day5	0.734262
1	LHL	2	Dox1Day5	8.6527
1	LHL	2	Dox1Day5	12.0403
1	LHL	2	Dox1Day5	8.87131
1	LHL	2	Dox1Day5	10.322
1	LHL	2	Dox1Day5	10.6234
1	LHL	2	Dox1Day5	9.75469
1	LHL	2	Dox1Day5	7.69921
1	LHL	2	Dox1Day5	9.16184
1	LHL	2	Dox1Day5	10.8545
1	LHL	2	Dox1Day5	10.6277
1	LHL	2	Dox1Day5	6.6092
1	LHL	2	Dox1Day5	5.8916
1	LHL	2	Dox1Day5	8.50126
1	LHL	2	Dox1Day5	9.50038
1	LHL	2	Dox1Day5	10.2622
1	LHL	2	Dox1Day5	13.8714
1	LHL	2	Dox1Day5	13.71
1	LHL	2	Dox1Day5	10.0961
1	LHL	2	Dox1Day5	2.37296
1	LHL	2	Dox1Day5	0.091501
1	LHL	2	Dox1Day5	3.10231
1	LHL	2	Dox1Day5	5.07887
1	LHL	2	Dox1Day5	3.43663
1	LHL	2	Dox1Day5	4.29887
1	LHL	2	Dox1Day5	1.80625
1	LHL	2	Dox1Day5	7.34713
1	LHL	2	Dox1Day5	6.75705
1	LHL	2	Dox1Day5	4.46152
1	LHL	2	Dox1Day5	0.246885
1	LHL	2	Dox1Day5	0.814149
1	LHL	2	Dox1Day5	0.97445
1	LHL	2	Dox1Day5	7.04296
1	LHL	2	Dox1Day5	3.81179
1	LHL	2	Dox1Day5	4.36303
1	LHL	2	Dox1Day5	6.59514
1	LHL	2	Dox1Day5	9.06658
1	LHL	2	Dox1Day5	10.523
1	LHL	2	Dox1Day5	9.61635
1	LHL	2	Dox1Day5	8.76655
1	LHL	2	Dox1Day5	6.85627
1	LHL	2	Dox1Day5	7.18514
1	LHL	2	Dox1Day5	7.30367
1	LHL	2	Dox1Day5	9.43758
1	LHL	2	Dox1Day5	5.2306
1	LHL	2	Dox1Day5	7.72701
1	LHL	2	Dox1Day5	12.3266
1	LHL	2	Dox1Day5	13.5951
1	LHL	2	Dox1Day5	15.4844
1	LHL	2	Dox1Day5	14.781
1	LHL	2	Dox1Day5	10.019
1	LHL	2	Dox1Day5	11.1435
1	LHL	2	Dox1Day5	12.1499
1	LHL	2	Dox1Day5	10.4698
1	LHL	2	Dox1Day5	10.9699
1	LHL	2	Dox1Day5	13.3805
1	LHL	2	Dox1Day5	13.057
1	LHL	2	Dox1Day5	12.3747
1	LHL	2	Dox1Day5	12.9929
1	LHL	2	Dox1Day5	13.8684
1	LHL	2	Dox1Day5	11.333
1	LHL	2	Dox1Day5	12.4249
1	LHL	2	Dox1Day5	12.8568
1	LHL	2	Dox1Day5	15.3339
1	LHL	2	Dox1Day5	15.4309
1	LHL	2	Dox1Day5	8.84221
1	LHL	2	Dox1Day5	13.7161
1	LHL	2	Dox1Day5	19.8738
1	LHL	2	Dox1Day5	22.5926
1	LHL	2	Dox1Day5	24.8478
1	LHL	2	Dox1Day5	22.1974
1	LHL	2	Dox1Day5	9.08889
1	LHL	2	Dox1Day5	11.1085
1	LHL	2	Dox1Day5	14.0994
1	LHL	2	Dox1Day5	12.4173
1	LHL	2	Dox1Day5	13.9287
1	LHL	2	Dox1Day5	12.9968
1	LHL	2	Dox1Day5	11.2044
1	LHL	2	Dox1Day5	12.0937
1	LHL	3	Dox1Day5	10.5928
1	LHL	3	Dox1Day5	7.69648
1	LHL	3	Dox1Day5	8.39208
1	LHL	3	Dox1Day5	7.16213
1	LHL	3	Dox1Day5	6.91425
1	LHL	3	Dox1Day5	10.0556
1	LHL	3	Dox1Day5	11.089
1	LHL	3	Dox1Day5	11.4377
1	LHL	3	Dox1Day5	10.288
1	LHL	3	Dox1Day5	10.4386
1	LHL	3	Dox1Day5	7.69656
1	LHL	3	Dox1Day5	8.3051
1	LHL	3	Dox1Day5	11.0656
1	LHL	3	Dox1Day5	6.27686
1	LHL	3	Dox1Day5	4.36963
1	LHL	3	Dox1Day5	9.00247
1	LHL	3	Dox1Day5	8.55117
1	LHL	3	Dox1Day5	4.88975
1	LHL	3	Dox1Day5	7.04412
1	LHL	3	Dox1Day5	5.01157
1	LHL	3	Dox1Day5	4.5674
1	LHL	3	Dox1Day5	4.1791
1	LHL	3	Dox1Day5	4.06132
1	LHL	3	Dox1Day5	5.48669
1	LHL	3	Dox1Day5	7.44841
1	LHL	3	Dox1Day5	5.01131
1	LHL	3	Dox1Day5	4.13353
1	LHL	3	Dox1Day5	3.69802
1	LHL	3	Dox1Day5	10.1942
1	LHL	3	Dox1Day5	8.38013
1	LHL	3	Dox1Day5	7.95818
1	LHL	3	Dox1Day5	5.5587
1	LHL	3	Dox1Day5	7.36888
1	LHL	3	Dox1Day5	6.25231
1	LHL	3	Dox1Day5	7.69291
1	LHL	3	Dox1Day5	8.87679
1	LHL	3	Dox1Day5	5.48666
1	LHL	3	Dox1Day5	3.47083
1	LHL	3	Dox1Day5	3.69883
1	LHL	3	Dox1Day5	2.8287
1	LHL	3	Dox1Day5	2.53649
1	LHL	3	Dox1Day5	1.48502
1	LHL	3	Dox1Day5	4.95042
1	LHL	3	Dox1Day5	1.97092
1	LHL	3	Dox1Day5	0.648264
1	LHL	3	Dox1Day5	0.612149
1	LHL	3	Dox1Day5	0.725583
1	LHL	3	Dox1Day5	0.687218
1	LHL	3	Dox1Day5	4.89092
1	LHL	3	Dox1Day5	0.0988628
1	LHL	3	Dox1Day5	0.10226
1	LHL	3	Dox1Day5	4.89327
1	LHL	3	Dox1Day5	4.10336
1	LHL	3	Dox1Day5	5.17621
1	LHL	3	Dox1Day5	6.84358
1	LHL	3	Dox1Day5	5.70087
1	LHL	3	Dox1Day5	7.16213
1	LHL	3	Dox1Day5	10.5393
1	LHL	3	Dox1Day5	9.54424
1	LHL	3	Dox1Day5	7.16213
1	LHL	3	Dox1Day5	11.4285
1	LHL	3	Dox1Day5	10.7736
1	LHL	3	Dox1Day5	5.66253
1	LHL	3	Dox1Day5	5.20444
1	LHL	3	Dox1Day5	2.98213
1	LHL	3	Dox1Day5	4.95991
1	LHL	3	Dox1Day5	5.48637
1	LHL	3	Dox1Day5	4.54557
1	LHL	3	Dox1Day5	9.54306
1	LHL	3	Dox1Day5	9.00243
1	LHL	3	Dox1Day5	1.60694
1	LHL	3	Dox1Day5	1.86256
1	LHL	3	Dox1Day5	2.4559
1	LHL	3	Dox1Day5	0.748878
1	LHL	3	Dox1Day5	2.32699
1	LHL	3	Dox1Day5	2.24114
1	LHL	3	Dox1Day5	0.814302
1	LHL	3	Dox1Day5	1.48025
1	LHL	3	Dox1Day5	2.0661
1	LHL	3	Dox1Day5	5.76482
1	LHL	3	Dox1Day5	4.42194
1	LHL	3	Dox1Day5	2.94784
1	LHL	3	Dox1Day5	3.34492
1	LHL	3	Dox1Day5	3.89565
1	LHL	3	Dox1Day5	8.71523
1	LHL	3	Dox1Day5	8.81766
1	LHL	3	Dox1Day5	11.9275
1	LHL	3	Dox1Day5	11.005
1	LHL	3	Dox1Day5	3.55706
1	LHL	3	Dox1Day5	9.56667
1	LHL	3	Dox1Day5	3.29869
1	LHL	3	Dox1Day5	5.69934
1	LHL	3	Dox1Day5	4.00946
1	LHL	3	Dox1Day5	1.20674
1	LHL	3	Dox1Day5	0.261126
1	LHL	3	Dox1Day5	4.48315
1	LHL	3	Dox1Day5	0.967956
1	LHL	3	Dox1Day5	5.82123
1	LHL	3	Dox1Day5	0.573854
1	LHL	3	Dox1Day5	0.188418
1	LHL	3	Dox1Day5	0.548761
1	LHL	3	Dox1Day5	4.9539
1	LHL	3	Dox1Day5	3.2835
1	LHL	3	Dox1Day5	1.71667
1	LHL	3	Dox1Day5	0.556708
1	LHL	3	Dox1Day5	0.567928
1	LHL	3	Dox1Day5	1.76733
1	LHL	3	Dox1Day5	8.08348
1	LHL	3	Dox1Day5	8.6221
1	LHL	3	Dox1Day5	10.2826
1	LHL	3	Dox1Day5	5.58588
1	LHL	3	Dox1Day5	1.84883
1	LHL	3	Dox1Day5	4.62828
1	LHL	3	Dox1Day5	5.66283
1	LHL	3	Dox1Day5	1.93744
1	LHL	3	Dox1Day5	1.06514
1	LHL	3	Dox1Day5	1.08303
1	LHL	3	Dox1Day5	2.58478
1	LHL	3	Dox1Day5	2.62301
1	LHL	3	Dox1Day5	0.211046
1	LHL	3	Dox1Day5	3.37478
1	LHL	3	Dox1Day5	2.35865
1	LHL	3	Dox1Day5	0.586077
1	LHL	3	Dox1Day5	0.565491
1	LHL	3	Dox1Day5	1.4951
1	LHL	3	Dox1Day5	1.39926
1	LHL	3	Dox1Day5	2.88793
1	LHL	3	Dox1Day5	7.68863
1	LHL	3	Dox1Day5	6.67107
1	LHL	3	Dox1Day5	4.15663
1	LHL	3	Dox1Day5	2.53208
1	LHL	3	Dox1Day5	2.53208
1	LHL	3	Dox1Day5	4.42747
1	LHL	3	Dox1Day5	1.79372
1	LHL	3	Dox1Day5	2.17341
1	LHL	3	Dox1Day5	1.62304
1	LHL	3	Dox1Day5	3.65983
1	LHL	3	Dox1Day5	3.86083
1	LHL	3	Dox1Day5	9.19061
1	RHL	1	Dox1Day5	11.2132
1	RHL	1	Dox1Day5	14.0875
1	RHL	1	Dox1Day5	16.701
1	RHL	1	Dox1Day5	16.1311
1	RHL	1	Dox1Day5	16.7669
1	RHL	1	Dox1Day5	12.8215
1	RHL	1	Dox1Day5	13.265
1	RHL	1	Dox1Day5	14.5372
1	RHL	1	Dox1Day5	12.7545
1	RHL	1	Dox1Day5	10.4485
1	RHL	1	Dox1Day5	8.83255
1	RHL	1	Dox1Day5	7.05324
1	RHL	1	Dox1Day5	7.84626
1	RHL	1	Dox1Day5	9.27393
1	RHL	1	Dox1Day5	9.81674
1	RHL	1	Dox1Day5	9.06348
1	RHL	1	Dox1Day5	10.9863
1	RHL	1	Dox1Day5	9.14553
1	RHL	1	Dox1Day5	5.3824
1	RHL	1	Dox1Day5	6.59915
1	RHL	1	Dox1Day5	5.66733
1	RHL	1	Dox1Day5	8.52928
1	RHL	1	Dox1Day5	6.14031
1	RHL	1	Dox1Day5	9.42427
1	RHL	1	Dox1Day5	11.0579
1	RHL	1	Dox1Day5	14.5036
1	RHL	1	Dox1Day5	16.7176
1	RHL	1	Dox1Day5	16.2437
1	RHL	1	Dox1Day5	18.0398
1	RHL	1	Dox1Day5	16.3562
1	RHL	1	Dox1Day5	13.1057
1	RHL	1	Dox1Day5	13.9001
1	RHL	1	Dox1Day5	15.9308
1	RHL	1	Dox1Day5	14.9449
1	RHL	1	Dox1Day5	12.9758
1	RHL	1	Dox1Day5	11.8666
1	RHL	1	Dox1Day5	8.77954
1	RHL	1	Dox1Day5	11.0849
1	RHL	1	Dox1Day5	9.09522
1	RHL	1	Dox1Day5	10.4435
1	RHL	1	Dox1Day5	9.69422
1	RHL	1	Dox1Day5	9.73801
1	RHL	1	Dox1Day5	7.17996
1	RHL	1	Dox1Day5	5.14635
1	RHL	1	Dox1Day5	7.67919
1	RHL	1	Dox1Day5	3.20148
1	RHL	1	Dox1Day5	6.01031
1	RHL	1	Dox1Day5	5.22661
1	RHL	1	Dox1Day5	7.22414
1	RHL	1	Dox1Day5	11.0656
1	RHL	1	Dox1Day5	12.9153
1	RHL	1	Dox1Day5	12.5468
1	RHL	1	Dox1Day5	13.7468
1	RHL	1	Dox1Day5	15.1704
1	RHL	1	Dox1Day5	11.0302
1	RHL	1	Dox1Day5	11.7599
1	RHL	1	Dox1Day5	16.5079
1	RHL	1	Dox1Day5	11.9096
1	RHL	1	Dox1Day5	13.8674
1	RHL	1	Dox1Day5	10.1549
1	RHL	1	Dox1Day5	7.52374
1	RHL	1	Dox1Day5	7.33626
1	RHL	1	Dox1Day5	9.22137
1	RHL	1	Dox1Day5	11.5137
1	RHL	1	Dox1Day5	11.2366
1	RHL	1	Dox1Day5	9.30526
1	RHL	1	Dox1Day5	6.13678
1	RHL	1	Dox1Day5	3.8782
1	RHL	1	Dox1Day5	3.33851
1	RHL	1	Dox1Day5	8.02086
1	RHL	1	Dox1Day5	5.8958
1	RHL	1	Dox1Day5	8.97551
1	RHL	1	Dox1Day5	11.1258
1	RHL	1	Dox1Day5	11.6888
1	RHL	1	Dox1Day5	9.25585
1	RHL	1	Dox1Day5	13.231
1	RHL	1	Dox1Day5	15.8138
1	RHL	1	Dox1Day5	15.26
1	RHL	1	Dox1Day5	11.3258
1	RHL	1	Dox1Day5	12.4937
1	RHL	1	Dox1Day5	13.7003
1	RHL	1	Dox1Day5	12.8839
1	RHL	1	Dox1Day5	9.74441
1	RHL	1	Dox1Day5	8.67722
1	RHL	1	Dox1Day5	12.2172
1	RHL	1	Dox1Day5	10.9385
1	RHL	1	Dox1Day5	9.1591
1	RHL	1	Dox1Day5	9.01043
1	RHL	1	Dox1Day5	7.81421
1	RHL	1	Dox1Day5	5.5442
1	RHL	1	Dox1Day5	2.59955
1	RHL	1	Dox1Day5	0.36386
1	RHL	1	Dox1Day5	2.6796
1	RHL	1	Dox1Day5	0.436001
1	RHL	1	Dox1Day5	1.12393
1	RHL	1	Dox1Day5	4.9502
1	RHL	1	Dox1Day5	4.7303
1	RHL	1	Dox1Day5	9.14071
1	RHL	1	Dox1Day5	8.69673
1	RHL	1	Dox1Day5	13.9498
1	RHL	1	Dox1Day5	11.3351
1	RHL	1	Dox1Day5	10.2328
1	RHL	1	Dox1Day5	4.56148
1	RHL	1	Dox1Day5	7.45457
1	RHL	1	Dox1Day5	11.6517
1	RHL	1	Dox1Day5	6.9467
1	RHL	1	Dox1Day5	4.55165
1	RHL	1	Dox1Day5	3.06001
1	RHL	1	Dox1Day5	2.64088
1	RHL	1	Dox1Day5	0.422277
1	RHL	1	Dox1Day5	3.50626
1	RHL	1	Dox1Day5	2.0214
1	RHL	1	Dox1Day5	0.763513
1	RHL	1	Dox1Day5	2.44357
1	RHL	1	Dox1Day5	1.75671
1	RHL	1	Dox1Day5	3.97962
1	RHL	1	Dox1Day5	0.269024
1	RHL	1	Dox1Day5	2.16663
1	RHL	1	Dox1Day5	0.684389
1	RHL	1	Dox1Day5	0.687177
1	RHL	1	Dox1Day5	3.21322
1	RHL	1	Dox1Day5	6.86364
1	RHL	1	Dox1Day5	6.16033
1	RHL	1	Dox1Day5	9.97456
1	RHL	1	Dox1Day5	13.1533
1	RHL	1	Dox1Day5	11.7684
1	RHL	1	Dox1Day5	10.4265
1	RHL	1	Dox1Day5	9.85353
1	RHL	1	Dox1Day5	11.1932
1	RHL	1	Dox1Day5	12.4237
1	RHL	1	Dox1Day5	9.4246
1	RHL	1	Dox1Day5	6.26349
1	RHL	1	Dox1Day5	2.65588
1	RHL	1	Dox1Day5	6.42444
1	RHL	1	Dox1Day5	2.66471
1	RHL	1	Dox1Day5	6.87139
1	RHL	1	Dox1Day5	2.38261
1	RHL	1	Dox1Day5	8.22282
1	RHL	1	Dox1Day5	6.94892
1	RHL	1	Dox1Day5	4.59487
1	RHL	1	Dox1Day5	2.67208
1	RHL	1	Dox1Day5	2.80371
1	RHL	1	Dox1Day5	4.55095
1	RHL	1	Dox1Day5	1.21196
1	RHL	1	Dox1Day5	4.74004
1	RHL	1	Dox1Day5	7.23744
1	RHL	1	Dox1Day5	12.8926
1	RHL	1	Dox1Day5	15.239
1	RHL	1	Dox1Day5	16.1673
1	RHL	1	Dox1Day5	14.437
1	RHL	1	Dox1Day5	7.65015
1	RHL	1	Dox1Day5	10.9295
1	RHL	1	Dox1Day5	11.4727
1	RHL	1	Dox1Day5	11.7937
1	RHL	1	Dox1Day5	8.03457
1	RHL	1	Dox1Day5	4.85874
1	RHL	1	Dox1Day5	3.80086
1	RHL	1	Dox1Day5	6.29102
1	RHL	2	Dox1Day5	15.7742
1	RHL	2	Dox1Day5	15.1313
1	RHL	2	Dox1Day5	18.0983
1	RHL	2	Dox1Day5	16.8948
1	RHL	2	Dox1Day5	15.2911
1	RHL	2	Dox1Day5	15.4389
1	RHL	2	Dox1Day5	11.2119
1	RHL	2	Dox1Day5	14.0452
1	RHL	2	Dox1Day5	11.8255
1	RHL	2	Dox1Day5	6.6534
1	RHL	2	Dox1Day5	6.66249
1	RHL	2	Dox1Day5	6.34014
1	RHL	2	Dox1Day5	6.94886
1	RHL	2	Dox1Day5	7.46175
1	RHL	2	Dox1Day5	8.66244
1	RHL	2	Dox1Day5	7.50858
1	RHL	2	Dox1Day5	5.49247
1	RHL	2	Dox1Day5	5.19664
1	RHL	2	Dox1Day5	6.73916
1	RHL	2	Dox1Day5	0.70629
1	RHL	2	Dox1Day5	3.48072
1	RHL	2	Dox1Day5	5.99788
1	RHL	2	Dox1Day5	8.31825
1	RHL	2	Dox1Day5	8.99806
1	RHL	2	Dox1Day5	10.5401
1	RHL	2	Dox1Day5	12.1671
1	RHL	2	Dox1Day5	13.638
1	RHL	2	Dox1Day5	15.2881
1	RHL	2	Dox1Day5	14.4063
1	RHL	2	Dox1Day5	12.1671
1	RHL	2	Dox1Day5	10.0392
1	RHL	2	Dox1Day5	9.49215
1	RHL	2	Dox1Day5	12.3465
1	RHL	2	Dox1Day5	10.6801
1	RHL	2	Dox1Day5	6.65352
1	RHL	2	Dox1Day5	4.99846
1	RHL	2	Dox1Day5	6.2488
1	RHL	2	Dox1Day5	5.73853
1	RHL	2	Dox1Day5	6.04998
1	RHL	2	Dox1Day5	7.66265
1	RHL	2	Dox1Day5	5.32845
1	RHL	2	Dox1Day5	3.67926
1	RHL	2	Dox1Day5	4.66528
1	RHL	2	Dox1Day5	4.48059
1	RHL	2	Dox1Day5	4.30983
1	RHL	2	Dox1Day5	5.97559
1	RHL	2	Dox1Day5	9.04812
1	RHL	2	Dox1Day5	12.0477
1	RHL	2	Dox1Day5	14.1191
1	RHL	2	Dox1Day5	17.1827
1	RHL	2	Dox1Day5	18.025
1	RHL	2	Dox1Day5	18.4708
1	RHL	2	Dox1Day5	17.0639
1	RHL	2	Dox1Day5	12.7156
1	RHL	2	Dox1Day5	12.7912
1	RHL	2	Dox1Day5	15.9344
1	RHL	2	Dox1Day5	14.834
1	RHL	2	Dox1Day5	10.8259
1	RHL	2	Dox1Day5	5.23619
1	RHL	2	Dox1Day5	6.57043
1	RHL	2	Dox1Day5	6.40199
1	RHL	2	Dox1Day5	4.79238
1	RHL	2	Dox1Day5	8.7849
1	RHL	2	Dox1Day5	9.67741
1	RHL	2	Dox1Day5	7.90568
1	RHL	2	Dox1Day5	7.04339
1	RHL	2	Dox1Day5	4.60206
1	RHL	2	Dox1Day5	4.48059
1	RHL	2	Dox1Day5	4.60206
1	RHL	2	Dox1Day5	7.10671
1	RHL	2	Dox1Day5	5.97565
1	RHL	2	Dox1Day5	8.02078
1	RHL	2	Dox1Day5	10.0744
1	RHL	2	Dox1Day5	12.8416
1	RHL	2	Dox1Day5	13.6379
1	RHL	2	Dox1Day5	14.1926
1	RHL	2	Dox1Day5	13.3203
1	RHL	2	Dox1Day5	9.37626
1	RHL	2	Dox1Day5	10.9897
1	RHL	2	Dox1Day5	12.9723
1	RHL	2	Dox1Day5	11.646
1	RHL	2	Dox1Day5	6.2599
1	RHL	2	Dox1Day5	6.42761
1	RHL	2	Dox1Day5	9.08752
1	RHL	2	Dox1Day5	5.42892
1	RHL	2	Dox1Day5	6.99296
1	RHL	2	Dox1Day5	7.87379
1	RHL	2	Dox1Day5	5.7899
1	RHL	2	Dox1Day5	3.88079
1	RHL	2	Dox1Day5	2.31247
1	RHL	2	Dox1Day5	2.22174
1	RHL	2	Dox1Day5	1.50848
1	RHL	2	Dox1Day5	0.833385
1	RHL	2	Dox1Day5	3.14642
1	RHL	2	Dox1Day5	3.10295
1	RHL	2	Dox1Day5	6.13676
1	RHL	2	Dox1Day5	10.2661
1	RHL	2	Dox1Day5	12.8416
1	RHL	2	Dox1Day5	14.1926
1	RHL	2	Dox1Day5	16.5874
1	RHL	2	Dox1Day5	13.2756
1	RHL	2	Dox1Day5	11.6003
1	RHL	2	Dox1Day5	8.65377
1	RHL	2	Dox1Day5	12.6929
1	RHL	2	Dox1Day5	10.3082
1	RHL	2	Dox1Day5	6.25212
1	RHL	2	Dox1Day5	3.9671
1	RHL	2	Dox1Day5	3.4338
1	RHL	2	Dox1Day5	3.06067
1	RHL	2	Dox1Day5	4.06157
1	RHL	2	Dox1Day5	6.22061
1	RHL	2	Dox1Day5	6.28039
1	RHL	2	Dox1Day5	7.83376
1	RHL	2	Dox1Day5	3.58538
1	RHL	2	Dox1Day5	1.37245
1	RHL	2	Dox1Day5	0.275897
1	RHL	2	Dox1Day5	3.14642
1	RHL	2	Dox1Day5	5.66076
1	RHL	2	Dox1Day5	5.55059
1	RHL	2	Dox1Day5	8.45558
1	RHL	2	Dox1Day5	11.532
1	RHL	2	Dox1Day5	15.1921
1	RHL	2	Dox1Day5	15.7516
1	RHL	2	Dox1Day5	17.5412
1	RHL	2	Dox1Day5	16.1525
1	RHL	2	Dox1Day5	15.2373
1	RHL	2	Dox1Day5	12.098
1	RHL	2	Dox1Day5	12.8337
1	RHL	2	Dox1Day5	14.5762
1	RHL	2	Dox1Day5	13.8896
1	RHL	2	Dox1Day5	8.48506
1	RHL	2	Dox1Day5	8.78084
1	RHL	2	Dox1Day5	6.76517
1	RHL	2	Dox1Day5	6.29168
1	RHL	2	Dox1Day5	6.21139
1	RHL	2	Dox1Day5	5.52006
1	RHL	2	Dox1Day5	5.06639
1	RHL	2	Dox1Day5	7.28338
1	RHL	2	Dox1Day5	3.81138
1	RHL	2	Dox1Day5	2.94895
1	RHL	2	Dox1Day5	3.33307
1	RHL	2	Dox1Day5	3.33308
1	RHL	2	Dox1Day5	6.05182
1	RHL	2	Dox1Day5	7.54976
1	RHL	2	Dox1Day5	8.84726
1	RHL	2	Dox1Day5	9.61201
1	RHL	2	Dox1Day5	11.0715
1	RHL	2	Dox1Day5	15.0141
1	RHL	2	Dox1Day5	11.1434
1	RHL	2	Dox1Day5	12.691
1	RHL	2	Dox1Day5	10.036
1	RHL	2	Dox1Day5	11.1625
1	RHL	2	Dox1Day5	10.9025
1	RHL	2	Dox1Day5	10.4897
1	RHL	2	Dox1Day5	11.6788
1	RHL	2	Dox1Day5	0.807189
1	RHL	2	Dox1Day5	2.36599
1	RHL	2	Dox1Day5	3.74217
1	RHL	2	Dox1Day5	7.05359
1	RHL	2	Dox1Day5	6.87786
1	RHL	2	Dox1Day5	7.26713
1	RHL	2	Dox1Day5	3.87557
1	RHL	2	Dox1Day5	2.11429
1	RHL	2	Dox1Day5	0.647676
1	RHL	2	Dox1Day5	1.09424
1	RHL	2	Dox1Day5	0.973959
1	RHL	3	Dox1Day5	11.79
1	RHL	3	Dox1Day5	9.82637
1	RHL	3	Dox1Day5	9.46407
1	RHL	3	Dox1Day5	9.43266
1	RHL	3	Dox1Day5	8.24809
1	RHL	3	Dox1Day5	7.95978
1	RHL	3	Dox1Day5	7.86027
1	RHL	3	Dox1Day5	7.00381
1	RHL	3	Dox1Day5	6.99981
1	RHL	3	Dox1Day5	6.30683
1	RHL	3	Dox1Day5	5.97559
1	RHL	3	Dox1Day5	8.27738
1	RHL	3	Dox1Day5	9.10765
1	RHL	3	Dox1Day5	11.5184
1	RHL	3	Dox1Day5	13.638
1	RHL	3	Dox1Day5	15.7168
1	RHL	3	Dox1Day5	16.8541
1	RHL	3	Dox1Day5	16.8409
1	RHL	3	Dox1Day5	15.0906
1	RHL	3	Dox1Day5	14.0365
1	RHL	3	Dox1Day5	11.3284
1	RHL	3	Dox1Day5	12.0779
1	RHL	3	Dox1Day5	11.9739
1	RHL	3	Dox1Day5	11.975
1	RHL	3	Dox1Day5	11.4347
1	RHL	3	Dox1Day5	9.1724
1	RHL	3	Dox1Day5	8.38157
1	RHL	3	Dox1Day5	7.95106
1	RHL	3	Dox1Day5	9.32467
1	RHL	3	Dox1Day5	8.19823
1	RHL	3	Dox1Day5	8.00856
1	RHL	3	Dox1Day5	7.07621
1	RHL	3	Dox1Day5	6.54706
1	RHL	3	Dox1Day5	5.95686
1	RHL	3	Dox1Day5	3.4031
1	RHL	3	Dox1Day5	3.98814
1	RHL	3	Dox1Day5	2.80803
1	RHL	3	Dox1Day5	7.0018
1	RHL	3	Dox1Day5	7.06826
1	RHL	3	Dox1Day5	7.83
1	RHL	3	Dox1Day5	11.5806
1	RHL	3	Dox1Day5	13.3395
1	RHL	3	Dox1Day5	12.6481
1	RHL	3	Dox1Day5	12.2346
1	RHL	3	Dox1Day5	10.6243
1	RHL	3	Dox1Day5	10.5813
1	RHL	3	Dox1Day5	9.98829
1	RHL	3	Dox1Day5	7.97934
1	RHL	3	Dox1Day5	6.02655
1	RHL	3	Dox1Day5	3.38043
1	RHL	3	Dox1Day5	4.20463
1	RHL	3	Dox1Day5	3.97666
1	RHL	3	Dox1Day5	5.21301
1	RHL	3	Dox1Day5	5.46844
1	RHL	3	Dox1Day5	5.11083
1	RHL	3	Dox1Day5	2.9867
1	RHL	3	Dox1Day5	1.42764
1	RHL	3	Dox1Day5	3.11053
1	RHL	3	Dox1Day5	1.2469
1	RHL	3	Dox1Day5	1.47674
1	RHL	3	Dox1Day5	2.39203
1	RHL	3	Dox1Day5	0.0634543
1	RHL	3	Dox1Day5	2.54832
1	RHL	3	Dox1Day5	5.44522
1	RHL	3	Dox1Day5	9.35542
1	RHL	3	Dox1Day5	9.32441
1	RHL	3	Dox1Day5	10.7568
1	RHL	3	Dox1Day5	11.7557
1	RHL	3	Dox1Day5	15.3447
1	RHL	3	Dox1Day5	15.4847
1	RHL	3	Dox1Day5	11.9509
1	RHL	3	Dox1Day5	7.99622
1	RHL	3	Dox1Day5	6.36382
1	RHL	3	Dox1Day5	10.1126
1	RHL	3	Dox1Day5	5.81421
1	RHL	3	Dox1Day5	5.97564
1	RHL	3	Dox1Day5	5.60489
1	RHL	3	Dox1Day5	5.58453
1	RHL	3	Dox1Day5	5.10196
1	RHL	3	Dox1Day5	4.95689
1	RHL	3	Dox1Day5	5.67921
1	RHL	3	Dox1Day5	4.85996
1	RHL	3	Dox1Day5	6.36246
1	RHL	3	Dox1Day5	5.3858
1	RHL	3	Dox1Day5	1.41569
1	RHL	3	Dox1Day5	4.45258
1	RHL	3	Dox1Day5	2.46906
1	RHL	3	Dox1Day5	3.74266
1	RHL	3	Dox1Day5	3.72287
1	RHL	3	Dox1Day5	3.18
1	RHL	3	Dox1Day5	5.58915
1	RHL	3	Dox1Day5	9.52887
1	RHL	3	Dox1Day5	11.6307
1	RHL	3	Dox1Day5	12.7716
1	RHL	3	Dox1Day5	12.3185
1	RHL	3	Dox1Day5	14.5476
1	RHL	3	Dox1Day5	9.83945
1	RHL	3	Dox1Day5	8.91432
1	RHL	3	Dox1Day5	9.00321
1	RHL	3	Dox1Day5	7.17776
1	RHL	3	Dox1Day5	7.18361
1	RHL	3	Dox1Day5	4.64711
1	RHL	3	Dox1Day5	6.03807
1	RHL	3	Dox1Day5	6.0838
1	RHL	3	Dox1Day5	4.55926
1	RHL	3	Dox1Day5	4.39912
1	RHL	3	Dox1Day5	2.50568
1	RHL	3	Dox1Day5	2.53602
1	RHL	3	Dox1Day5	0.158951
1	RHL	3	Dox1Day5	1.05304
1	RHL	3	Dox1Day5	1.90758
1	RHL	3	Dox1Day5	3.0863
1	RHL	3	Dox1Day5	1.68772
1	RHL	3	Dox1Day5	2.70121
1	RHL	3	Dox1Day5	0.629706
1	RHL	3	Dox1Day5	2.38811
1	RHL	3	Dox1Day5	3.26106
1	RHL	3	Dox1Day5	6.4727
1	RHL	3	Dox1Day5	7.0419
1	RHL	3	Dox1Day5	10.0557
1	RHL	3	Dox1Day5	10.2715
1	RHL	3	Dox1Day5	9.91115
1	RHL	3	Dox1Day5	7.12913
1	RHL	3	Dox1Day5	4.62043
1	RHL	3	Dox1Day5	7.2238
1	RHL	3	Dox1Day5	6.27874
1	RHL	3	Dox1Day5	5.40048
1	RHL	3	Dox1Day5	4.59465
1	RHL	3	Dox1Day5	3.29946
1	RHL	3	Dox1Day5	2.89703
1	RHL	3	Dox1Day5	4.074
1	RHL	3	Dox1Day5	3.12313
1	RHL	3	Dox1Day5	3.60798
1	RHL	3	Dox1Day5	1.82348
1	RHL	3	Dox1Day5	2.69558
1	RHL	3	Dox1Day5	1.6493
1	RHL	3	Dox1Day5	1.4158
1	RHL	3	Dox1Day5	1.57275
1	RHL	3	Dox1Day5	1.45667
1	RHL	3	Dox1Day5	3.75392
1	RHL	3	Dox1Day5	5.08392
1	RHL	3	Dox1Day5	8.42672
1	RHL	3	Dox1Day5	9.77739
1	RHL	3	Dox1Day5	10.3627
1	RHL	3	Dox1Day5	12.691
1	RHL	3	Dox1Day5	12.0269
1	RHL	3	Dox1Day5	12.4163
1	RHL	3	Dox1Day5	11.2514
1	RHL	3	Dox1Day5	9.02937
1	RHL	3	Dox1Day5	8.10763
1	RHL	3	Dox1Day5	6.2165
1	RHL	3	Dox1Day5	3.64491
1	RHL	3	Dox1Day5	3.44697
2	LHL	1	Dox1Day5	20.6677
2	LHL	1	Dox1Day5	22.3774
2	LHL	1	Dox1Day5	23.7683
2	LHL	1	Dox1Day5	23.8336
2	LHL	1	Dox1Day5	26.3498
2	LHL	1	Dox1Day5	23.224
2	LHL	1	Dox1Day5	25.9784
2	LHL	1	Dox1Day5	25.3045
2	LHL	1	Dox1Day5	21.1569
2	LHL	1	Dox1Day5	20.2568
2	LHL	1	Dox1Day5	18.5376
2	LHL	1	Dox1Day5	15.9171
2	LHL	1	Dox1Day5	8.01349
2	LHL	1	Dox1Day5	5.87888
2	LHL	1	Dox1Day5	9.66317
2	LHL	1	Dox1Day5	11.1673
2	LHL	1	Dox1Day5	12.6333
2	LHL	1	Dox1Day5	12.2618
2	LHL	1	Dox1Day5	12.6332
2	LHL	1	Dox1Day5	12.5443
2	LHL	1	Dox1Day5	14.124
2	LHL	1	Dox1Day5	12.4468
2	LHL	1	Dox1Day5	9.98514
2	LHL	1	Dox1Day5	14.0644
2	LHL	1	Dox1Day5	16.4464
2	LHL	1	Dox1Day5	15.0768
2	LHL	1	Dox1Day5	14.2502
2	LHL	1	Dox1Day5	16.2187
2	LHL	1	Dox1Day5	11.9332
2	LHL	1	Dox1Day5	19.386
2	LHL	1	Dox1Day5	21.6008
2	LHL	1	Dox1Day5	19.582
2	LHL	1	Dox1Day5	20.5694
2	LHL	1	Dox1Day5	22.2747
2	LHL	1	Dox1Day5	23.5807
2	LHL	1	Dox1Day5	23.0142
2	LHL	1	Dox1Day5	23.6843
2	LHL	1	Dox1Day5	25.5269
2	LHL	1	Dox1Day5	27.2106
2	LHL	1	Dox1Day5	25.0834
2	LHL	1	Dox1Day5	19.4855
2	LHL	1	Dox1Day5	22.4593
2	LHL	1	Dox1Day5	21.5099
2	LHL	1	Dox1Day5	22.3393
2	LHL	1	Dox1Day5	21.035
2	LHL	1	Dox1Day5	20.658
2	LHL	1	Dox1Day5	25.2358
2	LHL	1	Dox1Day5	22.6295
2	LHL	1	Dox1Day5	22.0883
2	LHL	1	Dox1Day5	20.0832
2	LHL	1	Dox1Day5	19.4897
2	LHL	1	Dox1Day5	17.8664
2	LHL	1	Dox1Day5	13.5518
2	LHL	1	Dox1Day5	20.7247
2	LHL	1	Dox1Day5	18.5114
2	LHL	1	Dox1Day5	24.1947
2	LHL	1	Dox1Day5	28.2812
2	LHL	1	Dox1Day5	32.7488
2	LHL	1	Dox1Day5	28.9512
2	LHL	1	Dox1Day5	30.4429
2	LHL	1	Dox1Day5	24.3397
2	LHL	1	Dox1Day5	24.659
2	LHL	1	Dox1Day5	24.0283
2	LHL	1	Dox1Day5	26.3904
2	LHL	1	Dox1Day5	27.4662
2	LHL	1	Dox1Day5	25.4487
2	LHL	1	Dox1Day5	20.1462
2	LHL	1	Dox1Day5	19.4809
2	LHL	1	Dox1Day5	22.5843
2	LHL	1	Dox1Day5	19.4364
2	LHL	1	Dox1Day5	21.5234
2	LHL	1	Dox1Day5	23.9674
2	LHL	1	Dox1Day5	13.9453
2	LHL	1	Dox1Day5	15.8225
2	LHL	1	Dox1Day5	14.7551
2	LHL	1	Dox1Day5	18.2518
2	LHL	1	Dox1Day5	17.0517
2	LHL	1	Dox1Day5	18.0011
2	LHL	1	Dox1Day5	17.3232
2	LHL	1	Dox1Day5	18.745
2	LHL	1	Dox1Day5	21.8194
2	LHL	1	Dox1Day5	17.9309
2	LHL	1	Dox1Day5	16.455
2	LHL	1	Dox1Day5	18.2254
2	LHL	1	Dox1Day5	16.1158
2	LHL	1	Dox1Day5	18.4846
2	LHL	1	Dox1Day5	17.9588
2	LHL	1	Dox1Day5	16.4551
2	LHL	1	Dox1Day5	21.6638
2	LHL	1	Dox1Day5	18.4818
2	LHL	1	Dox1Day5	18.4824
2	LHL	1	Dox1Day5	15.1796
2	LHL	1	Dox1Day5	19.8672
2	LHL	1	Dox1Day5	14.1261
2	LHL	1	Dox1Day5	14.7042
2	LHL	1	Dox1Day5	18.1112
2	LHL	1	Dox1Day5	14.8026
2	LHL	1	Dox1Day5	15.0659
2	LHL	1	Dox1Day5	13.8266
2	LHL	1	Dox1Day5	9.08206
2	LHL	1	Dox1Day5	6.63698
2	LHL	1	Dox1Day5	12.4174
2	LHL	1	Dox1Day5	16.7023
2	LHL	1	Dox1Day5	15.3925
2	LHL	1	Dox1Day5	16.898
2	LHL	1	Dox1Day5	16.7139
2	LHL	1	Dox1Day5	16.8991
2	LHL	1	Dox1Day5	15.9792
2	LHL	1	Dox1Day5	15.9782
2	LHL	1	Dox1Day5	16.4626
2	LHL	1	Dox1Day5	18.4241
2	LHL	1	Dox1Day5	17.3618
2	LHL	1	Dox1Day5	16.9482
2	LHL	1	Dox1Day5	15.3824
2	LHL	1	Dox1Day5	13.2803
2	LHL	1	Dox1Day5	14.1102
2	LHL	1	Dox1Day5	10.9224
2	LHL	1	Dox1Day5	13.2278
2	LHL	1	Dox1Day5	13.652
2	LHL	1	Dox1Day5	15.6774
2	LHL	1	Dox1Day5	14.9137
2	LHL	1	Dox1Day5	13.5381
2	LHL	1	Dox1Day5	10.3735
2	LHL	1	Dox1Day5	15.629
2	LHL	1	Dox1Day5	14.9136
2	LHL	1	Dox1Day5	17.6348
2	LHL	1	Dox1Day5	18.758
2	LHL	1	Dox1Day5	17.528
2	LHL	1	Dox1Day5	17.8144
2	LHL	1	Dox1Day5	21.8865
2	LHL	1	Dox1Day5	22.3852
2	LHL	1	Dox1Day5	21.5501
2	LHL	1	Dox1Day5	20.6018
2	LHL	1	Dox1Day5	24.3627
2	LHL	1	Dox1Day5	25.5028
2	LHL	1	Dox1Day5	20.3943
2	LHL	1	Dox1Day5	17.3083
2	LHL	1	Dox1Day5	18.7252
2	LHL	1	Dox1Day5	22.5893
2	LHL	1	Dox1Day5	24.3831
2	LHL	1	Dox1Day5	21.3674
2	LHL	1	Dox1Day5	23.4484
2	LHL	1	Dox1Day5	18.999
2	LHL	1	Dox1Day5	14.8522
2	LHL	1	Dox1Day5	16.5977
2	LHL	1	Dox1Day5	16.4064
2	LHL	1	Dox1Day5	15.2224
2	LHL	1	Dox1Day5	17.8456
2	LHL	1	Dox1Day5	18.4164
2	LHL	1	Dox1Day5	18.4035
2	LHL	1	Dox1Day5	21.7119
2	LHL	1	Dox1Day5	24.1243
2	LHL	1	Dox1Day5	20.6033
2	LHL	1	Dox1Day5	15.9729
2	LHL	1	Dox1Day5	17.4142
2	LHL	1	Dox1Day5	16.2462
2	LHL	1	Dox1Day5	13.1639
2	LHL	1	Dox1Day5	16.8979
2	LHL	1	Dox1Day5	11.8509
2	LHL	1	Dox1Day5	14.6
2	LHL	1	Dox1Day5	14.3521
2	LHL	1	Dox1Day5	12.5325
2	LHL	1	Dox1Day5	14.1084
2	LHL	1	Dox1Day5	13.3885
2	LHL	1	Dox1Day5	14.348
2	LHL	1	Dox1Day5	8.6277
2	LHL	1	Dox1Day5	7.47995
2	LHL	1	Dox1Day5	3.11815
2	LHL	1	Dox1Day5	3.17139
2	LHL	1	Dox1Day5	2.93947
2	LHL	1	Dox1Day5	6.25548
2	LHL	1	Dox1Day5	4.10173
2	LHL	1	Dox1Day5	6.66882
2	LHL	1	Dox1Day5	7.9314
2	LHL	1	Dox1Day5	9.31426
2	LHL	1	Dox1Day5	13.2745
2	LHL	1	Dox1Day5	17.8144
2	LHL	1	Dox1Day5	14.1125
2	LHL	1	Dox1Day5	14.1106
2	LHL	1	Dox1Day5	12.5201
2	LHL	1	Dox1Day5	10.5695
2	LHL	1	Dox1Day5	10.8811
2	LHL	1	Dox1Day5	14.0363
2	LHL	1	Dox1Day5	15.9785
2	LHL	1	Dox1Day5	16.8239
2	LHL	1	Dox1Day5	14.8522
2	LHL	2	Dox1Day5	16.1202
2	LHL	2	Dox1Day5	15.5041
2	LHL	2	Dox1Day5	18.6211
2	LHL	2	Dox1Day5	20.3638
2	LHL	2	Dox1Day5	20.6416
2	LHL	2	Dox1Day5	22.1469
2	LHL	2	Dox1Day5	19.8902
2	LHL	2	Dox1Day5	18.6109
2	LHL	2	Dox1Day5	20.2873
2	LHL	2	Dox1Day5	22.6096
2	LHL	2	Dox1Day5	22.8113
2	LHL	2	Dox1Day5	26.3513
2	LHL	2	Dox1Day5	20.8517
2	LHL	2	Dox1Day5	22.7545
2	LHL	2	Dox1Day5	20.5445
2	LHL	2	Dox1Day5	16.5777
2	LHL	2	Dox1Day5	16.8103
2	LHL	2	Dox1Day5	18.3691
2	LHL	2	Dox1Day5	15.2334
2	LHL	2	Dox1Day5	14.2299
2	LHL	2	Dox1Day5	15.3028
2	LHL	2	Dox1Day5	14.0329
2	LHL	2	Dox1Day5	14.9021
2	LHL	2	Dox1Day5	17.1147
2	LHL	2	Dox1Day5	17.5927
2	LHL	2	Dox1Day5	16.3513
2	LHL	2	Dox1Day5	14.3817
2	LHL	2	Dox1Day5	13.7189
2	LHL	2	Dox1Day5	14.3817
2	LHL	2	Dox1Day5	12.8564
2	LHL	2	Dox1Day5	16.3202
2	LHL	2	Dox1Day5	15.7342
2	LHL	2	Dox1Day5	15.548
2	LHL	2	Dox1Day5	16.8031
2	LHL	2	Dox1Day5	19.3575
2	LHL	2	Dox1Day5	20.4506
2	LHL	2	Dox1Day5	20.6416
2	LHL	2	Dox1Day5	24.2923
2	LHL	2	Dox1Day5	20.6375
2	LHL	2	Dox1Day5	19.8294
2	LHL	2	Dox1Day5	19.5722
2	LHL	2	Dox1Day5	16.7332
2	LHL	2	Dox1Day5	15.4523
2	LHL	2	Dox1Day5	17.0495
2	LHL	2	Dox1Day5	16.3513
2	LHL	2	Dox1Day5	17.2953
2	LHL	2	Dox1Day5	15.5032
2	LHL	2	Dox1Day5	16.6702
2	LHL	2	Dox1Day5	20.5512
2	LHL	2	Dox1Day5	20.3659
2	LHL	2	Dox1Day5	20.7412
2	LHL	2	Dox1Day5	18.8399
2	LHL	2	Dox1Day5	17.7282
2	LHL	2	Dox1Day5	18.1283
2	LHL	2	Dox1Day5	17.8083
2	LHL	2	Dox1Day5	17.8382
2	LHL	2	Dox1Day5	18.357
2	LHL	2	Dox1Day5	17.6645
2	LHL	2	Dox1Day5	18.1283
2	LHL	2	Dox1Day5	16.8032
2	LHL	2	Dox1Day5	19.1019
2	LHL	2	Dox1Day5	23.6168
2	LHL	2	Dox1Day5	17.6645
2	LHL	2	Dox1Day5	17.8935
2	LHL	2	Dox1Day5	17.0495
2	LHL	2	Dox1Day5	13.8421
2	LHL	2	Dox1Day5	13.2968
2	LHL	2	Dox1Day5	12.8893
2	LHL	2	Dox1Day5	13.3941
2	LHL	2	Dox1Day5	12.7204
2	LHL	2	Dox1Day5	15.231
2	LHL	2	Dox1Day5	14.8551
2	LHL	2	Dox1Day5	13.8268
2	LHL	2	Dox1Day5	12.1211
2	LHL	2	Dox1Day5	13.4729
2	LHL	2	Dox1Day5	14.6119
2	LHL	2	Dox1Day5	12.3887
2	LHL	2	Dox1Day5	14.7733
2	LHL	2	Dox1Day5	14.9684
2	LHL	2	Dox1Day5	17.3504
2	LHL	2	Dox1Day5	16.0208
2	LHL	2	Dox1Day5	11.4996
2	LHL	2	Dox1Day5	16.9505
2	LHL	2	Dox1Day5	19.0544
2	LHL	2	Dox1Day5	20.2458
2	LHL	2	Dox1Day5	17.6645
2	LHL	2	Dox1Day5	19.2601
2	LHL	2	Dox1Day5	21.2674
2	LHL	2	Dox1Day5	23.4831
2	LHL	2	Dox1Day5	22.2605
2	LHL	2	Dox1Day5	18.87
2	LHL	2	Dox1Day5	19.9566
2	LHL	2	Dox1Day5	23.8103
2	LHL	2	Dox1Day5	20.6448
2	LHL	2	Dox1Day5	21.6713
2	LHL	2	Dox1Day5	20.7458
2	LHL	2	Dox1Day5	18.8711
2	LHL	2	Dox1Day5	18.3692
2	LHL	2	Dox1Day5	19.6729
2	LHL	2	Dox1Day5	20.1688
2	LHL	2	Dox1Day5	16.6614
2	LHL	2	Dox1Day5	17.5927
2	LHL	2	Dox1Day5	20.0277
2	LHL	2	Dox1Day5	14.1383
2	LHL	2	Dox1Day5	18.3822
2	LHL	2	Dox1Day5	13.482
2	LHL	2	Dox1Day5	17.2309
2	LHL	2	Dox1Day5	14.1422
2	LHL	2	Dox1Day5	18.3861
2	LHL	2	Dox1Day5	17.5757
2	LHL	2	Dox1Day5	19.0352
2	LHL	2	Dox1Day5	16.868
2	LHL	2	Dox1Day5	23.4522
2	LHL	2	Dox1Day5	24.5437
2	LHL	2	Dox1Day5	20.4629
2	LHL	2	Dox1Day5	13.2425
2	LHL	2	Dox1Day5	14.2393
2	LHL	2	Dox1Day5	19.0352
2	LHL	2	Dox1Day5	18.4443
2	LHL	2	Dox1Day5	17.3634
2	LHL	2	Dox1Day5	15.26
2	LHL	2	Dox1Day5	16.6305
2	LHL	2	Dox1Day5	13.167
2	LHL	2	Dox1Day5	15.1926
2	LHL	2	Dox1Day5	15.617
2	LHL	2	Dox1Day5	17.305
2	LHL	2	Dox1Day5	14.2486
2	LHL	2	Dox1Day5	13.1853
2	LHL	2	Dox1Day5	8.34283
2	LHL	2	Dox1Day5	11.6305
2	LHL	2	Dox1Day5	6.42043
2	LHL	2	Dox1Day5	15.1005
2	LHL	2	Dox1Day5	14.657
2	LHL	2	Dox1Day5	12.622
2	LHL	2	Dox1Day5	15.7128
2	LHL	2	Dox1Day5	19.0625
2	LHL	2	Dox1Day5	21.2634
2	LHL	2	Dox1Day5	23.768
2	LHL	2	Dox1Day5	16.3339
2	LHL	2	Dox1Day5	15.7901
2	LHL	2	Dox1Day5	14.7553
2	LHL	2	Dox1Day5	18.3526
2	LHL	2	Dox1Day5	17.7453
2	LHL	2	Dox1Day5	13.6513
2	LHL	2	Dox1Day5	10.9837
2	LHL	2	Dox1Day5	15.8036
2	LHL	2	Dox1Day5	16.7906
2	LHL	2	Dox1Day5	16.3391
2	LHL	2	Dox1Day5	17.4954
2	LHL	2	Dox1Day5	11.4798
2	LHL	2	Dox1Day5	14.1963
2	LHL	2	Dox1Day5	12.3331
2	LHL	2	Dox1Day5	12.3222
2	LHL	2	Dox1Day5	15.336
2	LHL	2	Dox1Day5	12.4153
2	LHL	2	Dox1Day5	14.0353
2	LHL	2	Dox1Day5	14.695
2	LHL	2	Dox1Day5	13.2418
2	LHL	2	Dox1Day5	20.7847
2	LHL	2	Dox1Day5	22.9833
2	LHL	2	Dox1Day5	22.4946
2	LHL	2	Dox1Day5	21.1177
2	LHL	2	Dox1Day5	21.1177
2	LHL	2	Dox1Day5	21.994
2	LHL	2	Dox1Day5	21.6632
2	LHL	2	Dox1Day5	17.526
2	LHL	2	Dox1Day5	16.9667
2	LHL	2	Dox1Day5	18.7315
2	LHL	2	Dox1Day5	14.8756
2	LHL	2	Dox1Day5	16.7875
2	LHL	2	Dox1Day5	17.5758
2	LHL	2	Dox1Day5	15.1006
2	LHL	2	Dox1Day5	18.1762
2	LHL	2	Dox1Day5	12.7207
2	LHL	2	Dox1Day5	14.7343
2	LHL	2	Dox1Day5	9.76351
2	LHL	2	Dox1Day5	10.3771
2	LHL	2	Dox1Day5	12.3368
2	LHL	2	Dox1Day5	13.1291
2	LHL	2	Dox1Day5	12.0216
2	LHL	2	Dox1Day5	12.4154
2	LHL	2	Dox1Day5	15.4797
2	LHL	2	Dox1Day5	11.8711
2	LHL	2	Dox1Day5	16.6876
2	LHL	2	Dox1Day5	16.3339
2	LHL	2	Dox1Day5	17.818
2	LHL	2	Dox1Day5	14.9287
2	LHL	2	Dox1Day5	10.9765
2	LHL	2	Dox1Day5	12.3376
2	LHL	2	Dox1Day5	11.9759
2	LHL	2	Dox1Day5	13.628
2	LHL	2	Dox1Day5	9.31562
2	LHL	2	Dox1Day5	11.1386
2	LHL	2	Dox1Day5	11.3041
2	LHL	2	Dox1Day5	9.05129
2	LHL	2	Dox1Day5	9.44573
2	LHL	2	Dox1Day5	8.13539
2	LHL	2	Dox1Day5	6.70898
2	LHL	2	Dox1Day5	4.71068
2	LHL	2	Dox1Day5	1.51034
2	LHL	2	Dox1Day5	3.64018
2	LHL	3	Dox1Day5	16.3851
2	LHL	3	Dox1Day5	13.3116
2	LHL	3	Dox1Day5	16.5981
2	LHL	3	Dox1Day5	17.3175
2	LHL	3	Dox1Day5	17.0379
2	LHL	3	Dox1Day5	19.3394
2	LHL	3	Dox1Day5	17.4544
2	LHL	3	Dox1Day5	14.8998
2	LHL	3	Dox1Day5	14.8998
2	LHL	3	Dox1Day5	16.0725
2	LHL	3	Dox1Day5	15.882
2	LHL	3	Dox1Day5	15.9734
2	LHL	3	Dox1Day5	10.616
2	LHL	3	Dox1Day5	14.2148
2	LHL	3	Dox1Day5	15.5451
2	LHL	3	Dox1Day5	15.4934
2	LHL	3	Dox1Day5	18.2523
2	LHL	3	Dox1Day5	19.5281
2	LHL	3	Dox1Day5	22.5746
2	LHL	3	Dox1Day5	21.4912
2	LHL	3	Dox1Day5	16.7387
2	LHL	3	Dox1Day5	17.0346
2	LHL	3	Dox1Day5	23.348
2	LHL	3	Dox1Day5	17.3622
2	LHL	3	Dox1Day5	21.629
2	LHL	3	Dox1Day5	19.8651
2	LHL	3	Dox1Day5	23.3603
2	LHL	3	Dox1Day5	18.5644
2	LHL	3	Dox1Day5	16.9914
2	LHL	3	Dox1Day5	19.2873
2	LHL	3	Dox1Day5	15.9605
2	LHL	3	Dox1Day5	14.0724
2	LHL	3	Dox1Day5	12.8912
2	LHL	3	Dox1Day5	13.1483
2	LHL	3	Dox1Day5	14.3875
2	LHL	3	Dox1Day5	12.0088
2	LHL	3	Dox1Day5	11.1161
2	LHL	3	Dox1Day5	12.7453
2	LHL	3	Dox1Day5	15.6657
2	LHL	3	Dox1Day5	16.5972
2	LHL	3	Dox1Day5	14.0363
2	LHL	3	Dox1Day5	12.0057
2	LHL	3	Dox1Day5	10.1152
2	LHL	3	Dox1Day5	10.0701
2	LHL	3	Dox1Day5	9.63293
2	LHL	3	Dox1Day5	10.3144
2	LHL	3	Dox1Day5	12.1681
2	LHL	3	Dox1Day5	12.5844
2	LHL	3	Dox1Day5	12.7687
2	LHL	3	Dox1Day5	14.7921
2	LHL	3	Dox1Day5	12.9169
2	LHL	3	Dox1Day5	12.1681
2	LHL	3	Dox1Day5	14.9905
2	LHL	3	Dox1Day5	10.7531
2	LHL	3	Dox1Day5	9.63665
2	LHL	3	Dox1Day5	5.79964
2	LHL	3	Dox1Day5	6.84918
2	LHL	3	Dox1Day5	3.41888
2	LHL	3	Dox1Day5	8.03512
2	LHL	3	Dox1Day5	6.54717
2	LHL	3	Dox1Day5	6.38246
2	LHL	3	Dox1Day5	7.11055
2	LHL	3	Dox1Day5	7.93287
2	LHL	3	Dox1Day5	12.0524
2	LHL	3	Dox1Day5	12.0709
2	LHL	3	Dox1Day5	9.37717
2	LHL	3	Dox1Day5	11.8201
2	LHL	3	Dox1Day5	11.7027
2	LHL	3	Dox1Day5	9.75996
2	LHL	3	Dox1Day5	11.6816
2	LHL	3	Dox1Day5	10.5685
2	LHL	3	Dox1Day5	10.8354
2	LHL	3	Dox1Day5	9.39171
2	LHL	3	Dox1Day5	11.1322
2	LHL	3	Dox1Day5	12.0715
2	LHL	3	Dox1Day5	11.8506
2	LHL	3	Dox1Day5	8.83173
2	LHL	3	Dox1Day5	9.18517
2	LHL	3	Dox1Day5	6.84917
2	LHL	3	Dox1Day5	6.93312
2	LHL	3	Dox1Day5	6.11403
2	LHL	3	Dox1Day5	7.8301
2	LHL	3	Dox1Day5	8.22483
2	LHL	3	Dox1Day5	4.07663
2	LHL	3	Dox1Day5	5.60612
2	LHL	3	Dox1Day5	10.3426
2	LHL	3	Dox1Day5	10.1535
2	LHL	3	Dox1Day5	10.2027
2	LHL	3	Dox1Day5	11.9745
2	LHL	3	Dox1Day5	11.2763
2	LHL	3	Dox1Day5	11.1008
2	LHL	3	Dox1Day5	13.3404
2	LHL	3	Dox1Day5	13.7031
2	LHL	3	Dox1Day5	14.9821
2	LHL	3	Dox1Day5	14.1879
2	LHL	3	Dox1Day5	9.81711
2	LHL	3	Dox1Day5	12.1151
2	LHL	3	Dox1Day5	11.1995
2	LHL	3	Dox1Day5	10.2643
2	LHL	3	Dox1Day5	10.1239
2	LHL	3	Dox1Day5	9.85431
2	LHL	3	Dox1Day5	6.99537
2	LHL	3	Dox1Day5	4.96883
2	LHL	3	Dox1Day5	1.98534
2	LHL	3	Dox1Day5	1.31601
2	LHL	3	Dox1Day5	3.06114
2	LHL	3	Dox1Day5	7.054
2	LHL	3	Dox1Day5	9.78979
2	LHL	3	Dox1Day5	16.9701
2	LHL	3	Dox1Day5	18.7502
2	LHL	3	Dox1Day5	20.454
2	LHL	3	Dox1Day5	17.4993
2	LHL	3	Dox1Day5	12.0565
2	LHL	3	Dox1Day5	9.00388
2	LHL	3	Dox1Day5	6.73557
2	LHL	3	Dox1Day5	9.78556
2	LHL	3	Dox1Day5	17.758
2	LHL	3	Dox1Day5	18.0826
2	LHL	3	Dox1Day5	18.9331
2	LHL	3	Dox1Day5	20.6905
2	LHL	3	Dox1Day5	22.2211
2	LHL	3	Dox1Day5	21.6745
2	LHL	3	Dox1Day5	22.3845
2	LHL	3	Dox1Day5	19.4429
2	LHL	3	Dox1Day5	18.4236
2	LHL	3	Dox1Day5	15.0601
2	LHL	3	Dox1Day5	20.7224
2	LHL	3	Dox1Day5	11.1603
2	LHL	3	Dox1Day5	3.67942
2	LHL	3	Dox1Day5	4.77693
2	LHL	3	Dox1Day5	5.22781
2	LHL	3	Dox1Day5	8.55656
2	LHL	3	Dox1Day5	11.8407
2	LHL	3	Dox1Day5	15.1073
2	LHL	3	Dox1Day5	20.4746
2	LHL	3	Dox1Day5	12.1208
2	LHL	3	Dox1Day5	9.34194
2	LHL	3	Dox1Day5	11.6796
2	LHL	3	Dox1Day5	13.7764
2	LHL	3	Dox1Day5	17.9195
2	LHL	3	Dox1Day5	16.2575
2	LHL	3	Dox1Day5	18.7203
2	LHL	3	Dox1Day5	20.704
2	LHL	3	Dox1Day5	20.0007
2	LHL	3	Dox1Day5	19.2974
2	LHL	3	Dox1Day5	17.894
2	LHL	3	Dox1Day5	20.2479
2	LHL	3	Dox1Day5	17.5485
2	LHL	3	Dox1Day5	17.6368
2	LHL	3	Dox1Day5	11.3714
2	RHL	1	Dox1Day5	1.15228
2	RHL	1	Dox1Day5	2.21275
2	RHL	1	Dox1Day5	2.14227
2	RHL	1	Dox1Day5	0.813907
2	RHL	1	Dox1Day5	1.77411
2	RHL	1	Dox1Day5	3.71117
2	RHL	1	Dox1Day5	5.16969
2	RHL	1	Dox1Day5	7.68596
2	RHL	1	Dox1Day5	10.4164
2	RHL	1	Dox1Day5	10.9379
2	RHL	1	Dox1Day5	9.76379
2	RHL	1	Dox1Day5	0.845354
2	RHL	1	Dox1Day5	2.83131
2	RHL	1	Dox1Day5	3.88591
2	RHL	1	Dox1Day5	0.661939
2	RHL	1	Dox1Day5	1.02789
2	RHL	1	Dox1Day5	3.60921
2	RHL	1	Dox1Day5	8.29792
2	RHL	1	Dox1Day5	0.676179
2	RHL	1	Dox1Day5	2.35135
2	RHL	1	Dox1Day5	1.41287
2	RHL	1	Dox1Day5	1.89712
2	RHL	1	Dox1Day5	2.73304
2	RHL	1	Dox1Day5	8.59295
2	RHL	1	Dox1Day5	5.70118
2	RHL	1	Dox1Day5	10.0886
2	RHL	1	Dox1Day5	8.45989
2	RHL	1	Dox1Day5	8.29745
2	RHL	1	Dox1Day5	6.53459
2	RHL	1	Dox1Day5	7.29136
2	RHL	1	Dox1Day5	4.11247
2	RHL	1	Dox1Day5	0.167321
2	RHL	1	Dox1Day5	0.167321
2	RHL	1	Dox1Day5	5.54329
2	RHL	1	Dox1Day5	7.27063
2	RHL	1	Dox1Day5	8.47977
2	RHL	1	Dox1Day5	6.82956
2	RHL	1	Dox1Day5	1.74185
2	RHL	1	Dox1Day5	0.117785
2	RHL	1	Dox1Day5	2.88927
2	RHL	1	Dox1Day5	2.92365
2	RHL	1	Dox1Day5	1.91766
2	RHL	1	Dox1Day5	1.83252
2	RHL	1	Dox1Day5	1.55641
2	RHL	1	Dox1Day5	0.386682
2	RHL	1	Dox1Day5	0.147651
2	RHL	1	Dox1Day5	3.51458
2	RHL	1	Dox1Day5	2.11
2	RHL	1	Dox1Day5	5.59543
2	RHL	1	Dox1Day5	1.80763
2	RHL	1	Dox1Day5	0.116798
2	RHL	1	Dox1Day5	1.2532
2	RHL	1	Dox1Day5	0.678342
2	RHL	1	Dox1Day5	0.205599
2	RHL	1	Dox1Day5	1.04447
2	RHL	1	Dox1Day5	0.167321
2	RHL	1	Dox1Day5	1.77415
2	RHL	1	Dox1Day5	1.77418
2	RHL	1	Dox1Day5	3.64679
2	RHL	1	Dox1Day5	7.42728
2	RHL	1	Dox1Day5	9.14259
2	RHL	1	Dox1Day5	10.7867
2	RHL	1	Dox1Day5	10.7868
2	RHL	1	Dox1Day5	10.9619
2	RHL	1	Dox1Day5	8.85198
2	RHL	1	Dox1Day5	3.52406
2	RHL	1	Dox1Day5	0.871367
2	RHL	1	Dox1Day5	0.167321
2	RHL	1	Dox1Day5	1.49484
2	RHL	1	Dox1Day5	0.33482
2	RHL	1	Dox1Day5	2.70781
2	RHL	1	Dox1Day5	2.07649
2	RHL	1	Dox1Day5	0.473889
2	RHL	1	Dox1Day5	0.44726
2	RHL	1	Dox1Day5	0.547221
2	RHL	1	Dox1Day5	1.44544
2	RHL	1	Dox1Day5	1.44544
2	RHL	1	Dox1Day5	1.33874
2	RHL	1	Dox1Day5	2.10882
2	RHL	1	Dox1Day5	1.22123
2	RHL	1	Dox1Day5	3.98143
2	RHL	1	Dox1Day5	2.01495
2	RHL	1	Dox1Day5	2.01495
2	RHL	1	Dox1Day5	1.51995
2	RHL	1	Dox1Day5	0.167321
2	RHL	1	Dox1Day5	0.167321
2	RHL	1	Dox1Day5	3.47165
2	RHL	1	Dox1Day5	3.34855
2	RHL	1	Dox1Day5	7.64303
2	RHL	1	Dox1Day5	7.7356
2	RHL	1	Dox1Day5	7.18146
2	RHL	1	Dox1Day5	3.47597
2	RHL	1	Dox1Day5	0.244626
2	RHL	1	Dox1Day5	0.288006
2	RHL	1	Dox1Day5	3.492
2	RHL	1	Dox1Day5	1.40036
2	RHL	1	Dox1Day5	4.19295
2	RHL	1	Dox1Day5	3.58925
2	RHL	1	Dox1Day5	4.30828
2	RHL	1	Dox1Day5	4.05245
2	RHL	1	Dox1Day5	3.68792
2	RHL	1	Dox1Day5	2.82232
2	RHL	1	Dox1Day5	2.47877
2	RHL	1	Dox1Day5	3.68489
2	RHL	1	Dox1Day5	5.39766
2	RHL	1	Dox1Day5	9.34215
2	RHL	1	Dox1Day5	8.71949
2	RHL	1	Dox1Day5	10.718
2	RHL	1	Dox1Day5	5.78486
2	RHL	1	Dox1Day5	5.87787
2	RHL	1	Dox1Day5	5.5782
2	RHL	1	Dox1Day5	2.01495
2	RHL	1	Dox1Day5	1.9518
2	RHL	1	Dox1Day5	4.63117
2	RHL	1	Dox1Day5	5.9998
2	RHL	1	Dox1Day5	9.11762
2	RHL	1	Dox1Day5	8.17979
2	RHL	1	Dox1Day5	4.26633
2	RHL	1	Dox1Day5	2.19042
2	RHL	1	Dox1Day5	1.09587
2	RHL	1	Dox1Day5	2.76909
2	RHL	1	Dox1Day5	0.265312
2	RHL	1	Dox1Day5	5.59743
2	RHL	1	Dox1Day5	3.76332
2	RHL	1	Dox1Day5	3.77677
2	RHL	1	Dox1Day5	1.82491
2	RHL	1	Dox1Day5	0.594061
2	RHL	1	Dox1Day5	1.34282
2	RHL	1	Dox1Day5	2.16572
2	RHL	1	Dox1Day5	3.17808
2	RHL	1	Dox1Day5	5.66914
2	RHL	1	Dox1Day5	5.1588
2	RHL	1	Dox1Day5	6.07351
2	RHL	1	Dox1Day5	4.66652
2	RHL	1	Dox1Day5	4.7358
2	RHL	1	Dox1Day5	5.63361
2	RHL	1	Dox1Day5	0.977865
2	RHL	1	Dox1Day5	1.53343
2	RHL	1	Dox1Day5	2.2453
2	RHL	1	Dox1Day5	7.53733
2	RHL	1	Dox1Day5	7.94272
2	RHL	1	Dox1Day5	5.80086
2	RHL	1	Dox1Day5	0.691241
2	RHL	1	Dox1Day5	2.0897
2	RHL	1	Dox1Day5	3.36064
2	RHL	1	Dox1Day5	1.59531
2	RHL	1	Dox1Day5	0.513209
2	RHL	1	Dox1Day5	5.16881
2	RHL	1	Dox1Day5	6.84035
2	RHL	1	Dox1Day5	5.30548
2	RHL	1	Dox1Day5	4.52512
2	RHL	1	Dox1Day5	2.4037
2	RHL	1	Dox1Day5	2.3758
2	RHL	1	Dox1Day5	2.14227
2	RHL	1	Dox1Day5	4.51431
2	RHL	1	Dox1Day5	5.38777
2	RHL	1	Dox1Day5	6.87917
2	RHL	1	Dox1Day5	6.1763
2	RHL	1	Dox1Day5	8.15665
2	RHL	1	Dox1Day5	6.48314
2	RHL	1	Dox1Day5	7.30574
2	RHL	1	Dox1Day5	5.54723
2	RHL	1	Dox1Day5	2.17685
2	RHL	1	Dox1Day5	1.16734
2	RHL	1	Dox1Day5	1.99116
2	RHL	1	Dox1Day5	2.10979
2	RHL	1	Dox1Day5	5.44076
2	RHL	1	Dox1Day5	1.65196
2	RHL	1	Dox1Day5	2.56655
2	RHL	1	Dox1Day5	3.98164
2	RHL	1	Dox1Day5	3.52585
2	RHL	1	Dox1Day5	5.07027
2	RHL	1	Dox1Day5	6.95486
2	RHL	1	Dox1Day5	6.20268
2	RHL	1	Dox1Day5	8.17166
2	RHL	1	Dox1Day5	7.05809
2	RHL	1	Dox1Day5	6.7746
2	RHL	1	Dox1Day5	5.25674
2	RHL	1	Dox1Day5	5.85063
2	RHL	1	Dox1Day5	5.16268
2	RHL	1	Dox1Day5	8.63099
2	RHL	1	Dox1Day5	11.1217
2	RHL	1	Dox1Day5	11.1217
2	RHL	1	Dox1Day5	11.6583
2	RHL	1	Dox1Day5	12.1049
2	RHL	1	Dox1Day5	11.3982
2	RHL	1	Dox1Day5	12.5177
2	RHL	1	Dox1Day5	11.2285
2	RHL	1	Dox1Day5	8.25861
2	RHL	1	Dox1Day5	7.86635
2	RHL	1	Dox1Day5	6.07346
2	RHL	1	Dox1Day5	4.11305
2	RHL	1	Dox1Day5	2.91529
2	RHL	1	Dox1Day5	1.84588
2	RHL	1	Dox1Day5	1.67434
2	RHL	1	Dox1Day5	0.0836257
2	RHL	2	Dox1Day5	4.99176
2	RHL	2	Dox1Day5	4.3175
2	RHL	2	Dox1Day5	5.44123
2	RHL	2	Dox1Day5	4.80931
2	RHL	2	Dox1Day5	4.3363
2	RHL	2	Dox1Day5	2.02969
2	RHL	2	Dox1Day5	6.74393
2	RHL	2	Dox1Day5	6.54254
2	RHL	2	Dox1Day5	10.1376
2	RHL	2	Dox1Day5	10.4524
2	RHL	2	Dox1Day5	3.84464
2	RHL	2	Dox1Day5	0.603522
2	RHL	2	Dox1Day5	0.821416
2	RHL	2	Dox1Day5	1.13569
2	RHL	2	Dox1Day5	0.024061
2	RHL	2	Dox1Day5	0.876627
2	RHL	2	Dox1Day5	1.40877
2	RHL	2	Dox1Day5	0.986257
2	RHL	2	Dox1Day5	1.10547
2	RHL	2	Dox1Day5	3.65739
2	RHL	2	Dox1Day5	1.62254
2	RHL	2	Dox1Day5	1.4148
2	RHL	2	Dox1Day5	0.449647
2	RHL	2	Dox1Day5	3.61061
2	RHL	2	Dox1Day5	2.79195
2	RHL	2	Dox1Day5	4.31744
2	RHL	2	Dox1Day5	5.09014
2	RHL	2	Dox1Day5	3.4851
2	RHL	2	Dox1Day5	1.90304
2	RHL	2	Dox1Day5	2.1025
2	RHL	2	Dox1Day5	3.24927
2	RHL	2	Dox1Day5	6.54249
2	RHL	2	Dox1Day5	6.84917
2	RHL	2	Dox1Day5	6.14935
2	RHL	2	Dox1Day5	1.09662
2	RHL	2	Dox1Day5	1.95724
2	RHL	2	Dox1Day5	3.28999
2	RHL	2	Dox1Day5	0.693415
2	RHL	2	Dox1Day5	0.950341
2	RHL	2	Dox1Day5	4.158
2	RHL	2	Dox1Day5	5.87554
2	RHL	2	Dox1Day5	3.88978
2	RHL	2	Dox1Day5	3.98305
2	RHL	2	Dox1Day5	0.107116
2	RHL	2	Dox1Day5	0.167321
2	RHL	2	Dox1Day5	2.1641
2	RHL	2	Dox1Day5	3.31894
2	RHL	2	Dox1Day5	5.48861
2	RHL	2	Dox1Day5	5.14078
2	RHL	2	Dox1Day5	7.44533
2	RHL	2	Dox1Day5	5.55758
2	RHL	2	Dox1Day5	4.43869
2	RHL	2	Dox1Day5	3.53381
2	RHL	2	Dox1Day5	0.167321
2	RHL	2	Dox1Day5	3.05723
2	RHL	2	Dox1Day5	6.44617
2	RHL	2	Dox1Day5	9.69848
2	RHL	2	Dox1Day5	6.35245
2	RHL	2	Dox1Day5	6.35245
2	RHL	2	Dox1Day5	1.20224
2	RHL	2	Dox1Day5	1.29386
2	RHL	2	Dox1Day5	0.548249
2	RHL	2	Dox1Day5	0.503498
2	RHL	2	Dox1Day5	2.47648
2	RHL	2	Dox1Day5	3.86504
2	RHL	2	Dox1Day5	3.5537
2	RHL	2	Dox1Day5	3.38382
2	RHL	2	Dox1Day5	1.08714
2	RHL	2	Dox1Day5	1.51732
2	RHL	2	Dox1Day5	1.34709
2	RHL	2	Dox1Day5	2.1238
2	RHL	2	Dox1Day5	2.06593
2	RHL	2	Dox1Day5	3.50732
2	RHL	2	Dox1Day5	4.46749
2	RHL	2	Dox1Day5	1.90304
2	RHL	2	Dox1Day5	5.20975
2	RHL	2	Dox1Day5	3.53375
2	RHL	2	Dox1Day5	3.43778
2	RHL	2	Dox1Day5	0.167321
2	RHL	2	Dox1Day5	3.15043
2	RHL	2	Dox1Day5	4.73175
2	RHL	2	Dox1Day5	10.86
2	RHL	2	Dox1Day5	7.70629
2	RHL	2	Dox1Day5	7.93098
2	RHL	2	Dox1Day5	3.10313
2	RHL	2	Dox1Day5	2.14406
2	RHL	2	Dox1Day5	1.64486
2	RHL	2	Dox1Day5	0.560201
2	RHL	2	Dox1Day5	1.94602
2	RHL	2	Dox1Day5	2.95114
2	RHL	2	Dox1Day5	4.61558
2	RHL	2	Dox1Day5	4.66195
2	RHL	2	Dox1Day5	3.58385
2	RHL	2	Dox1Day5	1.59802
2	RHL	2	Dox1Day5	3.63549
2	RHL	2	Dox1Day5	6.78075
2	RHL	2	Dox1Day5	5.3617
2	RHL	2	Dox1Day5	4.13285
2	RHL	2	Dox1Day5	5.11398
2	RHL	2	Dox1Day5	7.52376
2	RHL	2	Dox1Day5	7.53712
2	RHL	2	Dox1Day5	8.20737
2	RHL	2	Dox1Day5	5.04712
2	RHL	2	Dox1Day5	3.68874
2	RHL	2	Dox1Day5	1.90304
2	RHL	2	Dox1Day5	1.49298
2	RHL	2	Dox1Day5	2.73263
2	RHL	2	Dox1Day5	3.15046
2	RHL	2	Dox1Day5	1.77
2	RHL	2	Dox1Day5	0.92531
2	RHL	2	Dox1Day5	5.93421
2	RHL	2	Dox1Day5	4.24209
2	RHL	2	Dox1Day5	3.4853
2	RHL	2	Dox1Day5	5.80915
2	RHL	2	Dox1Day5	7.93133
2	RHL	2	Dox1Day5	9.1175
2	RHL	2	Dox1Day5	7.86414
2	RHL	2	Dox1Day5	5.74642
2	RHL	2	Dox1Day5	5.01622
2	RHL	2	Dox1Day5	3.49688
2	RHL	2	Dox1Day5	4.8271
2	RHL	2	Dox1Day5	7.93178
2	RHL	2	Dox1Day5	8.80045
2	RHL	2	Dox1Day5	9.32965
2	RHL	2	Dox1Day5	11.1214
2	RHL	2	Dox1Day5	10.1053
2	RHL	2	Dox1Day5	9.13092
2	RHL	2	Dox1Day5	5.3707
2	RHL	2	Dox1Day5	3.91902
2	RHL	2	Dox1Day5	0.650978
2	RHL	2	Dox1Day5	0.795329
2	RHL	2	Dox1Day5	2.19191
2	RHL	2	Dox1Day5	3.94483
2	RHL	2	Dox1Day5	3.1989
2	RHL	2	Dox1Day5	2.54773
2	RHL	2	Dox1Day5	5.80562
2	RHL	2	Dox1Day5	4.3797
2	RHL	2	Dox1Day5	4.95827
2	RHL	2	Dox1Day5	5.1899
2	RHL	2	Dox1Day5	6.82491
2	RHL	2	Dox1Day5	6.38594
2	RHL	2	Dox1Day5	6.09614
2	RHL	2	Dox1Day5	4.73067
2	RHL	2	Dox1Day5	4.12192
2	RHL	2	Dox1Day5	3.85867
2	RHL	2	Dox1Day5	6.4394
2	RHL	2	Dox1Day5	7.97328
2	RHL	2	Dox1Day5	11.589
2	RHL	2	Dox1Day5	8.95553
2	RHL	2	Dox1Day5	9.32963
2	RHL	2	Dox1Day5	9.62962
2	RHL	2	Dox1Day5	8.58255
2	RHL	2	Dox1Day5	7.51968
2	RHL	2	Dox1Day5	3.91905
2	RHL	2	Dox1Day5	0.167321
2	RHL	2	Dox1Day5	1.6226
2	RHL	2	Dox1Day5	5.45031
2	RHL	2	Dox1Day5	1.65099
2	RHL	2	Dox1Day5	0.167321
2	RHL	2	Dox1Day5	3.80374
2	RHL	2	Dox1Day5	8.28762
2	RHL	2	Dox1Day5	10.3342
2	RHL	2	Dox1Day5	6.68271
2	RHL	2	Dox1Day5	7.43519
2	RHL	2	Dox1Day5	9.63677
2	RHL	2	Dox1Day5	10.32
2	RHL	2	Dox1Day5	10.467
2	RHL	2	Dox1Day5	9.3979
2	RHL	2	Dox1Day5	7.98783
2	RHL	2	Dox1Day5	8.01317
2	RHL	2	Dox1Day5	8.59954
2	RHL	2	Dox1Day5	9.78704
2	RHL	2	Dox1Day5	9.94976
2	RHL	2	Dox1Day5	10.292
2	RHL	2	Dox1Day5	12.4754
2	RHL	2	Dox1Day5	13.9668
2	RHL	2	Dox1Day5	13.9668
2	RHL	3	Dox1Day5	3.61465
2	RHL	3	Dox1Day5	3.91908
2	RHL	3	Dox1Day5	6.07341
2	RHL	3	Dox1Day5	5.87793
2	RHL	3	Dox1Day5	6.15987
2	RHL	3	Dox1Day5	4.94407
2	RHL	3	Dox1Day5	5.43739
2	RHL	3	Dox1Day5	3.50177
2	RHL	3	Dox1Day5	0.0111519
2	RHL	3	Dox1Day5	4.94995
2	RHL	3	Dox1Day5	5.62071
2	RHL	3	Dox1Day5	8.07898
2	RHL	3	Dox1Day5	7.48762
2	RHL	3	Dox1Day5	8.07898
2	RHL	3	Dox1Day5	4.58678
2	RHL	3	Dox1Day5	2.89977
2	RHL	3	Dox1Day5	3.18137
2	RHL	3	Dox1Day5	0.53544
2	RHL	3	Dox1Day5	2.21053
2	RHL	3	Dox1Day5	4.24035
2	RHL	3	Dox1Day5	6.83961
2	RHL	3	Dox1Day5	5.54916
2	RHL	3	Dox1Day5	2.612
2	RHL	3	Dox1Day5	3.82181
2	RHL	3	Dox1Day5	1.87706
2	RHL	3	Dox1Day5	3.74622
2	RHL	3	Dox1Day5	5.44593
2	RHL	3	Dox1Day5	7.05334
2	RHL	3	Dox1Day5	5.7533
2	RHL	3	Dox1Day5	4.71147
2	RHL	3	Dox1Day5	4.85373
2	RHL	3	Dox1Day5	5.02842
2	RHL	3	Dox1Day5	3.95054
2	RHL	3	Dox1Day5	1.3317
2	RHL	3	Dox1Day5	0.167321
2	RHL	3	Dox1Day5	3.15049
2	RHL	3	Dox1Day5	4.66772
2	RHL	3	Dox1Day5	3.76859
2	RHL	3	Dox1Day5	1.16257
2	RHL	3	Dox1Day5	3.24672
2	RHL	3	Dox1Day5	3.51668
2	RHL	3	Dox1Day5	2.13528
2	RHL	3	Dox1Day5	0.130324
2	RHL	3	Dox1Day5	1.06349
2	RHL	3	Dox1Day5	9.4034
2	RHL	3	Dox1Day5	7.19427
2	RHL	3	Dox1Day5	3.36581
2	RHL	3	Dox1Day5	4.72871
2	RHL	3	Dox1Day5	3.66637
2	RHL	3	Dox1Day5	3.30453
2	RHL	3	Dox1Day5	5.3617
2	RHL	3	Dox1Day5	8.90561
2	RHL	3	Dox1Day5	8.57515
2	RHL	3	Dox1Day5	8.06622
2	RHL	3	Dox1Day5	8.24965
2	RHL	3	Dox1Day5	8.11535
2	RHL	3	Dox1Day5	6.26789
2	RHL	3	Dox1Day5	5.79482
2	RHL	3	Dox1Day5	3.43775
2	RHL	3	Dox1Day5	1.34401
2	RHL	3	Dox1Day5	3.05714
2	RHL	3	Dox1Day5	4.59628
2	RHL	3	Dox1Day5	4.96285
2	RHL	3	Dox1Day5	4.80582
2	RHL	3	Dox1Day5	0.011231
2	RHL	3	Dox1Day5	3.73708
2	RHL	3	Dox1Day5	2.01085
2	RHL	3	Dox1Day5	1.25968
2	RHL	3	Dox1Day5	4.59762
2	RHL	3	Dox1Day5	5.01852
2	RHL	3	Dox1Day5	1.24414
2	RHL	3	Dox1Day5	2.38598
2	RHL	3	Dox1Day5	1.68043
2	RHL	3	Dox1Day5	0.403344
2	RHL	3	Dox1Day5	0.167321
2	RHL	3	Dox1Day5	0.348937
2	RHL	3	Dox1Day5	2.0285
2	RHL	3	Dox1Day5	4.91359
2	RHL	3	Dox1Day5	1.08087
2	RHL	3	Dox1Day5	4.00637
2	RHL	3	Dox1Day5	4.00638
2	RHL	3	Dox1Day5	5.59361
2	RHL	3	Dox1Day5	3.91434
2	RHL	3	Dox1Day5	3.27491
2	RHL	3	Dox1Day5	1.75847
2	RHL	3	Dox1Day5	1.98111
2	RHL	3	Dox1Day5	4.66314
2	RHL	3	Dox1Day5	5.17877
2	RHL	3	Dox1Day5	3.46114
2	RHL	3	Dox1Day5	0.251634
2	RHL	3	Dox1Day5	3.24977
2	RHL	3	Dox1Day5	8.99077
2	RHL	3	Dox1Day5	5.15367
2	RHL	3	Dox1Day5	5.03148
2	RHL	3	Dox1Day5	7.69447
2	RHL	3	Dox1Day5	11.5374
2	RHL	3	Dox1Day5	10.9605
2	RHL	3	Dox1Day5	10.3217
2	RHL	3	Dox1Day5	7.96492
2	RHL	3	Dox1Day5	4.05441
2	RHL	3	Dox1Day5	3.59793
2	RHL	3	Dox1Day5	8.53318
2	RHL	3	Dox1Day5	10.6263
2	RHL	3	Dox1Day5	10.787
2	RHL	3	Dox1Day5	8.45953
2	RHL	3	Dox1Day5	12.0677
2	RHL	3	Dox1Day5	11.2909
2	RHL	3	Dox1Day5	10.5307
2	RHL	3	Dox1Day5	9.41095
2	RHL	3	Dox1Day5	7.07854
2	RHL	3	Dox1Day5	3.58394
2	RHL	3	Dox1Day5	1.85202
2	RHL	3	Dox1Day5	0.167321
2	RHL	3	Dox1Day5	3.19911
2	RHL	3	Dox1Day5	2.2795
2	RHL	3	Dox1Day5	6.87715
2	RHL	3	Dox1Day5	8.68503
2	RHL	3	Dox1Day5	6.34891
2	RHL	3	Dox1Day5	6.47504
2	RHL	3	Dox1Day5	7.80361
2	RHL	3	Dox1Day5	8.65496
2	RHL	3	Dox1Day5	8.38572
2	RHL	3	Dox1Day5	7.98448
2	RHL	3	Dox1Day5	5.94261
2	RHL	3	Dox1Day5	5.97214
2	RHL	3	Dox1Day5	5.05628
2	RHL	3	Dox1Day5	5.44126
2	RHL	3	Dox1Day5	7.86448
2	RHL	3	Dox1Day5	11.1382
2	RHL	3	Dox1Day5	11.7108
2	RHL	3	Dox1Day5	11.1183
2	RHL	3	Dox1Day5	13.3361
2	RHL	3	Dox1Day5	13.0933
2	RHL	3	Dox1Day5	12.139
2	RHL	3	Dox1Day5	10.787
2	RHL	3	Dox1Day5	7.7648
2	RHL	3	Dox1Day5	3.80027
2	RHL	3	Dox1Day5	1.98564
2	RHL	3	Dox1Day5	1.90304
2	RHL	3	Dox1Day5	1.5684
2	RHL	3	Dox1Day5	1.54251
2	RHL	3	Dox1Day5	2.33936
2	RHL	3	Dox1Day5	7.18385
2	RHL	3	Dox1Day5	8.54128
2	RHL	3	Dox1Day5	5.79636
2	RHL	3	Dox1Day5	6.83196
2	RHL	3	Dox1Day5	8.78722
2	RHL	3	Dox1Day5	11.6402
2	RHL	3	Dox1Day5	8.43852
2	RHL	3	Dox1Day5	10.0029
2	RHL	3	Dox1Day5	10.5826
2	RHL	3	Dox1Day5	6.70227
2	RHL	3	Dox1Day5	6.17446
2	RHL	3	Dox1Day5	5.52315
2	RHL	3	Dox1Day5	8.1385
2	RHL	3	Dox1Day5	10.6272
2	RHL	3	Dox1Day5	10.9027
7	LHL	1	Dox1Day5	19.5926
7	LHL	1	Dox1Day5	18.456
7	LHL	1	Dox1Day5	14.5487
7	LHL	1	Dox1Day5	20.242
7	LHL	1	Dox1Day5	19.3324
7	LHL	1	Dox1Day5	18.7508
7	LHL	1	Dox1Day5	18.6235
7	LHL	1	Dox1Day5	20.33
7	LHL	1	Dox1Day5	18.4704
7	LHL	1	Dox1Day5	15.9884
7	LHL	1	Dox1Day5	17.5681
7	LHL	1	Dox1Day5	15.3796
7	LHL	1	Dox1Day5	12.9479
7	LHL	1	Dox1Day5	14.6192
7	LHL	1	Dox1Day5	16.1963
7	LHL	1	Dox1Day5	14.2912
7	LHL	1	Dox1Day5	11.5368
7	LHL	1	Dox1Day5	14.6523
7	LHL	1	Dox1Day5	13.587
7	LHL	1	Dox1Day5	15.2484
7	LHL	1	Dox1Day5	13.587
7	LHL	1	Dox1Day5	11.8546
7	LHL	1	Dox1Day5	8.88248
7	LHL	1	Dox1Day5	8.98715
7	LHL	1	Dox1Day5	10.7946
7	LHL	1	Dox1Day5	12.6631
7	LHL	1	Dox1Day5	12.313
7	LHL	1	Dox1Day5	11.1777
7	LHL	1	Dox1Day5	12.2961
7	LHL	1	Dox1Day5	9.7268
7	LHL	1	Dox1Day5	12.124
7	LHL	1	Dox1Day5	13.0589
7	LHL	1	Dox1Day5	14.4034
7	LHL	1	Dox1Day5	12.9549
7	LHL	1	Dox1Day5	15.5378
7	LHL	1	Dox1Day5	15.0718
7	LHL	1	Dox1Day5	12.8706
7	LHL	1	Dox1Day5	12.1122
7	LHL	1	Dox1Day5	12.1566
7	LHL	1	Dox1Day5	10.4372
7	LHL	1	Dox1Day5	7.92855
7	LHL	1	Dox1Day5	6.91391
7	LHL	1	Dox1Day5	7.8816
7	LHL	1	Dox1Day5	8.43081
7	LHL	1	Dox1Day5	11.2841
7	LHL	1	Dox1Day5	12.0655
7	LHL	1	Dox1Day5	11.2488
7	LHL	1	Dox1Day5	9.64597
7	LHL	1	Dox1Day5	10.4947
7	LHL	1	Dox1Day5	9.02746
7	LHL	1	Dox1Day5	9.82131
7	LHL	1	Dox1Day5	9.98612
7	LHL	1	Dox1Day5	9.70838
7	LHL	1	Dox1Day5	11.948
7	LHL	1	Dox1Day5	10.3874
7	LHL	1	Dox1Day5	10.2086
7	LHL	1	Dox1Day5	8.65636
7	LHL	1	Dox1Day5	8.82189
7	LHL	1	Dox1Day5	10.3116
7	LHL	1	Dox1Day5	15.0732
7	LHL	1	Dox1Day5	14.8851
7	LHL	1	Dox1Day5	16.0558
7	LHL	1	Dox1Day5	17.2579
7	LHL	1	Dox1Day5	15.7172
7	LHL	1	Dox1Day5	15.0922
7	LHL	1	Dox1Day5	12.8721
7	LHL	1	Dox1Day5	11.155
7	LHL	1	Dox1Day5	13.0908
7	LHL	1	Dox1Day5	12.4312
7	LHL	1	Dox1Day5	10.5477
7	LHL	1	Dox1Day5	10.2146
7	LHL	1	Dox1Day5	11.1526
7	LHL	1	Dox1Day5	14.5808
7	LHL	1	Dox1Day5	14.7289
7	LHL	1	Dox1Day5	17.6237
7	LHL	1	Dox1Day5	15.8464
7	LHL	1	Dox1Day5	15.3683
7	LHL	1	Dox1Day5	13.9422
7	LHL	1	Dox1Day5	17.2496
7	LHL	1	Dox1Day5	15.4878
7	LHL	1	Dox1Day5	16.136
7	LHL	1	Dox1Day5	16.5804
7	LHL	1	Dox1Day5	15.1453
7	LHL	1	Dox1Day5	13.9323
7	LHL	1	Dox1Day5	14.0697
7	LHL	1	Dox1Day5	14.4148
7	LHL	1	Dox1Day5	15.4973
7	LHL	1	Dox1Day5	15.4097
7	LHL	1	Dox1Day5	18.2505
7	LHL	1	Dox1Day5	18.0249
7	LHL	1	Dox1Day5	17.71
7	LHL	1	Dox1Day5	18.0988
7	LHL	1	Dox1Day5	17.7943
7	LHL	1	Dox1Day5	16.5906
7	LHL	1	Dox1Day5	14.9269
7	LHL	1	Dox1Day5	11.3915
7	LHL	1	Dox1Day5	10.7066
7	LHL	1	Dox1Day5	9.90787
7	LHL	1	Dox1Day5	10.8663
7	LHL	1	Dox1Day5	11.0547
7	LHL	1	Dox1Day5	10.3518
7	LHL	1	Dox1Day5	10.386
7	LHL	1	Dox1Day5	13.2739
7	LHL	1	Dox1Day5	13.7649
[truncated: 8,521 more rows]

## Sheet: Con v Dox
animal_ID	Avg_preDox1	Avg_Dox1OnD5
1	8.80005	8.49596
2	8.34633	10.3687
7	10.7034	16.2678
8	15.6381	9.76217
9	13.5337	13.3838
10	6.84229	13.1873
12	6.6206	9.90279
13	8.3525	5.21469
14	11.3097	5.77109
15	6.77544	3.26027
16	12.7599	7.04722
17	10.8466	7.51697
18	12.46	13.24
