# Supplementary material for: Long ascending propriospinal neurons provide flexible, context-specific control of interlimb coordination
Source: eLife. 2020 Sep 9;9:e53565. doi: 10.7554/eLife.53565 (PMC7527236; doi:10.7554/eLife.53565)
Supplement: Figure 3—source data 2. [file elife-53565-fig3-data2.xlsx]

## Sheet: RawData
Animal_ID	Time_ID	HAT_Peak	HAT_Trough	HAT_excursion	IHA_Peak	IHA_Trough	IHA_Excursion
1	Baseline	171.645	87.2055	84.4399	149.466	89.786	59.6802
1	Baseline	172.534	94.0003	78.5341	152.322	90.9568	61.3651
1	Baseline	169.99	108.782	61.2073	150.962	93.2232	57.7384
1	Baseline	155.454	96.1067	59.3473	150.094	91.9439	58.1505
1	Baseline	166.682	88.0627	78.6189	143.421	93.9939	49.4271
1	Baseline	169.47	98.8198	70.6499	152.69	93.6186	59.0718
1	Baseline	171.207	98.0474	73.1593	148.358	93.0273	55.3304
1	Baseline	171.464	100.411	71.0529	140.793	92.5094	48.284
1	Baseline	166.736	99.1714	67.5642	149.063	89.9982	59.0649
1	Baseline	172.661	107.571	65.0906	145.271	89.718	55.553
1	Baseline	167.842	109.173	58.6689	137.671	90.026	47.6446
1	Baseline	166.123	107.912	58.2111	141.348	94.2845	47.063
2	Baseline	145.962	94.591	51.3713	143.141	90.6036	52.5378
2	Baseline	154.96	96.7796	58.1807	144.604	91.517	53.0874
2	Baseline	155.988	98.7382	57.2498	131.566	90.3909	41.1753
2	Baseline	167.657	78.8405	88.8161	149.612	87.6663	61.9457
2	Baseline	160.458	85.7624	74.6961	147.167	86.2628	60.9045
2	Baseline	154.153	92.7616	61.3915	139.602	89.1223	50.4793
2	Baseline	151.545	104.496	47.0491	141.393	90.1778	51.2153
7	Baseline	161.362	100.322	61.0403	152.577	91.9462	60.6313
7	Baseline	167.537	93.9407	73.5965	146.187	92.5158	53.6713
7	Baseline	171.062	95.2258	75.8357	146.258	92.9677	53.2903
7	Baseline	168.581	101.564	67.0167	138.473	89.0771	49.3959
7	Baseline	166.67	95.9535	70.717	143.712	98.5455	45.166
7	Baseline	165.302	112.736	52.5655	144.264	92.6719	51.5921
7	Baseline	173.481	107.455	66.0265	147.555	92.087	55.4684
7	Baseline	168.796	102.49	66.3054	150.736	94.4255	56.3101
8	Baseline	173.114	102.11	71.0032	144.541	73.2488	71.2919
8	Baseline	170.814	90.5546	80.259	142.201	81.8348	60.3659
8	Baseline	160.973	108.596	52.377	151.532	81.5883	69.9435
8	Baseline	171.769	104.072	67.6978	150.083	86.0378	64.0457
8	Baseline	168.631	104.603	64.0282	143.701	87.789	55.9118
8	Baseline	169.088	99.6599	69.4278	132.288	78.9306	53.3573
8	Baseline	167.36	108.043	59.3171	146.609	84.0459	62.5632
8	Baseline	158.989	91.0319	67.9574	135.553	86.3293	49.2241
8	Baseline	160.107	106.599	53.5083	132.734	83.5532	49.1807
8	Baseline	163.983	88.2441	75.7385	137.853	92.1437	45.7096
9	Baseline	162.653	86.989	75.6636	162.556	97.7259	64.8299
9	Baseline	160.498	90.47	70.0281	159.89	96.7498	63.14
9	Baseline	138.883	90.3029	48.5801	156.613	95.0061	61.6071
9	Baseline	137.16	101.471	35.6891	157.102	95.2878	61.8146
9	Baseline	159.746	97.0828	62.6635	164.522	102.424	62.0977
9	Baseline	160.869	98.2011	62.668	153.967	101.495	52.4721
9	Baseline	138.685	102.9	35.7849	154.13	100.183	53.9474
9	Baseline	148.976	108.204	40.7728	155.224	92.477	62.7469
9	Baseline	138.593	95.7159	42.8774	141.938	98.7141	43.2243
9	Baseline	140.076	102.004	38.0714	151.102	103.079	48.0235
10	Baseline	158.107	113.009	45.0978	138.183	88.3099	49.8729
10	Baseline	153.919	103.979	49.94	141.855	90.5592	51.2962
10	Baseline	164.824	104.473	60.351	137.79	86.7468	51.0429
10	Baseline	167.804	99.8107	67.9937	145.193	89.8608	55.3326
10	Baseline	164.645	106.264	58.3805	148.714	90.427	58.2869
10	Baseline	162.375	105.596	56.7791	138.259	89.7685	48.4901
10	Baseline	154.189	105.056	49.1326	142.91	90.4205	52.4897
10	Baseline	163.245	91.3806	71.8639	143.344	90.1744	53.17
10	Baseline	164.416	102.113	62.3033	143.233	89.3816	53.8512
10	Baseline	162.223	93.9786	68.2439	138.476	84.4536	54.022
10	Baseline	158.621	101.672	56.9484	138.021	92.1599	45.861
12	Baseline	158.983	110.775	48.2079	146.878	90.1424	56.7353
12	Baseline	161.06	106.25	54.8095	144.39	90.4972	53.8931
12	Baseline	165.774	98.4076	67.3661	143.622	90.6073	53.0146
12	Baseline	151.948	104.296	47.6525	147.038	94.579	52.4588
12	Baseline	159.795	109.378	50.4167	143.216	90.5182	52.6974
12	Baseline	163.61	93.4485	70.1611	140.512	93.2577	47.2544
12	Baseline	159.766	100.715	59.0507	140.776	91.4413	49.3351
13	Baseline	155.117	104.597	50.5202	168.427	98.907	69.5201
13	Baseline	151.436	95.5474	55.8886	169.776	99.7898	69.9864
13	Baseline	161.026	93.1369	67.8886	166.058	99.5163	66.542
13	Baseline	163.153	82.4557	80.6978	168.742	103.587	65.1548
13	Baseline	164.085	86.4344	77.6505	160.549	100.188	60.3605
13	Baseline	159.455	88.2738	71.1809	161.193	97.6707	63.5227
13	Baseline	163.912	93.0072	70.9048	160.484	94.3499	66.1341
13	Baseline	160.669	97.1375	63.5311	165.399	99.971	65.4278
13	Baseline	162.94	88.7944	74.1455	164.185	99.6285	64.5565
13	Baseline	156.557	93.2246	63.332	161.149	98.3429	62.8059
13	Baseline	153.317	89.4662	63.8512	164.586	97.4696	67.1161
13	Baseline	165.663	93.8406	71.8228	165.655	101.874	63.7805
14	Baseline	152.322	94.8132	57.5084	151.783	94.1961	57.5864
14	Baseline	152.986	96.8242	56.1621	156.941	91.4625	65.4783
14	Baseline	160.675	93.9175	66.7577	155.487	88.8138	66.6734
14	Baseline	157.054	90.1364	66.9178	157.762	96.7787	60.9831
14	Baseline	166.841	107.243	59.5977	160.636	95.2531	65.3831
14	Baseline	150.281	99.2757	51.0057	159.946	99.9241	60.0216
15	Baseline	159.555	80.1618	79.3932	163.244	94.347	68.8974
15	Baseline	157.543	98.2068	59.3362	163.031	92.1743	70.8565
15	Baseline	136.846	92.5761	44.2694	160.264	90.4542	69.8099
15	Baseline	165.071	98.7827	66.2879	156.977	96.2748	60.7024
15	Baseline	170.177	97.6481	72.5292	153.99	91.7724	62.218
15	Baseline	159.076	107.029	52.0469	145.008	89.3929	55.6149
15	Baseline	153.291	103.357	49.9335	157.616	92.4235	65.1924
15	Baseline	165	99.7166	65.2838	153.142	90.0386	63.1032
15	Baseline	160.103	90.8755	69.2273	153.195	90.7762	62.4189
15	Baseline	169.288	103.92	65.3679	144.312	89.6944	54.618
15	Baseline	160.701	93.9309	66.7705	149.65	87.6906	61.9593
15	Baseline	150.844	96.0955	54.7488	143.437	91.7471	51.6903
16	Baseline	173.897	104.673	69.2242	153.868	88.6393	65.2283
16	Baseline	166.588	101.298	65.2892	154.833	91.4255	63.4071
16	Baseline	164.367	97.6964	66.6701	151.223	89.1407	62.0825
16	Baseline	155.947	96.4589	59.4882	154.124	92.7017	61.4224
16	Baseline	170.969	109.022	61.9469	152.58	89.8311	62.749
16	Baseline	167.85	92.4558	75.3947	148.792	91.0345	57.7574
17	Baseline	146.568	89.5388	57.0288	157.919	89.0021	68.9173
17	Baseline	160.154	96.994	63.1601	152.639	86.1812	66.458
17	Baseline	169.993	94.2759	75.7175	147.924	85.9397	61.984
17	Baseline	173.211	99.3896	73.8216	149.658	90.2225	59.4359
17	Baseline	161.625	102.522	59.1025	149.98	86.5076	63.4724
18	Baseline	151.371	105.063	46.3087	162.04	100.38	61.6601
18	Baseline	153.863	96.1781	57.6846	160.528	99.1917	61.3364
18	Baseline	161.654	97.9492	63.7051	160.326	95.8622	64.464
18	Baseline	175.099	85.641	89.4577	160.127	94.0974	66.0293
18	Baseline	167.233	116.014	51.2184	158.596	102.911	55.685
18	Baseline	160.29	111.378	48.9119	151.87	108.474	43.3955
18	Baseline	169.079	97.4067	71.6722	154.843	109.942	44.9009
1	PreDox1	164.836	103.231	61.6055	153.67	84.3181	69.3516
1	PreDox1	163.898	104.391	59.5075	152.413	84.5274	67.8854
1	PreDox1	150.82	101.89	48.9305	148.052	88.4581	59.5935
1	PreDox1	152.858	96.0315	56.8262	151.635	86.1024	65.5322
1	PreDox1	153.852	99.9533	53.899	150.833	86.2902	64.5427
1	PreDox1	154.025	97.0148	57.01	151.971	88.261	63.7099
2	PreDox1	166.493	114.392	52.1008	120.482	75.377	45.1054
2	PreDox1	174.861	109.152	65.709	125.546	74.7865	50.7593
2	PreDox1	174.263	105.338	68.9247	120.774	74.1263	46.6477
2	PreDox1	170.316	111.519	58.7963	117.565	73.2251	44.34
2	PreDox1	159.886	111.299	48.5871	124.525	72.7272	51.7982
2	PreDox1	164.726	110.668	54.058	119.731	74.7981	44.9325
7	PreDox1	145.661	102.561	43.0998	162.521	92.1784	70.3429
7	PreDox1	151.742	102.731	49.0106	161.356	84.9717	76.3843
7	PreDox1	149.764	101.18	48.5841	154.823	86.2662	68.5567
7	PreDox1	152.81	108.816	43.9936	157.079	85.9701	71.1087
7	PreDox1	159.705	100.935	58.7699	155.593	88.9416	66.6515
7	PreDox1	162.453	98.604	63.8494	153.918	86.825	67.0935
7	PreDox1	165.823	98.2541	67.5685	151.252	93.4226	57.8298
8	PreDox1	166.689	109.575	57.1142	154.963	87.8428	67.1199
8	PreDox1	158.699	109.913	48.7857	156.7	88.0496	68.6509
8	PreDox1	148.822	112.048	36.7746	154.478	88.5196	65.9586
8	PreDox1	169.449	110.345	59.1042	148.661	89.4085	59.2525
8	PreDox1	161.569	109.854	51.7145	152.106	88.9096	63.1965
8	PreDox1	160.712	107.295	53.4173	145.514	92.3802	53.134
9	PreDox1	166.497	109.002	57.4948	148.046	89.8496	58.1963
9	PreDox1	161.383	106.412	54.9711	148.43	87.6199	60.8103
9	PreDox1	163.539	104.785	58.7546	147.782	88.0046	59.7776
9	PreDox1	164.452	105.752	58.7002	146.368	94.0751	52.2927
9	PreDox1	166.186	105.135	61.0511	147.393	90.4034	56.9899
9	PreDox1	168.244	105.117	63.1272	144.835	90.4336	54.4013
9	PreDox1	155.771	103.188	52.5831	144.225	93.5786	50.6462
10	PreDox1	147.398	93.2669	54.1308	160.658	93.5985	67.0598
10	PreDox1	164.538	99.3879	65.15	155.083	92.3182	62.7646
10	PreDox1	157.722	98.2497	59.472	160.465	94.2245	66.2407
10	PreDox1	154.964	103.494	51.4702	157.05	94.0547	62.995
10	PreDox1	154.547	97.715	56.8324	152.867	92.7056	60.1611
10	PreDox1	153.079	97.324	55.7547	157.305	92.4522	64.8528
12	PreDox1	156.916	117.128	39.7874	153.875	92.0969	61.7779
12	PreDox1	154.986	106.538	48.448	151.202	89.8411	61.3605
12	PreDox1	159.847	104.176	55.6707	151.861	87.4043	64.4564
12	PreDox1	157.806	103.046	54.7594	147.122	91.6452	55.4765
12	PreDox1	154.636	104.962	49.6733	140.457	95.8325	44.6246
13	PreDox1	156.963	86.9881	69.9748	161.406	94.7507	66.6555
13	PreDox1	152.241	89.107	63.1335	164.354	94.6673	69.6868
13	PreDox1	153.861	93.7688	60.0927	164.577	99.8085	64.7683
13	PreDox1	164.423	101.926	62.4969	159.682	115.762	43.9198
13	PreDox1	144.112	91.4433	52.6686	152.099	98.0063	54.0924
13	PreDox1	137.412	96.3655	41.0464	166.792	97.6438	69.1477
13	PreDox1	144.918	96.521	48.3966	163.941	102.074	61.8665
14	PreDox1	157.504	94.9941	62.5096	156.846	90.5125	66.3335
14	PreDox1	140.205	92.1094	48.0958	159.336	86.4731	72.8633
14	PreDox1	153.369	102.114	51.2547	157.246	88.0047	69.2416
14	PreDox1	163.061	91.6391	71.4216	151.854	84.7593	67.095
14	PreDox1	162.153	108.881	53.2711	153.181	87.3508	65.8304
14	PreDox1	173.638	103.931	69.7068	150.89	87.5777	63.3119
14	PreDox1	168.146	102	66.1454	155.106	90.6239	64.4817
15	PreDox1	162.302	97.7655	64.5366	153.62	81.1385	72.4814
15	PreDox1	146.554	95.3142	51.2394	152.81	82.7958	70.0141
15	PreDox1	158.435	92.1593	66.2752	151.8	81.8101	69.9902
15	PreDox1	162.591	105.179	57.4113	144.598	86.0464	58.552
15	PreDox1	172.226	103.824	68.4023	140.236	84.1655	56.07
16	PreDox1	168.561	100.552	68.0088	148.35	87.0887	61.2614
16	PreDox1	163.289	109.39	53.8996	148.601	85.2024	63.3985
16	PreDox1	176.097	106.342	69.7552	148.086	85.7017	62.3841
16	PreDox1	159.521	110.452	49.0684	151.705	85.3555	66.3492
16	PreDox1	159.723	112.176	47.5468	139.651	84.481	55.1702
17	PreDox1	143.21	93.3388	49.8714	159.222	86.2992	72.9232
17	PreDox1	149.748	93.916	55.8324	156.552	88.0075	68.545
17	PreDox1	154.477	98.0757	56.4011	153.995	87.8969	66.0976
18	PreDox1	149.843	79.1161	70.7265	157.613	98.2724	59.3408
18	PreDox1	140.708	85.9073	54.8012	159.812	91.1432	68.6684
18	PreDox1	143.952	100.932	43.0209	158.597	91.5175	67.0792
18	PreDox1	144.823	82.1067	62.7162	149.425	95.4687	53.9568
18	PreDox1	142.643	108.895	33.7476	153.548	98.7998	54.748
18	PreDox1	152.164	95.8988	56.2657	153.866	90.8652	63.0004
18	PreDox1	161.77	98.3163	63.4534	154.917	89.7171	65.1998
1	Dox1Day3	172.113	108.576	63.5375	147.516	83.6721	63.844
1	Dox1Day3	173.105	97.2151	75.8896	139.955	82.0613	57.8941
1	Dox1Day3	176.337	112.042	64.2953	140.962	85.7127	55.2491
1	Dox1Day3	171.085	114.86	56.2249	139.048	82.9034	56.1443
1	Dox1Day3	175.559	101.576	73.9826	144.443	81.842	62.601
1	Dox1Day3	173.295	108.124	65.171	139.553	83.9764	55.5764
2	Dox1Day3	175.664	104.367	71.2977	133.17	79.0822	54.0878
2	Dox1Day3	176.554	100.823	75.7315	134.505	78.0396	56.4652
2	Dox1Day3	176.834	97.9364	78.8973	129.622	77.453	52.169
2	Dox1Day3	171.039	106.194	64.8444	129.017	79.3902	49.6267
2	Dox1Day3	173.351	110.75	62.6009	131.334	77.3788	53.955
2	Dox1Day3	173.753	118.791	54.9614	120.285	78.2645	42.0204
7	Dox1Day3	169.157	117.059	52.0981	145.592	93.7602	51.8318
7	Dox1Day3	170.369	113.272	57.097	149.802	90.8137	58.9879
7	Dox1Day3	169.193	102.055	67.1381	154.266	93.1219	61.1441
7	Dox1Day3	164.236	98.7463	65.4898	151.624	96.24	55.3836
7	Dox1Day3	162.824	103.404	59.4208	153.374	92.5477	60.8264
7	Dox1Day3	160.364	109.881	50.4825	155.172	92.2755	62.8964
7	Dox1Day3	148.311	105.117	43.1936	144.524	90.1491	54.3747
7	Dox1Day3	169.085	106.488	62.5965	149.471	95.0645	54.4063
8	Dox1Day3	166.984	106.578	60.4054	150.328	83.183	67.1449
8	Dox1Day3	155.801	106.992	48.8085	148.857	83.8252	65.0316
8	Dox1Day3	168.605	107.62	60.9855	148.596	83.2913	65.3043
8	Dox1Day3	171.209	108.118	63.0915	145.675	86.6587	59.0165
8	Dox1Day3	172.519	102.657	69.8616	144.915	85.6019	59.3135
8	Dox1Day3	175.748	92.2419	83.5059	146.078	83.8085	62.2699
8	Dox1Day3	170.744	105.241	65.5031	140.721	84.8774	55.8432
8	Dox1Day3	172.659	107.04	65.6192	138.298	89.4343	48.8635
9	Dox1Day3	168.155	109.865	58.2902	142.37	98.6926	43.6773
9	Dox1Day3	174.706	113.249	61.4566	148.496	97.3184	51.1772
9	Dox1Day3	163.183	106.56	56.6228	147.643	94.22	53.4233
9	Dox1Day3	165.696	107.281	58.4158	150.567	95.8451	54.7215
9	Dox1Day3	162.521	111.291	51.2295	145.968	99.2015	46.7669
9	Dox1Day3	164.641	105.14	59.5012	151.003	96.8385	54.1643
9	Dox1Day3	161.763	109.633	52.1297	142.776	99.3222	43.4539
9	Dox1Day3	165.707	114.999	50.7077	142.332	101.232	41.1002
10	Dox1Day3	167.862	111.302	56.5594	142.869	91.415	51.4536
10	Dox1Day3	162.844	109.2	53.6441	135.517	88.18	47.3369
10	Dox1Day3	154.327	98.6122	55.7148	145.198	87.4061	57.7918
10	Dox1Day3	156.587	100.557	56.0298	143.306	91.1901	52.1156
10	Dox1Day3	169.423	111.791	57.6317	140.559	92.8381	47.7209
10	Dox1Day3	163.15	100.369	62.7809	139.052	87.3546	51.6973
10	Dox1Day3	160.468	109.735	50.7336	141.993	90.7962	51.1972
12	Dox1Day3	143.251	99.5283	43.7223	148.557	87.8398	60.7171
12	Dox1Day3	154.265	99.2203	55.0452	149.879	87.7672	62.1121
12	Dox1Day3	151.495	102.906	48.5895	142.408	90.5955	51.8126
12	Dox1Day3	136.774	89.1138	47.6597	153.014	88.8473	64.1665
12	Dox1Day3	139.561	79.8343	59.7265	151.712	86.5832	65.1285
12	Dox1Day3	154.177	100.184	53.9933	141.447	91.0445	50.4021
12	Dox1Day3	138.829	82.9602	55.8692	153.831	88.5939	65.237
12	Dox1Day3	146.632	90.395	56.2371	156.159	92.9615	63.1972
13	Dox1Day3	148.715	85.6523	63.063	163.852	90.7912	73.0609
13	Dox1Day3	141.407	89.8921	51.5146	162.373	92.9497	69.4234
13	Dox1Day3	151.281	85.5955	65.6855	163.156	92.4795	70.6767
13	Dox1Day3	152.504	100.572	51.932	158.198	92.1604	66.0373
13	Dox1Day3	152.324	85.8333	66.4904	153.069	94.4362	58.6331
14	Dox1Day3	163.747	99.4519	64.295	153.625	94.2005	59.424
14	Dox1Day3	165.423	98.1239	67.299	150.737	88.3075	62.4292
14	Dox1Day3	134.176	104.083	30.0932	153.664	89.6931	63.971
14	Dox1Day3	164.896	96.5436	68.3524	149.73	90.7617	58.9684
14	Dox1Day3	170.298	76.3504	93.9472	149.963	88.2836	61.6795
15	Dox1Day3	159.787	100.816	58.9713	145.069	77.0065	68.0624
15	Dox1Day3	149.523	90.5967	58.9265	146.052	72.3611	73.6914
15	Dox1Day3	161.659	92.4761	69.1826	140.771	78.0759	62.6946
15	Dox1Day3	158.67	91.8055	66.8647	143.971	73.5045	70.4665
15	Dox1Day3	155.78	97.9414	57.8389	139.207	70.8755	68.3316
15	Dox1Day3	144.78	91.9287	52.8512	143.622	72.7696	70.8525
16	Dox1Day3	157.663	91.6087	66.0545	151.524	89.371	62.1531
16	Dox1Day3	159.66	96.3823	63.2775	151.656	92.0612	59.5949
16	Dox1Day3	145.234	106.798	38.4366	152.893	93.2576	59.6355
16	Dox1Day3	139.749	96.959	42.7904	157.42	94.2496	63.1705
16	Dox1Day3	172.204	87.6337	84.5707	145.992	90.671	55.3207
16	Dox1Day3	165.835	94.5874	71.2479	150.732	90.3811	60.3504
17	Dox1Day3	161.66	94.4125	67.2471	155.588	86.4668	69.1208
17	Dox1Day3	163.611	84.4438	79.1671	152.509	85.0563	67.453
17	Dox1Day3	165.902	94.2614	71.6411	153.136	86.7669	66.369
17	Dox1Day3	158.458	94.1714	64.2867	147.964	91.3684	56.5955
17	Dox1Day3	162.323	81.8995	80.4233	138.277	90.7777	47.4992
17	Dox1Day3	170.871	99.0349	71.8358	134.264	87.1175	47.1467
18	Dox1Day3	158.729	104.449	54.2803	153.32	90.9319	62.3884
18	Dox1Day3	154.645	108.363	46.2825	153.721	90.7525	62.9687
18	Dox1Day3	160.593	91.5053	69.0879	156.5	93.8776	62.6228
18	Dox1Day3	164.632	107.88	56.7521	153.482	89.1922	64.2896
18	Dox1Day3	161.947	108.05	53.8976	148.531	91.4405	57.09
18	Dox1Day3	166.512	97.2332	69.2791	146.965	92.1428	54.8222
1	Dox1Day5	154.622	99.4771	55.1448	150.105	86.1522	63.9529
1	Dox1Day5	148.904	101.177	47.7275	148.449	84.2141	64.2347
1	Dox1Day5	145.612	99.6238	45.9882	146.408	84.1945	62.2135
1	Dox1Day5	132.903	103.026	29.8763	159.136	86.3241	72.8123
1	Dox1Day5	148.849	98.9689	49.8798	155.907	84.8976	71.0097
1	Dox1Day5	150.836	94.7576	56.0787	151.059	82.7585	68.3003
2	Dox1Day5	146.149	90.6501	55.4991	141.212	81.2645	59.9472
2	Dox1Day5	146.68	86.5653	60.1148	142.8	78.5496	64.2508
2	Dox1Day5	154.171	98.9433	55.2281	136.773	80.0046	56.7682
2	Dox1Day5	157.05	100.119	56.9313	137.927	82.1692	55.7574
2	Dox1Day5	147.052	104.74	42.3118	140.373	79.372	61.0013
2	Dox1Day5	150.833	100.803	50.0304	140.758	77.446	63.3116
7	Dox1Day5	164.077	118.356	45.7214	151.944	86.4176	65.5264
7	Dox1Day5	158.142	110.775	47.367	153.677	82.0654	71.6115
7	Dox1Day5	163.453	104.52	58.9327	152.889	81.4713	71.4179
7	Dox1Day5	160.327	102.34	57.9864	151.432	84.1852	67.2472
7	Dox1Day5	157.239	104.202	53.0361	142.521	84.8943	57.6264
7	Dox1Day5	160.102	107.362	52.7406	144.892	84.8674	60.0242
7	Dox1Day5	159.692	115.004	44.6889	144.985	85.3158	59.6691
7	Dox1Day5	157.074	114.77	42.3042	132.263	88.1763	44.087
8	Dox1Day5	168.413	94.4536	73.9596	151.835	84.5344	67.3009
8	Dox1Day5	153.261	98.9552	54.3059	154.281	84.8747	69.4061
8	Dox1Day5	162.274	108.104	54.1699	150.591	84.2302	66.3606
8	Dox1Day5	150.195	101.218	48.9767	155.703	87.1496	68.5537
8	Dox1Day5	161.472	92.7755	68.6961	155.394	87.3395	68.0541
8	Dox1Day5	160.828	107.079	53.7493	145.289	84.7718	60.5173
8	Dox1Day5	165.029	108.181	56.8487	153.692	86.7137	66.9784
8	Dox1Day5	161.162	105.221	55.941	145.592	85.7048	59.8876
9	Dox1Day5	157.429	104.502	52.9274	150.852	92.8703	57.9816
9	Dox1Day5	164.815	100.338	64.4773	152.249	89.6554	62.5935
9	Dox1Day5	165.648	100.583	65.0653	152.546	91.4375	61.1083
10	Dox1Day5	160.818	95.6573	65.1609	161.133	93.5672	67.5656
10	Dox1Day5	159.131	83.001	76.1302	157.046	92.659	64.3875
10	Dox1Day5	147.932	95.2709	52.661	153.247	95.1466	58.1008
10	Dox1Day5	157.058	97.9371	59.1214	155.682	96.4519	59.23
10	Dox1Day5	151.184	100.01	51.174	160.078	95.4683	64.6098
10	Dox1Day5	155.469	109.298	46.1712	155.727	100.245	55.4818
12	Dox1Day5	155.949	102.885	53.0646	148.2	86.775	61.4255
12	Dox1Day5	150.621	103.331	47.2905	148.744	84.3741	64.3696
12	Dox1Day5	154.91	109.118	45.7919	135.554	85.4721	50.0818
12	Dox1Day5	158.015	87.2679	70.7471	138.966	88.9678	49.9983
12	Dox1Day5	163.37	107.526	55.8439	140.501	87.9306	52.57
13	Dox1Day5	157.13	88.3592	68.7707	151.408	88.1204	63.2872
13	Dox1Day5	152.91	98.7839	54.1261	148.251	88.9675	59.2838
13	Dox1Day5	153.352	97.2883	56.0639	144.981	88.2587	56.7222
13	Dox1Day5	156.239	99.4189	56.8205	152.889	88.9684	63.9207
14	Dox1Day5	168.953	108.611	60.3415	144.128	87.2911	56.8365
14	Dox1Day5	167.604	114.703	52.901	149.173	86.9273	62.2456
14	Dox1Day5	163.665	114.342	49.3233	149.189	87.7826	61.4068
14	Dox1Day5	177.523	111.336	66.1875	144.83	87.5296	57.3003
14	Dox1Day5	157.574	110.338	47.2366	151.031	83.3427	67.6879
15	Dox1Day5	169.951	95.4498	74.5014	156.07	84.428	71.6421
15	Dox1Day5	159.722	90.4754	69.2468	146.657	83.4982	63.1587
15	Dox1Day5	169.915	110.72	59.1954	139.72	90.7103	49.0093
15	Dox1Day5	166.336	116.535	49.8017	137.493	86.5739	50.919
15	Dox1Day5	152.384	104.072	48.3118	138.903	86.397	52.5056
15	Dox1Day5	162.79	98.0098	64.7807	148.324	83.6489	64.6756
15	Dox1Day5	150.136	97.9075	52.2288	147.016	84.4513	62.5649
15	Dox1Day5	162.04	104.098	57.9418	147.593	83.063	64.5296
16	Dox1Day5	153.068	107.349	45.7182	154.468	85.8061	68.6622
16	Dox1Day5	151.16	106.25	44.9096	154.859	85.1879	69.6707
16	Dox1Day5	165.049	107.39	57.659	145.522	86.448	59.0736
16	Dox1Day5	173.962	99.4136	74.5485	145.371	84.437	60.9341
16	Dox1Day5	159.707	107.977	51.73	149.108	86.0958	63.0121
16	Dox1Day5	164.87	105.719	59.1517	149.337	83.5256	65.8113
16	Dox1Day5	158.785	98.268	60.5167	147.845	86.2106	61.6347
17	Dox1Day5	157.776	104.142	53.634	147.579	89.5513	58.0281
17	Dox1Day5	165.226	97.2728	67.9531	145.567	83.6793	61.8881
17	Dox1Day5	160.576	105.212	55.3643	157.197	84.1865	73.01
17	Dox1Day5	159.119	101.585	57.5341	155.702	84.9001	70.8022
17	Dox1Day5	156.486	105.747	50.7395	152.742	87.3131	65.4289
18	Dox1Day5	144.089	105.124	38.9647	157.896	92.664	65.2323
18	Dox1Day5	143.52	102.364	41.1564	161.642	92.5953	69.0464
18	Dox1Day5	154.812	102.786	52.0253	160.849	95.0934	65.7552
18	Dox1Day5	161.864	104.487	57.3766	160.327	89.7577	70.5689
18	Dox1Day5	150.395	85.0654	65.3297	160.661	91.7565	68.905
18	Dox1Day5	149.777	106.374	43.4034	164.995	90.5132	74.4813
1	Dox1Day8	151.461	91.572	59.8889	146.375	83.94	62.4353
1	Dox1Day8	169.061	101.933	67.1285	144.925	82.1183	62.8067
1	Dox1Day8	165.939	92.5115	73.4273	142.572	83.5702	59.0015
1	Dox1Day8	154.621	94.1722	60.4492	139.888	92.0447	47.8436
1	Dox1Day8	147.293	86.2564	61.0364	148.79	90.0538	58.7358
1	Dox1Day8	155.632	93.676	61.9558	153.415	85.1041	68.311
1	Dox1Day8	146.421	98.7557	47.6652	148.445	82.4011	66.0435
1	Dox1Day8	146.758	88.5209	58.2367	144.583	86.3825	58.2006
2	Dox1Day8	167.242	86.2284	81.0134	135.543	79.8946	55.6489
2	Dox1Day8	173.841	98.427	75.4139	134.775	80.0043	54.7709
2	Dox1Day8	165.15	104.886	60.264	130.391	78.5466	51.8447
2	Dox1Day8	155.12	106.629	48.4904	136.99	82.8125	54.177
2	Dox1Day8	155.848	109.113	46.7348	134.315	79.4039	54.9109
2	Dox1Day8	157.71	106.68	51.0306	132.129	81.8618	50.2676
7	Dox1Day8	164.835	95.5811	69.2538	148.936	86.6194	62.3164
7	Dox1Day8	160.482	102.74	57.7426	151.119	86.3233	64.7953
7	Dox1Day8	166.237	108.394	57.8433	149.524	88.6991	60.8251
7	Dox1Day8	161.337	100.092	61.2445	149.336	87.597	61.7385
7	Dox1Day8	162.063	97.9687	64.094	158.988	86.7018	72.286
7	Dox1Day8	157.682	107.579	50.1025	155.629	88.234	67.3948
7	Dox1Day8	161.095	102.081	59.0138	155.735	92.0084	63.7262
8	Dox1Day8	161.268	103.716	57.5517	142.607	87.1737	55.433
8	Dox1Day8	142.952	99.7443	43.2076	140.512	82.5232	57.989
8	Dox1Day8	150.723	94.3312	56.3916	138.998	82.5847	56.4138
8	Dox1Day8	157.266	86.2388	71.0269	152.542	81.1384	71.4031
8	Dox1Day8	154.916	84.2034	70.713	153.102	79.8009	73.3016
8	Dox1Day8	158.14	97.6995	60.44	148.045	86.2082	61.8365
9	Dox1Day8	159.08	107.068	52.012	148.619	103.721	44.8984
9	Dox1Day8	153.216	107.406	45.8102	154.581	92.6997	61.8817
9	Dox1Day8	152.267	108.136	44.13	154.106	90.0085	64.0978
9	Dox1Day8	143.077	102.041	41.0358	149.157	90.0753	59.0813
9	Dox1Day8	145.863	90.4954	55.3678	139.409	92.8097	46.5994
9	Dox1Day8	150.895	109.658	41.2366	141.161	96.9107	44.2504
9	Dox1Day8	143.646	105.922	37.7242	142.264	101.268	40.9954
10	Dox1Day8	166.217	107.708	58.5087	151.937	88.0318	63.9055
10	Dox1Day8	162.974	108.539	54.4348	157.224	87.311	69.9131
10	Dox1Day8	149.207	92.7425	56.4649	151.338	87.0975	64.2408
10	Dox1Day8	154.239	108.27	45.9698	156.694	92.162	64.5319
12	Dox1Day8	162.199	110.023	52.1763	148.573	90.5227	58.0505
12	Dox1Day8	165.296	95.2109	70.0855	148.344	87.4097	60.934
12	Dox1Day8	151.03	97.4892	53.5407	157.558	93.1332	64.4251
13	Dox1Day8	142.517	95.9964	46.5201	162.735	91.8753	70.86
13	Dox1Day8	136.761	91.122	45.6386	161.963	98.8585	63.105
13	Dox1Day8	146.548	106.096	40.4522	161.871	93.8797	67.9908
13	Dox1Day8	146.149	90.7623	55.3871	161.822	92.2833	69.5385
14	Dox1Day8	166.161	100.828	65.3326	147.883	87.6943	60.1885
14	Dox1Day8	147.537	96.3983	51.1382	154.874	88.4884	66.3853
14	Dox1Day8	157.585	101.674	55.9107	153.797	93.9663	59.8304
14	Dox1Day8	154.901	98.82	56.081	153.86	90.0068	63.8532
14	Dox1Day8	156.933	105.937	50.9955	155.407	89.0024	66.4046
15	Dox1Day8	151.181	98.852	52.3288	140.198	94.1502	46.0481
15	Dox1Day8	146.792	109.64	37.1518	134.525	91.4765	43.0482
15	Dox1Day8	154.856	99.7066	55.1495	132.982	94.2108	38.7715
15	Dox1Day8	165.441	98.0671	67.374	144.139	85.701	58.4377
15	Dox1Day8	157.419	108.131	49.2876	140.943	82.4609	58.4822
15	Dox1Day8	159.738	106.241	53.4969	136.931	91.9577	44.9729
15	Dox1Day8	147.843	115.303	32.5399	144.766	89.118	55.6477
15	Dox1Day8	140.482	99.091	41.3915	150.821	85.5886	65.232
15	Dox1Day8	146.767	90.2101	56.5566	146.282	85.5996	60.6824
15	Dox1Day8	149.132	89.5004	59.6321	156.45	86.7423	69.7074
15	Dox1Day8	157.174	103.765	53.4099	143.484	89.6601	53.8236
15	Dox1Day8	148.277	106.994	41.2821	145.949	89.0837	56.8653
15	Dox1Day8	159.59	97.8371	61.7533	151.456	89.5783	61.878
16	Dox1Day8	160.971	109.288	51.6828	138.813	86.7631	52.0495
16	Dox1Day8	170.727	106.391	64.3365	143.923	88.2722	55.6503
16	Dox1Day8	166.89	97.936	68.9541	142.861	86.7318	56.1288
16	Dox1Day8	157.864	107.886	49.9776	147.378	85.2109	62.1672
16	Dox1Day8	161.918	87.9221	73.9961	152.101	84.4007	67.7007
17	Dox1Day8	157.717	80.1884	77.5288	151.95	84.1936	67.7565
17	Dox1Day8	157.401	90.3874	67.0133	151.924	82.6714	69.253
17	Dox1Day8	158.884	99.8954	58.9883	147.455	84.8824	62.5721
17	Dox1Day8	159.565	100.308	59.2574	146.122	87.4526	58.6693
17	Dox1Day8	164.46	86.148	78.3125	148.613	87.7755	60.8375
17	Dox1Day8	164.956	99.1377	65.818	144.048	88.6433	55.4044
17	Dox1Day8	168.374	96.5792	71.7952	140.21	91.1471	49.0631
17	Dox1Day8	151.634	99.8642	51.7702	158.865	87.8174	71.0479
17	Dox1Day8	156.851	94.3265	62.5247	153.898	90.8565	63.0414
18	Dox1Day8	155.438	76.496	78.9419	155.408	91.6065	63.802
18	Dox1Day8	160.251	100.232	60.0192	155.585	90.5007	65.0846
18	Dox1Day8	155.068	107.333	47.7349	155.734	89.8861	65.8483
18	Dox1Day8	144.39	98.533	45.8571	158.33	91.8729	66.4569
18	Dox1Day8	149.903	98.3933	51.5102	151.665	92.6703	58.9952
1	DoxOff	165.2	73.7464	91.4534	156.575	89.3222	67.2525
1	DoxOff	168.295	97.7806	70.5143	153.235	85.9474	67.2873
1	DoxOff	145.009	83.4357	61.573	154.957	94.2275	60.7294
1	DoxOff	161.531	85.0586	76.4721	145.303	90.4756	54.8273
1	DoxOff	148.634	90.9179	57.7159	153.491	90.4301	63.0613
2	DoxOff	161.051	102.384	58.6672	140.695	83.8258	56.8688
2	DoxOff	156.449	106.249	50.1996	145.034	84.6889	60.3452
2	DoxOff	149.69	112.31	37.3797	153.641	90.18	63.4612
2	DoxOff	138.855	106.849	32.006	151.078	85.4693	65.6092
2	DoxOff	154.558	114.444	40.114	153.431	89.2737	64.1572
2	DoxOff	150.641	109.223	41.4182	148.146	86.6031	61.5432
2	DoxOff	152.386	96.3924	55.9938	147.975	89.813	58.1615
2	DoxOff	141.978	107.478	34.5007	157.832	90.0601	67.7716
2	DoxOff	149.918	105.03	44.8882	140.163	89.9141	50.249
2	DoxOff	165.977	101.449	64.5282	139.523	89.1396	50.3837
7	DoxOff	149.879	99.6425	50.2367	163.886	91.7741	72.1118
7	DoxOff	158.723	90.4018	68.3212	159.769	91.78	67.9893
7	DoxOff	154.641	89.173	65.4682	157.699	96.5366	61.162
7	DoxOff	160.975	95.0179	65.9574	151.319	92.7799	58.5389
7	DoxOff	162.254	98.4137	63.8405	155.243	94.7662	60.4773
8	DoxOff	169.922	100.454	69.4674	153.287	87.816	65.4713
8	DoxOff	165.8	106.91	58.8899	151.38	85.8134	65.5665
8	DoxOff	167.164	106.629	60.5348	152.178	84.734	67.4441
8	DoxOff	147.962	110.202	37.7598	146.388	89.1599	57.2285
8	DoxOff	158.874	103.939	54.9344	151.332	85.746	65.5864
8	DoxOff	151.888	93.803	58.0847	153.723	88.2695	65.4532
8	DoxOff	152.908	98.191	54.7165	156.865	85.7715	71.0935
8	DoxOff	134.077	90.7429	43.3336	156.905	82.2814	74.6237
8	DoxOff	137.068	93.2224	43.8455	154.684	87.4616	67.2223
8	DoxOff	155.397	103.084	52.3127	155.195	85.4295	69.7656
8	DoxOff	154.592	104.008	50.584	150.801	87.054	63.7473
9	DoxOff	156.992	90.0997	66.8923	150.989	84.3894	66.5992
9	DoxOff	154.611	91.82	62.7913	154.435	83.8776	70.557
9	DoxOff	153.304	91.8399	61.4637	153.694	80.6054	73.0887
9	DoxOff	154.983	101.949	53.0335	144.787	85.1222	59.6651
9	DoxOff	162.385	98.1728	64.2124	147.152	80.9632	66.1888
9	DoxOff	166.161	100.297	65.8635	140.325	87.5293	52.7952
9	DoxOff	162.35	103.782	58.5675	143.501	81.2248	62.2764
9	DoxOff	139.482	94.1164	45.366	151.65	91.931	59.7187
9	DoxOff	162.801	99.0019	63.7994	142.941	85.4555	57.4853
9	DoxOff	146.938	108.063	38.8751	144.859	85.8643	58.9944
9	DoxOff	167.878	99.7506	68.1269	148.197	87.1827	61.014
9	DoxOff	164.671	95.7142	68.9566	150.233	84.5876	65.6454
9	DoxOff	151.017	108.312	42.705	146.547	86.5752	59.9719
10	DoxOff	163.827	109.831	53.996	155.038	86.9281	68.1098
10	DoxOff	153.053	102.241	50.8119	153.908	87.3932	66.5144
10	DoxOff	164.315	108.533	55.7818	155.373	89.5274	65.8452
10	DoxOff	164.47	104.355	60.1151	152.32	87.024	65.2959
10	DoxOff	160.301	108.418	51.8825	152.498	86.7249	65.7732
10	DoxOff	161.812	103.648	58.1638	157.301	87.7506	69.5502
12	DoxOff	149.985	107.99	41.9942	151.964	91.7097	60.2546
12	DoxOff	158.217	95.6135	62.6035	152.534	88.2935	64.2402
12	DoxOff	154.611	96.6697	57.9414	152.192	87.2757	64.9158
12	DoxOff	163.88	91.7322	72.1477	147.813	88.1571	59.6561
12	DoxOff	163.319	101.021	62.2985	146.847	91.0382	55.8093
12	DoxOff	163.282	94.1065	69.1759	146.356	88.3746	57.9812
12	DoxOff	165.321	101.523	63.7982	148.144	89.917	58.2273
12	DoxOff	162.944	106.769	56.175	145.637	91.6965	53.9408
13	DoxOff	153.261	112.554	40.7062	156.131	92.5578	63.5735
13	DoxOff	156.869	96.8871	59.9814	159.185	93.0475	66.1374
13	DoxOff	153.521	92.133	61.3879	156.232	91.2888	64.9433
13	DoxOff	157.98	118.668	39.312	143.802	97.7534	46.0481
13	DoxOff	158.571	119.254	39.3174	146.634	97.3714	49.2628
13	DoxOff	147.074	95.1558	51.9185	167.067	95.3205	71.7469
13	DoxOff	141.964	99.24	42.7236	161.93	92.4895	69.4403
13	DoxOff	144.949	94.614	50.3349	158.347	92.5611	65.7862
13	DoxOff	142.808	100.373	42.4345	150.702	98.9544	51.7479
13	DoxOff	142.612	108.013	34.5984	154.411	94.4892	59.9217
13	DoxOff	155.038	93.7871	61.2512	155.982	94.6594	61.3227
13	DoxOff	151.305	106.28	45.0244	155.7	94.3141	61.3859
14	DoxOff	154.073	105.465	48.6075	150.743	83.4417	67.3014
14	DoxOff	163.34	106.462	56.8787	147.894	81.6511	66.243
14	DoxOff	150.822	113.088	37.7335	146.619	82.5343	64.0844
14	DoxOff	151.616	104.81	46.8062	141.081	78.7171	62.3638
14	DoxOff	159.216	113.655	45.5605	144.604	81.0494	63.555
15	DoxOff	163.997	104.54	59.4572	133.975	79.9006	54.0742
15	DoxOff	168.38	89.6112	78.7692	137.574	79.0143	58.5601
15	DoxOff	164.237	110.389	53.8482	139.035	79.5733	59.4615
15	DoxOff	159.69	100.448	59.2418	142.105	80.177	61.9279
16	DoxOff	159.838	98.4938	61.3442	164.233	100.47	63.7627
16	DoxOff	152.946	102.183	50.763	165.909	93.0209	72.8882
16	DoxOff	151.642	103.432	48.2099	162.02	95.9674	66.053
16	DoxOff	149.665	96.0238	53.6411	160.788	96.0114	64.777
16	DoxOff	150.648	103.758	46.8899	156.097	99.2456	56.8509
17	DoxOff	158.026	92.6457	65.3808	152.552	83.4136	69.1385
17	DoxOff	158.679	88.8358	69.8434	153.512	82.686	70.826
17	DoxOff	151.063	104.113	46.9498	150.804	86.4072	64.3964
17	DoxOff	160.032	77.5708	82.4612	153.998	82.6828	71.3153
18	DoxOff	145.733	101.438	44.2954	154.721	91.2625	63.4586
18	DoxOff	163.3	93.7465	69.5536	151.385	90.4302	60.9547
18	DoxOff	169.223	99.9469	69.276	147.789	86.3139	61.4755
18	DoxOff	163.03	88.6516	74.3788	154.399	94.0463	60.3522
18	DoxOff	162.252	94.8093	67.4431	151.672	88.2833	63.3883
18	DoxOff	164.029	104.045	59.9845	152.065	90.9997	61.0652
12	SugarCon	172.78	101.755	71.025	140.919	98.0709	42.8477
12	SugarCon	155.591	109.028	46.5626	148.025	94.221	53.8036
12	SugarCon	158.939	94.2987	64.6406	143.194	85.4798	57.7146
12	SugarCon	165.573	101.342	64.2315	142.891	92.1882	50.7026
12	SugarCon	153.613	105.301	48.312	141.671	84.6233	57.0481
12	SugarCon	146.094	106.637	39.4568	138.201	90.982	47.2185
12	SugarCon	160.226	96.8221	63.4042	155.029	87.4205	67.6088
12	SugarCon	150.179	92.3619	57.8175	148.061	90.9734	57.0878
13	SugarCon	154.608	97.1376	57.4709	158.596	97.4874	61.1083
13	SugarCon	149.559	107.605	41.9543	156.497	96.3153	60.1812
13	SugarCon	160.086	105.41	54.676	157.96	94.8967	63.0638
13	SugarCon	164.949	101.273	63.6757	153.886	96.7202	57.1653
13	SugarCon	162.552	97.5074	65.045	152.856	94.8945	57.9619
13	SugarCon	163.807	99.9271	63.8799	147.975	96.1697	51.8052
13	SugarCon	157.131	98.6984	58.4327	154.922	94.3062	60.6154
13	SugarCon	167.598	107.938	59.6597	155.351	94.248	61.1033
13	SugarCon	153.993	101.031	52.9615	149.85	94.1985	55.6511
13	SugarCon	147.245	102.146	45.0997	145.188	96.728	48.4596
13	SugarCon	151.722	100.092	51.6298	155.323	99.6482	55.6751
13	SugarCon	171.143	110.143	61.0004	157.933	94.3912	63.5415
13	SugarCon	159.61	98.3209	61.2894	155.542	96.2713	59.2705
13	SugarCon	156.859	97.3749	59.4836	156.851	98.9369	57.9144
14	SugarCon	174.893	104.565	70.3285	145.714	85.5729	60.1406
14	SugarCon	177.521	105.769	71.7527	145.183	83.7824	61.4002
14	SugarCon	171.186	108.089	63.0978	145.518	87.4832	58.0345
14	SugarCon	165.7	102.936	62.7638	148.469	86.1388	62.3307
14	SugarCon	170.865	103.897	66.9677	143.73	82.6829	61.0475
14	SugarCon	168.324	97.6974	70.6263	147.392	83.3819	64.01
14	SugarCon	175.169	111.371	63.7978	146.258	88.7579	57.4998
14	SugarCon	161.376	93.5989	67.7768	142.899	84.0183	58.8809
14	SugarCon	160.516	101.214	59.3014	141.162	84.5818	56.5803
14	SugarCon	162.465	96.2439	66.2212	145.948	84.8749	61.0732
14	SugarCon	176.726	100.085	76.6407	143.12	87.3822	55.7374
14	SugarCon	158.765	93.4082	65.3567	143.96	84.3801	59.5795
15	SugarCon	175.346	106.389	68.957	148.108	92.6244	55.4838
15	SugarCon	165.174	99.7329	65.4416	152.618	89.202	63.416
15	SugarCon	162.007	109.567	52.4404	150.609	86.7129	63.8957
15	SugarCon	170.971	105.195	65.7766	151.956	83.4127	68.543
15	SugarCon	166.643	105.454	61.189	150.083	84.4386	65.6446
15	SugarCon	137.056	91.0722	45.9837	141.025	89.4772	51.5475
15	SugarCon	146.832	108.645	38.1869	149.072	89.5656	59.5062
15	SugarCon	157.259	95.7994	61.4601	150.72	89.8987	60.8217
15	SugarCon	149.793	93.403	56.3898	143.595	93.7869	49.8083
15	SugarCon	151.202	109.003	42.1989	144.391	91.0151	53.3754
15	SugarCon	173.486	111.593	61.8928	145.668	95.9673	49.7009
15	SugarCon	158.562	95.8044	62.7577	140.661	93.5876	47.0739
15	SugarCon	148.845	98.816	50.0292	145.309	90.5494	54.7601
15	SugarCon	152.283	107.811	44.4713	147.251	87.0643	60.1865
16	SugarCon	159.57	106.848	52.7221	143.586	88.5346	55.0516
16	SugarCon	154.027	102.414	51.6129	154.477	82.9654	71.5113
16	SugarCon	155.499	98.3517	57.1476	147.795	81.5798	66.2156
16	SugarCon	171.61	103.252	68.3578	147.749	82.81	64.9389
16	SugarCon	167.597	106.735	60.8628	145.724	84.9917	60.7326
16	SugarCon	161.785	111.904	49.8815	143.307	85.9946	57.3129
16	SugarCon	168.257	106.826	61.4312	135.522	88.3037	47.218
17	SugarCon	163.874	105.501	58.3729	150.165	90.671	59.4941
17	SugarCon	167.051	101.604	65.4472	149.581	88.333	61.2476
17	SugarCon	169.102	104.83	64.2716	147.109	89.8918	57.2169
17	SugarCon	164.319	102.085	62.2343	151.393	86.2296	65.1637
17	SugarCon	160.106	100.238	59.8681	148.64	89.065	59.5748
17	SugarCon	157.839	104.873	52.9655	151.574	88.2446	63.329
17	SugarCon	160.079	105.413	54.6663	151.995	94.155	57.8398
17	SugarCon	161.415	112.301	49.1149	153.34	95.071	58.2695
17	SugarCon	168.31	108.906	59.4038	144.287	93.3596	50.9273
17	SugarCon	172.167	94.486	77.6805	144.633	88.7916	55.8413
17	SugarCon	164.013	110.053	53.96	151.698	90.8778	60.8201
18	SugarCon	163.707	98.2464	65.461	155.648	94.4732	61.1747
18	SugarCon	160.202	98.9839	61.2178	159.621	92.2721	67.3493
18	SugarCon	154.398	106.076	48.3218	155.716	95.8197	59.8967
18	SugarCon	151.379	87.8109	63.5679	164.891	93.8379	71.0527
18	SugarCon	152.28	95.4797	56.8	155.819	94.1148	61.7046
18	SugarCon	152.414	93.835	58.5791	154.918	98.0767	56.8411
18	SugarCon	169.845	87.0011	82.8441	156.29	97.4585	58.832
18	SugarCon	159.62	98.6967	60.9234	154.797	95.4419	59.3553
18	SugarCon	148.439	99.8096	48.6295	155.745	96.3199	59.4254
18	SugarCon	147.632	107.08	40.5514	154.813	100.199	54.6136
18	SugarCon	150.539	103.206	47.3331	157.86	93.8612	63.9984
1	PreDox2	132.683	95.373	37.3098	152.082	85.4744	66.6074
1	PreDox2	142.035	99.9747	42.0601	146.691	81.8711	64.8203
1	PreDox2	138.75	99.3575	39.3925	150.43	82.268	68.1617
1	PreDox2	146.151	95.5172	50.6334	144.561	85.057	59.5039
2	PreDox2	161.906	102.842	59.064	135.782	80.3443	55.4379
2	PreDox2	170.126	108.371	61.7546	138.28	77.6884	60.5917
2	PreDox2	149.844	102.166	47.6788	127.665	78.5585	49.1062
2	PreDox2	150.976	108.952	42.0241	131.384	81.4044	49.9798
2	PreDox2	147.535	105.365	42.1699	141.935	80.9533	60.9821
2	PreDox2	153.441	104.77	48.6709	137.675	75.7361	61.9392
7	PreDox2	151.939	94.9319	57.0072	166.179	91.1832	74.9959
7	PreDox2	152.201	100.635	51.5656	167.416	89.8076	77.6084
7	PreDox2	151.661	98.1557	53.505	165.172	89.2732	75.8991
7	PreDox2	159.262	105.313	53.949	160.041	90.6492	69.3921
7	PreDox2	158.284	103.34	54.9441	156.786	92.5204	64.2656
8	PreDox2	164.531	113.454	51.0765	144.799	81.9525	62.8468
8	PreDox2	167.405	114.195	53.2094	154.689	80.6034	74.0859
8	PreDox2	149.237	111.408	37.8286	153.255	86.6165	66.6383
8	PreDox2	152.806	107.818	44.9875	139.084	81.5111	57.5734
8	PreDox2	169.17	118.234	50.9356	150.583	82.6004	67.9823
9	PreDox2	159.071	110.718	48.3534	153.966	93.5816	60.3843
9	PreDox2	163.348	93.8231	69.5252	152.622	88.0968	64.525
9	PreDox2	163.971	106.958	57.0125	145.46	88.7035	56.7567
9	PreDox2	157.21	101.66	55.5498	152.712	89.9479	62.7643
9	PreDox2	155.535	98.9628	56.5721	155.13	89.9497	65.18
9	PreDox2	138.08	100.576	37.5046	141.854	96.7147	45.1394
9	PreDox2	145.467	99.1767	46.2905	150.587	94.6074	55.9795
9	PreDox2	146.55	101.526	45.0242	148.151	94.4966	53.6545
10	PreDox2	158.443	112.996	45.4467	150.517	89.7162	60.8009
10	PreDox2	166.524	106.367	60.1563	150.576	87.0933	63.4823
10	PreDox2	147.986	95.8218	52.1642	154.711	92.8761	61.8345
10	PreDox2	137.659	99.9438	37.7155	138.186	89.7124	48.4734
10	PreDox2	151.781	100.188	51.5927	150.324	90.5148	59.8093
10	PreDox2	145.337	103.141	42.1963	154.969	93.468	61.5008
10	PreDox2	146.355	104.653	41.7018	143.815	91.832	51.9833
10	PreDox2	140.839	103.255	37.5841	148.756	93.3798	55.3764
12	PreDox2	162.653	112.663	49.9895	135.263	87.9267	47.3367
12	PreDox2	166.904	105.209	61.6952	140.954	85.1975	55.756
12	PreDox2	162.841	95.3667	67.4738	137.22	84.5487	52.6712
12	PreDox2	153.321	102.914	50.4075	139.569	87.8128	51.7566
12	PreDox2	158.069	101.617	56.4521	137.411	86.3806	51.0302
12	PreDox2	165.075	96.787	68.2876	136.627	87.1461	49.4806
12	PreDox2	159.48	96.1374	63.3425	137.391	87.2632	50.1276
13	PreDox2	166.063	96.5597	69.5035	159.34	93.9631	65.3774
13	PreDox2	151.985	103.024	48.9615	158.569	88.4145	70.1546
13	PreDox2	158.707	94.7161	63.9908	156.655	93.2244	63.4303
13	PreDox2	157.914	111.629	46.2843	158.946	97.7589	61.1871
13	PreDox2	152.281	102.68	49.6006	162.795	95.4297	67.3654
14	PreDox2	162.206	100.876	61.3304	156.883	92.4243	64.4591
14	PreDox2	149.415	93.469	55.9455	157.462	85.308	72.1538
14	PreDox2	162.976	106.663	56.3134	146.892	91.5992	55.2928
14	PreDox2	157.221	97.9934	59.2275	147.142	88.9198	58.222
14	PreDox2	156.992	95.741	61.251	147.49	86.6411	60.8486
14	PreDox2	176.194	93.0039	83.19	146.855	86.7079	60.1467
14	PreDox2	161.563	95.2208	66.3424	150.265	90.051	60.2143
14	PreDox2	152.957	93.3306	59.6266	157.306	84.9137	72.3923
14	PreDox2	158.972	91.9442	67.0282	147.089	88.7075	58.3816
15	PreDox2	153.493	76.2144	77.2782	148.45	86.051	62.3989
15	PreDox2	168.346	93.8112	74.5347	152.552	85.4413	67.1104
15	PreDox2	166.042	98.221	67.8212	156.255	86.6473	69.6078
15	PreDox2	163.127	90.8258	72.3012	151.542	87.1878	64.3546
15	PreDox2	156.269	86.3091	69.9602	155.133	86.0577	69.0749
15	PreDox2	155.248	85.5844	69.6641	153.694	86.4171	67.2767
15	PreDox2	178.058	93.6361	84.4221	153.884	91.3374	62.5464
15	PreDox2	168.797	85.0821	83.7147	152.2	87.6754	64.5249
15	PreDox2	170.224	85.5541	84.6696	147.268	86.2497	61.0185
15	PreDox2	164.637	97.7446	66.8923	146.559	90.3027	56.2559
15	PreDox2	165.173	103.189	61.9842	152.093	83.7634	68.3294
16	PreDox2	166.512	110.589	55.9229	160.167	82.3052	77.8623
16	PreDox2	171.473	109.811	61.6617	152.09	86.0501	66.0404
16	PreDox2	158.023	102.445	55.5777	147.861	86.2848	61.5758
16	PreDox2	171.303	113.846	57.457	149.91	87.9699	61.9401
17	PreDox2	175.09	101.916	73.1746	142.832	89.6951	53.1366
17	PreDox2	163.147	104.01	59.1364	145.89	87.7746	58.1156
17	PreDox2	168.404	98.3851	70.0193	144.323	87.5601	56.7631
17	PreDox2	172.583	105.799	66.7839	143.131	89.1434	53.988
17	PreDox2	151.442	89.8622	61.5796	153.871	86.2491	67.6221
18	PreDox2	170.52	89.7847	80.7357	160.779	96.1891	64.5897
18	PreDox2	161.447	96.198	65.2493	158.061	93.3061	64.7544
18	PreDox2	157.038	93.9984	63.0399	162.196	93.2227	68.9737
18	PreDox2	172.182	90.9248	81.257	160.914	96.5487	64.3654
18	PreDox2	163.62	93.6455	69.9743	158.667	95.9346	62.7325
18	PreDox2	159.469	96.6573	62.8115	158.487	97.6202	60.8671
18	PreDox2	168.399	105.863	62.5354	160.319	99.3114	61.008
18	PreDox2	165.969	98.2516	67.7174	159.036	96.1948	62.8413
18	PreDox2	150.804	98.2603	52.5437	158.571	98.0615	60.5095
18	PreDox2	171.042	87.4648	83.5767	158.107	97.4838	60.623
18	PreDox2	172.002	101.835	70.1671	158.405	93.8183	64.5863
18	PreDox2	161.357	94.3128	67.0445	156.47	95.0763	61.3941
18	PreDox2	161.861	93.783	68.0785	159.182	95.614	63.568
18	PreDox2	165.399	96.0976	69.301	159.07	94.8947	64.1758
1	Dox2Day3	161.001	92.2373	68.7638	145.242	81.0438	64.1978
1	Dox2Day3	154.315	91.8798	62.4352	147.609	79.9815	67.6277
1	Dox2Day3	154.305	93.26	61.0449	147.479	81.4923	65.9866
1	Dox2Day3	150.905	100.302	50.6029	147.64	79.3414	68.2987
1	Dox2Day3	153.887	93.7245	60.162	148.46	80.9338	67.526
1	Dox2Day3	151.151	98.4913	52.6601	144.457	84.3849	60.0725
2	Dox2Day3	160.053	97.0365	63.0161	137.862	80.5882	57.2734
2	Dox2Day3	156.346	93.3304	63.0153	138.781	80.2444	58.5368
2	Dox2Day3	153.393	93.6691	59.7234	143.767	81.6368	62.1305
2	Dox2Day3	162.893	113.978	48.9153	135.148	85.1944	49.9538
2	Dox2Day3	164.518	115.655	48.8631	138.475	82.5945	55.8804
2	Dox2Day3	160.435	97.1219	63.3131	134.718	81.3936	53.3244
7	Dox2Day3	156.215	109.209	47.0054	153.217	87.1118	66.1051
7	Dox2Day3	161.276	94.1001	67.1761	146.959	85.835	61.1243
7	Dox2Day3	157.576	99.3833	58.1922	151.641	87.3591	64.282
7	Dox2Day3	152.794	91.7185	61.075	154.711	87.6157	67.0955
7	Dox2Day3	163.268	99.0989	64.1693	146.708	86.6474	60.0608
7	Dox2Day3	170.074	96.5109	73.5627	149.022	85.618	63.404
8	Dox2Day3	160.274	90.9075	69.3661	154.367	79.5305	74.8367
8	Dox2Day3	159.073	95.2965	63.7769	146.282	79.6792	66.6026
8	Dox2Day3	149.969	87.9288	62.0399	149.651	82.4711	67.1802
8	Dox2Day3	154.813	94.5942	60.2191	149.733	78.9132	70.8197
8	Dox2Day3	142.002	91.4399	50.5626	143.878	81.3909	62.4867
8	Dox2Day3	164.386	106.943	57.4427	147.36	82.9948	64.365
9	Dox2Day3	164.706	89.0183	75.6873	152.557	91.2101	61.3473
9	Dox2Day3	145.13	99.9792	45.1511	151.414	90.7724	60.6419
9	Dox2Day3	139.669	96.1833	43.4852	144.134	90.1227	54.0109
10	Dox2Day3	163.081	90.4218	72.6593	154.282	87.1423	67.1393
10	Dox2Day3	154.072	101.049	53.0229	149.059	85.0781	63.9812
10	Dox2Day3	158.499	110.912	47.5864	137.831	94.9609	42.87
10	Dox2Day3	166.157	108.602	57.5555	137.033	96.1237	40.9093
10	Dox2Day3	148.758	102.965	45.793	138.858	95.7609	43.0971
12	Dox2Day3	161.603	95.4316	66.1714	141.863	90.6861	51.1768
12	Dox2Day3	158.381	92.858	65.523	145.967	90.0149	55.952
12	Dox2Day3	167.386	105.93	61.4565	150.013	87.6234	62.3892
12	Dox2Day3	169.949	97.1465	72.803	150.596	89.4498	61.1462
12	Dox2Day3	162.127	88.424	73.7032	148.637	90.624	58.0131
12	Dox2Day3	162.486	110.29	52.196	143.778	88.6651	55.1126
12	Dox2Day3	161.131	96.1226	65.0079	140.441	88.9625	51.4783
12	Dox2Day3	164.212	104.711	59.5006	145.714	88.8041	56.9102
12	Dox2Day3	161.021	110.381	50.6405	147.492	87.7656	59.7263
12	Dox2Day3	160.053	110.595	49.4575	143.076	92.5151	50.5604
12	Dox2Day3	162.632	101.949	60.6835	153.983	89.5294	64.4533
12	Dox2Day3	147.591	109.444	38.1467	145.048	89.5205	55.5271
12	Dox2Day3	172.332	98.231	74.1009	145.662	89.369	56.2934
12	Dox2Day3	152.621	103.335	49.2857	139.396	88.2784	51.118
13	Dox2Day3	177.994	97.5118	80.4826	154.98	90.5862	64.3938
13	Dox2Day3	167.442	105.467	61.9752	151.052	88.0242	63.0277
13	Dox2Day3	169.489	96.3344	73.1548	149.307	89.544	59.7628
13	Dox2Day3	170.1	100.861	69.2393	152.372	88.9552	63.4171
13	Dox2Day3	177.48	106.119	71.3616	151.491	90.8626	60.6284
13	Dox2Day3	172.817	117.182	55.6355	151.208	90.8575	60.3506
13	Dox2Day3	170.779	107.833	62.9466	151.682	88.8352	62.8463
13	Dox2Day3	167.39	107.691	59.6987	150.782	89.1997	61.5823
13	Dox2Day3	167.795	109.273	58.5221	145.082	92.4343	52.6473
13	Dox2Day3	174.849	115.218	59.6307	152.659	89.0967	63.5624
13	Dox2Day3	175.447	109.309	66.1383	148.986	90.8646	58.1217
13	Dox2Day3	171.115	102.99	68.1252	147.249	86.7696	60.4792
13	Dox2Day3	171.649	99.791	71.8577	149.201	90.6164	58.5845
13	Dox2Day3	168.119	105.918	62.2013	151.842	93.6599	58.1816
14	Dox2Day3	155.446	106.831	48.6147	145.17	86.9612	58.2093
14	Dox2Day3	175.614	110.365	65.2491	146.884	87.9613	58.9227
14	Dox2Day3	175.849	96.7276	79.1215	150.79	86.0517	64.7382
14	Dox2Day3	171.742	102.503	69.2387	145.85	84.5293	61.3204
14	Dox2Day3	177.011	113.021	63.9905	140.948	88.7133	52.2349
14	Dox2Day3	164.232	114.775	49.4572	145.997	84.7326	61.2642
14	Dox2Day3	168.992	102.958	66.0341	149.885	91.8913	57.9941
14	Dox2Day3	173.494	106.709	66.7847	152.002	85.7289	66.2729
14	Dox2Day3	173.499	107.444	66.0545	154.683	85.9935	68.6899
15	Dox2Day3	153.587	91.706	61.8811	144.805	87.5636	57.2418
15	Dox2Day3	151.629	101.023	50.6063	149.728	86.6189	63.1089
15	Dox2Day3	156.806	96.3725	60.4335	146.801	86.1518	60.6495
15	Dox2Day3	148.801	97.7595	51.0419	141.005	86.7123	54.2928
15	Dox2Day3	137.113	98.5353	38.5777	148.424	88.9328	59.4915
15	Dox2Day3	167.571	106.286	61.2847	154.141	86.5283	67.6127
15	Dox2Day3	163.227	103.299	59.928	145.171	89.3545	55.8168
15	Dox2Day3	168.495	83.3868	85.1086	140.908	88.2123	52.696
15	Dox2Day3	156.465	101.497	54.9685	140.035	89.7765	50.2583
16	Dox2Day3	176.172	107.694	68.4784	146.628	83.5567	63.0715
16	Dox2Day3	172.594	108.785	63.8095	149.6	85.9706	63.6292
16	Dox2Day3	169.915	109.429	60.4863	152.209	85.1798	67.0292
16	Dox2Day3	170.088	105.454	64.6337	144.973	83.315	61.6577
16	Dox2Day3	163.769	99.3918	64.3775	151.345	87.4667	63.8783
17	Dox2Day3	159.296	94.537	64.7588	154.033	88.3217	65.7109
17	Dox2Day3	159.008	97.2643	61.744	154.506	87.8035	66.7023
17	Dox2Day3	166.557	97.2434	69.3131	153.163	84.3193	68.8433
17	Dox2Day3	147.473	102.568	44.9054	159.436	83.9317	75.5042
17	Dox2Day3	168.156	95.4777	72.6783	157.412	87.7431	69.6687
17	Dox2Day3	174.972	103.474	71.4981	147.254	88.6546	58.5993
17	Dox2Day3	166.7	101.605	65.0952	143.686	86.707	56.9787
17	Dox2Day3	168.886	105.511	63.3746	148.732	89.1784	59.5541
17	Dox2Day3	168.907	100.156	68.7509	148.767	88.3306	60.4363
17	Dox2Day3	162.98	104.304	58.6754	148.749	87.0262	61.723
18	Dox2Day3	155.912	100.418	55.4939	163.328	93.4238	69.9039
18	Dox2Day3	157.408	102.534	54.8738	162.918	91.3047	71.6135
18	Dox2Day3	149.968	97.9931	51.975	158.634	94.0063	64.628
18	Dox2Day3	156.911	92.9523	63.9582	164.24	89.5837	74.6563
18	Dox2Day3	151.02	93.2999	57.7196	163.511	89.8823	73.6286
18	Dox2Day3	155.862	93.3178	62.5437	157.156	92.522	64.6337
18	Dox2Day3	140.783	97.1776	43.6057	160.231	91.0738	69.1569
18	Dox2Day3	151.037	91.7076	59.3291	161.689	92.2437	69.4456
18	Dox2Day3	158.886	109.421	49.4653	162.731	93.725	69.0064
18	Dox2Day3	157.06	90.8346	66.2251	157.619	90.0073	67.6115
18	Dox2Day3	159.591	100.099	59.4918	158.294	90.2021	68.0921
18	Dox2Day3	151.28	94.3186	56.9611	161.034	93.0413	67.9928
18	Dox2Day3	163.835	85.7283	78.1065	158.283	99.6867	58.5964
18	Dox2Day3	155.029	101.442	53.5871	151.758	91.0962	60.6618
1	Dox2Day5	142.569	94.7765	47.7928	157.266	91.5808	65.685
1	Dox2Day5	146.29	98.5465	47.7438	155.282	91.2392	64.0429
1	Dox2Day5	146.234	103.983	42.2507	155.35	87.7726	67.5773
1	Dox2Day5	142.152	100.356	41.7963	155.828	95.2287	60.5993
1	Dox2Day5	148.629	99.0438	49.5848	147.085	87.113	59.9723
1	Dox2Day5	146.802	100.232	46.5695	151.641	86.9642	64.6767
1	Dox2Day5	143.769	97.6825	46.0861	152.898	90.1867	62.7115
2	Dox2Day5	166.9	112.812	54.0884	134.334	82.3725	51.9615
2	Dox2Day5	167.951	107.048	60.9029	138.499	81.3048	57.1938
2	Dox2Day5	177.164	109.978	67.1858	142.78	82.6623	60.1173
2	Dox2Day5	166.599	98.2427	68.356	137.649	84.6475	53.001
2	Dox2Day5	166.776	113.642	53.1341	139.338	83.6654	55.6728
2	Dox2Day5	155.575	109.393	46.1812	136.694	81.4228	55.271
7	Dox2Day5	148.969	107.497	41.4719	157.41	87.4393	69.9712
7	Dox2Day5	147.847	98.3312	49.516	157.482	89.5021	67.9803
7	Dox2Day5	151.13	101.746	49.3839	152.314	86.4971	65.8173
7	Dox2Day5	154.513	110.783	43.7295	154.778	87.7121	67.0661
7	Dox2Day5	153.191	108.744	44.4466	155.582	82.5799	73.0018
7	Dox2Day5	149.743	97.6716	52.0718	153.686	85.5733	68.113
8	Dox2Day5	155.205	96.8645	58.3404	152.042	84.1321	67.91
8	Dox2Day5	145.814	110.077	35.7373	149.954	84.7257	65.2287
8	Dox2Day5	148.937	103.58	45.3575	150.913	86.0269	64.8857
8	Dox2Day5	158.928	105.585	53.3429	143.726	86.2945	57.4314
8	Dox2Day5	152.143	105.702	46.4405	149.038	83.057	65.9809
9	Dox2Day5	161.989	115.505	46.4841	153.532	87.9919	65.5403
9	Dox2Day5	151.331	109.453	41.8779	149.162	86.4454	62.7165
9	Dox2Day5	144.878	97.801	47.0774	157.309	90.1613	67.1475
9	Dox2Day5	145.157	106.512	38.6442	147.063	94.2635	52.7999
9	Dox2Day5	146.691	118.613	28.0779	135.184	98.2811	36.9029
9	Dox2Day5	139.858	112.174	27.6832	134.208	100.038	34.1698
10	Dox2Day5	164.427	114.563	49.8649	136.741	89.975	46.7663
10	Dox2Day5	162.25	116.235	46.0152	134.581	91.6274	42.9539
10	Dox2Day5	158.986	107.631	51.3556	137.163	95.042	42.1211
10	Dox2Day5	154.383	109.782	44.6013	139.466	90.5498	48.9162
10	Dox2Day5	161.937	108.803	53.1334	139.518	90.012	49.5058
10	Dox2Day5	156.855	108.234	48.6213	132.117	92.0459	40.0709
12	Dox2Day5	161.23	106.367	54.8623	141.842	85.1987	56.6429
12	Dox2Day5	154.621	111.488	43.1331	147.223	84.7473	62.4756
12	Dox2Day5	170.163	107.351	62.8118	137.946	88.3925	49.554
12	Dox2Day5	155.149	107.069	48.0793	136.882	84.1882	52.6934
12	Dox2Day5	164.197	96.6114	67.5859	134.009	89.1604	44.8483
12	Dox2Day5	157.006	95.8465	61.1598	138.186	90.0291	48.1568
12	Dox2Day5	162.052	98.6209	63.431	134.509	88.6945	45.8141
12	Dox2Day5	162.144	106.324	55.8193	137.292	98.9874	38.3041
12	Dox2Day5	161.717	101.326	60.3918	130.839	85.9813	44.858
12	Dox2Day5	160.268	106.568	53.6996	136.489	82.2161	54.2731
12	Dox2Day5	161.04	99.0722	61.9674	138.814	82.7515	56.0629
12	Dox2Day5	165.068	115.162	49.9062	140.136	88.7355	51.4006
12	Dox2Day5	161.586	97.7065	63.8795	138.609	88.3961	50.2131
12	Dox2Day5	167.775	86.6906	81.0848	137.616	87.7447	49.8715
13	Dox2Day5	158.58	102.7	55.8795	158.115	87.4602	70.6551
13	Dox2Day5	154.301	95.9011	58.4002	157.33	87.9211	69.4086
13	Dox2Day5	164.232	113.158	51.0739	151.261	89.2787	61.9825
13	Dox2Day5	165.376	94.263	71.1129	151.978	88.5512	63.4263
13	Dox2Day5	158.344	99.2533	59.0907	151.81	88.5682	63.2419
13	Dox2Day5	167.339	103.611	63.728	155.527	90.702	64.8246
13	Dox2Day5	158.129	107.651	50.4775	156.03	88.956	67.0738
13	Dox2Day5	159.163	110.187	48.9767	146.284	91.0402	55.2442
13	Dox2Day5	159.332	110.99	48.3427	153.558	95.0286	58.5293
13	Dox2Day5	160.147	106.837	53.3092	150.319	93.1852	57.1333
13	Dox2Day5	158.906	107.133	51.7722	146.747	93.2997	53.4475
13	Dox2Day5	148.608	109.138	39.4698	142.474	93.3599	49.114
13	Dox2Day5	148.436	106.774	41.6618	147.848	97.9775	49.8709
13	Dox2Day5	161.122	98.6637	62.4582	153.097	90.1213	62.9755
13	Dox2Day5	162.462	110.071	52.3915	154.366	89.4105	64.9558
13	Dox2Day5	151.567	102.591	48.9756	148.981	96.2897	52.691
14	Dox2Day5	162.385	104.93	57.4548	148.192	82.1662	66.0254
14	Dox2Day5	173.811	105.411	68.4002	146.02	79.948	66.0722
14	Dox2Day5	163.499	93.6198	69.8787	142.867	84.8021	58.0647
14	Dox2Day5	167.994	101.468	66.5258	141.628	84.97	56.6584
14	Dox2Day5	162.671	100.582	62.0885	153.896	90.5707	63.3257
14	Dox2Day5	152.66	107.611	45.0492	150.333	86.232	64.101
14	Dox2Day5	159.899	112.025	47.874	147.407	81.7762	65.6312
14	Dox2Day5	166.273	87.5783	78.695	142.847	86.7244	56.1225
14	Dox2Day5	174.733	98.7333	75.9995	137.002	84.8977	52.1046
14	Dox2Day5	168.491	99.2161	69.2746	139.436	85.4605	53.9759
14	Dox2Day5	176.786	96.3166	80.4694	140.827	85.4583	55.3685
14	Dox2Day5	172.63	111.86	60.7703	141.529	84.2756	57.253
14	Dox2Day5	154.803	103.73	51.0724	143.835	89.7658	54.0688
15	Dox2Day5	151.612	98.7199	52.8926	149.739	83.5544	66.1842
15	Dox2Day5	162.831	98.747	64.0842	146.325	78.4571	67.8674
15	Dox2Day5	155.482	104.158	51.3247	145.619	89.2077	56.4113
15	Dox2Day5	166.481	88.1605	78.3209	143.663	83.2746	60.3885
15	Dox2Day5	160.281	95.6353	64.6462	134.856	91.5956	43.26
15	Dox2Day5	150.479	102.142	48.3362	136.483	89.0198	47.4631
15	Dox2Day5	165.579	101.431	64.1478	131.429	86.5738	44.855
15	Dox2Day5	165.422	107.417	58.0051	140.585	87.4709	53.114
15	Dox2Day5	163.723	115.295	48.4277	137.873	88.714	49.1587
15	Dox2Day5	162.962	98.1321	64.8297	136.122	86.099	50.0227
15	Dox2Day5	162.576	93.4166	69.1595	133.747	89.1339	44.6129
15	Dox2Day5	150.922	98.4303	52.4916	151.492	85.76	65.7322
15	Dox2Day5	162.353	91.5121	70.8408	146.238	84.6932	61.5444
15	Dox2Day5	169.182	96.4956	72.6864	152.222	85.1227	67.099
16	Dox2Day5	163.255	84.6758	78.5793	147.917	83.4577	64.4591
16	Dox2Day5	166.194	109.514	56.6796	145.702	83.3452	62.3571
16	Dox2Day5	164.942	101.766	63.1761	142.491	82.543	59.9476
16	Dox2Day5	168.273	113.256	55.017	144.34	84.8231	59.517
16	Dox2Day5	165.138	109.44	55.698	150.662	85.9488	64.7127
16	Dox2Day5	157.536	79.1484	78.3874	151.962	84.0096	67.9524
16	Dox2Day5	169.508	101.184	68.3233	141.478	83.3782	58.0999
16	Dox2Day5	155.541	104.969	50.5721	140.574	87.0937	53.4802
16	Dox2Day5	166.397	101.392	65.005	145.72	84.5852	61.1352
16	Dox2Day5	154.172	114.943	39.2295	149.747	81.6447	68.1028
16	Dox2Day5	164.488	93.4328	71.0554	147.373	83.2142	64.1584
17	Dox2Day5	158.73	105.665	53.0658	155.004	84.5469	70.4573
17	Dox2Day5	153.758	97.1343	56.6241	151.623	82.9824	68.6407
17	Dox2Day5	158.226	117.896	40.33	141.075	88.2808	52.7946
17	Dox2Day5	178.699	119.648	59.0511	141.104	84.0873	57.0171
17	Dox2Day5	166.435	102.007	64.4279	146.943	89.2569	57.6858
17	Dox2Day5	169.146	112.218	56.9275	143.234	90.1396	53.0947
17	Dox2Day5	166.904	107.7	59.2037	150.588	85.7564	64.832
17	Dox2Day5	163.938	94.9074	69.0304	146.997	87.9531	59.0439
17	Dox2Day5	166.865	107.653	59.2124	152.948	91.7925	61.1551
17	Dox2Day5	166.62	112.12	54.4997	152.084	88.8189	63.2651
17	Dox2Day5	170.059	92.6894	77.3698	148.097	87.5212	60.5754
17	Dox2Day5	168.955	113.783	55.1716	147.467	84.9195	62.5479
17	Dox2Day5	163.904	110.041	53.8627	143.159	85.1	58.0587
18	Dox2Day5	155.429	103.111	52.3186	162.826	92.1233	70.7027
18	Dox2Day5	151.551	100.536	51.0149	162.991	90.9825	72.0084
18	Dox2Day5	149.039	94.84	54.1993	163.237	91.099	72.1376
18	Dox2Day5	149.628	101.882	47.7457	161.012	95.3238	65.6884
18	Dox2Day5	142.537	96.4153	46.1213	156.893	95.1598	61.7335
18	Dox2Day5	152.081	96.885	55.1956	150.267	90.3937	59.8733
18	Dox2Day5	149.096	87.8823	61.2137	160.822	87.1147	73.7076
18	Dox2Day5	155.121	93.5415	61.5794	157.195	94.5451	62.6498
18	Dox2Day5	161.264	97.7794	63.4846	156.854	91.2049	65.6492
18	Dox2Day5	162.409	104.685	57.7242	148.083	101.466	46.6171
18	Dox2Day5	160.484	97.3737	63.1104	147.105	92.6468	54.4583
18	Dox2Day5	151.448	77.1985	74.2492	156.842	92.6701	64.1718

## Sheet: AvgData
Time_ID	Animal_ID	Avg_HAT_peak	Avg_HAT_trough	Avg_HAT_excursion	Avg_IHA_peak	Avg_IHA_trough	Avg_IHA_excursion
Baseline	1	168.484	99.6053	68.8787	146.788	91.9238	54.8644
Baseline	2	155.818	93.1385	62.6792	142.441	89.3915	53.0493
Baseline	7	167.849	101.211	66.638	146.292	93.8507	52.4418
Baseline	8	166.483	100.351	66.1314	141.71	83.5501	58.1594
Baseline	9	148.614	97.3341	51.2799	155.705	98.3142	57.3904
Baseline	10	161.306	102.485	58.8213	141.453	89.2966	52.156
Baseline	12	160.134	103.324	56.8092	143.776	91.5776	52.1984
Baseline	13	159.777	92.1596	67.6178	164.491	99.366	65.1253
Baseline	14	156.693	97.035	59.6582	157.092	94.4047	62.6876
Baseline	15	158.958	96.8583	62.0995	153.656	91.3988	62.2568
Baseline	16	166.603	100.267	66.3356	152.57	90.4621	62.1078
Baseline	17	153.361	98.6845	54.6764	155.279	87.5916	67.6877
Baseline	18	162.655	101.376	61.2798	158.143	101.459	56.6839
PreDox1	1	156.715	100.419	56.2965	151.429	86.3262	65.1025
PreDox1	2	168.424	110.395	58.0293	121.437	74.1734	47.2638
PreDox1	7	155.422	101.869	53.5537	156.649	88.368	68.2811
PreDox1	8	160.99	109.838	51.1518	152.07	89.1851	62.8854
PreDox1	9	163.725	105.627	58.0974	146.726	90.5664	56.1592
PreDox1	10	155.375	98.2396	57.135	157.238	93.2256	64.0123
PreDox1	12	156.838	107.17	49.6678	149.313	91.3602	57.9532
PreDox1	13	150.561	93.7314	56.8299	161.836	100.388	61.4481
PreDox1	14	159.725	99.3814	60.3436	154.923	87.9003	67.0225
PreDox1	15	160.421	98.8485	61.573	148.613	83.1913	65.4215
PreDox1	16	165.438	107.782	57.6558	147.279	85.5658	61.7127
PreDox1	17	146.722	96.1291	50.5929	151.915	88.486	63.4292
PreDox1	18	147.986	93.0245	54.9616	155.397	93.6834	61.7134
Dox1Day3	1	173.582	107.065	66.5168	141.913	83.3613	58.5515
Dox1Day3	2	174.532	106.477	68.0555	129.655	78.268	51.3873
Dox1Day3	7	164.192	107.003	57.1895	150.478	92.9966	57.4814
Dox1Day3	8	169.284	104.561	64.7226	145.433	85.085	60.3484
Dox1Day3	9	165.796	109.752	56.0442	146.394	97.8338	48.5606
Dox1Day3	10	162.021	106.128	55.8937	141.213	89.8829	51.3305
Dox1Day3	12	153.013	99.5449	53.468	147.455	88.3218	59.1331
Dox1Day3	13	149.246	89.5091	59.7371	160.13	92.5634	67.5663
Dox1Day3	14	159.262	95.9816	63.2802	151.544	90.2493	61.2944
Dox1Day3	15	156.99	94.6296	62.3601	143.964	75.8145	68.1495
Dox1Day3	16	156.724	95.6615	61.0629	151.703	91.6653	60.0375
Dox1Day3	17	163.804	91.3706	72.4335	146.956	87.9256	59.0307
Dox1Day3	18	161.177	102.913	58.2633	152.087	91.3896	60.6969
Dox1Day5	1	146.954	99.5051	47.4492	151.844	84.7568	67.0873
Dox1Day5	2	150.323	96.97	53.3526	139.974	79.801	60.1727
Dox1Day5	7	160.013	109.666	50.3472	146.825	84.6742	62.1512
Dox1Day5	8	160.329	101.998	58.3309	151.547	85.6648	65.8824
Dox1Day5	9	162.631	101.807	60.8233	151.882	91.3211	60.5611
Dox1Day5	10	155.266	96.8624	58.4031	157.152	95.5897	61.5626
Dox1Day5	12	154.396	102.455	51.9404	146.635	85.9804	60.6546
Dox1Day5	13	150.331	93.0681	57.2629	152.971	88.0026	64.9684
Dox1Day5	14	165.339	105.265	60.0737	150.608	86.6307	63.9774
Dox1Day5	15	163.662	103.897	59.7651	143.768	86.3215	57.4469
Dox1Day5	16	160.81	107.147	53.663	150.055	85.4697	64.5852
Dox1Day5	17	161.416	102.316	59.1	149.359	86.9628	62.3959
Dox1Day5	18	149.301	102.487	46.8143	160.178	92.5276	67.6507
Dox1Day8	1	154.648	93.4247	61.2235	146.124	85.7018	60.4223
Dox1Day8	2	162.485	101.994	60.4912	134.024	80.4206	53.6033
Dox1Day8	7	161.961	102.062	59.8992	152.752	88.0262	64.726
Dox1Day8	8	154.211	94.3222	59.8885	145.968	83.2382	62.7295
Dox1Day8	9	149.721	104.39	45.331	147.042	95.3561	51.6863
Dox1Day8	10	158.159	104.315	53.8446	154.983	89.5102	65.4728
Dox1Day8	12	153.587	91.9361	61.6505	151.884	91.5426	60.3419
Dox1Day8	13	143.824	93.9596	49.8648	163.098	94.3395	68.7583
Dox1Day8	14	156.623	100.732	55.8916	153.164	89.8316	63.3324
Dox1Day8	15	152.969	104.379	48.59	141.763	88.6448	53.1182
Dox1Day8	16	166.196	103.927	62.2688	141.865	87.2557	54.6095
Dox1Day8	17	161.709	93.2348	68.4744	147.189	86.6808	60.508
Dox1Day8	18	153.01	96.1974	56.8127	155.345	91.3073	64.0374
DoxOff	1	155.064	107.937	47.1278	146.188	81.4787	64.7095
DoxOff	2	164.076	101.247	62.8291	138.172	79.6663	58.5059
DoxOff	7	152.948	100.778	52.1696	161.809	96.9431	64.8664
DoxOff	8	156.95	90.7914	66.1588	152.716	83.7974	68.919
DoxOff	9	157.734	86.1878	71.5458	152.712	90.0805	62.6316
DoxOff	10	161.261	97.1062	64.1552	152.005	90.2226	61.7824
DoxOff	12	151.874	105.583	46.2915	148.671	86.6735	61.9975
DoxOff	13	154.402	99.3906	55.0115	159.749	94.1368	65.612
DoxOff	14	161.944	105.627	56.3173	150.913	86.6539	64.2594
DoxOff	15	158.684	96.8515	61.832	147.84	83.3874	64.4529
DoxOff	16	161.417	106.24	55.1762	153.827	87.7253	66.1019
DoxOff	17	160.195	99.4281	60.7668	148.936	89.5578	59.3782
DoxOff	18	154.55	100.525	54.0252	157.183	92.2981	64.8848
SugarCon	1	(n/a)	(n/a)	(n/a)	(n/a)	(n/a)	(n/a)
SugarCon	2	(n/a)	(n/a)	(n/a)	(n/a)	(n/a)	(n/a)
SugarCon	7	(n/a)	(n/a)	(n/a)	(n/a)	(n/a)	(n/a)
SugarCon	8	(n/a)	(n/a)	(n/a)	(n/a)	(n/a)	(n/a)
SugarCon	9	(n/a)	(n/a)	(n/a)	(n/a)	(n/a)	(n/a)
SugarCon	10	(n/a)	(n/a)	(n/a)	(n/a)	(n/a)	(n/a)
SugarCon	12	154.264	101.994	52.2695	145.306	86.4386	58.8679
SugarCon	13	151.606	101.864	49.7416	156.841	93.8899	62.9512
SugarCon	14	165.906	101.19	64.7156	144.872	85.2273	59.645
SugarCon	15	168.028	105.267	62.7609	150.675	87.2781	63.3966
SugarCon	16	164.745	109.425	55.3203	149.257	86.2733	62.9833
SugarCon	17	166.676	105.461	61.2146	148.951	89.632	59.3195
SugarCon	18	155.73	96.743	58.9869	157.769	94.7657	63.0032
PreDox2	1	141.521	97.3251	44.1957	148.441	83.6676	64.7733
PreDox2	2	155.638	105.411	50.227	135.454	79.1142	56.3395
PreDox2	7	154.669	100.475	54.1942	163.119	90.6867	72.4322
PreDox2	8	162.401	112.777	49.6239	148.482	82.6568	65.8253
PreDox2	9	153.654	101.675	51.979	150.06	92.0123	58.048
PreDox2	10	149.366	103.296	46.0697	149.936	91.6287	58.3069
PreDox2	12	159.716	101.884	57.8317	141.134	87.0748	54.0591
PreDox2	13	157.39	101.722	55.6681	158.823	93.5965	65.2265
PreDox2	14	159.833	96.4713	63.3617	150.82	88.3636	62.4568
PreDox2	15	164.492	90.5611	73.9311	151.784	87.0119	64.7726
PreDox2	16	166.828	109.173	57.6548	152.507	85.6525	66.8546
PreDox2	17	166.133	99.9945	66.1388	145.087	87.6233	57.4632
PreDox2	18	163.595	95.187	68.4083	158.107	96.0638	62.0433
Dox2Day3	1	154.261	94.9825	59.2782	146.815	81.1963	65.6182
Dox2Day3	2	159.606	101.798	57.8077	138.125	81.942	56.1832
Dox2Day3	7	160.2	98.3369	61.8635	150.376	86.6978	63.6786
Dox2Day3	8	155.086	94.5184	60.5679	148.545	80.8299	67.7152
Dox2Day3	9	149.835	95.0603	54.7745	149.368	90.7017	58.6667
Dox2Day3	10	158.113	102.79	55.3234	143.413	91.8132	51.5994
Dox2Day3	12	161.374	102.039	59.3349	144.951	89.3583	55.5932
Dox2Day3	13	171.605	105.821	65.7835	150.564	90.0219	60.5418
Dox2Day3	14	170.653	106.815	63.8383	148.023	86.9515	61.0718
Dox2Day3	15	153.271	95.7543	57.5168	144.995	87.7637	57.2314
Dox2Day3	16	170.508	106.151	64.3571	148.951	85.0977	63.8532
Dox2Day3	17	164.293	100.214	64.0794	151.266	87.4831	63.7833
Dox2Day3	18	155.725	97.6722	58.0532	158.603	92.5461	66.0573
Dox2Day5	1	145.206	99.2315	45.9749	153.621	90.0122	63.6093
Dox2Day5	2	166.827	108.519	58.3081	138.215	82.6792	55.5363
Dox2Day5	7	149.768	102.592	47.1754	155.209	86.5506	68.6583
Dox2Day5	8	152.205	104.362	47.8437	149.667	84.6263	65.0404
Dox2Day5	9	148.317	110.01	38.3074	146.076	92.8635	53.2128
Dox2Day5	10	159.806	110.874	48.932	136.598	91.542	45.0557
Dox2Day5	12	161.715	102.586	59.1294	137.885	87.5159	50.3692
Dox2Day5	13	158.503	104.933	53.57	151.608	91.3219	60.2859
Dox2Day5	14	165.895	101.776	64.1194	144.294	85.1575	59.1363
Dox2Day5	15	160.706	99.2637	61.4424	141.185	86.0229	55.1618
Dox2Day5	16	163.222	101.247	61.9748	146.179	84.004	62.1748
Dox2Day5	17	165.557	107.189	58.3675	147.717	87.012	60.7052
Dox2Day5	18	153.341	96.0108	57.3297	157.011	92.8942	64.1165
