# Supplementary material for: Long ascending propriospinal neurons provide flexible, context-specific control of interlimb coordination
Source: eLife. 2020 Sep 9;9:e53565. doi: 10.7554/eLife.53565 (PMC7527236; doi:10.7554/eLife.53565)
Supplement: Figure 3—source data 3. [file elife-53565-fig3-data3.xlsx]

## Sheet: RawData
Animal_ID	Time_ID	LHL_HAT-IHA (º)		Animal_ID	Time_ID	RHL_HAT-IHA (º)
1	Baseline	305.455		1	Baseline	328.235
1	Baseline	298.286		1	Baseline	340
1	Baseline	349.091		1	Baseline	326.512
1	Baseline	338.182		1	Baseline	325.161
1	Baseline	310		1	Baseline	360
1	Baseline	333.333		1	Baseline	360
1	Baseline	347.586		1	Baseline	348.387
1	Baseline	347.586		1	Baseline	360
1	Baseline	325.161		1	Baseline	360
1	Baseline	321.429		2	Baseline	360
1	Baseline	348.75		2	Baseline	360
1	Baseline	360		2	Baseline	334.286
1	Baseline	360		2	Baseline	360
1	Baseline	360		2	Baseline	346.667
1	Baseline	360		7	Baseline	360
1	Baseline	346.667		7	Baseline	360
1	Baseline	360		7	Baseline	330
2	Baseline	310.345		7	Baseline	342.857
2	Baseline	330		7	Baseline	325.714
2	Baseline	348.75		8	Baseline	338.824
2	Baseline	337.5		8	Baseline	349.412
2	Baseline	337.5		8	Baseline	333.333
2	Baseline	360		8	Baseline	332.308
2	Baseline	360		8	Baseline	320
2	Baseline	348		8	Baseline	346.154
2	Baseline	318.857		9	Baseline	347.143
2	Baseline	360		9	Baseline	360
2	Baseline	336		9	Baseline	360
2	Baseline	347.586		9	Baseline	347.143
7	Baseline	348.75		9	Baseline	360
7	Baseline	337.5		9	Baseline	360
7	Baseline	360		9	Baseline	345
7	Baseline	360		9	Baseline	360
7	Baseline	347.586		10	Baseline	360
7	Baseline	328.696		10	Baseline	360
7	Baseline	344.348		10	Baseline	360
7	Baseline	345		10	Baseline	344.348
8	Baseline	345		10	Baseline	344.348
8	Baseline	328.696		10	Baseline	313.043
8	Baseline	348.75		10	Baseline	360
8	Baseline	315		10	Baseline	360
8	Baseline	360		10	Baseline	360
8	Baseline	345.6		10	Baseline	360
8	Baseline	344.348		10	Baseline	345.6
9	Baseline	347.143		12	Baseline	336.774
9	Baseline	360		12	Baseline	333.333
9	Baseline	360		12	Baseline	349.714
9	Baseline	335.455		12	Baseline	345.6
9	Baseline	360		12	Baseline	332.308
9	Baseline	360		13	Baseline	300
9	Baseline	360		13	Baseline	338.182
9	Baseline	349.714		13	Baseline	316.8
9	Baseline	339.429		13	Baseline	318.462
9	Baseline	360		13	Baseline	325.714
9	Baseline	360		13	Baseline	327.273
9	Baseline	346.667		13	Baseline	360
9	Baseline	346.667		13	Baseline	360
10	Baseline	322.759		13	Baseline	360
10	Baseline	334.286		14	Baseline	360
10	Baseline	347.143		14	Baseline	360
10	Baseline	336		14	Baseline	345
10	Baseline	312		15	Baseline	348.387
10	Baseline	345.6		15	Baseline	317.647
10	Baseline	343.636		15	Baseline	344.348
10	Baseline	347.586		15	Baseline	342.857
10	Baseline	322.759		15	Baseline	316.8
10	Baseline	343.636		15	Baseline	332.308
12	Baseline	335.172		15	Baseline	327.273
12	Baseline	336		15	Baseline	324
12	Baseline	360		16	Baseline	360
12	Baseline	360		16	Baseline	345.6
12	Baseline	328.696		16	Baseline	360
12	Baseline	315		16	Baseline	344.348
12	Baseline	312		16	Baseline	313.043
13	Baseline	310.345		16	Baseline	327.273
13	Baseline	337.5		17	Baseline	349.714
13	Baseline	348.75		17	Baseline	329.143
13	Baseline	327.273		18	Baseline	360
13	Baseline	345		18	Baseline	360
13	Baseline	334.286		18	Baseline	333.333
14	Baseline	360		18	Baseline	320
14	Baseline	360		18	Baseline	345.6
14	Baseline	360		1	PreDox1	348
14	Baseline	333.333		1	PreDox1	321.429
14	Baseline	330		1	PreDox1	334.286
14	Baseline	327.273		2	PreDox1	349.412
15	Baseline	345.6		2	PreDox1	336
15	Baseline	324		2	PreDox1	325.161
15	Baseline	336		7	PreDox1	328.235
15	Baseline	322.105		7	PreDox1	317.647
16	Baseline	315		7	PreDox1	360
16	Baseline	320		7	PreDox1	347.143
16	Baseline	333.333		7	PreDox1	333.333
16	Baseline	347.586		7	PreDox1	333.333
16	Baseline	340.541		8	PreDox1	348
16	Baseline	350.27		8	PreDox1	349.091
16	Baseline	342		8	PreDox1	338.182
16	Baseline	328.696		8	PreDox1	346.667
17	Baseline	322.759		9	PreDox1	360
17	Baseline	335.172		9	PreDox1	348.387
17	Baseline	360		9	PreDox1	360
17	Baseline	331.2		9	PreDox1	360
18	Baseline	360		9	PreDox1	360
18	Baseline	336		9	PreDox1	346.154
18	Baseline	324		10	PreDox1	360
18	Baseline	360		10	PreDox1	316.8
18	Baseline	321.429		10	PreDox1	360
1	PreDox1	348.75		10	PreDox1	345.6
1	PreDox1	360		12	PreDox1	333.333
1	PreDox1	360		12	PreDox1	326.25
1	PreDox1	350.27		12	PreDox1	342.439
1	PreDox1	330.811		13	PreDox1	349.412
1	PreDox1	336.774		13	PreDox1	349.412
2	PreDox1	360		13	PreDox1	321.429
2	PreDox1	346.667		14	PreDox1	336
2	PreDox1	360		14	PreDox1	336.774
2	PreDox1	360		14	PreDox1	348.387
2	PreDox1	338.182		14	PreDox1	330
2	PreDox1	334.286		14	PreDox1	345
2	PreDox1	360		15	PreDox1	350.526
2	PreDox1	360		15	PreDox1	350.526
7	PreDox1	360		15	PreDox1	343.636
7	PreDox1	348.387		16	PreDox1	347.586
7	PreDox1	310		16	PreDox1	347.586
7	PreDox1	360		16	PreDox1	310.345
7	PreDox1	346.667		16	PreDox1	360
7	PreDox1	345.6		17	PreDox1	347.586
8	PreDox1	360		17	PreDox1	360
8	PreDox1	349.412		18	PreDox1	360
8	PreDox1	348.387		18	PreDox1	348.387
9	PreDox1	334.286		18	PreDox1	360
9	PreDox1	347.143		18	PreDox1	344.348
9	PreDox1	346.667		18	PreDox1	342.857
9	PreDox1	333.333		1	DoxOff	340
10	PreDox1	360		1	DoxOff	320
10	PreDox1	328.696		1	DoxOff	341.053
10	PreDox1	322.759		2	DoxOff	345.6
10	PreDox1	346.154		2	DoxOff	360
10	PreDox1	360		2	DoxOff	347.143
12	PreDox1	328.696		7	DoxOff	360
12	PreDox1	345		7	DoxOff	340.541
12	PreDox1	344.348		7	DoxOff	349.714
12	PreDox1	325.714		7	DoxOff	360
13	PreDox1	346.154		8	DoxOff	360
13	PreDox1	331.2		8	DoxOff	350.526
13	PreDox1	345.6		8	DoxOff	360
14	PreDox1	326.25		9	DoxOff	344.348
14	PreDox1	332.308		9	DoxOff	346.154
15	PreDox1	348		9	DoxOff	318.462
15	PreDox1	330		9	DoxOff	348
15	PreDox1	327.273		9	DoxOff	360
16	PreDox1	345		10	DoxOff	310.345
16	PreDox1	321.429		10	DoxOff	347.143
16	PreDox1	345		10	DoxOff	316.8
16	PreDox1	315		12	DoxOff	344.348
17	PreDox1	349.091		12	DoxOff	346.667
17	PreDox1	340		13	DoxOff	347.586
17	PreDox1	310		13	DoxOff	360
17	PreDox1	335.172		14	DoxOff	330
17	PreDox1	346.667		14	DoxOff	330
18	PreDox1	343.636		14	DoxOff	360
18	PreDox1	333.333		15	DoxOff	334.286
18	PreDox1	342.857		15	DoxOff	351.429
18	PreDox1	310.909		15	DoxOff	347.143
18	PreDox1	342.857		15	DoxOff	360
18	PreDox1	310.909		16	DoxOff	345.6
1	DoxOff	360		16	DoxOff	360
1	DoxOff	348.387		16	DoxOff	347.143
1	DoxOff	348.387		17	DoxOff	348
1	DoxOff	360		17	DoxOff	335.172
8	DoxOff	360		17	DoxOff	338.182
8	DoxOff	349.412		17	DoxOff	349.714
8	DoxOff	330		17	DoxOff	329.143
8	DoxOff	345.6		17	DoxOff	338.824
9	DoxOff	347.143		18	DoxOff	321.429
9	DoxOff	360		18	DoxOff	348
9	DoxOff	360		12	SugarCon	347.586
9	DoxOff	333.333		13	SugarCon	337.5
9	DoxOff	329.143		13	SugarCon	340
10	DoxOff	329.143		13	SugarCon	360
10	DoxOff	321.429		13	SugarCon	360
10	DoxOff	335.172		13	SugarCon	360
10	DoxOff	360		13	SugarCon	318.857
12	DoxOff	345.6		13	SugarCon	347.143
12	DoxOff	330		13	SugarCon	360
12	DoxOff	347.143		14	SugarCon	346.667
13	DoxOff	328.696		14	SugarCon	315
13	DoxOff	360		14	SugarCon	332.308
13	DoxOff	360		15	SugarCon	348.387
13	DoxOff	360		15	SugarCon	345
14	DoxOff	346.154		15	SugarCon	331.2
14	DoxOff	336		16	SugarCon	322.105
14	DoxOff	332.308		16	SugarCon	313.043
14	DoxOff	318.462		16	SugarCon	342
15	DoxOff	346.154		17	SugarCon	333.333
15	DoxOff	346.154		17	SugarCon	332.308
15	DoxOff	330		18	SugarCon	342.857
15	DoxOff	327.273		18	SugarCon	342.857
15	DoxOff	345		18	SugarCon	342.857
16	DoxOff	340.541		18	SugarCon	342.857
16	DoxOff	350.27		18	SugarCon	360
16	DoxOff	348.387		1	PreDox2	360
16	DoxOff	325.161		1	PreDox2	360
16	DoxOff	346.667		1	PreDox2	360
17	DoxOff	345.6		1	PreDox2	360
17	DoxOff	335.172		2	PreDox2	340.541
17	DoxOff	360		2	PreDox2	336.774
17	DoxOff	331.2		2	PreDox2	360
17	DoxOff	346.154		2	PreDox2	360
17	DoxOff	308.571		2	PreDox2	360
18	DoxOff	320		7	PreDox2	360
18	DoxOff	348.387		7	PreDox2	360
18	DoxOff	328.696		7	PreDox2	360
18	DoxOff	345		7	PreDox2	345.306
12	SugarCon	316.8		7	PreDox2	330.612
12	SugarCon	336		8	PreDox2	360
12	SugarCon	331.2		8	PreDox2	360
12	SugarCon	332.308		8	PreDox2	348
12	SugarCon	347.143		9	PreDox2	332.308
13	SugarCon	325.161		9	PreDox2	345.6
13	SugarCon	346.154		9	PreDox2	325.714
13	SugarCon	360		9	PreDox2	344.348
14	SugarCon	334.286		10	PreDox2	325.714
14	SugarCon	345.6		10	PreDox2	328.696
14	SugarCon	321.429		10	PreDox2	348
14	SugarCon	346.154		10	PreDox2	360
14	SugarCon	346.667		12	PreDox2	347.586
14	SugarCon	312		12	PreDox2	348
15	SugarCon	332.308		12	PreDox2	313.043
15	SugarCon	346.154		12	PreDox2	332.308
15	SugarCon	360		13	PreDox2	360
15	SugarCon	345.6		13	PreDox2	336.774
15	SugarCon	338.182		13	PreDox2	348.387
15	SugarCon	349.091		14	PreDox2	360
16	SugarCon	331.2		14	PreDox2	348.387
16	SugarCon	360		14	PreDox2	318.462
16	SugarCon	344.348		14	PreDox2	346.154
16	SugarCon	346.154		14	PreDox2	360
17	SugarCon	313.043		14	PreDox2	340
17	SugarCon	334.286		15	PreDox2	325.161
17	SugarCon	346.154		15	PreDox2	348
17	SugarCon	346.154		15	PreDox2	322.105
18	SugarCon	327.273		15	PreDox2	336.774
18	SugarCon	330		15	PreDox2	360
18	SugarCon	342.857		15	PreDox2	348.387
18	SugarCon	327.273		15	PreDox2	349.714
18	SugarCon	328.696		15	PreDox2	360
18	SugarCon	345.6		15	PreDox2	346.154
18	SugarCon	333.333		16	PreDox2	348
18	SugarCon	360		16	PreDox2	345.6
1	PreDox2	360		17	PreDox2	332.308
1	PreDox2	335.172		17	PreDox2	322.759
1	PreDox2	338.182		17	PreDox2	360
2	PreDox2	360		17	PreDox2	360
2	PreDox2	360		18	PreDox2	336.774
2	PreDox2	360		18	PreDox2	326.25
2	PreDox2	347.143		18	PreDox2	332.308
2	PreDox2	346.154		18	PreDox2	332.308
7	PreDox2	337.5		18	PreDox2	360
7	PreDox2	348		18	PreDox2	333.333
7	PreDox2	320		18	PreDox2	333.333
7	PreDox2	346.667		18	PreDox2	339.429
8	PreDox2	328.696		18	PreDox2	336.774
8	PreDox2	345		18	PreDox2	335.172
8	PreDox2	348.387		18	PreDox2	320
8	PreDox2	348.387		18	PreDox2	325.714
9	PreDox2	341.053		1	Dox1Day3	336
9	PreDox2	327.273		1	Dox1Day3	348
9	PreDox2	344.348		1	Dox1Day3	360
9	PreDox2	360		1	Dox1Day3	348
10	PreDox2	325.714		2	Dox1Day3	360
10	PreDox2	327.273		2	Dox1Day3	335.172
10	PreDox2	340		2	Dox1Day3	360
10	PreDox2	360		2	Dox1Day3	347.143
10	PreDox2	341.053		2	Dox1Day3	348.387
12	PreDox2	0		7	Dox1Day3	335.172
12	PreDox2	331.2		7	Dox1Day3	335.172
12	PreDox2	336		7	Dox1Day3	347.586
12	PreDox2	348		7	Dox1Day3	360
12	PreDox2	360		7	Dox1Day3	360
13	PreDox2	349.412		7	Dox1Day3	350
13	PreDox2	360		7	Dox1Day3	336.774
13	PreDox2	360		7	Dox1Day3	360
13	PreDox2	332.308		8	Dox1Day3	350.27
13	PreDox2	330		8	Dox1Day3	311.351
13	PreDox2	347.586		8	Dox1Day3	360
13	PreDox2	345.6		8	Dox1Day3	360
13	PreDox2	345		8	Dox1Day3	360
13	PreDox2	360		8	Dox1Day3	360
13	PreDox2	360		8	Dox1Day3	348.75
13	PreDox2	332.308		8	Dox1Day3	348.75
13	PreDox2	330		9	Dox1Day3	360
14	PreDox2	348.387		9	Dox1Day3	360
14	PreDox2	360		9	Dox1Day3	347.143
14	PreDox2	335.172		9	Dox1Day3	336
14	PreDox2	360		9	Dox1Day3	348
14	PreDox2	347.143		9	Dox1Day3	360
15	PreDox2	345.6		9	Dox1Day3	360
15	PreDox2	336		10	Dox1Day3	344.348
16	PreDox2	320		10	Dox1Day3	345
16	PreDox2	347.586		10	Dox1Day3	334.286
16	PreDox2	310.345		10	Dox1Day3	342.857
16	PreDox2	331.2		10	Dox1Day3	318.462
16	PreDox2	332.308		10	Dox1Day3	347.586
16	PreDox2	360		12	Dox1Day3	360
17	PreDox2	338.824		12	Dox1Day3	360
17	PreDox2	349.412		12	Dox1Day3	328.696
17	PreDox2	338.182		13	Dox1Day3	349.412
18	PreDox2	336.774		13	Dox1Day3	328.235
18	PreDox2	360		13	Dox1Day3	333.333
18	PreDox2	334.286		13	Dox1Day3	336
18	PreDox2	347.586		14	Dox1Day3	360
18	PreDox2	344.348		14	Dox1Day3	345
18	PreDox2	308.571		14	Dox1Day3	327.273
18	PreDox2	332.308		15	Dox1Day3	360
18	PreDox2	331.2		15	Dox1Day3	360
18	PreDox2	346.154		15	Dox1Day3	360
1	Dox1Day3	335.172		16	Dox1Day3	345.6
1	Dox1Day3	347.586		16	Dox1Day3	345.6
1	Dox1Day3	349.091		16	Dox1Day3	331.2
1	Dox1Day3	349.091		16	Dox1Day3	345.6
2	Dox1Day3	346.154		16	Dox1Day3	360
2	Dox1Day3	333.333		17	Dox1Day3	347.586
2	Dox1Day3	360		17	Dox1Day3	348
2	Dox1Day3	360		17	Dox1Day3	334.286
2	Dox1Day3	360		18	Dox1Day3	343.636
7	Dox1Day3	333.333		18	Dox1Day3	330
7	Dox1Day3	335.172		18	Dox1Day3	327.273
7	Dox1Day3	360		1	Dox1Day5	348
7	Dox1Day3	347.586		1	Dox1Day5	348
8	Dox1Day3	348		1	Dox1Day5	345.306
8	Dox1Day3	335.172		1	Dox1Day5	360
8	Dox1Day3	351.22		2	Dox1Day5	360
8	Dox1Day3	331.2		2	Dox1Day5	336.774
9	Dox1Day3	331.2		2	Dox1Day5	324
9	Dox1Day3	347.586		2	Dox1Day5	340.541
9	Dox1Day3	335.172		2	Dox1Day5	351.628
9	Dox1Day3	322.759		7	Dox1Day5	348
9	Dox1Day3	346.667		7	Dox1Day5	324
10	Dox1Day3	313.043		7	Dox1Day5	347.586
10	Dox1Day3	300		7	Dox1Day5	360
10	Dox1Day3	328.696		7	Dox1Day5	347.143
10	Dox1Day3	344.348		7	Dox1Day5	340.541
12	Dox1Day3	320		8	Dox1Day5	349.412
12	Dox1Day3	349.412		8	Dox1Day5	348.387
12	Dox1Day3	360		8	Dox1Day5	346.667
12	Dox1Day3	333.333		8	Dox1Day5	346.667
12	Dox1Day3	347.586		8	Dox1Day5	317.647
13	Dox1Day3	334.286		9	Dox1Day5	360
13	Dox1Day3	328.696		9	Dox1Day5	360
14	Dox1Day3	330		10	Dox1Day5	332.308
14	Dox1Day3	304.615		10	Dox1Day5	331.2
14	Dox1Day3	332.308		10	Dox1Day5	321.429
14	Dox1Day3	331.2		12	Dox1Day5	331.2
15	Dox1Day3	342.857		12	Dox1Day5	344.348
15	Dox1Day3	315		12	Dox1Day5	326.25
15	Dox1Day3	331.2		12	Dox1Day5	341.538
15	Dox1Day3	345.6		13	Dox1Day5	360
15	Dox1Day3	345		14	Dox1Day5	336.774
15	Dox1Day3	333.333		14	Dox1Day5	336
15	Dox1Day3	360		14	Dox1Day5	345.6
15	Dox1Day3	341.053		15	Dox1Day5	331.2
15	Dox1Day3	360		15	Dox1Day5	322.105
16	Dox1Day3	325.714		15	Dox1Day5	313.043
16	Dox1Day3	327.273		16	Dox1Day5	360
17	Dox1Day3	332.308		16	Dox1Day5	360
17	Dox1Day3	325.714		16	Dox1Day5	360
17	Dox1Day3	343.636		17	Dox1Day5	348.387
18	Dox1Day3	340		17	Dox1Day5	360
18	Dox1Day3	336		17	Dox1Day5	360
18	Dox1Day3	325.714		17	Dox1Day5	346.667
18	Dox1Day3	360		17	Dox1Day5	333.333
18	Dox1Day3	342		18	Dox1Day5	318.462
1	Dox1Day5	360		1	Dox1Day8	338.182
1	Dox1Day5	360		1	Dox1Day8	351.429
1	Dox1Day5	360		1	Dox1Day8	350.526
1	Dox1Day5	348		1	Dox1Day8	341.053
2	Dox1Day5	333.333		1	Dox1Day8	328
2	Dox1Day5	345		1	Dox1Day8	324
2	Dox1Day5	348		2	Dox1Day8	346.154
2	Dox1Day5	348		2	Dox1Day8	334.286
2	Dox1Day5	349.091		2	Dox1Day8	360
2	Dox1Day5	327.273		2	Dox1Day8	360
7	Dox1Day5	360		7	Dox1Day8	347.143
7	Dox1Day5	334.286		7	Dox1Day8	348.75
7	Dox1Day5	347.143		7	Dox1Day8	360
7	Dox1Day5	336		7	Dox1Day8	360
7	Dox1Day5	346.154		7	Dox1Day8	328.235
7	Dox1Day5	335.172		7	Dox1Day8	348.387
8	Dox1Day5	360		8	Dox1Day8	332.308
8	Dox1Day5	360		8	Dox1Day8	349.412
8	Dox1Day5	360		8	Dox1Day8	349.412
8	Dox1Day5	316.8		9	Dox1Day8	360
8	Dox1Day5	348		9	Dox1Day8	348
8	Dox1Day5	336.774		9	Dox1Day8	348
8	Dox1Day5	350		9	Dox1Day8	360
9	Dox1Day5	336		9	Dox1Day8	360
9	Dox1Day5	332.308		9	Dox1Day8	308.571
9	Dox1Day5	360		10	Dox1Day8	330
10	Dox1Day5	341.053		10	Dox1Day8	360
10	Dox1Day5	304.615		10	Dox1Day8	348
10	Dox1Day5	320		10	Dox1Day8	312
10	Dox1Day5	320		12	Dox1Day8	331.2
12	Dox1Day5	325.714		12	Dox1Day8	349.714
12	Dox1Day5	324		12	Dox1Day8	337.021
12	Dox1Day5	320		13	Dox1Day8	360
13	Dox1Day5	330		13	Dox1Day8	349.091
13	Dox1Day5	345		14	Dox1Day8	331.2
13	Dox1Day5	324		14	Dox1Day8	318.462
14	Dox1Day5	330		14	Dox1Day8	322.759
14	Dox1Day5	345.6		15	Dox1Day8	341.053
14	Dox1Day5	360		15	Dox1Day8	320
14	Dox1Day5	320		15	Dox1Day8	345.6
14	Dox1Day5	333.333		15	Dox1Day8	332.308
15	Dox1Day5	342		15	Dox1Day8	346.154
15	Dox1Day5	320		16	Dox1Day8	328.696
15	Dox1Day5	306		16	Dox1Day8	360
16	Dox1Day5	324		16	Dox1Day8	360
16	Dox1Day5	324		17	Dox1Day8	328.696
17	Dox1Day5	344.348		17	Dox1Day8	331.2
17	Dox1Day5	331.2		17	Dox1Day8	349.412
17	Dox1Day5	360		17	Dox1Day8	322.759
17	Dox1Day5	331.2		17	Dox1Day8	325.161
17	Dox1Day5	313.043		18	Dox1Day8	325.714
18	Dox1Day5	325.714		18	Dox1Day8	308.571
18	Dox1Day5	344.348		18	Dox1Day8	360
18	Dox1Day5	360		1	Dox2Day3	349.091
18	Dox1Day5	315		1	Dox2Day3	360
1	Dox1Day8	339.429		1	Dox2Day3	360
1	Dox1Day8	360		1	Dox2Day3	360
1	Dox1Day8	360		1	Dox2Day3	351
1	Dox1Day8	351.818		1	Dox2Day3	360
1	Dox1Day8	343.256		2	Dox2Day3	336
1	Dox1Day8	326.512		2	Dox2Day3	348.387
2	Dox1Day8	360		2	Dox2Day3	348.387
2	Dox1Day8	346.154		2	Dox2Day3	360
2	Dox1Day8	346.154		2	Dox2Day3	349.714
2	Dox1Day8	347.586		7	Dox2Day3	340
2	Dox1Day8	322.759		7	Dox2Day3	350
7	Dox1Day8	360		7	Dox2Day3	348
7	Dox1Day8	334.286		7	Dox2Day3	346.154
7	Dox1Day8	350.769		8	Dox2Day3	349.091
7	Dox1Day8	338.824		8	Dox2Day3	338.182
7	Dox1Day8	339.429		8	Dox2Day3	335.172
7	Dox1Day8	336.774		8	Dox2Day3	336.774
8	Dox1Day8	330		8	Dox2Day3	347.586
8	Dox1Day8	347.143		9	Dox2Day3	346.154
8	Dox1Day8	348.387		9	Dox2Day3	360
8	Dox1Day8	360		9	Dox2Day3	360
9	Dox1Day8	338.824		10	Dox2Day3	328.696
9	Dox1Day8	343.636		10	Dox2Day3	360
9	Dox1Day8	324		12	Dox2Day3	360
9	Dox1Day8	345.6		12	Dox2Day3	360
10	Dox1Day8	320		12	Dox2Day3	344.348
10	Dox1Day8	324		12	Dox2Day3	332.308
10	Dox1Day8	325.714		12	Dox2Day3	328.696
10	Dox1Day8	306		12	Dox2Day3	344.348
10	Dox1Day8	327.273		12	Dox2Day3	327.273
12	Dox1Day8	324		12	Dox2Day3	346.154
12	Dox1Day8	324		12	Dox2Day3	332.308
12	Dox1Day8	331.2		12	Dox2Day3	342
12	Dox1Day8	331.2		12	Dox2Day3	316.8
12	Dox1Day8	346.154		13	Dox2Day3	347.143
13	Dox1Day8	347.143		13	Dox2Day3	347.143
13	Dox1Day8	332.308		13	Dox2Day3	346.154
13	Dox1Day8	360		13	Dox2Day3	346.154
14	Dox1Day8	346.667		13	Dox2Day3	360
14	Dox1Day8	346.667		13	Dox2Day3	345
14	Dox1Day8	330		13	Dox2Day3	346.154
14	Dox1Day8	344.348		13	Dox2Day3	360
15	Dox1Day8	346.154		13	Dox2Day3	360
15	Dox1Day8	332.308		13	Dox2Day3	347.143
15	Dox1Day8	342.439		14	Dox2Day3	347.143
15	Dox1Day8	332.308		14	Dox2Day3	334.286
15	Dox1Day8	350.27		14	Dox2Day3	336
15	Dox1Day8	321.081		14	Dox2Day3	338.182
15	Dox1Day8	338.824		15	Dox2Day3	330
16	Dox1Day8	315		15	Dox2Day3	360
16	Dox1Day8	345		15	Dox2Day3	360
16	Dox1Day8	335.172		15	Dox2Day3	324
16	Dox1Day8	360		16	Dox2Day3	346.154
16	Dox1Day8	345		16	Dox2Day3	346.667
17	Dox1Day8	331.2		16	Dox2Day3	346.667
17	Dox1Day8	344.348		17	Dox2Day3	327.273
17	Dox1Day8	360		17	Dox2Day3	338.824
17	Dox1Day8	360		17	Dox2Day3	349.412
17	Dox1Day8	344.348		17	Dox2Day3	343.636
17	Dox1Day8	344.348		17	Dox2Day3	331.2
17	Dox1Day8	348		17	Dox2Day3	347.586
17	Dox1Day8	360		17	Dox2Day3	348
18	Dox1Day8	344.348		18	Dox2Day3	346.667
18	Dox1Day8	315		18	Dox2Day3	360
18	Dox1Day8	308.571		18	Dox2Day3	346.154
18	Dox1Day8	340		18	Dox2Day3	313.548
18	Dox1Day8	325.714		18	Dox2Day3	329.143
1	Dox2Day3	346.667		18	Dox2Day3	345.6
1	Dox2Day3	348		1	Dox2Day5	350
2	Dox2Day3	321.429		1	Dox2Day5	352.34
2	Dox2Day3	360		1	Dox2Day5	360
2	Dox2Day3	360		1	Dox2Day5	360
2	Dox2Day3	340.541		1	Dox2Day5	360
2	Dox2Day3	360		1	Dox2Day5	342.857
2	Dox2Day3	360		2	Dox2Day5	347.586
2	Dox2Day3	341.053		2	Dox2Day5	360
7	Dox2Day3	336		2	Dox2Day5	348
7	Dox2Day3	308.571		2	Dox2Day5	348
7	Dox2Day3	316.8		7	Dox2Day5	340
8	Dox2Day3	321.429		7	Dox2Day5	310
8	Dox2Day3	328.696		7	Dox2Day5	323.077
8	Dox2Day3	327.273		7	Dox2Day5	348
8	Dox2Day3	332.308		7	Dox2Day5	348.387
9	Dox2Day3	300		7	Dox2Day5	294.545
9	Dox2Day3	291.429		8	Dox2Day5	347.143
9	Dox2Day3	313.043		8	Dox2Day5	346.667
10	Dox2Day3	288		9	Dox2Day5	343.636
10	Dox2Day3	322.105		9	Dox2Day5	318.462
12	Dox2Day3	346.667		9	Dox2Day5	330
12	Dox2Day3	345		10	Dox2Day5	360
12	Dox2Day3	347.586		10	Dox2Day5	342
12	Dox2Day3	313.043		10	Dox2Day5	322.105
12	Dox2Day3	324		12	Dox2Day5	343.636
12	Dox2Day3	360		12	Dox2Day5	360
12	Dox2Day3	360		12	Dox2Day5	330
13	Dox2Day3	360		12	Dox2Day5	346.667
13	Dox2Day3	340		12	Dox2Day5	330
13	Dox2Day3	337.5		12	Dox2Day5	318.462
13	Dox2Day3	360		12	Dox2Day5	343.636
13	Dox2Day3	349.412		12	Dox2Day5	344.348
13	Dox2Day3	360		12	Dox2Day5	327.273
13	Dox2Day3	360		12	Dox2Day5	345
14	Dox2Day3	308.571		13	Dox2Day5	348
14	Dox2Day3	360		13	Dox2Day5	345
14	Dox2Day3	360		13	Dox2Day5	360
14	Dox2Day3	331.2		13	Dox2Day5	360
14	Dox2Day3	360		13	Dox2Day5	346.154
15	Dox2Day3	288		13	Dox2Day5	347.143
15	Dox2Day3	360		13	Dox2Day5	342.857
15	Dox2Day3	360		13	Dox2Day5	343.636
15	Dox2Day3	360		13	Dox2Day5	343.636
15	Dox2Day3	344.348		13	Dox2Day5	330
16	Dox2Day3	360		14	Dox2Day5	316.8
16	Dox2Day3	347.143		14	Dox2Day5	360
16	Dox2Day3	360		14	Dox2Day5	347.143
16	Dox2Day3	360		14	Dox2Day5	316.8
16	Dox2Day3	360		14	Dox2Day5	360
16	Dox2Day3	360		14	Dox2Day5	322.105
16	Dox2Day3	360		14	Dox2Day5	327.273
16	Dox2Day3	360		14	Dox2Day5	328.696
16	Dox2Day3	360		14	Dox2Day5	334.286
16	Dox2Day3	330		15	Dox2Day5	342
16	Dox2Day3	360		15	Dox2Day5	322.105
17	Dox2Day3	360		15	Dox2Day5	315
17	Dox2Day3	335.172		15	Dox2Day5	317.647
17	Dox2Day3	348		16	Dox2Day5	334.286
17	Dox2Day3	346.667		16	Dox2Day5	308.571
17	Dox2Day3	346.667		16	Dox2Day5	336.774
17	Dox2Day3	360		16	Dox2Day5	315
17	Dox2Day3	360		16	Dox2Day5	346.154
17	Dox2Day3	360		16	Dox2Day5	346.154
17	Dox2Day3	360		17	Dox2Day5	335.172
18	Dox2Day3	331.2		17	Dox2Day5	306
18	Dox2Day3	313.548		17	Dox2Day5	306
18	Dox2Day3	324		17	Dox2Day5	316.8
18	Dox2Day3	334.286		17	Dox2Day5	345
1	Dox2Day5	334.286		17	Dox2Day5	343.636
1	Dox2Day5	348		17	Dox2Day5	332.308
1	Dox2Day5	347.143		17	Dox2Day5	310.909
1	Dox2Day5	347.143		18	Dox2Day5	347.143
2	Dox2Day5	324		18	Dox2Day5	348
2	Dox2Day5	360		18	Dox2Day5	342.857
2	Dox2Day5	347.586		18	Dox2Day5	340
2	Dox2Day5	351		18	Dox2Day5	330
2	Dox2Day5	360
7	Dox2Day5	349.091
7	Dox2Day5	348.75
7	Dox2Day5	360
7	Dox2Day5	331.2
7	Dox2Day5	330
7	Dox2Day5	360
8	Dox2Day5	344.348
8	Dox2Day5	330
8	Dox2Day5	333.333
8	Dox2Day5	360
8	Dox2Day5	360
9	Dox2Day5	322.105
9	Dox2Day5	322.105
10	Dox2Day5	317.647
10	Dox2Day5	340
10	Dox2Day5	342.857
12	Dox2Day5	345
12	Dox2Day5	330
12	Dox2Day5	346.154
12	Dox2Day5	327.273
12	Dox2Day5	341.053
12	Dox2Day5	360
12	Dox2Day5	313.043
12	Dox2Day5	324
12	Dox2Day5	302.4
12	Dox2Day5	342.857
12	Dox2Day5	360
12	Dox2Day5	342.857
13	Dox2Day5	345
13	Dox2Day5	333.333
13	Dox2Day5	330
13	Dox2Day5	360
13	Dox2Day5	360
13	Dox2Day5	360
13	Dox2Day5	360
13	Dox2Day5	360
13	Dox2Day5	360
14	Dox2Day5	330
14	Dox2Day5	330
14	Dox2Day5	328.696
14	Dox2Day5	344.348
14	Dox2Day5	340
15	Dox2Day5	294.545
15	Dox2Day5	324
15	Dox2Day5	322.105
15	Dox2Day5	296.471
15	Dox2Day5	322.759
15	Dox2Day5	320
16	Dox2Day5	331.2
16	Dox2Day5	360
16	Dox2Day5	360
16	Dox2Day5	345
16	Dox2Day5	348
17	Dox2Day5	345.6
17	Dox2Day5	328.696
17	Dox2Day5	332.308
17	Dox2Day5	349.412
17	Dox2Day5	338.824
17	Dox2Day5	345
17	Dox2Day5	344.348
17	Dox2Day5	360
18	Dox2Day5	344.348
18	Dox2Day5	341.053
18	Dox2Day5	306
18	Dox2Day5	288
18	Dox2Day5	360
18	Dox2Day5	332.308
18	Dox2Day5	347.586
