# Supplementary material for: Long ascending propriospinal neurons provide flexible, context-specific control of interlimb coordination
Source: eLife. 2020 Sep 9;9:e53565. doi: 10.7554/eLife.53565 (PMC7527236; doi:10.7554/eLife.53565)
Supplement: Figure 3—source data 4. [file elife-53565-fig3-data4.xlsx]

## Sheet: RawData
Time_ID	Animal_ID	LHL_trial1	LHL_trial2	LHL_trial3	RHL_trial1	RHL_trial2	RHL_trial3		Time_ID	Animal_ID	LHL_trial1	LHL_trial2	LHL_trial3	RHL_trial1	RHL_trial2	RHL_trial3
Baseline	1	1	0	0	0	0	0		Dox1D3	1	0	0	0	0	0	0
Baseline	2	1	0	0	1	0	0		Dox1D3	2	1	0	1	0	0	0
Baseline	7	0	0	0	0	0	0		Dox1D3	7	0	1	0	0	1	1
Baseline	8	1	0	0	0	1	0		Dox1D3	8	0	0	0	1	0	2
Baseline	9	0	1	0	0	0	0		Dox1D3	9	1	0	0	0	0	0
Baseline	10	0	0	1	0	0	0		Dox1D3	10	0	1	0	1	0	0
Baseline	12	0	0	1	2	0	1		Dox1D3	12	0	0	1	0	1	1
Baseline	13	0	0	1	0	0	0		Dox1D3	13	0	0	0	1	0	0
Baseline	14	0	0	0	0	0	0		Dox1D3	14	0	0	0	0	0	1
Baseline	15	0	0	0	0	0	1		Dox1D3	15	0	0	0	0	0	0
Baseline	16	0	0	1	0	1	0		Dox1D3	16	0	0	0	0	0	0
Baseline	17	1	1	1	0	0	0		Dox1D3	17	0	0	0	0	0	0
Baseline	18	0	0	0	1	0	0		Dox1D3	18	0	0	0	0	0	0
PreDox1	1	0	0	0	0	0	1		Dox1D5	1	0	1	0	1	0	1
PreDox1	2	1	0	0	0	0	0		Dox1D5	2	0	0	0	0	0	0
PreDox1	7	0	0	0	1	0	1		Dox1D5	7	1	0	0	0	1	1
PreDox1	8	0	0	0	0	0	0		Dox1D5	8	1	0	0	1	0	1
PreDox1	9	0	0	0	0	0	0		Dox1D5	9	0	0	0	0	1	0
PreDox1	10	0	1	0	0	1	0		Dox1D5	10	0	1	0	0	0	0
PreDox1	12	0	0	0	1	2	0		Dox1D5	12	0	0	0	0	0	2
PreDox1	13	0	0	0	0	0	1		Dox1D5	13	0	0	0	0	0	1
PreDox1	14	0	0	0	0	0	0		Dox1D5	14	0	0	0	0	0	0
PreDox1	15	2	0	1	0	1	0		Dox1D5	15	0	0	0	0	0	0
PreDox1	16	0	0	0	0	0	0		Dox1D5	16	0	0	0	0	0	0
PreDox1	17	0	0	0	0	0	1		Dox1D5	17	0	0	0	1	0	0
PreDox1	18	0	0	0	0	0	0		Dox1D5	18	0	0	0	0	0	0
DoxOff	1	1	0	0	0	1	0		Dox1D8	1	3	1	0	1	0	1
DoxOff	2	1	1	0	0	0	0		Dox1D8	2	2	0	0	1	0	0
DoxOff	7	0	0	0	0	0	0		Dox1D8	7	0	1	0	1	1	0
DoxOff	8	0	0	0	0	1	0		Dox1D8	8	0	1	0	0	1	0
DoxOff	9	0	0	0	0	0	0		Dox1D8	9	0	0	0	0	0	0
DoxOff	10	0	0	0	0	0	0		Dox1D8	10	0	0	0	0	1	0
DoxOff	12	1	0	0	1	0	1		Dox1D8	12	0	0	0	0	1	2
DoxOff	13	0	0	0	0	0	1		Dox1D8	13	0	1	0	0	0	1
DoxOff	14	0	0	0	0	0	0		Dox1D8	14	0	0	0	0	0	0
DoxOff	15	0	0	0	0	0	0		Dox1D8	15	0	2	0	0	1	0
DoxOff	16	0	0	0	0	0	0		Dox1D8	16	0	0	0	0	0	0
DoxOff	17	1	0	0	0	1	0		Dox1D8	17	1	0	0	0	0	0
DoxOff	18	1	0	0	1	0	0		Dox1D8	18	0	0	0	0	0	0
PreDox2	1	0	0	0	2	0	1		Dox2D3	1	0	0	0	0	0	0
PreDox2	2	2	0	0	0	0	0		Dox2D3	2	0	0	0	0	0	0
PreDox2	7	0	0	0	0	0	0		Dox2D3	7	0	0	0	0	0	0
PreDox2	8	0	0	0	0	0	1		Dox2D3	8	0	0	0	0	1	0
PreDox2	9	0	0	0	0	0	0		Dox2D3	9	0	0	0	0	0	0
PreDox2	10	0	0	0	1	0	0		Dox2D3	10	0	1	0	0	0	0
PreDox2	12	1	0	0	0	0	0		Dox2D3	12	0	0	0	0	0	0
PreDox2	13	0	0	0	0	0	0		Dox2D3	13	0	0	0	1	0	0
PreDox2	14	0	0	0	0	0	0		Dox2D3	14	0	0	1	0	0	0
PreDox2	15	0	0	0	1	0	0		Dox2D3	15	0	0	0	0	0	0
PreDox2	16	0	0	0	0	0	0		Dox2D3	16	0	1	0	1	1	1
PreDox2	17	0	0	0	0	0	1		Dox2D3	17	0	0	0	0	0	0
PreDox2	18	0	0	0	0	0	0		Dox2D3	18	0	0	0	0	0	0
									Dox2D5	1	0	0	0	0	1	1
									Dox2D5	2	0	0	0	0	0	0
									Dox2D5	7	0	0	0	0	0	0
									Dox2D5	8	0	0	0	0	0	0
									Dox2D5	9	0	0	0	0	0	0
									Dox2D5	10	0	1	0	0	0	0
									Dox2D5	12	0	0	0	1	0	1
									Dox2D5	13	0	0	0	0	0	0
									Dox2D5	14	0	0	1	0	0	0
									Dox2D5	15	0	0	0	0	0	0
									Dox2D5	16	0	1	0	0	0	0
									Dox2D5	17	0	0	0	0	0	0
									Dox2D5	18	0	0	0	0	1	1

## Sheet: AvgData
Animal_ID	Con_avg#_HLslips	Dox_avg#_HLslips
1	0.875	0.5
2	0.875	1.1
7	0.25	0.9
8	0.5	0.9
9	0.125	0.2
10	0.5	0.6
12	1.375	1
13	0.375	0.5
14	0	0.3
15	0.75	0.3
16	0.25	0.5
17	0.875	0.2
18	0.375	0.2
