# Supplementary material for: Long ascending propriospinal neurons provide flexible, context-specific control of interlimb coordination
Source: eLife. 2020 Sep 9;9:e53565. doi: 10.7554/eLife.53565 (PMC7527236; doi:10.7554/eLife.53565)
Supplement: Figure 3—source data 5. [file elife-53565-fig3-data5.xlsx]

## Sheet: RawData
Animal_ID	Time_ID	Limb_ID	BoS_Angle
1	Baseline	RHL	20.3671
1	Baseline	RHL	21.9024
1	Baseline	RHL	18.5233
1	Baseline	RHL	23.7105
1	Baseline	RHL	16.071
1	Baseline	RHL	14.3487
1	Baseline	RHL	9.75182
1	Baseline	RHL	19.0148
1	Baseline	RHL	17.1197
1	Baseline	RHL	26.2409
1	Baseline	RHL	28.0985
1	Baseline	RHL	24.3283
1	Baseline	RHL	21.7493
1	Baseline	RHL	12.7791
1	Baseline	RHL	7.75854
1	Baseline	RHL	29.2991
1	Baseline	RHL	24.8906
1	Baseline	RHL	19.2843
2	Baseline	RHL	14.431
2	Baseline	RHL	13.8605
2	Baseline	RHL	13.5871
2	Baseline	RHL	5.04777
2	Baseline	RHL	28.907
2	Baseline	RHL	23.2147
2	Baseline	RHL	15.9802
2	Baseline	RHL	15.3292
2	Baseline	RHL	4.79109
2	Baseline	RHL	12.1598
2	Baseline	RHL	5.99981
2	Baseline	RHL	26.3742
2	Baseline	RHL	22.8977
2	Baseline	RHL	20.9435
2	Baseline	RHL	18.4868
2	Baseline	RHL	7.99154
2	Baseline	RHL	11.2971
2	Baseline	RHL	9.18576
2	Baseline	RHL	13.8326
2	Baseline	RHL	13.0264
2	Baseline	RHL	12.0616
7	Baseline	RHL	11.0912
7	Baseline	RHL	19.9094
7	Baseline	RHL	5.91956
7	Baseline	RHL	7.37327
7	Baseline	RHL	33.1589
7	Baseline	RHL	13.4227
7	Baseline	RHL	10.1783
7	Baseline	RHL	32.7226
7	Baseline	RHL	31.6401
7	Baseline	RHL	23.5879
7	Baseline	RHL	26.0979
7	Baseline	RHL	17.4813
7	Baseline	RHL	18.5618
7	Baseline	RHL	19.0216
7	Baseline	RHL	6.64783
7	Baseline	RHL	10.806
7	Baseline	RHL	29.6159
7	Baseline	RHL	31.2214
7	Baseline	RHL	22.1879
8	Baseline	RHL	17.703
8	Baseline	RHL	10.9784
8	Baseline	RHL	13.5047
8	Baseline	RHL	21.9322
8	Baseline	RHL	19.189
8	Baseline	RHL	18.2851
8	Baseline	RHL	10.7676
8	Baseline	RHL	7.98123
8	Baseline	RHL	9.64064
8	Baseline	RHL	19.1167
8	Baseline	RHL	19.4651
8	Baseline	RHL	19.911
8	Baseline	RHL	8.9463
8	Baseline	RHL	13.045
8	Baseline	RHL	9.42379
9	Baseline	RHL	26.7086
9	Baseline	RHL	15.7113
9	Baseline	RHL	15.3326
9	Baseline	RHL	33.3857
9	Baseline	RHL	15.9857
9	Baseline	RHL	14.1367
9	Baseline	RHL	14.6931
9	Baseline	RHL	33.7224
9	Baseline	RHL	25.1603
9	Baseline	RHL	26.477
9	Baseline	RHL	20.1883
9	Baseline	RHL	20.5754
9	Baseline	RHL	27.111
9	Baseline	RHL	14.0815
9	Baseline	RHL	12.0675
9	Baseline	RHL	26.9987
9	Baseline	RHL	13.8384
9	Baseline	RHL	13.5232
10	Baseline	RHL	6.89743
10	Baseline	RHL	10.7833
10	Baseline	RHL	9.01261
10	Baseline	RHL	16.0265
10	Baseline	RHL	18.5569
10	Baseline	RHL	21.3571
10	Baseline	RHL	21.6201
10	Baseline	RHL	12.1053
10	Baseline	RHL	10.853
10	Baseline	RHL	9.15911
10	Baseline	RHL	21.5698
10	Baseline	RHL	18.8632
12	Baseline	RHL	15.4969
12	Baseline	RHL	13.1749
12	Baseline	RHL	7.35776
12	Baseline	RHL	45.6694
12	Baseline	RHL	22.4397
12	Baseline	RHL	26.9009
12	Baseline	RHL	33.5697
12	Baseline	RHL	24.8691
12	Baseline	RHL	16.3083
12	Baseline	RHL	23.125
12	Baseline	RHL	11.7581
12	Baseline	RHL	7.36913
12	Baseline	RHL	19.0699
12	Baseline	RHL	16.3079
12	Baseline	RHL	12.119
12	Baseline	RHL	31.1159
12	Baseline	RHL	26.1374
12	Baseline	RHL	24.0001
12	Baseline	RHL	16.7561
13	Baseline	RHL	24.4744
13	Baseline	RHL	19.771
13	Baseline	RHL	19.4837
13	Baseline	RHL	42.5511
13	Baseline	RHL	31.3447
13	Baseline	RHL	31.5575
13	Baseline	RHL	27.3441
13	Baseline	RHL	18.1055
13	Baseline	RHL	38.4024
13	Baseline	RHL	38.6304
13	Baseline	RHL	29.1377
13	Baseline	RHL	25.0065
13	Baseline	RHL	19.4146
13	Baseline	RHL	36.6574
13	Baseline	RHL	23.2451
13	Baseline	RHL	25.1845
13	Baseline	RHL	23.3381
14	Baseline	RHL	26.4511
14	Baseline	RHL	18.0371
14	Baseline	RHL	12.0309
14	Baseline	RHL	26.1963
14	Baseline	RHL	21.4678
14	Baseline	RHL	16.1122
14	Baseline	RHL	12.0368
14	Baseline	RHL	9.73368
14	Baseline	RHL	30.5558
14	Baseline	RHL	15.5945
14	Baseline	RHL	20.7644
14	Baseline	RHL	5.14506
14	Baseline	RHL	26.4609
14	Baseline	RHL	20.0263
14	Baseline	RHL	14.0159
14	Baseline	RHL	13.6246
14	Baseline	RHL	39.6287
14	Baseline	RHL	27.4635
14	Baseline	RHL	20.7621
15	Baseline	RHL	15.6507
15	Baseline	RHL	10.8722
15	Baseline	RHL	10.439
15	Baseline	RHL	27.9896
15	Baseline	RHL	22.6219
15	Baseline	RHL	11.826
15	Baseline	RHL	7.66896
15	Baseline	RHL	2.11084
15	Baseline	RHL	0.0305601
15	Baseline	RHL	19.973
15	Baseline	RHL	22.0942
15	Baseline	RHL	13.0666
15	Baseline	RHL	18.8067
15	Baseline	RHL	8.65894
15	Baseline	RHL	5.77128
15	Baseline	RHL	25.912
15	Baseline	RHL	24.1296
15	Baseline	RHL	15.2144
16	Baseline	RHL	22.0419
16	Baseline	RHL	9.43171
16	Baseline	RHL	8.17086
16	Baseline	RHL	11.3011
16	Baseline	RHL	33.2871
16	Baseline	RHL	21.5815
16	Baseline	RHL	16.815
16	Baseline	RHL	13.3428
16	Baseline	RHL	35.1873
16	Baseline	RHL	24.1729
16	Baseline	RHL	16.2498
16	Baseline	RHL	35.072
16	Baseline	RHL	28.3389
16	Baseline	RHL	27.3112
16	Baseline	RHL	25.7698
16	Baseline	RHL	29.857
16	Baseline	RHL	28.8561
16	Baseline	RHL	25.6229
17	Baseline	RHL	22.7672
17	Baseline	RHL	19.6134
17	Baseline	RHL	23.3971
17	Baseline	RHL	33.7512
17	Baseline	RHL	20.4881
17	Baseline	RHL	16.1139
17	Baseline	RHL	28.972
17	Baseline	RHL	24.3076
17	Baseline	RHL	20.8297
17	Baseline	RHL	39.4231
17	Baseline	RHL	34.5125
17	Baseline	RHL	20.5881
17	Baseline	RHL	27.6933
17	Baseline	RHL	17.9684
17	Baseline	RHL	13.5753
18	Baseline	RHL	21.6193
18	Baseline	RHL	18.7823
18	Baseline	RHL	9.54296
18	Baseline	RHL	32.4675
18	Baseline	RHL	25.4887
18	Baseline	RHL	18.1173
18	Baseline	RHL	20.8966
18	Baseline	RHL	10.5323
18	Baseline	RHL	37.9002
18	Baseline	RHL	35.2548
18	Baseline	RHL	23.6969
18	Baseline	RHL	45.6372
18	Baseline	RHL	25.7187
18	Baseline	RHL	21.2856
18	Baseline	RHL	30.2624
18	Baseline	RHL	16.1039
18	Baseline	RHL	9.26804
18	Baseline	RHL	9.07344
1	Baseline	LHL	35.9088
1	Baseline	LHL	29.043
1	Baseline	LHL	22.9542
1	Baseline	LHL	18.5734
1	Baseline	LHL	25.3837
1	Baseline	LHL	22.9469
1	Baseline	LHL	18.912
1	Baseline	LHL	30.0065
1	Baseline	LHL	24.454
1	Baseline	LHL	20.4567
1	Baseline	LHL	35.122
1	Baseline	LHL	14.9336
1	Baseline	LHL	13.3518
1	Baseline	LHL	28.8574
1	Baseline	LHL	27.9897
1	Baseline	LHL	19.1708
1	Baseline	LHL	19.3786
1	Baseline	LHL	10.756
2	Baseline	LHL	18.3301
2	Baseline	LHL	20.4258
2	Baseline	LHL	18.6157
2	Baseline	LHL	16.0845
2	Baseline	LHL	16.2091
2	Baseline	LHL	8.76685
2	Baseline	LHL	27.334
2	Baseline	LHL	26.2679
2	Baseline	LHL	17.4663
2	Baseline	LHL	12.9547
2	Baseline	LHL	4.12625
2	Baseline	LHL	11.6551
2	Baseline	LHL	28.5545
2	Baseline	LHL	24.0454
2	Baseline	LHL	15.8499
2	Baseline	LHL	35.7647
2	Baseline	LHL	29.6252
2	Baseline	LHL	23.4292
7	Baseline	LHL	27.2942
7	Baseline	LHL	22.8613
7	Baseline	LHL	19.5028
7	Baseline	LHL	19.027
7	Baseline	LHL	23.7657
7	Baseline	LHL	21.06
7	Baseline	LHL	28.0933
7	Baseline	LHL	14.5474
7	Baseline	LHL	8.10554
7	Baseline	LHL	37.3275
7	Baseline	LHL	22.9786
7	Baseline	LHL	17.1432
7	Baseline	LHL	28.1432
7	Baseline	LHL	26.4971
7	Baseline	LHL	18.9855
7	Baseline	LHL	16.1965
7	Baseline	LHL	7.0646
8	Baseline	LHL	25.9063
8	Baseline	LHL	21.2238
8	Baseline	LHL	13.7647
8	Baseline	LHL	16.1521
8	Baseline	LHL	17.6088
8	Baseline	LHL	12.796
8	Baseline	LHL	18.6962
8	Baseline	LHL	31.1017
8	Baseline	LHL	25.4992
8	Baseline	LHL	18.7173
8	Baseline	LHL	17.7056
8	Baseline	LHL	16.397
8	Baseline	LHL	29.7815
8	Baseline	LHL	23.9987
8	Baseline	LHL	20.8033
9	Baseline	LHL	27.0667
9	Baseline	LHL	22.2155
9	Baseline	LHL	23.7142
9	Baseline	LHL	36.5885
9	Baseline	LHL	34.0319
9	Baseline	LHL	21.7387
9	Baseline	LHL	19.9129
9	Baseline	LHL	21.8364
9	Baseline	LHL	14.2588
9	Baseline	LHL	16.4217
9	Baseline	LHL	33.1847
9	Baseline	LHL	28.068
9	Baseline	LHL	27.0102
9	Baseline	LHL	21.2783
9	Baseline	LHL	23.116
9	Baseline	LHL	24.1895
9	Baseline	LHL	29.214
9	Baseline	LHL	20.6254
10	Baseline	LHL	23.5288
10	Baseline	LHL	13.7524
10	Baseline	LHL	12.8295
10	Baseline	LHL	4.46612
10	Baseline	LHL	9.70247
10	Baseline	LHL	9.7276
10	Baseline	LHL	11.2631
10	Baseline	LHL	24.3027
10	Baseline	LHL	15.5076
10	Baseline	LHL	18.2562
10	Baseline	LHL	15.363
10	Baseline	LHL	6.46178
10	Baseline	LHL	9.21059
12	Baseline	LHL	29.5979
12	Baseline	LHL	26.2368
12	Baseline	LHL	22.301
12	Baseline	LHL	25.3189
12	Baseline	LHL	24.4658
12	Baseline	LHL	8.50302
12	Baseline	LHL	13.0845
12	Baseline	LHL	14.7583
12	Baseline	LHL	12.6147
12	Baseline	LHL	27.9158
12	Baseline	LHL	24.7707
12	Baseline	LHL	31.9407
12	Baseline	LHL	33.5854
12	Baseline	LHL	28.498
12	Baseline	LHL	23.9433
12	Baseline	LHL	18.7156
12	Baseline	LHL	18.4837
13	Baseline	LHL	28.6944
13	Baseline	LHL	25.4309
13	Baseline	LHL	19.0879
13	Baseline	LHL	8.71797
13	Baseline	LHL	5.45797
13	Baseline	LHL	2.16103
13	Baseline	LHL	38.3649
13	Baseline	LHL	25.3553
13	Baseline	LHL	20.396
13	Baseline	LHL	14.8161
13	Baseline	LHL	9.9929
13	Baseline	LHL	10.0385
13	Baseline	LHL	25.7293
13	Baseline	LHL	23.5866
13	Baseline	LHL	19.8076
13	Baseline	LHL	10.8175
13	Baseline	LHL	6.36678
13	Baseline	LHL	34.9462
13	Baseline	LHL	26.9495
13	Baseline	LHL	22.2968
14	Baseline	LHL	30.2521
14	Baseline	LHL	19.7821
14	Baseline	LHL	29.4809
14	Baseline	LHL	18.997
14	Baseline	LHL	16.6641
14	Baseline	LHL	1.08388
14	Baseline	LHL	3.77656
14	Baseline	LHL	26.6023
14	Baseline	LHL	14.5803
14	Baseline	LHL	34.6613
14	Baseline	LHL	20.9246
14	Baseline	LHL	10.0928
14	Baseline	LHL	2.19906
14	Baseline	LHL	33.5807
14	Baseline	LHL	21.3141
14	Baseline	LHL	17.8109
14	Baseline	LHL	8.67443
14	Baseline	LHL	9.02194
15	Baseline	LHL	31.3652
15	Baseline	LHL	20.6135
15	Baseline	LHL	20.7874
15	Baseline	LHL	11.1604
15	Baseline	LHL	12.1026
15	Baseline	LHL	7.98545
15	Baseline	LHL	23.2377
15	Baseline	LHL	24.9766
15	Baseline	LHL	35.3356
15	Baseline	LHL	27.8575
15	Baseline	LHL	24.619
15	Baseline	LHL	20.0454
15	Baseline	LHL	9.09503
15	Baseline	LHL	14.0198
15	Baseline	LHL	13.3259
16	Baseline	LHL	24.2852
16	Baseline	LHL	18.122
16	Baseline	LHL	19.2066
16	Baseline	LHL	19.2177
16	Baseline	LHL	9.5024
16	Baseline	LHL	26.942
16	Baseline	LHL	19.6503
16	Baseline	LHL	24.0099
16	Baseline	LHL	17.3187
16	Baseline	LHL	11.0267
16	Baseline	LHL	13.9199
16	Baseline	LHL	19.4789
16	Baseline	LHL	15.0215
16	Baseline	LHL	31.1352
16	Baseline	LHL	12.3413
16	Baseline	LHL	14.8758
17	Baseline	LHL	27.9242
17	Baseline	LHL	27.8429
17	Baseline	LHL	22.4465
17	Baseline	LHL	13.2516
17	Baseline	LHL	11.6105
17	Baseline	LHL	28.6453
17	Baseline	LHL	23.8757
17	Baseline	LHL	21.3244
17	Baseline	LHL	16.7678
17	Baseline	LHL	12.3737
17	Baseline	LHL	19.0853
17	Baseline	LHL	15.2439
17	Baseline	LHL	11.3862
17	Baseline	LHL	42.5876
17	Baseline	LHL	31.8696
17	Baseline	LHL	27.9463
17	Baseline	LHL	30.0975
18	Baseline	LHL	25.2461
18	Baseline	LHL	24.6033
18	Baseline	LHL	15.1818
18	Baseline	LHL	10.4281
18	Baseline	LHL	8.63021
18	Baseline	LHL	29.8115
18	Baseline	LHL	28.9077
18	Baseline	LHL	19.7575
18	Baseline	LHL	13.919
18	Baseline	LHL	5.01458
18	Baseline	LHL	5.13548
18	Baseline	LHL	13.4614
18	Baseline	LHL	10.1051
18	Baseline	LHL	4.01863
18	Baseline	LHL	41.8555
18	Baseline	LHL	30.4099
18	Baseline	LHL	24.9359
1	Dox1Day5	RHL	24.9023
1	Dox1Day5	RHL	22.6894
1	Dox1Day5	RHL	22.7668
1	Dox1Day5	RHL	18.5069
1	Dox1Day5	RHL	13.8979
1	Dox1Day5	RHL	11.4518
1	Dox1Day5	RHL	28.0759
1	Dox1Day5	RHL	16.8319
1	Dox1Day5	RHL	17.0682
1	Dox1Day5	RHL	14.5828
1	Dox1Day5	RHL	18.6931
1	Dox1Day5	RHL	15.3731
1	Dox1Day5	RHL	12.0675
1	Dox1Day5	RHL	30.5822
1	Dox1Day5	RHL	22.4089
1	Dox1Day5	RHL	17.3108
1	Dox1Day5	RHL	24.1331
1	Dox1Day5	RHL	17.0529
1	Dox1Day5	RHL	11.2286
1	Dox1Day5	RHL	17.6673
1	Dox1Day5	RHL	11.3113
1	Dox1Day5	RHL	10.5531
2	Dox1Day5	RHL	27.7904
2	Dox1Day5	RHL	19.7097
2	Dox1Day5	RHL	15.1434
2	Dox1Day5	RHL	17.7525
2	Dox1Day5	RHL	10.788
2	Dox1Day5	RHL	7.62988
2	Dox1Day5	RHL	20.9494
2	Dox1Day5	RHL	11.2228
2	Dox1Day5	RHL	13.1803
2	Dox1Day5	RHL	29.1612
2	Dox1Day5	RHL	24.7653
2	Dox1Day5	RHL	20.8637
2	Dox1Day5	RHL	21.6126
2	Dox1Day5	RHL	16.4084
2	Dox1Day5	RHL	14.7007
2	Dox1Day5	RHL	14.9822
2	Dox1Day5	RHL	32.1662
2	Dox1Day5	RHL	23.3158
2	Dox1Day5	RHL	21.7534
7	Dox1Day5	RHL	27.9544
7	Dox1Day5	RHL	18.7623
7	Dox1Day5	RHL	21.4036
7	Dox1Day5	RHL	11.7082
7	Dox1Day5	RHL	8.98061
7	Dox1Day5	RHL	17.6502
7	Dox1Day5	RHL	19.0879
7	Dox1Day5	RHL	14.441
7	Dox1Day5	RHL	20.0897
7	Dox1Day5	RHL	18.2717
7	Dox1Day5	RHL	22.6542
7	Dox1Day5	RHL	14.7128
7	Dox1Day5	RHL	24.9056
7	Dox1Day5	RHL	8.23695
7	Dox1Day5	RHL	9.99027
7	Dox1Day5	RHL	11.0138
7	Dox1Day5	RHL	37.7967
7	Dox1Day5	RHL	25.3107
7	Dox1Day5	RHL	23.0297
8	Dox1Day5	RHL	24.0712
8	Dox1Day5	RHL	20.093
8	Dox1Day5	RHL	18.5709
8	Dox1Day5	RHL	16.9684
8	Dox1Day5	RHL	7.36361
8	Dox1Day5	RHL	8.86079
8	Dox1Day5	RHL	30.7213
8	Dox1Day5	RHL	24.1706
8	Dox1Day5	RHL	21.88
8	Dox1Day5	RHL	16.1048
8	Dox1Day5	RHL	19.4012
8	Dox1Day5	RHL	15.9041
8	Dox1Day5	RHL	14.0394
8	Dox1Day5	RHL	27.4252
8	Dox1Day5	RHL	25.7624
8	Dox1Day5	RHL	21.9145
8	Dox1Day5	RHL	14.9627
8	Dox1Day5	RHL	22.1317
8	Dox1Day5	RHL	12.4499
8	Dox1Day5	RHL	11.4891
8	Dox1Day5	RHL	15.6863
8	Dox1Day5	RHL	8.96656
8	Dox1Day5	RHL	8.68986
9	Dox1Day5	RHL	28.7897
9	Dox1Day5	RHL	22.6091
9	Dox1Day5	RHL	26.0555
9	Dox1Day5	RHL	19.1424
9	Dox1Day5	RHL	14.9607
9	Dox1Day5	RHL	9.75009
9	Dox1Day5	RHL	26.3794
9	Dox1Day5	RHL	18.3961
9	Dox1Day5	RHL	12.3097
9	Dox1Day5	RHL	20.7467
9	Dox1Day5	RHL	18.5534
9	Dox1Day5	RHL	22.9756
9	Dox1Day5	RHL	14.5563
9	Dox1Day5	RHL	11.4541
9	Dox1Day5	RHL	26.4919
9	Dox1Day5	RHL	28.2403
9	Dox1Day5	RHL	27.1082
10	Dox1Day5	RHL	26.1593
10	Dox1Day5	RHL	16.6594
10	Dox1Day5	RHL	16.9305
10	Dox1Day5	RHL	18.383
10	Dox1Day5	RHL	8.26576
10	Dox1Day5	RHL	8.71965
10	Dox1Day5	RHL	9.093
10	Dox1Day5	RHL	16.6602
10	Dox1Day5	RHL	9.80133
10	Dox1Day5	RHL	30.7681
10	Dox1Day5	RHL	25.0995
10	Dox1Day5	RHL	27.3075
10	Dox1Day5	RHL	19.6509
10	Dox1Day5	RHL	18.4661
10	Dox1Day5	RHL	10.883
10	Dox1Day5	RHL	22.3536
10	Dox1Day5	RHL	17.7291
12	Dox1Day5	RHL	24.7215
12	Dox1Day5	RHL	17.3863
12	Dox1Day5	RHL	18.6512
12	Dox1Day5	RHL	23.7279
12	Dox1Day5	RHL	18.3972
12	Dox1Day5	RHL	18.0696
12	Dox1Day5	RHL	8.46086
12	Dox1Day5	RHL	11.6583
12	Dox1Day5	RHL	27.0968
12	Dox1Day5	RHL	22.6721
12	Dox1Day5	RHL	23.5975
12	Dox1Day5	RHL	22.778
12	Dox1Day5	RHL	17.6528
12	Dox1Day5	RHL	17.2039
12	Dox1Day5	RHL	15.0426
12	Dox1Day5	RHL	11.0773
12	Dox1Day5	RHL	3.83611
13	Dox1Day5	RHL	34.5947
13	Dox1Day5	RHL	26.7993
13	Dox1Day5	RHL	10.6406
13	Dox1Day5	RHL	18.4053
13	Dox1Day5	RHL	25.0979
13	Dox1Day5	RHL	25.5489
13	Dox1Day5	RHL	26.2225
13	Dox1Day5	RHL	12.5854
13	Dox1Day5	RHL	15.8796
13	Dox1Day5	RHL	23.337
13	Dox1Day5	RHL	21.1119
13	Dox1Day5	RHL	24.7155
13	Dox1Day5	RHL	18.357
13	Dox1Day5	RHL	34.1613
13	Dox1Day5	RHL	24.9648
13	Dox1Day5	RHL	20.0019
13	Dox1Day5	RHL	20.5121
14	Dox1Day5	RHL	24.7248
14	Dox1Day5	RHL	20.2397
14	Dox1Day5	RHL	21.425
14	Dox1Day5	RHL	11.2915
14	Dox1Day5	RHL	9.0098
14	Dox1Day5	RHL	26.5047
14	Dox1Day5	RHL	22.999
14	Dox1Day5	RHL	39.7304
14	Dox1Day5	RHL	19.8497
14	Dox1Day5	RHL	24.1937
14	Dox1Day5	RHL	18.2868
14	Dox1Day5	RHL	9.27412
14	Dox1Day5	RHL	9.93501
14	Dox1Day5	RHL	24.9146
14	Dox1Day5	RHL	18.815
14	Dox1Day5	RHL	15.5182
14	Dox1Day5	RHL	10.7713
14	Dox1Day5	RHL	14.7498
15	Dox1Day5	RHL	27.0819
15	Dox1Day5	RHL	25.667
15	Dox1Day5	RHL	17.4919
15	Dox1Day5	RHL	13.8226
15	Dox1Day5	RHL	18.946
15	Dox1Day5	RHL	29.3068
15	Dox1Day5	RHL	25.1706
15	Dox1Day5	RHL	22.5045
15	Dox1Day5	RHL	22.0034
15	Dox1Day5	RHL	17.8782
15	Dox1Day5	RHL	18.2651
15	Dox1Day5	RHL	13.8294
15	Dox1Day5	RHL	15.1416
15	Dox1Day5	RHL	30.3716
15	Dox1Day5	RHL	27.3131
15	Dox1Day5	RHL	18.4987
15	Dox1Day5	RHL	53.6791
15	Dox1Day5	RHL	18.0139
15	Dox1Day5	RHL	19.2846
16	Dox1Day5	RHL	38.9248
16	Dox1Day5	RHL	39.0775
16	Dox1Day5	RHL	27.216
16	Dox1Day5	RHL	40.9412
16	Dox1Day5	RHL	35.5925
16	Dox1Day5	RHL	27.6345
16	Dox1Day5	RHL	29.2375
16	Dox1Day5	RHL	23.7328
16	Dox1Day5	RHL	28.5497
16	Dox1Day5	RHL	13.2448
16	Dox1Day5	RHL	35.3366
16	Dox1Day5	RHL	29.772
16	Dox1Day5	RHL	19.6873
17	Dox1Day5	RHL	27.1988
17	Dox1Day5	RHL	26.8607
17	Dox1Day5	RHL	18.8011
17	Dox1Day5	RHL	19.8283
17	Dox1Day5	RHL	19.6782
17	Dox1Day5	RHL	36.882
17	Dox1Day5	RHL	29.7194
17	Dox1Day5	RHL	19.7485
17	Dox1Day5	RHL	13.7637
17	Dox1Day5	RHL	16.084
17	Dox1Day5	RHL	20.3367
17	Dox1Day5	RHL	14.2031
17	Dox1Day5	RHL	23.0852
17	Dox1Day5	RHL	28.686
17	Dox1Day5	RHL	16.0766
17	Dox1Day5	RHL	28.5682
17	Dox1Day5	RHL	22.5411
17	Dox1Day5	RHL	9.75697
18	Dox1Day5	RHL	23.0314
18	Dox1Day5	RHL	24.9057
18	Dox1Day5	RHL	17.8584
18	Dox1Day5	RHL	11.562
18	Dox1Day5	RHL	11.8288
18	Dox1Day5	RHL	11.0906
18	Dox1Day5	RHL	6.32497
18	Dox1Day5	RHL	33.1732
18	Dox1Day5	RHL	27.9923
18	Dox1Day5	RHL	22.4062
18	Dox1Day5	RHL	16.0036
18	Dox1Day5	RHL	10.186
18	Dox1Day5	RHL	11.5064
18	Dox1Day5	RHL	24.1674
18	Dox1Day5	RHL	25.7325
18	Dox1Day5	RHL	24.3035
18	Dox1Day5	RHL	18.0526
1	Dox1Day5	LHL	10.0855
1	Dox1Day5	LHL	8.57232
1	Dox1Day5	LHL	10.6999
1	Dox1Day5	LHL	34.7151
1	Dox1Day5	LHL	22.6279
1	Dox1Day5	LHL	18.8729
1	Dox1Day5	LHL	14.234
1	Dox1Day5	LHL	12.6358
1	Dox1Day5	LHL	9.75967
1	Dox1Day5	LHL	19.6889
1	Dox1Day5	LHL	16.1643
1	Dox1Day5	LHL	16.9722
1	Dox1Day5	LHL	11.693
1	Dox1Day5	LHL	12.5715
1	Dox1Day5	LHL	17.6075
1	Dox1Day5	LHL	21.9168
1	Dox1Day5	LHL	18.0366
1	Dox1Day5	LHL	26.9002
1	Dox1Day5	LHL	17.6951
1	Dox1Day5	LHL	16.0039
2	Dox1Day5	LHL	10.3946
2	Dox1Day5	LHL	8.89779
2	Dox1Day5	LHL	23.5408
2	Dox1Day5	LHL	18.3693
2	Dox1Day5	LHL	23.2915
2	Dox1Day5	LHL	15.1909
2	Dox1Day5	LHL	13.0426
2	Dox1Day5	LHL	10.6195
2	Dox1Day5	LHL	11.3224
2	Dox1Day5	LHL	9.25278
2	Dox1Day5	LHL	26.5796
2	Dox1Day5	LHL	27.0336
2	Dox1Day5	LHL	14.2054
2	Dox1Day5	LHL	7.93747
2	Dox1Day5	LHL	10.06
2	Dox1Day5	LHL	6.93114
7	Dox1Day5	LHL	17.989
7	Dox1Day5	LHL	11.1643
7	Dox1Day5	LHL	10.4296
7	Dox1Day5	LHL	26.665
7	Dox1Day5	LHL	25.5572
7	Dox1Day5	LHL	26.2017
7	Dox1Day5	LHL	27.0407
7	Dox1Day5	LHL	27.2128
7	Dox1Day5	LHL	16.6334
7	Dox1Day5	LHL	13.4945
7	Dox1Day5	LHL	11.6502
7	Dox1Day5	LHL	9.157
7	Dox1Day5	LHL	28.2894
7	Dox1Day5	LHL	21.7579
7	Dox1Day5	LHL	29.5776
7	Dox1Day5	LHL	24.5511
7	Dox1Day5	LHL	21.4345
7	Dox1Day5	LHL	13.099
7	Dox1Day5	LHL	9.23134
8	Dox1Day5	LHL	16.7043
8	Dox1Day5	LHL	15.3613
8	Dox1Day5	LHL	11.5949
8	Dox1Day5	LHL	14.0212
8	Dox1Day5	LHL	25.1138
8	Dox1Day5	LHL	21.7134
8	Dox1Day5	LHL	20.3172
8	Dox1Day5	LHL	13.9379
8	Dox1Day5	LHL	12.1094
8	Dox1Day5	LHL	7.06794
8	Dox1Day5	LHL	26.5779
8	Dox1Day5	LHL	24.3652
8	Dox1Day5	LHL	24.908
8	Dox1Day5	LHL	16.357
8	Dox1Day5	LHL	18.355
8	Dox1Day5	LHL	10.3664
8	Dox1Day5	LHL	22.3701
8	Dox1Day5	LHL	25.7173
8	Dox1Day5	LHL	27.0815
8	Dox1Day5	LHL	24.5754
8	Dox1Day5	LHL	27.52
8	Dox1Day5	LHL	25.0221
8	Dox1Day5	LHL	17.865
9	Dox1Day5	LHL	27.6422
9	Dox1Day5	LHL	16.2956
9	Dox1Day5	LHL	10.9989
9	Dox1Day5	LHL	43.7956
9	Dox1Day5	LHL	42.2809
9	Dox1Day5	LHL	31.3055
9	Dox1Day5	LHL	40.1149
9	Dox1Day5	LHL	30.9119
9	Dox1Day5	LHL	24.9809
9	Dox1Day5	LHL	27.4481
9	Dox1Day5	LHL	29.938
9	Dox1Day5	LHL	33.7159
9	Dox1Day5	LHL	27.4463
9	Dox1Day5	LHL	19.8256
9	Dox1Day5	LHL	23.3471
9	Dox1Day5	LHL	20.0617
9	Dox1Day5	LHL	10.1194
10	Dox1Day5	LHL	13.3597
10	Dox1Day5	LHL	15.7446
10	Dox1Day5	LHL	9.87038
10	Dox1Day5	LHL	30.0591
10	Dox1Day5	LHL	21.8799
10	Dox1Day5	LHL	19.7663
10	Dox1Day5	LHL	29.5275
10	Dox1Day5	LHL	18.4625
10	Dox1Day5	LHL	19.801
10	Dox1Day5	LHL	24.307
10	Dox1Day5	LHL	18.6556
10	Dox1Day5	LHL	14.2649
10	Dox1Day5	LHL	38.3492
10	Dox1Day5	LHL	28.8132
10	Dox1Day5	LHL	23.832
10	Dox1Day5	LHL	13.7893
10	Dox1Day5	LHL	18.4406
10	Dox1Day5	LHL	10.9547
12	Dox1Day5	LHL	12.0054
12	Dox1Day5	LHL	13.1591
12	Dox1Day5	LHL	9.70775
12	Dox1Day5	LHL	14.5549
12	Dox1Day5	LHL	10.1002
12	Dox1Day5	LHL	21.7772
12	Dox1Day5	LHL	21.4493
12	Dox1Day5	LHL	21.3779
12	Dox1Day5	LHL	13.1935
12	Dox1Day5	LHL	12.0158
12	Dox1Day5	LHL	11.3223
12	Dox1Day5	LHL	24.6844
12	Dox1Day5	LHL	18.1413
12	Dox1Day5	LHL	10.558
12	Dox1Day5	LHL	32.3988
12	Dox1Day5	LHL	22.983
12	Dox1Day5	LHL	21.3773
13	Dox1Day5	LHL	14.6256
13	Dox1Day5	LHL	9.902
13	Dox1Day5	LHL	23.5396
13	Dox1Day5	LHL	14.2274
13	Dox1Day5	LHL	8.16722
13	Dox1Day5	LHL	26.8543
13	Dox1Day5	LHL	22.5384
13	Dox1Day5	LHL	18.2561
13	Dox1Day5	LHL	19.1267
13	Dox1Day5	LHL	7.08529
13	Dox1Day5	LHL	24.6977
13	Dox1Day5	LHL	20.2654
13	Dox1Day5	LHL	9.57911
13	Dox1Day5	LHL	10.3523
13	Dox1Day5	LHL	6.06433
14	Dox1Day5	LHL	17.8684
14	Dox1Day5	LHL	13.298
14	Dox1Day5	LHL	45.2933
14	Dox1Day5	LHL	31.0205
14	Dox1Day5	LHL	20.4111
14	Dox1Day5	LHL	16.6
14	Dox1Day5	LHL	12.6988
14	Dox1Day5	LHL	4.83106
14	Dox1Day5	LHL	24.8038
14	Dox1Day5	LHL	11.0762
14	Dox1Day5	LHL	6.77769
14	Dox1Day5	LHL	24.3581
14	Dox1Day5	LHL	22.9087
14	Dox1Day5	LHL	17.0649
14	Dox1Day5	LHL	9.12202
14	Dox1Day5	LHL	5.8761
14	Dox1Day5	LHL	7.0954
14	Dox1Day5	LHL	14.8292
14	Dox1Day5	LHL	14.9957
15	Dox1Day5	LHL	7.38091
15	Dox1Day5	LHL	10.4198
15	Dox1Day5	LHL	10.6136
15	Dox1Day5	LHL	37.5996
15	Dox1Day5	LHL	31.0711
15	Dox1Day5	LHL	23.73
15	Dox1Day5	LHL	15.4192
15	Dox1Day5	LHL	20.7484
15	Dox1Day5	LHL	13.8085
15	Dox1Day5	LHL	13.5584
15	Dox1Day5	LHL	28.5096
15	Dox1Day5	LHL	24.5114
15	Dox1Day5	LHL	21.714
15	Dox1Day5	LHL	11.0762
15	Dox1Day5	LHL	9.04067
15	Dox1Day5	LHL	48.2544
15	Dox1Day5	LHL	26.3868
15	Dox1Day5	LHL	28.0176
16	Dox1Day5	LHL	16.5684
16	Dox1Day5	LHL	11.3753
16	Dox1Day5	LHL	10.2364
16	Dox1Day5	LHL	20.9019
16	Dox1Day5	LHL	13.773
16	Dox1Day5	LHL	9.98145
16	Dox1Day5	LHL	15.0733
16	Dox1Day5	LHL	14.2451
16	Dox1Day5	LHL	11.3409
16	Dox1Day5	LHL	28.3965
16	Dox1Day5	LHL	30.6669
16	Dox1Day5	LHL	17.0792
16	Dox1Day5	LHL	11.6451
17	Dox1Day5	LHL	22.594
17	Dox1Day5	LHL	6.51791
17	Dox1Day5	LHL	45.4652
17	Dox1Day5	LHL	27.916
17	Dox1Day5	LHL	22.3433
17	Dox1Day5	LHL	23.2267
17	Dox1Day5	LHL	11.0899
17	Dox1Day5	LHL	10.3167
17	Dox1Day5	LHL	35.2994
17	Dox1Day5	LHL	29.413
17	Dox1Day5	LHL	34.0409
17	Dox1Day5	LHL	33.1409
17	Dox1Day5	LHL	20.5644
17	Dox1Day5	LHL	16.083
17	Dox1Day5	LHL	12.0556
17	Dox1Day5	LHL	12.3661
17	Dox1Day5	LHL	23.4885
17	Dox1Day5	LHL	21.1706
18	Dox1Day5	LHL	15.5551
18	Dox1Day5	LHL	10.2634
18	Dox1Day5	LHL	28.4379
18	Dox1Day5	LHL	26.8084
18	Dox1Day5	LHL	18.8381
18	Dox1Day5	LHL	32.2812
18	Dox1Day5	LHL	27.369
18	Dox1Day5	LHL	13.3615
18	Dox1Day5	LHL	8.67584
18	Dox1Day5	LHL	34.4679
18	Dox1Day5	LHL	24.6335
18	Dox1Day5	LHL	16.1412
18	Dox1Day5	LHL	15.6235
18	Dox1Day5	LHL	10.0453
18	Dox1Day5	LHL	29.1991
18	Dox1Day5	LHL	17.0303

## Sheet: AvgData
Animal_ID	Con_avgRHL	Dox_avgRHL	Con_avgLHL	Dox_avgLHL
1	19.7354	18.1434	23.2333	16.8726
2	14.7336	19.1524	19.7503	14.7918
7	19.5077	18.7369	22.6497	19.5335
8	14.6593	17.7229	20.6768	19.5227
9	20.5387	20.5011	24.6929	27.0723
10	14.7337	17.8194	13.4132	20.5488
12	20.7129	17.7665	22.6314	17.1062
13	27.8617	22.5256	18.9507	15.6854
14	19.7951	19.0129	17.7499	16.891
15	14.602	22.8563	19.7685	21.2145
16	22.9117	29.919	18.5034	16.2526
17	24.2667	21.7677	22.6046	22.6162
18	22.8693	18.8309	18.3189	20.5457
