# Supplementary material for: Long ascending propriospinal neurons provide flexible, context-specific control of interlimb coordination
Source: eLife. 2020 Sep 9;9:e53565. doi: 10.7554/eLife.53565 (PMC7527236; doi:10.7554/eLife.53565)
Supplement: Figure 4—figure supplement 2—source data 1. [file elife-53565-fig4-figsupp2-data1.xlsx]

## Sheet: RHL_homolat
Time_ID	Animal_ID	Limb_ID	rawPhase	transPhase	stanceTime(s)	strideTime(s)	strideDist(cm)	instSpd(cm/s)
Con	1	RHL_homolat	0.647059	0.647059	0.18	0.34	16.5899	48.7938
Con	1	RHL_homolat	0.606061	0.606061	0.195	0.34	15.3159	45.0817
Con	1	RHL_homolat	0.558824	0.558824	0.185	0.34	14.5307	42.7375
Con	1	RHL_homolat	0.594595	0.594595	0.21	0.355	12.8272	36.1484
Con	1	RHL_homolat	0.485714	0.514286	0.2	0.375	16.6542	44.5467
Con	1	RHL_homolat	0.518519	0.518519	0.145	0.29	16.8309	58.3216
Con	1	RHL_homolat	0.533333	0.533333	0.145	0.29	17.1545	59.2364
Con	1	RHL_homolat	0.612903	0.612903	0.14	0.29	15.6425	54.3483
Con	1	RHL_homolat	0.483871	0.516129	0.17	0.33	16.3635	49.8636
Con	2	RHL_homolat	0.677419	0.677419	0.16	0.32	15.4802	48.4292
Con	2	RHL_homolat	0.628571	0.628571	0.185	0.345	15.6619	45.4112
Con	2	RHL_homolat	0.645161	0.645161	0.175	0.32	15.8447	49.5633
Con	2	RHL_homolat	0.481481	0.518519	0.13	0.28	18.9383	67.7605
Con	2	RHL_homolat	0.5	0.5	0.135	0.29	17.7571	61.3248
Con	2	RHL_homolat	0.533333	0.533333	0.145	0.3	17.9226	59.742
Con	2	RHL_homolat	0.517241	0.517241	0.12	0.275	17.2519	62.4604
Con	2	RHL_homolat	0.541667	0.541667	0.115	0.245	16.9437	69.1645
Con	2	RHL_homolat	0.5	0.5	0.12	0.25	14.6031	58.7673
Con	2	RHL_homolat	0.678571	0.678571	0.125	0.25	13.2098	53.4507
Con	7	RHL_homolat	0.677419	0.677419	0.18	0.33	15.9114	48.0106
Con	7	RHL_homolat	0.5625	0.5625	0.15	0.305	16.1856	53.0398
Con	7	RHL_homolat	0.652174	0.652174	0.09	0.215	16.4785	77.1401
Con	7	RHL_homolat	0.56	0.56	0.115	0.255	15.5483	61.0192
Con	7	RHL_homolat	0.571429	0.571429	0.09	0.215	20.2508	94.2038
Con	7	RHL_homolat	0.56	0.56	0.11	0.245	17.8476	73.1055
Con	7	RHL_homolat	0.545455	0.545455	0.1	0.21	17.863	85.144
Con	8	RHL_homolat	0.65625	0.65625	0.17	0.315	13.6783	43.4671
Con	8	RHL_homolat	0.514286	0.514286	0.165	0.31	15.9228	51.3669
Con	8	RHL_homolat	0.566667	0.566667	0.13	0.28	15.8421	56.6
Con	8	RHL_homolat	0.4375	0.5625	0.17	0.335	17.8685	53.2801
Con	8	RHL_homolat	0.517241	0.517241	0.13	0.255	15.4683	60.7327
Con	9	RHL_homolat	0.576923	0.576923	0.135	0.26	13.598	52.3
Con	9	RHL_homolat	0.566667	0.566667	0.15	0.29	14.4641	49.9052
Con	9	RHL_homolat	0.538462	0.538462	0.13	0.26	13.8415	53.2366
Con	9	RHL_homolat	0.533333	0.533333	0.155	0.285	13.0661	45.8864
Con	9	RHL_homolat	0.666667	0.666667	0.18	0.31	10.3247	33.2455
Con	9	RHL_homolat	0.542857	0.542857	0.2	0.335	13.2208	39.4048
Con	9	RHL_homolat	0.652174	0.652174	0.115	0.23	14.754	64.1477
Con	9	RHL_homolat	0.592593	0.592593	0.14	0.265	13.987	52.7478
Con	10	RHL_homolat	0.730769	0.730769	0.14	0.28	16.4123	58.6313
Con	10	RHL_homolat	0.666667	0.666667	0.135	0.27	16.3265	60.4686
Con	10	RHL_homolat	0.62963	0.62963	0.13	0.28	18.6055	66.5182
Con	10	RHL_homolat	0.608696	0.608696	0.115	0.24	18.0427	75.1603
Con	10	RHL_homolat	0.541667	0.541667	0.12	0.245	19.4319	79.2926
Con	12	RHL_homolat	0.69697	0.69697	0.165	0.335	15.4272	46.0453
Con	12	RHL_homolat	0.586207	0.586207	0.165	0.305	17.4815	57.3856
Con	12	RHL_homolat	0.633333	0.633333	0.155	0.3	16.1786	53.9287
Con	12	RHL_homolat	0.580645	0.580645	0.155	0.32	16.9161	52.8221
Con	12	RHL_homolat	0.5	0.5	0.1	0.25	19.1023	76.4494
Con	12	RHL_homolat	0.64	0.64	0.105	0.24	14.1355	58.7385
Con	12	RHL_homolat	0.484848	0.515152	0.14	0.305	16.7397	55.1101
Con	12	RHL_homolat	0.545455	0.545455	0.105	0.235	17.6352	75.1498
Con	12	RHL_homolat	0.607143	0.607143	0.125	0.275	14.3827	52.2959
Con	12	RHL_homolat	0.551724	0.551724	0.145	0.28	14.8002	52.9362
Con	13	RHL_homolat	0.516129	0.516129	0.155	0.315	18.7456	59.5034
Con	13	RHL_homolat	0.558824	0.558824	0.17	0.34	17.444	51.306
Con	13	RHL_homolat	0.571429	0.571429	0.13	0.28	18.5199	66.1426
Con	13	RHL_homolat	0.607143	0.607143	0.125	0.28	17.0457	60.8774
Con	13	RHL_homolat	0.541667	0.541667	0.1	0.24	19.972	83.2168
Con	13	RHL_homolat	0.541667	0.541667	0.095	0.24	19.2325	80.1356
Con	13	RHL_homolat	0.409091	0.590909	0.08	0.215	21.3334	99.236
Con	13	RHL_homolat	0.466667	0.533333	0.135	0.285	18.8007	66.1975
Con	13	RHL_homolat	0.538462	0.538462	0.12	0.275	18.7885	68.4145
Con	13	RHL_homolat	0.444444	0.555556	0.12	0.27	19.3066	71.506
Con	14	RHL_homolat	0.510638	0.510638	0.27	0.465	16.2218	34.8841
Con	14	RHL_homolat	0.632653	0.632653	0.31	0.465	13.83	29.7744
Con	14	RHL_homolat	0.586207	0.586207	0.145	0.29	18.0808	62.3476
Con	14	RHL_homolat	0.592593	0.592593	0.14	0.285	17.2938	60.7429
Con	14	RHL_homolat	0.521739	0.521739	0.085	0.22	20.9236	95.1199
Con	14	RHL_homolat	0.55	0.55	0.09	0.215	20.3487	94.7057
Con	14	RHL_homolat	0.5	0.5	0.085	0.21	19.7511	93.9002
Con	14	RHL_homolat	0.655172	0.655172	0.135	0.28	16.4682	58.8838
Con	14	RHL_homolat	0.645161	0.645161	0.145	0.31	14.8043	47.7557
Con	14	RHL_homolat	0.55	0.55	0.085	0.2	17.7708	88.8538
Con	14	RHL_homolat	0.5	0.5	0.085	0.23	20.6661	89.903
Con	14	RHL_homolat	0.590909	0.590909	0.085	0.22	18.1167	82.3486
Con	15	RHL_homolat	0.558824	0.558824	0.17	0.335	18.2302	54.4418
Con	15	RHL_homolat	0.575758	0.575758	0.165	0.325	17.8287	54.8449
Con	15	RHL_homolat	0.615385	0.615385	0.11	0.26	18.0686	69.4946
Con	15	RHL_homolat	0.472222	0.527778	0.15	0.335	17.3585	51.8631
Con	15	RHL_homolat	0.545455	0.545455	0.1	0.225	16.9246	75.2659
Con	15	RHL_homolat	0.44	0.56	0.11	0.245	20.6868	84.4933
Con	15	RHL_homolat	0.409091	0.590909	0.08	0.22	20.1305	91.5021
Con	15	RHL_homolat	0.52	0.52	0.1	0.25	17.8712	71.4849
Con	15	RHL_homolat	0.5	0.5	0.19	0.34	14.6192	42.9977
Con	15	RHL_homolat	0.617647	0.617647	0.22	0.34	12.1409	35.7085
Con	16	RHL_homolat	0.695652	0.695652	0.1	0.24	18.6555	77.7155
Con	16	RHL_homolat	0.666667	0.666667	0.105	0.25	18.8026	75.2755
Con	16	RHL_homolat	0.62069	0.62069	0.115	0.27	18.4605	68.6634
Con	16	RHL_homolat	0.666667	0.666667	0.11	0.25	17.8381	71.4706
Con	16	RHL_homolat	0.608696	0.608696	0.085	0.23	20.0538	87.1904
Con	16	RHL_homolat	0.533333	0.533333	0.115	0.295	17.0393	57.8207
Con	16	RHL_homolat	0.642857	0.642857	0.135	0.32	15.8508	50.5602
Con	16	RHL_homolat	0.628571	0.628571	0.185	0.36	11.6288	32.3385
Con	16	RHL_homolat	0.536585	0.536585	0.235	0.425	13.4693	31.5679
Con	16	RHL_homolat	0.46875	0.53125	0.14	0.32	18.0897	56.5304
Con	16	RHL_homolat	0.695652	0.695652	0.09	0.225	16.6706	74.1447
Con	17	RHL_homolat	0.657895	0.657895	0.185	0.375	15.6771	41.8091
Con	17	RHL_homolat	0.6	0.6	0.185	0.395	16.9271	42.8621
Con	17	RHL_homolat	0.517241	0.517241	0.13	0.29	18.7226	64.5607
Con	17	RHL_homolat	0.551724	0.551724	0.115	0.28	19.2319	68.6218
Con	17	RHL_homolat	0.517241	0.517241	0.125	0.29	18.6984	64.4772
Con	17	RHL_homolat	0.56	0.56	0.1	0.255	18.411	72.1997
Con	17	RHL_homolat	0.586207	0.586207	0.105	0.265	16.3653	61.7236
Con	17	RHL_homolat	0.5	0.5	0.175	0.35	15.275	43.5936
Con	18	RHL_homolat	0.6	0.6	0.15	0.3	16.9263	56.4209
Con	18	RHL_homolat	0.655172	0.655172	0.15	0.29	15.993	55.1483
Con	18	RHL_homolat	0.56	0.56	0.11	0.26	18.7733	72.2945
Con	18	RHL_homolat	0.5	0.5	0.095	0.255	17.4098	68.6264
Con	18	RHL_homolat	0.636364	0.636364	0.165	0.31	14.2461	45.8971
Con	18	RHL_homolat	0.555556	0.555556	0.095	0.275	17.8256	64.7908
Con	18	RHL_homolat	0.56	0.56	0.1	0.26	17.0523	65.6538
Con	18	RHL_homolat	0.541667	0.541667	0.09	0.245	17.4363	71.2146
Con	18	RHL_homolat	0.466667	0.533333	0.12	0.29	17.2201	59.3728
Con	18	RHL_homolat	0.541667	0.541667	0.095	0.245	17.31	70.6865
Con	18	RHL_homolat	0.56	0.56	0.105	0.25	15.0487	60.1949
Con	18	RHL_homolat	0.551724	0.551724	0.135	0.275	15.4263	56.2649
Con	1	RHL_homolat	0.545455	0.545455	0.165	0.33	16.9481	51.358
Con	1	RHL_homolat	0.516129	0.516129	0.155	0.32	17.3851	54.4155
Con	1	RHL_homolat	0.527778	0.527778	0.18	0.37	13.0837	35.5868
Con	1	RHL_homolat	0.464286	0.535714	0.12	0.28	20.0886	71.7452
Con	1	RHL_homolat	0.433333	0.566667	0.14	0.305	19.3679	63.5059
Con	2	RHL_homolat	0.53125	0.53125	0.18	0.33	16.6999	50.625
Con	2	RHL_homolat	0.555556	0.555556	0.17	0.345	15.9238	46.2493
Con	2	RHL_homolat	0.545455	0.545455	0.185	0.35	16.8262	47.9353
Con	2	RHL_homolat	0.441176	0.558824	0.17	0.315	17.3443	55.053
Con	2	RHL_homolat	0.464286	0.535714	0.135	0.28	17.8191	63.6396
Con	2	RHL_homolat	0.464286	0.535714	0.13	0.265	15.4552	58.1437
Con	7	RHL_homolat	0.5	0.5	0.175	0.355	17.6177	49.6228
Con	7	RHL_homolat	0.533333	0.533333	0.155	0.295	14.7899	49.7709
Con	7	RHL_homolat	0.52	0.52	0.095	0.25	19.8367	74.8237
Con	7	RHL_homolat	0.5	0.5	0.12	0.265	18.0978	67.4592
Con	7	RHL_homolat	0.538462	0.538462	0.115	0.265	18.098	65.9427
Con	7	RHL_homolat	0.5	0.5	0.13	0.285	15.8457	50.1362
Con	8	RHL_homolat	0.741935	0.741935	0.145	0.325	13.4393	41.3268
Con	8	RHL_homolat	0.5625	0.5625	0.155	0.3	14.9809	49.906
Con	8	RHL_homolat	0.583333	0.583333	0.205	0.375	13.6102	36.3134
Con	8	RHL_homolat	0.484848	0.515152	0.175	0.355	16.8369	47.4191
Con	8	RHL_homolat	0.5	0.5	0.18	0.35	15.8054	45.1455
Con	8	RHL_homolat	0.551724	0.551724	0.15	0.29	15.0361	51.8485
Con	8	RHL_homolat	0.62069	0.62069	0.155	0.295	13.6196	46.1506
Con	8	RHL_homolat	0.6	0.6	0.15	0.29	13.5457	46.6634
Con	9	RHL_homolat	0.571429	0.571429	0.13	0.27	17.2509	63.9027
Con	9	RHL_homolat	0.612903	0.612903	0.155	0.305	15.5922	51.098
Con	9	RHL_homolat	0.566667	0.566667	0.15	0.3	16.155	53.8501
Con	9	RHL_homolat	0.566667	0.566667	0.145	0.29	15.1144	52.1204
Con	9	RHL_homolat	0.517241	0.517241	0.155	0.29	15.3134	52.8048
Con	9	RHL_homolat	0.551724	0.551724	0.14	0.29	16.6598	57.4477
Con	9	RHL_homolat	0.592593	0.592593	0.13	0.275	15.2834	55.5833
Con	10	RHL_homolat	0.576923	0.576923	0.115	0.26	19.2887	74.1873
Con	10	RHL_homolat	0.583333	0.583333	0.115	0.25	18.5058	74.1093
Con	10	RHL_homolat	0.538462	0.538462	0.1	0.24	19.9829	83.4459
Con	10	RHL_homolat	0.636364	0.636364	0.095	0.23	19.2032	83.529
Con	10	RHL_homolat	0.5	0.5	0.12	0.26	19.8824	76.4708
Con	10	RHL_homolat	0.625	0.625	0.105	0.245	17.5439	71.5979
Con	10	RHL_homolat	0.653846	0.653846	0.13	0.275	17.2724	62.774
Con	10	RHL_homolat	0.555556	0.555556	0.12	0.265	18.1524	68.4712
Con	10	RHL_homolat	0.518519	0.518519	0.115	0.26	19.8058	76.2025
Con	10	RHL_homolat	0.6	0.6	0.115	0.245	17.919	73.1348
Con	10	RHL_homolat	0.636364	0.636364	0.1	0.23	19.4185	84.4885
Con	10	RHL_homolat	0.681818	0.681818	0.09	0.215	17.5318	81.5306
Con	12	RHL_homolat	0.555556	0.555556	0.13	0.28	19.183	68.467
Con	12	RHL_homolat	0.580645	0.580645	0.13	0.285	19.226	67.4878
Con	12	RHL_homolat	0.545455	0.545455	0.085	0.22	21.6118	98.2353
Con	12	RHL_homolat	0.541667	0.541667	0.095	0.24	18.9253	78.8554
Con	12	RHL_homolat	0.652174	0.652174	0.09	0.245	17.4087	71.7047
Con	12	RHL_homolat	0.608696	0.608696	0.12	0.275	16.5395	62.5627
Con	12	RHL_homolat	0.655172	0.655172	0.145	0.315	14.6138	46.9341
Con	12	RHL_homolat	0.5	0.5	0.095	0.25	21.4303	85.8009
Con	13	RHL_homolat	0.545455	0.545455	0.17	0.35	19.9275	57.0149
Con	13	RHL_homolat	0.538462	0.538462	0.195	0.37	17.6214	47.6191
Con	13	RHL_homolat	0.571429	0.571429	0.11	0.265	18.5068	69.7303
Con	13	RHL_homolat	0.666667	0.666667	0.1	0.26	16.6297	64.0769
Con	13	RHL_homolat	0.466667	0.533333	0.15	0.305	21.4987	70.4818
Con	13	RHL_homolat	0.521739	0.521739	0.1	0.23	20.2261	87.9394
Con	13	RHL_homolat	0.607143	0.607143	0.12	0.285	17.97	63.1013
Con	13	RHL_homolat	0.612903	0.612903	0.15	0.32	15.1494	47.6182
Con	13	RHL_homolat	0.6	0.6	0.125	0.285	17.9298	62.9427
Con	13	RHL_homolat	0.542857	0.542857	0.19	0.355	17.1963	48.4424
Con	14	RHL_homolat	0.6875	0.6875	0.16	0.31	17.8757	57.6834
Con	14	RHL_homolat	0.666667	0.666667	0.14	0.295	19.6702	66.7003
Con	14	RHL_homolat	0.689655	0.689655	0.12	0.285	19.289	67.6807
Con	14	RHL_homolat	0.62963	0.62963	0.125	0.285	19.7928	69.6229
Con	14	RHL_homolat	0.62069	0.62069	0.165	0.305	18.6222	60.93
Con	14	RHL_homolat	0.56	0.56	0.12	0.255	20.3996	80.0744
Con	14	RHL_homolat	0.666667	0.666667	0.12	0.275	20.3181	73.8427
Con	14	RHL_homolat	0.64	0.64	0.105	0.25	20.5532	82.2128
Con	14	RHL_homolat	0.538462	0.538462	0.09	0.235	20.4001	70.2261
Con	15	RHL_homolat	0.575758	0.575758	0.19	0.35	17.2386	49.2915
Con	15	RHL_homolat	0.555556	0.555556	0.18	0.355	19.0769	53.7414
Con	15	RHL_homolat	0.451613	0.548387	0.145	0.325	20.3943	62.7738
Con	15	RHL_homolat	0.631579	0.631579	0.19	0.34	11.7013	33.959
Con	15	RHL_homolat	0.666667	0.666667	0.12	0.26	18.1472	69.7947
Con	15	RHL_homolat	0.545455	0.545455	0.08	0.225	22.3099	99.1137
Con	15	RHL_homolat	0.521739	0.521739	0.085	0.23	19.9529	86.7516
Con	15	RHL_homolat	0.586207	0.586207	0.13	0.28	16.3956	58.4745
Con	15	RHL_homolat	0.5	0.5	0.105	0.26	17.9886	69.5296
Con	16	RHL_homolat	0.642857	0.642857	0.135	0.29	18.7396	64.6181
Con	16	RHL_homolat	0.62069	0.62069	0.135	0.29	19.0986	65.8574
Con	16	RHL_homolat	0.64	0.64	0.115	0.255	18.2409	71.4718
Con	16	RHL_homolat	0.56	0.56	0.1	0.245	20.4866	83.5898
Con	16	RHL_homolat	0.518519	0.518519	0.105	0.26	19.2376	73.7511
Con	16	RHL_homolat	0.714286	0.714286	0.11	0.275	15.1199	54.9881
Con	16	RHL_homolat	0.535714	0.535714	0.14	0.28	19.7175	70.4196
Con	16	RHL_homolat	0.666667	0.666667	0.13	0.345	14.1079	41.167
Con	16	RHL_homolat	0.5	0.5	0.2	0.39	14.5297	37.3132
Con	17	RHL_homolat	0.53125	0.53125	0.165	0.325	17.4316	53.657
Con	17	RHL_homolat	0.542857	0.542857	0.205	0.345	17.4471	50.5926
Con	17	RHL_homolat	0.677419	0.677419	0.155	0.33	16.2505	49.3431
Con	17	RHL_homolat	0.588235	0.588235	0.165	0.34	15.8775	46.6985
Con	17	RHL_homolat	0.514286	0.514286	0.18	0.355	18.578	52.31
Con	17	RHL_homolat	0.516129	0.516129	0.13	0.305	18.9108	61.9606
Con	17	RHL_homolat	0.5	0.5	0.11	0.27	19.6091	72.6568
Con	17	RHL_homolat	0.53125	0.53125	0.225	0.36	13.8406	38.4997
Con	17	RHL_homolat	0.59375	0.59375	0.155	0.315	15.2929	48.5638
Con	17	RHL_homolat	0.645833	0.645833	0.24	0.44	9.72362	21.9441
Con	18	RHL_homolat	0.69697	0.69697	0.175	0.33	16.2875	49.3562
Con	18	RHL_homolat	0.65625	0.65625	0.17	0.335	15.8914	47.6211
Con	18	RHL_homolat	0.652174	0.652174	0.11	0.245	18.194	74.4317
Con	18	RHL_homolat	0.571429	0.571429	0.115	0.275	17.04	61.9668
Con	18	RHL_homolat	0.657143	0.657143	0.14	0.29	13.7369	47.596
Con	18	RHL_homolat	0.590909	0.590909	0.085	0.215	19.4673	90.5514
Con	18	RHL_homolat	0.583333	0.583333	0.1	0.23	18.5807	80.9544
Con	18	RHL_homolat	0.592593	0.592593	0.125	0.235	15.3362	66.7719
Con	18	RHL_homolat	0.636364	0.636364	0.11	0.245	18.0106	73.3585
Con	18	RHL_homolat	0.521739	0.521739	0.08	0.23	21.2715	92.485
Con	1	RHL_homolat	0.558824	0.558824	0.15	0.33	21.6734	65.7264
Con	1	RHL_homolat	0.527778	0.527778	0.17	0.36	20.131	55.9193
Con	1	RHL_homolat	0.516129	0.516129	0.13	0.29	21.2226	73.61
Con	1	RHL_homolat	0.607143	0.607143	0.125	0.29	20.7623	71.7218
Con	1	RHL_homolat	0.5625	0.5625	0.16	0.335	20.5703	61.3984
Con	1	RHL_homolat	0.540541	0.540541	0.16	0.38	16.713	44.2989
Con	1	RHL_homolat	0.529412	0.529412	0.14	0.34	22.9289	67.438
Con	1	RHL_homolat	0.5	0.5	0.23	0.46	20.2951	44.1199
Con	1	RHL_homolat	0.585366	0.585366	0.2	0.405	17.95	44.338
Con	1	RHL_homolat	0.516129	0.516129	0.14	0.315	21.8198	69.2666
Con	2	RHL_homolat	0.538462	0.538462	0.12	0.26	20.9463	80.5627
Con	2	RHL_homolat	0.535714	0.535714	0.105	0.275	23.5147	85.4984
Con	2	RHL_homolat	0.5	0.5	0.08	0.22	25.7324	116.965
Con	2	RHL_homolat	0.470588	0.529412	0.145	0.32	19.2239	59.9227
Con	2	RHL_homolat	0.611111	0.611111	0.2	0.37	12.9514	35.3245
Con	2	RHL_homolat	0.433333	0.566667	0.13	0.285	20.9348	73.6478
Con	2	RHL_homolat	0.5	0.5	0.115	0.285	21.1059	74.0404
Con	2	RHL_homolat	0.642857	0.642857	0.125	0.26	14.5351	56.491
Con	7	RHL_homolat	0.515152	0.515152	0.145	0.335	20.1534	60.1592
Con	7	RHL_homolat	0.538462	0.538462	0.165	0.39	16.749	42.9462
Con	7	RHL_homolat	0.653846	0.653846	0.285	0.55	13.0666	23.8263
Con	7	RHL_homolat	0.54717	0.54717	0.345	0.5	11.6685	23.425
Con	7	RHL_homolat	0.531915	0.531915	0.28	0.495	14.5492	29.4747
Con	7	RHL_homolat	0.514286	0.514286	0.18	0.33	17.8293	54.2249
Con	7	RHL_homolat	0.548387	0.548387	0.15	0.31	18.5774	59.9271
Con	7	RHL_homolat	0.516129	0.516129	0.14	0.295	17.96	60.8297
Con	7	RHL_homolat	0.564103	0.564103	0.215	0.42	14.2954	34.164
Con	7	RHL_homolat	0.651163	0.651163	0.27	0.445	12.4717	27.9973
Con	7	RHL_homolat	0.518519	0.518519	0.1	0.285	19.3393	67.7604
Con	8	RHL_homolat	0.6	0.6	0.12	0.29	19.3199	66.6083
Con	8	RHL_homolat	0.638889	0.638889	0.19	0.37	14.8523	40.1689
Con	8	RHL_homolat	0.517241	0.517241	0.125	0.295	21.5901	73.189
Con	8	RHL_homolat	0.606061	0.606061	0.13	0.29	17.2683	59.6764
Con	8	RHL_homolat	0.612903	0.612903	0.13	0.29	16.894	58.314
Con	8	RHL_homolat	0.536585	0.536585	0.245	0.41	13.4751	32.8661
Con	8	RHL_homolat	0.473684	0.526316	0.21	0.37	17.0349	46.1064
Con	8	RHL_homolat	0.71875	0.71875	0.16	0.315	14.4047	45.7156
Con	8	RHL_homolat	0.541667	0.541667	0.095	0.23	22.568	98.1567
Con	9	RHL_homolat	0.545455	0.545455	0.075	0.22	22.8928	104.058
Con	9	RHL_homolat	0.478261	0.521739	0.085	0.23	22.4813	97.7446
Con	9	RHL_homolat	0.59375	0.59375	0.18	0.33	16.6724	50.4875
Con	9	RHL_homolat	0.551724	0.551724	0.14	0.285	18.6467	65.443
Con	9	RHL_homolat	0.558824	0.558824	0.16	0.325	16.2379	50.009
Con	9	RHL_homolat	0.6	0.6	0.11	0.24	18.1367	75.5009
Con	9	RHL_homolat	0.655172	0.655172	0.135	0.275	14.9495	54.2873
Con	9	RHL_homolat	0.555556	0.555556	0.14	0.285	18.7165	65.7136
Con	9	RHL_homolat	0.6	0.6	0.145	0.32	16.6924	52.0101
Con	10	RHL_homolat	0.551724	0.551724	0.12	0.29	22.1047	76.2231
Con	10	RHL_homolat	0.583333	0.583333	0.095	0.245	21.1089	86.2036
Con	10	RHL_homolat	0.6	0.6	0.115	0.29	18.809	64.7882
Con	10	RHL_homolat	0.6875	0.6875	0.155	0.33	16.032	48.6085
Con	10	RHL_homolat	0.487179	0.512821	0.195	0.385	17.0625	44.3401
Con	10	RHL_homolat	0.416667	0.583333	0.22	0.385	16.9775	44.7759
Con	10	RHL_homolat	0.416667	0.583333	0.2	0.355	20.594	58.0511
Con	10	RHL_homolat	0.636364	0.636364	0.09	0.22	18.4752	83.978
Con	10	RHL_homolat	0.583333	0.583333	0.085	0.235	22.2057	94.5658
Con	10	RHL_homolat	0.56	0.56	0.1	0.255	19.2541	75.6103
Con	12	RHL_homolat	0.538462	0.538462	0.09	0.245	24.5535	100.444
Con	12	RHL_homolat	0.5	0.5	0.1	0.245	22.0817	84.9296
Con	12	RHL_homolat	0.636364	0.636364	0.115	0.29	18.2984	56.1858
Con	12	RHL_homolat	0.653846	0.653846	0.115	0.27	16.9575	59.9949
Con	13	RHL_homolat	0.586207	0.586207	0.135	0.295	18.0604	61.2042
Con	13	RHL_homolat	0.548387	0.548387	0.135	0.295	19.5489	66.2743
Con	13	RHL_homolat	0.518519	0.518519	0.125	0.285	19.8989	69.7969
Con	13	RHL_homolat	0.533333	0.533333	0.13	0.285	18.7543	65.7641
Con	13	RHL_homolat	0.521739	0.521739	0.1	0.24	20.4572	85.202
Con	13	RHL_homolat	0.5	0.5	0.09	0.235	21.126	89.888
Con	13	RHL_homolat	0.71875	0.71875	0.21	0.34	14.9052	43.7418
Con	13	RHL_homolat	0.518519	0.518519	0.115	0.26	19.4524	74.8368
Con	14	RHL_homolat	0.615385	0.615385	0.125	0.28	18.7509	67.0475
Con	14	RHL_homolat	0.551724	0.551724	0.135	0.285	18.8177	66.0211
Con	14	RHL_homolat	0.5	0.5	0.1	0.235	21.2434	90.4482
Con	14	RHL_homolat	0.541667	0.541667	0.095	0.24	21.0427	87.678
Con	14	RHL_homolat	0.684211	0.684211	0.205	0.375	14.6706	39.1158
Con	14	RHL_homolat	0.564103	0.564103	0.22	0.39	16.1886	41.5093
Con	14	RHL_homolat	0.541667	0.541667	0.105	0.25	19.3855	77.582
Con	14	RHL_homolat	0.551724	0.551724	0.13	0.295	19.1766	65.0274
Con	15	RHL_homolat	0.541667	0.541667	0.095	0.25	21.7482	86.9854
Con	15	RHL_homolat	0.5	0.5	0.085	0.235	21.7889	92.6265
Con	15	RHL_homolat	0.583333	0.583333	0.19	0.375	16.7996	44.8033
Con	15	RHL_homolat	0.487805	0.512195	0.21	0.405	18.0657	44.6053
Con	15	RHL_homolat	0.575	0.575	0.215	0.41	14.939	36.4957
Con	15	RHL_homolat	0.483871	0.516129	0.125	0.29	18.4571	63.6974
Con	15	RHL_homolat	0.44	0.56	0.1	0.245	20.909	85.4036
Con	15	RHL_homolat	0.5	0.5	0.095	0.23	19.1945	83.271
Con	16	RHL_homolat	0.566667	0.566667	0.125	0.28	19.0592	68.2597
Con	16	RHL_homolat	0.741935	0.741935	0.15	0.315	15.604	49.5325
Con	16	RHL_homolat	0.676471	0.676471	0.175	0.345	15.1761	44.0133
Con	16	RHL_homolat	0.652174	0.652174	0.1	0.24	19.8504	82.8057
Con	16	RHL_homolat	0.547619	0.547619	0.24	0.44	15.8944	36.137
Con	16	RHL_homolat	0.545455	0.545455	0.155	0.33	18.8987	57.2689
Con	16	RHL_homolat	0.533333	0.533333	0.115	0.28	19.5797	69.9897
Con	16	RHL_homolat	0.571429	0.571429	0.125	0.295	17.9786	61.0196
Con	16	RHL_homolat	0.678571	0.678571	0.15	0.305	13.973	46.138
Con	16	RHL_homolat	0.558824	0.558824	0.16	0.32	16.8372	52.812
Con	17	RHL_homolat	0.518519	0.518519	0.11	0.265	19.6254	74.1126
Con	17	RHL_homolat	0.5	0.5	0.105	0.265	20.3542	76.851
Con	17	RHL_homolat	0.466667	0.533333	0.125	0.29	19.8495	68.5868
Con	17	RHL_homolat	0.5625	0.5625	0.14	0.305	16.4259	53.696
Con	17	RHL_homolat	0.431818	0.568182	0.27	0.45	17.4972	38.8769
Con	17	RHL_homolat	0.457143	0.542857	0.165	0.345	17.7935	51.5595
Con	17	RHL_homolat	0.535714	0.535714	0.11	0.265	18.5058	70.0227
Con	17	RHL_homolat	0.56	0.56	0.105	0.26	18.6436	71.7831
Con	17	RHL_homolat	0.515152	0.515152	0.15	0.34	16.2436	47.7662
Con	17	RHL_homolat	0.545455	0.545455	0.175	0.33	15.5239	47.0421
Con	18	RHL_homolat	0.62963	0.62963	0.14	0.285	16.7901	58.8505
Con	18	RHL_homolat	0.741935	0.741935	0.13	0.28	12.9409	46.2509
Con	18	RHL_homolat	0.565217	0.565217	0.11	0.24	17.8225	74.2505
Con	18	RHL_homolat	0.566667	0.566667	0.13	0.28	16.9267	60.5468
Con	18	RHL_homolat	0.709677	0.709677	0.175	0.31	14.9668	48.28
Con	18	RHL_homolat	0.571429	0.571429	0.095	0.225	19.2003	85.5416
Con	18	RHL_homolat	0.586207	0.586207	0.16	0.3	16.3597	54.5858
Con	18	RHL_homolat	0.571429	0.571429	0.08	0.21	20.7733	98.9206
Con	18	RHL_homolat	0.545455	0.545455	0.08	0.225	21.0554	93.6368
Con	1	RHL_homolat	0.5	0.5	0.17	0.345	20.5905	59.8136
Con	1	RHL_homolat	0.516129	0.516129	0.13	0.305	21.2375	69.7374
Con	1	RHL_homolat	0.5	0.5	0.17	0.36	22.1685	61.6781
Con	1	RHL_homolat	0.588235	0.588235	0.175	0.34	19.0904	56.1483
Con	1	RHL_homolat	0.46875	0.53125	0.14	0.31	20.7075	67.0635
Con	2	RHL_homolat	0.5	0.5	0.115	0.265	21.6429	81.6635
Con	2	RHL_homolat	0.52	0.52	0.11	0.26	20.8649	80.2622
Con	2	RHL_homolat	0.675676	0.675676	0.17	0.31	13.7552	45.9219
Con	2	RHL_homolat	0.5	0.5	0.255	0.475	17.7149	37.4848
Con	2	RHL_homolat	0.487179	0.512821	0.2	0.405	19.0825	47.1709
Con	2	RHL_homolat	0.6	0.6	0.165	0.33	18.641	56.317
Con	2	RHL_homolat	0.454545	0.545455	0.15	0.315	19.778	62.8128
Con	2	RHL_homolat	0.666667	0.666667	0.15	0.31	15.7771	51.1351
Con	2	RHL_homolat	0.628571	0.628571	0.205	0.35	13.8344	39.5269
Con	7	RHL_homolat	0.485714	0.514286	0.205	0.38	18.5232	48.679
Con	7	RHL_homolat	0.53125	0.53125	0.16	0.32	18.2379	56.9936
Con	7	RHL_homolat	0.62963	0.62963	0.12	0.265	16.031	60.4201
Con	7	RHL_homolat	0.526316	0.526316	0.205	0.37	14.444	39.0169
Con	7	RHL_homolat	0.480769	0.519231	0.33	0.52	13.4773	25.918
Con	7	RHL_homolat	0.518519	0.518519	0.11	0.27	20.146	74.6147
Con	7	RHL_homolat	0.466667	0.533333	0.13	0.31	19.8068	63.8803
Con	8	RHL_homolat	0.62069	0.62069	0.145	0.315	18.0416	57.256
Con	8	RHL_homolat	0.53125	0.53125	0.125	0.285	20.7279	73.0813
Con	8	RHL_homolat	0.6	0.6	0.125	0.275	15.7435	52.4784
Con	8	RHL_homolat	0.48	0.52	0.105	0.255	21.3414	82.0988
Con	8	RHL_homolat	0.5	0.5	0.1	0.255	20.8452	85.0412
Con	9	RHL_homolat	0.444444	0.555556	0.11	0.26	21.0471	81.0857
Con	9	RHL_homolat	0.5	0.5	0.105	0.25	21.034	84.191
Con	9	RHL_homolat	0.5	0.5	0.08	0.21	22.5794	107.588
Con	9	RHL_homolat	0.52381	0.52381	0.07	0.21	22.5282	107.277
Con	9	RHL_homolat	0.5	0.5	0.07	0.21	23.1039	109.831
Con	9	RHL_homolat	0.459459	0.540541	0.205	0.375	15.9616	42.544
Con	9	RHL_homolat	0.708333	0.708333	0.13	0.24	11.6721	48.6337
Con	10	RHL_homolat	0.541667	0.541667	0.085	0.225	22.4124	99.9617
Con	10	RHL_homolat	0.590909	0.590909	0.1	0.23	17.6084	76.9145
Con	10	RHL_homolat	0.608696	0.608696	0.095	0.235	22.099	94.0445
Con	10	RHL_homolat	0.444444	0.555556	0.165	0.35	18.8976	54.0376
Con	12	RHL_homolat	0.555556	0.555556	0.12	0.28	20.4611	73.0925
Con	12	RHL_homolat	0.555556	0.555556	0.11	0.27	19.9672	73.9524
Con	12	RHL_homolat	0.551724	0.551724	0.105	0.28	20.537	73.4329
Con	12	RHL_homolat	0.533333	0.533333	0.145	0.31	18.8173	60.6777
Con	12	RHL_homolat	0.566667	0.566667	0.155	0.315	16.4545	52.1608
Con	12	RHL_homolat	0.517241	0.517241	0.12	0.29	20.0914	69.2806
Con	12	RHL_homolat	0.478261	0.521739	0.085	0.245	22.0819	90.315
Con	12	RHL_homolat	0.555556	0.555556	0.105	0.27	19.1402	70.8898
Con	12	RHL_homolat	0.5	0.5	0.14	0.31	17.8964	57.6304
Con	13	RHL_homolat	0.675676	0.675676	0.2	0.375	18.6193	49.6017
Con	13	RHL_homolat	0.595238	0.595238	0.21	0.42	18.3518	43.6949
Con	13	RHL_homolat	0.638298	0.638298	0.26	0.465	15.4256	33.1739
Con	13	RHL_homolat	0.5	0.5	0.115	0.28	22.2085	79.3162
Con	13	RHL_homolat	0.5	0.5	0.175	0.355	19.4549	54.7707
Con	13	RHL_homolat	0.483871	0.516129	0.135	0.29	20.2248	69.6924
Con	13	RHL_homolat	0.5	0.5	0.13	0.305	20.148	66.0584
Con	13	RHL_homolat	0.518519	0.518519	0.12	0.275	21.2962	77.4282
Con	13	RHL_homolat	0.521739	0.521739	0.085	0.235	22.2179	94.623
Con	13	RHL_homolat	0.5	0.5	0.195	0.37	18.4302	49.7641
Con	13	RHL_homolat	0.451613	0.548387	0.145	0.315	19.8935	63.18
Con	14	RHL_homolat	0.59375	0.59375	0.155	0.315	17.7106	56.1997
Con	14	RHL_homolat	0.684211	0.684211	0.195	0.37	15.0026	40.5648
Con	14	RHL_homolat	0.633333	0.633333	0.145	0.3	16.6546	55.5152
Con	14	RHL_homolat	0.65625	0.65625	0.16	0.32	16.5648	51.765
Con	14	RHL_homolat	0.541667	0.541667	0.095	0.235	21.5207	91.6362
Con	14	RHL_homolat	0.62963	0.62963	0.13	0.28	17.1627	61.3497
Con	14	RHL_homolat	0.611111	0.611111	0.165	0.34	16.3876	48.2718
Con	14	RHL_homolat	0.576923	0.576923	0.12	0.265	18.2965	68.9871
Con	14	RHL_homolat	0.5	0.5	0.12	0.28	19.8884	71.0301
Con	15	RHL_homolat	0.651163	0.651163	0.27	0.435	15.4905	35.608
Con	15	RHL_homolat	0.697674	0.697674	0.215	0.42	15.8977	37.8551
Con	15	RHL_homolat	0.651163	0.651163	0.255	0.425	15.7383	37.0263
Con	15	RHL_homolat	0.625	0.625	0.165	0.34	16.8657	49.546
Con	15	RHL_homolat	0.512195	0.512195	0.215	0.4	18.4036	46.0123
Con	15	RHL_homolat	0.607143	0.607143	0.13	0.295	19.76	66.8873
Con	15	RHL_homolat	0.6	0.6	0.125	0.3	20.4658	68.2193
Con	15	RHL_homolat	0.5	0.5	0.16	0.33	20.5929	62.3797
Con	15	RHL_homolat	0.533333	0.533333	0.135	0.305	18.7717	61.596
Con	15	RHL_homolat	0.535714	0.535714	0.125	0.275	19.5139	71.0043
Con	15	RHL_homolat	0.538462	0.538462	0.115	0.265	20.5484	77.5684
Con	16	RHL_homolat	0.6	0.6	0.125	0.3	20.0506	66.8355
Con	16	RHL_homolat	0.62069	0.62069	0.11	0.265	20.3026	76.9747
Con	16	RHL_homolat	0.75	0.75	0.125	0.275	16.3824	59.5991
Con	16	RHL_homolat	0.592593	0.592593	0.115	0.275	20.1729	73.382
Con	16	RHL_homolat	0.62069	0.62069	0.115	0.275	18.3369	66.623
Con	16	RHL_homolat	0.730769	0.730769	0.115	0.265	16.4092	61.9176
Con	16	RHL_homolat	0.674419	0.674419	0.215	0.435	13.7054	31.504
Con	16	RHL_homolat	0.592593	0.592593	0.11	0.265	20.6294	77.8646
Con	16	RHL_homolat	0.65625	0.65625	0.135	0.325	16.1876	49.8378
Con	17	RHL_homolat	0.5	0.5	0.155	0.335	19.4102	57.9452
Con	17	RHL_homolat	0.558824	0.558824	0.165	0.325	17.2767	53.1165
Con	17	RHL_homolat	0.5	0.5	0.11	0.27	20.1131	74.5487
Con	17	RHL_homolat	0.555556	0.555556	0.11	0.265	19.3549	73.0416
Con	17	RHL_homolat	0.483871	0.516129	0.135	0.32	17.8775	55.846
Con	17	RHL_homolat	0.5	0.5	0.155	0.34	17.8194	52.4101
Con	17	RHL_homolat	0.513514	0.513514	0.17	0.36	16.8896	46.8979
Con	17	RHL_homolat	0.541667	0.541667	0.085	0.235	19.4247	82.6766
Con	17	RHL_homolat	0.545455	0.545455	0.16	0.36	16.1033	44.9051
Con	17	RHL_homolat	0.405405	0.594595	0.16	0.345	17.4171	50.5616
Con	17	RHL_homolat	0.5	0.5	0.105	0.255	19.3617	75.9507
Con	17	RHL_homolat	0.482759	0.517241	0.12	0.285	20.0853	70.4843
Con	18	RHL_homolat	0.633333	0.633333	0.15	0.315	18.0146	57.1946
Con	18	RHL_homolat	0.659091	0.659091	0.21	0.415	14.163	34.1871
Con	18	RHL_homolat	0.7	0.7	0.275	0.46	12.2779	26.6111
Con	18	RHL_homolat	0.566667	0.566667	0.145	0.3	18.7336	62.4453
Con	18	RHL_homolat	0.607143	0.607143	0.12	0.29	17.8541	61.6271
Con	18	RHL_homolat	0.551724	0.551724	0.12	0.28	18.4712	66.0781
Con	18	RHL_homolat	0.5625	0.5625	0.155	0.31	18.1051	58.3723
Con	18	RHL_homolat	0.5	0.5	0.105	0.245	19.7753	80.6976
Con	18	RHL_homolat	0.52	0.52	0.105	0.24	19.6937	82.0478
Con	18	RHL_homolat	0.56	0.56	0.11	0.26	18.2656	70.2299
Con	18	RHL_homolat	0.551724	0.551724	0.125	0.285	18.1077	63.5149
Dox	1	RHL_homolat	0.580645	0.580645	0.145	0.315	19.6653	62.4412
Dox	1	RHL_homolat	0.6	0.6	0.145	0.3	17.6296	58.7652
Dox	1	RHL_homolat	0.551724	0.551724	0.13	0.29	20.2578	69.8545
Dox	1	RHL_homolat	0.48	0.52	0.125	0.27	20.0404	74.416
Dox	1	RHL_homolat	0.454545	0.545455	0.135	0.315	21.6635	68.7995
Dox	1	RHL_homolat	0.482759	0.517241	0.13	0.295	21.5323	73.0151
Dox	2	RHL_homolat	0.411765	0.588235	0.145	0.325	21.2375	65.4288
Dox	2	RHL_homolat	0.46875	0.53125	0.135	0.31	20.0066	64.4642
Dox	2	RHL_homolat	0.464286	0.535714	0.125	0.295	19.7144	67.0266
Dox	2	RHL_homolat	0.464286	0.535714	0.11	0.28	20.9771	74.918
Dox	2	RHL_homolat	0.444444	0.555556	0.11	0.27	21.8703	81.0011
Dox	2	RHL_homolat	0.461538	0.538462	0.1	0.26	21.0918	81.1223
Dox	2	RHL_homolat	0.416667	0.583333	0.095	0.24	21.591	89.9623
Dox	2	RHL_homolat	0.423077	0.576923	0.105	0.27	21.3183	79.0629
Dox	2	RHL_homolat	0.5	0.5	0.105	0.265	19.142	72.4351
Dox	7	RHL_homolat	0.482759	0.517241	0.15	0.3	16.3293	54.3577
Dox	7	RHL_homolat	0.46875	0.53125	0.15	0.31	18.376	59.3014
Dox	7	RHL_homolat	0.730769	0.730769	0.13	0.25	13.871	55.4553
Dox	7	RHL_homolat	0.461538	0.538462	0.11	0.265	18.9518	71.5211
Dox	7	RHL_homolat	0.580645	0.580645	0.135	0.29	16.4635	56.7858
Dox	7	RHL_homolat	0.484848	0.515152	0.16	0.325	16.547	50.9129
Dox	7	RHL_homolat	0.487179	0.512821	0.18	0.34	15.4826	45.5842
Dox	8	RHL_homolat	0.5625	0.5625	0.165	0.325	16.9839	52.271
Dox	8	RHL_homolat	0.594595	0.594595	0.2	0.37	15.5716	42.0855
Dox	8	RHL_homolat	0.53125	0.53125	0.135	0.305	18.9045	62.0084
Dox	8	RHL_homolat	0.592593	0.592593	0.115	0.275	18.1321	65.9528
Dox	8	RHL_homolat	0.535714	0.535714	0.12	0.29	18.8401	64.9919
Dox	8	RHL_homolat	0.484848	0.515152	0.135	0.31	17.9286	57.867
Dox	8	RHL_homolat	0.621622	0.621622	0.165	0.38	14.8326	39.0262
Dox	8	RHL_homolat	0.606061	0.606061	0.17	0.32	14.6027	45.6297
Dox	8	RHL_homolat	0.578947	0.578947	0.2	0.375	13.7082	36.5495
Dox	8	RHL_homolat	0.525	0.525	0.21	0.395	15.2538	38.6123
Dox	9	RHL_homolat	0.529412	0.529412	0.185	0.34	15.7404	46.2952
Dox	9	RHL_homolat	0.555556	0.555556	0.175	0.345	16.3256	47.3206
Dox	9	RHL_homolat	0.710526	0.710526	0.225	0.38	13.9438	36.6943
Dox	9	RHL_homolat	0.538462	0.538462	0.11	0.26	18.8634	72.5514
Dox	9	RHL_homolat	0.576923	0.576923	0.11	0.255	17.8177	69.8624
Dox	9	RHL_homolat	0.5	0.5	0.155	0.32	14.9727	46.812
Dox	9	RHL_homolat	0.454545	0.545455	0.14	0.315	16.5229	52.5984
Dox	9	RHL_homolat	0.6	0.6	0.165	0.315	14.3674	45.5931
Dox	9	RHL_homolat	0.6	0.6	0.15	0.295	16.4046	55.6049
Dox	9	RHL_homolat	0.555556	0.555556	0.125	0.27	16.5099	61.1476
Dox	10	RHL_homolat	0.53125	0.53125	0.15	0.305	17.8829	58.8025
Dox	10	RHL_homolat	0.592593	0.592593	0.135	0.28	18.1907	65.0676
Dox	10	RHL_homolat	0.518519	0.518519	0.135	0.285	17.9701	62.9606
Dox	10	RHL_homolat	0.517241	0.517241	0.12	0.275	19.0037	69.1313
Dox	10	RHL_homolat	0.545455	0.545455	0.095	0.235	20.105	85.8347
Dox	10	RHL_homolat	0.56	0.56	0.09	0.23	20.6451	89.9703
Dox	10	RHL_homolat	0.521739	0.521739	0.09	0.235	20.0973	85.4928
Dox	10	RHL_homolat	0.55	0.55	0.09	0.21	16.9319	80.8271
Dox	10	RHL_homolat	0.5	0.5	0.105	0.24	19.6322	81.801
Dox	10	RHL_homolat	0.590909	0.590909	0.09	0.22	17.7105	80.5022
Dox	10	RHL_homolat	0.47619	0.52381	0.095	0.23	18.6199	80.9533
Dox	10	RHL_homolat	0.434783	0.565217	0.105	0.23	17.7121	77.0092
Dox	12	RHL_homolat	0.555556	0.555556	0.12	0.265	19.551	73.8638
Dox	12	RHL_homolat	0.538462	0.538462	0.09	0.24	19.7266	82.1785
Dox	12	RHL_homolat	0.68	0.68	0.14	0.285	12.7038	44.519
Dox	12	RHL_homolat	0.470588	0.529412	0.145	0.295	15.4071	52.5871
Dox	12	RHL_homolat	0.5625	0.5625	0.135	0.3	16.7817	55.9591
Dox	12	RHL_homolat	0.7	0.7	0.13	0.3	12.0583	40.1942
Dox	13	RHL_homolat	0.571429	0.571429	0.16	0.305	17.1169	56.0805
Dox	13	RHL_homolat	0.5	0.5	0.12	0.285	21.2993	74.7855
Dox	13	RHL_homolat	0.516129	0.516129	0.155	0.31	18.451	59.5194
Dox	13	RHL_homolat	0.518519	0.518519	0.12	0.315	17.6639	56.6715
Dox	13	RHL_homolat	0.5	0.5	0.11	0.24	18.7143	78.9331
Dox	13	RHL_homolat	0.464286	0.535714	0.125	0.28	18.2958	65.3421
Dox	13	RHL_homolat	0.411765	0.588235	0.145	0.305	20.23	66.7367
Dox	13	RHL_homolat	0.529412	0.529412	0.175	0.355	14.5538	40.9827
Dox	13	RHL_homolat	0.533333	0.533333	0.165	0.31	16.8715	54.3808
Dox	14	RHL_homolat	0.53125	0.53125	0.16	0.32	17.9573	56.1166
Dox	14	RHL_homolat	0.62963	0.62963	0.12	0.265	18.5252	69.9241
Dox	14	RHL_homolat	0.625	0.625	0.115	0.255	16.9448	66.3637
Dox	14	RHL_homolat	0.518519	0.518519	0.1	0.255	20.9059	81.9938
Dox	14	RHL_homolat	0.55	0.55	0.085	0.22	20.3423	92.3985
Dox	14	RHL_homolat	0.52381	0.52381	0.07	0.22	21.9472	99.8191
Dox	14	RHL_homolat	0.56	0.56	0.11	0.26	19.2695	74.1648
Dox	14	RHL_homolat	0.625	0.625	0.1	0.23	18.5028	80.4046
Dox	14	RHL_homolat	0.558824	0.558824	0.195	0.335	15.0288	44.8983
Dox	14	RHL_homolat	0.607143	0.607143	0.145	0.29	17.919	61.7832
Dox	15	RHL_homolat	0.481481	0.518519	0.105	0.255	22.8198	89.646
Dox	15	RHL_homolat	0.565217	0.565217	0.095	0.235	20.562	87.5426
Dox	15	RHL_homolat	0.428571	0.571429	0.085	0.255	26.6834	104.456
Dox	15	RHL_homolat	0.478261	0.521739	0.085	0.235	21.9991	93.6935
Dox	15	RHL_homolat	0.483871	0.516129	0.12	0.27	17.8975	66.4038
Dox	15	RHL_homolat	0.484848	0.515152	0.205	0.365	14.3009	39.1642
Dox	15	RHL_homolat	0.473684	0.526316	0.065	0.205	20.6261	100.999
Dox	16	RHL_homolat	0.625	0.625	0.085	0.235	19.4259	82.6335
Dox	16	RHL_homolat	0.583333	0.583333	0.095	0.25	16.1834	64.745
Dox	16	RHL_homolat	0.535714	0.535714	0.115	0.29	17.3517	59.8152
Dox	16	RHL_homolat	0.580645	0.580645	0.115	0.3	15.141	50.4127
Dox	16	RHL_homolat	0.392857	0.607143	0.115	0.24	16.2529	67.325
Dox	16	RHL_homolat	0.392857	0.607143	0.12	0.255	18.6886	73.6792
Dox	16	RHL_homolat	0.607143	0.607143	0.115	0.27	15.6351	57.9407
Dox	16	RHL_homolat	0.586207	0.586207	0.135	0.29	17.346	59.8137
Dox	16	RHL_homolat	0.652174	0.652174	0.075	0.225	21.0841	93.6583
Dox	16	RHL_homolat	0.666667	0.666667	0.08	0.215	17.2489	80.226
Dox	17	RHL_homolat	0.551724	0.551724	0.13	0.29	18.4566	63.6434
Dox	17	RHL_homolat	0.555556	0.555556	0.115	0.27	18.6189	68.959
Dox	17	RHL_homolat	0.4375	0.5625	0.18	0.365	13.183	36.9371
Dox	17	RHL_homolat	0.487805	0.512195	0.23	0.365	13.0082	36.4605
Dox	17	RHL_homolat	0.52381	0.52381	0.075	0.2	20.6056	103.348
Dox	17	RHL_homolat	0.541667	0.541667	0.065	0.22	21.9506	99.7259
Dox	17	RHL_homolat	0.451613	0.548387	0.11	0.285	18.7864	66.3347
Dox	17	RHL_homolat	0.56	0.56	0.1	0.265	17.8559	67.641
Dox	18	RHL_homolat	0.565217	0.565217	0.075	0.225	21.6855	96.4165
Dox	18	RHL_homolat	0.666667	0.666667	0.08	0.22	19.6901	89.587
Dox	18	RHL_homolat	0.55	0.55	0.07	0.195	22.5404	115.467
Dox	18	RHL_homolat	0.611111	0.611111	0.07	0.205	21.3194	103.786
Dox	18	RHL_homolat	0.733333	0.733333	0.19	0.33	12.967	39.194
Dox	18	RHL_homolat	0.702703	0.702703	0.215	0.365	11.6966	32.0383
Dox	18	RHL_homolat	0.657143	0.657143	0.205	0.38	12.3631	32.5731
Dox	18	RHL_homolat	0.657895	0.657895	0.21	0.37	12.0554	32.6043
Dox	18	RHL_homolat	0.617647	0.617647	0.215	0.375	14.8321	39.5884
Dox	18	RHL_homolat	0.6875	0.6875	0.16	0.32	16.1245	50.389
Dox	18	RHL_homolat	0.45	0.55	0.065	0.21	22.5286	107.28
Dox	1	RHL_homolat	0.0606061	0.939394	0.17	0.33	18.0616	54.732
Dox	1	RHL_homolat	0.0357143	0.964286	0.13	0.285	18.5234	65.0163
Dox	1	RHL_homolat	0.5625	0.5625	0.175	0.315	16.7198	53.1959
Dox	1	RHL_homolat	0.518519	0.518519	0.135	0.28	17.3749	62.2603
Dox	1	RHL_homolat	0.548387	0.548387	0.155	0.315	18.4624	58.6358
Dox	1	RHL_homolat	0.515152	0.515152	0.155	0.33	18.2918	55.4296
Dox	1	RHL_homolat	0.545455	0.545455	0.175	0.335	16.9034	50.4306
Dox	1	RHL_homolat	0.515152	0.515152	0.16	0.32	16.7253	52.1996
Dox	1	RHL_homolat	0.551724	0.551724	0.135	0.29	19.0858	65.813
Dox	1	RHL_homolat	0.62069	0.62069	0.13	0.28	17.2338	61.6643
Dox	2	RHL_homolat	0.551724	0.551724	0.14	0.3	19.6976	65.6576
Dox	2	RHL_homolat	0.435897	0.564103	0.22	0.405	16.0223	39.6023
Dox	2	RHL_homolat	0.5	0.5	0.17	0.34	19.0797	56.1169
Dox	2	RHL_homolat	0.485714	0.514286	0.18	0.365	15.4649	42.6932
Dox	2	RHL_homolat	0.487805	0.512195	0.22	0.405	13.5214	33.3854
Dox	2	RHL_homolat	0.542857	0.542857	0.165	0.325	15.6987	48.5216
Dox	2	RHL_homolat	0.592593	0.592593	0.14	0.285	15.6005	54.8045
Dox	2	RHL_homolat	0.485714	0.514286	0.2	0.385	18.6226	48.6119
Dox	2	RHL_homolat	0.428571	0.571429	0.2	0.415	17.4105	41.9674
Dox	7	RHL_homolat	0.516129	0.516129	0.145	0.295	17.2376	58.5617
Dox	7	RHL_homolat	0.482759	0.517241	0.135	0.3	18.8268	62.8253
Dox	7	RHL_homolat	0.648649	0.648649	0.24	0.44	13.645	30.9168
Dox	7	RHL_homolat	0.382353	0.617647	0.16	0.31	18.3787	59.5289
Dox	7	RHL_homolat	0.604651	0.604651	0.24	0.405	12.3239	30.4705
Dox	7	RHL_homolat	0.564103	0.564103	0.235	0.365	11.6531	32.1648
Dox	7	RHL_homolat	0.594595	0.594595	0.215	0.37	11.6307	31.4343
Dox	7	RHL_homolat	0.540541	0.540541	0.215	0.375	13.2519	35.3398
Dox	7	RHL_homolat	0.617647	0.617647	0.18	0.32	12.3363	38.7418
Dox	7	RHL_homolat	0.461538	0.538462	0.12	0.265	17.5951	66.437
Dox	7	RHL_homolat	0.533333	0.533333	0.14	0.285	14.6064	51.1761
Dox	8	RHL_homolat	0.675676	0.675676	0.19	0.365	13.2016	36.1692
Dox	8	RHL_homolat	0.548387	0.548387	0.17	0.315	16.8103	53.3994
Dox	8	RHL_homolat	0.565217	0.565217	0.105	0.24	18.6805	77.9364
Dox	8	RHL_homolat	0.592593	0.592593	0.11	0.26	17.5332	67.5107
Dox	8	RHL_homolat	0.645161	0.645161	0.125	0.285	15.4403	54.827
Dox	8	RHL_homolat	0.607143	0.607143	0.14	0.28	14.7273	52.5974
Dox	8	RHL_homolat	0.571429	0.571429	0.165	0.325	12.2577	37.6321
Dox	8	RHL_homolat	0.454545	0.545455	0.195	0.35	16.6922	47.6435
Dox	8	RHL_homolat	0.46875	0.53125	0.15	0.305	17.1455	56.1826
Dox	9	RHL_homolat	0.518519	0.518519	0.11	0.265	19.2299	72.5521
Dox	9	RHL_homolat	0.56	0.56	0.095	0.24	17.9499	74.8397
Dox	9	RHL_homolat	0.55	0.55	0.08	0.2	19.3299	96.6493
Dox	9	RHL_homolat	0.52381	0.52381	0.085	0.205	15.4831	75.3746
Dox	9	RHL_homolat	0.45	0.55	0.085	0.19	16.7073	87.745
Dox	9	RHL_homolat	0.545455	0.545455	0.1	0.225	15.1729	67.427
Dox	9	RHL_homolat	0.481481	0.518519	0.13	0.25	15.1393	60.6714
Dox	9	RHL_homolat	0.482759	0.517241	0.145	0.27	14.8168	55.092
Dox	9	RHL_homolat	0.5	0.5	0.145	0.285	17.6088	61.8542
Dox	10	RHL_homolat	0.583333	0.583333	0.105	0.24	19.0956	79.5651
Dox	10	RHL_homolat	0.583333	0.583333	0.11	0.25	20.0107	80.0958
Dox	10	RHL_homolat	0.5	0.5	0.12	0.285	18.7037	65.6392
Dox	10	RHL_homolat	0.542857	0.542857	0.16	0.325	17.2595	53.1586
Dox	10	RHL_homolat	0.7	0.7	0.095	0.23	18.392	80.5184
Dox	10	RHL_homolat	0.590909	0.590909	0.085	0.215	20.2581	94.1663
Dox	10	RHL_homolat	0.666667	0.666667	0.07	0.18	18.9068	105.038
Dox	10	RHL_homolat	0.571429	0.571429	0.08	0.205	19.5621	95.4145
Dox	10	RHL_homolat	0.404762	0.595238	0.235	0.4	17.5952	44.232
Dox	10	RHL_homolat	0.555556	0.555556	0.11	0.27	19.2249	71.2034
Dox	12	RHL_homolat	0.541667	0.541667	0.1	0.235	19.2418	81.8686
Dox	12	RHL_homolat	0.625	0.625	0.095	0.23	15.848	68.8125
Dox	12	RHL_homolat	0.6	0.6	0.16	0.33	15.4834	46.9527
Dox	12	RHL_homolat	0.55	0.55	0.225	0.4	15.1429	37.8573
Dox	12	RHL_homolat	0.611111	0.611111	0.205	0.36	12.7991	35.553
Dox	12	RHL_homolat	0.555556	0.555556	0.19	0.38	13.9506	36.8525
Dox	12	RHL_homolat	0.560976	0.560976	0.205	0.39	12.3792	31.6556
Dox	12	RHL_homolat	0.6	0.6	0.08	0.22	18.5412	84.5151
Dox	12	RHL_homolat	0.56	0.56	0.09	0.235	17.558	74.6144
Dox	13	RHL_homolat	0.583333	0.583333	0.11	0.26	17.3119	66.7126
Dox	13	RHL_homolat	0.576923	0.576923	0.105	0.255	17.4202	68.3695
Dox	13	RHL_homolat	0.590909	0.590909	0.085	0.225	17.1293	76.1653
Dox	13	RHL_homolat	0.6	0.6	0.105	0.24	16.8623	70.2806
Dox	13	RHL_homolat	0.631579	0.631579	0.07	0.19	18.4258	96.9778
Dox	14	RHL_homolat	0.612903	0.612903	0.145	0.29	16.8342	58.245
Dox	14	RHL_homolat	0.606061	0.606061	0.165	0.315	15.9257	50.6195
Dox	14	RHL_homolat	0.56	0.56	0.09	0.245	19.9697	81.5149
Dox	14	RHL_homolat	0.651163	0.651163	0.245	0.415	13.713	33.2812
Dox	14	RHL_homolat	0.526316	0.526316	0.2	0.325	13.9101	43.5796
Dox	14	RHL_homolat	0.545455	0.545455	0.085	0.225	19.0404	84.7065
Dox	14	RHL_homolat	0.583333	0.583333	0.09	0.24	17.9842	74.9341
Dox	14	RHL_homolat	0.653846	0.653846	0.095	0.255	15.182	59.4425
Dox	15	RHL_homolat	0.518519	0.518519	0.1	0.26	21.9633	84.5856
Dox	15	RHL_homolat	0.608696	0.608696	0.095	0.23	17.7179	77.0343
Dox	15	RHL_homolat	0.47619	0.52381	0.08	0.215	20.7743	96.5456
Dox	15	RHL_homolat	0.47619	0.52381	0.085	0.205	18.8084	91.6765
Dox	15	RHL_homolat	0.5	0.5	0.115	0.24	15.8746	66.1443
Dox	15	RHL_homolat	0.484848	0.515152	0.18	0.33	17.9513	54.398
Dox	15	RHL_homolat	0.0666667	0.933333	0.165	0.25	8.13896	23.2975
Dox	15	RHL_homolat	0.722222	0.722222	0.085	0.19	17.1815	90.1723
Dox	15	RHL_homolat	0.545455	0.545455	0.085	0.215	20.6774	96.1334
Dox	16	RHL_homolat	0.535714	0.535714	0.125	0.285	20.0179	70.2148
Dox	16	RHL_homolat	0.642857	0.642857	0.125	0.275	17.9269	65.1724
Dox	16	RHL_homolat	0.6	0.6	0.145	0.285	13.7836	48.3508
Dox	16	RHL_homolat	0.615385	0.615385	0.11	0.27	19.8681	73.6093
Dox	16	RHL_homolat	0.576923	0.576923	0.095	0.25	20.0047	79.9972
Dox	16	RHL_homolat	0.684211	0.684211	0.085	0.21	17.999	85.1101
Dox	16	RHL_homolat	0.444444	0.555556	0.08	0.23	22.4661	97.0512
Dox	17	RHL_homolat	0.548387	0.548387	0.155	0.315	17.4573	55.4138
Dox	17	RHL_homolat	0.5	0.5	0.14	0.3	19.7205	65.7349
Dox	17	RHL_homolat	0.52	0.52	0.085	0.235	21.5792	91.968
Dox	17	RHL_homolat	0.5	0.5	0.105	0.27	20.9785	77.7459
Dox	17	RHL_homolat	0.56	0.56	0.1	0.25	19.1007	76.4029
Dox	17	RHL_homolat	0.428571	0.571429	0.105	0.26	21.1165	81.5495
Dox	17	RHL_homolat	0.545455	0.545455	0.08	0.2	19.1491	95.9286
Dox	17	RHL_homolat	0.619048	0.619048	0.075	0.205	19.8403	96.8022
Dox	18	RHL_homolat	0.545455	0.545455	0.095	0.225	20.5719	91.4272
Dox	18	RHL_homolat	0.538462	0.538462	0.095	0.24	19.2851	80.2327
Dox	18	RHL_homolat	0.538462	0.538462	0.115	0.26	18.6721	71.8159
Dox	18	RHL_homolat	0.666667	0.666667	0.11	0.24	16.1693	67.3721
Dox	18	RHL_homolat	0.56	0.56	0.1	0.25	19.6373	78.5491
Dox	18	RHL_homolat	0.56	0.56	0.1	0.24	17.8551	74.3432
Dox	18	RHL_homolat	0.52381	0.52381	0.085	0.22	20.9766	95.4307
Dox	18	RHL_homolat	0.545455	0.545455	0.075	0.215	21.1532	98.3676
Dox	18	RHL_homolat	0.578947	0.578947	0.065	0.19	22.8698	120.367
Dox	1	RHL_homolat	0.5	0.5	0.17	0.34	19.902	58.5354
Dox	1	RHL_homolat	0.5	0.5	0.16	0.33	21.5843	65.5756
Dox	1	RHL_homolat	0.516129	0.516129	0.165	0.325	20.5097	63.1638
Dox	1	RHL_homolat	0.540541	0.540541	0.165	0.35	18.503	52.9894
Dox	1	RHL_homolat	0.529412	0.529412	0.175	0.355	18.8383	53.1444
Dox	1	RHL_homolat	0.548387	0.548387	0.145	0.315	20.8591	66.2312
Dox	1	RHL_homolat	0.511628	0.511628	0.195	0.41	19.6932	48.1474
Dox	1	RHL_homolat	0.52381	0.52381	0.23	0.42	14.9117	35.5039
Dox	1	RHL_homolat	0.511628	0.511628	0.225	0.43	18.027	41.9232
Dox	2	RHL_homolat	0.56	0.56	0.115	0.255	16.8947	66.3619
Dox	2	RHL_homolat	0.625	0.625	0.18	0.34	16.6053	48.9025
Dox	2	RHL_homolat	0.444444	0.555556	0.105	0.26	20.7874	80.0174
Dox	2	RHL_homolat	0.5	0.5	0.115	0.26	17.8319	68.5843
Dox	2	RHL_homolat	0.518519	0.518519	0.12	0.28	16.9188	60.611
Dox	2	RHL_homolat	0.366667	0.633333	0.105	0.26	20.3526	79.8713
Dox	2	RHL_homolat	0.521739	0.521739	0.09	0.225	19.1833	85.1792
Dox	7	RHL_homolat	0.571429	0.571429	0.14	0.295	17.2693	58.5471
Dox	7	RHL_homolat	0.517241	0.517241	0.13	0.29	17.6237	60.7715
Dox	7	RHL_homolat	0.534884	0.534884	0.245	0.405	13.3313	33.0969
Dox	7	RHL_homolat	0.513514	0.513514	0.205	0.37	15.1279	40.8863
Dox	7	RHL_homolat	0.567568	0.567568	0.21	0.365	13.6332	37.3228
Dox	7	RHL_homolat	0.606061	0.606061	0.185	0.335	12.552	37.4564
Dox	7	RHL_homolat	0.472222	0.527778	0.2	0.35	14.3368	40.9403
Dox	7	RHL_homolat	0.416667	0.583333	0.18	0.36	16.9602	47.1116
Dox	8	RHL_homolat	0.525	0.525	0.17	0.37	16.2356	43.8422
Dox	8	RHL_homolat	0.6	0.6	0.185	0.345	13.9304	40.3961
Dox	8	RHL_homolat	0.464286	0.535714	0.105	0.265	21.1733	79.9358
Dox	8	RHL_homolat	0.59375	0.59375	0.16	0.33	14.6698	44.4756
Dox	8	RHL_homolat	0.461538	0.538462	0.225	0.385	15.2051	39.4846
Dox	8	RHL_homolat	0.581395	0.581395	0.25	0.405	11.7156	28.9196
Dox	8	RHL_homolat	0.555556	0.555556	0.2	0.38	15.5628	40.9118
Dox	8	RHL_homolat	0.512821	0.512821	0.195	0.38	14.6359	38.4149
Dox	8	RHL_homolat	0.514286	0.514286	0.185	0.345	14.6604	42.4934
Dox	8	RHL_homolat	0.516129	0.516129	0.155	0.31	17.6905	57.0662
Dox	9	RHL_homolat	0.6	0.6	0.115	0.25	17.0844	68.3374
Dox	9	RHL_homolat	0.535714	0.535714	0.125	0.28	17.886	63.8786
Dox	9	RHL_homolat	0.466667	0.533333	0.06	0.17	18.3417	108.879
Dox	9	RHL_homolat	0.473684	0.526316	0.08	0.185	16.3593	88.2906
Dox	9	RHL_homolat	0.428571	0.571429	0.08	0.2	17.8875	89.6114
Dox	9	RHL_homolat	0.555556	0.555556	0.14	0.28	15.8059	56.4517
Dox	9	RHL_homolat	0.62069	0.62069	0.135	0.295	15.7178	53.2751
Dox	9	RHL_homolat	0.411765	0.588235	0.075	0.175	17.1798	98.3646
Dox	10	RHL_homolat	0.52	0.52	0.085	0.235	21.8612	93.2596
Dox	10	RHL_homolat	0.583333	0.583333	0.085	0.22	18.2577	79.2941
Dox	10	RHL_homolat	0.684211	0.684211	0.065	0.195	19.3112	101.638
Dox	12	RHL_homolat	0.55	0.55	0.07	0.2	20.1377	100.689
Dox	12	RHL_homolat	0.538462	0.538462	0.1	0.25	19.643	78.686
Dox	12	RHL_homolat	0.608696	0.608696	0.1	0.245	18.1153	74.16
Dox	12	RHL_homolat	0.458333	0.541667	0.095	0.24	19.8569	82.737
Dox	12	RHL_homolat	0.434783	0.565217	0.09	0.23	20.3343	88.4101
Dox	12	RHL_homolat	0.611111	0.611111	0.205	0.365	14.3011	39.1471
Dox	12	RHL_homolat	0.62069	0.62069	0.15	0.295	14.9872	50.8215
Dox	12	RHL_homolat	0.681818	0.681818	0.28	0.44	11.3165	25.7193
Dox	12	RHL_homolat	0.609756	0.609756	0.215	0.405	14.6287	36.1121
Dox	13	RHL_homolat	0.448276	0.551724	0.13	0.295	18.6117	63.0668
Dox	13	RHL_homolat	0.5	0.5	0.11	0.265	20.6531	77.8933
Dox	13	RHL_homolat	0.692308	0.692308	0.27	0.465	14.2812	31.4037
Dox	13	RHL_homolat	0.647059	0.647059	0.335	0.5	13.384	26.8302
Dox	13	RHL_homolat	0.551724	0.551724	0.165	0.325	17.8119	55.1731
Dox	13	RHL_homolat	0.538462	0.538462	0.21	0.37	16.5464	44.8424
Dox	13	RHL_homolat	0.612903	0.612903	0.145	0.33	13.8895	42.394
Dox	14	RHL_homolat	0.6	0.6	0.125	0.265	17.9297	67.6587
Dox	14	RHL_homolat	0.592593	0.592593	0.115	0.265	19.0591	71.9428
Dox	14	RHL_homolat	0.454545	0.545455	0.09	0.22	21.7394	98.8155
Dox	14	RHL_homolat	0.517241	0.517241	0.145	0.3	18.7899	62.6326
Dox	14	RHL_homolat	0.464286	0.535714	0.115	0.275	19.5142	70.9578
Dox	14	RHL_homolat	0.482759	0.517241	0.12	0.275	20.2854	74.0438
Dox	14	RHL_homolat	0.590909	0.590909	0.085	0.23	20.9156	91.1175
Dox	14	RHL_homolat	0.555556	0.555556	0.125	0.27	17.7057	65.5765
Dox	14	RHL_homolat	0.576923	0.576923	0.125	0.26	17.1379	65.9151
Dox	15	RHL_homolat	0.521739	0.521739	0.1	0.245	20.4371	83.4124
Dox	15	RHL_homolat	0.5	0.5	0.1	0.25	20.1564	80.5841
Dox	15	RHL_homolat	0.409091	0.590909	0.065	0.225	27.1241	120.637
Dox	15	RHL_homolat	0.47619	0.52381	0.06	0.2	25.9741	130.109
Dox	15	RHL_homolat	0.56	0.56	0.11	0.27	18.8857	70.0866
Dox	15	RHL_homolat	0.5	0.5	0.1	0.26	18.6981	72.1267
Dox	15	RHL_homolat	0.52	0.52	0.095	0.24	20.0601	83.6559
Dox	15	RHL_homolat	0.681818	0.681818	0.085	0.22	16.5179	75.0812
Dox	15	RHL_homolat	0.32	0.68	0.085	0.24	24.5677	102.135
Dox	16	RHL_homolat	0.590909	0.590909	0.085	0.23	21.7184	94.5074
Dox	16	RHL_homolat	0.56	0.56	0.08	0.235	21.6082	92.0922
Dox	16	RHL_homolat	0.583333	0.583333	0.085	0.235	20.7617	88.3449
Dox	16	RHL_homolat	0.68	0.68	0.095	0.245	17.6342	71.9572
Dox	16	RHL_homolat	0.685714	0.685714	0.195	0.34	13.173	38.7827
Dox	16	RHL_homolat	0.657143	0.657143	0.195	0.355	14.8973	41.9625
Dox	16	RHL_homolat	0.617647	0.617647	0.17	0.335	17.1003	51.0321
Dox	16	RHL_homolat	0.695652	0.695652	0.245	0.52	14.978	28.7525
Dox	16	RHL_homolat	0.485714	0.514286	0.16	0.32	17.906	56.0164
Dox	17	RHL_homolat	0.541667	0.541667	0.085	0.235	20.8922	88.9332
Dox	17	RHL_homolat	0.5	0.5	0.09	0.245	22.1521	90.6505
Dox	17	RHL_homolat	0.45	0.55	0.075	0.205	21.9624	107.189
Dox	17	RHL_homolat	0.485714	0.514286	0.175	0.345	18.2538	52.9164
Dox	17	RHL_homolat	0.53125	0.53125	0.135	0.305	17.5982	57.7167
Dox	17	RHL_homolat	0.571429	0.571429	0.08	0.22	20.2399	92.1071
Dox	17	RHL_homolat	0.464286	0.535714	0.105	0.265	19.7726	74.7749
Dox	17	RHL_homolat	0.5	0.5	0.095	0.25	20.8129	83.2721
Dox	18	RHL_homolat	0.592593	0.592593	0.125	0.275	18.5119	67.298
Dox	18	RHL_homolat	0.625	0.625	0.105	0.245	19.7305	80.5617
Dox	18	RHL_homolat	0.52381	0.52381	0.075	0.215	21.6606	100.732
Dox	18	RHL_homolat	0.52381	0.52381	0.07	0.205	19.9653	97.3841
Dox	18	RHL_homolat	0.631579	0.631579	0.08	0.21	20.0731	95.5139
Dox	18	RHL_homolat	0.5	0.5	0.075	0.205	22.5825	110.271
Dox	18	RHL_homolat	0.64	0.64	0.105	0.255	18.1609	71.211
Dox	18	RHL_homolat	0.590909	0.590909	0.075	0.215	19.5068	90.8024
Dox	18	RHL_homolat	0.684211	0.684211	0.065	0.19	20.8791	109.89
Dox	1	RHL_homolat	0.484848	0.515152	0.15	0.335	20.652	61.6534
Dox	1	RHL_homolat	0.5	0.5	0.205	0.405	17.1298	43.3213
Dox	1	RHL_homolat	0.5	0.5	0.135	0.315	19.673	60.5898
Dox	2	RHL_homolat	0.517241	0.517241	0.145	0.295	19.4042	65.7799
Dox	2	RHL_homolat	0.535714	0.535714	0.125	0.275	19.3598	70.5139
Dox	2	RHL_homolat	0.52	0.52	0.105	0.27	18.8097	70.1995
Dox	2	RHL_homolat	0.515152	0.515152	0.15	0.31	15.1903	48.6802
Dox	2	RHL_homolat	0.5	0.5	0.15	0.34	16.697	49.1089
Dox	2	RHL_homolat	0.444444	0.555556	0.165	0.365	19.3949	53.1657
Dox	2	RHL_homolat	0.5625	0.5625	0.135	0.305	17.365	57.1276
Dox	7	RHL_homolat	0.538462	0.538462	0.12	0.28	19.1472	68.5816
Dox	7	RHL_homolat	0.606061	0.606061	0.17	0.32	14.1185	44.1576
Dox	7	RHL_homolat	0.586207	0.586207	0.155	0.3	15.3364	51.0977
Dox	7	RHL_homolat	0.612903	0.612903	0.145	0.3	15.3672	51.2038
Dox	7	RHL_homolat	0.375	0.625	0.265	0.46	17.1402	37.3735
Dox	7	RHL_homolat	0.441176	0.558824	0.155	0.335	18.5395	55.3506
Dox	7	RHL_homolat	0.571429	0.571429	0.115	0.27	19.0328	70.5165
Dox	7	RHL_homolat	0.56	0.56	0.1	0.25	18.4762	73.9047
Dox	7	RHL_homolat	0.52	0.52	0.085	0.24	21.73	90.4006
Dox	7	RHL_homolat	0.636364	0.636364	0.09	0.225	17.3076	76.958
Dox	8	RHL_homolat	0.466667	0.533333	0.125	0.305	19.1959	62.9129
Dox	8	RHL_homolat	0.516129	0.516129	0.125	0.285	19.4712	68.3555
Dox	8	RHL_homolat	0.5	0.5	0.1	0.255	20.4289	80.1633
Dox	8	RHL_homolat	0.482759	0.517241	0.135	0.3	18.6384	62.1382
Dox	8	RHL_homolat	0.606061	0.606061	0.145	0.31	15.608	50.3564
Dox	8	RHL_homolat	0.5	0.5	0.125	0.275	18.1206	65.8834
Dox	8	RHL_homolat	0.52	0.52	0.1	0.25	18.1713	72.6853
Dox	8	RHL_homolat	0.48	0.52	0.1	0.245	19.2798	78.7071
Dox	8	RHL_homolat	0.5	0.5	0.085	0.23	19.8219	86.2864
Dox	9	RHL_homolat	0.52	0.52	0.08	0.23	22.5735	98.1993
Dox	9	RHL_homolat	0.565217	0.565217	0.1	0.24	19.5095	81.3922
Dox	9	RHL_homolat	0.5	0.5	0.07	0.195	25.0078	128.283
Dox	9	RHL_homolat	0.517241	0.517241	0.12	0.335	15.3755	46.1368
Dox	9	RHL_homolat	0.571429	0.571429	0.075	0.215	22.9423	106.843
Dox	9	RHL_homolat	0.451613	0.548387	0.145	0.28	16.97	60.315
Dox	9	RHL_homolat	0.608696	0.608696	0.105	0.23	18.5151	80.5004
Dox	9	RHL_homolat	0.677419	0.677419	0.17	0.31	15.1266	48.7956
Dox	9	RHL_homolat	0.55	0.55	0.065	0.19	20.78	109.468
Dox	9	RHL_homolat	0.526316	0.526316	0.165	0.365	14.9234	40.8218
Dox	10	RHL_homolat	0.545455	0.545455	0.075	0.205	21.9873	107.936
Dox	10	RHL_homolat	0.45	0.55	0.095	0.2	15.8977	79.4887
Dox	10	RHL_homolat	0.45	0.55	0.09	0.2	17.774	88.8702
Dox	10	RHL_homolat	0.5	0.5	0.105	0.24	20.0093	83.3719
Dox	10	RHL_homolat	0.446809	0.553191	0.21	0.35	14.5034	45.2216
Dox	10	RHL_homolat	0.5	0.5	0.06	0.18	25.967	144.261
Dox	10	RHL_homolat	0.45	0.55	0.075	0.195	25.8153	132.222
Dox	10	RHL_homolat	0.666667	0.666667	0.06	0.17	23.6002	139.261
Dox	10	RHL_homolat	0.625	0.625	0.09	0.245	17.0934	69.7677
Dox	10	RHL_homolat	0.533333	0.533333	0.155	0.295	14.2807	48.428
Dox	12	RHL_homolat	0.689655	0.689655	0.145	0.295	16.379	55.4892
Dox	12	RHL_homolat	0.538462	0.538462	0.105	0.265	21.0888	79.5642
Dox	12	RHL_homolat	0.5	0.5	0.09	0.25	21.3574	85.6517
Dox	12	RHL_homolat	0.521739	0.521739	0.085	0.23	21.7458	94.5469
Dox	12	RHL_homolat	0.545455	0.545455	0.075	0.225	20.7884	92.4414
Dox	12	RHL_homolat	0.56	0.56	0.1	0.255	20.1366	78.9451
Dox	12	RHL_homolat	0.478261	0.521739	0.085	0.23	23.5932	102.579
Dox	12	RHL_homolat	0.380952	0.619048	0.075	0.205	21.8391	106.518
Dox	12	RHL_homolat	0.458333	0.541667	0.08	0.235	22.9455	97.6108
Dox	13	RHL_homolat	0.5	0.5	0.105	0.265	23.3011	88.0642
Dox	13	RHL_homolat	0.428571	0.571429	0.11	0.28	22.5909	80.6819
Dox	13	RHL_homolat	0.416667	0.583333	0.18	0.35	17.4993	50.0933
Dox	13	RHL_homolat	0.424242	0.575758	0.155	0.325	20.8971	64.2949
Dox	13	RHL_homolat	0.5	0.5	0.115	0.275	21.239	77.2506
Dox	13	RHL_homolat	0.428571	0.571429	0.125	0.29	22.0982	76.1958
Dox	13	RHL_homolat	0.518519	0.518519	0.09	0.255	20.8142	81.6881
Dox	13	RHL_homolat	0.555556	0.555556	0.225	0.42	16.5698	39.4785
Dox	13	RHL_homolat	0.486486	0.513514	0.21	0.395	18.941	47.9987
Dox	13	RHL_homolat	0.428571	0.571429	0.1	0.275	22.2417	80.8393
Dox	14	RHL_homolat	0.642857	0.642857	0.145	0.28	16.7886	59.9594
Dox	14	RHL_homolat	0.606061	0.606061	0.17	0.33	17.0627	51.7051
Dox	14	RHL_homolat	0.607143	0.607143	0.13	0.29	17.7969	61.3159
Dox	14	RHL_homolat	0.571429	0.571429	0.115	0.275	19.5032	70.924
Dox	14	RHL_homolat	0.517241	0.517241	0.12	0.28	20.5282	73.463
Dox	14	RHL_homolat	0.633333	0.633333	0.125	0.3	16.7172	55.7241
Dox	14	RHL_homolat	0.481481	0.518519	0.12	0.265	18.383	69.3575
Dox	14	RHL_homolat	0.533333	0.533333	0.14	0.29	18.706	64.5751
Dox	14	RHL_homolat	0.666667	0.666667	0.265	0.445	14.5989	32.7145
Dox	14	RHL_homolat	0.520833	0.520833	0.265	0.435	15.0399	34.8286
Dox	15	RHL_homolat	0.517241	0.517241	0.125	0.285	19.1591	67.1974
Dox	15	RHL_homolat	0.484848	0.515152	0.16	0.33	20.108	60.9332
Dox	15	RHL_homolat	0.5	0.5	0.15	0.325	20.0114	61.5788
Dox	15	RHL_homolat	0.571429	0.571429	0.07	0.205	21.0384	102.602
Dox	15	RHL_homolat	0.470588	0.529412	0.145	0.335	18.6038	55.5308
Dox	15	RHL_homolat	0.4375	0.5625	0.12	0.305	20.7518	68.1438
Dox	16	RHL_homolat	0.655172	0.655172	0.14	0.305	17.2488	56.5964
Dox	16	RHL_homolat	0.6	0.6	0.165	0.33	17.4702	53.0493
Dox	16	RHL_homolat	0.571429	0.571429	0.12	0.275	20.3355	73.9522
Dox	16	RHL_homolat	0.62963	0.62963	0.115	0.275	19.27	70.076
Dox	16	RHL_homolat	0.65625	0.65625	0.135	0.31	18.0354	58.1735
Dox	16	RHL_homolat	0.53125	0.53125	0.13	0.325	20.4135	62.7865
Dox	16	RHL_homolat	0.590909	0.590909	0.08	0.23	20.8818	90.6794
Dox	16	RHL_homolat	0.6	0.6	0.11	0.28	19.3467	69.1042
Dox	16	RHL_homolat	0.75	0.75	0.155	0.3	14.4847	48.2174
Dox	17	RHL_homolat	0.470588	0.529412	0.135	0.315	20.4624	65.318
Dox	17	RHL_homolat	0.575758	0.575758	0.135	0.315	18.4687	58.6071
Dox	17	RHL_homolat	0.628571	0.628571	0.14	0.35	17.0839	48.811
Dox	17	RHL_homolat	0.580645	0.580645	0.13	0.32	18.6372	58.2845
Dox	17	RHL_homolat	0.517241	0.517241	0.12	0.29	20.2243	69.739
Dox	17	RHL_homolat	0.413793	0.586207	0.125	0.295	19.943	67.5904
Dox	17	RHL_homolat	0.482759	0.517241	0.095	0.27	21.4331	79.5026
Dox	17	RHL_homolat	0.513514	0.513514	0.185	0.365	16.689	45.7466
Dox	17	RHL_homolat	0.513514	0.513514	0.165	0.34	17.3528	51.7154
Dox	18	RHL_homolat	0.538462	0.538462	0.115	0.265	19.9795	75.3561
Dox	18	RHL_homolat	0.551724	0.551724	0.125	0.28	18.7493	66.9487
Dox	18	RHL_homolat	0.571429	0.571429	0.075	0.21	21.1882	100.896
Dox	18	RHL_homolat	0.652174	0.652174	0.08	0.235	19.9035	84.6375
Dox	18	RHL_homolat	0.580645	0.580645	0.15	0.315	18.1292	57.529
Dox	18	RHL_homolat	0.53125	0.53125	0.15	0.32	18.32	57.25
Dox	18	RHL_homolat	0.55	0.55	0.065	0.2	22.2706	111.353
Dox	18	RHL_homolat	0.541667	0.541667	0.09	0.235	19.9247	84.8555
Dox	18	RHL_homolat	0.56	0.56	0.105	0.245	19.8426	81.0496
Dox	18	RHL_homolat	0.625	0.625	0.095	0.25	17.7635	71.037
Dox	1	RHL_homolat	0.636364	0.636364	0.25	0.43	15.9645	37.1858
Dox	1	RHL_homolat	0.621622	0.621622	0.205	0.38	17.5436	46.1402
Dox	1	RHL_homolat	0.571429	0.571429	0.125	0.285	20.8087	72.9769
Dox	1	RHL_homolat	0.55	0.55	0.215	0.395	17.7648	44.9972
Dox	1	RHL_homolat	0.548387	0.548387	0.155	0.315	19.2545	61.1614
Dox	1	RHL_homolat	0.613636	0.613636	0.255	0.47	15.7401	33.3307
Dox	1	RHL_homolat	0.592593	0.592593	0.125	0.28	19.3246	68.8943
Dox	2	RHL_homolat	0.466667	0.533333	0.135	0.3	21.8466	72.8219
Dox	2	RHL_homolat	0.553191	0.553191	0.275	0.455	13.9979	30.9037
Dox	2	RHL_homolat	0.533333	0.533333	0.14	0.3	18.8373	62.7909
Dox	2	RHL_homolat	0.513514	0.513514	0.18	0.355	17.7836	50.2895
Dox	2	RHL_homolat	0.516129	0.516129	0.145	0.305	18.4055	60.3512
Dox	2	RHL_homolat	0.571429	0.571429	0.13	0.27	17.4692	64.8396
Dox	2	RHL_homolat	0.521739	0.521739	0.095	0.24	19.4143	80.9158
Dox	2	RHL_homolat	0.518519	0.518519	0.12	0.265	17.5821	66.1756
Dox	7	RHL_homolat	0.53125	0.53125	0.155	0.34	17.9062	52.7795
Dox	7	RHL_homolat	0.482759	0.517241	0.125	0.29	18.3526	63.285
Dox	7	RHL_homolat	0.566667	0.566667	0.14	0.3	17.5048	58.3495
Dox	7	RHL_homolat	0.535714	0.535714	0.11	0.265	20.5588	77.6757
Dox	7	RHL_homolat	0.615385	0.615385	0.11	0.255	17.1162	67.018
Dox	7	RHL_homolat	0.451613	0.548387	0.135	0.3	19.3456	64.565
Dox	7	RHL_homolat	0.5	0.5	0.095	0.245	21.2346	86.7203
Dox	7	RHL_homolat	0.590909	0.590909	0.09	0.225	18.503	82.2346
Dox	7	RHL_homolat	0.482759	0.517241	0.13	0.29	18.8023	64.8356
Dox	8	RHL_homolat	0.571429	0.571429	0.12	0.275	19.5252	71.0393
Dox	8	RHL_homolat	0.576923	0.576923	0.115	0.265	17.6889	66.8253
Dox	8	RHL_homolat	0.48	0.52	0.1	0.245	21.4427	87.5506
Dox	8	RHL_homolat	0.542857	0.542857	0.16	0.315	14.7097	46.4417
Dox	8	RHL_homolat	0.538462	0.538462	0.105	0.25	19.3829	77.513
Dox	8	RHL_homolat	0.56	0.56	0.11	0.25	17.6048	70.4194
Dox	8	RHL_homolat	0.5	0.5	0.115	0.265	20.0684	75.7468
Dox	9	RHL_homolat	0.583333	0.583333	0.1	0.23	18.2343	79.362
Dox	9	RHL_homolat	0.625	0.625	0.115	0.24	14.2111	59.2128
Dox	9	RHL_homolat	0.368421	0.631579	0.055	0.175	25.3521	145.111
Dox	9	RHL_homolat	0.481481	0.518519	0.125	0.255	15.2813	59.9048
Dox	9	RHL_homolat	0.529412	0.529412	0.07	0.18	20.1891	112.192
Dox	9	RHL_homolat	0.619048	0.619048	0.075	0.195	18.9266	97.3727
Dox	9	RHL_homolat	0.526316	0.526316	0.225	0.365	13.2842	36.4599
Dox	9	RHL_homolat	0.575758	0.575758	0.185	0.34	13.4862	39.6832
Dox	9	RHL_homolat	0.473684	0.526316	0.08	0.19	17.7394	93.3655
Dox	10	RHL_homolat	0.607143	0.607143	0.12	0.275	16.7626	60.9553
Dox	10	RHL_homolat	0.666667	0.666667	0.245	0.415	15.11	36.4125
Dox	10	RHL_homolat	0.454545	0.545455	0.085	0.225	23.3901	104.077
Dox	10	RHL_homolat	0.578947	0.578947	0.065	0.18	20.7054	115.233
Dox	10	RHL_homolat	0.555556	0.555556	0.055	0.175	24.9276	142.532
Dox	10	RHL_homolat	0.473684	0.526316	0.07	0.215	25.3653	119.239
Dox	10	RHL_homolat	0.619048	0.619048	0.07	0.18	16.9457	97.7539
Dox	10	RHL_homolat	0.52381	0.52381	0.07	0.195	23.9273	123.266
Dox	10	RHL_homolat	0.45	0.55	0.085	0.225	26.5139	118.41
Dox	12	RHL_homolat	0.583333	0.583333	0.105	0.255	18.1653	71.3735
Dox	12	RHL_homolat	0.619048	0.619048	0.075	0.205	18.954	92.4438
Dox	12	RHL_homolat	0.615385	0.615385	0.13	0.275	16.2031	58.8899
Dox	12	RHL_homolat	0.571429	0.571429	0.085	0.21	17.1562	81.6963
Dox	12	RHL_homolat	0.45	0.55	0.075	0.19	18.3676	96.6572
Dox	12	RHL_homolat	0.478261	0.521739	0.095	0.225	16.6764	74.0487
Dox	12	RHL_homolat	0.458333	0.541667	0.075	0.21	20.1442	96.3364
Dox	13	RHL_homolat	0.571429	0.571429	0.13	0.28	17.7715	63.4698
Dox	13	RHL_homolat	0.548387	0.548387	0.15	0.315	18.4451	58.5552
Dox	13	RHL_homolat	0.5	0.5	0.105	0.245	19.6001	79.9821
Dox	13	RHL_homolat	0.538462	0.538462	0.105	0.235	17.0143	72.5623
Dox	13	RHL_homolat	0.545455	0.545455	0.09	0.215	18.801	87.562
Dox	13	RHL_homolat	0.571429	0.571429	0.09	0.215	19.0963	89.0743
Dox	13	RHL_homolat	0.571429	0.571429	0.095	0.21	17.0999	81.4283
Dox	13	RHL_homolat	0.545455	0.545455	0.1	0.22	17.0976	77.7166
Dox	13	RHL_homolat	0.583333	0.583333	0.105	0.235	15.2552	64.9974
Dox	13	RHL_homolat	0.48	0.52	0.135	0.265	16.2833	61.5476
Dox	14	RHL_homolat	0.576923	0.576923	0.105	0.245	19.862	81.2548
Dox	14	RHL_homolat	0.478261	0.521739	0.095	0.235	21.3777	91.0011
Dox	14	RHL_homolat	0.565217	0.565217	0.095	0.235	19.8693	84.5509
Dox	14	RHL_homolat	0.565217	0.565217	0.1	0.23	17.8732	77.7097
Dox	14	RHL_homolat	0.47619	0.52381	0.08	0.205	20.3191	99.1931
Dox	14	RHL_homolat	0.47619	0.52381	0.07	0.2	20.9988	105.027
Dox	14	RHL_homolat	0.545455	0.545455	0.1	0.235	18.782	79.8698
Dox	14	RHL_homolat	0.458333	0.541667	0.095	0.235	20.7435	88.2553
Dox	14	RHL_homolat	0.65	0.65	0.07	0.19	21.8054	114.803
Dox	15	RHL_homolat	0.521739	0.521739	0.095	0.24	20.3029	84.4829
Dox	15	RHL_homolat	0.5	0.5	0.1	0.255	21.7912	85.6178
Dox	15	RHL_homolat	0.65	0.65	0.07	0.205	21.7492	106.09
Dox	15	RHL_homolat	0.380952	0.619048	0.065	0.18	22.9185	127.269
Dox	15	RHL_homolat	0.421053	0.578947	0.055	0.18	25.3844	140.942
Dox	15	RHL_homolat	0.45	0.55	0.055	0.195	27.2841	139.942
Dox	15	RHL_homolat	0.4	0.6	0.06	0.19	24.9503	131.337
Dox	16	RHL_homolat	0.72	0.72	0.1	0.255	18.7035	73.31
Dox	16	RHL_homolat	0.666667	0.666667	0.1	0.255	17.2722	68.3806
Dox	16	RHL_homolat	0.571429	0.571429	0.115	0.275	19.7835	71.9582
Dox	16	RHL_homolat	0.6	0.6	0.1	0.255	18.3088	71.8417
Dox	16	RHL_homolat	0.5	0.5	0.085	0.23	22.1508	96.3588
Dox	16	RHL_homolat	0.608696	0.608696	0.085	0.215	19.4906	90.6669
Dox	16	RHL_homolat	0.607143	0.607143	0.12	0.285	16.5729	58.153
Dox	16	RHL_homolat	0.515152	0.515152	0.135	0.31	18.8882	60.9677
Dox	16	RHL_homolat	0.52	0.52	0.095	0.24	19.7565	82.4236
Dox	17	RHL_homolat	0.517241	0.517241	0.115	0.28	21.123	75.4782
Dox	17	RHL_homolat	0.388889	0.611111	0.06	0.18	23.2936	129.409
Dox	17	RHL_homolat	0.533333	0.533333	0.14	0.315	19.4066	61.7154
Dox	17	RHL_homolat	0.551724	0.551724	0.135	0.305	17.5658	57.7181
Dox	17	RHL_homolat	0.458333	0.541667	0.075	0.22	22.1074	100.892
Dox	17	RHL_homolat	0.586207	0.586207	0.125	0.295	18.9621	64.2595
Dox	17	RHL_homolat	0.518519	0.518519	0.115	0.275	21.1061	76.7817
Dox	17	RHL_homolat	0.428571	0.571429	0.12	0.27	20.8339	77.3742
Dox	17	RHL_homolat	0.5	0.5	0.09	0.24	21.3802	89.5809
Dox	17	RHL_homolat	0.52381	0.52381	0.075	0.215	22.0818	102.725
Dox	18	RHL_homolat	0.517241	0.517241	0.13	0.28	20.2807	72.581
Dox	18	RHL_homolat	0.517241	0.517241	0.12	0.285	19.7856	69.375
Dox	18	RHL_homolat	0.5	0.5	0.07	0.195	22.4445	115.054
Dox	18	RHL_homolat	0.666667	0.666667	0.075	0.2	18.0151	90.4761
Dox	18	RHL_homolat	0.481481	0.518519	0.12	0.255	19.1495	75.3237
Dox	18	RHL_homolat	0.368421	0.631579	0.065	0.185	21.4892	116.091
Dox	18	RHL_homolat	0.375	0.625	0.065	0.18	21.0131	116.866
Dox	18	RHL_homolat	0.5	0.5	0.08	0.22	22.8689	103.949

## Sheet: RHL_heterolat
Time_ID	Animal_ID	Limb_ID	rawPhase	transPhase	stanceTime(s)	strideTime(s)	strideDist(cm)	instSpd(cm/s)
Con	1	RHL_heterolat	0.117647	0.117647	0.18	0.34	15.9626	46.9489
Con	1	RHL_heterolat	0.121212	0.121212	0.185	0.33	15.7351	47.6822
Con	1	RHL_heterolat	0.0588235	0.0588235	0.185	0.345	14.3327	41.5679
Con	1	RHL_heterolat	0.0285714	0.0285714	0.225	0.385	14.069	36.5145
Con	1	RHL_heterolat	0.0857143	0.0857143	0.18	0.33	15.2279	46.1172
Con	1	RHL_heterolat	0.0666667	0.0666667	0.145	0.295	17.8637	60.7022
Con	1	RHL_heterolat	0.0333333	0.0333333	0.145	0.285	15.9317	55.849
Con	1	RHL_heterolat	0.129032	0.129032	0.15	0.295	14.4216	48.9117
Con	1	RHL_heterolat	0	0	0.17	0.33	18.1616	55.0012
Con	2	RHL_heterolat	0.0967742	0.0967742	0.17	0.33	15.7562	47.8833
Con	2	RHL_heterolat	0.171429	0.171429	0.185	0.335	15.1976	45.4101
Con	2	RHL_heterolat	0.129032	0.129032	0.17	0.32	16.0387	50.1513
Con	2	RHL_heterolat	1	0	0.12	0.275	19.127	69.5828
Con	2	RHL_heterolat	0.966667	0.0333333	0.14	0.29	16.7632	57.7752
Con	2	RHL_heterolat	0	0	0.15	0.305	17.0959	56.0352
Con	2	RHL_heterolat	1	0	0.12	0.275	19.3749	70.6257
Con	2	RHL_heterolat	0.958333	0.0416667	0.12	0.265	17.8908	67.6821
Con	2	RHL_heterolat	0.0322581	0.0322581	0.11	0.24	15.2566	63.5693
Con	2	RHL_heterolat	0.0357143	0.0357143	0.145	0.285	14.0324	49.2215
Con	7	RHL_heterolat	0.0967742	0.0967742	0.175	0.315	14.6775	46.5643
Con	7	RHL_heterolat	0.125	0.125	0.165	0.315	16.5111	52.3972
Con	7	RHL_heterolat	0.173913	0.173913	0.095	0.23	17.2263	74.8969
Con	7	RHL_heterolat	0.08	0.08	0.115	0.245	16.6341	67.9892
Con	7	RHL_heterolat	0.0952381	0.0952381	0.09	0.215	19.4287	90.4673
Con	7	RHL_heterolat	0.12	0.12	0.115	0.25	18.3466	73.3864
Con	7	RHL_heterolat	0	0	0.1	0.22	15.5191	70.5414
Con	8	RHL_heterolat	0.21875	0.21875	0.17	0.315	13.6783	43.4671
Con	8	RHL_heterolat	0.142857	0.142857	0.165	0.31	15.9228	51.3669
Con	8	RHL_heterolat	0.1	0.1	0.13	0.28	15.8421	56.6
Con	8	RHL_heterolat	0	0	0.17	0.335	17.8685	53.2801
Con	8	RHL_heterolat	0.931034	0.0689655	0.13	0.255	15.4683	60.7327
Con	9	RHL_heterolat	0.115385	0.115385	0.135	0.26	13.598	52.3
Con	9	RHL_heterolat	0.166667	0.166667	0.15	0.29	14.4641	49.9052
Con	9	RHL_heterolat	0.192308	0.192308	0.13	0.26	13.8415	53.2366
Con	9	RHL_heterolat	0.166667	0.166667	0.155	0.285	13.0661	45.8864
Con	9	RHL_heterolat	0.1	0.1	0.18	0.31	10.3247	33.2455
Con	9	RHL_heterolat	0.171429	0.171429	0.2	0.335	13.2208	39.4048
Con	9	RHL_heterolat	0.0869565	0.0869565	0.115	0.23	14.754	64.1477
Con	9	RHL_heterolat	0.111111	0.111111	0.14	0.265	13.987	52.7478
Con	10	RHL_heterolat	0.153846	0.153846	0.14	0.28	16.4123	58.6313
Con	10	RHL_heterolat	0.148148	0.148148	0.135	0.27	16.3265	60.4686
Con	10	RHL_heterolat	0.111111	0.111111	0.13	0.28	18.6055	66.5182
Con	10	RHL_heterolat	0.0869565	0.0869565	0.115	0.24	18.0427	75.1603
Con	10	RHL_heterolat	0.0416667	0.0416667	0.12	0.245	19.4319	79.2926
Con	12	RHL_heterolat	0.121212	0.121212	0.165	0.335	15.4272	46.0453
Con	12	RHL_heterolat	0.0344828	0.0344828	0.165	0.305	17.4815	57.3856
Con	12	RHL_heterolat	0.1	0.1	0.155	0.3	16.1786	53.9287
Con	12	RHL_heterolat	0.0322581	0.0322581	0.155	0.32	16.9161	52.8221
Con	12	RHL_heterolat	0.0384615	0.0384615	0.1	0.25	19.1023	76.4494
Con	12	RHL_heterolat	0.12	0.12	0.105	0.24	14.1355	58.7385
Con	12	RHL_heterolat	0.0909091	0.0909091	0.14	0.305	16.7397	55.1101
Con	12	RHL_heterolat	0	0	0.105	0.235	17.6352	75.1498
Con	12	RHL_heterolat	0.0714286	0.0714286	0.125	0.275	14.3827	52.2959
Con	12	RHL_heterolat	0.137931	0.137931	0.145	0.28	14.8002	52.9362
Con	13	RHL_heterolat	1	0	0.155	0.315	18.7456	59.5034
Con	13	RHL_heterolat	1	0	0.17	0.34	17.444	51.306
Con	13	RHL_heterolat	0.928571	0.0714286	0.13	0.28	18.5199	66.1426
Con	13	RHL_heterolat	0.928571	0.0714286	0.125	0.28	17.0457	60.8774
Con	13	RHL_heterolat	0.916667	0.0833333	0.1	0.24	19.972	83.2168
Con	13	RHL_heterolat	0.916667	0.0833333	0.095	0.24	19.2325	80.1356
Con	13	RHL_heterolat	0.909091	0.0909091	0.08	0.215	21.3334	99.236
Con	13	RHL_heterolat	0.966667	0.0333333	0.135	0.285	18.8007	66.1975
Con	13	RHL_heterolat	0.933333	0.0666667	0.12	0.275	18.7885	68.4145
Con	13	RHL_heterolat	1	0	0.12	0.27	19.3066	71.506
Con	14	RHL_heterolat	0.0851064	0.0851064	0.27	0.465	16.2218	34.8841
Con	14	RHL_heterolat	0.183673	0.183673	0.31	0.465	13.83	29.7744
Con	14	RHL_heterolat	0.172414	0.172414	0.145	0.29	18.0808	62.3476
Con	14	RHL_heterolat	0.0740741	0.0740741	0.14	0.285	17.2938	60.7429
Con	14	RHL_heterolat	0.956522	0.0434783	0.085	0.22	20.9236	95.1199
Con	14	RHL_heterolat	0	0	0.09	0.215	20.3487	94.7057
Con	14	RHL_heterolat	1	0	0.085	0.21	19.7511	93.9002
Con	14	RHL_heterolat	0.172414	0.172414	0.135	0.28	16.4682	58.8838
Con	14	RHL_heterolat	0.16129	0.16129	0.145	0.31	14.8043	47.7557
Con	14	RHL_heterolat	0.05	0.05	0.085	0.2	17.7708	88.8538
Con	14	RHL_heterolat	0.0833333	0.0833333	0.085	0.23	20.6661	89.903
Con	14	RHL_heterolat	0.0909091	0.0909091	0.085	0.22	18.1167	82.3486
Con	15	RHL_heterolat	0.0588235	0.0588235	0.17	0.335	18.2302	54.4418
Con	15	RHL_heterolat	0.0909091	0.0909091	0.165	0.325	17.8287	54.8449
Con	15	RHL_heterolat	0.0384615	0.0384615	0.11	0.26	18.0686	69.4946
Con	15	RHL_heterolat	0.972222	0.0277778	0.15	0.335	17.3585	51.8631
Con	15	RHL_heterolat	1	0	0.1	0.225	16.9246	75.2659
Con	15	RHL_heterolat	0.96	0.04	0.11	0.245	20.6868	84.4933
Con	15	RHL_heterolat	0.954545	0.0454545	0.08	0.22	20.1305	91.5021
Con	15	RHL_heterolat	0.96	0.04	0.1	0.25	17.8712	71.4849
Con	15	RHL_heterolat	0.0294118	0.0294118	0.19	0.34	14.6192	42.9977
Con	15	RHL_heterolat	0.0294118	0.0294118	0.22	0.34	12.1409	35.7085
Con	16	RHL_heterolat	0.173913	0.173913	0.1	0.24	18.6555	77.7155
Con	16	RHL_heterolat	0.0833333	0.0833333	0.105	0.25	18.8026	75.2755
Con	16	RHL_heterolat	0.206897	0.206897	0.115	0.27	18.4605	68.6634
Con	16	RHL_heterolat	0.166667	0.166667	0.11	0.25	17.8381	71.4706
Con	16	RHL_heterolat	0.173913	0.173913	0.085	0.23	20.0538	87.1904
Con	16	RHL_heterolat	0.166667	0.166667	0.115	0.295	17.0393	57.8207
Con	16	RHL_heterolat	0.142857	0.142857	0.135	0.32	15.8508	50.5602
Con	16	RHL_heterolat	0.0857143	0.0857143	0.185	0.36	11.6288	32.3385
Con	16	RHL_heterolat	0	0	0.235	0.425	13.4693	31.5679
Con	16	RHL_heterolat	1	0	0.14	0.32	18.0897	56.5304
Con	16	RHL_heterolat	0.26087	0.26087	0.09	0.225	16.6706	74.1447
Con	17	RHL_heterolat	0.105263	0.105263	0.185	0.375	15.6771	41.8091
Con	17	RHL_heterolat	0.125	0.125	0.185	0.395	16.9271	42.8621
Con	17	RHL_heterolat	0.0344828	0.0344828	0.13	0.29	18.7226	64.5607
Con	17	RHL_heterolat	0.103448	0.103448	0.115	0.28	19.2319	68.6218
Con	17	RHL_heterolat	0.0344828	0.0344828	0.125	0.29	18.6984	64.4772
Con	17	RHL_heterolat	0.04	0.04	0.1	0.255	18.411	72.1997
Con	17	RHL_heterolat	0.206897	0.206897	0.105	0.265	16.3653	61.7236
Con	17	RHL_heterolat	0.96875	0.03125	0.175	0.35	15.275	43.5936
Con	18	RHL_heterolat	0.133333	0.133333	0.15	0.3	16.9263	56.4209
Con	18	RHL_heterolat	0.137931	0.137931	0.15	0.29	15.993	55.1483
Con	18	RHL_heterolat	0	0	0.11	0.26	18.7733	72.2945
Con	18	RHL_heterolat	0.0714286	0.0714286	0.095	0.255	17.4098	68.6264
Con	18	RHL_heterolat	0.181818	0.181818	0.165	0.31	14.2461	45.8971
Con	18	RHL_heterolat	1	0	0.095	0.275	17.8256	64.7908
Con	18	RHL_heterolat	0.96	0.04	0.1	0.26	17.0523	65.6538
Con	18	RHL_heterolat	1	0	0.09	0.245	17.4363	71.2146
Con	18	RHL_heterolat	0.966667	0.0333333	0.12	0.29	17.2201	59.3728
Con	18	RHL_heterolat	0	0	0.095	0.245	17.31	70.6865
Con	18	RHL_heterolat	1	0	0.105	0.25	15.0487	60.1949
Con	18	RHL_heterolat	1	0	0.135	0.275	15.4263	56.2649
Con	1	RHL_heterolat	0.030303	0.030303	0.165	0.33	15.9607	48.3658
Con	1	RHL_heterolat	0.944444	0.0555556	0.155	0.325	18.0606	55.6432
Con	1	RHL_heterolat	0.111111	0.111111	0.16	0.33	14.0201	42.3409
Con	1	RHL_heterolat	0	0	0.13	0.28	19.5935	69.9769
Con	1	RHL_heterolat	1	0	0.125	0.27	20.3775	75.444
Con	1	RHL_heterolat	0.966667	0.0333333	0.14	0.3	19.4532	64.844
Con	2	RHL_heterolat	0	0	0.17	0.325	16.7383	51.4986
Con	2	RHL_heterolat	1	0	0.16	0.37	15.6094	42.238
Con	2	RHL_heterolat	0	0	0.185	0.345	16.4268	47.5255
Con	2	RHL_heterolat	1	0	0.18	0.34	18.503	54.4206
Con	2	RHL_heterolat	0	0	0.14	0.275	17.5872	63.9538
Con	2	RHL_heterolat	1	0	0.135	0.275	16.9064	61.4814
Con	2	RHL_heterolat	0.0344828	0.0344828	0.145	0.29	13.7196	47.309
Con	7	RHL_heterolat	0.0833333	0.0833333	0.175	0.35	17.3075	49.4355
Con	7	RHL_heterolat	0.0333333	0.0333333	0.155	0.315	15.8037	45.7628
Con	7	RHL_heterolat	0.03125	0.03125	0.16	0.32	14.7916	47.4329
Con	7	RHL_heterolat	0.966667	0.0333333	0.12	0.27	18.5198	64.8401
Con	7	RHL_heterolat	0.0769231	0.0769231	0.11	0.255	17.4472	69.7105
Con	7	RHL_heterolat	0.961538	0.0384615	0.145	0.285	14.3174	53.1039
Con	7	RHL_heterolat	0.806452	0.193548	0.13	0.28	17.9246	58.3908
Con	8	RHL_heterolat	0.0322581	0.0322581	0.145	0.325	13.4393	41.3268
Con	8	RHL_heterolat	0.15625	0.15625	0.155	0.3	14.9809	49.906
Con	8	RHL_heterolat	0.0555556	0.0555556	0.205	0.375	13.6102	36.3134
Con	8	RHL_heterolat	0.972222	0.0277778	0.175	0.355	16.8369	47.4191
Con	8	RHL_heterolat	0.0277778	0.0277778	0.18	0.35	15.8054	45.1455
Con	8	RHL_heterolat	0.137931	0.137931	0.15	0.29	15.0361	51.8485
Con	8	RHL_heterolat	0.103448	0.103448	0.155	0.295	13.6196	46.1506
Con	8	RHL_heterolat	0.166667	0.166667	0.15	0.29	13.5457	46.6634
Con	9	RHL_heterolat	0.107143	0.107143	0.13	0.27	17.2509	63.9027
Con	9	RHL_heterolat	0.129032	0.129032	0.155	0.305	15.5922	51.098
Con	9	RHL_heterolat	1	0	0.15	0.3	16.155	53.8501
Con	9	RHL_heterolat	0.0666667	0.0666667	0.145	0.29	15.1144	52.1204
Con	9	RHL_heterolat	0.0689655	0.0689655	0.14	0.29	16.6598	57.4477
Con	9	RHL_heterolat	0.037037	0.037037	0.13	0.275	15.2834	55.5833
Con	10	RHL_heterolat	0.115385	0.115385	0.115	0.26	19.2887	74.1873
Con	10	RHL_heterolat	0.0416667	0.0416667	0.115	0.25	18.5058	74.1093
Con	10	RHL_heterolat	0.192308	0.192308	0.1	0.24	19.9829	83.4459
Con	10	RHL_heterolat	0.136364	0.136364	0.095	0.23	19.2032	83.529
Con	10	RHL_heterolat	0.0384615	0.0384615	0.12	0.26	19.8824	76.4708
Con	10	RHL_heterolat	0	0	0.105	0.245	17.5439	71.5979
Con	10	RHL_heterolat	0.0384615	0.0384615	0.13	0.275	17.2724	62.774
Con	10	RHL_heterolat	0.0740741	0.0740741	0.12	0.265	18.1524	68.4712
Con	10	RHL_heterolat	0.148148	0.148148	0.115	0.26	19.8058	76.2025
Con	10	RHL_heterolat	0.2	0.2	0.115	0.245	17.919	73.1348
Con	10	RHL_heterolat	0.227273	0.227273	0.1	0.23	19.4185	84.4885
Con	10	RHL_heterolat	0.272727	0.272727	0.09	0.215	17.5318	81.5306
Con	12	RHL_heterolat	0	0	0.13	0.28	19.183	68.467
Con	12	RHL_heterolat	1	0	0.13	0.285	19.226	67.4878
Con	12	RHL_heterolat	0.0454545	0.0454545	0.085	0.22	21.6118	98.2353
Con	12	RHL_heterolat	0.0416667	0.0416667	0.095	0.24	18.9253	78.8554
Con	12	RHL_heterolat	0.173913	0.173913	0.09	0.245	17.4087	71.7047
Con	12	RHL_heterolat	0.130435	0.130435	0.12	0.275	16.5395	62.5627
Con	12	RHL_heterolat	0.172414	0.172414	0.145	0.315	14.6138	46.9341
Con	12	RHL_heterolat	0.961538	0.0384615	0.095	0.25	21.4303	85.8009
Con	13	RHL_heterolat	1	0	0.17	0.35	19.9275	57.0149
Con	13	RHL_heterolat	1	0	0.195	0.37	17.6214	47.6191
Con	13	RHL_heterolat	0.178571	0.178571	0.11	0.265	18.5068	69.7303
Con	13	RHL_heterolat	0.185185	0.185185	0.1	0.26	16.6297	64.0769
Con	13	RHL_heterolat	0.133333	0.133333	0.15	0.305	21.4987	70.4818
Con	13	RHL_heterolat	0.173913	0.173913	0.1	0.23	20.2261	87.9394
Con	13	RHL_heterolat	0.142857	0.142857	0.12	0.285	17.97	63.1013
Con	13	RHL_heterolat	0.193548	0.193548	0.15	0.32	15.1494	47.6182
Con	13	RHL_heterolat	0.133333	0.133333	0.125	0.285	17.9298	62.9427
Con	13	RHL_heterolat	0.0857143	0.0857143	0.19	0.355	17.1963	48.4424
Con	14	RHL_heterolat	0.15625	0.15625	0.16	0.31	17.8757	57.6834
Con	14	RHL_heterolat	0.2	0.2	0.14	0.295	19.6702	66.7003
Con	14	RHL_heterolat	0.172414	0.172414	0.12	0.285	19.289	67.6807
Con	14	RHL_heterolat	0.0740741	0.0740741	0.125	0.285	19.7928	69.6229
Con	14	RHL_heterolat	0	0	0.165	0.305	18.6222	60.93
Con	14	RHL_heterolat	1	0	0.12	0.255	20.3996	80.0744
Con	14	RHL_heterolat	0.111111	0.111111	0.12	0.275	20.3181	73.8427
Con	14	RHL_heterolat	0.12	0.12	0.105	0.25	20.5532	82.2128
Con	14	RHL_heterolat	0.846154	0.153846	0.09	0.235	20.4001	70.2261
Con	15	RHL_heterolat	0.0909091	0.0909091	0.19	0.35	17.2386	49.2915
Con	15	RHL_heterolat	0.111111	0.111111	0.18	0.355	19.0769	53.7414
Con	15	RHL_heterolat	0.0322581	0.0322581	0.145	0.325	20.3943	62.7738
Con	15	RHL_heterolat	0.166667	0.166667	0.12	0.26	18.1472	69.7947
Con	15	RHL_heterolat	0	0	0.08	0.225	22.3099	99.1137
Con	15	RHL_heterolat	1	0	0.085	0.23	19.9529	86.7516
Con	15	RHL_heterolat	0.103448	0.103448	0.13	0.28	16.3956	58.4745
Con	15	RHL_heterolat	0.928571	0.0714286	0.105	0.26	17.9886	69.5296
Con	16	RHL_heterolat	0.178571	0.178571	0.135	0.29	18.7396	64.6181
Con	16	RHL_heterolat	0.172414	0.172414	0.135	0.29	19.0986	65.8574
Con	16	RHL_heterolat	0.08	0.08	0.115	0.255	18.2409	71.4718
Con	16	RHL_heterolat	0.12	0.12	0.1	0.245	20.4866	83.5898
Con	16	RHL_heterolat	0.148148	0.148148	0.105	0.26	19.2376	73.7511
Con	16	RHL_heterolat	0.142857	0.142857	0.11	0.275	15.1199	54.9881
Con	16	RHL_heterolat	0.142857	0.142857	0.14	0.28	19.7175	70.4196
Con	16	RHL_heterolat	0.916667	0.0833333	0.13	0.345	14.1079	41.167
Con	16	RHL_heterolat	0.780488	0.219512	0.2	0.39	14.5297	37.3132
Con	17	RHL_heterolat	0	0	0.165	0.325	17.4316	53.657
Con	17	RHL_heterolat	1	0	0.205	0.345	17.4471	50.5926
Con	17	RHL_heterolat	0.0322581	0.0322581	0.155	0.33	16.2505	49.3431
Con	17	RHL_heterolat	0.0294118	0.0294118	0.165	0.34	15.8775	46.6985
Con	17	RHL_heterolat	0.0285714	0.0285714	0.18	0.355	18.578	52.31
Con	17	RHL_heterolat	0.0645161	0.0645161	0.13	0.305	18.9108	61.9606
Con	17	RHL_heterolat	1	0	0.11	0.27	19.6091	72.6568
Con	17	RHL_heterolat	0.0625	0.0625	0.225	0.36	13.8406	38.4997
Con	17	RHL_heterolat	0.09375	0.09375	0.155	0.315	15.2929	48.5638
Con	17	RHL_heterolat	0.229167	0.229167	0.24	0.44	9.72362	21.9441
Con	18	RHL_heterolat	0.151515	0.151515	0.175	0.33	16.2875	49.3562
Con	18	RHL_heterolat	0.0625	0.0625	0.17	0.335	15.8914	47.6211
Con	18	RHL_heterolat	0.0869565	0.0869565	0.11	0.245	18.194	74.4317
Con	18	RHL_heterolat	0.371429	0.371429	0.14	0.29	13.7369	47.596
Con	18	RHL_heterolat	0.0909091	0.0909091	0.085	0.215	19.4673	90.5514
Con	18	RHL_heterolat	0.0740741	0.0740741	0.125	0.235	15.3362	66.7719
Con	18	RHL_heterolat	0.0454545	0.0454545	0.11	0.245	18.0106	73.3585
Con	18	RHL_heterolat	0.0434783	0.0434783	0.08	0.23	21.2715	92.485
Con	1	RHL_heterolat	0.970588	0.0294118	0.145	0.325	20.8096	64.0264
Con	1	RHL_heterolat	0.0588235	0.0588235	0.175	0.375	20.3004	54.213
Con	1	RHL_heterolat	0.0645161	0.0645161	0.14	0.305	21.4473	70.3676
Con	1	RHL_heterolat	0.0357143	0.0357143	0.115	0.285	21.2498	74.5755
Con	1	RHL_heterolat	0.972973	0.027027	0.155	0.335	20.4944	61.1813
Con	1	RHL_heterolat	0.162162	0.162162	0.15	0.335	18.7649	55.9752
Con	1	RHL_heterolat	1	0	0.135	0.325	22.2012	68.3282
Con	1	RHL_heterolat	0.0869565	0.0869565	0.235	0.445	20.4009	45.8329
Con	1	RHL_heterolat	0.219512	0.219512	0.21	0.385	16.4416	42.6884
Con	1	RHL_heterolat	0.0322581	0.0322581	0.135	0.31	21.8261	70.4069
Con	2	RHL_heterolat	0.928571	0.0714286	0.11	0.275	22.3769	81.2483
Con	2	RHL_heterolat	0.178571	0.178571	0.09	0.245	21.5154	88.1157
Con	2	RHL_heterolat	1	0	0.075	0.22	25.6576	116.625
Con	2	RHL_heterolat	0.941176	0.0588235	0.135	0.335	21.1126	63.0328
Con	2	RHL_heterolat	0.972222	0.0277778	0.155	0.37	15.9314	43.1667
Con	2	RHL_heterolat	0.966667	0.0333333	0.14	0.3	21.2418	70.8061
Con	2	RHL_heterolat	1	0	0.105	0.275	20.5067	74.5959
Con	2	RHL_heterolat	0.0357143	0.0357143	0.14	0.3	12.4961	42.1042
Con	7	RHL_heterolat	0	0	0.145	0.335	20.1534	60.1592
Con	7	RHL_heterolat	1	0	0.165	0.39	16.749	42.9462
Con	7	RHL_heterolat	0.0192308	0.0192308	0.285	0.55	13.0666	23.8263
Con	7	RHL_heterolat	0.132075	0.132075	0.345	0.5	11.6685	23.425
Con	7	RHL_heterolat	0.0425532	0.0425532	0.28	0.495	14.5492	29.4747
Con	7	RHL_heterolat	0.142857	0.142857	0.18	0.33	17.8293	54.2249
Con	7	RHL_heterolat	0.16129	0.16129	0.15	0.31	18.5774	59.9271
Con	7	RHL_heterolat	1	0	0.14	0.295	17.96	60.8297
Con	7	RHL_heterolat	0.0512821	0.0512821	0.215	0.42	14.2954	34.164
Con	7	RHL_heterolat	0.162791	0.162791	0.27	0.445	12.4717	27.9973
Con	7	RHL_heterolat	0	0	0.1	0.285	19.3393	67.7604
Con	8	RHL_heterolat	0.133333	0.133333	0.12	0.29	19.3199	66.6083
Con	8	RHL_heterolat	0.0555556	0.0555556	0.19	0.37	14.8523	40.1689
Con	8	RHL_heterolat	0.0344828	0.0344828	0.125	0.295	21.5901	73.189
Con	8	RHL_heterolat	0.272727	0.272727	0.13	0.29	17.2683	59.6764
Con	8	RHL_heterolat	0.193548	0.193548	0.13	0.29	16.894	58.314
Con	8	RHL_heterolat	0.146341	0.146341	0.245	0.41	13.4751	32.8661
Con	8	RHL_heterolat	0.09375	0.09375	0.16	0.315	14.4047	45.7156
Con	8	RHL_heterolat	1	0	0.095	0.23	22.568	98.1567
Con	9	RHL_heterolat	1	0	0.075	0.22	22.8928	104.058
Con	9	RHL_heterolat	1	0	0.085	0.23	22.4813	97.7446
Con	9	RHL_heterolat	0	0	0.18	0.33	16.6724	50.4875
Con	9	RHL_heterolat	1	0	0.14	0.285	18.6467	65.443
Con	9	RHL_heterolat	0.117647	0.117647	0.16	0.325	16.2379	50.009
Con	9	RHL_heterolat	0.137931	0.137931	0.135	0.275	14.9495	54.2873
Con	9	RHL_heterolat	0	0	0.14	0.285	18.7165	65.7136
Con	9	RHL_heterolat	1	0	0.145	0.32	16.6924	52.0101
Con	10	RHL_heterolat	0.103448	0.103448	0.12	0.29	22.1047	76.2231
Con	10	RHL_heterolat	0.0833333	0.0833333	0.095	0.245	21.1089	86.2036
Con	10	RHL_heterolat	1	0	0.115	0.29	18.809	64.7882
Con	10	RHL_heterolat	0.0625	0.0625	0.155	0.33	16.032	48.6085
Con	10	RHL_heterolat	0.0769231	0.0769231	0.195	0.385	17.0625	44.3401
Con	10	RHL_heterolat	1	0	0.22	0.385	16.9775	44.7759
Con	10	RHL_heterolat	0.0454545	0.0454545	0.09	0.22	18.4752	83.978
Con	10	RHL_heterolat	0	0	0.1	0.255	19.2541	75.6103
Con	12	RHL_heterolat	0.961538	0.0384615	0.09	0.245	24.5535	100.444
Con	12	RHL_heterolat	0.846154	0.153846	0.1	0.245	22.0817	84.9296
Con	12	RHL_heterolat	1	0	0.115	0.29	18.2984	56.1858
Con	12	RHL_heterolat	0.0384615	0.0384615	0.115	0.27	16.9575	59.9949
Con	13	RHL_heterolat	0.0689655	0.0689655	0.135	0.295	18.0604	61.2042
Con	13	RHL_heterolat	0.16129	0.16129	0.135	0.295	19.5489	66.2743
Con	13	RHL_heterolat	0	0	0.125	0.285	19.8989	69.7969
Con	13	RHL_heterolat	1	0	0.13	0.285	18.7543	65.7641
Con	13	RHL_heterolat	0	0	0.1	0.24	20.4572	85.202
Con	13	RHL_heterolat	1	0	0.09	0.235	21.126	89.888
Con	13	RHL_heterolat	0	0	0.21	0.34	14.9052	43.7418
Con	13	RHL_heterolat	1	0	0.115	0.26	19.4524	74.8368
Con	14	RHL_heterolat	0	0	0.125	0.28	18.7509	67.0475
Con	14	RHL_heterolat	1	0	0.135	0.285	18.8177	66.0211
Con	14	RHL_heterolat	0.916667	0.0833333	0.1	0.235	21.2434	90.4482
Con	14	RHL_heterolat	0.958333	0.0416667	0.095	0.24	21.0427	87.678
Con	14	RHL_heterolat	0.105263	0.105263	0.205	0.375	14.6706	39.1158
Con	14	RHL_heterolat	0.102564	0.102564	0.22	0.39	16.1886	41.5093
Con	14	RHL_heterolat	0	0	0.105	0.25	19.3855	77.582
Con	14	RHL_heterolat	1	0	0.13	0.295	19.1766	65.0274
Con	15	RHL_heterolat	0	0	0.095	0.25	21.7482	86.9854
Con	15	RHL_heterolat	0.0416667	0.0416667	0.085	0.235	21.7889	92.6265
Con	15	RHL_heterolat	0	0	0.19	0.375	16.7996	44.8033
Con	15	RHL_heterolat	1	0	0.21	0.405	18.0657	44.6053
Con	15	RHL_heterolat	0.0243902	0.0243902	0.215	0.41	14.939	36.4957
Con	15	RHL_heterolat	0.935484	0.0645161	0.125	0.29	18.4571	63.6974
Con	15	RHL_heterolat	0.88	0.12	0.1	0.245	20.909	85.4036
Con	15	RHL_heterolat	0.916667	0.0833333	0.095	0.23	19.1945	83.271
Con	16	RHL_heterolat	0.2	0.2	0.125	0.28	19.0592	68.2597
Con	16	RHL_heterolat	0.16129	0.16129	0.15	0.315	15.604	49.5325
Con	16	RHL_heterolat	0.117647	0.117647	0.175	0.345	15.1761	44.0133
Con	16	RHL_heterolat	0.130435	0.130435	0.1	0.24	19.8504	82.8057
Con	16	RHL_heterolat	0.0714286	0.0714286	0.24	0.44	15.8944	36.137
Con	16	RHL_heterolat	0.0909091	0.0909091	0.155	0.33	18.8987	57.2689
Con	16	RHL_heterolat	0.166667	0.166667	0.115	0.28	19.5797	69.9897
Con	16	RHL_heterolat	0.0714286	0.0714286	0.125	0.295	17.9786	61.0196
Con	16	RHL_heterolat	0.0357143	0.0357143	0.15	0.305	13.973	46.138
Con	16	RHL_heterolat	0.147059	0.147059	0.16	0.32	16.8372	52.812
Con	17	RHL_heterolat	0	0	0.105	0.265	20.3542	76.851
Con	17	RHL_heterolat	0.9	0.1	0.125	0.29	19.8495	68.5868
Con	17	RHL_heterolat	0.96875	0.03125	0.14	0.305	16.4259	53.696
Con	17	RHL_heterolat	1	0	0.27	0.45	17.4972	38.8769
Con	17	RHL_heterolat	0.942857	0.0571429	0.165	0.345	17.7935	51.5595
Con	17	RHL_heterolat	0	0	0.105	0.26	18.6436	71.7831
Con	17	RHL_heterolat	1	0	0.15	0.34	16.2436	47.7662
Con	17	RHL_heterolat	0.939394	0.0606061	0.175	0.33	15.5239	47.0421
Con	18	RHL_heterolat	0.111111	0.111111	0.14	0.285	16.7901	58.8505
Con	18	RHL_heterolat	0.290323	0.290323	0.13	0.28	12.9409	46.2509
Con	18	RHL_heterolat	0.966667	0.0333333	0.11	0.24	17.8225	74.2505
Con	18	RHL_heterolat	0.1	0.1	0.13	0.28	16.9267	60.5468
Con	18	RHL_heterolat	0.0967742	0.0967742	0.175	0.31	14.9668	48.28
Con	18	RHL_heterolat	0	0	0.095	0.225	19.2003	85.5416
Con	18	RHL_heterolat	0.137931	0.137931	0.16	0.3	16.3597	54.5858
Con	18	RHL_heterolat	0.0952381	0.0952381	0.08	0.21	20.7733	98.9206
Con	18	RHL_heterolat	0.0454545	0.0454545	0.08	0.225	21.0554	93.6368
Con	1	RHL_heterolat	0.0277778	0.0277778	0.18	0.365	20.954	57.4001
Con	1	RHL_heterolat	0.117647	0.117647	0.155	0.325	19.4394	59.7255
Con	1	RHL_heterolat	0.0645161	0.0645161	0.14	0.315	20.5662	65.2578
Con	1	RHL_heterolat	0	0	0.115	0.29	23.099	79.7198
Con	1	RHL_heterolat	0.0294118	0.0294118	0.155	0.345	22.1443	64.176
Con	1	RHL_heterolat	0.0294118	0.0294118	0.19	0.37	19.5865	52.9318
Con	1	RHL_heterolat	0.0833333	0.0833333	0.19	0.375	17.3613	46.4162
Con	1	RHL_heterolat	0.03125	0.03125	0.165	0.34	20.4282	60.0143
Con	1	RHL_heterolat	0.0666667	0.0666667	0.125	0.295	21.8656	74.1037
Con	2	RHL_heterolat	1	0	0.11	0.27	21.9989	81.4694
Con	2	RHL_heterolat	0.933333	0.0666667	0.11	0.265	19.498	73.6236
Con	2	RHL_heterolat	0.04	0.04	0.105	0.255	19.2048	75.4145
Con	2	RHL_heterolat	0.135135	0.135135	0.195	0.35	13.8576	39.6949
Con	2	RHL_heterolat	0.0681818	0.0681818	0.25	0.435	17.7435	40.798
Con	2	RHL_heterolat	0.0512821	0.0512821	0.21	0.395	18.6102	47.1332
Con	2	RHL_heterolat	0.0333333	0.0333333	0.155	0.32	18.5017	57.619
Con	2	RHL_heterolat	0.121212	0.121212	0.16	0.325	14.8207	45.5741
Con	2	RHL_heterolat	0.114286	0.114286	0.205	0.35	14.7743	42.2124
Con	7	RHL_heterolat	1	0	0.205	0.38	18.5232	48.679
Con	7	RHL_heterolat	0.09375	0.09375	0.16	0.32	18.2379	56.9936
Con	7	RHL_heterolat	0.148148	0.148148	0.12	0.265	16.031	60.4201
Con	7	RHL_heterolat	0.0789474	0.0789474	0.205	0.37	14.444	39.0169
Con	7	RHL_heterolat	0.0576923	0.0576923	0.33	0.52	13.4773	25.918
Con	7	RHL_heterolat	0.037037	0.037037	0.11	0.27	20.146	74.6147
Con	7	RHL_heterolat	0.0333333	0.0333333	0.13	0.31	19.8068	63.8803
Con	8	RHL_heterolat	0.9375	0.0625	0.145	0.315	18.0416	57.256
Con	8	RHL_heterolat	0.15625	0.15625	0.125	0.285	20.7279	73.0813
Con	8	RHL_heterolat	0.133333	0.133333	0.125	0.275	15.7435	52.4784
Con	8	RHL_heterolat	0.96	0.04	0.105	0.255	21.3414	82.0988
Con	8	RHL_heterolat	0.0833333	0.0833333	0.1	0.255	20.8452	85.0412
Con	9	RHL_heterolat	1	0	0.105	0.25	21.034	84.191
Con	9	RHL_heterolat	0.05	0.05	0.08	0.21	22.5794	107.588
Con	9	RHL_heterolat	0.047619	0.047619	0.07	0.21	22.5282	107.277
Con	9	RHL_heterolat	0.227273	0.227273	0.07	0.21	23.1039	109.831
Con	9	RHL_heterolat	0.0810811	0.0810811	0.205	0.375	15.9616	42.544
Con	9	RHL_heterolat	0.125	0.125	0.13	0.24	11.6721	48.6337
Con	10	RHL_heterolat	0.0833333	0.0833333	0.085	0.225	22.4124	99.9617
Con	10	RHL_heterolat	0	0	0.1	0.23	17.6084	76.9145
Con	10	RHL_heterolat	0.130435	0.130435	0.095	0.235	22.099	94.0445
Con	10	RHL_heterolat	0.888889	0.111111	0.165	0.35	18.8976	54.0376
Con	12	RHL_heterolat	0.037037	0.037037	0.12	0.28	20.4611	73.0925
Con	12	RHL_heterolat	0.037037	0.037037	0.11	0.27	19.9672	73.9524
Con	12	RHL_heterolat	0.103448	0.103448	0.105	0.28	20.537	73.4329
Con	12	RHL_heterolat	1	0	0.145	0.31	18.8173	60.6777
Con	12	RHL_heterolat	0	0	0.155	0.315	16.4545	52.1608
Con	12	RHL_heterolat	1	0	0.12	0.29	20.0914	69.2806
Con	12	RHL_heterolat	0	0	0.085	0.245	22.0819	90.315
Con	12	RHL_heterolat	1	0	0.14	0.31	17.8964	57.6304
Con	13	RHL_heterolat	0.189189	0.189189	0.2	0.375	18.6193	49.6017
Con	13	RHL_heterolat	0.0714286	0.0714286	0.21	0.42	18.3518	43.6949
Con	13	RHL_heterolat	0.0851064	0.0851064	0.26	0.465	15.4256	33.1739
Con	13	RHL_heterolat	0.0714286	0.0714286	0.115	0.28	22.2085	79.3162
Con	13	RHL_heterolat	0	0	0.175	0.355	19.4549	54.7707
Con	13	RHL_heterolat	1	0	0.135	0.29	20.2248	69.6924
Con	13	RHL_heterolat	0.0333333	0.0333333	0.13	0.305	20.148	66.0584
Con	13	RHL_heterolat	0.111111	0.111111	0.12	0.275	21.2962	77.4282
Con	13	RHL_heterolat	0.0869565	0.0869565	0.085	0.235	22.2179	94.623
Con	13	RHL_heterolat	0.0277778	0.0277778	0.195	0.37	18.4302	49.7641
Con	13	RHL_heterolat	0	0	0.145	0.315	19.8935	63.18
Con	14	RHL_heterolat	0.0625	0.0625	0.155	0.315	17.7106	56.1997
Con	14	RHL_heterolat	0.105263	0.105263	0.195	0.37	15.0026	40.5648
Con	14	RHL_heterolat	0.133333	0.133333	0.145	0.3	16.6546	55.5152
Con	14	RHL_heterolat	0.125	0.125	0.16	0.32	16.5648	51.765
Con	14	RHL_heterolat	0.916667	0.0833333	0.095	0.235	21.5207	91.6362
Con	14	RHL_heterolat	0	0	0.13	0.28	17.1627	61.3497
Con	14	RHL_heterolat	1	0	0.165	0.34	16.3876	48.2718
Con	14	RHL_heterolat	0	0	0.12	0.265	18.2965	68.9871
Con	14	RHL_heterolat	1	0	0.12	0.28	19.8884	71.0301
Con	15	RHL_heterolat	0.162791	0.162791	0.27	0.435	15.4905	35.608
Con	15	RHL_heterolat	0.209302	0.209302	0.215	0.42	15.8977	37.8551
Con	15	RHL_heterolat	0.232558	0.232558	0.255	0.425	15.7383	37.0263
Con	15	RHL_heterolat	0.0625	0.0625	0.165	0.34	16.8657	49.546
Con	15	RHL_heterolat	0.097561	0.097561	0.215	0.4	18.4036	46.0123
Con	15	RHL_heterolat	0.0357143	0.0357143	0.13	0.295	19.76	66.8873
Con	15	RHL_heterolat	0.0333333	0.0333333	0.125	0.3	20.4658	68.2193
Con	15	RHL_heterolat	0.03125	0.03125	0.16	0.33	20.5929	62.3797
Con	15	RHL_heterolat	0	0	0.135	0.305	18.7717	61.596
Con	15	RHL_heterolat	0.0714286	0.0714286	0.125	0.275	19.5139	71.0043
Con	15	RHL_heterolat	0.0384615	0.0384615	0.115	0.265	20.5484	77.5684
Con	16	RHL_heterolat	0.1	0.1	0.125	0.3	20.0506	66.8355
Con	16	RHL_heterolat	0.241379	0.241379	0.11	0.265	20.3026	76.9747
Con	16	RHL_heterolat	0.285714	0.285714	0.125	0.275	16.3824	59.5991
Con	16	RHL_heterolat	0.148148	0.148148	0.115	0.275	20.1729	73.382
Con	16	RHL_heterolat	0.241379	0.241379	0.115	0.275	18.3369	66.623
Con	16	RHL_heterolat	0.192308	0.192308	0.115	0.265	16.4092	61.9176
Con	16	RHL_heterolat	0.0930233	0.0930233	0.215	0.435	13.7054	31.504
Con	16	RHL_heterolat	0.148148	0.148148	0.11	0.265	20.6294	77.8646
Con	16	RHL_heterolat	0.09375	0.09375	0.135	0.325	16.1876	49.8378
Con	17	RHL_heterolat	0	0	0.155	0.335	19.4102	57.9452
Con	17	RHL_heterolat	1	0	0.165	0.325	17.2767	53.1165
Con	17	RHL_heterolat	0.111111	0.111111	0.11	0.265	19.3549	73.0416
Con	17	RHL_heterolat	0.972973	0.027027	0.135	0.32	17.8775	55.846
Con	17	RHL_heterolat	0.970588	0.0294118	0.155	0.34	17.8194	52.4101
Con	17	RHL_heterolat	0.972973	0.027027	0.17	0.36	16.8896	46.8979
Con	17	RHL_heterolat	0.958333	0.0416667	0.085	0.235	19.4247	82.6766
Con	17	RHL_heterolat	0.864865	0.135135	0.16	0.36	16.1033	44.9051
Con	17	RHL_heterolat	0	0	0.16	0.345	17.4171	50.5616
Con	17	RHL_heterolat	0.923077	0.0769231	0.105	0.255	19.3617	75.9507
Con	17	RHL_heterolat	0.965517	0.0344828	0.12	0.285	20.0853	70.4843
Con	18	RHL_heterolat	0.1	0.1	0.15	0.315	18.0146	57.1946
Con	18	RHL_heterolat	0.159091	0.159091	0.21	0.415	14.163	34.1871
Con	18	RHL_heterolat	0.3	0.3	0.275	0.46	12.2779	26.6111
Con	18	RHL_heterolat	0.133333	0.133333	0.145	0.3	18.7336	62.4453
Con	18	RHL_heterolat	0.0714286	0.0714286	0.12	0.29	17.8541	61.6271
Con	18	RHL_heterolat	0.09375	0.09375	0.155	0.31	18.1051	58.3723
Con	18	RHL_heterolat	1	0	0.105	0.245	19.7753	80.6976
Con	18	RHL_heterolat	0.96	0.04	0.105	0.24	19.6937	82.0478
Con	18	RHL_heterolat	0.965517	0.0344828	0.11	0.26	18.2656	70.2299
Con	18	RHL_heterolat	0	0	0.125	0.285	18.1077	63.5149
Dox	1	RHL_heterolat	0.0967742	0.0967742	0.145	0.31	19.266	62.1484
Dox	1	RHL_heterolat	0.1	0.1	0.145	0.3	16.7903	55.9675
Dox	1	RHL_heterolat	1	0	0.12	0.285	19.919	69.8793
Dox	1	RHL_heterolat	0.909091	0.0909091	0.115	0.27	19.9893	74.2401
Dox	1	RHL_heterolat	0.0909091	0.0909091	0.13	0.3	20.7143	69.1375
Dox	1	RHL_heterolat	0	0	0.12	0.295	22.0229	74.6506
Dox	2	RHL_heterolat	0.882353	0.117647	0.145	0.33	21.4673	65.0965
Dox	2	RHL_heterolat	0.9375	0.0625	0.13	0.31	21.096	68.0956
Dox	2	RHL_heterolat	0.0357143	0.0357143	0.125	0.29	20.5784	70.9587
Dox	2	RHL_heterolat	0.107143	0.107143	0.11	0.27	19.1408	70.7488
Dox	2	RHL_heterolat	0.925926	0.0740741	0.1	0.265	22.154	83.6664
Dox	2	RHL_heterolat	0.961538	0.0384615	0.1	0.255	19.8869	77.9228
Dox	2	RHL_heterolat	0.916667	0.0833333	0.095	0.235	21.0856	89.6871
Dox	2	RHL_heterolat	0.923077	0.0769231	0.1	0.255	21.0573	82.5906
Dox	2	RHL_heterolat	0.964286	0.0357143	0.105	0.255	17.5601	68.8612
Dox	7	RHL_heterolat	1	0	0.145	0.305	16.132	52.8573
Dox	7	RHL_heterolat	0.90625	0.09375	0.155	0.305	18.1761	59.6474
Dox	7	RHL_heterolat	0.0384615	0.0384615	0.115	0.265	18.2429	68.8343
Dox	7	RHL_heterolat	0.115385	0.115385	0.13	0.25	13.871	55.4553
Dox	7	RHL_heterolat	0.0384615	0.0384615	0.11	0.265	18.9518	71.5211
Dox	7	RHL_heterolat	0.16129	0.16129	0.135	0.29	16.4635	56.7858
Dox	7	RHL_heterolat	0.282051	0.282051	0.18	0.34	15.4826	45.5842
Dox	8	RHL_heterolat	0.0625	0.0625	0.165	0.325	16.9839	52.271
Dox	8	RHL_heterolat	0.0540541	0.0540541	0.2	0.37	15.5716	42.0855
Dox	8	RHL_heterolat	0.125	0.125	0.135	0.305	18.9045	62.0084
Dox	8	RHL_heterolat	0.111111	0.111111	0.115	0.275	18.1321	65.9528
Dox	8	RHL_heterolat	1	0	0.12	0.29	18.8401	64.9919
Dox	8	RHL_heterolat	0.939394	0.0606061	0.135	0.31	17.9286	57.867
Dox	8	RHL_heterolat	0.027027	0.027027	0.165	0.38	14.8326	39.0262
Dox	8	RHL_heterolat	0.0909091	0.0909091	0.17	0.32	14.6027	45.6297
Dox	8	RHL_heterolat	0.105263	0.105263	0.2	0.375	13.7082	36.5495
Dox	8	RHL_heterolat	0.125	0.125	0.21	0.395	15.2538	38.6123
Dox	9	RHL_heterolat	0.0294118	0.0294118	0.185	0.34	15.7404	46.2952
Dox	9	RHL_heterolat	0.111111	0.111111	0.175	0.345	16.3256	47.3206
Dox	9	RHL_heterolat	0.105263	0.105263	0.225	0.38	13.9438	36.6943
Dox	9	RHL_heterolat	0.0384615	0.0384615	0.11	0.26	18.8634	72.5514
Dox	9	RHL_heterolat	0.0769231	0.0769231	0.11	0.255	17.8177	69.8624
Dox	9	RHL_heterolat	0.909091	0.0909091	0.155	0.32	14.9727	46.812
Dox	9	RHL_heterolat	0	0	0.14	0.315	16.5229	52.5984
Dox	9	RHL_heterolat	0.0333333	0.0333333	0.165	0.315	14.3674	45.5931
Dox	9	RHL_heterolat	0.0666667	0.0666667	0.15	0.295	16.4046	55.6049
Dox	9	RHL_heterolat	0.0740741	0.0740741	0.125	0.27	16.5099	61.1476
Dox	10	RHL_heterolat	0.037037	0.037037	0.135	0.28	18.1907	65.0676
Dox	10	RHL_heterolat	0.965517	0.0344828	0.135	0.285	17.9701	62.9606
Dox	10	RHL_heterolat	0.0689655	0.0689655	0.12	0.275	19.0037	69.1313
Dox	10	RHL_heterolat	0.0454545	0.0454545	0.095	0.235	20.105	85.8347
Dox	10	RHL_heterolat	0.2	0.2	0.09	0.23	20.6451	89.9703
Dox	10	RHL_heterolat	0	0	0.09	0.235	20.0973	85.4928
Dox	10	RHL_heterolat	1	0	0.09	0.21	16.9319	80.8271
Dox	10	RHL_heterolat	0.125	0.125	0.105	0.24	19.6322	81.801
Dox	10	RHL_heterolat	0.136364	0.136364	0.09	0.22	17.7105	80.5022
Dox	10	RHL_heterolat	0.952381	0.047619	0.095	0.23	18.6199	80.9533
Dox	10	RHL_heterolat	0.782609	0.217391	0.105	0.23	17.7121	77.0092
Dox	12	RHL_heterolat	0.148148	0.148148	0.12	0.265	19.551	73.8638
Dox	12	RHL_heterolat	1	0	0.09	0.24	19.7266	82.1785
Dox	12	RHL_heterolat	0.153846	0.153846	0.14	0.285	12.7038	44.519
Dox	12	RHL_heterolat	0.1875	0.1875	0.135	0.3	16.7817	55.9591
Dox	12	RHL_heterolat	0.2	0.2	0.13	0.3	12.0583	40.1942
Dox	13	RHL_heterolat	0.0357143	0.0357143	0.16	0.305	17.1169	56.0805
Dox	13	RHL_heterolat	0.133333	0.133333	0.12	0.285	21.2993	74.7855
Dox	13	RHL_heterolat	0.0645161	0.0645161	0.155	0.31	18.451	59.5194
Dox	13	RHL_heterolat	0	0	0.12	0.315	17.6639	56.6715
Dox	13	RHL_heterolat	0	0	0.11	0.24	18.7143	78.9331
Dox	13	RHL_heterolat	0.142857	0.142857	0.125	0.28	18.2958	65.3421
Dox	13	RHL_heterolat	0.852941	0.147059	0.145	0.305	20.23	66.7367
Dox	13	RHL_heterolat	0.0882353	0.0882353	0.175	0.355	14.5538	40.9827
Dox	13	RHL_heterolat	0.0333333	0.0333333	0.165	0.31	16.8715	54.3808
Dox	14	RHL_heterolat	0.03125	0.03125	0.16	0.32	17.9573	56.1166
Dox	14	RHL_heterolat	0.0740741	0.0740741	0.12	0.265	18.5252	69.9241
Dox	14	RHL_heterolat	0	0	0.115	0.255	16.9448	66.3637
Dox	14	RHL_heterolat	1	0	0.1	0.255	20.9059	81.9938
Dox	14	RHL_heterolat	0	0	0.085	0.22	20.3423	92.3985
Dox	14	RHL_heterolat	1	0	0.07	0.22	21.9472	99.8191
Dox	14	RHL_heterolat	0.08	0.08	0.11	0.26	19.2695	74.1648
Dox	14	RHL_heterolat	0.166667	0.166667	0.1	0.23	18.5028	80.4046
Dox	14	RHL_heterolat	0.0882353	0.0882353	0.195	0.335	15.0288	44.8983
Dox	14	RHL_heterolat	0.0357143	0.0357143	0.145	0.29	17.919	61.7832
Dox	15	RHL_heterolat	0	0	0.095	0.235	20.562	87.5426
Dox	15	RHL_heterolat	0.214286	0.214286	0.085	0.255	26.6834	104.456
Dox	15	RHL_heterolat	0.913043	0.0869565	0.085	0.235	21.9991	93.6935
Dox	15	RHL_heterolat	0.935484	0.0645161	0.12	0.27	17.8975	66.4038
Dox	15	RHL_heterolat	0.193548	0.193548	0.205	0.365	14.3009	39.1642
Dox	15	RHL_heterolat	0.789474	0.210526	0.065	0.205	20.6261	100.999
Dox	16	RHL_heterolat	0.25	0.25	0.085	0.235	19.4259	82.6335
Dox	16	RHL_heterolat	0.166667	0.166667	0.095	0.25	16.1834	64.745
Dox	16	RHL_heterolat	0.967742	0.0322581	0.115	0.29	17.3517	59.8152
Dox	16	RHL_heterolat	0.0322581	0.0322581	0.115	0.3	15.141	50.4127
Dox	16	RHL_heterolat	0.714286	0.285714	0.115	0.24	16.2529	67.325
Dox	16	RHL_heterolat	0.714286	0.285714	0.12	0.255	18.6886	73.6792
Dox	16	RHL_heterolat	0.178571	0.178571	0.115	0.27	15.6351	57.9407
Dox	16	RHL_heterolat	0.172414	0.172414	0.135	0.29	17.346	59.8137
Dox	16	RHL_heterolat	0.26087	0.26087	0.075	0.225	21.0841	93.6583
Dox	16	RHL_heterolat	0.238095	0.238095	0.08	0.215	17.2489	80.226
Dox	17	RHL_heterolat	0.0344828	0.0344828	0.13	0.29	18.4566	63.6434
Dox	17	RHL_heterolat	0.037037	0.037037	0.115	0.27	18.6189	68.959
Dox	17	RHL_heterolat	0.6875	0.3125	0.18	0.365	13.183	36.9371
Dox	17	RHL_heterolat	0.536585	0.463415	0.23	0.365	13.0082	36.4605
Dox	17	RHL_heterolat	0.208333	0.208333	0.065	0.22	21.9506	99.7259
Dox	17	RHL_heterolat	0.870968	0.129032	0.11	0.285	18.7864	66.3347
Dox	17	RHL_heterolat	0.0322581	0.0322581	0.1	0.265	17.8559	67.641
Dox	18	RHL_heterolat	0.142857	0.142857	0.08	0.22	19.6901	89.587
Dox	18	RHL_heterolat	0.2	0.2	0.07	0.195	22.5404	115.467
Dox	18	RHL_heterolat	0.944444	0.0555556	0.07	0.205	21.3194	103.786
Dox	18	RHL_heterolat	0.166667	0.166667	0.19	0.33	12.967	39.194
Dox	18	RHL_heterolat	0.162162	0.162162	0.215	0.365	11.6966	32.0383
Dox	18	RHL_heterolat	0	0	0.205	0.38	12.3631	32.5731
Dox	18	RHL_heterolat	0.236842	0.236842	0.21	0.37	12.0554	32.6043
Dox	18	RHL_heterolat	0.0588235	0.0588235	0.215	0.375	14.8321	39.5884
Dox	18	RHL_heterolat	0.28125	0.28125	0.16	0.32	16.1245	50.389
Dox	1	RHL_heterolat	0.575758	0.424242	0.165	0.315	18.0333	57.4741
Dox	1	RHL_heterolat	0.607143	0.392857	0.13	0.285	18.2936	64.2238
Dox	1	RHL_heterolat	0.0625	0.0625	0.19	0.34	16.1164	47.3125
Dox	1	RHL_heterolat	0.037037	0.037037	0.135	0.275	18.2912	66.541
Dox	1	RHL_heterolat	0.129032	0.129032	0.155	0.305	18.1207	59.3988
Dox	1	RHL_heterolat	0.0909091	0.0909091	0.175	0.335	18.2929	54.6166
Dox	1	RHL_heterolat	0.0606061	0.0606061	0.17	0.33	16.8656	51.1078
Dox	1	RHL_heterolat	0.0909091	0.0909091	0.165	0.325	17.3303	53.308
Dox	1	RHL_heterolat	0.206897	0.206897	0.135	0.28	18.2054	65.0044
Dox	1	RHL_heterolat	0.172414	0.172414	0.145	0.295	17.154	58.1541
Dox	2	RHL_heterolat	0.0344828	0.0344828	0.13	0.295	19.7572	66.9511
Dox	2	RHL_heterolat	0.0967742	0.0967742	0.145	0.3	19.751	65.8222
Dox	2	RHL_heterolat	0	0	0.235	0.405	17.0987	42.165
Dox	2	RHL_heterolat	1	0	0.16	0.325	18.236	56.1104
Dox	2	RHL_heterolat	0.0285714	0.0285714	0.17	0.35	16.7394	47.8268
Dox	2	RHL_heterolat	0.0243902	0.0243902	0.235	0.41	13.83	33.7317
Dox	2	RHL_heterolat	0.228571	0.228571	0.17	0.315	14.8596	47.3587
Dox	2	RHL_heterolat	0.037037	0.037037	0.15	0.305	16.8431	55.3091
Dox	2	RHL_heterolat	0.942857	0.0571429	0.165	0.345	17.8275	51.68
Dox	2	RHL_heterolat	0.97619	0.0238095	0.215	0.425	16.7861	39.5116
Dox	7	RHL_heterolat	0	0	0.135	0.3	18.8268	62.8253
Dox	7	RHL_heterolat	0.852941	0.147059	0.24	0.44	13.645	30.9168
Dox	7	RHL_heterolat	0.0294118	0.0294118	0.16	0.31	18.3787	59.5289
Dox	7	RHL_heterolat	0.102564	0.102564	0.235	0.365	11.6531	32.1648
Dox	7	RHL_heterolat	0.0540541	0.0540541	0.215	0.37	11.6307	31.4343
Dox	7	RHL_heterolat	0.027027	0.027027	0.215	0.375	13.2519	35.3398
Dox	7	RHL_heterolat	0.147059	0.147059	0.18	0.32	12.3363	38.7418
Dox	7	RHL_heterolat	0.0769231	0.0769231	0.12	0.265	17.5951	66.437
Dox	7	RHL_heterolat	0.166667	0.166667	0.14	0.285	14.6064	51.1761
Dox	8	RHL_heterolat	0.108108	0.108108	0.19	0.365	13.2016	36.1692
Dox	8	RHL_heterolat	0.0967742	0.0967742	0.17	0.315	16.8103	53.3994
Dox	8	RHL_heterolat	0.0434783	0.0434783	0.105	0.24	18.6805	77.9364
Dox	8	RHL_heterolat	0.111111	0.111111	0.11	0.26	17.5332	67.5107
Dox	8	RHL_heterolat	0.193548	0.193548	0.125	0.285	15.4403	54.827
Dox	8	RHL_heterolat	0.178571	0.178571	0.14	0.28	14.7273	52.5974
Dox	8	RHL_heterolat	0.171429	0.171429	0.165	0.325	12.2577	37.6321
Dox	8	RHL_heterolat	0.0606061	0.0606061	0.195	0.35	16.6922	47.6435
Dox	8	RHL_heterolat	0.9375	0.0625	0.15	0.305	17.1455	56.1826
Dox	9	RHL_heterolat	0.12	0.12	0.095	0.24	17.9499	74.8397
Dox	9	RHL_heterolat	1	0	0.085	0.205	15.4831	75.3746
Dox	9	RHL_heterolat	0.65	0.35	0.085	0.19	16.7073	87.745
Dox	9	RHL_heterolat	0.227273	0.227273	0.1	0.225	15.1729	67.427
Dox	9	RHL_heterolat	0.814815	0.185185	0.13	0.25	15.1393	60.6714
Dox	9	RHL_heterolat	0.896552	0.103448	0.145	0.27	14.8168	55.092
Dox	9	RHL_heterolat	0.933333	0.0666667	0.145	0.285	17.6088	61.8542
Dox	10	RHL_heterolat	0.0833333	0.0833333	0.105	0.24	19.0956	79.5651
Dox	10	RHL_heterolat	0	0	0.11	0.25	20.0107	80.0958
Dox	10	RHL_heterolat	0.0357143	0.0357143	0.12	0.285	18.7037	65.6392
Dox	10	RHL_heterolat	0.171429	0.171429	0.16	0.325	17.2595	53.1586
Dox	10	RHL_heterolat	0.25	0.25	0.095	0.23	18.392	80.5184
Dox	10	RHL_heterolat	0.272727	0.272727	0.085	0.215	20.2581	94.1663
Dox	10	RHL_heterolat	0.388889	0.388889	0.07	0.18	18.9068	105.038
Dox	10	RHL_heterolat	0.380952	0.380952	0.08	0.205	19.5621	95.4145
Dox	10	RHL_heterolat	0.111111	0.111111	0.11	0.27	19.2249	71.2034
Dox	12	RHL_heterolat	0.125	0.125	0.095	0.23	15.848	68.8125
Dox	12	RHL_heterolat	0.142857	0.142857	0.16	0.33	15.4834	46.9527
Dox	12	RHL_heterolat	0.125	0.125	0.225	0.4	15.1429	37.8573
Dox	12	RHL_heterolat	0.0555556	0.0555556	0.205	0.36	12.7991	35.553
Dox	12	RHL_heterolat	0.95122	0.0487805	0.19	0.38	13.9506	36.8525
Dox	12	RHL_heterolat	0.0487805	0.0487805	0.205	0.39	12.3792	31.6556
Dox	12	RHL_heterolat	0	0	0.08	0.22	18.5412	84.5151
Dox	12	RHL_heterolat	1	0	0.09	0.235	17.558	74.6144
Dox	13	RHL_heterolat	0.0416667	0.0416667	0.11	0.26	17.3119	66.7126
Dox	13	RHL_heterolat	0.153846	0.153846	0.105	0.255	17.4202	68.3695
Dox	13	RHL_heterolat	0.136364	0.136364	0.085	0.225	17.1293	76.1653
Dox	13	RHL_heterolat	0.2	0.2	0.105	0.24	16.8623	70.2806
Dox	13	RHL_heterolat	0.105263	0.105263	0.07	0.19	18.4258	96.9778
Dox	14	RHL_heterolat	0.151515	0.151515	0.165	0.315	15.9257	50.6195
Dox	14	RHL_heterolat	1	0	0.09	0.245	19.9697	81.5149
Dox	14	RHL_heterolat	0.0930233	0.0930233	0.245	0.415	13.713	33.2812
Dox	14	RHL_heterolat	0.0526316	0.0526316	0.2	0.325	13.9101	43.5796
Dox	14	RHL_heterolat	0.0454545	0.0454545	0.085	0.225	19.0404	84.7065
Dox	14	RHL_heterolat	0.0833333	0.0833333	0.09	0.24	17.9842	74.9341
Dox	14	RHL_heterolat	0.115385	0.115385	0.095	0.255	15.182	59.4425
Dox	15	RHL_heterolat	0.0869565	0.0869565	0.095	0.23	17.7179	77.0343
Dox	15	RHL_heterolat	0.857143	0.142857	0.08	0.215	20.7743	96.5456
Dox	15	RHL_heterolat	0.809524	0.190476	0.085	0.205	18.8084	91.6765
Dox	15	RHL_heterolat	1	0	0.18	0.33	17.9513	54.398
Dox	15	RHL_heterolat	0.333333	0.333333	0.085	0.19	17.1815	90.1723
Dox	15	RHL_heterolat	0.363636	0.363636	0.085	0.215	20.6774	96.1334
Dox	16	RHL_heterolat	0.142857	0.142857	0.125	0.285	20.0179	70.2148
Dox	16	RHL_heterolat	0.178571	0.178571	0.125	0.275	17.9269	65.1724
Dox	16	RHL_heterolat	0.266667	0.266667	0.145	0.285	13.7836	48.3508
Dox	16	RHL_heterolat	0.0769231	0.0769231	0.11	0.27	19.8681	73.6093
Dox	16	RHL_heterolat	0.153846	0.153846	0.095	0.25	20.0047	79.9972
Dox	16	RHL_heterolat	0.263158	0.263158	0.085	0.21	17.999	85.1101
Dox	16	RHL_heterolat	0.333333	0.333333	0.08	0.23	22.4661	97.0512
Dox	17	RHL_heterolat	0.0322581	0.0322581	0.155	0.315	17.4573	55.4138
Dox	17	RHL_heterolat	0.0333333	0.0333333	0.14	0.3	19.7205	65.7349
Dox	17	RHL_heterolat	1	0	0.085	0.235	21.5792	91.968
Dox	17	RHL_heterolat	0.04	0.04	0.1	0.25	19.1007	76.4029
Dox	17	RHL_heterolat	0.227273	0.227273	0.08	0.2	19.1491	95.9286
Dox	17	RHL_heterolat	0.285714	0.285714	0.075	0.205	19.8403	96.8022
Dox	18	RHL_heterolat	1	0	0.095	0.225	20.5719	91.4272
Dox	18	RHL_heterolat	1	0	0.095	0.24	19.2851	80.2327
Dox	18	RHL_heterolat	0.115385	0.115385	0.115	0.26	18.6721	71.8159
Dox	18	RHL_heterolat	0.125	0.125	0.11	0.24	16.1693	67.3721
Dox	18	RHL_heterolat	0.08	0.08	0.1	0.25	19.6373	78.5491
Dox	18	RHL_heterolat	0.16	0.16	0.1	0.24	17.8551	74.3432
Dox	18	RHL_heterolat	0.047619	0.047619	0.085	0.22	20.9766	95.4307
Dox	18	RHL_heterolat	0.0909091	0.0909091	0.075	0.215	21.1532	98.3676
Dox	18	RHL_heterolat	0.315789	0.315789	0.065	0.19	22.8698	120.367
Dox	1	RHL_heterolat	0.441176	0.441176	0.165	0.34	19.5924	57.6248
Dox	1	RHL_heterolat	0.441176	0.441176	0.155	0.32	20.416	64.0523
Dox	1	RHL_heterolat	1	0	0.145	0.325	20.0951	61.9444
Dox	1	RHL_heterolat	0.918919	0.0810811	0.155	0.34	17.0639	50.1264
Dox	1	RHL_heterolat	0	0	0.18	0.365	20.1296	55.1404
Dox	1	RHL_heterolat	1	0	0.13	0.305	20.1072	65.9076
Dox	1	RHL_heterolat	0.119048	0.119048	0.25	0.42	15.2878	36.3995
Dox	1	RHL_heterolat	0.953488	0.0465116	0.215	0.405	16.9267	41.776
Dox	2	RHL_heterolat	0	0	0.115	0.26	18.0119	69.3727
Dox	2	RHL_heterolat	1	0	0.16	0.33	16.2239	49.1874
Dox	2	RHL_heterolat	1	0	0.11	0.27	21.2746	78.7949
Dox	2	RHL_heterolat	1	0	0.11	0.265	18.839	71.0962
Dox	2	RHL_heterolat	0.962963	0.037037	0.115	0.265	16.546	62.3724
Dox	2	RHL_heterolat	0.0434783	0.0434783	0.09	0.235	20.2611	86.2706
Dox	2	RHL_heterolat	0	0	0.13	0.285	18.6085	65.4235
Dox	2	RHL_heterolat	1	0	0.11	0.255	18.3206	71.8094
Dox	7	RHL_heterolat	0	0	0.14	0.295	17.2693	58.5471
Dox	7	RHL_heterolat	1	0	0.13	0.29	17.6237	60.7715
Dox	7	RHL_heterolat	0.108108	0.108108	0.205	0.37	15.1279	40.8863
Dox	7	RHL_heterolat	0.135135	0.135135	0.21	0.365	13.6332	37.3228
Dox	7	RHL_heterolat	0.0909091	0.0909091	0.185	0.335	12.552	37.4564
Dox	7	RHL_heterolat	0.138889	0.138889	0.2	0.35	14.3368	40.9403
Dox	7	RHL_heterolat	1	0	0.18	0.36	16.9602	47.1116
Dox	8	RHL_heterolat	0.0857143	0.0857143	0.185	0.345	13.9304	40.3961
Dox	8	RHL_heterolat	0.964286	0.0357143	0.105	0.265	21.1733	79.9358
Dox	8	RHL_heterolat	0.09375	0.09375	0.16	0.33	14.6698	44.4756
Dox	8	RHL_heterolat	0.102564	0.102564	0.225	0.385	15.2051	39.4846
Dox	8	RHL_heterolat	0.139535	0.139535	0.25	0.405	11.7156	28.9196
Dox	8	RHL_heterolat	0.0555556	0.0555556	0.2	0.38	15.5628	40.9118
Dox	8	RHL_heterolat	0.102564	0.102564	0.195	0.38	14.6359	38.4149
Dox	8	RHL_heterolat	0.0571429	0.0571429	0.185	0.345	14.6604	42.4934
Dox	8	RHL_heterolat	0.0645161	0.0645161	0.155	0.31	17.6905	57.0662
Dox	9	RHL_heterolat	0.08	0.08	0.115	0.25	17.0844	68.3374
Dox	9	RHL_heterolat	0.0714286	0.0714286	0.125	0.28	17.886	63.8786
Dox	9	RHL_heterolat	0.866667	0.133333	0.06	0.17	18.3417	108.879
Dox	9	RHL_heterolat	0.684211	0.315789	0.08	0.185	16.3593	88.2906
Dox	9	RHL_heterolat	0.714286	0.285714	0.08	0.2	17.8875	89.6114
Dox	9	RHL_heterolat	0.111111	0.111111	0.14	0.28	15.8059	56.4517
Dox	9	RHL_heterolat	0.0689655	0.0689655	0.135	0.295	15.7178	53.2751
Dox	9	RHL_heterolat	0.411765	0.411765	0.075	0.175	17.1798	98.3646
Dox	10	RHL_heterolat	0.92	0.08	0.085	0.235	21.8612	93.2596
Dox	10	RHL_heterolat	0.25	0.25	0.085	0.22	18.2577	79.2941
Dox	10	RHL_heterolat	0.368421	0.368421	0.065	0.195	19.3112	101.638
Dox	12	RHL_heterolat	0.2	0.2	0.07	0.2	20.1377	100.689
Dox	12	RHL_heterolat	1	0	0.1	0.25	19.643	78.686
Dox	12	RHL_heterolat	0.0769231	0.0769231	0.1	0.245	18.1153	74.16
Dox	12	RHL_heterolat	0.916667	0.0833333	0.095	0.24	19.8569	82.737
Dox	12	RHL_heterolat	0.913043	0.0869565	0.09	0.23	20.3343	88.4101
Dox	12	RHL_heterolat	0.0833333	0.0833333	0.205	0.365	14.3011	39.1471
Dox	12	RHL_heterolat	0.0689655	0.0689655	0.15	0.295	14.9872	50.8215
Dox	12	RHL_heterolat	0.136364	0.136364	0.28	0.44	11.3165	25.7193
Dox	12	RHL_heterolat	0.170732	0.170732	0.215	0.405	14.6287	36.1121
Dox	13	RHL_heterolat	0.0344828	0.0344828	0.13	0.295	18.6117	63.0668
Dox	13	RHL_heterolat	0.142857	0.142857	0.11	0.265	20.6531	77.8933
Dox	13	RHL_heterolat	0.153846	0.153846	0.27	0.465	14.2812	31.4037
Dox	13	RHL_heterolat	0.0588235	0.0588235	0.335	0.5	13.384	26.8302
Dox	13	RHL_heterolat	0.0344828	0.0344828	0.165	0.325	17.8119	55.1731
Dox	13	RHL_heterolat	0.974359	0.025641	0.21	0.37	16.5464	44.8424
Dox	13	RHL_heterolat	0.0769231	0.0769231	0.145	0.33	13.8895	42.394
Dox	14	RHL_heterolat	0.08	0.08	0.125	0.265	17.9297	67.6587
Dox	14	RHL_heterolat	0.111111	0.111111	0.115	0.265	19.0591	71.9428
Dox	14	RHL_heterolat	0.818182	0.181818	0.09	0.22	21.7394	98.8155
Dox	14	RHL_heterolat	0.965517	0.0344828	0.145	0.3	18.7899	62.6326
Dox	14	RHL_heterolat	0.892857	0.107143	0.115	0.275	19.5142	70.9578
Dox	14	RHL_heterolat	0	0	0.085	0.23	20.9156	91.1175
Dox	14	RHL_heterolat	0.037037	0.037037	0.125	0.27	17.7057	65.5765
Dox	14	RHL_heterolat	0.0384615	0.0384615	0.125	0.26	17.1379	65.9151
Dox	15	RHL_heterolat	0.923077	0.0769231	0.1	0.245	20.4371	83.4124
Dox	15	RHL_heterolat	0	0	0.1	0.25	20.1564	80.5841
Dox	15	RHL_heterolat	0.272727	0.272727	0.065	0.225	27.1241	120.637
Dox	15	RHL_heterolat	0.285714	0.285714	0.06	0.2	25.9741	130.109
Dox	15	RHL_heterolat	0	0	0.11	0.27	18.8857	70.0866
Dox	15	RHL_heterolat	1	0	0.1	0.26	18.6981	72.1267
Dox	15	RHL_heterolat	0.16	0.16	0.095	0.24	20.0601	83.6559
Dox	15	RHL_heterolat	0.181818	0.181818	0.085	0.22	16.5179	75.0812
Dox	15	RHL_heterolat	0.24	0.24	0.085	0.24	24.5677	102.135
Dox	16	RHL_heterolat	0.0454545	0.0454545	0.085	0.23	21.7184	94.5074
Dox	16	RHL_heterolat	0.16	0.16	0.08	0.235	21.6082	92.0922
Dox	16	RHL_heterolat	0.166667	0.166667	0.085	0.235	20.7617	88.3449
Dox	16	RHL_heterolat	0.2	0.2	0.095	0.245	17.6342	71.9572
Dox	16	RHL_heterolat	0.171429	0.171429	0.195	0.34	13.173	38.7827
Dox	16	RHL_heterolat	0.142857	0.142857	0.195	0.355	14.8973	41.9625
Dox	16	RHL_heterolat	0.176471	0.176471	0.17	0.335	17.1003	51.0321
Dox	16	RHL_heterolat	0.0285714	0.0285714	0.16	0.32	17.906	56.0164
Dox	17	RHL_heterolat	1	0	0.085	0.235	20.8922	88.9332
Dox	17	RHL_heterolat	0.961538	0.0384615	0.09	0.245	22.1521	90.6505
Dox	17	RHL_heterolat	0.9	0.1	0.075	0.205	21.9624	107.189
Dox	17	RHL_heterolat	0.914286	0.0857143	0.175	0.345	18.2538	52.9164
Dox	17	RHL_heterolat	0.9375	0.0625	0.135	0.305	17.5982	57.7167
Dox	17	RHL_heterolat	0	0	0.08	0.22	20.2399	92.1071
Dox	17	RHL_heterolat	1	0	0.095	0.25	20.8129	83.2721
Dox	18	RHL_heterolat	0.111111	0.111111	0.125	0.275	18.5119	67.298
Dox	18	RHL_heterolat	0.0833333	0.0833333	0.105	0.245	19.7305	80.5617
Dox	18	RHL_heterolat	1	0	0.075	0.215	21.6606	100.732
Dox	18	RHL_heterolat	0.952381	0.047619	0.07	0.205	19.9653	97.3841
Dox	18	RHL_heterolat	0.0526316	0.0526316	0.08	0.21	20.0731	95.5139
Dox	18	RHL_heterolat	0	0	0.075	0.205	22.5825	110.271
Dox	18	RHL_heterolat	0.16	0.16	0.105	0.255	18.1609	71.211
Dox	18	RHL_heterolat	0.181818	0.181818	0.075	0.215	19.5068	90.8024
Dox	18	RHL_heterolat	0.368421	0.368421	0.065	0.19	20.8791	109.89
Dox	1	RHL_heterolat	0	0	0.145	0.34	20.1671	59.3927
Dox	1	RHL_heterolat	0.133333	0.133333	0.25	0.43	15.0112	38.3203
Dox	1	RHL_heterolat	1	0	0.135	0.31	20.4724	60.4417
Dox	2	RHL_heterolat	0	0	0.135	0.295	19.2557	65.2846
Dox	2	RHL_heterolat	0.0714286	0.0714286	0.135	0.29	18.8788	65.0697
Dox	2	RHL_heterolat	0	0	0.095	0.255	19.2607	75.5683
Dox	2	RHL_heterolat	1	0	0.14	0.325	17.5058	53.8672
Dox	2	RHL_heterolat	0.972222	0.0277778	0.16	0.36	17.1396	47.6357
Dox	2	RHL_heterolat	0.0833333	0.0833333	0.155	0.34	18.5463	54.5024
Dox	2	RHL_heterolat	0.15625	0.15625	0.145	0.305	16.1264	52.8565
Dox	2	RHL_heterolat	0.941176	0.0588235	0.165	0.325	19.0091	58.7365
Dox	7	RHL_heterolat	0.0384615	0.0384615	0.12	0.28	19.1472	68.5816
Dox	7	RHL_heterolat	0.212121	0.212121	0.17	0.32	14.1185	44.1576
Dox	7	RHL_heterolat	0.172414	0.172414	0.155	0.3	15.3364	51.0977
Dox	7	RHL_heterolat	0.225806	0.225806	0.145	0.3	15.3672	51.2038
Dox	7	RHL_heterolat	0.875	0.125	0.265	0.46	17.1402	37.3735
Dox	7	RHL_heterolat	0.941176	0.0588235	0.155	0.335	18.5395	55.3506
Dox	7	RHL_heterolat	0.142857	0.142857	0.115	0.27	19.0328	70.5165
Dox	7	RHL_heterolat	0.16	0.16	0.1	0.25	18.4762	73.9047
Dox	7	RHL_heterolat	0.2	0.2	0.085	0.24	21.73	90.4006
Dox	7	RHL_heterolat	0.181818	0.181818	0.09	0.225	17.3076	76.958
Dox	8	RHL_heterolat	0.966667	0.0333333	0.125	0.305	19.1959	62.9129
Dox	8	RHL_heterolat	0.935484	0.0645161	0.125	0.285	19.4712	68.3555
Dox	8	RHL_heterolat	0.0769231	0.0769231	0.1	0.255	20.4289	80.1633
Dox	8	RHL_heterolat	0	0	0.135	0.3	18.6384	62.1382
Dox	8	RHL_heterolat	1	0	0.145	0.31	15.608	50.3564
Dox	8	RHL_heterolat	0.107143	0.107143	0.125	0.275	18.1206	65.8834
Dox	8	RHL_heterolat	0.12	0.12	0.1	0.25	18.1713	72.6853
Dox	8	RHL_heterolat	0.12	0.12	0.1	0.245	19.2798	78.7071
Dox	8	RHL_heterolat	0.0454545	0.0454545	0.085	0.23	19.8219	86.2864
Dox	9	RHL_heterolat	0.0869565	0.0869565	0.1	0.24	19.5095	81.3922
Dox	9	RHL_heterolat	0.25	0.25	0.07	0.195	25.0078	128.283
Dox	9	RHL_heterolat	0.794872	0.205128	0.12	0.335	15.3755	46.1368
Dox	9	RHL_heterolat	0.190476	0.190476	0.075	0.215	22.9423	106.843
Dox	9	RHL_heterolat	0.870968	0.129032	0.145	0.28	16.97	60.315
Dox	9	RHL_heterolat	0.130435	0.130435	0.105	0.23	18.5151	80.5004
Dox	9	RHL_heterolat	0.0967742	0.0967742	0.17	0.31	15.1266	48.7956
Dox	9	RHL_heterolat	0.3	0.3	0.065	0.19	20.78	109.468
Dox	9	RHL_heterolat	0.973684	0.0263158	0.165	0.365	14.9234	40.8218
Dox	10	RHL_heterolat	0.863636	0.136364	0.075	0.205	21.9873	107.936
Dox	10	RHL_heterolat	0.95	0.05	0.095	0.2	15.8977	79.4887
Dox	10	RHL_heterolat	0.85	0.15	0.09	0.2	17.774	88.8702
Dox	10	RHL_heterolat	0.708333	0.291667	0.105	0.24	20.0093	83.3719
Dox	10	RHL_heterolat	0.87234	0.12766	0.21	0.35	14.5034	45.2216
Dox	10	RHL_heterolat	0.277778	0.277778	0.06	0.18	25.967	144.261
Dox	10	RHL_heterolat	0.35	0.35	0.075	0.195	25.8153	132.222
Dox	10	RHL_heterolat	0.5	0.5	0.06	0.17	23.6002	139.261
Dox	10	RHL_heterolat	0.208333	0.208333	0.09	0.245	17.0934	69.7677
Dox	10	RHL_heterolat	0.2	0.2	0.155	0.295	14.2807	48.428
Dox	12	RHL_heterolat	0	0	0.145	0.295	16.379	55.4892
Dox	12	RHL_heterolat	1	0	0.105	0.265	21.0888	79.5642
Dox	12	RHL_heterolat	0.923077	0.0769231	0.09	0.25	21.3574	85.6517
Dox	12	RHL_heterolat	1	0	0.075	0.225	20.7884	92.4414
Dox	12	RHL_heterolat	0.04	0.04	0.1	0.255	20.1366	78.9451
Dox	12	RHL_heterolat	0.0869565	0.0869565	0.085	0.23	23.5932	102.579
Dox	12	RHL_heterolat	0.714286	0.285714	0.075	0.205	21.8391	106.518
Dox	12	RHL_heterolat	0.958333	0.0416667	0.08	0.235	22.9455	97.6108
Dox	13	RHL_heterolat	0.928571	0.0714286	0.105	0.265	23.3011	88.0642
Dox	13	RHL_heterolat	0.964286	0.0357143	0.11	0.28	22.5909	80.6819
Dox	13	RHL_heterolat	0.972222	0.0277778	0.18	0.35	17.4993	50.0933
Dox	13	RHL_heterolat	0.0606061	0.0606061	0.155	0.325	20.8971	64.2949
Dox	13	RHL_heterolat	0.964286	0.0357143	0.115	0.275	21.239	77.2506
Dox	13	RHL_heterolat	0.962963	0.037037	0.125	0.29	22.0982	76.1958
Dox	13	RHL_heterolat	0.0740741	0.0740741	0.09	0.255	20.8142	81.6881
Dox	13	RHL_heterolat	0.027027	0.027027	0.21	0.395	18.941	47.9987
Dox	13	RHL_heterolat	0.964286	0.0357143	0.1	0.275	22.2417	80.8393
Dox	14	RHL_heterolat	0.0714286	0.0714286	0.145	0.28	16.7886	59.9594
Dox	14	RHL_heterolat	0.0606061	0.0606061	0.17	0.33	17.0627	51.7051
Dox	14	RHL_heterolat	0	0	0.13	0.29	17.7969	61.3159
Dox	14	RHL_heterolat	1	0	0.115	0.275	19.5032	70.924
Dox	14	RHL_heterolat	0.0666667	0.0666667	0.125	0.3	16.7172	55.7241
Dox	14	RHL_heterolat	0.925926	0.0740741	0.12	0.265	18.383	69.3575
Dox	14	RHL_heterolat	0.966667	0.0333333	0.14	0.29	18.706	64.5751
Dox	14	RHL_heterolat	0.047619	0.047619	0.265	0.445	14.5989	32.7145
Dox	14	RHL_heterolat	0.0625	0.0625	0.265	0.435	15.0399	34.8286
Dox	15	RHL_heterolat	0.965517	0.0344828	0.125	0.285	19.1591	67.1974
Dox	15	RHL_heterolat	0.030303	0.030303	0.16	0.33	20.108	60.9332
Dox	15	RHL_heterolat	0	0	0.15	0.325	20.0114	61.5788
Dox	15	RHL_heterolat	0.238095	0.238095	0.07	0.205	21.0384	102.602
Dox	15	RHL_heterolat	0.941176	0.0588235	0.145	0.335	18.6038	55.5308
Dox	15	RHL_heterolat	0.90625	0.09375	0.12	0.305	20.7518	68.1438
Dox	16	RHL_heterolat	0.0689655	0.0689655	0.14	0.305	17.2488	56.5964
Dox	16	RHL_heterolat	0.171429	0.171429	0.165	0.33	17.4702	53.0493
Dox	16	RHL_heterolat	0.107143	0.107143	0.12	0.275	20.3355	73.9522
Dox	16	RHL_heterolat	0.0740741	0.0740741	0.115	0.275	19.27	70.076
Dox	16	RHL_heterolat	0.15625	0.15625	0.135	0.31	18.0354	58.1735
Dox	16	RHL_heterolat	0.0625	0.0625	0.13	0.325	20.4135	62.7865
Dox	16	RHL_heterolat	0.0454545	0.0454545	0.08	0.23	20.8818	90.6794
Dox	16	RHL_heterolat	0.333333	0.333333	0.11	0.28	19.3467	69.1042
Dox	16	RHL_heterolat	0.214286	0.214286	0.155	0.3	14.4847	48.2174
Dox	17	RHL_heterolat	0.121212	0.121212	0.135	0.315	18.4687	58.6071
Dox	17	RHL_heterolat	0.114286	0.114286	0.14	0.35	17.0839	48.811
Dox	17	RHL_heterolat	0.0645161	0.0645161	0.13	0.32	18.6372	58.2845
Dox	17	RHL_heterolat	1	0	0.12	0.29	20.2243	69.739
Dox	17	RHL_heterolat	1	0	0.125	0.295	19.943	67.5904
Dox	17	RHL_heterolat	0.965517	0.0344828	0.095	0.27	21.4331	79.5026
Dox	17	RHL_heterolat	0.972973	0.027027	0.185	0.365	16.689	45.7466
Dox	18	RHL_heterolat	0.0384615	0.0384615	0.115	0.265	19.9795	75.3561
Dox	18	RHL_heterolat	0.103448	0.103448	0.125	0.28	18.7493	66.9487
Dox	18	RHL_heterolat	0.142857	0.142857	0.075	0.21	21.1882	100.896
Dox	18	RHL_heterolat	0.0869565	0.0869565	0.08	0.235	19.9035	84.6375
Dox	18	RHL_heterolat	1	0	0.15	0.315	18.1292	57.529
Dox	18	RHL_heterolat	0.96875	0.03125	0.15	0.32	18.32	57.25
Dox	18	RHL_heterolat	0.2	0.2	0.065	0.2	22.2706	111.353
Dox	18	RHL_heterolat	0.958333	0.0416667	0.09	0.235	19.9247	84.8555
Dox	18	RHL_heterolat	0.2	0.2	0.105	0.245	19.8426	81.0496
Dox	18	RHL_heterolat	0.125	0.125	0.095	0.25	17.7635	71.037
Dox	1	RHL_heterolat	0.159091	0.159091	0.25	0.435	15.499	35.6413
Dox	1	RHL_heterolat	0.0810811	0.0810811	0.225	0.39	17.5633	45.0375
Dox	1	RHL_heterolat	0.0714286	0.0714286	0.13	0.285	20.1402	70.6718
Dox	1	RHL_heterolat	1	0	0.22	0.405	16.7471	41.3732
Dox	1	RHL_heterolat	0.193548	0.193548	0.135	0.29	19.0263	65.7689
Dox	1	RHL_heterolat	0.0227273	0.0227273	0.25	0.44	14.5663	33.1052
Dox	1	RHL_heterolat	0.0740741	0.0740741	0.125	0.285	19.2658	67.4928
Dox	1	RHL_heterolat	0.137931	0.137931	0.125	0.28	19.667	70.1719
Dox	2	RHL_heterolat	0.966667	0.0333333	0.125	0.285	21.3313	74.9103
Dox	2	RHL_heterolat	0	0	0.3	0.5	13.9161	27.7671
Dox	2	RHL_heterolat	0.1	0.1	0.135	0.29	17.6356	60.7477
Dox	2	RHL_heterolat	0.0810811	0.0810811	0.185	0.36	16.6953	46.3958
Dox	2	RHL_heterolat	0.0322581	0.0322581	0.15	0.32	19.2145	60.0448
Dox	2	RHL_heterolat	0.107143	0.107143	0.13	0.275	16.2833	59.1774
Dox	2	RHL_heterolat	1	0	0.085	0.235	19.5586	83.1914
Dox	2	RHL_heterolat	0.962963	0.037037	0.115	0.255	19.1935	75.2673
Dox	7	RHL_heterolat	0.0789474	0.0789474	0.195	0.37	16.9931	45.8829
Dox	7	RHL_heterolat	0.0689655	0.0689655	0.125	0.29	18.3526	63.285
Dox	7	RHL_heterolat	0.0666667	0.0666667	0.14	0.3	17.5048	58.3495
Dox	7	RHL_heterolat	0.142857	0.142857	0.11	0.265	20.5588	77.6757
Dox	7	RHL_heterolat	0.192308	0.192308	0.11	0.255	17.1162	67.018
Dox	7	RHL_heterolat	0.967742	0.0322581	0.135	0.3	19.3456	64.565
Dox	7	RHL_heterolat	0.153846	0.153846	0.095	0.245	21.2346	86.7203
Dox	7	RHL_heterolat	0.136364	0.136364	0.09	0.225	18.503	82.2346
Dox	7	RHL_heterolat	0.103448	0.103448	0.13	0.29	18.8023	64.8356
Dox	8	RHL_heterolat	0.142857	0.142857	0.12	0.275	19.5252	71.0393
Dox	8	RHL_heterolat	0.115385	0.115385	0.115	0.265	17.6889	66.8253
Dox	8	RHL_heterolat	1	0	0.1	0.245	21.4427	87.5506
Dox	8	RHL_heterolat	0.971429	0.0285714	0.16	0.315	14.7097	46.4417
Dox	8	RHL_heterolat	0.08	0.08	0.11	0.25	17.6048	70.4194
Dox	8	RHL_heterolat	0.0384615	0.0384615	0.115	0.265	20.0684	75.7468
Dox	9	RHL_heterolat	0.125	0.125	0.1	0.23	18.2343	79.362
Dox	9	RHL_heterolat	0.125	0.125	0.115	0.24	14.2111	59.2128
Dox	9	RHL_heterolat	0.315789	0.315789	0.055	0.175	25.3521	145.111
Dox	9	RHL_heterolat	0.925926	0.0740741	0.125	0.255	15.2813	59.9048
Dox	9	RHL_heterolat	0.294118	0.294118	0.07	0.18	20.1891	112.192
Dox	9	RHL_heterolat	0.380952	0.380952	0.075	0.195	18.9266	97.3727
Dox	9	RHL_heterolat	0.184211	0.184211	0.225	0.365	13.2842	36.4599
Dox	9	RHL_heterolat	0.151515	0.151515	0.185	0.34	13.4862	39.6832
Dox	9	RHL_heterolat	0.842105	0.157895	0.08	0.19	17.7394	93.3655
Dox	10	RHL_heterolat	0.142857	0.142857	0.12	0.275	16.7626	60.9553
Dox	10	RHL_heterolat	0.119048	0.119048	0.245	0.415	15.11	36.4125
Dox	10	RHL_heterolat	0.181818	0.181818	0.085	0.225	23.3901	104.077
Dox	10	RHL_heterolat	0.315789	0.315789	0.065	0.18	20.7054	115.233
Dox	10	RHL_heterolat	0.333333	0.333333	0.055	0.175	24.9276	142.532
Dox	10	RHL_heterolat	0.578947	0.421053	0.07	0.215	25.3653	119.239
Dox	10	RHL_heterolat	0.809524	0.190476	0.07	0.18	16.9457	97.7539
Dox	10	RHL_heterolat	0.333333	0.333333	0.07	0.195	23.9273	123.266
Dox	10	RHL_heterolat	0.35	0.35	0.085	0.225	26.5139	118.41
Dox	12	RHL_heterolat	0	0	0.105	0.255	18.1653	71.3735
Dox	12	RHL_heterolat	0.142857	0.142857	0.075	0.205	18.954	92.4438
Dox	12	RHL_heterolat	0.923077	0.0769231	0.13	0.275	16.2031	58.8899
Dox	12	RHL_heterolat	0.0952381	0.0952381	0.085	0.21	17.1562	81.6963
Dox	12	RHL_heterolat	0.7	0.3	0.075	0.19	18.3676	96.6572
Dox	12	RHL_heterolat	0.826087	0.173913	0.095	0.225	16.6764	74.0487
Dox	12	RHL_heterolat	0.666667	0.333333	0.075	0.21	20.1442	96.3364
Dox	13	RHL_heterolat	0.0714286	0.0714286	0.13	0.28	17.7715	63.4698
Dox	13	RHL_heterolat	0.0322581	0.0322581	0.15	0.315	18.4451	58.5552
Dox	13	RHL_heterolat	0.0416667	0.0416667	0.105	0.245	19.6001	79.9821
Dox	13	RHL_heterolat	0.230769	0.230769	0.105	0.235	17.0143	72.5623
Dox	13	RHL_heterolat	0.227273	0.227273	0.09	0.215	18.801	87.562
Dox	13	RHL_heterolat	0.238095	0.238095	0.09	0.215	19.0963	89.0743
Dox	13	RHL_heterolat	0.333333	0.333333	0.095	0.21	17.0999	81.4283
Dox	13	RHL_heterolat	0.318182	0.318182	0.1	0.22	17.0976	77.7166
Dox	13	RHL_heterolat	0.291667	0.291667	0.105	0.235	15.2552	64.9974
Dox	13	RHL_heterolat	0.16	0.16	0.135	0.265	16.2833	61.5476
Dox	14	RHL_heterolat	1	0	0.105	0.245	19.862	81.2548
Dox	14	RHL_heterolat	0.956522	0.0434783	0.095	0.235	21.3777	91.0011
Dox	14	RHL_heterolat	1	0	0.095	0.235	19.8693	84.5509
Dox	14	RHL_heterolat	0.956522	0.0434783	0.1	0.23	17.8732	77.7097
Dox	14	RHL_heterolat	0.761905	0.238095	0.08	0.205	20.3191	99.1931
Dox	14	RHL_heterolat	0.809524	0.190476	0.07	0.2	20.9988	105.027
Dox	14	RHL_heterolat	0.916667	0.0833333	0.1	0.235	18.782	79.8698
Dox	14	RHL_heterolat	0.35	0.35	0.07	0.19	21.8054	114.803
Dox	15	RHL_heterolat	1	0	0.095	0.24	20.3029	84.4829
Dox	15	RHL_heterolat	0.928571	0.0714286	0.1	0.255	21.7912	85.6178
Dox	15	RHL_heterolat	0.2	0.2	0.07	0.205	21.7492	106.09
Dox	15	RHL_heterolat	0.47619	0.47619	0.065	0.18	22.9185	127.269
Dox	15	RHL_heterolat	0.263158	0.263158	0.055	0.18	25.3844	140.942
Dox	15	RHL_heterolat	0.3	0.3	0.055	0.195	27.2841	139.942
Dox	15	RHL_heterolat	0.3	0.3	0.06	0.19	24.9503	131.337
Dox	16	RHL_heterolat	0.28	0.28	0.1	0.255	18.7035	73.31
Dox	16	RHL_heterolat	0.208333	0.208333	0.1	0.255	17.2722	68.3806
Dox	16	RHL_heterolat	0.142857	0.142857	0.115	0.275	19.7835	71.9582
Dox	16	RHL_heterolat	0.12	0.12	0.1	0.255	18.3088	71.8417
Dox	16	RHL_heterolat	0.125	0.125	0.085	0.23	22.1508	96.3588
Dox	16	RHL_heterolat	0.26087	0.26087	0.085	0.215	19.4906	90.6669
Dox	16	RHL_heterolat	0.0357143	0.0357143	0.12	0.285	16.5729	58.153
Dox	16	RHL_heterolat	0.151515	0.151515	0.135	0.31	18.8882	60.9677
Dox	16	RHL_heterolat	1	0	0.095	0.24	19.7565	82.4236
Dox	17	RHL_heterolat	0.965517	0.0344828	0.115	0.28	21.123	75.4782
Dox	17	RHL_heterolat	0.777778	0.222222	0.06	0.18	23.2936	129.409
Dox	17	RHL_heterolat	0	0	0.14	0.315	19.4066	61.7154
Dox	17	RHL_heterolat	1	0	0.135	0.305	17.5658	57.7181
Dox	17	RHL_heterolat	0.833333	0.166667	0.075	0.22	22.1074	100.892
Dox	17	RHL_heterolat	0.103448	0.103448	0.125	0.295	18.9621	64.2595
Dox	17	RHL_heterolat	0.0740741	0.0740741	0.115	0.275	21.1061	76.7817
Dox	17	RHL_heterolat	0.928571	0.0714286	0.12	0.27	20.8339	77.3742
Dox	17	RHL_heterolat	0.115385	0.115385	0.09	0.24	21.3802	89.5809
Dox	17	RHL_heterolat	1	0	0.075	0.215	22.0818	102.725
Dox	18	RHL_heterolat	0.931034	0.0689655	0.13	0.28	20.2807	72.581
Dox	18	RHL_heterolat	1	0	0.12	0.285	19.7856	69.375
Dox	18	RHL_heterolat	0.25	0.25	0.07	0.195	22.4445	115.054
Dox	18	RHL_heterolat	0.333333	0.333333	0.075	0.2	18.0151	90.4761
Dox	18	RHL_heterolat	0.925926	0.0740741	0.12	0.255	19.1495	75.3237
Dox	18	RHL_heterolat	0.736842	0.263158	0.065	0.185	21.4892	116.091
Dox	18	RHL_heterolat	0.6875	0.3125	0.065	0.18	21.0131	116.866
Dox	18	RHL_heterolat	1	0	0.08	0.22	22.8689	103.949
