# Supplementary material for: Long ascending propriospinal neurons provide flexible, context-specific control of interlimb coordination
Source: eLife. 2020 Sep 9;9:e53565. doi: 10.7554/eLife.53565 (PMC7527236; doi:10.7554/eLife.53565)
Supplement: Figure 4—source data 1. [file elife-53565-fig4-data1.xlsx]

## Sheet: Phase
Gait_ID	Limb_ID	rawPhase	transPhase		Gait_ID	Limb_ID	rawPhase	transPhase		Gait_ID	Limb_ID	rawPhase	transPhase		Gait_ID	Limb_ID	rawPhase	transPhase		ref_r-FL_swingTime(s)		ref_r-HL_swingTime(s)		ref_r-FL_stanceTime(s)		ref_r-HL_stanceTime(s)		ref_r-FL_strideTime(s)		ref_r-HL_strideTime(s)		ref_r-FL_strideFreq(Hz)		ref_r-HL_strideFreq(Hz)		ref_r-FL_strideDist(cm)		ref_r-HL_strideDist(cm)		ref_r-FL_instSpd(cm/s)		ref_r-HL_instSpd(cm/s)		avg_FL-HL_instSpd(cm/s)
W-T	L-R_forelimbs	0.5	0.5		W-T	L-R_hindlimbs	0.5	0.5		W-T	RHL_homolat	0.625	0.625		W-T	RHL_heterolat	0.2	0.2		0.13		0.12		0.13		0.12		0.26		0.24		3.84615		4.16667		16.8931		16.9177		64.9736		70.4903		67.732
W-T	L-R_forelimbs	0.5	0.5		W-T	L-R_hindlimbs	0.5	0.5		W-T	RHL_homolat	0.5	0.5		W-T	RHL_heterolat	0.125	0.125		0.12		0.15		0.12		0.17		0.24		0.32		4.16667		3.125		13.8549		19.4785		57.729		60.8704		59.2997
W-T	L-R_forelimbs	0.5	0.5		W-T	L-R_hindlimbs	0.5	0.5		W-T	RHL_homolat	0.6	0.6		W-T	RHL_heterolat	0.0666667	0.0666667		0.16		0.15		0.16		0.15		0.32		0.3		3.125		3.33333		15.7558		16.4046		49.2367		54.6821		51.9594
W-T	L-R_forelimbs	0.5	0.5		W-T	L-R_hindlimbs	0.5	0.5		W-T	RHL_homolat	0.571429	0.571429		W-T	RHL_heterolat	0.0909091	0.0909091		0.15		0.15		0.15		0.13		0.3		0.28		3.33333		3.57143		18.8325		19.1482		62.775		68.3865		65.5808
W-T	L-R_forelimbs	0.5	0.5		W-T	L-R_hindlimbs	0.5	0.5		W-T	RHL_homolat	0.6	0.6		W-T	RHL_heterolat	0.128205	0.128205		0.13		0.15		0.18		0.15		0.31		0.3		3.22581		3.33333		14.3654		16.7053		46.34		55.6844		51.0122
W-T	L-R_forelimbs	0.5	0.5		W-T	L-R_hindlimbs	0.5	0.5		W-T	RHL_homolat	0.545455	0.545455		W-T	RHL_heterolat	0.0454545	0.0454545		0.12		0.13		0.1		0.09		0.22		0.22		4.54545		4.54545		24.3131		23.9115		110.514		108.688		109.601
W-T	L-R_forelimbs	0.5	0.5		W-T	L-R_hindlimbs	0.5	0.5		W-T	RHL_homolat	0.458333	0.541667		W-T	RHL_heterolat	0.958333	0.0416667		0.15		0.14		0.09		0.1		0.24		0.24		4.16667		4.16667		25.4517		25.514		106.049		106.308		106.179
W-T	L-R_forelimbs	0.5	0.5		W-T	L-R_hindlimbs	0.5	0.5		W-T	RHL_homolat	0.45	0.55		W-T	RHL_heterolat	0.025	0.025		0.13		0.12		0.08		0.08		0.21		0.2		4.7619		5		28.1262		29.3229		133.934		146.614		140.274
W-T	L-R_forelimbs	0.5	0.5		W-T	L-R_hindlimbs	0.5	0.5		W-T	RHL_homolat	0.552632	0.552632		W-T	RHL_heterolat	0.0263158	0.0263158		0.105		0.115		0.085		0.075		0.19		0.19		5.26316		5.26316		22.2676		23.6855		117.198		124.66		120.929
W-T	L-R_forelimbs	0.5	0.5		W-T	L-R_hindlimbs	0.5	0.5		W-T	RHL_homolat	0.54	0.54		W-T	RHL_heterolat	0.982456	0.0175439		0.14		0.135		0.14		0.115		0.28		0.25		3.57143		4		17.7553		17.1542		63.4119		68.6169		66.0144
W-T	L-R_forelimbs	0.52	0.52		W-T	L-R_hindlimbs	0.5	0.5		W-T	RHL_homolat	0.565217	0.565217		W-T	RHL_heterolat	0.0434783	0.0434783		0.11		0.12		0.14		0.11		0.25		0.23		4		4.34783		17.33		16.4454		69.32		71.5018		70.4109
W-T	L-R_forelimbs	0.484848	0.515152		W-T	L-R_hindlimbs	0.5	0.5		W-T	RHL_homolat	0.588235	0.588235		W-T	RHL_heterolat	0.117647	0.117647		0.15		0.17		0.18		0.17		0.33		0.34		3.0303		2.94118		17.3911		17.7004		52.7002		52.0601		52.3801
W-T	L-R_forelimbs	0.482759	0.517241		W-T	L-R_hindlimbs	0.5	0.5		W-T	RHL_homolat	0.566667	0.566667		W-T	RHL_heterolat	0.0333333	0.0333333		0.15		0.16		0.14		0.14		0.29		0.3		3.44828		3.33333		18.1682		18.1204		62.649		60.4014		61.5252
W-T	L-R_forelimbs	0.461538	0.538462		W-T	L-R_hindlimbs	0.5	0.5		W-T	RHL_homolat	0.535714	0.535714		W-T	RHL_heterolat	0.0666667	0.0666667		0.12		0.16		0.14		0.12		0.26		0.28		3.84615		3.57143		15.4944		18.971		59.5939		67.7535		63.6737
W-T	L-R_forelimbs	0.45	0.55		W-T	L-R_hindlimbs	0.5	0.5		W-T	RHL_homolat	0.5	0.5		W-T	RHL_heterolat	0.944444	0.0555556		0.11		0.11		0.09		0.09		0.2		0.2		5		5		22.2422		21.5213		111.211		107.607		109.409
W-T	L-R_forelimbs	0.478261	0.521739		W-T	L-R_hindlimbs	0.5	0.5		W-T	RHL_homolat	0.52381	0.52381		W-T	RHL_heterolat	0.125	0.125		0.14		0.15		0.1		0.09		0.24		0.24		4.16667		4.16667		24.1005		23.6568		100.419		98.57		99.4944
W-T	L-R_forelimbs	0.521739	0.521739		W-T	L-R_hindlimbs	0.5	0.5		W-T	RHL_homolat	0.5	0.5		W-T	RHL_heterolat	0.0416667	0.0416667		0.14		0.13		0.09		0.09		0.23		0.22		4.34783		4.54545		23.6387		24.104		102.777		109.564		106.17
W-T	L-R_forelimbs	0.46875	0.53125		W-T	L-R_hindlimbs	0.5	0.5		W-T	RHL_homolat	0.633333	0.633333		W-T	RHL_heterolat	0.0666667	0.0666667		0.13		0.13		0.19		0.17		0.32		0.3		3.125		3.33333		16.3906		14.4719		51.2207		48.2398		49.7302
W-T	L-R_forelimbs	0.451613	0.548387		W-T	L-R_hindlimbs	0.5	0.5		W-T	RHL_homolat	0.566667	0.566667		W-T	RHL_heterolat	0.047619	0.047619		0.14		0.13		0.17		0.17		0.31		0.3		3.22581		3.33333		17.1802		12.7743		55.4199		42.5809		49.0004
W-T	L-R_forelimbs	0.473684	0.526316		W-T	L-R_hindlimbs	0.5	0.5		W-T	RHL_homolat	0.552632	0.552632		W-T	RHL_heterolat	0.0789474	0.0789474		0.115		0.12		0.075		0.07		0.19		0.19		5.26316		5.26316		21.9053		22.5266		115.291		118.561		116.926
W-T	L-R_forelimbs	0.490909	0.509091		W-T	L-R_hindlimbs	0.5	0.5		W-T	RHL_homolat	0.5	0.5		W-T	RHL_heterolat	0.04	0.04		0.13		0.145		0.145		0.105		0.275		0.25		3.63636		4		22.2738		22.8698		80.9956		91.4791		86.2374
W-T	L-R_forelimbs	0.466667	0.533333		W-T	L-R_hindlimbs	0.5	0.5		W-T	RHL_homolat	0.5	0.5		W-T	RHL_heterolat	0.0555556	0.0555556		0.125		0.145		0.1		0.095		0.225		0.24		4.44444		4.16667		21.5803		22.1457		95.9123		92.2737		94.093
W-T	L-R_forelimbs	0.461538	0.538462		W-T	L-R_hindlimbs	0.5	0.5		W-T	RHL_homolat	0.526316	0.526316		W-T	RHL_heterolat	0.052632	0.052632		0.115		0.125		0.08		0.065		0.195		0.19		5.12821		5.26316		24.5834		25.1108		126.069		132.162		129.115
W-T	L-R_forelimbs	0.510638	0.510638		W-T	L-R_hindlimbs	0.5	0.5		W-T	RHL_homolat	0.44	0.56		W-T	RHL_heterolat	0.98	0.02		0.14		0.15		0.095		0.1		0.235		0.25		4.25532		4		19.8672		20.8336		84.5411		83.3343		83.9377
W-T	L-R_forelimbs	0.54386	0.54386		W-T	L-R_hindlimbs	0.5	0.5		W-T	RHL_homolat	0.592593	0.592593		W-T	RHL_heterolat	1	0		0.125		0.175		0.16		0.095		0.285		0.27		3.50877		3.7037		24.5879		16.97		86.2734		62.8519		74.5626
W-T	L-R_forelimbs	0.477273	0.522727		W-T	L-R_hindlimbs	0.5	0.5		W-T	RHL_homolat	0.5	0.5		W-T	RHL_heterolat	1	0		0.13		0.145		0.1		0.075		0.23		0.22		4.34783		4.54545		31.6883		21.0139		137.775		95.5179		116.646
W-T	L-R_forelimbs	0.536585	0.536585		W-T	L-R_hindlimbs	0.5	0.5		W-T	RHL_homolat	0.5	0.5		W-T	RHL_heterolat	0.977273	0.0227273		0.105		0.155		0.095		0.06		0.2		0.215		5		4.65116		20.1208		26.6114		100.604		123.774		112.189
W-T	L-R_forelimbs	0.5	0.5		W-T	L-R_hindlimbs	0.461538	0.538462		W-T	RHL_homolat	0.615385	0.615385		W-T	RHL_heterolat	0.0434783	0.0434783		0.11		0.12		0.14		0.14		0.25		0.26		4		3.84615		15.3959		16.557		61.5834		63.6809		62.6322
W-T	L-R_forelimbs	0.5	0.5		W-T	L-R_hindlimbs	0.541667	0.541667		W-T	RHL_homolat	0.666667	0.666667		W-T	RHL_heterolat	0.0952381	0.0952381		0.11		0.13		0.17		0.11		0.28		0.24		3.57143		4.16667		13.7484		12.0531		49.1015		50.2212		49.6614
W-T	L-R_forelimbs	0.5	0.5		W-T	L-R_hindlimbs	0.533333	0.533333		W-T	RHL_homolat	0.533333	0.533333		W-T	RHL_heterolat	0.0666667	0.0666667		0.13		0.15		0.15		0.15		0.28		0.3		3.57143		3.33333		16.7906		17.5978		59.9664		58.6595		59.3129
W-T	L-R_forelimbs	0.5	0.5		W-T	L-R_hindlimbs	0.52	0.52		W-T	RHL_homolat	0.64	0.64		W-T	RHL_heterolat	0.12	0.12		0.11		0.13		0.15		0.12		0.26		0.25		3.84615		4		14.504		16.1064		55.7846		64.4257		60.1052
W-T	L-R_forelimbs	0.5	0.5		W-T	L-R_hindlimbs	0.481481	0.518519		W-T	RHL_homolat	0.555556	0.555556		W-T	RHL_heterolat	0.037037	0.037037		0.14		0.13		0.1		0.16		0.24		0.29		4.16667		3.44828		18.008		15.4849		75.0334		53.3962		64.2148
W-T	L-R_forelimbs	0.5	0.5		W-T	L-R_hindlimbs	0.529412	0.529412		W-T	RHL_homolat	0.764706	0.764706		W-T	RHL_heterolat	0.346154	0.346154		0.19		0.13		0.24		0.21		0.43		0.34		2.32558		2.94118		15.8242		12.9357		36.8006		38.0461		37.4233
W-T	L-R_forelimbs	0.5	0.5		W-T	L-R_hindlimbs	0.541667	0.541667		W-T	RHL_homolat	0.608696	0.608696		W-T	RHL_heterolat	0.0181818	0.0181818		0.13		0.13		0.14		0.11		0.27		0.24		3.7037		4.16667		15.8224		19.8879		58.6016		82.8662		70.7339
W-T	L-R_forelimbs	0.5	0.5		W-T	L-R_hindlimbs	0.483871	0.516129		W-T	RHL_homolat	0.548387	0.548387		W-T	RHL_heterolat	0.969697	0.030303		0.15		0.15		0.19		0.16		0.34		0.31		2.94118		3.22581		16.4439		16.7599		48.3644		54.0641		51.2142
W-T	L-R_forelimbs	0.5	0.5		W-T	L-R_hindlimbs	0.481481	0.518519		W-T	RHL_homolat	0.555556	0.555556		W-T	RHL_heterolat	0.0740741	0.0740741		0.13		0.15		0.09		0.12		0.22		0.27		4.54545		3.7037		20.3387		19.7133		92.4485		73.0122		82.7304
W-T	L-R_forelimbs	0.5	0.5		W-T	L-R_hindlimbs	0.55	0.55		W-T	RHL_homolat	0.55	0.55		W-T	RHL_heterolat	0.05	0.05		0.11		0.11		0.09		0.09		0.2		0.2		5		5		22.8676		21.1032		114.338		105.516		109.927
W-T	L-R_forelimbs	0.5	0.5		W-T	L-R_hindlimbs	0.478261	0.521739		W-T	RHL_homolat	0.565217	0.565217		W-T	RHL_heterolat	0.0434783	0.0434783		0.13		0.11		0.11		0.12		0.24		0.23		4.16667		4.34783		21.0915		17.7022		87.8813		76.9662		82.4238
W-T	L-R_forelimbs	0.5	0.5		W-T	L-R_hindlimbs	0.541667	0.541667		W-T	RHL_homolat	0.541667	0.541667		W-T	RHL_heterolat	0.0833333	0.0833333		0.11		0.13		0.11		0.11		0.22		0.24		4.54545		4.16667		19.3495		21.2099		87.9522		88.3746		88.1634
W-T	L-R_forelimbs	0.5	0.5		W-T	L-R_hindlimbs	0.52381	0.52381		W-T	RHL_homolat	0.52381	0.52381		W-T	RHL_heterolat	0.0952381	0.0952381		0.13		0.14		0.09		0.07		0.22		0.21		4.54545		4.7619		25.244		25.4956		114.745		121.408		118.076
W-T	L-R_forelimbs	0.5	0.5		W-T	L-R_hindlimbs	0.473684	0.526316		W-T	RHL_homolat	0.526316	0.526316		W-T	RHL_heterolat	0.0526316	0.0526316		0.12		0.12		0.08		0.07		0.2		0.19		5		5.26316		24.4373		23.6517		122.186		124.483		123.335
W-T	L-R_forelimbs	0.5	0.5		W-T	L-R_hindlimbs	0.538462	0.538462		W-T	RHL_homolat	0.451613	0.548387		W-T	RHL_heterolat	0.903226	0.0967742		0.15		0.17		0.11		0.14		0.26		0.31		3.84615		3.22581		17.6873		20.9237		68.0279		67.4958		67.7619
W-T	L-R_forelimbs	0.5	0.5		W-T	L-R_hindlimbs	0.489796	0.510204		W-T	RHL_homolat	0.469388	0.530612		W-T	RHL_heterolat	0.0612245	0.0612245		0.13		0.14		0.1		0.105		0.23		0.245		4.34783		4.08163		20.749		22.72		90.2132		92.7347		91.474
W-T	L-R_forelimbs	0.5	0.5		W-T	L-R_hindlimbs	0.463415	0.536585		W-T	RHL_homolat	0.439024	0.560976		W-T	RHL_heterolat	0.0416667	0.0416667		0.115		0.13		0.085		0.075		0.2		0.205		5		4.87805		18.9669		17.97		94.8343		87.6587		91.2465
W-T	L-R_forelimbs	0.5	0.5		W-T	L-R_hindlimbs	0.55	0.55		W-T	RHL_homolat	0.525	0.525		W-T	RHL_heterolat	1	0		0.12		0.13		0.07		0.07		0.19		0.2		5.26316		5		21.498		23.0344		113.148		115.172		114.16
W-T	L-R_forelimbs	0.5	0.5		W-T	L-R_hindlimbs	0.473684	0.526316		W-T	RHL_homolat	0.526316	0.526316		W-T	RHL_heterolat	1	0		0.115		0.12		0.075		0.07		0.19		0.19		5.26316		5.26316		33.127		32.9288		174.353		173.309		173.831
W-T	L-R_forelimbs	0.5	0.5		W-T	L-R_hindlimbs	0.538462	0.538462		W-T	RHL_homolat	0.615385	0.615385		W-T	RHL_heterolat	0.0769231	0.0769231		0.155		0.14		0.125		0.12		0.28		0.26		3.57143		3.84615		19.6636		18.4319		70.227		70.892		70.5595
W-T	L-R_forelimbs	0.5	0.5		W-T	L-R_hindlimbs	0.529412	0.529412		W-T	RHL_homolat	0.509804	0.509804		W-T	RHL_heterolat	0.0175439	0.0175439		0.145		0.16		0.115		0.095		0.26		0.255		3.84615		3.92157		31.0231		32.1869		119.32		126.223		122.771
W-T	L-R_forelimbs	0.5	0.5		W-T	L-R_hindlimbs	0.477273	0.522727		W-T	RHL_homolat	0.454545	0.545455		W-T	RHL_heterolat	1	0		0.105		0.14		0.095		0.08		0.2		0.22		5		4.54545		19.2138		24.1379		96.0691		109.718		102.894
W-T	L-R_forelimbs	0.5	0.5		W-T	L-R_hindlimbs	0.510638	0.510638		W-T	RHL_homolat	0.617021	0.617021		W-T	RHL_heterolat	0.0425532	0.0425532		0.125		0.13		0.145		0.105		0.27		0.235		3.7037		4.25532		18.3027		16.4874		67.7876		70.159		68.9733
W-T	L-R_forelimbs	0.5	0.5		W-T	L-R_hindlimbs	0.521739	0.521739		W-T	RHL_homolat	0.521739	0.521739		W-T	RHL_heterolat	0.0434783	0.0434783		0.12		0.15		0.1		0.08		0.22		0.23		4.54545		4.34783		22.999		21.5731		104.541		93.7959		99.1685
W-T	L-R_forelimbs	0.5	0.5		W-T	L-R_hindlimbs	0.489362	0.510638		W-T	RHL_homolat	0.510638	0.510638		W-T	RHL_heterolat	1	0		0.125		0.13		0.105		0.105		0.23		0.235		4.34783		4.25532		20.8522		17.4399		90.6615		74.2124		82.437
W-T	L-R_forelimbs	0.5	0.5		W-T	L-R_hindlimbs	0.511111	0.511111		W-T	RHL_homolat	0.488889	0.511111		W-T	RHL_heterolat	0.977778	0.0222222		0.12		0.14		0.1		0.08		0.22		0.22		4.54545		4.54545		20.6938		21.7951		94.0629		99.0688		96.5659
W-T	L-R_forelimbs	0.5	0.5		W-T	L-R_hindlimbs	0.526316	0.526316		W-T	RHL_homolat	0.526316	0.526316		W-T	RHL_heterolat	0.0697674	0.0697674		0.125		0.145		0.08		0.075		0.205		0.22		4.87805		4.54545		26.3749		22.0674		128.658		100.306		114.482
W-T	L-R_forelimbs	0.53125	0.53125		W-T	L-R_hindlimbs	0.482759	0.517241		W-T	RHL_homolat	0.413793	0.586207		W-T	RHL_heterolat	1	0		0.15		0.14		0.1		0.15		0.25		0.29		4		3.44828		17.9761		15.3674		71.9043		52.9911		62.4477
W-T	L-R_forelimbs	0.52381	0.52381		W-T	L-R_hindlimbs	0.545455	0.545455		W-T	RHL_homolat	0.545455	0.545455		W-T	RHL_heterolat	0.0357143	0.0357143		0.12		0.12		0.09		0.1		0.21		0.22		4.7619		4.54545		19.7229		19.988		93.9185		90.8543		92.3864
W-T	L-R_forelimbs	0.47619	0.52381		W-T	L-R_hindlimbs	0.458333	0.541667		W-T	RHL_homolat	0.583333	0.583333		W-T	RHL_heterolat	0.0740741	0.0740741		0.09		0.12		0.12		0.12		0.21		0.24		4.7619		4.16667		12.9872		17.254		61.844		71.8915		66.8678
W-T	L-R_forelimbs	0.517241	0.517241		W-T	L-R_hindlimbs	0.533333	0.533333		W-T	RHL_homolat	0.533333	0.533333		W-T	RHL_heterolat	0.0666667	0.0666667		0.15		0.14		0.14		0.16		0.29		0.3		3.44828		3.33333		17.0032		17.4035		58.6317		58.0116		58.3217
W-T	L-R_forelimbs	0.483871	0.516129		W-T	L-R_hindlimbs	0.464286	0.535714		W-T	RHL_homolat	0.642857	0.642857		W-T	RHL_heterolat	0.0714286	0.0714286		0.13		0.12		0.18		0.16		0.31		0.28		3.22581		3.57143		16.5439		14.5831		53.3675		52.0825		52.725
W-T	L-R_forelimbs	0.483871	0.516129		W-T	L-R_hindlimbs	0.46875	0.53125		W-T	RHL_homolat	0.59375	0.59375		W-T	RHL_heterolat	0.09375	0.09375		0.12		0.13		0.19		0.19		0.31		0.32		3.22581		3.125		12.2954		13.8279		39.6624		43.2123		41.4374
W-T	L-R_forelimbs	0.533333	0.533333		W-T	L-R_hindlimbs	0.535714	0.535714		W-T	RHL_homolat	0.535714	0.535714		W-T	RHL_heterolat	0.0357143	0.0357143		0.15		0.16		0.15		0.12		0.3		0.28		3.33333		3.57143		18.4328		16.157		61.4428		57.7035		59.5732
W-T	L-R_forelimbs	0.517241	0.517241		W-T	L-R_hindlimbs	0.464286	0.535714		W-T	RHL_homolat	0.5	0.5		W-T	RHL_heterolat	1	0		0.16		0.14		0.13		0.14		0.29		0.28		3.44828		3.57143		19.2265		18.694		66.2983		66.7644		66.5313
W-T	L-R_forelimbs	0.48	0.52		W-T	L-R_hindlimbs	0.458333	0.541667		W-T	RHL_homolat	0.5	0.5		W-T	RHL_heterolat	0.956522	0.0434783		0.13		0.13		0.12		0.1		0.25		0.23		4		4.34783		19.8132		19.557		79.2528		85.0302		82.1415
W-T	L-R_forelimbs	0.518519	0.518519		W-T	L-R_hindlimbs	0.548387	0.548387		W-T	RHL_homolat	0.516129	0.516129		W-T	RHL_heterolat	0.0967742	0.0967742		0.12		0.15		0.15		0.16		0.27		0.31		3.7037		3.22581		17.4746		16.5984		64.7207		53.5432		59.1319
W-T	L-R_forelimbs	0.521739	0.521739		W-T	L-R_hindlimbs	0.47619	0.52381		W-T	RHL_homolat	0.652174	0.652174		W-T	RHL_heterolat	0.173913	0.173913		0.1		0.1		0.13		0.13		0.23		0.23		4.34783		4.34783		15.8643		14.06		68.9753		61.1303		65.0528
W-T	L-R_forelimbs	0.482759	0.517241		W-T	L-R_hindlimbs	0.482759	0.517241		W-T	RHL_homolat	0.551724	0.551724		W-T	RHL_heterolat	0.0344828	0.0344828		0.15		0.15		0.14		0.14		0.29		0.29		3.44828		3.44828		19.2498		19.3768		66.3786		66.8165		66.5975
W-T	L-R_forelimbs	0.464286	0.535714		W-T	L-R_hindlimbs	0.451613	0.548387		W-T	RHL_homolat	0.612903	0.612903		W-T	RHL_heterolat	0.129032	0.129032		0.14		0.16		0.14		0.15		0.28		0.31		3.57143		3.22581		17.0186		17.4024		60.7807		56.1367		58.4587
W-T	L-R_forelimbs	0.542857	0.542857		W-T	L-R_hindlimbs	0.484848	0.515152		W-T	RHL_homolat	0.575758	0.575758		W-T	RHL_heterolat	0.119048	0.119048		0.17		0.13		0.18		0.2		0.35		0.33		2.85714		3.0303		15.5853		15.5678		44.5295		47.1751		45.8523
W-T	L-R_forelimbs	0.484848	0.515152		W-T	L-R_hindlimbs	0.533333	0.533333		W-T	RHL_homolat	0.533333	0.533333		W-T	RHL_heterolat	0.0606061	0.0606061		0.16		0.15		0.17		0.15		0.33		0.3		3.0303		3.33333		19.6766		19.4667		59.6261		64.889		62.2575
W-T	L-R_forelimbs	0.53125	0.53125		W-T	L-R_hindlimbs	0.454545	0.545455		W-T	RHL_homolat	0.545455	0.545455		W-T	RHL_heterolat	0.0666667	0.0666667		0.17		0.15		0.15		0.18		0.32		0.33		3.125		3.0303		18.1957		18.2054		56.8616		55.1678		56.0147
W-T	L-R_forelimbs	0.465116	0.534884		W-T	L-R_hindlimbs	0.487179	0.512821		W-T	RHL_homolat	0.564103	0.564103		W-T	RHL_heterolat	0.0882353	0.0882353		0.16		0.19		0.18		0.2		0.34		0.39		2.94118		2.5641		17.3848		16.1948		51.1317		41.5252		46.3284
W-T	L-R_forelimbs	0.483871	0.516129		W-T	L-R_hindlimbs	0.514286	0.514286		W-T	RHL_homolat	0.542857	0.542857		W-T	RHL_heterolat	0.0285714	0.0285714		0.16		0.19		0.15		0.16		0.31		0.35		3.22581		2.85714		16.8966		17.3972		54.5053		49.7063		52.1058
W-T	L-R_forelimbs	0.53125	0.53125		W-T	L-R_hindlimbs	0.483871	0.516129		W-T	RHL_homolat	0.483871	0.516129		W-T	RHL_heterolat	0.961538	0.0384615		0.17		0.16		0.15		0.15		0.32		0.31		3.125		3.22581		18.6771		18.6857		58.3658		60.2763		59.3211
W-T	L-R_forelimbs	0.457143	0.542857		W-T	L-R_hindlimbs	0.454545	0.545455		W-T	RHL_homolat	0.424242	0.575758		W-T	RHL_heterolat	0.030303	0.030303		0.18		0.18		0.17		0.15		0.35		0.33		2.85714		3.0303		18.5692		19.6286		53.0548		59.4806		56.2677
W-T	L-R_forelimbs	0.535714	0.535714		W-T	L-R_hindlimbs	0.466667	0.533333		W-T	RHL_homolat	0.5	0.5		W-T	RHL_heterolat	0.966667	0.0333333		0.15		0.17		0.13		0.13		0.28		0.3		3.57143		3.33333		18.9222		18.5891		67.5792		61.9635		64.7713
W-T	L-R_forelimbs	0.518519	0.518519		W-T	L-R_hindlimbs	0.518519	0.518519		W-T	RHL_homolat	0.555556	0.555556		W-T	RHL_heterolat	0.0666667	0.0666667		0.15		0.15		0.12		0.12		0.27		0.27		3.7037		3.7037		18.1165		18.5476		67.0981		68.6948		67.8965
W-T	L-R_forelimbs	0.481481	0.518519		W-T	L-R_hindlimbs	0.464286	0.535714		W-T	RHL_homolat	0.571429	0.571429		W-T	RHL_heterolat	0.0740741	0.0740741		0.12		0.16		0.15		0.12		0.27		0.28		3.7037		3.57143		13.9338		16.7654		51.6068		59.8764		55.7416
W-T	L-R_forelimbs	0.514286	0.514286		W-T	L-R_hindlimbs	0.53125	0.53125		W-T	RHL_homolat	0.53125	0.53125		W-T	RHL_heterolat	0.172414	0.172414		0.16		0.15		0.19		0.17		0.35		0.32		2.85714		3.125		13.3221		14.6092		38.0632		45.6536		41.8584
W-T	L-R_forelimbs	0.515152	0.515152		W-T	L-R_hindlimbs	0.46875	0.53125		W-T	RHL_homolat	0.53125	0.53125		W-T	RHL_heterolat	0.870968	0.129032		0.16		0.15		0.17		0.17		0.33		0.32		3.0303		3.125		17.5682		16.2317		53.237		50.7239		51.9805
W-T	L-R_forelimbs	0.53125	0.53125		W-T	L-R_hindlimbs	0.463415	0.536585		W-T	RHL_homolat	0.487805	0.512195		W-T	RHL_heterolat	0.0731707	0.0731707		0.18		0.2		0.14		0.21		0.32		0.41		3.125		2.43902		16.5168		17.9491		51.615		43.7783		47.6966
W-T	L-R_forelimbs	0.470588	0.529412		W-T	L-R_hindlimbs	0.454545	0.545455		W-T	RHL_homolat	0.484848	0.515152		W-T	RHL_heterolat	0.967742	0.0322581		0.18		0.17		0.16		0.16		0.34		0.33		2.94118		3.0303		18.1685		18.4163		53.4367		55.807		54.6219
W-T	L-R_forelimbs	0.46875	0.53125		W-T	L-R_hindlimbs	0.451613	0.548387		W-T	RHL_homolat	0.483871	0.516129		W-T	RHL_heterolat	0.933333	0.0666667		0.17		0.17		0.15		0.14		0.32		0.31		3.125		3.22581		19.0885		19.7428		59.6517		63.6865		61.6691
W-T	L-R_forelimbs	0.46875	0.53125		W-T	L-R_hindlimbs	0.451613	0.548387		W-T	RHL_homolat	0.516129	0.516129		W-T	RHL_heterolat	0.972222	0.0277778		0.16		0.16		0.16		0.15		0.32		0.31		3.125		3.22581		17.9506		17.9596		56.0957		57.9341		57.0149
W-T	L-R_forelimbs	0.475	0.525		W-T	L-R_hindlimbs	0.536585	0.536585		W-T	RHL_homolat	0.560976	0.560976		W-T	RHL_heterolat	0.0243902	0.0243902		0.19		0.2		0.21		0.21		0.4		0.41		2.5		2.43902		15.0591		14.3109		37.6478		34.9047		36.2763
W-T	L-R_forelimbs	0.535714	0.535714		W-T	L-R_hindlimbs	0.451613	0.548387		W-T	RHL_homolat	0.580645	0.580645		W-T	RHL_heterolat	0.0645161	0.0645161		0.15		0.15		0.13		0.16		0.28		0.31		3.57143		3.22581		16.4737		16.9124		58.8345		54.556		56.6953
W-T	L-R_forelimbs	0.45	0.55		W-T	L-R_hindlimbs	0.454545	0.545455		W-T	RHL_homolat	0.590909	0.590909		W-T	RHL_heterolat	0.0909091	0.0909091		0.1		0.13		0.1		0.09		0.2		0.22		5		4.54545		20.8732		20.6109		104.366		93.6858		99.026
W-T	L-R_forelimbs	0.478261	0.521739		W-T	L-R_hindlimbs	0.55	0.55		W-T	RHL_homolat	0.65	0.65		W-T	RHL_heterolat	0.05	0.05		0.13		0.11		0.1		0.09		0.23		0.2		4.34783		5		19.3253		19.5055		84.0229		97.5276		90.7752
W-T	L-R_forelimbs	0.535714	0.535714		W-T	L-R_hindlimbs	0.48	0.52		W-T	RHL_homolat	0.56	0.56		W-T	RHL_heterolat	0.04	0.04		0.15		0.14		0.13		0.11		0.28		0.25		3.57143		4		17.4149		20.9054		62.1961		83.6216		72.9089
W-T	L-R_forelimbs	0.45	0.55		W-T	L-R_hindlimbs	0.473684	0.526316		W-T	RHL_homolat	0.526316	0.526316		W-T	RHL_heterolat	0.944444	0.0555556		0.11		0.11		0.09		0.08		0.2		0.19		5		5.26316		23.6437		22.8731		118.218		120.385		119.302
W-T	L-R_forelimbs	0.458333	0.541667		W-T	L-R_hindlimbs	0.545455	0.545455		W-T	RHL_homolat	0.590909	0.590909		W-T	RHL_heterolat	1	0		0.12		0.11		0.12		0.11		0.24		0.22		4.16667		4.54545		23.1641		18.4937		96.5169		84.0622		90.2896
W-T	L-R_forelimbs	0.55	0.55		W-T	L-R_hindlimbs	0.55	0.55		W-T	RHL_homolat	0.6	0.6		W-T	RHL_heterolat	0.166667	0.166667		0.11		0.12		0.09		0.08		0.2		0.2		5		5		23.6201		21.7256		118.101		108.628		113.364
W-T	L-R_forelimbs	0.526316	0.526316		W-T	L-R_hindlimbs	0.473684	0.526316		W-T	RHL_homolat	0.578947	0.578947		W-T	RHL_heterolat	0.0833333	0.0833333		0.11		0.11		0.08		0.08		0.19		0.19		5.26316		5.26316		21.1759		20.5123		111.452		107.959		109.706
W-T	L-R_forelimbs	0.478261	0.521739		W-T	L-R_hindlimbs	0.521739	0.521739		W-T	RHL_homolat	0.565217	0.565217		W-T	RHL_heterolat	0.0434783	0.0434783		0.14		0.14		0.09		0.09		0.23		0.23		4.34783		4.34783		23.0611		22.0398		100.266		95.825		98.0454
W-T	L-R_forelimbs	0.47619	0.52381		W-T	L-R_hindlimbs	0.478261	0.521739		W-T	RHL_homolat	0.652174	0.652174		W-T	RHL_heterolat	0.0869565	0.0869565		0.1		0.13		0.11		0.1		0.21		0.23		4.7619		4.34783		15.7991		15.6825		75.2339		68.1846		71.7093
W-T	L-R_forelimbs	0.464286	0.535714		W-T	L-R_hindlimbs	0.52	0.52		W-T	RHL_homolat	0.48	0.52		W-T	RHL_heterolat	1	0		0.15		0.15		0.13		0.1		0.28		0.25		3.57143		4		23.4044		26.2439		83.5871		104.976		94.2814
W-T	L-R_forelimbs	0.55	0.55		W-T	L-R_hindlimbs	0.52381	0.52381		W-T	RHL_homolat	0.571429	0.571429		W-T	RHL_heterolat	0.1	0.1		0.12		0.13		0.08		0.08		0.2		0.21		5		4.7619		27.2853		27.6385		136.426		131.612		134.019
W-T	L-R_forelimbs	0.526316	0.526316		W-T	L-R_hindlimbs	0.578947	0.578947		W-T	RHL_homolat	0.578947	0.578947		W-T	RHL_heterolat	0.0526316	0.0526316		0.11		0.12		0.08		0.07		0.19		0.19		5.26316		5.26316		23.1693		23.5952		121.944		124.185		123.064
W-T	L-R_forelimbs	0.526316	0.526316		W-T	L-R_hindlimbs	0.45	0.55		W-T	RHL_homolat	0.55	0.55		W-T	RHL_heterolat	0.05	0.05		0.12		0.13		0.07		0.07		0.19		0.2		5.26316		5		24.3347		24.4		128.078		122		125.039
W-T	L-R_forelimbs	0.52381	0.52381		W-T	L-R_hindlimbs	0.45	0.55		W-T	RHL_homolat	0.5	0.5		W-T	RHL_heterolat	0.956522	0.0434783		0.13		0.13		0.08		0.07		0.21		0.2		4.7619		5		21.5461		21.9049		102.6		109.524		106.062
W-T	L-R_forelimbs	0.47619	0.52381		W-T	L-R_hindlimbs	0.478261	0.521739		W-T	RHL_homolat	0.521739	0.521739		W-T	RHL_heterolat	0.0869565	0.0869565		0.13		0.15		0.08		0.08		0.21		0.23		4.7619		4.34783		27.9667		28.9646		133.175		125.933		129.554
W-T	L-R_forelimbs	0.52381	0.52381		W-T	L-R_hindlimbs	0.55	0.55		W-T	RHL_homolat	0.55	0.55		W-T	RHL_heterolat	0.05	0.05		0.13		0.13		0.08		0.07		0.21		0.2		4.7619		5		28.4737		27.0921		135.589		135.46		135.525
W-T	L-R_forelimbs	0.47619	0.52381		W-T	L-R_hindlimbs	0.47619	0.52381		W-T	RHL_homolat	0.47619	0.52381		W-T	RHL_heterolat	0	0		0.11		0.11		0.1		0.1		0.21		0.21		4.7619		4.7619		22.039		18.4773		104.948		87.9871		96.4674
W-T	L-R_forelimbs	0.470588	0.529412		W-T	L-R_hindlimbs	0.469388	0.530612		W-T	RHL_homolat	0.469388	0.530612		W-T	RHL_heterolat	0.0408163	0.0408163		0.15		0.135		0.105		0.11		0.255		0.245		3.92157		4.08163		19.1548		19.7092		75.1169		80.4456		77.7812
W-T	L-R_forelimbs	0.469388	0.530612		W-T	L-R_hindlimbs	0.458333	0.541667		W-T	RHL_homolat	0.458333	0.541667		W-T	RHL_heterolat	0	0		0.15		0.135		0.095		0.105		0.245		0.24		4.08163		4.16667		19.2083		20.8501		78.4012		86.8753		82.6382
W-T	L-R_forelimbs	0.477273	0.522727		W-T	L-R_hindlimbs	0.488372	0.511628		W-T	RHL_homolat	0.488372	0.511628		W-T	RHL_heterolat	0.0487805	0.0487805		0.125		0.13		0.095		0.085		0.22		0.215		4.54545		4.65116		21.2623		21.4677		96.6469		99.8497		98.2483
W-T	L-R_forelimbs	0.488372	0.511628		W-T	L-R_hindlimbs	0.487805	0.512195		W-T	RHL_homolat	0.487805	0.512195		W-T	RHL_heterolat	0.0232558	0.0232558		0.13		0.12		0.085		0.085		0.215		0.205		4.65116		4.87805		20.6832		20.9444		96.2011		102.168		99.1845
W-T	L-R_forelimbs	0.468085	0.531915		W-T	L-R_hindlimbs	0.466667	0.533333		W-T	RHL_homolat	0.488889	0.511111		W-T	RHL_heterolat	0	0		0.12		0.12		0.115		0.105		0.235		0.225		4.25532		4.44444		22.9644		24.9348		97.7206		110.821		104.271
W-T	L-R_forelimbs	0.487805	0.512195		W-T	L-R_hindlimbs	0.454545	0.545455		W-T	RHL_homolat	0.454545	0.545455		W-T	RHL_heterolat	0.0909091	0.0909091		0.125		0.115		0.08		0.105		0.205		0.22		4.87805		4.54545		23.3826		26.5036		114.062		120.471		117.266
W-T	L-R_forelimbs	0.466667	0.533333		W-T	L-R_hindlimbs	0.458333	0.541667		W-T	RHL_homolat	0.479167	0.520833		W-T	RHL_heterolat	0.0232558	0.0232558		0.125		0.1		0.1		0.14		0.225		0.24		4.44444		4.16667		19.7959		20.0625		87.982		83.5938		85.7879
W-T	L-R_forelimbs	0.466667	0.533333		W-T	L-R_hindlimbs	0.490196	0.509804		W-T	RHL_homolat	0.45098	0.54902		W-T	RHL_heterolat	0.0784314	0.0784314		0.09		0.05		0.095		0.12		0.185		0.17		5.40541		5.88235		21.8048		14.3781		117.864		84.5772		101.221
W-T	L-R_forelimbs	0.512821	0.512821		W-T	L-R_hindlimbs	0.514286	0.514286		W-T	RHL_homolat	0.485714	0.514286		W-T	RHL_heterolat	0.878788	0.121212		0.105		0.105		0.09		0.07		0.195		0.175		5.12821		5.71429		24.0188		23.9512		123.173		136.864		130.019
W-T	L-R_forelimbs	0.472727	0.527273		W-T	L-R_hindlimbs	0.479167	0.520833		W-T	RHL_homolat	0.520833	0.520833		W-T	RHL_heterolat	0.0208333	0.0208333		0.12		0.125		0.155		0.115		0.275		0.24		3.63636		4.16667		19.2492		20.2739		69.9971		84.4745		77.2358
W-T	L-R_forelimbs	0.545455	0.545455		W-T	L-R_hindlimbs	0.465116	0.534884		W-T	RHL_homolat	0.488372	0.511628		W-T	RHL_heterolat	0.0465116	0.0465116		0.125		0.12		0.095		0.095		0.22		0.215		4.54545		4.65116		21.0233		21.5482		95.5607		100.224		97.8925
W-T	L-R_forelimbs	0.477273	0.522727		W-T	L-R_hindlimbs	0.465116	0.534884		W-T	RHL_homolat	0.604651	0.604651		W-T	RHL_heterolat	0.0697674	0.0697674		0.105		0.12		0.115		0.095		0.22		0.215		4.54545		4.65116		21.5458		21.912		97.9354		101.916		99.9258
W-T	L-R_forelimbs	0.477273	0.522727		W-T	L-R_hindlimbs	0.454545	0.545455		W-T	RHL_homolat	0.590909	0.590909		W-T	RHL_heterolat	0.0454545	0.0454545		0.105		0.115		0.115		0.105		0.22		0.22		4.54545		4.54545		18.7756		18.4424		85.3436		83.8291		84.5863
W-T	L-R_forelimbs	0.466667	0.533333		W-T	L-R_hindlimbs	0.466667	0.533333		W-T	RHL_homolat	0.577778	0.577778		W-T	RHL_heterolat	0.0888889	0.0888889		0.11		0.125		0.115		0.1		0.225		0.225		4.44444		4.44444		19.3599		19.7884		86.044		87.9482		86.9961
W-T	L-R_forelimbs	0.512195	0.512195		W-T	L-R_hindlimbs	0.472222	0.527778		W-T	RHL_homolat	0.472222	0.527778		W-T	RHL_heterolat	0.0833333	0.0833333		0.115		0.11		0.09		0.07		0.205		0.18		4.87805		5.55556		26.8552		28.633		131.001		159.072		145.037
W-T	L-R_forelimbs	0.515152	0.515152		W-T	L-R_hindlimbs	0.516129	0.516129		W-T	RHL_homolat	0.612903	0.612903		W-T	RHL_heterolat	0.0322581	0.0322581		0.09		0.09		0.075		0.065		0.165		0.155		6.06061		6.45161		21.8287		19.2988		132.295		124.508		128.402
W-T	L-R_forelimbs	0.510638	0.510638		W-T	L-R_hindlimbs	0.533333	0.533333		W-T	RHL_homolat	0.511111	0.511111		W-T	RHL_heterolat	1	0		0.12		0.13		0.115		0.095		0.235		0.225		4.25532		4.44444		20.2009		21.2835		85.9614		94.5932		90.2773
W-T	L-R_forelimbs	0.477273	0.522727		W-T	L-R_hindlimbs	0.47619	0.52381		W-T	RHL_homolat	0.5	0.5		W-T	RHL_heterolat	0.97561	0.0243902		0.125		0.13		0.095		0.08		0.22		0.21		4.54545		4.7619		23.6389		24.7585		107.45		117.898		112.674
W-T	L-R_forelimbs	0.47619	0.52381		W-T	L-R_hindlimbs	0.487805	0.512195		W-T	RHL_homolat	0.487805	0.512195		W-T	RHL_heterolat	0.0243902	0.0243902		0.13		0.135		0.08		0.07		0.21		0.205		4.7619		4.87805		24.975		24.9759		118.929		121.834		120.381
W-T	L-R_forelimbs	0.521739	0.521739		W-T	L-R_hindlimbs	0.510638	0.510638		W-T	RHL_homolat	0.510638	0.510638		W-T	RHL_heterolat	0.0425532	0.0425532		0.135		0.135		0.095		0.1		0.23		0.235		4.34783		4.25532		23.8405		23.8223		103.655		101.371		102.513
W-T	L-R_forelimbs	0.491525	0.508475		W-T	L-R_hindlimbs	0.451613	0.548387		W-T	RHL_homolat	0.5	0.5		W-T	RHL_heterolat	1	0		0.13		0.15		0.165		0.16		0.295		0.31		3.38983		3.22581		15.7495		19.7596		53.3883		63.7406		58.5644
W-T	L-R_forelimbs	0.54	0.54		W-T	L-R_hindlimbs	0.481481	0.518519		W-T	RHL_homolat	0.481481	0.518519		W-T	RHL_heterolat	0.016129	0.016129		0.13		0.13		0.12		0.14		0.25		0.27		4		3.7037		20.436		15.3851		81.7441		56.9819		69.363
W-T	L-R_forelimbs	0.52381	0.52381		W-T	L-R_hindlimbs	0.477273	0.522727		W-T	RHL_homolat	0.522727	0.522727		W-T	RHL_heterolat	1	0		0.12		0.135		0.09		0.085		0.21		0.22		4.7619		4.54545		30.888		21.9865		147.086		99.9388		123.512
W-T	L-R_forelimbs	0.48	0.52		W-T	L-R_hindlimbs	0.479167	0.520833		W-T	RHL_homolat	0.541667	0.541667		W-T	RHL_heterolat	0.979167	0.0208333		0.145		0.145		0.105		0.095		0.25		0.24		4		4.16667		19.1461		17.7254		76.5844		73.8559		75.2202
W-T	L-R_forelimbs	0.52381	0.52381		W-T	L-R_hindlimbs	0.513514	0.513514		W-T	RHL_homolat	0.540541	0.540541		W-T	RHL_heterolat	0.95122	0.04878		0.12		0.11		0.09		0.075		0.21		0.185		4.7619		5.40541		24.2416		22.8282		115.436		123.396		119.416
W-T	L-R_forelimbs	0.488372	0.511628		W-T	L-R_hindlimbs	0.477273	0.522727		W-T	RHL_homolat	0.477273	0.522727		W-T	RHL_heterolat	1	0		0.13		0.13		0.085		0.09		0.215		0.22		4.65116		4.54545		32.124		32.6695		149.414		148.498		148.956
W-T	L-R_forelimbs	0.538462	0.538462		W-T	L-R_hindlimbs	0.55	0.55		W-T	RHL_homolat	0.525	0.525		W-T	RHL_heterolat	0.1	0.1		0.12		0.14		0.075		0.06		0.195		0.2		5.12821		5		23.6457		23.7668		121.26		118.834		120.047
W-T	L-R_forelimbs	0.519231	0.519231		W-T	L-R_hindlimbs	0.530612	0.530612		W-T	RHL_homolat	0.489796	0.510204		W-T	RHL_heterolat	0.102041	0.102041		0.15		0.155		0.11		0.09		0.26		0.245		3.84615		4.08163		19.4549		19.8637		74.8265		81.0765		77.9515
W-T	L-R_forelimbs	0.521739	0.521739		W-T	L-R_hindlimbs	0.456522	0.543478		W-T	RHL_homolat	0.521739	0.521739		W-T	RHL_heterolat	0.0434783	0.0434783		0.135		0.155		0.095		0.075		0.23		0.23		4.34783		4.34783		23.7022		21.6384		103.053		94.0802		98.5665
W-T	L-R_forelimbs	0.533333	0.533333		W-T	L-R_hindlimbs	0.489362	0.510638		W-T	RHL_homolat	0.531915	0.531915		W-T	RHL_heterolat	0.0851064	0.0851064		0.125		0.15		0.1		0.085		0.225		0.235		4.44444		4.25532		24.8447		24.0972		110.421		102.541		106.481
W-T	L-R_forelimbs	0.474576	0.525424		W-T	L-R_hindlimbs	0.467742	0.532258		W-T	RHL_homolat	0.467742	0.532258		W-T	RHL_heterolat	0.919355	0.0806452		0.17		0.175		0.125		0.135		0.295		0.31		3.38983		3.22581		20.4363		20.9911		69.2756		67.7134		68.4945
W-T	L-R_forelimbs	0.542373	0.542373		W-T	L-R_hindlimbs	0.508772	0.508772		W-T	RHL_homolat	0.473684	0.526316		W-T	RHL_heterolat	0.0322581	0.0322581		0.17		0.16		0.125		0.125		0.295		0.285		3.38983		3.50877		18.3266		19.0503		62.124		66.8431		64.4835
W-T	L-R_forelimbs	0.511111	0.511111		W-T	L-R_hindlimbs	0.547619	0.547619		W-T	RHL_homolat	0.547619	0.547619		W-T	RHL_heterolat	0.0784314	0.0784314		0.13		0.14		0.095		0.07		0.225		0.21		4.44444		4.7619		24.1942		24.0569		107.53		114.557		111.043
W-T	L-R_forelimbs	0.52381	0.52381		W-T	L-R_hindlimbs	0.545455	0.545455		W-T	RHL_homolat	0.568182	0.568182		W-T	RHL_heterolat	0.0714286	0.0714286		0.12		0.145		0.09		0.075		0.21		0.22		4.7619		4.54545		20.8365		20.8444		99.2214		94.7472		96.9843
W-T	L-R_forelimbs	0.545455	0.545455		W-T	L-R_hindlimbs	0.511628	0.511628		W-T	RHL_homolat	0.488372	0.511628		W-T	RHL_heterolat	0.948718	0.0512821		0.155		0.13		0.12		0.085		0.275		0.215		3.63636		4.65116		21.6582		20.7588		78.757		96.5524		87.6547
W-T	L-R_forelimbs	0.527778	0.527778		W-T	L-R_hindlimbs	0.477273	0.522727		W-T	RHL_homolat	0.613636	0.613636		W-T	RHL_heterolat	0.204545	0.204545		0.09		0.13		0.09		0.09		0.18		0.22		5.55556		4.54545		26.5294		26.6894		147.386		121.315		134.35
W-T	L-R_forelimbs	0.489362	0.510638		W-T	L-R_hindlimbs	0.465116	0.534884		W-T	RHL_homolat	0.534884	0.534884		W-T	RHL_heterolat	0.0697674	0.0697674		0.12		0.125		0.115		0.09		0.235		0.215		4.25532		4.65116		21.1336		21.1827		89.9303		98.5244		94.2273
W-T	L-R_forelimbs	0.534884	0.534884		W-T	L-R_hindlimbs	0.477273	0.522727		W-T	RHL_homolat	0.545455	0.545455		W-T	RHL_heterolat	0.136364	0.136364		0.115		0.135		0.1		0.085		0.215		0.22		4.65116		4.54545		20.119		20.4441		93.5768		92.9277		93.2523
W-T	L-R_forelimbs	0.511628	0.511628		W-T	L-R_hindlimbs	0.510638	0.510638		W-T	RHL_homolat	0.468085	0.531915		W-T	RHL_heterolat	0.978723	0.0212766		0.125		0.15		0.09		0.085		0.215		0.235		4.65116		4.25532		22.3629		19.8504		104.014		84.4698		94.2417
W-T	L-R_forelimbs	0.463415	0.536585		W-T	L-R_hindlimbs	0.465116	0.534884		W-T	RHL_homolat	0.511628	0.511628		W-T	RHL_heterolat	0.0212766	0.0212766		0.12		0.14		0.085		0.075		0.205		0.215		4.87805		4.65116		21.6096		23.1568		105.413		107.706		106.559
W-T	L-R_forelimbs	0.489362	0.510638		W-T	L-R_hindlimbs	0.511628	0.511628		W-T	RHL_homolat	0.55814	0.55814		W-T	RHL_heterolat	0.0465116	0.0465116		0.11		0.13		0.125		0.085		0.235		0.215		4.25532		4.65116		18.7467		18.5468		79.7731		86.2642		83.0186
W-T	L-R_forelimbs	0.521739	0.521739		W-T	L-R_hindlimbs	0.511111	0.511111		W-T	RHL_homolat	0.511111	0.511111		W-T	RHL_heterolat	0.0666667	0.0666667		0.13		0.15		0.1		0.075		0.23		0.225		4.34783		4.44444		23.2104		24.5479		100.915		109.102		105.008
W-T	L-R_forelimbs	0.52381	0.52381		W-T	L-R_hindlimbs	0.477273	0.522727		W-T	RHL_homolat	0.477273	0.522727		W-T	RHL_heterolat	0.0454545	0.0454545		0.125		0.135		0.085		0.085		0.21		0.22		4.7619		4.54545		21.3417		21.2905		101.627		96.7749		99.2011
W-T	L-R_forelimbs	0.52381	0.52381		W-T	L-R_hindlimbs	0.454545	0.545455		W-T	RHL_homolat	0.545455	0.545455		W-T	RHL_heterolat	0.0909091	0.0909091		0.1		0.13		0.11		0.09		0.21		0.22		4.7619		4.54545		17.2876		17.2383		82.3221		78.356		80.3391
W-T	L-R_forelimbs	0.469388	0.530612		W-T	L-R_hindlimbs	0.52	0.52		W-T	RHL_homolat	0.54	0.54		W-T	RHL_heterolat	0.02	0.02		0.125		0.12		0.12		0.13		0.245		0.25		4.08163		4		20.1146		27.6276		82.1004		110.51		96.3053
W-T	L-R_forelimbs	0.47619	0.52381		W-T	L-R_hindlimbs	0.466667	0.533333		W-T	RHL_homolat	0.511111	0.511111		W-T	RHL_heterolat	0.0222222	0.0222222		0.12		0.14		0.09		0.085		0.21		0.225		4.7619		4.44444		22.4254		20.745		106.787		92.1999		99.4937
W-T	L-R_forelimbs	0.465116	0.534884		W-T	L-R_hindlimbs	0.475	0.525		W-T	RHL_homolat	0.525	0.525		W-T	RHL_heterolat	0.953488	0.0465116		0.12		0.13		0.095		0.07		0.215		0.2		4.65116		5		19.4708		21.4807		90.5618		107.403		98.9825
W-T	L-R_forelimbs	0.52	0.52		W-T	L-R_hindlimbs	0.508772	0.508772		W-T	RHL_homolat	0.491228	0.508772		W-T	RHL_heterolat	0.0701754	0.0701754		0.13		0.17		0.12		0.115		0.25		0.285		4		3.50877		19.5995		18.9059		78.398		66.3365		72.3673
W-T	L-R_forelimbs	0.478261	0.521739		W-T	L-R_hindlimbs	0.541667	0.541667		W-T	RHL_homolat	0.541667	0.541667		W-T	RHL_heterolat	0.0416667	0.0416667		0.115		0.145		0.115		0.095		0.23		0.24		4.34783		4.16667		19.8537		19.1254		86.3204		79.6892		83.0048
W-T	L-R_forelimbs	0.458333	0.541667		W-T	L-R_hindlimbs	0.454545	0.545455		W-T	RHL_homolat	0.545455	0.545455		W-T	RHL_heterolat	0.958333	0.0416667		0.13		0.135		0.11		0.085		0.24		0.22		4.16667		4.54545		30.7738		19.9048		128.224		90.4762		109.35
W-T	L-R_forelimbs	0.488372	0.511628		W-T	L-R_hindlimbs	0.511628	0.511628		W-T	RHL_homolat	0.534884	0.534884		W-T	RHL_heterolat	0.0232558	0.0232558		0.125		0.15		0.09		0.065		0.215		0.215		4.65116		4.65116		22.1961		23.8001		103.238		110.698		106.968
W-T	L-R_forelimbs	0.538462	0.538462		W-T	L-R_hindlimbs	0.52381	0.52381		W-T	RHL_homolat	0.52381	0.52381		W-T	RHL_heterolat	0.0952381	0.0952381		0.11		0.145		0.085		0.065		0.195		0.21		5.12821		4.7619		23.9564		22.1294		122.853		105.378		114.116
W-T	L-R_forelimbs	0.522727	0.522727		W-T	L-R_hindlimbs	0.547619	0.547619		W-T	RHL_homolat	0.595238	0.595238		W-T	RHL_heterolat	0.0952381	0.0952381		0.12		0.15		0.1		0.06		0.22		0.21		4.54545		4.7619		23.5439		24.0733		107.018		114.635		110.826
W-T	L-R_forelimbs	0.542373	0.542373		W-T	L-R_hindlimbs	0.483871	0.516129		W-T	RHL_homolat	0.467742	0.532258		W-T	RHL_heterolat	1	0		0.135		0.16		0.16		0.15		0.295		0.31		3.38983		3.22581		16.3313		18.6309		55.3604		60.0995		57.73
W-T	L-R_forelimbs	0.479167	0.520833		W-T	L-R_hindlimbs	0.509091	0.509091		W-T	RHL_homolat	0.454545	0.545455		W-T	RHL_heterolat	0.0322581	0.0322581		0.115		0.14		0.125		0.135		0.24		0.275		4.16667		3.63636		18.1589		18.6294		75.6622		67.7434		71.7028
W-T	L-R_forelimbs	0.468085	0.531915		W-T	L-R_hindlimbs	0.468085	0.531915		W-T	RHL_homolat	0.531915	0.531915		W-T	RHL_heterolat	0.0212766	0.0212766		0.115		0.145		0.12		0.09		0.235		0.235		4.25532		4.25532		17.7512		20.9034		75.537		88.9505		82.2438
W-T	L-R_forelimbs	0.52381	0.52381		W-T	L-R_hindlimbs	0.465116	0.534884		W-T	RHL_homolat	0.488372	0.511628		W-T	RHL_heterolat	1	0		0.125		0.14		0.085		0.075		0.21		0.215		4.7619		4.65116		23.6649		20.9277		112.69		97.338		105.014
W-T	L-R_forelimbs	0.521739	0.521739		W-T	L-R_hindlimbs	0.477273	0.522727		W-T	RHL_homolat	0.5	0.5		W-T	RHL_heterolat	0.977273	0.0227273		0.115		0.15		0.09		0.075		0.205		0.225		4.87805		4.44444		23.1419		31.6416		112.887		140.629		126.758
W-T	L-R_forelimbs	0.536585	0.536585		W-T	L-R_hindlimbs	0.511111	0.511111		W-T	RHL_homolat	0.466667	0.533333		W-T	RHL_heterolat	1	0		0.11		0.145		0.095		0.07		0.205		0.215		4.87805		4.65116		21.1829		23.7145		103.331		110.3		106.816
G	L-R_forelimbs	0.210526	0.789474		G	L-R_hindlimbs	0.2	0.8		G	RHL_homolat	0.5	0.5		G	RHL_heterolat	0.3	0.3		0.13		0.12		0.06		0.08		0.19		0.2		5.26316		5		25.3233		39.8698		133.281		199.349		166.315
G	L-R_forelimbs	0.25641	0.74359		G	L-R_hindlimbs	0.216216	0.783784		G	RHL_homolat	0.432432	0.567568		G	RHL_heterolat	0.810811	0.189189		0.12		0.115		0.075		0.07		0.195		0.185		5.12821		5.40541		21.9362		21.7729		112.493		117.691		115.092
G	L-R_forelimbs	0.347826	0.652174		G	L-R_hindlimbs	0.32	0.68		G	RHL_homolat	0.52	0.52		G	RHL_heterolat	0.0833333	0.0833333		0.1		0.1		0.13		0.15		0.23		0.25		4.34783		4		16.3822		14.9892		71.2269		59.9567		65.5918
G	L-R_forelimbs	0.35	0.65		G	L-R_hindlimbs	0.315789	0.684211		G	RHL_homolat	0.526316	0.526316		G	RHL_heterolat	0.944444	0.0555556		0.11		0.12		0.09		0.07		0.2		0.19		5		5.26316		22.2622		22.048		111.311		116.042		113.676
G	L-R_forelimbs	0.333333	0.666667		G	L-R_hindlimbs	0.157895	0.842105		G	RHL_homolat	0.368421	0.631579		G	RHL_heterolat	0.722222	0.277778		0.11		0.11		0.07		0.08		0.18		0.19		5.55556		5.26316		22.6008		23.9764		125.56		126.192		125.876
G	L-R_forelimbs	0.315789	0.684211		G	L-R_hindlimbs	0.166667	0.833333		G	RHL_homolat	0.444444	0.555556		G	RHL_heterolat	0.777778	0.222222		0.13		0.11		0.06		0.07		0.19		0.18		5.26316		5.55556		26.9162		21.4666		141.664		119.259		130.462
G	L-R_forelimbs	0.333333	0.666667		G	L-R_hindlimbs	0.176471	0.823529		G	RHL_homolat	0.411765	0.588235		G	RHL_heterolat	0.764706	0.235294		0.11		0.1		0.07		0.07		0.18		0.17		5.55556		5.88235		27.2224		27.5416		151.236		162.009		156.622
G	L-R_forelimbs	0.166667	0.833333		G	L-R_hindlimbs	0.176471	0.823529		G	RHL_homolat	0.411765	0.588235		G	RHL_heterolat	0.235294	0.235294		0.11		0.1		0.08		0.07		0.19		0.17		5.26316		5.88235		18.9569		42.44		99.7734		249.647		174.71
G	L-R_forelimbs	0.315789	0.684211		G	L-R_hindlimbs	0.157895	0.842105		G	RHL_homolat	0.421053	0.578947		G	RHL_heterolat	0.315789	0.315789		0.11		0.12		0.08		0.07		0.19		0.19		5.26316		5.26316		20.8041		25.7141		109.495		135.337		122.416
G	L-R_forelimbs	0.333333	0.666667		G	L-R_hindlimbs	0.157895	0.842105		G	RHL_homolat	0.368421	0.631579		G	RHL_heterolat	0.263158	0.263158		0.12		0.11		0.09		0.1		0.21		0.21		4.7619		4.7619		44.4107		45.4272		211.479		216.32		213.9
G	L-R_forelimbs	0.333333	0.666667		G	L-R_hindlimbs	0.190476	0.809524		G	RHL_homolat	0.428571	0.571429		G	RHL_heterolat	0.238095	0.238095		0.09		0.09		0.1		0.1		0.19		0.19		5.26316		5.26316		17.5249		15.806		92.2362		83.1896		87.7129
G	L-R_forelimbs	0.315789	0.684211		G	L-R_hindlimbs	0.157895	0.842105		G	RHL_homolat	0.421053	0.578947		G	RHL_heterolat	0.263158	0.263158		0.12		0.12		0.07		0.07		0.19		0.19		5.26316		5.26316		24.4052		26.1796		128.448		137.787		133.118
G	L-R_forelimbs	0.315789	0.684211		G	L-R_hindlimbs	0.157895	0.842105		G	RHL_homolat	0.444444	0.555556		G	RHL_heterolat	0.222222	0.222222		0.14		0.1		0.05		0.08		0.19		0.18		5.26316		5.55556		24.8593		38.4982		130.838		213.879		172.359
G	L-R_forelimbs	0.333333	0.666667		G	L-R_hindlimbs	0.157895	0.842105		G	RHL_homolat	0.421053	0.578947		G	RHL_heterolat	0.157895	0.157895		0.11		0.11		0.07		0.08		0.18		0.19		5.55556		5.26316		39.1913		24.6036		217.729		129.492		173.611
G	L-R_forelimbs	0.340426	0.659574		G	L-R_hindlimbs	0.319149	0.680851		G	RHL_homolat	0.510638	0.510638		G	RHL_heterolat	0.851064	0.148936		0.11		0.11		0.105		0.11		0.215		0.22		4.65116		4.54545		16.1765		16.6141		75.2395		75.5185		75.379
G	L-R_forelimbs	0.305556	0.694444		G	L-R_hindlimbs	0.162162	0.837838		G	RHL_homolat	0.513514	0.513514		G	RHL_heterolat	0.810811	0.189189		0.11		0.105		0.085		0.105		0.195		0.21		5.12821		4.7619		21.2668		19.6829		109.06		93.7281		101.394
G	L-R_forelimbs	0.333333	0.666667		G	L-R_hindlimbs	0.314286	0.685714		G	RHL_homolat	0.485714	0.514286		G	RHL_heterolat	0.176471	0.176471		0.11		0.1		0.07		0.075		0.18		0.175		5.55556		5.71429		22.5765		29.9526		125.425		171.158		148.291
G	L-R_forelimbs	0.172414	0.827586		G	L-R_hindlimbs	0.171429	0.828571		G	RHL_homolat	0.428571	0.571429		G	RHL_heterolat	0.285714	0.285714		0.09		0.115		0.055		0.06		0.145		0.175		6.89655		5.71429		25.8505		25.0237		178.279		142.993		160.636
G	L-R_forelimbs	0.333333	0.666667		G	L-R_hindlimbs	0.193548	0.806452		G	RHL_homolat	0.451613	0.548387		G	RHL_heterolat	0.69697	0.30303		0.1		0.095		0.065		0.06		0.165		0.155		6.06061		6.45161		23.8697		23.5902		144.665		152.195		148.43
G	L-R_forelimbs	0.823529	0.823529		G	L-R_hindlimbs	0.842105	0.842105		G	RHL_homolat	0.368421	0.631579		G	RHL_heterolat	0.210526	0.210526		0.1		0.11		0.07		0.08		0.17		0.19		5.88235		5.26316		26.7648		27.2051		157.44		143.185		150.312
G	L-R_forelimbs	0.666667	0.666667		G	L-R_hindlimbs	0.83871	0.83871		G	RHL_homolat	0.516129	0.516129		G	RHL_heterolat	0.354839	0.354839		0.105		0.1		0.06		0.055		0.165		0.155		6.06061		6.45161		28.2016		27.8316		170.919		179.559		175.239
G	L-R_forelimbs	0.314286	0.685714		G	L-R_hindlimbs	0.153846	0.846154		G	RHL_homolat	0.564103	0.564103		G	RHL_heterolat	0.846154	0.153846		0.095		0.125		0.08		0.07		0.175		0.195		5.71429		5.12821		23.4517		23.0708		134.01		118.312		126.161
G	L-R_forelimbs	0.317073	0.682927		G	L-R_hindlimbs	0.170732	0.829268		G	RHL_homolat	0.414634	0.585366		G	RHL_heterolat	0.75	0.25		0.12		0.115		0.085		0.09		0.205		0.205		4.87805		4.87805		23.2793		19.1021		113.558		93.1811		103.369
G	L-R_forelimbs	0.302326	0.697674		G	L-R_hindlimbs	0.170732	0.829268		G	RHL_homolat	0.390244	0.609756		G	RHL_heterolat	0.707317	0.292683		0.135		0.125		0.08		0.08		0.215		0.205		4.65116		4.87805		22.2043		22.5394		103.276		109.949		106.612
G	L-R_forelimbs	0.317073	0.682927		G	L-R_hindlimbs	0.195122	0.804878		G	RHL_homolat	0.390244	0.609756		G	RHL_heterolat	0.707317	0.292683		0.125		0.125		0.08		0.08		0.205		0.205		4.87805		4.87805		20.9169		21.1999		102.034		103.414		102.724
G	L-R_forelimbs	0.657895	0.657895		G	L-R_hindlimbs	0.833333	0.833333		G	RHL_homolat	0.666667	0.666667		G	RHL_heterolat	0.305556	0.305556		0.105		0.11		0.085		0.07		0.19		0.18		5.26316		5.55556		24.516		22.7985		129.031		126.659		127.845
G	L-R_forelimbs	0.302326	0.697674		G	L-R_hindlimbs	0.25	0.75		G	RHL_homolat	0.568182	0.568182		G	RHL_heterolat	0.863636	0.136364		0.145		0.105		0.12		0.135		0.265		0.24		3.77358		4.16667		18.2992		18.5247		69.0535		77.1863		73.1199
G	L-R_forelimbs	0.75	0.75		G	L-R_hindlimbs	0.815789	0.815789		G	RHL_homolat	0.526316	0.526316		G	RHL_heterolat	0.263158	0.263158		0.135		0.12		0.065		0.07		0.2		0.19		5		5.26316		29.8836		33.7842		149.418		177.811		163.615
G	L-R_forelimbs	0.315789	0.684211		G	L-R_hindlimbs	0.222222	0.777778		G	RHL_homolat	0.444444	0.555556		G	RHL_heterolat	0.8	0.2		0.11		0.11		0.08		0.07		0.19		0.18		5.26316		5.55556		20.6438		20.1287		108.651		111.826		110.239
G	L-R_forelimbs	0.333333	0.666667		G	L-R_hindlimbs	0.227273	0.772727		G	RHL_homolat	0.363636	0.636364		G	RHL_heterolat	0.333333	0.333333		0.14		0.1		0.05		0.08		0.19		0.18		5.26316		5.55556		26.9143		25.3527		141.654		140.848		141.251
G	L-R_forelimbs	0.684211	0.684211		G	L-R_hindlimbs	0.777778	0.777778		G	RHL_homolat	0.611111	0.611111		G	RHL_heterolat	0.263158	0.263158		0.11		0.12		0.08		0.06		0.19		0.18		5.26316		5.55556		22.9246		19.9488		120.656		110.827		115.741
G	L-R_forelimbs	0.35	0.65		G	L-R_hindlimbs	0.210526	0.789474		G	RHL_homolat	0.315789	0.684211		G	RHL_heterolat	0.315789	0.315789		0.12		0.12		0.08		0.07		0.2		0.19		5		5.26316		19.9758		19.7971		99.879		104.195		102.037
G	L-R_forelimbs	0.333333	0.666667		G	L-R_hindlimbs	0.2	0.8		G	RHL_homolat	0.352941	0.647059		G	RHL_heterolat	0.176471	0.176471		0.11		0.1		0.07		0.07		0.18		0.17		5.55556		5.88235		43.4711		44.5033		241.506		261.784		251.645
G	L-R_forelimbs	0.35	0.65		G	L-R_hindlimbs	0.228571	0.771429		G	RHL_homolat	0.428571	0.571429		G	RHL_heterolat	0.828571	0.171429		0.105		0.105		0.065		0.06		0.17		0.165		5.88235		6.06061		23.3623		24.2975		137.425		147.257		142.341
G	L-R_forelimbs	0.302326	0.697674		G	L-R_hindlimbs	0.205128	0.794872		G	RHL_homolat	0.384615	0.615385		G	RHL_heterolat	0.15	0.15		0.145		0.12		0.07		0.075		0.215		0.195		4.65116		5.12821		28.0472		33.8018		130.452		173.342		151.897
G	L-R_forelimbs	0.333333	0.666667		G	L-R_hindlimbs	0.205882	0.794118		G	RHL_homolat	0.470588	0.529412		G	RHL_heterolat	0.1875	0.1875		0.095		0.095		0.07		0.065		0.165		0.16		6.06061		6.25		20.0025		29.7196		121.228		185.747		153.487
G	L-R_forelimbs	0.315789	0.684211		G	L-R_hindlimbs	0.204545	0.795455		G	RHL_homolat	0.454545	0.545455		G	RHL_heterolat	0.860465	0.139535		0.105		0.13		0.085		0.09		0.19		0.22		5.26316		4.54545		20.66		23.5489		108.737		107.04		107.889
G	L-R_forelimbs	0.35	0.65		G	L-R_hindlimbs	0.268293	0.731707		G	RHL_homolat	0.439024	0.560976		G	RHL_heterolat	0.780488	0.219512		0.13		0.125		0.07		0.08		0.2		0.205		5		4.87805		30.051		30.4256		150.255		148.417		149.336
G	L-R_forelimbs	0.35	0.65		G	L-R_hindlimbs	0.3	0.7		G	RHL_homolat	0.475	0.525		G	RHL_heterolat	0.85	0.15		0.12		0.125		0.08		0.075		0.2		0.2		5		5		22.3063		30.5328		111.532		152.664		132.098
G	L-R_forelimbs	0.666667	0.666667		G	L-R_hindlimbs	0.763158	0.763158		G	RHL_homolat	0.631579	0.631579		G	RHL_heterolat	0.263158	0.263158		0.125		0.11		0.085		0.08		0.21		0.19		4.7619		5.26316		33.2664		22.586		158.412		118.874		138.643
G	L-R_forelimbs	0.307692	0.692308		G	L-R_hindlimbs	0.25641	0.74359		G	RHL_homolat	0.512821	0.512821		G	RHL_heterolat	0.794118	0.205882		0.1		0.11		0.095		0.085		0.195		0.195		5.12821		5.12821		20.6856		18.2848		106.08		93.7684		99.9243
G	L-R_forelimbs	0.294118	0.705882		G	L-R_hindlimbs	0.157895	0.842105		G	RHL_homolat	0.421053	0.578947		G	RHL_heterolat	0.684211	0.315789		0.11		0.12		0.06		0.07		0.17		0.19		5.88235		5.26316		23.2334		24.7004		136.667		130.002		133.335
G	L-R_forelimbs	0.285714	0.714286		G	L-R_hindlimbs	0.166667	0.833333		G	RHL_homolat	0.5	0.5		G	RHL_heterolat	0.684211	0.315789		0.13		0.09		0.08		0.09		0.21		0.18		4.7619		5.55556		23.4836		16.3215		111.827		90.675		101.251
G	L-R_forelimbs	0.263158	0.736842		G	L-R_hindlimbs	0.166667	0.833333		G	RHL_homolat	0.421053	0.578947		G	RHL_heterolat	0.157895	0.157895		0.1		0.1		0.09		0.09		0.19		0.19		5.26316		5.26316		19.1135		45.3627		100.597		238.751		169.674
G	L-R_forelimbs	0.3	0.7		G	L-R_hindlimbs	0.157895	0.842105		G	RHL_homolat	0.421053	0.578947		G	RHL_heterolat	0.157895	0.157895		0.1		0.1		0.1		0.09		0.2		0.19		5		5.26316		14.296		19.3637		71.4799		101.914		86.697
G	L-R_forelimbs	0.235294	0.764706		G	L-R_hindlimbs	0.166667	0.833333		G	RHL_homolat	0.444444	0.555556		G	RHL_heterolat	0.277778	0.277778		0.1		0.12		0.09		0.1		0.19		0.22		5.26316		4.54545		22.2095		22.221		116.892		101.005		108.948
G	L-R_forelimbs	0.257143	0.742857		G	L-R_hindlimbs	0.184211	0.815789		G	RHL_homolat	0.473684	0.526316		G	RHL_heterolat	0.710526	0.289474		0.11		0.11		0.07		0.075		0.18		0.185		5.55556		5.40541		24.0395		22.7469		133.553		122.956		128.255
G	L-R_forelimbs	0.275	0.725		G	L-R_hindlimbs	0.162162	0.837838		G	RHL_homolat	0.459459	0.540541		G	RHL_heterolat	0.25	0.25		0.115		0.1		0.1		0.1		0.215		0.2		4.65116		5		17.9835		17.7816		83.6442		88.9081		86.2762
G	L-R_forelimbs	0.285714	0.714286		G	L-R_hindlimbs	0.181818	0.818182		G	RHL_homolat	0.454545	0.545455		G	RHL_heterolat	0.151515	0.151515		0.105		0.105		0.07		0.06		0.175		0.165		5.71429		6.06061		20.0084		18.6652		114.334		113.122		113.728
G	L-R_forelimbs	0.702703	0.702703		G	L-R_hindlimbs	0.825	0.825		G	RHL_homolat	0.575	0.575		G	RHL_heterolat	0.264706	0.264706		0.11		0.13		0.075		0.07		0.185		0.2		5.40541		5		23.7735		24.9474		128.505		124.737		126.621
G	L-R_forelimbs	0.702703	0.702703		G	L-R_hindlimbs	0.842105	0.842105		G	RHL_homolat	0.631579	0.631579		G	RHL_heterolat	0.3	0.3		0.105		0.12		0.08		0.07		0.185		0.19		5.40541		5.26316		26.9257		26.4752		145.545		139.343		142.444
HB	L-R_forelimbs	0.25	0.75		HB	L-R_hindlimbs	1	1		HB	RHL_homolat	0.4	0.6		HB	RHL_heterolat	0.6	0.4		0.11		0.1		0.05		0.05		0.16		0.15		6.25		6.66667		29.0521		29.377		181.576		195.846		188.711
HB	L-R_forelimbs	0.25	0.75		HB	L-R_hindlimbs	1	1		HB	RHL_homolat	0.428571	0.571429		HB	RHL_heterolat	0.714286	0.285714		0.11		0.1		0.05		0.04		0.16		0.14		6.25		7.14286		27.371		26.4485		171.069		188.918		179.993
HB	L-R_forelimbs	0.25	0.75		HB	L-R_hindlimbs	1	1		HB	RHL_homolat	0.5	0.5		HB	RHL_heterolat	0.833333	0.166667		0.11		0.13		0.06		0.05		0.17		0.18		5.88235		5.55556		24.4296		22.5368		143.703		125.204		134.454
HB	L-R_forelimbs	0.25	0.75		HB	L-R_hindlimbs	1	1		HB	RHL_homolat	0.277778	0.722222		HB	RHL_heterolat	0.555556	0.444444		0.13		0.12		0.07		0.06		0.2		0.18		5		5.55556		26.401		27.6604		132.005		153.669		142.837
HB	L-R_forelimbs	0.266667	0.733333		HB	L-R_hindlimbs	1	1		HB	RHL_homolat	0.444444	0.555556		HB	RHL_heterolat	0.666667	0.333333		0.11		0.13		0.05		0.05		0.16		0.18		6.25		5.55556		27.3045		27.8501		170.653		154.723		162.688
HB	L-R_forelimbs	0.733333	0.733333		HB	L-R_hindlimbs	1	1		HB	RHL_homolat	0.647059	0.647059		HB	RHL_heterolat	0.411765	0.411765		0.1		0.12		0.05		0.05		0.15		0.17		6.66667		5.88235		24.3888		25.9058		162.592		152.387		157.489
HB	L-R_forelimbs	0.733333	0.733333		HB	L-R_hindlimbs	1	1		HB	RHL_homolat	0.714286	0.714286		HB	RHL_heterolat	0.357143	0.357143		0.1		0.08		0.05		0.06		0.15		0.14		6.66667		7.14286		23.8754		21.2888		159.169		152.063		155.616
HB	L-R_forelimbs	0.277778	0.722222		HB	L-R_hindlimbs	1	1		HB	RHL_homolat	0.375	0.625		HB	RHL_heterolat	0.75	0.25		0.12		0.09		0.06		0.07		0.18		0.16		5.55556		6.25		27.7296		25.2881		154.053		158.051		156.052
HB	L-R_forelimbs	0.222222	0.777778		HB	L-R_hindlimbs	0	1		HB	RHL_homolat	0.333333	0.666667		HB	RHL_heterolat	0.470588	0.470588		0.12		0.1		0.06		0.07		0.18		0.17		5.55556		5.88235		24.0539		26.2596		133.633		154.468		144.05
HB	L-R_forelimbs	0.277778	0.722222		HB	L-R_hindlimbs	0	1		HB	RHL_homolat	0.294118	0.705882		HB	RHL_heterolat	0.421053	0.421053		0.12		0.11		0.06		0.08		0.18		0.19		5.55556		5.26316		22.2531		24.7173		123.628		130.091		126.86
HB	L-R_forelimbs	0.8	0.8		HB	L-R_hindlimbs	1	1		HB	RHL_homolat	0.5625	0.5625		HB	RHL_heterolat	0.375	0.375		0.09		0.09		0.06		0.07		0.15		0.16		6.66667		6.25		23.8714		27.1719		159.143		169.824		164.483
HB	L-R_forelimbs	0.705882	0.705882		HB	L-R_hindlimbs	1	1		HB	RHL_homolat	0.666667	0.666667		HB	RHL_heterolat	0.333333	0.333333		0.12		0.09		0.05		0.06		0.17		0.15		5.88235		6.66667		26.5639		25.6994		156.258		171.329		163.794
HB	L-R_forelimbs	0.210526	0.789474		HB	L-R_hindlimbs	1	1		HB	RHL_homolat	0.318182	0.681818		HB	RHL_heterolat	0.5	0.5		0.13		0.12		0.06		0.1		0.19		0.22		5.26316		4.54545		31.6624		30.5328		166.644		138.786		152.715
HB	L-R_forelimbs	0.222222	0.777778		HB	L-R_hindlimbs	1	1		HB	RHL_homolat	0.333333	0.666667		HB	RHL_heterolat	0.555556	0.444444		0.13		0.13		0.05		0.05		0.18		0.18		5.55556		5.55556		31.4152		31.596		174.529		175.533		175.031
HB	L-R_forelimbs	0.2	0.8		HB	L-R_hindlimbs	0	1		HB	RHL_homolat	0.466667	0.533333		HB	RHL_heterolat	0.333333	0.333333		0.09		0.1		0.06		0.05		0.15		0.15		6.66667		6.66667		34.0695		34.9661		227.13		233.108		230.119
HB	L-R_forelimbs	0.763158	0.763158		HB	L-R_hindlimbs	1	1		HB	RHL_homolat	0.485714	0.514286		HB	RHL_heterolat	0.314286	0.314286		0.13		0.11		0.06		0.065		0.19		0.175		5.26316		5.71429		29.1483		29.2221		153.412		166.983		160.198
HB	L-R_forelimbs	0.210526	0.789474		HB	L-R_hindlimbs	0	1		HB	RHL_homolat	0.5	0.5		HB	RHL_heterolat	0.277778	0.277778		0.13		0.11		0.06		0.07		0.19		0.18		5.26316		5.55556		31.3486		35.6105		164.993		197.836		181.414
HB	L-R_forelimbs	0.774194	0.774194		HB	L-R_hindlimbs	1	1		HB	RHL_homolat	0.709677	0.709677		HB	RHL_heterolat	0.483871	0.483871		0.09		0.095		0.065		0.06		0.155		0.155		6.45161		6.45161		23.5207		21.223		151.746		136.923		144.335
HB	L-R_forelimbs	0.8	0.8		HB	L-R_hindlimbs	1	1		HB	RHL_homolat	0.567568	0.567568		HB	RHL_heterolat	0.378378	0.378378		0.105		0.13		0.07		0.055		0.175		0.185		5.71429		5.40541		35.0309		36.7773		200.177		198.796		199.486
HB	L-R_forelimbs	0.794118	0.794118		HB	L-R_hindlimbs	1	1		HB	RHL_homolat	0.617647	0.617647		HB	RHL_heterolat	0.382353	0.382353		0.1		0.12		0.07		0.05		0.17		0.17		5.88235		5.88235		25.0772		25.8962		147.513		152.33		149.922
HB	L-R_forelimbs	0.714286	0.714286		HB	L-R_hindlimbs	1	1		HB	RHL_homolat	0.631579	0.631579		HB	RHL_heterolat	0.289474	0.289474		0.1		0.11		0.075		0.08		0.175		0.19		5.71429		5.26316		27.6245		29.6958		157.854		156.294		157.074
HB	L-R_forelimbs	0.75	0.75		HB	L-R_hindlimbs	0.9375	0.9375		HB	RHL_homolat	0.625	0.625		HB	RHL_heterolat	0.375	0.375		0.11		0.1		0.05		0.06		0.16		0.16		6.25		6.25		26.7516		27.9787		167.198		174.867		171.032
HB	L-R_forelimbs	0.25	0.75		HB	L-R_hindlimbs	0.0625	0.9375		HB	RHL_homolat	0.4	0.6		HB	RHL_heterolat	0.666667	0.333333		0.1		0.09		0.05		0.06		0.15		0.15		6.66667		6.66667		27.6797		26.9973		184.532		179.982		182.257
HB	L-R_forelimbs	0.75	0.75		HB	L-R_hindlimbs	0.9375	0.9375		HB	RHL_homolat	0.5625	0.5625		HB	RHL_heterolat	0.3125	0.3125		0.1		0.1		0.06		0.06		0.16		0.16		6.25		6.25		27.509		28.9161		171.931		180.726		176.328
HB	L-R_forelimbs	0.75	0.75		HB	L-R_hindlimbs	0.941176	0.941176		HB	RHL_homolat	0.588235	0.588235		HB	RHL_heterolat	0.352941	0.352941		0.09		0.1		0.07		0.07		0.16		0.17		6.25		5.88235		21.8906		27.5804		136.816		162.237		149.527
HB	L-R_forelimbs	0.25	0.75		HB	L-R_hindlimbs	0.0625	0.9375		HB	RHL_homolat	0.4375	0.5625		HB	RHL_heterolat	0.75	0.25		0.13		0.1		0.07		0.06		0.2		0.16		5		6.25		28.8465		24.016		144.233		150.1		147.166
HB	L-R_forelimbs	0.25	0.75		HB	L-R_hindlimbs	0.0526316	0.947368		HB	RHL_homolat	0.421053	0.578947		HB	RHL_heterolat	0.631579	0.368421		0.11		0.12		0.05		0.07		0.16		0.19		6.25		5.26316		32.9671		31.9729		206.045		168.278		187.161
HB	L-R_forelimbs	0.25	0.75		HB	L-R_hindlimbs	0.0555556	0.944444		HB	RHL_homolat	0.5	0.5		HB	RHL_heterolat	0.222222	0.222222		0.12		0.09		0.07		0.1		0.19		0.19		5.26316		5.26316		24.1702		38.514		127.212		202.705		164.958
HB	L-R_forelimbs	0.25	0.75		HB	L-R_hindlimbs	0.0909091	0.909091		HB	RHL_homolat	0.454545	0.545455		HB	RHL_heterolat	0.588235	0.411765		0.095		0.095		0.065		0.07		0.16		0.165		6.25		6.06061		20.0674		33.0605		125.421		200.366		162.894
HB	L-R_forelimbs	0.75	0.75		HB	L-R_hindlimbs	0.970588	0.970588		HB	RHL_homolat	0.676471	0.676471		HB	RHL_heterolat	0.470588	0.470588		0.09		0.11		0.05		0.06		0.14		0.17		7.14286		5.88235		26.9808		26.6101		192.72		156.53		174.625
HB	L-R_forelimbs	0.75	0.75		HB	L-R_hindlimbs	0.935484	0.935484		HB	RHL_homolat	0.645161	0.645161		HB	RHL_heterolat	0.419355	0.419355		0.08		0.105		0.06		0.05		0.14		0.155		7.14286		6.45161		22.4955		24.3439		160.682		157.057		158.87
HB	L-R_forelimbs	0.25	0.75		HB	L-R_hindlimbs	0.0882353	0.911765		HB	RHL_homolat	0.470588	0.529412		HB	RHL_heterolat	0.647059	0.352941		0.11		0.13		0.05		0.04		0.16		0.17		6.25		5.88235		38.5881		29.2716		241.176		172.186		206.681
HB	L-R_forelimbs	0.75	0.75		HB	L-R_hindlimbs	0.923077	0.923077		HB	RHL_homolat	0.461538	0.538462		HB	RHL_heterolat	0.333333	0.333333		0.14		0.13		0.08		0.065		0.22		0.195		4.54545		5.12821		24.6845		24.7881		112.202		127.118		119.66
HB	L-R_forelimbs	0.2	0.8		HB	L-R_hindlimbs	0.0625	0.9375		HB	RHL_homolat	0.375	0.625		HB	RHL_heterolat	0.4375	0.4375		0.1		0.1		0.05		0.06		0.15		0.16		6.66667		6.25		27.9548		28.488		186.365		178.05		182.208
HB	L-R_forelimbs	0.266667	0.733333		HB	L-R_hindlimbs	0.0666667	0.933333		HB	RHL_homolat	0.411765	0.588235		HB	RHL_heterolat	0.647059	0.352941		0.11		0.11		0.04		0.06		0.15		0.17		6.66667		5.88235		29.527		31.8411		196.847		187.301		192.074
HB	L-R_forelimbs	0.294118	0.705882		HB	L-R_hindlimbs	0.0625	0.9375		HB	RHL_homolat	0.375	0.625		HB	RHL_heterolat	0.625	0.375		0.12		0.11		0.05		0.05		0.17		0.16		5.88235		6.25		28.4277		27.7301		167.222		173.313		170.267
HB	L-R_forelimbs	0.785714	0.785714		HB	L-R_hindlimbs	0.9375	0.9375		HB	RHL_homolat	0.4375	0.5625		HB	RHL_heterolat	0.25	0.25		0.08		0.1		0.06		0.06		0.14		0.16		7.14286		6.25		27.8245		29.6565		198.747		185.353		192.05
HB	L-R_forelimbs	0.705882	0.705882		HB	L-R_hindlimbs	0.941176	0.941176		HB	RHL_homolat	0.588235	0.588235		HB	RHL_heterolat	0.294118	0.294118		0.11		0.11		0.06		0.06		0.17		0.17		5.88235		5.88235		27.2776		28.1265		160.456		165.45		162.953
HB	L-R_forelimbs	0.705882	0.705882		HB	L-R_hindlimbs	0.9375	0.9375		HB	RHL_homolat	0.5625	0.5625		HB	RHL_heterolat	0.1875	0.1875		0.11		0.1		0.06		0.06		0.17		0.16		5.88235		6.25		25.4399		25.4873		149.646		159.296		154.471
HB	L-R_forelimbs	0.3	0.7		HB	L-R_hindlimbs	0.1	0.9		HB	RHL_homolat	0.368421	0.631579		HB	RHL_heterolat	0.263158	0.263158		0.13		0.1		0.07		0.09		0.2		0.19		5		5.26316		25.8029		23.0097		129.014		121.104		125.059
HB	L-R_forelimbs	0.235294	0.764706		HB	L-R_hindlimbs	0.0526316	0.947368		HB	RHL_homolat	0.277778	0.722222		HB	RHL_heterolat	0.333333	0.333333		0.12		0.11		0.05		0.07		0.17		0.18		5.88235		5.55556		24.4478		24.5596		143.811		136.442		140.126
HB	L-R_forelimbs	0.222222	0.777778		HB	L-R_hindlimbs	0.0588235	0.941176		HB	RHL_homolat	0.352941	0.647059		HB	RHL_heterolat	0.444444	0.444444		0.12		0.11		0.06		0.07		0.18		0.18		5.55556		5.55556		25.9467		25.2816		144.148		140.453		142.301
HB	L-R_forelimbs	0.8	0.8		HB	L-R_hindlimbs	0.941176	0.941176		HB	RHL_homolat	0.470588	0.529412		HB	RHL_heterolat	0.294118	0.294118		0.09		0.1		0.06		0.07		0.15		0.17		6.66667		5.88235		26.9363		30.2323		179.575		177.837		178.706
HB	L-R_forelimbs	0.705882	0.705882		HB	L-R_hindlimbs	0.944444	0.944444		HB	RHL_homolat	0.666667	0.666667		HB	RHL_heterolat	0.388889	0.388889		0.11		0.12		0.06		0.06		0.17		0.18		5.88235		5.55556		22.9904		22.4428		135.237		124.682		129.96
HB	L-R_forelimbs	0.733333	0.733333		HB	L-R_hindlimbs	0.941176	0.941176		HB	RHL_homolat	0.588235	0.588235		HB	RHL_heterolat	0.352941	0.352941		0.09		0.1		0.06		0.07		0.15		0.17		6.66667		5.88235		23.5995		25.33		157.33		149		153.165
HB	L-R_forelimbs	0.705882	0.705882		HB	L-R_hindlimbs	0.941176	0.941176		HB	RHL_homolat	0.588235	0.588235		HB	RHL_heterolat	0.294118	0.294118		0.09		0.09		0.08		0.08		0.17		0.17		5.88235		5.88235		27.6606		27.0953		162.709		159.384		161.047
HB	L-R_forelimbs	0.294118	0.705882		HB	L-R_hindlimbs	0.0588235	0.941176		HB	RHL_homolat	0.411765	0.588235		HB	RHL_heterolat	0.705882	0.294118		0.12		0.11		0.05		0.06		0.17		0.17		5.88235		5.88235		28.1535		28.9778		165.609		170.458		168.033
HB	L-R_forelimbs	0.8	0.8		HB	L-R_hindlimbs	0.941176	0.941176		HB	RHL_homolat	0.588235	0.588235		HB	RHL_heterolat	0.352941	0.352941		0.09		0.1		0.06		0.07		0.15		0.17		6.66667		5.88235		26.2006		25.2255		174.671		148.385		161.528
HB	L-R_forelimbs	0.235294	0.764706		HB	L-R_hindlimbs	0.0526316	0.947368		HB	RHL_homolat	0.333333	0.666667		HB	RHL_heterolat	0.555556	0.444444		0.12		0.11		0.05		0.07		0.17		0.18		5.88235		5.55556		27.9688		29.2343		164.523		162.413		163.468
HB	L-R_forelimbs	0.263158	0.736842		HB	L-R_hindlimbs	0.0526316	0.947368		HB	RHL_homolat	0.368421	0.631579		HB	RHL_heterolat	0.631579	0.368421		0.13		0.12		0.06		0.07		0.19		0.19		5.26316		5.26316		26.0491		27.1344		137.101		142.813		139.957
HB	L-R_forelimbs	0.285714	0.714286		HB	L-R_hindlimbs	0.1	0.9		HB	RHL_homolat	0.3	0.7		HB	RHL_heterolat	0.6	0.4		0.15		0.13		0.06		0.07		0.21		0.2		4.7619		5		28.333		29.1372		134.919		145.686		140.303
HB	L-R_forelimbs	0.277778	0.722222		HB	L-R_hindlimbs	0.0526316	0.947368		HB	RHL_homolat	0.315789	0.684211		HB	RHL_heterolat	0.578947	0.421053		0.13		0.11		0.05		0.08		0.18		0.19		5.55556		5.26316		27.8048		28.5068		154.471		150.036		152.253
HB	L-R_forelimbs	0.285714	0.714286		HB	L-R_hindlimbs	0.0526316	0.947368		HB	RHL_homolat	0.368421	0.631579		HB	RHL_heterolat	0.631579	0.368421		0.08		0.13		0.06		0.06		0.14		0.19		7.14286		5.26316		17.4569		29.4215		124.692		154.85		139.771
HB	L-R_forelimbs	0.222222	0.777778		HB	L-R_hindlimbs	0.0555556	0.944444		HB	RHL_homolat	0.352941	0.647059		HB	RHL_heterolat	0.705882	0.294118		0.14		0.11		0.04		0.06		0.18		0.17		5.55556		5.88235		29.8146		26.074		165.637		153.376		159.507
HB	L-R_forelimbs	0.222222	0.777778		HB	L-R_hindlimbs	0.0588235	0.941176		HB	RHL_homolat	0.333333	0.666667		HB	RHL_heterolat	0.555556	0.444444		0.13		0.13		0.05		0.05		0.18		0.18		5.55556		5.55556		28.4063		30.071		157.813		167.061		162.437
HB	L-R_forelimbs	0.294118	0.705882		HB	L-R_hindlimbs	0.0555556	0.944444		HB	RHL_homolat	0.368421	0.631579		HB	RHL_heterolat	0.578947	0.421053		0.12		0.13		0.05		0.06		0.17		0.19		5.88235		5.26316		25.9571		29.1669		152.689		153.51		153.099
HB	L-R_forelimbs	0.26087	0.73913		HB	L-R_hindlimbs	0.0588235	0.941176		HB	RHL_homolat	0.294118	0.705882		HB	RHL_heterolat	0.235294	0.235294		0.17		0.12		0.06		0.05		0.23		0.17		4.34783		5.88235		38.7882		35.6699		168.644		209.823		189.234
HB	L-R_forelimbs	0.2	0.8		HB	L-R_hindlimbs	0.0555556	0.944444		HB	RHL_homolat	0.388889	0.611111		HB	RHL_heterolat	0.5	0.5		0.12		0.11		0.06		0.08		0.18		0.19		5.55556		5.26316		37.0063		36.1878		205.591		190.462		198.026
HB	L-R_forelimbs	0.235294	0.764706		HB	L-R_hindlimbs	0.0625	0.9375		HB	RHL_homolat	0.444444	0.555556		HB	RHL_heterolat	0.333333	0.333333		0.09		0.11		0.08		0.08		0.17		0.19		5.88235		5.26316		15.1133		22.2314		88.9016		117.008		102.955
HB	L-R_forelimbs	0.3	0.7		HB	L-R_hindlimbs	0.0555556	0.944444		HB	RHL_homolat	0.388889	0.611111		HB	RHL_heterolat	0.277778	0.277778		0.09		0.1		0.09		0.09		0.18		0.19		5.55556		5.26316		19.1968		19.0471		106.649		100.248		103.448
HB	L-R_forelimbs	0.2	0.8		HB	L-R_hindlimbs	0.0714286	0.928571		HB	RHL_homolat	0.5	0.5		HB	RHL_heterolat	0.285714	0.285714		0.1		0.08		0.05		0.06		0.15		0.14		6.66667		7.14286		29.7381		30.1268		198.254		215.191		206.723
HB	L-R_forelimbs	0.238095	0.761905		HB	L-R_hindlimbs	0.0555556	0.944444		HB	RHL_homolat	0.333333	0.666667		HB	RHL_heterolat	0.388889	0.388889		0.13		0.1		0.08		0.08		0.21		0.18		4.7619		5.55556		34.2018		26.0128		162.866		144.516		153.691
HB	L-R_forelimbs	0.294118	0.705882		HB	L-R_hindlimbs	0.0555556	0.944444		HB	RHL_homolat	0.5	0.5		HB	RHL_heterolat	0.222222	0.222222		0.11		0.11		0.06		0.07		0.17		0.18		5.88235		5.55556		24.5548		25.6448		144.44		142.471		143.456
HB	L-R_forelimbs	0.294118	0.705882		HB	L-R_hindlimbs	0.0555556	0.944444		HB	RHL_homolat	0.444444	0.555556		HB	RHL_heterolat	0.166667	0.166667		0.1		0.11		0.07		0.07		0.17		0.18		5.88235		5.55556		46.0626		22.7721		270.957		126.511		198.734
HB	L-R_forelimbs	0.8	0.8		HB	L-R_hindlimbs	0.945946	0.945946		HB	RHL_homolat	0.621622	0.621622		HB	RHL_heterolat	0.432432	0.432432		0.095		0.11		0.06		0.075		0.155		0.185		6.45161		5.40541		21.2301		22.152		136.968		119.74		128.354
HB	L-R_forelimbs	0.205882	0.794118		HB	L-R_hindlimbs	0.0606061	0.939394		HB	RHL_homolat	0.424242	0.575758		HB	RHL_heterolat	0.636364	0.363636		0.11		0.115		0.065		0.065		0.175		0.18		5.71429		5.55556		25.3309		25.2184		144.748		140.102		142.425
HB	L-R_forelimbs	0.777778	0.777778		HB	L-R_hindlimbs	0.972973	0.972973		HB	RHL_homolat	0.628571	0.628571		HB	RHL_heterolat	0.4	0.4		0.11		0.115		0.07		0.07		0.18		0.185		5.55556		5.40541		21.5863		20.7805		119.924		112.327		116.125
HB	L-R_forelimbs	0.243243	0.756757		HB	L-R_hindlimbs	0.0769231	0.923077		HB	RHL_homolat	0.487179	0.512821		HB	RHL_heterolat	0.282051	0.282051		0.125		0.13		0.06		0.065		0.185		0.195		5.40541		5.12821		26.2488		29.3605		141.886		150.567		146.226
HB	L-R_forelimbs	0.257143	0.742857		HB	L-R_hindlimbs	0.027027	0.972973		HB	RHL_homolat	0.459459	0.540541		HB	RHL_heterolat	0.282051	0.282051		0.11		0.12		0.065		0.065		0.175		0.185		5.71429		5.40541		23.9667		25.5123		136.952		137.904		137.428
HB	L-R_forelimbs	0.27027	0.72973		HB	L-R_hindlimbs	0.0810811	0.918919		HB	RHL_homolat	0.405405	0.594595		HB	RHL_heterolat	0.315789	0.315789		0.125		0.105		0.06		0.08		0.185		0.185		5.40541		5.40541		22.0772		21.3099		119.336		115.189		117.263
HB	L-R_forelimbs	0.242424	0.757576		HB	L-R_hindlimbs	0.09375	0.90625		HB	RHL_homolat	0.5	0.5		HB	RHL_heterolat	0.243243	0.243243		0.1		0.1		0.075		0.08		0.175		0.18		5.71429		5.55556		18.7204		23.2887		106.974		129.381		118.178
HB	L-R_forelimbs	0.222222	0.777778		HB	L-R_hindlimbs	0.0909091	0.909091		HB	RHL_homolat	0.30303	0.69697		HB	RHL_heterolat	0.393939	0.393939		0.1		0.115		0.04		0.05		0.14		0.165		7.14286		6.06061		37.9393		43.673		270.995		264.685		267.84
HB	L-R_forelimbs	0.228571	0.771429		HB	L-R_hindlimbs	0.0882353	0.911765		HB	RHL_homolat	0.470588	0.529412		HB	RHL_heterolat	0.352941	0.352941		0.11		0.11		0.065		0.06		0.175		0.17		5.71429		5.88235		30.2006		31.7005		172.575		186.474		179.524
HB	L-R_forelimbs	0.25641	0.74359		HB	L-R_hindlimbs	0.0833333	0.916667		HB	RHL_homolat	0.444444	0.555556		HB	RHL_heterolat	0.305556	0.305556		0.12		0.115		0.075		0.065		0.195		0.18		5.12821		5.55556		19.793		29.1251		101.502		161.806		131.654
HB	L-R_forelimbs	0.257143	0.742857		HB	L-R_hindlimbs	0.0588235	0.941176		HB	RHL_homolat	0.382353	0.617647		HB	RHL_heterolat	0.6	0.4		0.11		0.11		0.065		0.06		0.175		0.17		5.71429		5.88235		24.453		24.619		139.731		144.817		142.274
HB	L-R_forelimbs	0.205882	0.794118		HB	L-R_hindlimbs	0.0857143	0.914286		HB	RHL_homolat	0.4	0.6		HB	RHL_heterolat	0.685714	0.314286		0.11		0.115		0.06		0.06		0.17		0.175		5.88235		5.71429		22.5448		22.3302		132.616		127.601		130.109
HB	L-R_forelimbs	0.793103	0.793103		HB	L-R_hindlimbs	0.909091	0.909091		HB	RHL_homolat	0.53125	0.53125		HB	RHL_heterolat	0.34375	0.34375		0.09		0.1		0.055		0.06		0.145		0.16		6.89655		6.25		22.8617		23.2406		157.667		145.254		151.46
HB	L-R_forelimbs	0.72973	0.72973		HB	L-R_hindlimbs	0.972222	0.972222		HB	RHL_homolat	0.555556	0.555556		HB	RHL_heterolat	0.305556	0.305556		0.115		0.115		0.07		0.065		0.185		0.18		5.40541		5.55556		34.027		34.3598		183.93		190.888		187.409
HB	L-R_forelimbs	0.78125	0.78125		HB	L-R_hindlimbs	0.972222	0.972222		HB	RHL_homolat	0.638889	0.638889		HB	RHL_heterolat	0.444444	0.444444		0.1		0.13		0.06		0.05		0.16		0.18		6.25		5.55556		26.1451		25.7825		163.407		143.236		153.321
HB	L-R_forelimbs	0.783784	0.783784		HB	L-R_hindlimbs	0.947368	0.947368		HB	RHL_homolat	0.552632	0.552632		HB	RHL_heterolat	0.263158	0.263158		0.115		0.115		0.07		0.075		0.185		0.19		5.40541		5.26316		20.8856		22.0964		112.895		116.297		114.596
HB	L-R_forelimbs	0.7	0.7		HB	L-R_hindlimbs	0.95	0.95		HB	RHL_homolat	0.55	0.55		HB	RHL_heterolat	0.3	0.3		0.12		0.125		0.08		0.075		0.2		0.2		5		5		24.0129		35.3879		120.065		176.94		148.502
HB	L-R_forelimbs	0.736842	0.736842		HB	L-R_hindlimbs	0.947368	0.947368		HB	RHL_homolat	0.578947	0.578947		HB	RHL_heterolat	0.315789	0.315789		0.125		0.12		0.065		0.07		0.19		0.19		5.26316		5.26316		33.9761		25.3865		178.822		133.613		156.217
HB	L-R_forelimbs	0.722222	0.722222		HB	L-R_hindlimbs	0.944444	0.944444		HB	RHL_homolat	0.611111	0.611111		HB	RHL_heterolat	0.333333	0.333333		0.11		0.11		0.07		0.07		0.18		0.18		5.55556		5.55556		26.9533		25.5852		149.741		142.14		145.94
HB	L-R_forelimbs	0.722222	0.722222		HB	L-R_hindlimbs	0.902439	0.902439		HB	RHL_homolat	0.658537	0.658537		HB	RHL_heterolat	0.414634	0.414634		0.1		0.125		0.08		0.08		0.18		0.205		5.55556		4.87805		23.9144		22.516		132.858		109.834		121.346
HB	L-R_forelimbs	0.74359	0.74359		HB	L-R_hindlimbs	0.974359	0.974359		HB	RHL_homolat	0.692308	0.692308		HB	RHL_heterolat	0.333333	0.333333		0.11		0.115		0.085		0.08		0.195		0.195		5.12821		5.12821		21.7392		21.6504		111.483		111.028		111.255
HB	L-R_forelimbs	0.72093	0.72093		HB	L-R_hindlimbs	0.923077	0.923077		HB	RHL_homolat	0.487179	0.512821		HB	RHL_heterolat	0.244444	0.244444		0.155		0.13		0.06		0.065		0.215		0.195		4.65116		5.12821		39.6368		29.478		184.357		151.169		167.763
HB	L-R_forelimbs	0.757576	0.757576		HB	L-R_hindlimbs	0.941176	0.941176		HB	RHL_homolat	0.588235	0.588235		HB	RHL_heterolat	0.282051	0.282051		0.1		0.1		0.065		0.07		0.165		0.17		6.06061		5.88235		25.5681		23.3552		154.958		137.383		146.171
HB	L-R_forelimbs	0.205882	0.794118		HB	L-R_hindlimbs	0.0606061	0.939394		HB	RHL_homolat	0.424242	0.575758		HB	RHL_heterolat	0.636364	0.363636		0.11		0.115		0.06		0.05		0.17		0.165		5.88235		6.06061		36.8612		38.6727		216.831		234.38		225.605
HB	L-R_forelimbs	0.266667	0.733333		HB	L-R_hindlimbs	0.0333333	0.966667		HB	RHL_homolat	0.466667	0.533333		HB	RHL_heterolat	0.733333	0.266667		0.09		0.1		0.06		0.05		0.15		0.15		6.66667		6.66667		23.6184		22.5309		157.456		150.206		153.831
HB	L-R_forelimbs	0.258065	0.741935		HB	L-R_hindlimbs	0.0625	0.9375		HB	RHL_homolat	0.46875	0.53125		HB	RHL_heterolat	0.71875	0.28125		0.095		0.11		0.06		0.05		0.155		0.16		6.45161		6.25		25.3103		26.0504		163.292		162.815		163.054
HB	L-R_forelimbs	0.758621	0.758621		HB	L-R_hindlimbs	0.9375	0.9375		HB	RHL_homolat	0.5625	0.5625		HB	RHL_heterolat	0.34375	0.34375		0.085		0.11		0.06		0.05		0.145		0.16		6.89655		6.25		34.9277		38.766		240.88		242.287		241.584
HB	L-R_forelimbs	0.764706	0.764706		HB	L-R_hindlimbs	0.933333	0.933333		HB	RHL_homolat	0.633333	0.633333		HB	RHL_heterolat	0.366667	0.366667		0.105		0.1		0.065		0.05		0.17		0.15		5.88235		6.66667		29.3087		24.5227		172.404		163.484		167.944
HB	L-R_forelimbs	0.785714	0.785714		HB	L-R_hindlimbs	0.96875	0.96875		HB	RHL_homolat	0.53125	0.53125		HB	RHL_heterolat	0.34375	0.34375		0.08		0.105		0.06		0.055		0.14		0.16		7.14286		6.25		23.1273		28.9529		165.195		180.956		173.075
HB	L-R_forelimbs	0.735294	0.735294		HB	L-R_hindlimbs	0.9375	0.9375		HB	RHL_homolat	0.75	0.75		HB	RHL_heterolat	0.46875	0.46875		0.1		0.095		0.07		0.065		0.17		0.16		5.88235		6.25		20.4272		21.8018		120.16		136.261		128.211
HB	L-R_forelimbs	0.216216	0.783784		HB	L-R_hindlimbs	0.0833333	0.916667		HB	RHL_homolat	0.5	0.5		HB	RHL_heterolat	0.722222	0.277778		0.1		0.12		0.085		0.06		0.185		0.18		5.40541		5.55556		25.3831		27.8866		137.206		154.926		146.066
HB	L-R_forelimbs	0.285714	0.714286		HB	L-R_hindlimbs	0.0857143	0.914286		HB	RHL_homolat	0.514286	0.514286		HB	RHL_heterolat	0.8	0.2		0.105		0.115		0.07		0.06		0.175		0.175		5.71429		5.71429		23.5909		24.2056		134.805		138.318		136.561
HB	L-R_forelimbs	0.225806	0.774194		HB	L-R_hindlimbs	0.0909091	0.909091		HB	RHL_homolat	0.424242	0.575758		HB	RHL_heterolat	0.666667	0.333333		0.11		0.125		0.05		0.04		0.16		0.165		6.25		6.06061		27.4344		38.8501		171.465		235.455		203.46
HB	L-R_forelimbs	0.268293	0.731707		HB	L-R_hindlimbs	0.0606061	0.939394		HB	RHL_homolat	0.333333	0.666667		HB	RHL_heterolat	0.666667	0.333333		0.125		0.09		0.08		0.075		0.205		0.165		4.87805		6.06061		23.0257		22.8672		112.321		138.589		125.455
HB	L-R_forelimbs	0.774194	0.774194		HB	L-R_hindlimbs	0.0263158	0.973684		HB	RHL_homolat	0.552632	0.552632		HB	RHL_heterolat	0.368421	0.368421		0.095		0.13		0.065		0.06		0.16		0.19		6.25		5.26316		22.1527		26.5036		138.454		139.493		138.974
HB	L-R_forelimbs	0.783784	0.783784		HB	L-R_hindlimbs	0.972973	0.972973		HB	RHL_homolat	0.567568	0.567568		HB	RHL_heterolat	0.405405	0.405405		0.115		0.125		0.07		0.06		0.185		0.185		5.40541		5.40541		25.2749		24.7372		136.621		133.714		135.168
HB	L-R_forelimbs	0.285714	0.714286		HB	L-R_hindlimbs	0.083333	0.916667		HB	RHL_homolat	0.305556	0.694444		HB	RHL_heterolat	0.583333	0.416667		0.125		0.125		0.05		0.055		0.175		0.18		5.71429		5.55556		38.7847		40.0171		221.627		222.317		221.972
HB	L-R_forelimbs	0.290323	0.709677		HB	L-R_hindlimbs	0.03125	0.96875		HB	RHL_homolat	0.40625	0.59375		HB	RHL_heterolat	0.6875	0.3125		0.1		0.105		0.055		0.055		0.155		0.16		6.45161		6.25		26.8278		27.0483		173.083		169.052		171.067
HB	L-R_forelimbs	0.257143	0.742857		HB	L-R_hindlimbs	0.057143	0.942857		HB	RHL_homolat	0.314286	0.685714		HB	RHL_heterolat	0.571429	0.428571		0.115		0.11		0.06		0.065		0.175		0.175		5.71429		5.71429		23.1033		24.9407		132.019		142.518		137.269
HB	L-R_forelimbs	0.264706	0.735294		HB	L-R_hindlimbs	0.057143	0.942857		HB	RHL_homolat	0.342857	0.657143		HB	RHL_heterolat	0.6	0.4		0.115		0.115		0.055		0.06		0.17		0.175		5.88235		5.71429		23.6352		25.3617		139.031		144.924		141.977
HB	L-R_forelimbs	0.235294	0.764706		HB	L-R_hindlimbs	0.030303	0.969697		HB	RHL_homolat	0.333333	0.666667		HB	RHL_heterolat	0.575758	0.424242		0.115		0.11		0.055		0.055		0.17		0.165		5.88235		6.06061		26.6311		26.0693		156.653		157.996		157.325
HB	L-R_forelimbs	0.789474	0.789474		HB	L-R_hindlimbs	0.027778	0.972222		HB	RHL_homolat	0.611111	0.611111		HB	RHL_heterolat	0.388889	0.388889		0.095		0.12		0.06		0.06		0.155		0.18		6.45161		5.55556		24.2819		27.1891		156.657		151.051		153.854
HB	L-R_forelimbs	0.775	0.775		HB	L-R_hindlimbs	0.923077	0.923077		HB	RHL_homolat	0.564103	0.564103		HB	RHL_heterolat	0.333333	0.333333		0.105		0.125		0.07		0.07		0.175		0.195		5.71429		5.12821		23.0711		25.0892		131.835		128.663		130.249
HB	L-R_forelimbs	0.711111	0.711111		HB	L-R_hindlimbs	0.948718	0.948718		HB	RHL_homolat	0.461538	0.538462		HB	RHL_heterolat	0.333333	0.333333		0.15		0.125		0.075		0.07		0.225		0.195		4.44444		5.12821		27.058		27.0845		120.258		138.895		129.576
HB	L-R_forelimbs	0.757576	0.757576		HB	L-R_hindlimbs	0.918919	0.918919		HB	RHL_homolat	0.459459	0.540541		HB	RHL_heterolat	0.243243	0.243243		0.105		0.125		0.06		0.06		0.165		0.185		6.06061		5.40541		27.0365		32.7412		163.858		176.979		170.418
HB	L-R_forelimbs	0.766667	0.766667		HB	L-R_hindlimbs	0.969697	0.969697		HB	RHL_homolat	0.612903	0.612903		HB	RHL_heterolat	0.484848	0.484848		0.085		0.105		0.06		0.05		0.145		0.155		6.89655		6.45161		27.958		28.6527		192.814		184.856		188.835
FB	L-R_forelimbs	1	1		FB	L-R_hindlimbs	1	1		FB	RHL_homolat	0.375	0.625		FB	RHL_heterolat	0.5	0.5		0.11		0.11		0.05		0.05		0.16		0.16		6.25		6.25		29.6024		29.5302		185.015		184.564		184.789
FB	L-R_forelimbs	0	1		FB	L-R_hindlimbs	0	1		FB	RHL_homolat	0.4	0.6		FB	RHL_heterolat	0.333333	0.333333		0.1		0.1		0.04		0.05		0.14		0.15		7.14286		6.66667		39.1306		36.0351		279.504		240.234		259.869
FB	L-R_forelimbs	0	1		FB	L-R_hindlimbs	0	1		FB	RHL_homolat	0.4375	0.5625		FB	RHL_heterolat	0.5	0.5		0.11		0.11		0.04		0.05		0.15		0.16		6.66667		6.25		35.0525		35.9827		233.683		224.892		229.288
FB	L-R_forelimbs	0	1		FB	L-R_hindlimbs	0	1		FB	RHL_homolat	0.4375	0.5625		FB	RHL_heterolat	0.5	0.5		0.12		0.1		0.04		0.06		0.16		0.16		6.25		6.25		31.402		30.7767		196.263		192.354		194.309
FB	L-R_forelimbs	0	1		FB	L-R_hindlimbs	0	1		FB	RHL_homolat	0.428571	0.571429		FB	RHL_heterolat	0.428571	0.428571		0.07		0.1		0.04		0.04		0.11		0.14		9.09091		7.14286		31.4197		33.0433		285.634		236.023		260.829
FB	L-R_forelimbs	0	1		FB	L-R_hindlimbs	0	1		FB	RHL_homolat	0.357143	0.642857		FB	RHL_heterolat	0.428571	0.428571		0.1		0.1		0.04		0.04		0.14		0.14		7.14286		7.14286		34.4081		33.7399		245.772		240.999		243.386
FB	L-R_forelimbs	0	1		FB	L-R_hindlimbs	0	1		FB	RHL_homolat	0.466667	0.533333		FB	RHL_heterolat	0.4	0.4		0.09		0.1		0.04		0.05		0.13		0.15		7.69231		6.66667		31.4916		32.6886		242.243		217.924		230.084
FB	L-R_forelimbs	0	1		FB	L-R_hindlimbs	0	1		FB	RHL_homolat	0.294118	0.705882		FB	RHL_heterolat	0.235294	0.235294		0.1		0.09		0.04		0.05		0.14		0.14		7.14286		7.14286		34.868		33.9464		249.057		242.474		245.766
FB	L-R_forelimbs	0	1		FB	L-R_hindlimbs	0	1		FB	RHL_homolat	0.411765	0.588235		FB	RHL_heterolat	0.411765	0.411765		0.09		0.1		0.05		0.06		0.14		0.16		7.14286		6.25		29.9583		27.2176		213.988		170.11		192.049
FB	L-R_forelimbs	0.0588235	0.941176		FB	L-R_hindlimbs	1	1		FB	RHL_homolat	0.4375	0.5625		FB	RHL_heterolat	0.6875	0.3125		0.11		0.1		0.06		0.06		0.17		0.16		5.88235		6.25		29.4154		27.2274		173.032		170.171		171.602
FB	L-R_forelimbs	0.0666667	0.933333		FB	L-R_hindlimbs	0	1		FB	RHL_homolat	0.333333	0.666667		FB	RHL_heterolat	0.2	0.2		0.11		0.1		0.04		0.05		0.15		0.15		6.66667		6.66667		31.4584		31.7541		209.722		211.694		210.708
FB	L-R_forelimbs	0.0666667	0.933333		FB	L-R_hindlimbs	0	1		FB	RHL_homolat	0.375	0.625		FB	RHL_heterolat	0.5	0.5		0.08		0.11		0.05		0.05		0.13		0.16		7.69231		6.25		22.9239		24.7363		176.338		154.602		165.47
FB	L-R_forelimbs	0.0625	0.9375		FB	L-R_hindlimbs	0	1		FB	RHL_homolat	0.411765	0.588235		FB	RHL_heterolat	0.388889	0.388889		0.09		0.1		0.05		0.06		0.14		0.16		7.14286		6.25		37.2627		33.3305		266.162		208.316		237.239
FB	L-R_forelimbs	0.0625	0.9375		FB	L-R_hindlimbs	0	1		FB	RHL_homolat	0.4375	0.5625		FB	RHL_heterolat	0.4375	0.4375		0.15		0.12		0.04		0.06		0.19		0.18		5.26316		5.55556		33.7912		33.9915		177.848		188.842		183.345
FB	L-R_forelimbs	0.0555556	0.944444		FB	L-R_hindlimbs	0	1		FB	RHL_homolat	0.470588	0.529412		FB	RHL_heterolat	0.411765	0.411765		0.09		0.1		0.05		0.06		0.14		0.16		7.14286		6.25		39.1501		37.6704		279.643		235.44		257.542
FB	L-R_forelimbs	0.1	0.9		FB	L-R_hindlimbs	0	1		FB	RHL_homolat	0.1875	0.8125		FB	RHL_heterolat	0.3125	0.3125		0.15		0.11		0.05		0.05		0.2		0.16		5		6.25		25.2019		29.0775		126.01		181.734		153.872
FB	L-R_forelimbs	0.1	0.9		FB	L-R_hindlimbs	0	1		FB	RHL_homolat	0.375	0.625		FB	RHL_heterolat	0.3125	0.3125		0.1		0.12		0.03		0.04		0.13		0.16		7.69231		6.25		31.6412		36.8565		243.394		230.353		236.874
FB	L-R_forelimbs	0.0714286	0.928571		FB	L-R_hindlimbs	0	1		FB	RHL_homolat	0.384615	0.615385		FB	RHL_heterolat	0.461538	0.461538		0.11		0.09		0.03		0.04		0.14		0.13		7.14286		7.69231		33.495		36.1675		239.25		278.211		258.731
FB	L-R_forelimbs	0.0833333	0.916667		FB	L-R_hindlimbs	0	1		FB	RHL_homolat	0.307692	0.692308		FB	RHL_heterolat	0.461538	0.461538		0.08		0.1		0.04		0.03		0.12		0.13		8.33333		7.69231		36.6687		35.284		305.572		271.415		288.494
FB	L-R_forelimbs	0.0833333	0.916667		FB	L-R_hindlimbs	0	1		FB	RHL_homolat	0.416667	0.583333		FB	RHL_heterolat	0.416667	0.416667		0.09		0.09		0.03		0.03		0.12		0.12		8.33333		8.33333		33.403		25.5112		278.358		212.593		245.476
FB	L-R_forelimbs	0.0714286	0.928571		FB	L-R_hindlimbs	0	1		FB	RHL_homolat	0.357143	0.642857		FB	RHL_heterolat	0.357143	0.357143		0.1		0.1		0.04		0.04		0.14		0.14		7.14286		7.14286		35.017		32.5536		250.122		232.526		241.324
FB	L-R_forelimbs	0.0625	0.9375		FB	L-R_hindlimbs	0	1		FB	RHL_homolat	0.4375	0.5625		FB	RHL_heterolat	0.5	0.5		0.11		0.11		0.05		0.05		0.16		0.16		6.25		6.25		31.1584		33.2841		194.74		208.026		201.383
FB	L-R_forelimbs	0.0714286	0.928571		FB	L-R_hindlimbs	0	1		FB	RHL_homolat	0.357143	0.642857		FB	RHL_heterolat	0.428571	0.428571		0.12		0.12		0.03		0.05		0.15		0.17		6.66667		5.88235		31.1575		36.1797		207.717		212.822		210.269
FB	L-R_forelimbs	0.0714286	0.928571		FB	L-R_hindlimbs	0	1		FB	RHL_homolat	0.411765	0.588235		FB	RHL_heterolat	0.411765	0.411765		0.1		0.1		0.03		0.04		0.13		0.14		7.69231		7.14286		30.933		31.9125		237.946		227.946		232.946
FB	L-R_forelimbs	0.0714286	0.928571		FB	L-R_hindlimbs	0	1		FB	RHL_homolat	0.333333	0.666667		FB	RHL_heterolat	0.266667	0.266667		0.1		0.11		0.04		0.04		0.14		0.15		7.14286		6.66667		31.7901		32.1686		227.072		214.458		220.765
FB	L-R_forelimbs	0.0714286	0.928571		FB	L-R_hindlimbs	0	1		FB	RHL_homolat	0.428571	0.571429		FB	RHL_heterolat	0.5	0.5		0.11		0.11		0.05		0.06		0.16		0.17		6.25		5.88235		32.949		31.2529		205.931		183.841		194.886
FB	L-R_forelimbs	0.923077	0.923077		FB	L-R_hindlimbs	1	1		FB	RHL_homolat	0.351351	0.648649		FB	RHL_heterolat	0.27027	0.27027		0.135		0.12		0.06		0.065		0.195		0.185		5.12821		5.40541		27.5441		28.9514		141.252		156.494		148.873
FB	L-R_forelimbs	0.90625	0.90625		FB	L-R_hindlimbs	1	1		FB	RHL_homolat	0.441176	0.558824		FB	RHL_heterolat	0.323529	0.323529		0.105		0.11		0.055		0.06		0.16		0.17		6.25		5.88235		27.6515		28.8979		172.822		169.988		171.405
FB	L-R_forelimbs	0.90625	0.90625		FB	L-R_hindlimbs	1	1		FB	RHL_homolat	0.5	0.5		FB	RHL_heterolat	0.416667	0.416667		0.105		0.105		0.055		0.075		0.16		0.18		6.25		5.55556		19.8419		20.2806		124.012		112.67		118.341
FB	L-R_forelimbs	0.90566	0.90566		FB	L-R_hindlimbs	1	1		FB	RHL_homolat	0.319149	0.680851		FB	RHL_heterolat	0.234043	0.234043		0.185		0.15		0.08		0.085		0.265		0.235		3.77358		4.25532		39.8316		39.8995		150.308		169.785		160.047
FB	L-R_forelimbs	0.947368	0.947368		FB	L-R_hindlimbs	1	1		FB	RHL_homolat	0.441176	0.558824		FB	RHL_heterolat	0.382353	0.382353		0.08		0.1		0.06		0.07		0.14		0.17		7.14286		5.88235		22.7735		27.0624		162.668		159.191		160.929
FB	L-R_forelimbs	0.0263158	0.973684		FB	L-R_hindlimbs	1	1		FB	RHL_homolat	0.361111	0.638889		FB	RHL_heterolat	0.388889	0.388889		0.125		0.11		0.065		0.07		0.19		0.18		5.26316		5.55556		28.1871		27.9271		148.353		155.15		151.752
FB	L-R_forelimbs	0.909091	0.909091		FB	L-R_hindlimbs	1	1		FB	RHL_homolat	0.432432	0.567568		FB	RHL_heterolat	0.351351	0.351351		0.115		0.12		0.055		0.065		0.17		0.185		5.88235		5.40541		29.1576		31.5756		171.515		170.679		171.097
FB	L-R_forelimbs	0.0769231	0.923077		FB	L-R_hindlimbs	1	1		FB	RHL_homolat	0.333333	0.666667		FB	RHL_heterolat	0.416667	0.416667		0.12		0.12		0.065		0.08		0.185		0.2		5.40541		5		25.3694		25.5164		137.132		127.582		132.357
FB	L-R_forelimbs	0.0967742	0.903226		FB	L-R_hindlimbs	0	1		FB	RHL_homolat	0.354839	0.645161		FB	RHL_heterolat	0.258065	0.258065		0.105		0.11		0.035		0.045		0.14		0.155		7.14286		6.45161		32.9295		45.2651		235.211		292.033		263.622
FB	L-R_forelimbs	0.0740741	0.925926		FB	L-R_hindlimbs	0	1		FB	RHL_homolat	0.354839	0.645161		FB	RHL_heterolat	0.290323	0.290323		0.125		0.11		0.03		0.045		0.155		0.155		6.45161		6.45161		44.5229		37.9164		287.245		244.622		265.933
FB	L-R_forelimbs	0.027027	0.972973		FB	L-R_hindlimbs	0	1		FB	RHL_homolat	0.285714	0.714286		FB	RHL_heterolat	0.222222	0.222222		0.12		0.13		0.035		0.05		0.155		0.18		6.45161		5.55556		47.2877		43.9605		305.082		244.225		274.653
FB	L-R_forelimbs	0.0645161	0.935484		FB	L-R_hindlimbs	0	1		FB	RHL_homolat	0.194444	0.805556		FB	RHL_heterolat	0.3125	0.3125		0.095		0.12		0.03		0.04		0.125		0.16		8		6.25		30.9673		48.7986		247.738		304.991		276.365
FB	L-R_forelimbs	0.0740741	0.925926		FB	L-R_hindlimbs	0	1		FB	RHL_homolat	0.162162	0.837838		FB	RHL_heterolat	0.216216	0.216216		0.11		0.11		0.035		0.045		0.145		0.155		6.89655		6.45161		41.4218		44.2044		285.668		285.19		285.429
FB	L-R_forelimbs	0.0512821	0.948718		FB	L-R_hindlimbs	0	1		FB	RHL_homolat	0.258065	0.741935		FB	RHL_heterolat	0.290323	0.290323		0.09		0.11		0.035		0.04		0.125		0.15		8		6.66667		31.2005		36.2078		249.604		241.385		245.494
FB	L-R_forelimbs	0.0344828	0.965517		FB	L-R_hindlimbs	0	1		FB	RHL_homolat	0.433333	0.566667		FB	RHL_heterolat	0.333333	0.333333		0.11		0.105		0.04		0.045		0.15		0.15		6.66667		6.66667		30.4069		28.7049		202.713		191.366		197.039
FB	L-R_forelimbs	0.0666667	0.933333		FB	L-R_hindlimbs	0	1		FB	RHL_homolat	0.3	0.7		FB	RHL_heterolat	0.366667	0.366667		0.085		0.1		0.045		0.05		0.13		0.15		7.69231		6.66667		28.0779		29.2737		215.983		195.158		205.571
FB	L-R_forelimbs	0.1	0.9		FB	L-R_hindlimbs	0	1		FB	RHL_homolat	0.342857	0.657143		FB	RHL_heterolat	0.40625	0.40625		0.145		0.12		0.055		0.055		0.2		0.175		5		5.71429		32.1424		29.7686		160.712		170.106		165.409
FB	L-R_forelimbs	0.0666667	0.933333		FB	L-R_hindlimbs	1	1		FB	RHL_homolat	0.419355	0.580645		FB	RHL_heterolat	0.483871	0.483871		0.1		0.105		0.05		0.05		0.15		0.155		6.66667		6.45161		30.5658		29.3892		203.772		189.608		196.69
FB	L-R_forelimbs	0.935484	0.935484		FB	L-R_hindlimbs	1	1		FB	RHL_homolat	0.289474	0.710526		FB	RHL_heterolat	0.272727	0.272727		0.115		0.135		0.05		0.055		0.165		0.19		6.06061		5.26316		44.2976		36.3956		268.47		191.556		230.013
FB	L-R_forelimbs	0.972973	0.972973		FB	L-R_hindlimbs	1	1		FB	RHL_homolat	0.342857	0.657143		FB	RHL_heterolat	0.485714	0.485714		0.125		0.115		0.06		0.06		0.185		0.175		5.40541		5.71429		27.7543		26.9541		150.023		154.023		152.023
FB	L-R_forelimbs	0.0243902	0.97561		FB	L-R_hindlimbs	1	1		FB	RHL_homolat	0.243243	0.756757		FB	RHL_heterolat	0.189189	0.189189		0.14		0.145		0.045		0.04		0.185		0.185		5.40541		5.40541		50.2679		51.508		271.719		278.421		275.07
FB	L-R_forelimbs	0.928571	0.928571		FB	L-R_hindlimbs	1	1		FB	RHL_homolat	0.424242	0.575758		FB	RHL_heterolat	0.333333	0.333333		0.095		0.12		0.045		0.045		0.14		0.165		7.14286		6.06061		31.7229		35.2951		226.592		213.91		220.251
FB	L-R_forelimbs	0	1		FB	L-R_hindlimbs	0.0588235	0.941176		FB	RHL_homolat	0.352941	0.647059		FB	RHL_heterolat	0.294118	0.294118		0.1		0.09		0.06		0.08		0.16		0.17		6.25		5.88235		32.8718		26.9887		205.449		158.757		182.103
FB	L-R_forelimbs	0	1		FB	L-R_hindlimbs	0.0666667	0.933333		FB	RHL_homolat	0.2	0.8		FB	RHL_heterolat	0.333333	0.333333		0.12		0.11		0.04		0.04		0.16		0.15		6.25		6.66667		39.8231		39.3928		248.895		262.619		255.757
FB	L-R_forelimbs	0	1		FB	L-R_hindlimbs	0.0588235	0.941176		FB	RHL_homolat	0.428571	0.571429		FB	RHL_heterolat	0.5	0.5		0.08		0.11		0.06		0.05		0.14		0.16		7.14286		6.25		33.9291		29.5485		242.351		184.678		213.514
FB	L-R_forelimbs	0	1		FB	L-R_hindlimbs	0.0357143	0.964286		FB	RHL_homolat	0.392857	0.607143		FB	RHL_heterolat	0.466667	0.466667		0.07		0.11		0.045		0.04		0.115		0.15		8.69565		6.66667		22.9041		32.1733		199.166		214.489		206.828
FB	L-R_forelimbs	0.0625	0.9375		FB	L-R_hindlimbs	0.0666667	0.933333		FB	RHL_homolat	0.333333	0.666667		FB	RHL_heterolat	0.4	0.4		0.09		0.09		0.07		0.06		0.16		0.15		6.25		6.66667		24.2964		31.5977		151.852		210.651		181.252
FB	L-R_forelimbs	0.0526316	0.947368		FB	L-R_hindlimbs	0.0625	0.9375		FB	RHL_homolat	0.388889	0.611111		FB	RHL_heterolat	0.333333	0.333333		0.1		0.1		0.05		0.06		0.15		0.16		6.66667		6.25		28.3386		29.1876		188.924		182.423		185.673
FB	L-R_forelimbs	0.0588235	0.941176		FB	L-R_hindlimbs	0.0588235	0.941176		FB	RHL_homolat	0.375	0.625		FB	RHL_heterolat	0.375	0.375		0.1		0.1		0.04		0.06		0.14		0.16		7.14286		6.25		41.0293		33.6352		293.066		210.22		251.643
FB	L-R_forelimbs	0.05	0.95		FB	L-R_hindlimbs	0.05	0.95		FB	RHL_homolat	0.4	0.6		FB	RHL_heterolat	0.45	0.45		0.12		0.09		0.07		0.08		0.19		0.17		5.26316		5.88235		27.4975		41.6973		144.724		245.278		195.001
FB	L-R_forelimbs	0.0625	0.9375		FB	L-R_hindlimbs	0.0625	0.9375		FB	RHL_homolat	0.4375	0.5625		FB	RHL_heterolat	0.3125	0.3125		0.09		0.11		0.05		0.05		0.14		0.16		7.14286		6.25		28.7606		28.6958		205.433		179.349		192.391
FB	L-R_forelimbs	0.0714286	0.928571		FB	L-R_hindlimbs	0.0666667	0.933333		FB	RHL_homolat	0.4	0.6		FB	RHL_heterolat	0.466667	0.466667		0.1		0.09		0.04		0.05		0.14		0.14		7.14286		7.14286		31.7521		30.8534		226.801		220.381		223.591
FB	L-R_forelimbs	0.0526316	0.947368		FB	L-R_hindlimbs	0.0555556	0.944444		FB	RHL_homolat	0.411765	0.588235		FB	RHL_heterolat	0.470588	0.470588		0.11		0.11		0.06		0.06		0.17		0.17		5.88235		5.88235		27.4617		29.284		161.54		172.259		166.899
FB	L-R_forelimbs	0.945946	0.945946		FB	L-R_hindlimbs	0.0555556	0.944444		FB	RHL_homolat	0.416667	0.583333		FB	RHL_heterolat	0.333333	0.333333		0.115		0.11		0.07		0.07		0.185		0.18		5.40541		5.55556		22.6052		22.9483		122.19		127.49		124.84
FB	L-R_forelimbs	0.916667	0.916667		FB	L-R_hindlimbs	0.974359	0.974359		FB	RHL_homolat	0.538462	0.538462		FB	RHL_heterolat	0.410256	0.410256		0.11		0.115		0.07		0.08		0.18		0.195		5.55556		5.12821		20.8739		20.9321		115.966		107.344		111.655
FB	L-R_forelimbs	0.0810811	0.918919		FB	L-R_hindlimbs	0.0277778	0.972222		FB	RHL_homolat	0.222222	0.777778		FB	RHL_heterolat	0.305556	0.305556		0.13		0.115		0.055		0.065		0.185		0.18		5.40541		5.55556		35.2127		36.4935		190.339		202.741		196.54
FB	L-R_forelimbs	0.08	0.92		FB	L-R_hindlimbs	0.0333333	0.966667		FB	RHL_homolat	0.448276	0.551724		FB	RHL_heterolat	0.37931	0.37931		0.1		0.1		0.035		0.045		0.135		0.145		7.40741		6.89655		31.322		30.4912		232.015		210.284		221.15
FB	L-R_forelimbs	0.0740741	0.925926		FB	L-R_hindlimbs	0.0625	0.9375		FB	RHL_homolat	0.25	0.75		FB	RHL_heterolat	0.321429	0.321429		0.095		0.105		0.04		0.035		0.135		0.14		7.40741		7.14286		31.7253		35.0263		235.002		250.188		242.595
FB	L-R_forelimbs	0.1	0.9		FB	L-R_hindlimbs	0.0333333	0.966667		FB	RHL_homolat	0.433333	0.566667		FB	RHL_heterolat	0.5	0.5		0.08		0.09		0.045		0.05		0.125		0.14		8		7.14286		25.235		22.5317		201.88		160.941		181.41
FB	L-R_forelimbs	0.0645161	0.935484		FB	L-R_hindlimbs	0.030303	0.969697		FB	RHL_homolat	0.424242	0.575758		FB	RHL_heterolat	0.333333	0.333333		0.095		0.1		0.05		0.06		0.145		0.16		6.89655		6.25		23.3021		22.2291		160.704		138.932		149.818
FB	L-R_forelimbs	0.0882353	0.911765		FB	L-R_hindlimbs	0.0294118	0.970588		FB	RHL_homolat	0.382353	0.617647		FB	RHL_heterolat	0.470588	0.470588		0.11		0.115		0.06		0.055		0.17		0.17		5.88235		5.88235		26.7378		28.6675		157.281		168.632		162.957
FB	L-R_forelimbs	0.0967742	0.903226		FB	L-R_hindlimbs	0.0285714	0.971429		FB	RHL_homolat	0.441176	0.558824		FB	RHL_heterolat	0.457143	0.457143		0.095		0.105		0.06		0.065		0.155		0.17		6.45161		5.88235		22.5427		20.0896		145.437		118.174		131.806
FB	L-R_forelimbs	0.0333333	0.966667		FB	L-R_hindlimbs	0.966667	0.966667		FB	RHL_homolat	0.4	0.6		FB	RHL_heterolat	0.433333	0.433333		0.1		0.095		0.05		0.055		0.15		0.15		6.66667		6.66667		39.473		39.8632		263.153		265.755		264.454
FB	L-R_forelimbs	0.909091	0.909091		FB	L-R_hindlimbs	0.969697	0.969697		FB	RHL_homolat	0.34375	0.65625		FB	RHL_heterolat	0.40625	0.40625		0.115		0.115		0.05		0.045		0.165		0.16		6.06061		6.25		42.5376		42.414		257.804		265.088		261.446
FB	L-R_forelimbs	0.0606061	0.939394		FB	L-R_hindlimbs	0.030303	0.969697		FB	RHL_homolat	0.454545	0.545455		FB	RHL_heterolat	0.575758	0.424242		0.095		0.11		0.05		0.055		0.145		0.165		6.89655		6.06061		31.2086		31.1036		215.232		188.507		201.869
FB	L-R_forelimbs	0.05	0.95		FB	L-R_hindlimbs	0.0526316	0.947368		FB	RHL_homolat	0.421053	0.578947		FB	RHL_heterolat	0.473684	0.473684		0.14		0.13		0.06		0.06		0.2		0.19		5		5.26316		27.209		26.0596		136.045		137.156		136.6
FB	L-R_forelimbs	0.90625	0.90625		FB	L-R_hindlimbs	0.0238095	0.97619		FB	RHL_homolat	0.357143	0.642857		FB	RHL_heterolat	0.285714	0.285714		0.14		0.125		0.075		0.085		0.215		0.21		4.65116		4.7619		20.0468		21.6826		93.241		103.251		98.2458
FB	L-R_forelimbs	0.9	0.9		FB	L-R_hindlimbs	0.0526316	0.947368		FB	RHL_homolat	0.333333	0.666667		FB	RHL_heterolat	0.433333	0.433333		0.135		0.1		0.065		0.05		0.2		0.15		5		6.66667		30.753		27.0049		153.765		180.033		166.899
FB	L-R_forelimbs	0.075	0.925		FB	L-R_hindlimbs	0.947368	0.947368		FB	RHL_homolat	0.394737	0.605263		FB	RHL_heterolat	0.368421	0.368421		0.11		0.135		0.055		0.055		0.165		0.19		6.06061		5.26316		25.3333		30.5332		153.535		160.701		157.118
FB	L-R_forelimbs	0.069767	0.930233		FB	L-R_hindlimbs	0.972973	0.972973		FB	RHL_homolat	0.324324	0.675676		FB	RHL_heterolat	0.540541	0.459459		0.12		0.12		0.06		0.065		0.18		0.185		5.55556		5.40541		27.317		26.6375		151.761		143.986		147.874
FB	L-R_forelimbs	0.909091	0.909091		FB	L-R_hindlimbs	0.03125	0.96875		FB	RHL_homolat	0.375	0.625		FB	RHL_heterolat	0.210526	0.210526		0.135		0.105		0.06		0.055		0.195		0.16		5.12821		6.25		35.0835		23.5829		179.915		147.393		163.654
FB	L-R_forelimbs	0.941176	0.941176		FB	L-R_hindlimbs	0.947368	0.947368		FB	RHL_homolat	0.513514	0.513514		FB	RHL_heterolat	0.378378	0.378378		0.105		0.11		0.065		0.075		0.17		0.185		5.88235		5.40541		21.8509		23.5139		128.535		127.102		127.818
FB	L-R_forelimbs	0.0833333	0.916667		FB	L-R_hindlimbs	0.0606061	0.939394		FB	RHL_homolat	0.424242	0.575758		FB	RHL_heterolat	0.333333	0.333333		0.1		0.12		0.05		0.045		0.15		0.165		6.66667		6.06061		29.4106		32.1941		196.071		195.116		195.593
FB	L-R_forelimbs	0.916667	0.916667		FB	L-R_hindlimbs	0.0857143	0.914286		FB	RHL_homolat	0.371429	0.628571		FB	RHL_heterolat	0.485714	0.485714		0.13		0.12		0.05		0.055		0.18		0.175		5.55556		5.71429		29.2572		26.4216		162.54		150.981		156.76
FB	L-R_forelimbs	0.903226	0.903226		FB	L-R_hindlimbs	0.0322581	0.967742		FB	RHL_homolat	0.451613	0.548387		FB	RHL_heterolat	0.580645	0.419355		0.105		0.1		0.05		0.055		0.155		0.155		6.45161		6.45161		26.7192		24.8473		172.382		160.305		166.344

## Sheet: Spatiotemp_gait
Gait_ID	Limb_ID	rawPhase	transPhase	ref_r-FL_swingTime(s)	ref_r-FL_stanceTime(s)	ref_r-FL_strideTime(s)	ref_r-FL_strideFreq(Hz)	ref_r-FL_strideDist(cm)	ref_r-FL_instSpd(cm/s)		Gait_ID	Limb_ID	rawPhase	transPhase	ref_r-HL_swingTime(s)	ref_r-HL_stanceTime(s)	ref_r-HL_strideTime(s)	ref_r-HL_strideFreq(Hz)	ref_r-HL_strideDist(cm)	ref_r-HL_instSpd(cm/s)
W-T	L-R_forelimbs	0.5	0.5	0.13	0.13	0.26	3.84615	16.8931	64.9736		W-T	L-R_hindlimbs	0.5	0.5	0.12	0.12	0.24	4.16667	16.9177	70.4903
W-T	L-R_forelimbs	0.5	0.5	0.12	0.12	0.24	4.16667	13.8549	57.729		W-T	L-R_hindlimbs	0.5	0.5	0.15	0.17	0.32	3.125	19.4785	60.8704
W-T	L-R_forelimbs	0.5	0.5	0.16	0.16	0.32	3.125	15.7558	49.2367		W-T	L-R_hindlimbs	0.5	0.5	0.15	0.15	0.3	3.33333	16.4046	54.6821
W-T	L-R_forelimbs	0.5	0.5	0.15	0.15	0.3	3.33333	18.8325	62.775		W-T	L-R_hindlimbs	0.5	0.5	0.15	0.13	0.28	3.57143	19.1482	68.3865
W-T	L-R_forelimbs	0.5	0.5	0.13	0.18	0.31	3.22581	14.3654	46.34		W-T	L-R_hindlimbs	0.5	0.5	0.15	0.15	0.3	3.33333	16.7053	55.6844
W-T	L-R_forelimbs	0.5	0.5	0.12	0.1	0.22	4.54545	24.3131	110.514		W-T	L-R_hindlimbs	0.5	0.5	0.13	0.09	0.22	4.54545	23.9115	108.688
W-T	L-R_forelimbs	0.5	0.5	0.15	0.09	0.24	4.16667	25.4517	106.049		W-T	L-R_hindlimbs	0.5	0.5	0.14	0.1	0.24	4.16667	25.514	106.308
W-T	L-R_forelimbs	0.5	0.5	0.13	0.08	0.21	4.7619	28.1262	133.934		W-T	L-R_hindlimbs	0.5	0.5	0.12	0.08	0.2	5	29.3229	146.614
W-T	L-R_forelimbs	0.5	0.5	0.105	0.085	0.19	5.26316	22.2676	117.198		W-T	L-R_hindlimbs	0.5	0.5	0.115	0.075	0.19	5.26316	23.6855	124.66
W-T	L-R_forelimbs	0.5	0.5	0.14	0.14	0.28	3.57143	17.7553	63.4119		W-T	L-R_hindlimbs	0.5	0.5	0.135	0.115	0.25	4	17.1542	68.6169
W-T	L-R_forelimbs	0.52	0.52	0.11	0.14	0.25	4	17.33	69.32		W-T	L-R_hindlimbs	0.5	0.5	0.12	0.11	0.23	4.34783	16.4454	71.5018
W-T	L-R_forelimbs	0.484848	0.515152	0.15	0.18	0.33	3.0303	17.3911	52.7002		W-T	L-R_hindlimbs	0.5	0.5	0.17	0.17	0.34	2.94118	17.7004	52.0601
W-T	L-R_forelimbs	0.482759	0.517241	0.15	0.14	0.29	3.44828	18.1682	62.649		W-T	L-R_hindlimbs	0.5	0.5	0.16	0.14	0.3	3.33333	18.1204	60.4014
W-T	L-R_forelimbs	0.461538	0.538462	0.12	0.14	0.26	3.84615	15.4944	59.5939		W-T	L-R_hindlimbs	0.5	0.5	0.16	0.12	0.28	3.57143	18.971	67.7535
W-T	L-R_forelimbs	0.45	0.55	0.11	0.09	0.2	5	22.2422	111.211		W-T	L-R_hindlimbs	0.5	0.5	0.11	0.09	0.2	5	21.5213	107.607
W-T	L-R_forelimbs	0.478261	0.521739	0.14	0.1	0.24	4.16667	24.1005	100.419		W-T	L-R_hindlimbs	0.5	0.5	0.15	0.09	0.24	4.16667	23.6568	98.57
W-T	L-R_forelimbs	0.521739	0.521739	0.14	0.09	0.23	4.34783	23.6387	102.777		W-T	L-R_hindlimbs	0.5	0.5	0.13	0.09	0.22	4.54545	24.104	109.564
W-T	L-R_forelimbs	0.46875	0.53125	0.13	0.19	0.32	3.125	16.3906	51.2207		W-T	L-R_hindlimbs	0.5	0.5	0.13	0.17	0.3	3.33333	14.4719	48.2398
W-T	L-R_forelimbs	0.451613	0.548387	0.14	0.17	0.31	3.22581	17.1802	55.4199		W-T	L-R_hindlimbs	0.5	0.5	0.13	0.17	0.3	3.33333	12.7743	42.5809
W-T	L-R_forelimbs	0.473684	0.526316	0.115	0.075	0.19	5.26316	21.9053	115.291		W-T	L-R_hindlimbs	0.5	0.5	0.12	0.07	0.19	5.26316	22.5266	118.561
W-T	L-R_forelimbs	0.490909	0.509091	0.13	0.145	0.275	3.63636	22.2738	80.9956		W-T	L-R_hindlimbs	0.5	0.5	0.145	0.105	0.25	4	22.8698	91.4791
W-T	L-R_forelimbs	0.466667	0.533333	0.125	0.1	0.225	4.44444	21.5803	95.9123		W-T	L-R_hindlimbs	0.5	0.5	0.145	0.095	0.24	4.16667	22.1457	92.2737
W-T	L-R_forelimbs	0.461538	0.538462	0.115	0.08	0.195	5.12821	24.5834	126.069		W-T	L-R_hindlimbs	0.5	0.5	0.125	0.065	0.19	5.26316	25.1108	132.162
W-T	L-R_forelimbs	0.510638	0.510638	0.14	0.095	0.235	4.25532	19.8672	84.5411		W-T	L-R_hindlimbs	0.5	0.5	0.15	0.1	0.25	4	20.8336	83.3343
W-T	L-R_forelimbs	0.54386	0.54386	0.125	0.16	0.285	3.50877	24.5879	86.2734		W-T	L-R_hindlimbs	0.5	0.5	0.175	0.095	0.27	3.7037	16.97	62.8519
W-T	L-R_forelimbs	0.477273	0.522727	0.13	0.1	0.23	4.34783	31.6883	137.775		W-T	L-R_hindlimbs	0.5	0.5	0.145	0.075	0.22	4.54545	21.0139	95.5179
W-T	L-R_forelimbs	0.536585	0.536585	0.105	0.095	0.2	5	20.1208	100.604		W-T	L-R_hindlimbs	0.5	0.5	0.155	0.06	0.215	4.65116	26.6114	123.774
W-T	L-R_forelimbs	0.5	0.5	0.11	0.14	0.25	4	15.3959	61.5834		W-T	L-R_hindlimbs	0.461538	0.538462	0.12	0.14	0.26	3.84615	16.557	63.6809
W-T	L-R_forelimbs	0.5	0.5	0.11	0.17	0.28	3.57143	13.7484	49.1015		W-T	L-R_hindlimbs	0.541667	0.541667	0.13	0.11	0.24	4.16667	12.0531	50.2212
W-T	L-R_forelimbs	0.5	0.5	0.13	0.15	0.28	3.57143	16.7906	59.9664		W-T	L-R_hindlimbs	0.533333	0.533333	0.15	0.15	0.3	3.33333	17.5978	58.6595
W-T	L-R_forelimbs	0.5	0.5	0.11	0.15	0.26	3.84615	14.504	55.7846		W-T	L-R_hindlimbs	0.52	0.52	0.13	0.12	0.25	4	16.1064	64.4257
W-T	L-R_forelimbs	0.5	0.5	0.14	0.1	0.24	4.16667	18.008	75.0334		W-T	L-R_hindlimbs	0.481481	0.518519	0.13	0.16	0.29	3.44828	15.4849	53.3962
W-T	L-R_forelimbs	0.5	0.5	0.19	0.24	0.43	2.32558	15.8242	36.8006		W-T	L-R_hindlimbs	0.529412	0.529412	0.13	0.21	0.34	2.94118	12.9357	38.0461
W-T	L-R_forelimbs	0.5	0.5	0.13	0.14	0.27	3.7037	15.8224	58.6016		W-T	L-R_hindlimbs	0.541667	0.541667	0.13	0.11	0.24	4.16667	19.8879	82.8662
W-T	L-R_forelimbs	0.5	0.5	0.15	0.19	0.34	2.94118	16.4439	48.3644		W-T	L-R_hindlimbs	0.483871	0.516129	0.15	0.16	0.31	3.22581	16.7599	54.0641
W-T	L-R_forelimbs	0.5	0.5	0.13	0.09	0.22	4.54545	20.3387	92.4485		W-T	L-R_hindlimbs	0.481481	0.518519	0.15	0.12	0.27	3.7037	19.7133	73.0122
W-T	L-R_forelimbs	0.5	0.5	0.11	0.09	0.2	5	22.8676	114.338		W-T	L-R_hindlimbs	0.55	0.55	0.11	0.09	0.2	5	21.1032	105.516
W-T	L-R_forelimbs	0.5	0.5	0.13	0.11	0.24	4.16667	21.0915	87.8813		W-T	L-R_hindlimbs	0.478261	0.521739	0.11	0.12	0.23	4.34783	17.7022	76.9662
W-T	L-R_forelimbs	0.5	0.5	0.11	0.11	0.22	4.54545	19.3495	87.9522		W-T	L-R_hindlimbs	0.541667	0.541667	0.13	0.11	0.24	4.16667	21.2099	88.3746
W-T	L-R_forelimbs	0.5	0.5	0.13	0.09	0.22	4.54545	25.244	114.745		W-T	L-R_hindlimbs	0.52381	0.52381	0.14	0.07	0.21	4.7619	25.4956	121.408
W-T	L-R_forelimbs	0.5	0.5	0.12	0.08	0.2	5	24.4373	122.186		W-T	L-R_hindlimbs	0.473684	0.526316	0.12	0.07	0.19	5.26316	23.6517	124.483
W-T	L-R_forelimbs	0.5	0.5	0.15	0.11	0.26	3.84615	17.6873	68.0279		W-T	L-R_hindlimbs	0.538462	0.538462	0.17	0.14	0.31	3.22581	20.9237	67.4958
W-T	L-R_forelimbs	0.5	0.5	0.13	0.1	0.23	4.34783	20.749	90.2132		W-T	L-R_hindlimbs	0.489796	0.510204	0.14	0.105	0.245	4.08163	22.72	92.7347
W-T	L-R_forelimbs	0.5	0.5	0.115	0.085	0.2	5	18.9669	94.8343		W-T	L-R_hindlimbs	0.463415	0.536585	0.13	0.075	0.205	4.87805	17.97	87.6587
W-T	L-R_forelimbs	0.5	0.5	0.12	0.07	0.19	5.26316	21.498	113.148		W-T	L-R_hindlimbs	0.55	0.55	0.13	0.07	0.2	5	23.0344	115.172
W-T	L-R_forelimbs	0.5	0.5	0.115	0.075	0.19	5.26316	33.127	174.353		W-T	L-R_hindlimbs	0.473684	0.526316	0.12	0.07	0.19	5.26316	32.9288	173.309
W-T	L-R_forelimbs	0.5	0.5	0.155	0.125	0.28	3.57143	19.6636	70.227		W-T	L-R_hindlimbs	0.538462	0.538462	0.14	0.12	0.26	3.84615	18.4319	70.892
W-T	L-R_forelimbs	0.5	0.5	0.145	0.115	0.26	3.84615	31.0231	119.32		W-T	L-R_hindlimbs	0.529412	0.529412	0.16	0.095	0.255	3.92157	32.1869	126.223
W-T	L-R_forelimbs	0.5	0.5	0.105	0.095	0.2	5	19.2138	96.0691		W-T	L-R_hindlimbs	0.477273	0.522727	0.14	0.08	0.22	4.54545	24.1379	109.718
W-T	L-R_forelimbs	0.5	0.5	0.125	0.145	0.27	3.7037	18.3027	67.7876		W-T	L-R_hindlimbs	0.510638	0.510638	0.13	0.105	0.235	4.25532	16.4874	70.159
W-T	L-R_forelimbs	0.5	0.5	0.12	0.1	0.22	4.54545	22.999	104.541		W-T	L-R_hindlimbs	0.521739	0.521739	0.15	0.08	0.23	4.34783	21.5731	93.7959
W-T	L-R_forelimbs	0.5	0.5	0.125	0.105	0.23	4.34783	20.8522	90.6615		W-T	L-R_hindlimbs	0.489362	0.510638	0.13	0.105	0.235	4.25532	17.4399	74.2124
W-T	L-R_forelimbs	0.5	0.5	0.12	0.1	0.22	4.54545	20.6938	94.0629		W-T	L-R_hindlimbs	0.511111	0.511111	0.14	0.08	0.22	4.54545	21.7951	99.0688
W-T	L-R_forelimbs	0.5	0.5	0.125	0.08	0.205	4.87805	26.3749	128.658		W-T	L-R_hindlimbs	0.526316	0.526316	0.145	0.075	0.22	4.54545	22.0674	100.306
W-T	L-R_forelimbs	0.53125	0.53125	0.15	0.1	0.25	4	17.9761	71.9043		W-T	L-R_hindlimbs	0.482759	0.517241	0.14	0.15	0.29	3.44828	15.3674	52.9911
W-T	L-R_forelimbs	0.52381	0.52381	0.12	0.09	0.21	4.7619	19.7229	93.9185		W-T	L-R_hindlimbs	0.545455	0.545455	0.12	0.1	0.22	4.54545	19.988	90.8543
W-T	L-R_forelimbs	0.47619	0.52381	0.09	0.12	0.21	4.7619	12.9872	61.844		W-T	L-R_hindlimbs	0.458333	0.541667	0.12	0.12	0.24	4.16667	17.254	71.8915
W-T	L-R_forelimbs	0.517241	0.517241	0.15	0.14	0.29	3.44828	17.0032	58.6317		W-T	L-R_hindlimbs	0.533333	0.533333	0.14	0.16	0.3	3.33333	17.4035	58.0116
W-T	L-R_forelimbs	0.483871	0.516129	0.13	0.18	0.31	3.22581	16.5439	53.3675		W-T	L-R_hindlimbs	0.464286	0.535714	0.12	0.16	0.28	3.57143	14.5831	52.0825
W-T	L-R_forelimbs	0.483871	0.516129	0.12	0.19	0.31	3.22581	12.2954	39.6624		W-T	L-R_hindlimbs	0.46875	0.53125	0.13	0.19	0.32	3.125	13.8279	43.2123
W-T	L-R_forelimbs	0.533333	0.533333	0.15	0.15	0.3	3.33333	18.4328	61.4428		W-T	L-R_hindlimbs	0.535714	0.535714	0.16	0.12	0.28	3.57143	16.157	57.7035
W-T	L-R_forelimbs	0.517241	0.517241	0.16	0.13	0.29	3.44828	19.2265	66.2983		W-T	L-R_hindlimbs	0.464286	0.535714	0.14	0.14	0.28	3.57143	18.694	66.7644
W-T	L-R_forelimbs	0.48	0.52	0.13	0.12	0.25	4	19.8132	79.2528		W-T	L-R_hindlimbs	0.458333	0.541667	0.13	0.1	0.23	4.34783	19.557	85.0302
W-T	L-R_forelimbs	0.518519	0.518519	0.12	0.15	0.27	3.7037	17.4746	64.7207		W-T	L-R_hindlimbs	0.548387	0.548387	0.15	0.16	0.31	3.22581	16.5984	53.5432
W-T	L-R_forelimbs	0.521739	0.521739	0.1	0.13	0.23	4.34783	15.8643	68.9753		W-T	L-R_hindlimbs	0.47619	0.52381	0.1	0.13	0.23	4.34783	14.06	61.1303
W-T	L-R_forelimbs	0.482759	0.517241	0.15	0.14	0.29	3.44828	19.2498	66.3786		W-T	L-R_hindlimbs	0.482759	0.517241	0.15	0.14	0.29	3.44828	19.3768	66.8165
W-T	L-R_forelimbs	0.464286	0.535714	0.14	0.14	0.28	3.57143	17.0186	60.7807		W-T	L-R_hindlimbs	0.451613	0.548387	0.16	0.15	0.31	3.22581	17.4024	56.1367
W-T	L-R_forelimbs	0.542857	0.542857	0.17	0.18	0.35	2.85714	15.5853	44.5295		W-T	L-R_hindlimbs	0.484848	0.515152	0.13	0.2	0.33	3.0303	15.5678	47.1751
W-T	L-R_forelimbs	0.484848	0.515152	0.16	0.17	0.33	3.0303	19.6766	59.6261		W-T	L-R_hindlimbs	0.533333	0.533333	0.15	0.15	0.3	3.33333	19.4667	64.889
W-T	L-R_forelimbs	0.53125	0.53125	0.17	0.15	0.32	3.125	18.1957	56.8616		W-T	L-R_hindlimbs	0.454545	0.545455	0.15	0.18	0.33	3.0303	18.2054	55.1678
W-T	L-R_forelimbs	0.465116	0.534884	0.16	0.18	0.34	2.94118	17.3848	51.1317		W-T	L-R_hindlimbs	0.487179	0.512821	0.19	0.2	0.39	2.5641	16.1948	41.5252
W-T	L-R_forelimbs	0.483871	0.516129	0.16	0.15	0.31	3.22581	16.8966	54.5053		W-T	L-R_hindlimbs	0.514286	0.514286	0.19	0.16	0.35	2.85714	17.3972	49.7063
W-T	L-R_forelimbs	0.53125	0.53125	0.17	0.15	0.32	3.125	18.6771	58.3658		W-T	L-R_hindlimbs	0.483871	0.516129	0.16	0.15	0.31	3.22581	18.6857	60.2763
W-T	L-R_forelimbs	0.457143	0.542857	0.18	0.17	0.35	2.85714	18.5692	53.0548		W-T	L-R_hindlimbs	0.454545	0.545455	0.18	0.15	0.33	3.0303	19.6286	59.4806
W-T	L-R_forelimbs	0.535714	0.535714	0.15	0.13	0.28	3.57143	18.9222	67.5792		W-T	L-R_hindlimbs	0.466667	0.533333	0.17	0.13	0.3	3.33333	18.5891	61.9635
W-T	L-R_forelimbs	0.518519	0.518519	0.15	0.12	0.27	3.7037	18.1165	67.0981		W-T	L-R_hindlimbs	0.518519	0.518519	0.15	0.12	0.27	3.7037	18.5476	68.6948
W-T	L-R_forelimbs	0.481481	0.518519	0.12	0.15	0.27	3.7037	13.9338	51.6068		W-T	L-R_hindlimbs	0.464286	0.535714	0.16	0.12	0.28	3.57143	16.7654	59.8764
W-T	L-R_forelimbs	0.514286	0.514286	0.16	0.19	0.35	2.85714	13.3221	38.0632		W-T	L-R_hindlimbs	0.53125	0.53125	0.15	0.17	0.32	3.125	14.6092	45.6536
W-T	L-R_forelimbs	0.515152	0.515152	0.16	0.17	0.33	3.0303	17.5682	53.237		W-T	L-R_hindlimbs	0.46875	0.53125	0.15	0.17	0.32	3.125	16.2317	50.7239
W-T	L-R_forelimbs	0.53125	0.53125	0.18	0.14	0.32	3.125	16.5168	51.615		W-T	L-R_hindlimbs	0.463415	0.536585	0.2	0.21	0.41	2.43902	17.9491	43.7783
W-T	L-R_forelimbs	0.470588	0.529412	0.18	0.16	0.34	2.94118	18.1685	53.4367		W-T	L-R_hindlimbs	0.454545	0.545455	0.17	0.16	0.33	3.0303	18.4163	55.807
W-T	L-R_forelimbs	0.46875	0.53125	0.17	0.15	0.32	3.125	19.0885	59.6517		W-T	L-R_hindlimbs	0.451613	0.548387	0.17	0.14	0.31	3.22581	19.7428	63.6865
W-T	L-R_forelimbs	0.46875	0.53125	0.16	0.16	0.32	3.125	17.9506	56.0957		W-T	L-R_hindlimbs	0.451613	0.548387	0.16	0.15	0.31	3.22581	17.9596	57.9341
W-T	L-R_forelimbs	0.475	0.525	0.19	0.21	0.4	2.5	15.0591	37.6478		W-T	L-R_hindlimbs	0.536585	0.536585	0.2	0.21	0.41	2.43902	14.3109	34.9047
W-T	L-R_forelimbs	0.535714	0.535714	0.15	0.13	0.28	3.57143	16.4737	58.8345		W-T	L-R_hindlimbs	0.451613	0.548387	0.15	0.16	0.31	3.22581	16.9124	54.556
W-T	L-R_forelimbs	0.45	0.55	0.1	0.1	0.2	5	20.8732	104.366		W-T	L-R_hindlimbs	0.454545	0.545455	0.13	0.09	0.22	4.54545	20.6109	93.6858
W-T	L-R_forelimbs	0.478261	0.521739	0.13	0.1	0.23	4.34783	19.3253	84.0229		W-T	L-R_hindlimbs	0.55	0.55	0.11	0.09	0.2	5	19.5055	97.5276
W-T	L-R_forelimbs	0.535714	0.535714	0.15	0.13	0.28	3.57143	17.4149	62.1961		W-T	L-R_hindlimbs	0.48	0.52	0.14	0.11	0.25	4	20.9054	83.6216
W-T	L-R_forelimbs	0.45	0.55	0.11	0.09	0.2	5	23.6437	118.218		W-T	L-R_hindlimbs	0.473684	0.526316	0.11	0.08	0.19	5.26316	22.8731	120.385
W-T	L-R_forelimbs	0.458333	0.541667	0.12	0.12	0.24	4.16667	23.1641	96.5169		W-T	L-R_hindlimbs	0.545455	0.545455	0.11	0.11	0.22	4.54545	18.4937	84.0622
W-T	L-R_forelimbs	0.55	0.55	0.11	0.09	0.2	5	23.6201	118.101		W-T	L-R_hindlimbs	0.55	0.55	0.12	0.08	0.2	5	21.7256	108.628
W-T	L-R_forelimbs	0.526316	0.526316	0.11	0.08	0.19	5.26316	21.1759	111.452		W-T	L-R_hindlimbs	0.473684	0.526316	0.11	0.08	0.19	5.26316	20.5123	107.959
W-T	L-R_forelimbs	0.478261	0.521739	0.14	0.09	0.23	4.34783	23.0611	100.266		W-T	L-R_hindlimbs	0.521739	0.521739	0.14	0.09	0.23	4.34783	22.0398	95.825
W-T	L-R_forelimbs	0.47619	0.52381	0.1	0.11	0.21	4.7619	15.7991	75.2339		W-T	L-R_hindlimbs	0.478261	0.521739	0.13	0.1	0.23	4.34783	15.6825	68.1846
W-T	L-R_forelimbs	0.464286	0.535714	0.15	0.13	0.28	3.57143	23.4044	83.5871		W-T	L-R_hindlimbs	0.52	0.52	0.15	0.1	0.25	4	26.2439	104.976
W-T	L-R_forelimbs	0.55	0.55	0.12	0.08	0.2	5	27.2853	136.426		W-T	L-R_hindlimbs	0.52381	0.52381	0.13	0.08	0.21	4.7619	27.6385	131.612
W-T	L-R_forelimbs	0.526316	0.526316	0.11	0.08	0.19	5.26316	23.1693	121.944		W-T	L-R_hindlimbs	0.578947	0.578947	0.12	0.07	0.19	5.26316	23.5952	124.185
W-T	L-R_forelimbs	0.526316	0.526316	0.12	0.07	0.19	5.26316	24.3347	128.078		W-T	L-R_hindlimbs	0.45	0.55	0.13	0.07	0.2	5	24.4	122
W-T	L-R_forelimbs	0.52381	0.52381	0.13	0.08	0.21	4.7619	21.5461	102.6		W-T	L-R_hindlimbs	0.45	0.55	0.13	0.07	0.2	5	21.9049	109.524
W-T	L-R_forelimbs	0.47619	0.52381	0.13	0.08	0.21	4.7619	27.9667	133.175		W-T	L-R_hindlimbs	0.478261	0.521739	0.15	0.08	0.23	4.34783	28.9646	125.933
W-T	L-R_forelimbs	0.52381	0.52381	0.13	0.08	0.21	4.7619	28.4737	135.589		W-T	L-R_hindlimbs	0.55	0.55	0.13	0.07	0.2	5	27.0921	135.46
W-T	L-R_forelimbs	0.47619	0.52381	0.11	0.1	0.21	4.7619	22.039	104.948		W-T	L-R_hindlimbs	0.47619	0.52381	0.11	0.1	0.21	4.7619	18.4773	87.9871
W-T	L-R_forelimbs	0.470588	0.529412	0.15	0.105	0.255	3.92157	19.1548	75.1169		W-T	L-R_hindlimbs	0.469388	0.530612	0.135	0.11	0.245	4.08163	19.7092	80.4456
W-T	L-R_forelimbs	0.469388	0.530612	0.15	0.095	0.245	4.08163	19.2083	78.4012		W-T	L-R_hindlimbs	0.458333	0.541667	0.135	0.105	0.24	4.16667	20.8501	86.8753
W-T	L-R_forelimbs	0.477273	0.522727	0.125	0.095	0.22	4.54545	21.2623	96.6469		W-T	L-R_hindlimbs	0.488372	0.511628	0.13	0.085	0.215	4.65116	21.4677	99.8497
W-T	L-R_forelimbs	0.488372	0.511628	0.13	0.085	0.215	4.65116	20.6832	96.2011		W-T	L-R_hindlimbs	0.487805	0.512195	0.12	0.085	0.205	4.87805	20.9444	102.168
W-T	L-R_forelimbs	0.468085	0.531915	0.12	0.115	0.235	4.25532	22.9644	97.7206		W-T	L-R_hindlimbs	0.466667	0.533333	0.12	0.105	0.225	4.44444	24.9348	110.821
W-T	L-R_forelimbs	0.487805	0.512195	0.125	0.08	0.205	4.87805	23.3826	114.062		W-T	L-R_hindlimbs	0.454545	0.545455	0.115	0.105	0.22	4.54545	26.5036	120.471
W-T	L-R_forelimbs	0.466667	0.533333	0.125	0.1	0.225	4.44444	19.7959	87.982		W-T	L-R_hindlimbs	0.458333	0.541667	0.1	0.14	0.24	4.16667	20.0625	83.5938
W-T	L-R_forelimbs	0.466667	0.533333	0.09	0.095	0.185	5.40541	21.8048	117.864		W-T	L-R_hindlimbs	0.490196	0.509804	0.05	0.12	0.17	5.88235	14.3781	84.5772
W-T	L-R_forelimbs	0.512821	0.512821	0.105	0.09	0.195	5.12821	24.0188	123.173		W-T	L-R_hindlimbs	0.514286	0.514286	0.105	0.07	0.175	5.71429	23.9512	136.864
W-T	L-R_forelimbs	0.472727	0.527273	0.12	0.155	0.275	3.63636	19.2492	69.9971		W-T	L-R_hindlimbs	0.479167	0.520833	0.125	0.115	0.24	4.16667	20.2739	84.4745
W-T	L-R_forelimbs	0.545455	0.545455	0.125	0.095	0.22	4.54545	21.0233	95.5607		W-T	L-R_hindlimbs	0.465116	0.534884	0.12	0.095	0.215	4.65116	21.5482	100.224
W-T	L-R_forelimbs	0.477273	0.522727	0.105	0.115	0.22	4.54545	21.5458	97.9354		W-T	L-R_hindlimbs	0.465116	0.534884	0.12	0.095	0.215	4.65116	21.912	101.916
W-T	L-R_forelimbs	0.477273	0.522727	0.105	0.115	0.22	4.54545	18.7756	85.3436		W-T	L-R_hindlimbs	0.454545	0.545455	0.115	0.105	0.22	4.54545	18.4424	83.8291
W-T	L-R_forelimbs	0.466667	0.533333	0.11	0.115	0.225	4.44444	19.3599	86.044		W-T	L-R_hindlimbs	0.466667	0.533333	0.125	0.1	0.225	4.44444	19.7884	87.9482
W-T	L-R_forelimbs	0.512195	0.512195	0.115	0.09	0.205	4.87805	26.8552	131.001		W-T	L-R_hindlimbs	0.472222	0.527778	0.11	0.07	0.18	5.55556	28.633	159.072
W-T	L-R_forelimbs	0.515152	0.515152	0.09	0.075	0.165	6.06061	21.8287	132.295		W-T	L-R_hindlimbs	0.516129	0.516129	0.09	0.065	0.155	6.45161	19.2988	124.508
W-T	L-R_forelimbs	0.510638	0.510638	0.12	0.115	0.235	4.25532	20.2009	85.9614		W-T	L-R_hindlimbs	0.533333	0.533333	0.13	0.095	0.225	4.44444	21.2835	94.5932
W-T	L-R_forelimbs	0.477273	0.522727	0.125	0.095	0.22	4.54545	23.6389	107.45		W-T	L-R_hindlimbs	0.47619	0.52381	0.13	0.08	0.21	4.7619	24.7585	117.898
W-T	L-R_forelimbs	0.47619	0.52381	0.13	0.08	0.21	4.7619	24.975	118.929		W-T	L-R_hindlimbs	0.487805	0.512195	0.135	0.07	0.205	4.87805	24.9759	121.834
W-T	L-R_forelimbs	0.521739	0.521739	0.135	0.095	0.23	4.34783	23.8405	103.655		W-T	L-R_hindlimbs	0.510638	0.510638	0.135	0.1	0.235	4.25532	23.8223	101.371
W-T	L-R_forelimbs	0.491525	0.508475	0.13	0.165	0.295	3.38983	15.7495	53.3883		W-T	L-R_hindlimbs	0.451613	0.548387	0.15	0.16	0.31	3.22581	19.7596	63.7406
W-T	L-R_forelimbs	0.54	0.54	0.13	0.12	0.25	4	20.436	81.7441		W-T	L-R_hindlimbs	0.481481	0.518519	0.13	0.14	0.27	3.7037	15.3851	56.9819
W-T	L-R_forelimbs	0.52381	0.52381	0.12	0.09	0.21	4.7619	30.888	147.086		W-T	L-R_hindlimbs	0.477273	0.522727	0.135	0.085	0.22	4.54545	21.9865	99.9388
W-T	L-R_forelimbs	0.48	0.52	0.145	0.105	0.25	4	19.1461	76.5844		W-T	L-R_hindlimbs	0.479167	0.520833	0.145	0.095	0.24	4.16667	17.7254	73.8559
W-T	L-R_forelimbs	0.52381	0.52381	0.12	0.09	0.21	4.7619	24.2416	115.436		W-T	L-R_hindlimbs	0.513514	0.513514	0.11	0.075	0.185	5.40541	22.8282	123.396
W-T	L-R_forelimbs	0.488372	0.511628	0.13	0.085	0.215	4.65116	32.124	149.414		W-T	L-R_hindlimbs	0.477273	0.522727	0.13	0.09	0.22	4.54545	32.6695	148.498
W-T	L-R_forelimbs	0.538462	0.538462	0.12	0.075	0.195	5.12821	23.6457	121.26		W-T	L-R_hindlimbs	0.55	0.55	0.14	0.06	0.2	5	23.7668	118.834
W-T	L-R_forelimbs	0.519231	0.519231	0.15	0.11	0.26	3.84615	19.4549	74.8265		W-T	L-R_hindlimbs	0.530612	0.530612	0.155	0.09	0.245	4.08163	19.8637	81.0765
W-T	L-R_forelimbs	0.521739	0.521739	0.135	0.095	0.23	4.34783	23.7022	103.053		W-T	L-R_hindlimbs	0.456522	0.543478	0.155	0.075	0.23	4.34783	21.6384	94.0802
W-T	L-R_forelimbs	0.533333	0.533333	0.125	0.1	0.225	4.44444	24.8447	110.421		W-T	L-R_hindlimbs	0.489362	0.510638	0.15	0.085	0.235	4.25532	24.0972	102.541
W-T	L-R_forelimbs	0.474576	0.525424	0.17	0.125	0.295	3.38983	20.4363	69.2756		W-T	L-R_hindlimbs	0.467742	0.532258	0.175	0.135	0.31	3.22581	20.9911	67.7134
W-T	L-R_forelimbs	0.542373	0.542373	0.17	0.125	0.295	3.38983	18.3266	62.124		W-T	L-R_hindlimbs	0.508772	0.508772	0.16	0.125	0.285	3.50877	19.0503	66.8431
W-T	L-R_forelimbs	0.511111	0.511111	0.13	0.095	0.225	4.44444	24.1942	107.53		W-T	L-R_hindlimbs	0.547619	0.547619	0.14	0.07	0.21	4.7619	24.0569	114.557
W-T	L-R_forelimbs	0.52381	0.52381	0.12	0.09	0.21	4.7619	20.8365	99.2214		W-T	L-R_hindlimbs	0.545455	0.545455	0.145	0.075	0.22	4.54545	20.8444	94.7472
W-T	L-R_forelimbs	0.545455	0.545455	0.155	0.12	0.275	3.63636	21.6582	78.757		W-T	L-R_hindlimbs	0.511628	0.511628	0.13	0.085	0.215	4.65116	20.7588	96.5524
W-T	L-R_forelimbs	0.527778	0.527778	0.09	0.09	0.18	5.55556	26.5294	147.386		W-T	L-R_hindlimbs	0.477273	0.522727	0.13	0.09	0.22	4.54545	26.6894	121.315
W-T	L-R_forelimbs	0.489362	0.510638	0.12	0.115	0.235	4.25532	21.1336	89.9303		W-T	L-R_hindlimbs	0.465116	0.534884	0.125	0.09	0.215	4.65116	21.1827	98.5244
W-T	L-R_forelimbs	0.534884	0.534884	0.115	0.1	0.215	4.65116	20.119	93.5768		W-T	L-R_hindlimbs	0.477273	0.522727	0.135	0.085	0.22	4.54545	20.4441	92.9277
W-T	L-R_forelimbs	0.511628	0.511628	0.125	0.09	0.215	4.65116	22.3629	104.014		W-T	L-R_hindlimbs	0.510638	0.510638	0.15	0.085	0.235	4.25532	19.8504	84.4698
W-T	L-R_forelimbs	0.463415	0.536585	0.12	0.085	0.205	4.87805	21.6096	105.413		W-T	L-R_hindlimbs	0.465116	0.534884	0.14	0.075	0.215	4.65116	23.1568	107.706
W-T	L-R_forelimbs	0.489362	0.510638	0.11	0.125	0.235	4.25532	18.7467	79.7731		W-T	L-R_hindlimbs	0.511628	0.511628	0.13	0.085	0.215	4.65116	18.5468	86.2642
W-T	L-R_forelimbs	0.521739	0.521739	0.13	0.1	0.23	4.34783	23.2104	100.915		W-T	L-R_hindlimbs	0.511111	0.511111	0.15	0.075	0.225	4.44444	24.5479	109.102
W-T	L-R_forelimbs	0.52381	0.52381	0.125	0.085	0.21	4.7619	21.3417	101.627		W-T	L-R_hindlimbs	0.477273	0.522727	0.135	0.085	0.22	4.54545	21.2905	96.7749
W-T	L-R_forelimbs	0.52381	0.52381	0.1	0.11	0.21	4.7619	17.2876	82.3221		W-T	L-R_hindlimbs	0.454545	0.545455	0.13	0.09	0.22	4.54545	17.2383	78.356
W-T	L-R_forelimbs	0.469388	0.530612	0.125	0.12	0.245	4.08163	20.1146	82.1004		W-T	L-R_hindlimbs	0.52	0.52	0.12	0.13	0.25	4	27.6276	110.51
W-T	L-R_forelimbs	0.47619	0.52381	0.12	0.09	0.21	4.7619	22.4254	106.787		W-T	L-R_hindlimbs	0.466667	0.533333	0.14	0.085	0.225	4.44444	20.745	92.1999
W-T	L-R_forelimbs	0.465116	0.534884	0.12	0.095	0.215	4.65116	19.4708	90.5618		W-T	L-R_hindlimbs	0.475	0.525	0.13	0.07	0.2	5	21.4807	107.403
W-T	L-R_forelimbs	0.52	0.52	0.13	0.12	0.25	4	19.5995	78.398		W-T	L-R_hindlimbs	0.508772	0.508772	0.17	0.115	0.285	3.50877	18.9059	66.3365
W-T	L-R_forelimbs	0.478261	0.521739	0.115	0.115	0.23	4.34783	19.8537	86.3204		W-T	L-R_hindlimbs	0.541667	0.541667	0.145	0.095	0.24	4.16667	19.1254	79.6892
W-T	L-R_forelimbs	0.458333	0.541667	0.13	0.11	0.24	4.16667	30.7738	128.224		W-T	L-R_hindlimbs	0.454545	0.545455	0.135	0.085	0.22	4.54545	19.9048	90.4762
W-T	L-R_forelimbs	0.488372	0.511628	0.125	0.09	0.215	4.65116	22.1961	103.238		W-T	L-R_hindlimbs	0.511628	0.511628	0.15	0.065	0.215	4.65116	23.8001	110.698
W-T	L-R_forelimbs	0.538462	0.538462	0.11	0.085	0.195	5.12821	23.9564	122.853		W-T	L-R_hindlimbs	0.52381	0.52381	0.145	0.065	0.21	4.7619	22.1294	105.378
W-T	L-R_forelimbs	0.522727	0.522727	0.12	0.1	0.22	4.54545	23.5439	107.018		W-T	L-R_hindlimbs	0.547619	0.547619	0.15	0.06	0.21	4.7619	24.0733	114.635
W-T	L-R_forelimbs	0.542373	0.542373	0.135	0.16	0.295	3.38983	16.3313	55.3604		W-T	L-R_hindlimbs	0.483871	0.516129	0.16	0.15	0.31	3.22581	18.6309	60.0995
W-T	L-R_forelimbs	0.479167	0.520833	0.115	0.125	0.24	4.16667	18.1589	75.6622		W-T	L-R_hindlimbs	0.509091	0.509091	0.14	0.135	0.275	3.63636	18.6294	67.7434
W-T	L-R_forelimbs	0.468085	0.531915	0.115	0.12	0.235	4.25532	17.7512	75.537		W-T	L-R_hindlimbs	0.468085	0.531915	0.145	0.09	0.235	4.25532	20.9034	88.9505
W-T	L-R_forelimbs	0.52381	0.52381	0.125	0.085	0.21	4.7619	23.6649	112.69		W-T	L-R_hindlimbs	0.465116	0.534884	0.14	0.075	0.215	4.65116	20.9277	97.338
W-T	L-R_forelimbs	0.521739	0.521739	0.115	0.09	0.205	4.87805	23.1419	112.887		W-T	L-R_hindlimbs	0.477273	0.522727	0.15	0.075	0.225	4.44444	31.6416	140.629
W-T	L-R_forelimbs	0.536585	0.536585	0.11	0.095	0.205	4.87805	21.1829	103.331		W-T	L-R_hindlimbs	0.511111	0.511111	0.145	0.07	0.215	4.65116	23.7145	110.3
G	L-R_forelimbs	0.210526	0.789474	0.13	0.06	0.19	5.26316	25.3233	133.281		G	L-R_hindlimbs	0.2	0.8	0.12	0.08	0.2	5	39.8698	199.349
G	L-R_forelimbs	0.25641	0.74359	0.12	0.075	0.195	5.12821	21.9362	112.493		G	L-R_hindlimbs	0.216216	0.783784	0.115	0.07	0.185	5.40541	21.7729	117.691
G	L-R_forelimbs	0.347826	0.652174	0.1	0.13	0.23	4.34783	16.3822	71.2269		G	L-R_hindlimbs	0.32	0.68	0.1	0.15	0.25	4	14.9892	59.9567
G	L-R_forelimbs	0.35	0.65	0.11	0.09	0.2	5	22.2622	111.311		G	L-R_hindlimbs	0.315789	0.684211	0.12	0.07	0.19	5.26316	22.048	116.042
G	L-R_forelimbs	0.333333	0.666667	0.11	0.07	0.18	5.55556	22.6008	125.56		G	L-R_hindlimbs	0.157895	0.842105	0.11	0.08	0.19	5.26316	23.9764	126.192
G	L-R_forelimbs	0.315789	0.684211	0.13	0.06	0.19	5.26316	26.9162	141.664		G	L-R_hindlimbs	0.166667	0.833333	0.11	0.07	0.18	5.55556	21.4666	119.259
G	L-R_forelimbs	0.333333	0.666667	0.11	0.07	0.18	5.55556	27.2224	151.236		G	L-R_hindlimbs	0.176471	0.823529	0.1	0.07	0.17	5.88235	27.5416	162.009
G	L-R_forelimbs	0.166667	0.833333	0.11	0.08	0.19	5.26316	18.9569	99.7734		G	L-R_hindlimbs	0.176471	0.823529	0.1	0.07	0.17	5.88235	42.44	249.647
G	L-R_forelimbs	0.315789	0.684211	0.11	0.08	0.19	5.26316	20.8041	109.495		G	L-R_hindlimbs	0.157895	0.842105	0.12	0.07	0.19	5.26316	25.7141	135.337
G	L-R_forelimbs	0.333333	0.666667	0.12	0.09	0.21	4.7619	44.4107	211.479		G	L-R_hindlimbs	0.157895	0.842105	0.11	0.1	0.21	4.7619	45.4272	216.32
G	L-R_forelimbs	0.333333	0.666667	0.09	0.1	0.19	5.26316	17.5249	92.2362		G	L-R_hindlimbs	0.190476	0.809524	0.09	0.1	0.19	5.26316	15.806	83.1896
G	L-R_forelimbs	0.315789	0.684211	0.12	0.07	0.19	5.26316	24.4052	128.448		G	L-R_hindlimbs	0.157895	0.842105	0.12	0.07	0.19	5.26316	26.1796	137.787
G	L-R_forelimbs	0.315789	0.684211	0.14	0.05	0.19	5.26316	24.8593	130.838		G	L-R_hindlimbs	0.157895	0.842105	0.1	0.08	0.18	5.55556	38.4982	213.879
G	L-R_forelimbs	0.333333	0.666667	0.11	0.07	0.18	5.55556	39.1913	217.729		G	L-R_hindlimbs	0.157895	0.842105	0.11	0.08	0.19	5.26316	24.6036	129.492
G	L-R_forelimbs	0.340426	0.659574	0.11	0.105	0.215	4.65116	16.1765	75.2395		G	L-R_hindlimbs	0.319149	0.680851	0.11	0.11	0.22	4.54545	16.6141	75.5185
G	L-R_forelimbs	0.305556	0.694444	0.11	0.085	0.195	5.12821	21.2668	109.06		G	L-R_hindlimbs	0.162162	0.837838	0.105	0.105	0.21	4.7619	19.6829	93.7281
G	L-R_forelimbs	0.333333	0.666667	0.11	0.07	0.18	5.55556	22.5765	125.425		G	L-R_hindlimbs	0.314286	0.685714	0.1	0.075	0.175	5.71429	29.9526	171.158
G	L-R_forelimbs	0.172414	0.827586	0.09	0.055	0.145	6.89655	25.8505	178.279		G	L-R_hindlimbs	0.171429	0.828571	0.115	0.06	0.175	5.71429	25.0237	142.993
G	L-R_forelimbs	0.333333	0.666667	0.1	0.065	0.165	6.06061	23.8697	144.665		G	L-R_hindlimbs	0.193548	0.806452	0.095	0.06	0.155	6.45161	23.5902	152.195
G	L-R_forelimbs	0.823529	0.823529	0.1	0.07	0.17	5.88235	26.7648	157.44		G	L-R_hindlimbs	0.842105	0.842105	0.11	0.08	0.19	5.26316	27.2051	143.185
G	L-R_forelimbs	0.666667	0.666667	0.105	0.06	0.165	6.06061	28.2016	170.919		G	L-R_hindlimbs	0.83871	0.83871	0.1	0.055	0.155	6.45161	27.8316	179.559
G	L-R_forelimbs	0.314286	0.685714	0.095	0.08	0.175	5.71429	23.4517	134.01		G	L-R_hindlimbs	0.153846	0.846154	0.125	0.07	0.195	5.12821	23.0708	118.312
G	L-R_forelimbs	0.317073	0.682927	0.12	0.085	0.205	4.87805	23.2793	113.558		G	L-R_hindlimbs	0.170732	0.829268	0.115	0.09	0.205	4.87805	19.1021	93.1811
G	L-R_forelimbs	0.302326	0.697674	0.135	0.08	0.215	4.65116	22.2043	103.276		G	L-R_hindlimbs	0.170732	0.829268	0.125	0.08	0.205	4.87805	22.5394	109.949
G	L-R_forelimbs	0.317073	0.682927	0.125	0.08	0.205	4.87805	20.9169	102.034		G	L-R_hindlimbs	0.195122	0.804878	0.125	0.08	0.205	4.87805	21.1999	103.414
G	L-R_forelimbs	0.657895	0.657895	0.105	0.085	0.19	5.26316	24.516	129.031		G	L-R_hindlimbs	0.833333	0.833333	0.11	0.07	0.18	5.55556	22.7985	126.659
G	L-R_forelimbs	0.302326	0.697674	0.145	0.12	0.265	3.77358	18.2992	69.0535		G	L-R_hindlimbs	0.25	0.75	0.105	0.135	0.24	4.16667	18.5247	77.1863
G	L-R_forelimbs	0.75	0.75	0.135	0.065	0.2	5	29.8836	149.418		G	L-R_hindlimbs	0.815789	0.815789	0.12	0.07	0.19	5.26316	33.7842	177.811
G	L-R_forelimbs	0.315789	0.684211	0.11	0.08	0.19	5.26316	20.6438	108.651		G	L-R_hindlimbs	0.222222	0.777778	0.11	0.07	0.18	5.55556	20.1287	111.826
G	L-R_forelimbs	0.333333	0.666667	0.14	0.05	0.19	5.26316	26.9143	141.654		G	L-R_hindlimbs	0.227273	0.772727	0.1	0.08	0.18	5.55556	25.3527	140.848
G	L-R_forelimbs	0.684211	0.684211	0.11	0.08	0.19	5.26316	22.9246	120.656		G	L-R_hindlimbs	0.777778	0.777778	0.12	0.06	0.18	5.55556	19.9488	110.827
G	L-R_forelimbs	0.35	0.65	0.12	0.08	0.2	5	19.9758	99.879		G	L-R_hindlimbs	0.210526	0.789474	0.12	0.07	0.19	5.26316	19.7971	104.195
G	L-R_forelimbs	0.333333	0.666667	0.11	0.07	0.18	5.55556	43.4711	241.506		G	L-R_hindlimbs	0.2	0.8	0.1	0.07	0.17	5.88235	44.5033	261.784
G	L-R_forelimbs	0.35	0.65	0.105	0.065	0.17	5.88235	23.3623	137.425		G	L-R_hindlimbs	0.228571	0.771429	0.105	0.06	0.165	6.06061	24.2975	147.257
G	L-R_forelimbs	0.302326	0.697674	0.145	0.07	0.215	4.65116	28.0472	130.452		G	L-R_hindlimbs	0.205128	0.794872	0.12	0.075	0.195	5.12821	33.8018	173.342
G	L-R_forelimbs	0.333333	0.666667	0.095	0.07	0.165	6.06061	20.0025	121.228		G	L-R_hindlimbs	0.205882	0.794118	0.095	0.065	0.16	6.25	29.7196	185.747
G	L-R_forelimbs	0.315789	0.684211	0.105	0.085	0.19	5.26316	20.66	108.737		G	L-R_hindlimbs	0.204545	0.795455	0.13	0.09	0.22	4.54545	23.5489	107.04
G	L-R_forelimbs	0.35	0.65	0.13	0.07	0.2	5	30.051	150.255		G	L-R_hindlimbs	0.268293	0.731707	0.125	0.08	0.205	4.87805	30.4256	148.417
G	L-R_forelimbs	0.35	0.65	0.12	0.08	0.2	5	22.3063	111.532		G	L-R_hindlimbs	0.3	0.7	0.125	0.075	0.2	5	30.5328	152.664
G	L-R_forelimbs	0.666667	0.666667	0.125	0.085	0.21	4.7619	33.2664	158.412		G	L-R_hindlimbs	0.763158	0.763158	0.11	0.08	0.19	5.26316	22.586	118.874
G	L-R_forelimbs	0.307692	0.692308	0.1	0.095	0.195	5.12821	20.6856	106.08		G	L-R_hindlimbs	0.25641	0.74359	0.11	0.085	0.195	5.12821	18.2848	93.7684
G	L-R_forelimbs	0.294118	0.705882	0.11	0.06	0.17	5.88235	23.2334	136.667		G	L-R_hindlimbs	0.157895	0.842105	0.12	0.07	0.19	5.26316	24.7004	130.002
G	L-R_forelimbs	0.285714	0.714286	0.13	0.08	0.21	4.7619	23.4836	111.827		G	L-R_hindlimbs	0.166667	0.833333	0.09	0.09	0.18	5.55556	16.3215	90.675
G	L-R_forelimbs	0.263158	0.736842	0.1	0.09	0.19	5.26316	19.1135	100.597		G	L-R_hindlimbs	0.166667	0.833333	0.1	0.09	0.19	5.26316	45.3627	238.751
G	L-R_forelimbs	0.3	0.7	0.1	0.1	0.2	5	14.296	71.4799		G	L-R_hindlimbs	0.157895	0.842105	0.1	0.09	0.19	5.26316	19.3637	101.914
G	L-R_forelimbs	0.235294	0.764706	0.1	0.09	0.19	5.26316	22.2095	116.892		G	L-R_hindlimbs	0.166667	0.833333	0.12	0.1	0.22	4.54545	22.221	101.005
G	L-R_forelimbs	0.257143	0.742857	0.11	0.07	0.18	5.55556	24.0395	133.553		G	L-R_hindlimbs	0.184211	0.815789	0.11	0.075	0.185	5.40541	22.7469	122.956
G	L-R_forelimbs	0.275	0.725	0.115	0.1	0.215	4.65116	17.9835	83.6442		G	L-R_hindlimbs	0.162162	0.837838	0.1	0.1	0.2	5	17.7816	88.9081
G	L-R_forelimbs	0.285714	0.714286	0.105	0.07	0.175	5.71429	20.0084	114.334		G	L-R_hindlimbs	0.181818	0.818182	0.105	0.06	0.165	6.06061	18.6652	113.122
G	L-R_forelimbs	0.702703	0.702703	0.11	0.075	0.185	5.40541	23.7735	128.505		G	L-R_hindlimbs	0.825	0.825	0.13	0.07	0.2	5	24.9474	124.737
G	L-R_forelimbs	0.702703	0.702703	0.105	0.08	0.185	5.40541	26.9257	145.545		G	L-R_hindlimbs	0.842105	0.842105	0.12	0.07	0.19	5.26316	26.4752	139.343
HB	L-R_forelimbs	0.25	0.75	0.11	0.05	0.16	6.25	29.0521	181.576		HB	L-R_hindlimbs	1	1	0.1	0.05	0.15	6.66667	29.377	195.846
HB	L-R_forelimbs	0.25	0.75	0.11	0.05	0.16	6.25	27.371	171.069		HB	L-R_hindlimbs	1	1	0.1	0.04	0.14	7.14286	26.4485	188.918
HB	L-R_forelimbs	0.25	0.75	0.11	0.06	0.17	5.88235	24.4296	143.703		HB	L-R_hindlimbs	1	1	0.13	0.05	0.18	5.55556	22.5368	125.204
HB	L-R_forelimbs	0.25	0.75	0.13	0.07	0.2	5	26.401	132.005		HB	L-R_hindlimbs	1	1	0.12	0.06	0.18	5.55556	27.6604	153.669
HB	L-R_forelimbs	0.266667	0.733333	0.11	0.05	0.16	6.25	27.3045	170.653		HB	L-R_hindlimbs	1	1	0.13	0.05	0.18	5.55556	27.8501	154.723
HB	L-R_forelimbs	0.733333	0.733333	0.1	0.05	0.15	6.66667	24.3888	162.592		HB	L-R_hindlimbs	1	1	0.12	0.05	0.17	5.88235	25.9058	152.387
HB	L-R_forelimbs	0.733333	0.733333	0.1	0.05	0.15	6.66667	23.8754	159.169		HB	L-R_hindlimbs	1	1	0.08	0.06	0.14	7.14286	21.2888	152.063
HB	L-R_forelimbs	0.277778	0.722222	0.12	0.06	0.18	5.55556	27.7296	154.053		HB	L-R_hindlimbs	1	1	0.09	0.07	0.16	6.25	25.2881	158.051
HB	L-R_forelimbs	0.222222	0.777778	0.12	0.06	0.18	5.55556	24.0539	133.633		HB	L-R_hindlimbs	0	1	0.1	0.07	0.17	5.88235	26.2596	154.468
HB	L-R_forelimbs	0.277778	0.722222	0.12	0.06	0.18	5.55556	22.2531	123.628		HB	L-R_hindlimbs	0	1	0.11	0.08	0.19	5.26316	24.7173	130.091
HB	L-R_forelimbs	0.8	0.8	0.09	0.06	0.15	6.66667	23.8714	159.143		HB	L-R_hindlimbs	1	1	0.09	0.07	0.16	6.25	27.1719	169.824
HB	L-R_forelimbs	0.705882	0.705882	0.12	0.05	0.17	5.88235	26.5639	156.258		HB	L-R_hindlimbs	1	1	0.09	0.06	0.15	6.66667	25.6994	171.329
HB	L-R_forelimbs	0.210526	0.789474	0.13	0.06	0.19	5.26316	31.6624	166.644		HB	L-R_hindlimbs	1	1	0.12	0.1	0.22	4.54545	30.5328	138.786
HB	L-R_forelimbs	0.222222	0.777778	0.13	0.05	0.18	5.55556	31.4152	174.529		HB	L-R_hindlimbs	1	1	0.13	0.05	0.18	5.55556	31.596	175.533
HB	L-R_forelimbs	0.2	0.8	0.09	0.06	0.15	6.66667	34.0695	227.13		HB	L-R_hindlimbs	0	1	0.1	0.05	0.15	6.66667	34.9661	233.108
HB	L-R_forelimbs	0.763158	0.763158	0.13	0.06	0.19	5.26316	29.1483	153.412		HB	L-R_hindlimbs	1	1	0.11	0.065	0.175	5.71429	29.2221	166.983
HB	L-R_forelimbs	0.210526	0.789474	0.13	0.06	0.19	5.26316	31.3486	164.993		HB	L-R_hindlimbs	0	1	0.11	0.07	0.18	5.55556	35.6105	197.836
HB	L-R_forelimbs	0.774194	0.774194	0.09	0.065	0.155	6.45161	23.5207	151.746		HB	L-R_hindlimbs	1	1	0.095	0.06	0.155	6.45161	21.223	136.923
HB	L-R_forelimbs	0.8	0.8	0.105	0.07	0.175	5.71429	35.0309	200.177		HB	L-R_hindlimbs	1	1	0.13	0.055	0.185	5.40541	36.7773	198.796
HB	L-R_forelimbs	0.794118	0.794118	0.1	0.07	0.17	5.88235	25.0772	147.513		HB	L-R_hindlimbs	1	1	0.12	0.05	0.17	5.88235	25.8962	152.33
HB	L-R_forelimbs	0.714286	0.714286	0.1	0.075	0.175	5.71429	27.6245	157.854		HB	L-R_hindlimbs	1	1	0.11	0.08	0.19	5.26316	29.6958	156.294
HB	L-R_forelimbs	0.75	0.75	0.11	0.05	0.16	6.25	26.7516	167.198		HB	L-R_hindlimbs	0.9375	0.9375	0.1	0.06	0.16	6.25	27.9787	174.867
HB	L-R_forelimbs	0.25	0.75	0.1	0.05	0.15	6.66667	27.6797	184.532		HB	L-R_hindlimbs	0.0625	0.9375	0.09	0.06	0.15	6.66667	26.9973	179.982
HB	L-R_forelimbs	0.75	0.75	0.1	0.06	0.16	6.25	27.509	171.931		HB	L-R_hindlimbs	0.9375	0.9375	0.1	0.06	0.16	6.25	28.9161	180.726
HB	L-R_forelimbs	0.75	0.75	0.09	0.07	0.16	6.25	21.8906	136.816		HB	L-R_hindlimbs	0.941176	0.941176	0.1	0.07	0.17	5.88235	27.5804	162.237
HB	L-R_forelimbs	0.25	0.75	0.13	0.07	0.2	5	28.8465	144.233		HB	L-R_hindlimbs	0.0625	0.9375	0.1	0.06	0.16	6.25	24.016	150.1
HB	L-R_forelimbs	0.25	0.75	0.11	0.05	0.16	6.25	32.9671	206.045		HB	L-R_hindlimbs	0.0526316	0.947368	0.12	0.07	0.19	5.26316	31.9729	168.278
HB	L-R_forelimbs	0.25	0.75	0.12	0.07	0.19	5.26316	24.1702	127.212		HB	L-R_hindlimbs	0.0555556	0.944444	0.09	0.1	0.19	5.26316	38.514	202.705
HB	L-R_forelimbs	0.25	0.75	0.095	0.065	0.16	6.25	20.0674	125.421		HB	L-R_hindlimbs	0.0909091	0.909091	0.095	0.07	0.165	6.06061	33.0605	200.366
HB	L-R_forelimbs	0.75	0.75	0.09	0.05	0.14	7.14286	26.9808	192.72		HB	L-R_hindlimbs	0.970588	0.970588	0.11	0.06	0.17	5.88235	26.6101	156.53
HB	L-R_forelimbs	0.75	0.75	0.08	0.06	0.14	7.14286	22.4955	160.682		HB	L-R_hindlimbs	0.935484	0.935484	0.105	0.05	0.155	6.45161	24.3439	157.057
HB	L-R_forelimbs	0.25	0.75	0.11	0.05	0.16	6.25	38.5881	241.176		HB	L-R_hindlimbs	0.0882353	0.911765	0.13	0.04	0.17	5.88235	29.2716	172.186
HB	L-R_forelimbs	0.75	0.75	0.14	0.08	0.22	4.54545	24.6845	112.202		HB	L-R_hindlimbs	0.923077	0.923077	0.13	0.065	0.195	5.12821	24.7881	127.118
HB	L-R_forelimbs	0.2	0.8	0.1	0.05	0.15	6.66667	27.9548	186.365		HB	L-R_hindlimbs	0.0625	0.9375	0.1	0.06	0.16	6.25	28.488	178.05
HB	L-R_forelimbs	0.266667	0.733333	0.11	0.04	0.15	6.66667	29.527	196.847		HB	L-R_hindlimbs	0.0666667	0.933333	0.11	0.06	0.17	5.88235	31.8411	187.301
HB	L-R_forelimbs	0.294118	0.705882	0.12	0.05	0.17	5.88235	28.4277	167.222		HB	L-R_hindlimbs	0.0625	0.9375	0.11	0.05	0.16	6.25	27.7301	173.313
HB	L-R_forelimbs	0.785714	0.785714	0.08	0.06	0.14	7.14286	27.8245	198.747		HB	L-R_hindlimbs	0.9375	0.9375	0.1	0.06	0.16	6.25	29.6565	185.353
HB	L-R_forelimbs	0.705882	0.705882	0.11	0.06	0.17	5.88235	27.2776	160.456		HB	L-R_hindlimbs	0.941176	0.941176	0.11	0.06	0.17	5.88235	28.1265	165.45
HB	L-R_forelimbs	0.705882	0.705882	0.11	0.06	0.17	5.88235	25.4399	149.646		HB	L-R_hindlimbs	0.9375	0.9375	0.1	0.06	0.16	6.25	25.4873	159.296
HB	L-R_forelimbs	0.3	0.7	0.13	0.07	0.2	5	25.8029	129.014		HB	L-R_hindlimbs	0.1	0.9	0.1	0.09	0.19	5.26316	23.0097	121.104
HB	L-R_forelimbs	0.235294	0.764706	0.12	0.05	0.17	5.88235	24.4478	143.811		HB	L-R_hindlimbs	0.0526316	0.947368	0.11	0.07	0.18	5.55556	24.5596	136.442
HB	L-R_forelimbs	0.222222	0.777778	0.12	0.06	0.18	5.55556	25.9467	144.148		HB	L-R_hindlimbs	0.0588235	0.941176	0.11	0.07	0.18	5.55556	25.2816	140.453
HB	L-R_forelimbs	0.8	0.8	0.09	0.06	0.15	6.66667	26.9363	179.575		HB	L-R_hindlimbs	0.941176	0.941176	0.1	0.07	0.17	5.88235	30.2323	177.837
HB	L-R_forelimbs	0.705882	0.705882	0.11	0.06	0.17	5.88235	22.9904	135.237		HB	L-R_hindlimbs	0.944444	0.944444	0.12	0.06	0.18	5.55556	22.4428	124.682
HB	L-R_forelimbs	0.733333	0.733333	0.09	0.06	0.15	6.66667	23.5995	157.33		HB	L-R_hindlimbs	0.941176	0.941176	0.1	0.07	0.17	5.88235	25.33	149
HB	L-R_forelimbs	0.705882	0.705882	0.09	0.08	0.17	5.88235	27.6606	162.709		HB	L-R_hindlimbs	0.941176	0.941176	0.09	0.08	0.17	5.88235	27.0953	159.384
HB	L-R_forelimbs	0.294118	0.705882	0.12	0.05	0.17	5.88235	28.1535	165.609		HB	L-R_hindlimbs	0.0588235	0.941176	0.11	0.06	0.17	5.88235	28.9778	170.458
HB	L-R_forelimbs	0.8	0.8	0.09	0.06	0.15	6.66667	26.2006	174.671		HB	L-R_hindlimbs	0.941176	0.941176	0.1	0.07	0.17	5.88235	25.2255	148.385
HB	L-R_forelimbs	0.235294	0.764706	0.12	0.05	0.17	5.88235	27.9688	164.523		HB	L-R_hindlimbs	0.0526316	0.947368	0.11	0.07	0.18	5.55556	29.2343	162.413
HB	L-R_forelimbs	0.263158	0.736842	0.13	0.06	0.19	5.26316	26.0491	137.101		HB	L-R_hindlimbs	0.0526316	0.947368	0.12	0.07	0.19	5.26316	27.1344	142.813
HB	L-R_forelimbs	0.285714	0.714286	0.15	0.06	0.21	4.7619	28.333	134.919		HB	L-R_hindlimbs	0.1	0.9	0.13	0.07	0.2	5	29.1372	145.686
HB	L-R_forelimbs	0.277778	0.722222	0.13	0.05	0.18	5.55556	27.8048	154.471		HB	L-R_hindlimbs	0.0526316	0.947368	0.11	0.08	0.19	5.26316	28.5068	150.036
HB	L-R_forelimbs	0.285714	0.714286	0.08	0.06	0.14	7.14286	17.4569	124.692		HB	L-R_hindlimbs	0.0526316	0.947368	0.13	0.06	0.19	5.26316	29.4215	154.85
HB	L-R_forelimbs	0.222222	0.777778	0.14	0.04	0.18	5.55556	29.8146	165.637		HB	L-R_hindlimbs	0.0555556	0.944444	0.11	0.06	0.17	5.88235	26.074	153.376
HB	L-R_forelimbs	0.222222	0.777778	0.13	0.05	0.18	5.55556	28.4063	157.813		HB	L-R_hindlimbs	0.0588235	0.941176	0.13	0.05	0.18	5.55556	30.071	167.061
HB	L-R_forelimbs	0.294118	0.705882	0.12	0.05	0.17	5.88235	25.9571	152.689		HB	L-R_hindlimbs	0.0555556	0.944444	0.13	0.06	0.19	5.26316	29.1669	153.51
HB	L-R_forelimbs	0.26087	0.73913	0.17	0.06	0.23	4.34783	38.7882	168.644		HB	L-R_hindlimbs	0.0588235	0.941176	0.12	0.05	0.17	5.88235	35.6699	209.823
HB	L-R_forelimbs	0.2	0.8	0.12	0.06	0.18	5.55556	37.0063	205.591		HB	L-R_hindlimbs	0.0555556	0.944444	0.11	0.08	0.19	5.26316	36.1878	190.462
HB	L-R_forelimbs	0.235294	0.764706	0.09	0.08	0.17	5.88235	15.1133	88.9016		HB	L-R_hindlimbs	0.0625	0.9375	0.11	0.08	0.19	5.26316	22.2314	117.008
HB	L-R_forelimbs	0.3	0.7	0.09	0.09	0.18	5.55556	19.1968	106.649		HB	L-R_hindlimbs	0.0555556	0.944444	0.1	0.09	0.19	5.26316	19.0471	100.248
HB	L-R_forelimbs	0.2	0.8	0.1	0.05	0.15	6.66667	29.7381	198.254		HB	L-R_hindlimbs	0.0714286	0.928571	0.08	0.06	0.14	7.14286	30.1268	215.191
HB	L-R_forelimbs	0.238095	0.761905	0.13	0.08	0.21	4.7619	34.2018	162.866		HB	L-R_hindlimbs	0.0555556	0.944444	0.1	0.08	0.18	5.55556	26.0128	144.516
HB	L-R_forelimbs	0.294118	0.705882	0.11	0.06	0.17	5.88235	24.5548	144.44		HB	L-R_hindlimbs	0.0555556	0.944444	0.11	0.07	0.18	5.55556	25.6448	142.471
HB	L-R_forelimbs	0.294118	0.705882	0.1	0.07	0.17	5.88235	46.0626	270.957		HB	L-R_hindlimbs	0.0555556	0.944444	0.11	0.07	0.18	5.55556	22.7721	126.511
HB	L-R_forelimbs	0.8	0.8	0.095	0.06	0.155	6.45161	21.2301	136.968		HB	L-R_hindlimbs	0.945946	0.945946	0.11	0.075	0.185	5.40541	22.152	119.74
HB	L-R_forelimbs	0.205882	0.794118	0.11	0.065	0.175	5.71429	25.3309	144.748		HB	L-R_hindlimbs	0.0606061	0.939394	0.115	0.065	0.18	5.55556	25.2184	140.102
HB	L-R_forelimbs	0.777778	0.777778	0.11	0.07	0.18	5.55556	21.5863	119.924		HB	L-R_hindlimbs	0.972973	0.972973	0.115	0.07	0.185	5.40541	20.7805	112.327
HB	L-R_forelimbs	0.243243	0.756757	0.125	0.06	0.185	5.40541	26.2488	141.886		HB	L-R_hindlimbs	0.0769231	0.923077	0.13	0.065	0.195	5.12821	29.3605	150.567
HB	L-R_forelimbs	0.257143	0.742857	0.11	0.065	0.175	5.71429	23.9667	136.952		HB	L-R_hindlimbs	0.027027	0.972973	0.12	0.065	0.185	5.40541	25.5123	137.904
HB	L-R_forelimbs	0.27027	0.72973	0.125	0.06	0.185	5.40541	22.0772	119.336		HB	L-R_hindlimbs	0.0810811	0.918919	0.105	0.08	0.185	5.40541	21.3099	115.189
HB	L-R_forelimbs	0.242424	0.757576	0.1	0.075	0.175	5.71429	18.7204	106.974		HB	L-R_hindlimbs	0.09375	0.90625	0.1	0.08	0.18	5.55556	23.2887	129.381
HB	L-R_forelimbs	0.222222	0.777778	0.1	0.04	0.14	7.14286	37.9393	270.995		HB	L-R_hindlimbs	0.0909091	0.909091	0.115	0.05	0.165	6.06061	43.673	264.685
HB	L-R_forelimbs	0.228571	0.771429	0.11	0.065	0.175	5.71429	30.2006	172.575		HB	L-R_hindlimbs	0.0882353	0.911765	0.11	0.06	0.17	5.88235	31.7005	186.474
HB	L-R_forelimbs	0.25641	0.74359	0.12	0.075	0.195	5.12821	19.793	101.502		HB	L-R_hindlimbs	0.0833333	0.916667	0.115	0.065	0.18	5.55556	29.1251	161.806
HB	L-R_forelimbs	0.257143	0.742857	0.11	0.065	0.175	5.71429	24.453	139.731		HB	L-R_hindlimbs	0.0588235	0.941176	0.11	0.06	0.17	5.88235	24.619	144.817
HB	L-R_forelimbs	0.205882	0.794118	0.11	0.06	0.17	5.88235	22.5448	132.616		HB	L-R_hindlimbs	0.0857143	0.914286	0.115	0.06	0.175	5.71429	22.3302	127.601
HB	L-R_forelimbs	0.793103	0.793103	0.09	0.055	0.145	6.89655	22.8617	157.667		HB	L-R_hindlimbs	0.909091	0.909091	0.1	0.06	0.16	6.25	23.2406	145.254
HB	L-R_forelimbs	0.72973	0.72973	0.115	0.07	0.185	5.40541	34.027	183.93		HB	L-R_hindlimbs	0.972222	0.972222	0.115	0.065	0.18	5.55556	34.3598	190.888
HB	L-R_forelimbs	0.78125	0.78125	0.1	0.06	0.16	6.25	26.1451	163.407		HB	L-R_hindlimbs	0.972222	0.972222	0.13	0.05	0.18	5.55556	25.7825	143.236
HB	L-R_forelimbs	0.783784	0.783784	0.115	0.07	0.185	5.40541	20.8856	112.895		HB	L-R_hindlimbs	0.947368	0.947368	0.115	0.075	0.19	5.26316	22.0964	116.297
HB	L-R_forelimbs	0.7	0.7	0.12	0.08	0.2	5	24.0129	120.065		HB	L-R_hindlimbs	0.95	0.95	0.125	0.075	0.2	5	35.3879	176.94
HB	L-R_forelimbs	0.736842	0.736842	0.125	0.065	0.19	5.26316	33.9761	178.822		HB	L-R_hindlimbs	0.947368	0.947368	0.12	0.07	0.19	5.26316	25.3865	133.613
HB	L-R_forelimbs	0.722222	0.722222	0.11	0.07	0.18	5.55556	26.9533	149.741		HB	L-R_hindlimbs	0.944444	0.944444	0.11	0.07	0.18	5.55556	25.5852	142.14
HB	L-R_forelimbs	0.722222	0.722222	0.1	0.08	0.18	5.55556	23.9144	132.858		HB	L-R_hindlimbs	0.902439	0.902439	0.125	0.08	0.205	4.87805	22.516	109.834
HB	L-R_forelimbs	0.74359	0.74359	0.11	0.085	0.195	5.12821	21.7392	111.483		HB	L-R_hindlimbs	0.974359	0.974359	0.115	0.08	0.195	5.12821	21.6504	111.028
HB	L-R_forelimbs	0.72093	0.72093	0.155	0.06	0.215	4.65116	39.6368	184.357		HB	L-R_hindlimbs	0.923077	0.923077	0.13	0.065	0.195	5.12821	29.478	151.169
HB	L-R_forelimbs	0.757576	0.757576	0.1	0.065	0.165	6.06061	25.5681	154.958		HB	L-R_hindlimbs	0.941176	0.941176	0.1	0.07	0.17	5.88235	23.3552	137.383
HB	L-R_forelimbs	0.205882	0.794118	0.11	0.06	0.17	5.88235	36.8612	216.831		HB	L-R_hindlimbs	0.0606061	0.939394	0.115	0.05	0.165	6.06061	38.6727	234.38
HB	L-R_forelimbs	0.266667	0.733333	0.09	0.06	0.15	6.66667	23.6184	157.456		HB	L-R_hindlimbs	0.0333333	0.966667	0.1	0.05	0.15	6.66667	22.5309	150.206
HB	L-R_forelimbs	0.258065	0.741935	0.095	0.06	0.155	6.45161	25.3103	163.292		HB	L-R_hindlimbs	0.0625	0.9375	0.11	0.05	0.16	6.25	26.0504	162.815
HB	L-R_forelimbs	0.758621	0.758621	0.085	0.06	0.145	6.89655	34.9277	240.88		HB	L-R_hindlimbs	0.9375	0.9375	0.11	0.05	0.16	6.25	38.766	242.287
HB	L-R_forelimbs	0.764706	0.764706	0.105	0.065	0.17	5.88235	29.3087	172.404		HB	L-R_hindlimbs	0.933333	0.933333	0.1	0.05	0.15	6.66667	24.5227	163.484
HB	L-R_forelimbs	0.785714	0.785714	0.08	0.06	0.14	7.14286	23.1273	165.195		HB	L-R_hindlimbs	0.96875	0.96875	0.105	0.055	0.16	6.25	28.9529	180.956
HB	L-R_forelimbs	0.735294	0.735294	0.1	0.07	0.17	5.88235	20.4272	120.16		HB	L-R_hindlimbs	0.9375	0.9375	0.095	0.065	0.16	6.25	21.8018	136.261
HB	L-R_forelimbs	0.216216	0.783784	0.1	0.085	0.185	5.40541	25.3831	137.206		HB	L-R_hindlimbs	0.0833333	0.916667	0.12	0.06	0.18	5.55556	27.8866	154.926
HB	L-R_forelimbs	0.285714	0.714286	0.105	0.07	0.175	5.71429	23.5909	134.805		HB	L-R_hindlimbs	0.0857143	0.914286	0.115	0.06	0.175	5.71429	24.2056	138.318
HB	L-R_forelimbs	0.225806	0.774194	0.11	0.05	0.16	6.25	27.4344	171.465		HB	L-R_hindlimbs	0.0909091	0.909091	0.125	0.04	0.165	6.06061	38.8501	235.455
HB	L-R_forelimbs	0.268293	0.731707	0.125	0.08	0.205	4.87805	23.0257	112.321		HB	L-R_hindlimbs	0.0606061	0.939394	0.09	0.075	0.165	6.06061	22.8672	138.589
HB	L-R_forelimbs	0.774194	0.774194	0.095	0.065	0.16	6.25	22.1527	138.454		HB	L-R_hindlimbs	0.0263158	0.973684	0.13	0.06	0.19	5.26316	26.5036	139.493
HB	L-R_forelimbs	0.783784	0.783784	0.115	0.07	0.185	5.40541	25.2749	136.621		HB	L-R_hindlimbs	0.972973	0.972973	0.125	0.06	0.185	5.40541	24.7372	133.714
HB	L-R_forelimbs	0.285714	0.714286	0.125	0.05	0.175	5.71429	38.7847	221.627		HB	L-R_hindlimbs	0.083333	0.916667	0.125	0.055	0.18	5.55556	40.0171	222.317
HB	L-R_forelimbs	0.290323	0.709677	0.1	0.055	0.155	6.45161	26.8278	173.083		HB	L-R_hindlimbs	0.03125	0.96875	0.105	0.055	0.16	6.25	27.0483	169.052
HB	L-R_forelimbs	0.257143	0.742857	0.115	0.06	0.175	5.71429	23.1033	132.019		HB	L-R_hindlimbs	0.057143	0.942857	0.11	0.065	0.175	5.71429	24.9407	142.518
HB	L-R_forelimbs	0.264706	0.735294	0.115	0.055	0.17	5.88235	23.6352	139.031		HB	L-R_hindlimbs	0.057143	0.942857	0.115	0.06	0.175	5.71429	25.3617	144.924
HB	L-R_forelimbs	0.235294	0.764706	0.115	0.055	0.17	5.88235	26.6311	156.653		HB	L-R_hindlimbs	0.030303	0.969697	0.11	0.055	0.165	6.06061	26.0693	157.996
HB	L-R_forelimbs	0.789474	0.789474	0.095	0.06	0.155	6.45161	24.2819	156.657		HB	L-R_hindlimbs	0.027778	0.972222	0.12	0.06	0.18	5.55556	27.1891	151.051
HB	L-R_forelimbs	0.775	0.775	0.105	0.07	0.175	5.71429	23.0711	131.835		HB	L-R_hindlimbs	0.923077	0.923077	0.125	0.07	0.195	5.12821	25.0892	128.663
HB	L-R_forelimbs	0.711111	0.711111	0.15	0.075	0.225	4.44444	27.058	120.258		HB	L-R_hindlimbs	0.948718	0.948718	0.125	0.07	0.195	5.12821	27.0845	138.895
HB	L-R_forelimbs	0.757576	0.757576	0.105	0.06	0.165	6.06061	27.0365	163.858		HB	L-R_hindlimbs	0.918919	0.918919	0.125	0.06	0.185	5.40541	32.7412	176.979
HB	L-R_forelimbs	0.766667	0.766667	0.085	0.06	0.145	6.89655	27.958	192.814		HB	L-R_hindlimbs	0.969697	0.969697	0.105	0.05	0.155	6.45161	28.6527	184.856
FB	L-R_forelimbs	1	1	0.11	0.05	0.16	6.25	29.6024	185.015		FB	L-R_hindlimbs	1	1	0.11	0.05	0.16	6.25	29.5302	184.564
FB	L-R_forelimbs	0	1	0.1	0.04	0.14	7.14286	39.1306	279.504		FB	L-R_hindlimbs	0	1	0.1	0.05	0.15	6.66667	36.0351	240.234
FB	L-R_forelimbs	0	1	0.11	0.04	0.15	6.66667	35.0525	233.683		FB	L-R_hindlimbs	0	1	0.11	0.05	0.16	6.25	35.9827	224.892
FB	L-R_forelimbs	0	1	0.12	0.04	0.16	6.25	31.402	196.263		FB	L-R_hindlimbs	0	1	0.1	0.06	0.16	6.25	30.7767	192.354
FB	L-R_forelimbs	0	1	0.07	0.04	0.11	9.09091	31.4197	285.634		FB	L-R_hindlimbs	0	1	0.1	0.04	0.14	7.14286	33.0433	236.023
FB	L-R_forelimbs	0	1	0.1	0.04	0.14	7.14286	34.4081	245.772		FB	L-R_hindlimbs	0	1	0.1	0.04	0.14	7.14286	33.7399	240.999
FB	L-R_forelimbs	0	1	0.09	0.04	0.13	7.69231	31.4916	242.243		FB	L-R_hindlimbs	0	1	0.1	0.05	0.15	6.66667	32.6886	217.924
FB	L-R_forelimbs	0	1	0.1	0.04	0.14	7.14286	34.868	249.057		FB	L-R_hindlimbs	0	1	0.09	0.05	0.14	7.14286	33.9464	242.474
FB	L-R_forelimbs	0	1	0.09	0.05	0.14	7.14286	29.9583	213.988		FB	L-R_hindlimbs	0	1	0.1	0.06	0.16	6.25	27.2176	170.11
FB	L-R_forelimbs	0.0588235	0.941176	0.11	0.06	0.17	5.88235	29.4154	173.032		FB	L-R_hindlimbs	1	1	0.1	0.06	0.16	6.25	27.2274	170.171
FB	L-R_forelimbs	0.0666667	0.933333	0.11	0.04	0.15	6.66667	31.4584	209.722		FB	L-R_hindlimbs	0	1	0.1	0.05	0.15	6.66667	31.7541	211.694
FB	L-R_forelimbs	0.0666667	0.933333	0.08	0.05	0.13	7.69231	22.9239	176.338		FB	L-R_hindlimbs	0	1	0.11	0.05	0.16	6.25	24.7363	154.602
FB	L-R_forelimbs	0.0625	0.9375	0.09	0.05	0.14	7.14286	37.2627	266.162		FB	L-R_hindlimbs	0	1	0.1	0.06	0.16	6.25	33.3305	208.316
FB	L-R_forelimbs	0.0625	0.9375	0.15	0.04	0.19	5.26316	33.7912	177.848		FB	L-R_hindlimbs	0	1	0.12	0.06	0.18	5.55556	33.9915	188.842
FB	L-R_forelimbs	0.0555556	0.944444	0.09	0.05	0.14	7.14286	39.1501	279.643		FB	L-R_hindlimbs	0	1	0.1	0.06	0.16	6.25	37.6704	235.44
FB	L-R_forelimbs	0.1	0.9	0.15	0.05	0.2	5	25.2019	126.01		FB	L-R_hindlimbs	0	1	0.11	0.05	0.16	6.25	29.0775	181.734
FB	L-R_forelimbs	0.1	0.9	0.1	0.03	0.13	7.69231	31.6412	243.394		FB	L-R_hindlimbs	0	1	0.12	0.04	0.16	6.25	36.8565	230.353
FB	L-R_forelimbs	0.0714286	0.928571	0.11	0.03	0.14	7.14286	33.495	239.25		FB	L-R_hindlimbs	0	1	0.09	0.04	0.13	7.69231	36.1675	278.211
FB	L-R_forelimbs	0.0833333	0.916667	0.08	0.04	0.12	8.33333	36.6687	305.572		FB	L-R_hindlimbs	0	1	0.1	0.03	0.13	7.69231	35.284	271.415
FB	L-R_forelimbs	0.0833333	0.916667	0.09	0.03	0.12	8.33333	33.403	278.358		FB	L-R_hindlimbs	0	1	0.09	0.03	0.12	8.33333	25.5112	212.593
FB	L-R_forelimbs	0.0714286	0.928571	0.1	0.04	0.14	7.14286	35.017	250.122		FB	L-R_hindlimbs	0	1	0.1	0.04	0.14	7.14286	32.5536	232.526
FB	L-R_forelimbs	0.0625	0.9375	0.11	0.05	0.16	6.25	31.1584	194.74		FB	L-R_hindlimbs	0	1	0.11	0.05	0.16	6.25	33.2841	208.026
FB	L-R_forelimbs	0.0714286	0.928571	0.12	0.03	0.15	6.66667	31.1575	207.717		FB	L-R_hindlimbs	0	1	0.12	0.05	0.17	5.88235	36.1797	212.822
FB	L-R_forelimbs	0.0714286	0.928571	0.1	0.03	0.13	7.69231	30.933	237.946		FB	L-R_hindlimbs	0	1	0.1	0.04	0.14	7.14286	31.9125	227.946
FB	L-R_forelimbs	0.0714286	0.928571	0.1	0.04	0.14	7.14286	31.7901	227.072		FB	L-R_hindlimbs	0	1	0.11	0.04	0.15	6.66667	32.1686	214.458
FB	L-R_forelimbs	0.0714286	0.928571	0.11	0.05	0.16	6.25	32.949	205.931		FB	L-R_hindlimbs	0	1	0.11	0.06	0.17	5.88235	31.2529	183.841
FB	L-R_forelimbs	0.923077	0.923077	0.135	0.06	0.195	5.12821	27.5441	141.252		FB	L-R_hindlimbs	1	1	0.12	0.065	0.185	5.40541	28.9514	156.494
FB	L-R_forelimbs	0.90625	0.90625	0.105	0.055	0.16	6.25	27.6515	172.822		FB	L-R_hindlimbs	1	1	0.11	0.06	0.17	5.88235	28.8979	169.988
FB	L-R_forelimbs	0.90625	0.90625	0.105	0.055	0.16	6.25	19.8419	124.012		FB	L-R_hindlimbs	1	1	0.105	0.075	0.18	5.55556	20.2806	112.67
FB	L-R_forelimbs	0.90566	0.90566	0.185	0.08	0.265	3.77358	39.8316	150.308		FB	L-R_hindlimbs	1	1	0.15	0.085	0.235	4.25532	39.8995	169.785
FB	L-R_forelimbs	0.947368	0.947368	0.08	0.06	0.14	7.14286	22.7735	162.668		FB	L-R_hindlimbs	1	1	0.1	0.07	0.17	5.88235	27.0624	159.191
FB	L-R_forelimbs	0.0263158	0.973684	0.125	0.065	0.19	5.26316	28.1871	148.353		FB	L-R_hindlimbs	1	1	0.11	0.07	0.18	5.55556	27.9271	155.15
FB	L-R_forelimbs	0.909091	0.909091	0.115	0.055	0.17	5.88235	29.1576	171.515		FB	L-R_hindlimbs	1	1	0.12	0.065	0.185	5.40541	31.5756	170.679
FB	L-R_forelimbs	0.0769231	0.923077	0.12	0.065	0.185	5.40541	25.3694	137.132		FB	L-R_hindlimbs	1	1	0.12	0.08	0.2	5	25.5164	127.582
FB	L-R_forelimbs	0.0967742	0.903226	0.105	0.035	0.14	7.14286	32.9295	235.211		FB	L-R_hindlimbs	0	1	0.11	0.045	0.155	6.45161	45.2651	292.033
FB	L-R_forelimbs	0.0740741	0.925926	0.125	0.03	0.155	6.45161	44.5229	287.245		FB	L-R_hindlimbs	0	1	0.11	0.045	0.155	6.45161	37.9164	244.622
FB	L-R_forelimbs	0.027027	0.972973	0.12	0.035	0.155	6.45161	47.2877	305.082		FB	L-R_hindlimbs	0	1	0.13	0.05	0.18	5.55556	43.9605	244.225
FB	L-R_forelimbs	0.0645161	0.935484	0.095	0.03	0.125	8	30.9673	247.738		FB	L-R_hindlimbs	0	1	0.12	0.04	0.16	6.25	48.7986	304.991
FB	L-R_forelimbs	0.0740741	0.925926	0.11	0.035	0.145	6.89655	41.4218	285.668		FB	L-R_hindlimbs	0	1	0.11	0.045	0.155	6.45161	44.2044	285.19
FB	L-R_forelimbs	0.0512821	0.948718	0.09	0.035	0.125	8	31.2005	249.604		FB	L-R_hindlimbs	0	1	0.11	0.04	0.15	6.66667	36.2078	241.385
FB	L-R_forelimbs	0.0344828	0.965517	0.11	0.04	0.15	6.66667	30.4069	202.713		FB	L-R_hindlimbs	0	1	0.105	0.045	0.15	6.66667	28.7049	191.366
FB	L-R_forelimbs	0.0666667	0.933333	0.085	0.045	0.13	7.69231	28.0779	215.983		FB	L-R_hindlimbs	0	1	0.1	0.05	0.15	6.66667	29.2737	195.158
FB	L-R_forelimbs	0.1	0.9	0.145	0.055	0.2	5	32.1424	160.712		FB	L-R_hindlimbs	0	1	0.12	0.055	0.175	5.71429	29.7686	170.106
FB	L-R_forelimbs	0.0666667	0.933333	0.1	0.05	0.15	6.66667	30.5658	203.772		FB	L-R_hindlimbs	1	1	0.105	0.05	0.155	6.45161	29.3892	189.608
FB	L-R_forelimbs	0.935484	0.935484	0.115	0.05	0.165	6.06061	44.2976	268.47		FB	L-R_hindlimbs	1	1	0.135	0.055	0.19	5.26316	36.3956	191.556
FB	L-R_forelimbs	0.972973	0.972973	0.125	0.06	0.185	5.40541	27.7543	150.023		FB	L-R_hindlimbs	1	1	0.115	0.06	0.175	5.71429	26.9541	154.023
FB	L-R_forelimbs	0.0243902	0.97561	0.14	0.045	0.185	5.40541	50.2679	271.719		FB	L-R_hindlimbs	1	1	0.145	0.04	0.185	5.40541	51.508	278.421
FB	L-R_forelimbs	0.928571	0.928571	0.095	0.045	0.14	7.14286	31.7229	226.592		FB	L-R_hindlimbs	1	1	0.12	0.045	0.165	6.06061	35.2951	213.91
FB	L-R_forelimbs	0	1	0.1	0.06	0.16	6.25	32.8718	205.449		FB	L-R_hindlimbs	0.0588235	0.941176	0.09	0.08	0.17	5.88235	26.9887	158.757
FB	L-R_forelimbs	0	1	0.12	0.04	0.16	6.25	39.8231	248.895		FB	L-R_hindlimbs	0.0666667	0.933333	0.11	0.04	0.15	6.66667	39.3928	262.619
FB	L-R_forelimbs	0	1	0.08	0.06	0.14	7.14286	33.9291	242.351		FB	L-R_hindlimbs	0.0588235	0.941176	0.11	0.05	0.16	6.25	29.5485	184.678
FB	L-R_forelimbs	0	1	0.07	0.045	0.115	8.69565	22.9041	199.166		FB	L-R_hindlimbs	0.0357143	0.964286	0.11	0.04	0.15	6.66667	32.1733	214.489
FB	L-R_forelimbs	0.0625	0.9375	0.09	0.07	0.16	6.25	24.2964	151.852		FB	L-R_hindlimbs	0.0666667	0.933333	0.09	0.06	0.15	6.66667	31.5977	210.651
FB	L-R_forelimbs	0.0526316	0.947368	0.1	0.05	0.15	6.66667	28.3386	188.924		FB	L-R_hindlimbs	0.0625	0.9375	0.1	0.06	0.16	6.25	29.1876	182.423
FB	L-R_forelimbs	0.0588235	0.941176	0.1	0.04	0.14	7.14286	41.0293	293.066		FB	L-R_hindlimbs	0.0588235	0.941176	0.1	0.06	0.16	6.25	33.6352	210.22
FB	L-R_forelimbs	0.05	0.95	0.12	0.07	0.19	5.26316	27.4975	144.724		FB	L-R_hindlimbs	0.05	0.95	0.09	0.08	0.17	5.88235	41.6973	245.278
FB	L-R_forelimbs	0.0625	0.9375	0.09	0.05	0.14	7.14286	28.7606	205.433		FB	L-R_hindlimbs	0.0625	0.9375	0.11	0.05	0.16	6.25	28.6958	179.349
FB	L-R_forelimbs	0.0714286	0.928571	0.1	0.04	0.14	7.14286	31.7521	226.801		FB	L-R_hindlimbs	0.0666667	0.933333	0.09	0.05	0.14	7.14286	30.8534	220.381
FB	L-R_forelimbs	0.0526316	0.947368	0.11	0.06	0.17	5.88235	27.4617	161.54		FB	L-R_hindlimbs	0.0555556	0.944444	0.11	0.06	0.17	5.88235	29.284	172.259
FB	L-R_forelimbs	0.945946	0.945946	0.115	0.07	0.185	5.40541	22.6052	122.19		FB	L-R_hindlimbs	0.0555556	0.944444	0.11	0.07	0.18	5.55556	22.9483	127.49
FB	L-R_forelimbs	0.916667	0.916667	0.11	0.07	0.18	5.55556	20.8739	115.966		FB	L-R_hindlimbs	0.974359	0.974359	0.115	0.08	0.195	5.12821	20.9321	107.344
FB	L-R_forelimbs	0.0810811	0.918919	0.13	0.055	0.185	5.40541	35.2127	190.339		FB	L-R_hindlimbs	0.0277778	0.972222	0.115	0.065	0.18	5.55556	36.4935	202.741
FB	L-R_forelimbs	0.08	0.92	0.1	0.035	0.135	7.40741	31.322	232.015		FB	L-R_hindlimbs	0.0333333	0.966667	0.1	0.045	0.145	6.89655	30.4912	210.284
FB	L-R_forelimbs	0.0740741	0.925926	0.095	0.04	0.135	7.40741	31.7253	235.002		FB	L-R_hindlimbs	0.0625	0.9375	0.105	0.035	0.14	7.14286	35.0263	250.188
FB	L-R_forelimbs	0.1	0.9	0.08	0.045	0.125	8	25.235	201.88		FB	L-R_hindlimbs	0.0333333	0.966667	0.09	0.05	0.14	7.14286	22.5317	160.941
FB	L-R_forelimbs	0.0645161	0.935484	0.095	0.05	0.145	6.89655	23.3021	160.704		FB	L-R_hindlimbs	0.030303	0.969697	0.1	0.06	0.16	6.25	22.2291	138.932
FB	L-R_forelimbs	0.0882353	0.911765	0.11	0.06	0.17	5.88235	26.7378	157.281		FB	L-R_hindlimbs	0.0294118	0.970588	0.115	0.055	0.17	5.88235	28.6675	168.632
FB	L-R_forelimbs	0.0967742	0.903226	0.095	0.06	0.155	6.45161	22.5427	145.437		FB	L-R_hindlimbs	0.0285714	0.971429	0.105	0.065	0.17	5.88235	20.0896	118.174
FB	L-R_forelimbs	0.0333333	0.966667	0.1	0.05	0.15	6.66667	39.473	263.153		FB	L-R_hindlimbs	0.966667	0.966667	0.095	0.055	0.15	6.66667	39.8632	265.755
FB	L-R_forelimbs	0.909091	0.909091	0.115	0.05	0.165	6.06061	42.5376	257.804		FB	L-R_hindlimbs	0.969697	0.969697	0.115	0.045	0.16	6.25	42.414	265.088
FB	L-R_forelimbs	0.0606061	0.939394	0.095	0.05	0.145	6.89655	31.2086	215.232		FB	L-R_hindlimbs	0.030303	0.969697	0.11	0.055	0.165	6.06061	31.1036	188.507
FB	L-R_forelimbs	0.05	0.95	0.14	0.06	0.2	5	27.209	136.045		FB	L-R_hindlimbs	0.0526316	0.947368	0.13	0.06	0.19	5.26316	26.0596	137.156
FB	L-R_forelimbs	0.90625	0.90625	0.14	0.075	0.215	4.65116	20.0468	93.241		FB	L-R_hindlimbs	0.0238095	0.97619	0.125	0.085	0.21	4.7619	21.6826	103.251
FB	L-R_forelimbs	0.9	0.9	0.135	0.065	0.2	5	30.753	153.765		FB	L-R_hindlimbs	0.0526316	0.947368	0.1	0.05	0.15	6.66667	27.0049	180.033
FB	L-R_forelimbs	0.075	0.925	0.11	0.055	0.165	6.06061	25.3333	153.535		FB	L-R_hindlimbs	0.947368	0.947368	0.135	0.055	0.19	5.26316	30.5332	160.701
FB	L-R_forelimbs	0.069767	0.930233	0.12	0.06	0.18	5.55556	27.317	151.761		FB	L-R_hindlimbs	0.972973	0.972973	0.12	0.065	0.185	5.40541	26.6375	143.986
FB	L-R_forelimbs	0.909091	0.909091	0.135	0.06	0.195	5.12821	35.0835	179.915		FB	L-R_hindlimbs	0.03125	0.96875	0.105	0.055	0.16	6.25	23.5829	147.393
FB	L-R_forelimbs	0.941176	0.941176	0.105	0.065	0.17	5.88235	21.8509	128.535		FB	L-R_hindlimbs	0.947368	0.947368	0.11	0.075	0.185	5.40541	23.5139	127.102
FB	L-R_forelimbs	0.0833333	0.916667	0.1	0.05	0.15	6.66667	29.4106	196.071		FB	L-R_hindlimbs	0.0606061	0.939394	0.12	0.045	0.165	6.06061	32.1941	195.116
FB	L-R_forelimbs	0.916667	0.916667	0.13	0.05	0.18	5.55556	29.2572	162.54		FB	L-R_hindlimbs	0.0857143	0.914286	0.12	0.055	0.175	5.71429	26.4216	150.981
FB	L-R_forelimbs	0.903226	0.903226	0.105	0.05	0.155	6.45161	26.7192	172.382		FB	L-R_hindlimbs	0.0322581	0.967742	0.1	0.055	0.155	6.45161	24.8473	160.305
