# Supplementary material for: Long ascending propriospinal neurons provide flexible, context-specific control of interlimb coordination
Source: eLife. 2020 Sep 9;9:e53565. doi: 10.7554/eLife.53565 (PMC7527236; doi:10.7554/eLife.53565)
Supplement: Figure 4—source data 2. [file elife-53565-fig4-data2.xlsx]

## Sheet: L-R_forelimbs
Time_ID	Animal_ID	Limb_ID	rawPhase	Deg	ref_r-FL_strideFreq(Hz)
Con	1	L-R_forelimbs	0.470588	169.412	2.94118
Con	1	L-R_forelimbs	0.485714	174.857	2.85714
Con	1	L-R_forelimbs	0.529412	190.588	2.94118
Con	1	L-R_forelimbs	0.5	180	2.94118
Con	1	L-R_forelimbs	0.425	153	2.5
Con	1	L-R_forelimbs	0.516129	185.806	3.22581
Con	1	L-R_forelimbs	0.428571	154.286	3.57143
Con	1	L-R_forelimbs	0.481481	173.333	3.7037
Con	1	L-R_forelimbs	0.571429	205.714	2.85714
Con	1	L-R_forelimbs	0.482759	173.793	3.44828
Con	2	L-R_forelimbs	0.515152	185.455	3.0303
Con	2	L-R_forelimbs	0.470588	169.412	2.94118
Con	2	L-R_forelimbs	0.515152	185.455	3.0303
Con	2	L-R_forelimbs	0.482759	173.793	3.44828
Con	2	L-R_forelimbs	0.466667	168	3.33333
Con	2	L-R_forelimbs	0.538462	193.846	3.84615
Con	2	L-R_forelimbs	0.44	158.4	4
Con	2	L-R_forelimbs	0.5	180	4.54545
Con	2	L-R_forelimbs	0.4375	157.5	3.125
Con	7	L-R_forelimbs	0.485714	174.857	2.85714
Con	7	L-R_forelimbs	0.517241	186.207	3.44828
Con	7	L-R_forelimbs	0.576923	207.692	3.84615
Con	7	L-R_forelimbs	0.545455	196.364	4.54545
Con	7	L-R_forelimbs	0.545455	196.364	4.54545
Con	7	L-R_forelimbs	0.541667	195	4.16667
Con	7	L-R_forelimbs	0.4	144	5
Con	8	L-R_forelimbs	0.533333	192	3.33333
Con	8	L-R_forelimbs	0.566667	204	3.33333
Con	8	L-R_forelimbs	0.444444	160	3.7037
Con	8	L-R_forelimbs	0.6	216	2.85714
Con	8	L-R_forelimbs	0.545455	196.364	4.54545
Con	9	L-R_forelimbs	0.411765	148.235	2.94118
Con	9	L-R_forelimbs	0.571429	205.714	3.57143
Con	9	L-R_forelimbs	0.586207	211.034	3.44828
Con	9	L-R_forelimbs	0.576923	207.692	3.84615
Con	9	L-R_forelimbs	0.527778	190	2.77778
Con	9	L-R_forelimbs	0.551724	198.621	3.44828
Con	9	L-R_forelimbs	0.454545	163.636	4.54545
Con	9	L-R_forelimbs	0.5	180	3.84615
Con	10	L-R_forelimbs	0.464286	167.143	3.57143
Con	10	L-R_forelimbs	0.517241	186.207	3.44828
Con	10	L-R_forelimbs	0.481481	173.333	3.7037
Con	10	L-R_forelimbs	0.464286	167.143	3.57143
Con	10	L-R_forelimbs	0.47619	171.429	4.7619
Con	10	L-R_forelimbs	0.52	187.2	4
Con	10	L-R_forelimbs	0.5	180	4.16667
Con	12	L-R_forelimbs	0.483871	174.194	3.22581
Con	12	L-R_forelimbs	0.457143	164.571	2.85714
Con	12	L-R_forelimbs	0.466667	168	3.33333
Con	12	L-R_forelimbs	0.5	180	3.125
Con	12	L-R_forelimbs	0.46875	168.75	3.125
Con	12	L-R_forelimbs	0.5	180	4.16667
Con	12	L-R_forelimbs	0.454545	163.636	4.54545
Con	12	L-R_forelimbs	0.518519	186.667	3.7037
Con	12	L-R_forelimbs	0.405405	145.946	2.7027
Con	12	L-R_forelimbs	0.5	180	3.84615
Con	12	L-R_forelimbs	0.5	180	3.33333
Con	12	L-R_forelimbs	0.5	180	4.16667
Con	13	L-R_forelimbs	0.470588	169.412	2.94118
Con	13	L-R_forelimbs	0.483871	174.194	3.22581
Con	13	L-R_forelimbs	0.5	180	3.57143
Con	13	L-R_forelimbs	0.481481	173.333	3.7037
Con	13	L-R_forelimbs	0.565217	203.478	4.34783
Con	13	L-R_forelimbs	0.541667	195	4.16667
Con	13	L-R_forelimbs	0.478261	172.174	4.34783
Con	13	L-R_forelimbs	0.52381	188.571	4.7619
Con	13	L-R_forelimbs	0.538462	193.846	3.84615
Con	13	L-R_forelimbs	0.444444	160	3.7037
Con	13	L-R_forelimbs	0.555556	200	3.7037
Con	13	L-R_forelimbs	0.52	187.2	4
Con	14	L-R_forelimbs	0.52381	188.571	2.38095
Con	14	L-R_forelimbs	0.47619	171.429	2.38095
Con	14	L-R_forelimbs	0.548387	197.419	3.22581
Con	14	L-R_forelimbs	0.571429	205.714	3.57143
Con	14	L-R_forelimbs	0.454545	163.636	4.54545
Con	14	L-R_forelimbs	0.5	180	4.54545
Con	14	L-R_forelimbs	0.533333	192	3.33333
Con	14	L-R_forelimbs	0.47619	171.429	4.7619
Con	14	L-R_forelimbs	0.48	172.8	4
Con	14	L-R_forelimbs	0.52381	188.571	4.7619
Con	15	L-R_forelimbs	0.484848	174.545	3.0303
Con	15	L-R_forelimbs	0.484848	174.545	3.0303
Con	15	L-R_forelimbs	0.464286	167.143	3.57143
Con	15	L-R_forelimbs	0.518519	186.667	3.7037
Con	15	L-R_forelimbs	0.5625	202.5	3.125
Con	15	L-R_forelimbs	0.5	180	3.84615
Con	15	L-R_forelimbs	0.521739	187.826	4.34783
Con	15	L-R_forelimbs	0.466667	168	3.33333
Con	15	L-R_forelimbs	0.487179	175.385	2.5641
Con	16	L-R_forelimbs	0.5	180	4.16667
Con	16	L-R_forelimbs	0.481481	173.333	3.7037
Con	16	L-R_forelimbs	0.538462	193.846	3.84615
Con	16	L-R_forelimbs	0.590909	212.727	4.54545
Con	16	L-R_forelimbs	0.545455	196.364	4.54545
Con	16	L-R_forelimbs	0.576923	207.692	3.84615
Con	16	L-R_forelimbs	0.5625	202.5	3.125
Con	16	L-R_forelimbs	0.545455	196.364	3.0303
Con	16	L-R_forelimbs	0.536585	193.171	2.43902
Con	16	L-R_forelimbs	0.435897	156.923	2.5641
Con	16	L-R_forelimbs	0.571429	205.714	4.7619
Con	17	L-R_forelimbs	0.487805	175.61	2.43902
Con	17	L-R_forelimbs	0.5	180	2.63158
Con	17	L-R_forelimbs	0.484848	174.545	3.0303
Con	17	L-R_forelimbs	0.5	180	3.57143
Con	17	L-R_forelimbs	0.535714	192.857	3.57143
Con	17	L-R_forelimbs	0.5	180	3.57143
Con	17	L-R_forelimbs	0.52	187.2	4
Con	17	L-R_forelimbs	0.485714	174.857	2.85714
Con	17	L-R_forelimbs	0.46875	168.75	3.125
Con	18	L-R_forelimbs	0.5	180	3.57143
Con	18	L-R_forelimbs	0.448276	161.379	3.44828
Con	18	L-R_forelimbs	0.481481	173.333	3.7037
Con	18	L-R_forelimbs	0.44	158.4	4
Con	18	L-R_forelimbs	0.538462	193.846	3.84615
Con	18	L-R_forelimbs	0.461538	166.154	3.84615
Con	18	L-R_forelimbs	0.384615	138.462	3.84615
Con	18	L-R_forelimbs	0.458333	165	4.16667
Con	18	L-R_forelimbs	0.517241	186.207	3.44828
Con	18	L-R_forelimbs	0.458333	165	4.16667
Con	18	L-R_forelimbs	0.481481	173.333	3.7037
Con	1	L-R_forelimbs	0.484848	174.545	3.0303
Con	1	L-R_forelimbs	0.454545	163.636	3.0303
Con	1	L-R_forelimbs	0.605263	217.895	2.63158
Con	1	L-R_forelimbs	0.535714	192.857	3.57143
Con	1	L-R_forelimbs	0.516129	185.806	3.22581
Con	1	L-R_forelimbs	0.5	180	3.57143
Con	2	L-R_forelimbs	0.470588	169.412	2.94118
Con	2	L-R_forelimbs	0.484848	174.545	3.0303
Con	2	L-R_forelimbs	0.45	162	2.5
Con	2	L-R_forelimbs	0.513514	184.865	2.7027
Con	2	L-R_forelimbs	0.482759	173.793	3.44828
Con	2	L-R_forelimbs	0.535714	192.857	3.57143
Con	7	L-R_forelimbs	0.542857	195.429	2.85714
Con	7	L-R_forelimbs	0.482759	173.793	3.44828
Con	7	L-R_forelimbs	0.560976	201.951	2.43902
Con	7	L-R_forelimbs	0.64	230.4	4
Con	7	L-R_forelimbs	0.56	201.6	4
Con	7	L-R_forelimbs	0.518519	186.667	3.7037
Con	7	L-R_forelimbs	0.517241	186.207	3.44828
Con	7	L-R_forelimbs	0.555556	200	3.7037
Con	7	L-R_forelimbs	0.535714	192.857	3.57143
Con	7	L-R_forelimbs	0.387097	139.355	3.22581
Con	7	L-R_forelimbs	0.5	180	3.84615
Con	8	L-R_forelimbs	0.405405	145.946	2.7027
Con	8	L-R_forelimbs	0.606061	218.182	3.0303
Con	8	L-R_forelimbs	0.5	180	2.94118
Con	8	L-R_forelimbs	0.555556	200	3.7037
Con	8	L-R_forelimbs	0.5	180	3.33333
Con	9	L-R_forelimbs	0.481481	173.333	3.7037
Con	9	L-R_forelimbs	0.535714	192.857	3.57143
Con	9	L-R_forelimbs	0.464286	167.143	3.57143
Con	9	L-R_forelimbs	0.516129	185.806	3.22581
Con	9	L-R_forelimbs	0.517241	186.207	3.44828
Con	9	L-R_forelimbs	0.481481	173.333	3.7037
Con	9	L-R_forelimbs	0.53125	191.25	3.125
Con	10	L-R_forelimbs	0.5	180	3.57143
Con	10	L-R_forelimbs	0.52	187.2	4
Con	10	L-R_forelimbs	0.590909	212.727	4.54545
Con	10	L-R_forelimbs	0.454545	163.636	4.54545
Con	10	L-R_forelimbs	0.482759	173.793	3.44828
Con	10	L-R_forelimbs	0.5	180	3.84615
Con	10	L-R_forelimbs	0.448276	161.379	3.44828
Con	10	L-R_forelimbs	0.517241	186.207	3.44828
Con	10	L-R_forelimbs	0.583333	210	4.16667
Con	10	L-R_forelimbs	0.576923	207.692	3.84615
Con	10	L-R_forelimbs	0.571429	205.714	4.7619
Con	12	L-R_forelimbs	0.464286	167.143	3.57143
Con	12	L-R_forelimbs	0.535714	192.857	3.57143
Con	12	L-R_forelimbs	0.44	158.4	4
Con	12	L-R_forelimbs	0.521739	187.826	4.34783
Con	12	L-R_forelimbs	0.409091	147.273	4.54545
Con	12	L-R_forelimbs	0.541667	195	4.16667
Con	12	L-R_forelimbs	0.419355	150.968	3.22581
Con	12	L-R_forelimbs	0.517241	186.207	3.44828
Con	12	L-R_forelimbs	0.5	180	2.94118
Con	12	L-R_forelimbs	0.564103	203.077	2.5641
Con	12	L-R_forelimbs	0.375	135	3.125
Con	12	L-R_forelimbs	0.454545	163.636	4.54545
Con	13	L-R_forelimbs	0.527778	190	2.77778
Con	13	L-R_forelimbs	0.5	180	2.77778
Con	13	L-R_forelimbs	0.466667	168	3.33333
Con	13	L-R_forelimbs	0.617647	222.353	2.94118
Con	13	L-R_forelimbs	0.565217	203.478	4.34783
Con	13	L-R_forelimbs	0.636364	229.091	4.54545
Con	13	L-R_forelimbs	0.551724	198.621	3.44828
Con	13	L-R_forelimbs	0.5	180	3.84615
Con	13	L-R_forelimbs	0.588235	211.765	2.94118
Con	14	L-R_forelimbs	0.46875	168.75	3.125
Con	14	L-R_forelimbs	0.5	180	3.57143
Con	14	L-R_forelimbs	0.464286	167.143	3.57143
Con	14	L-R_forelimbs	0.5	180	3.33333
Con	14	L-R_forelimbs	0.37931	136.552	3.44828
Con	14	L-R_forelimbs	0.444444	160	3.7037
Con	14	L-R_forelimbs	0.458333	165	4.16667
Con	14	L-R_forelimbs	0.5	180	3.84615
Con	15	L-R_forelimbs	0.583333	210	2.77778
Con	15	L-R_forelimbs	0.542857	195.429	2.85714
Con	15	L-R_forelimbs	0.515152	185.455	3.0303
Con	15	L-R_forelimbs	0.482759	173.793	3.44828
Con	15	L-R_forelimbs	0.5	180	3.125
Con	15	L-R_forelimbs	0.478261	172.174	4.34783
Con	15	L-R_forelimbs	0.478261	172.174	4.34783
Con	15	L-R_forelimbs	0.361111	130	2.77778
Con	15	L-R_forelimbs	0.5	180	4.16667
Con	16	L-R_forelimbs	0.551724	198.621	3.44828
Con	16	L-R_forelimbs	0.518519	186.667	3.7037
Con	16	L-R_forelimbs	0.481481	173.333	3.7037
Con	16	L-R_forelimbs	0.521739	187.826	4.34783
Con	16	L-R_forelimbs	0.545455	196.364	4.54545
Con	16	L-R_forelimbs	0.458333	165	4.16667
Con	16	L-R_forelimbs	0.515152	185.455	3.0303
Con	16	L-R_forelimbs	0.541667	195	4.16667
Con	16	L-R_forelimbs	0.5625	202.5	3.125
Con	16	L-R_forelimbs	0.444444	160	2.77778
Con	16	L-R_forelimbs	0.394737	142.105	2.63158
Con	16	L-R_forelimbs	0.372093	133.953	2.32558
Con	17	L-R_forelimbs	0.484848	174.545	3.0303
Con	17	L-R_forelimbs	0.470588	169.412	2.94118
Con	17	L-R_forelimbs	0.483871	174.194	3.22581
Con	17	L-R_forelimbs	0.428571	154.286	2.85714
Con	17	L-R_forelimbs	0.487179	175.385	2.5641
Con	17	L-R_forelimbs	0.484848	174.545	3.0303
Con	17	L-R_forelimbs	0.555556	200	2.22222
Con	17	L-R_forelimbs	0.518519	186.667	3.7037
Con	17	L-R_forelimbs	0.555556	200	3.7037
Con	17	L-R_forelimbs	0.657895	236.842	2.63158
Con	17	L-R_forelimbs	0.5	180	3.33333
Con	17	L-R_forelimbs	0.555556	200	2.77778
Con	18	L-R_forelimbs	0.517241	186.207	3.44828
Con	18	L-R_forelimbs	0.470588	169.412	2.94118
Con	18	L-R_forelimbs	0.5	180	2.63158
Con	18	L-R_forelimbs	0.371429	133.714	2.85714
Con	18	L-R_forelimbs	0.5	180	3.84615
Con	18	L-R_forelimbs	0.464286	167.143	3.57143
Con	18	L-R_forelimbs	0.454545	163.636	4.54545
Con	18	L-R_forelimbs	0.47619	171.429	4.7619
Con	18	L-R_forelimbs	0.454545	163.636	4.54545
Con	18	L-R_forelimbs	0.6	216	4
Con	18	L-R_forelimbs	0.48	172.8	4
Con	18	L-R_forelimbs	0.47619	171.429	4.7619
Con	1	L-R_forelimbs	0.4375	157.5	3.125
Con	1	L-R_forelimbs	0.527778	190	2.77778
Con	1	L-R_forelimbs	0.481481	173.333	3.7037
Con	1	L-R_forelimbs	0.466667	168	3.33333
Con	1	L-R_forelimbs	0.457143	164.571	2.85714
Con	1	L-R_forelimbs	0.641026	230.769	2.5641
Con	1	L-R_forelimbs	0.53125	191.25	3.125
Con	1	L-R_forelimbs	0.470588	169.412	2.94118
Con	1	L-R_forelimbs	0.521739	187.826	2.17391
Con	1	L-R_forelimbs	0.525	189	2.5
Con	1	L-R_forelimbs	0.5	180	3.125
Con	1	L-R_forelimbs	0.466667	168	3.33333
Con	2	L-R_forelimbs	0.5	180	3.84615
Con	2	L-R_forelimbs	0.407407	146.667	3.7037
Con	2	L-R_forelimbs	0.5	180	4.54545
Con	2	L-R_forelimbs	0.433333	156	3.33333
Con	2	L-R_forelimbs	0.342105	123.158	2.63158
Con	2	L-R_forelimbs	0.481481	173.333	3.7037
Con	2	L-R_forelimbs	0.428571	154.286	3.57143
Con	2	L-R_forelimbs	0.347826	125.217	2.17391
Con	2	L-R_forelimbs	0.517241	186.207	3.44828
Con	2	L-R_forelimbs	0.482759	173.793	3.44828
Con	2	L-R_forelimbs	0.458333	165	4.16667
Con	7	L-R_forelimbs	0.514286	185.143	2.85714
Con	7	L-R_forelimbs	0.522727	188.182	2.27273
Con	7	L-R_forelimbs	0.520833	187.5	2.08333
Con	7	L-R_forelimbs	0.431034	155.172	1.72414
Con	7	L-R_forelimbs	0.568627	204.706	1.96078
Con	7	L-R_forelimbs	0.59375	213.75	3.125
Con	7	L-R_forelimbs	0.535714	192.857	3.57143
Con	7	L-R_forelimbs	0.52381	188.571	2.38095
Con	7	L-R_forelimbs	0.487805	175.61	2.43902
Con	7	L-R_forelimbs	0.592593	213.333	3.7037
Con	8	L-R_forelimbs	0.466667	168	3.33333
Con	8	L-R_forelimbs	0.548387	197.419	3.22581
Con	8	L-R_forelimbs	0.516129	185.806	3.22581
Con	8	L-R_forelimbs	0.5	180	3.57143
Con	8	L-R_forelimbs	0.5	180	3.57143
Con	8	L-R_forelimbs	0.657895	236.842	2.63158
Con	8	L-R_forelimbs	0.407407	146.667	3.7037
Con	8	L-R_forelimbs	0.545455	196.364	2.27273
Con	8	L-R_forelimbs	0.478261	172.174	4.34783
Con	9	L-R_forelimbs	0.5	180	4.16667
Con	9	L-R_forelimbs	0.40625	146.25	3.125
Con	9	L-R_forelimbs	0.516129	185.806	3.22581
Con	9	L-R_forelimbs	0.45	162	5
Con	9	L-R_forelimbs	0.44	158.4	4
Con	9	L-R_forelimbs	0.5	180	3.33333
Con	9	L-R_forelimbs	0.483871	174.194	3.22581
Con	9	L-R_forelimbs	0.482759	173.793	3.44828
Con	9	L-R_forelimbs	0.516129	185.806	3.22581
Con	10	L-R_forelimbs	0.533333	192	3.33333
Con	10	L-R_forelimbs	0.5	180	3.84615
Con	10	L-R_forelimbs	0.515152	185.455	3.0303
Con	10	L-R_forelimbs	0.451613	162.581	3.22581
Con	10	L-R_forelimbs	0.4375	157.5	3.125
Con	10	L-R_forelimbs	0.52381	188.571	2.38095
Con	10	L-R_forelimbs	0.515152	185.455	3.0303
Con	10	L-R_forelimbs	0.488372	175.814	2.32558
Con	10	L-R_forelimbs	0.391304	140.87	4.34783
Con	10	L-R_forelimbs	0.48	172.8	4
Con	12	L-R_forelimbs	0.5	180	4.16667
Con	12	L-R_forelimbs	0.36	129.6	4
Con	12	L-R_forelimbs	0.5	180	3.84615
Con	12	L-R_forelimbs	0.535714	192.857	3.57143
Con	12	L-R_forelimbs	0.511628	184.186	2.32558
Con	12	L-R_forelimbs	0.444444	160	3.7037
Con	12	L-R_forelimbs	0.5	180	3.125
Con	12	L-R_forelimbs	0.444444	160	3.7037
Con	13	L-R_forelimbs	0.516129	185.806	3.22581
Con	13	L-R_forelimbs	0.586207	211.034	3.44828
Con	13	L-R_forelimbs	0.5	180	3.57143
Con	13	L-R_forelimbs	0.580645	209.032	3.22581
Con	13	L-R_forelimbs	0.5	180	4.16667
Con	13	L-R_forelimbs	0.464286	167.143	3.57143
Con	14	L-R_forelimbs	0.448276	161.379	3.44828
Con	14	L-R_forelimbs	0.434783	156.522	4.34783
Con	14	L-R_forelimbs	0.488372	175.814	2.32558
Con	14	L-R_forelimbs	0.541667	195	4.16667
Con	14	L-R_forelimbs	0.5	180	3.84615
Con	14	L-R_forelimbs	0.433333	156	3.33333
Con	15	L-R_forelimbs	0.5	180	3.84615
Con	15	L-R_forelimbs	0.518519	186.667	3.7037
Con	15	L-R_forelimbs	0.538462	193.846	3.84615
Con	15	L-R_forelimbs	0.56	201.6	4
Con	15	L-R_forelimbs	0.5	180	2.38095
Con	15	L-R_forelimbs	0.486486	175.135	2.7027
Con	15	L-R_forelimbs	0.466667	168	3.33333
Con	15	L-R_forelimbs	0.535714	192.857	3.57143
Con	15	L-R_forelimbs	0.423077	152.308	3.84615
Con	15	L-R_forelimbs	0.434783	156.522	4.34783
Con	16	L-R_forelimbs	0.56	201.6	4
Con	16	L-R_forelimbs	0.470588	169.412	2.94118
Con	16	L-R_forelimbs	0.565217	203.478	4.34783
Con	16	L-R_forelimbs	0.52	187.2	4
Con	16	L-R_forelimbs	0.619048	222.857	2.38095
Con	16	L-R_forelimbs	0.473684	170.526	2.63158
Con	16	L-R_forelimbs	0.607143	218.571	3.57143
Con	16	L-R_forelimbs	0.517241	186.207	3.44828
Con	16	L-R_forelimbs	0.470588	169.412	2.94118
Con	16	L-R_forelimbs	0.5	180	3.57143
Con	17	L-R_forelimbs	0.518519	186.667	3.7037
Con	17	L-R_forelimbs	0.464286	167.143	3.57143
Con	17	L-R_forelimbs	0.515152	185.455	3.0303
Con	17	L-R_forelimbs	0.555556	200	2.22222
Con	17	L-R_forelimbs	0.447368	161.053	2.63158
Con	17	L-R_forelimbs	0.5	180	3.84615
Con	17	L-R_forelimbs	0.461538	166.154	3.84615
Con	17	L-R_forelimbs	0.40625	146.25	3.125
Con	17	L-R_forelimbs	0.444444	160	2.77778
Con	18	L-R_forelimbs	0.484848	174.545	3.0303
Con	18	L-R_forelimbs	0.44	158.4	4
Con	18	L-R_forelimbs	0.5625	202.5	3.125
Con	18	L-R_forelimbs	0.461538	166.154	3.84615
Con	18	L-R_forelimbs	0.517241	186.207	3.44828
Con	18	L-R_forelimbs	0.444444	160	3.7037
Con	18	L-R_forelimbs	0.387097	139.355	3.22581
Con	18	L-R_forelimbs	0.545455	196.364	3.0303
Con	18	L-R_forelimbs	0.458333	165	4.16667
Con	18	L-R_forelimbs	0.545455	196.364	4.54545
Con	1	L-R_forelimbs	0.484848	174.545	3.0303
Con	1	L-R_forelimbs	0.533333	192	3.33333
Con	1	L-R_forelimbs	0.515152	185.455	3.0303
Con	1	L-R_forelimbs	0.5	180	2.63158
Con	1	L-R_forelimbs	0.441176	158.824	2.94118
Con	1	L-R_forelimbs	0.533333	192	3.33333
Con	1	L-R_forelimbs	0.475	171	2.5
Con	2	L-R_forelimbs	0.444444	160	3.7037
Con	2	L-R_forelimbs	0.518519	186.667	3.7037
Con	2	L-R_forelimbs	0.52	187.2	4
Con	2	L-R_forelimbs	0.470588	169.412	1.96078
Con	2	L-R_forelimbs	0.547619	197.143	2.38095
Con	2	L-R_forelimbs	0.527778	190	2.77778
Con	2	L-R_forelimbs	0.5	180	3.33333
Con	2	L-R_forelimbs	0.482759	173.793	3.44828
Con	2	L-R_forelimbs	0.485714	174.857	2.85714
Con	2	L-R_forelimbs	0.5	180	2.77778
Con	7	L-R_forelimbs	0.527778	190	2.77778
Con	7	L-R_forelimbs	0.481481	173.333	3.7037
Con	7	L-R_forelimbs	0.566667	204	3.33333
Con	7	L-R_forelimbs	0.542857	195.429	2.85714
Con	7	L-R_forelimbs	0.487179	175.385	2.5641
Con	7	L-R_forelimbs	0.638298	229.787	2.12766
Con	7	L-R_forelimbs	0.518519	186.667	3.7037
Con	7	L-R_forelimbs	0.612903	220.645	3.22581
Con	7	L-R_forelimbs	0.518519	186.667	3.7037
Con	8	L-R_forelimbs	0.393939	141.818	3.0303
Con	8	L-R_forelimbs	0.555556	200	3.7037
Con	8	L-R_forelimbs	0.521739	187.826	4.34783
Con	8	L-R_forelimbs	0.555556	200	3.7037
Con	8	L-R_forelimbs	0.571429	205.714	3.57143
Con	8	L-R_forelimbs	0.4	144	4
Con	8	L-R_forelimbs	0.545455	196.364	4.54545
Con	8	L-R_forelimbs	0.516129	185.806	3.22581
Con	9	L-R_forelimbs	0.52	187.2	4
Con	9	L-R_forelimbs	0.5	180	4.54545
Con	9	L-R_forelimbs	0.55	198	5
Con	9	L-R_forelimbs	0.608696	219.13	4.34783
Con	9	L-R_forelimbs	0.647059	232.941	5.88235
Con	9	L-R_forelimbs	0.585366	210.732	2.43902
Con	9	L-R_forelimbs	0.416667	150	4.16667
Con	9	L-R_forelimbs	0.621622	223.784	2.7027
Con	10	L-R_forelimbs	0.434783	156.522	4.34783
Con	10	L-R_forelimbs	0.5	180	4.54545
Con	10	L-R_forelimbs	0.5	180	4.54545
Con	10	L-R_forelimbs	0.457143	164.571	2.85714
Con	10	L-R_forelimbs	0.470588	169.412	2.94118
Con	12	L-R_forelimbs	0.481481	173.333	3.7037
Con	12	L-R_forelimbs	0.518519	186.667	3.7037
Con	12	L-R_forelimbs	0.419355	150.968	3.22581
Con	12	L-R_forelimbs	0.451613	162.581	3.22581
Con	12	L-R_forelimbs	0.4	144	4
Con	12	L-R_forelimbs	0.5	180	4.54545
Con	12	L-R_forelimbs	0.48	172.8	4
Con	12	L-R_forelimbs	0.516129	185.806	3.22581
Con	13	L-R_forelimbs	0.55	198	2.5
Con	13	L-R_forelimbs	0.515152	185.455	3.0303
Con	13	L-R_forelimbs	0.47619	171.429	2.38095
Con	13	L-R_forelimbs	0.571429	205.714	3.57143
Con	13	L-R_forelimbs	0.625	225	3.125
Con	13	L-R_forelimbs	0.484848	174.545	3.0303
Con	13	L-R_forelimbs	0.566667	204	3.33333
Con	13	L-R_forelimbs	0.56	201.6	4
Con	13	L-R_forelimbs	0.488372	175.814	2.32558
Con	13	L-R_forelimbs	0.514286	185.143	2.85714
Con	14	L-R_forelimbs	0.451613	162.581	3.22581
Con	14	L-R_forelimbs	0.5	180	3.33333
Con	14	L-R_forelimbs	0.484848	174.545	3.0303
Con	14	L-R_forelimbs	0.391304	140.87	4.34783
Con	14	L-R_forelimbs	0.451613	162.581	3.22581
Con	14	L-R_forelimbs	0.5	180	2.77778
Con	14	L-R_forelimbs	0.482759	173.793	3.44828
Con	14	L-R_forelimbs	0.481481	173.333	3.7037
Con	15	L-R_forelimbs	0.487805	175.61	2.43902
Con	15	L-R_forelimbs	0.533333	192	2.22222
Con	15	L-R_forelimbs	0.55	198	2.5
Con	15	L-R_forelimbs	0.529412	190.588	2.94118
Con	15	L-R_forelimbs	0.55	198	2.5
Con	15	L-R_forelimbs	0.448276	161.379	3.44828
Con	15	L-R_forelimbs	0.514286	185.143	2.85714
Con	15	L-R_forelimbs	0.487179	175.385	2.5641
Con	15	L-R_forelimbs	0.5	180	3.33333
Con	15	L-R_forelimbs	0.518519	186.667	3.7037
Con	15	L-R_forelimbs	0.518519	186.667	3.7037
Con	16	L-R_forelimbs	0.5	180	3.33333
Con	16	L-R_forelimbs	0.56	201.6	4
Con	16	L-R_forelimbs	0.59375	213.75	3.125
Con	16	L-R_forelimbs	0.533333	192	3.33333
Con	16	L-R_forelimbs	0.555556	200	3.7037
Con	16	L-R_forelimbs	0.5	180	3.84615
Con	16	L-R_forelimbs	0.575758	207.273	3.0303
Con	16	L-R_forelimbs	0.423077	152.308	3.84615
Con	16	L-R_forelimbs	0.447368	161.053	2.63158
Con	16	L-R_forelimbs	0.555556	200	3.7037
Con	16	L-R_forelimbs	0.526316	189.474	2.63158
Con	16	L-R_forelimbs	0.548387	197.419	3.22581
Con	17	L-R_forelimbs	0.46875	168.75	3.125
Con	17	L-R_forelimbs	0.538462	193.846	3.84615
Con	17	L-R_forelimbs	0.529412	190.588	2.94118
Con	17	L-R_forelimbs	0.470588	169.412	2.94118
Con	17	L-R_forelimbs	0.485714	174.857	2.85714
Con	17	L-R_forelimbs	0.535714	192.857	3.57143
Con	17	L-R_forelimbs	0.533333	192	3.33333
Con	17	L-R_forelimbs	0.425	153	2.5
Con	17	L-R_forelimbs	0.5	180	3.57143
Con	17	L-R_forelimbs	0.481481	173.333	3.7037
Con	18	L-R_forelimbs	0.5	180	2.94118
Con	18	L-R_forelimbs	0.5	180	3.125
Con	18	L-R_forelimbs	0.485714	174.857	2.85714
Con	18	L-R_forelimbs	0.5	180	2.27273
Con	18	L-R_forelimbs	0.574468	206.809	2.12766
Con	18	L-R_forelimbs	0.535714	192.857	3.57143
Con	18	L-R_forelimbs	0.516129	185.806	3.22581
Con	18	L-R_forelimbs	0.5	180	3.33333
Con	18	L-R_forelimbs	0.464286	167.143	3.57143
Con	18	L-R_forelimbs	0.458333	165	4.16667
Con	18	L-R_forelimbs	0.5	180	4.16667
Con	18	L-R_forelimbs	0.5	180	4.54545
Con	18	L-R_forelimbs	0.444444	160	3.7037
Con	18	L-R_forelimbs	0.483871	174.194	3.22581
Dox	1	L-R_forelimbs	0.5	180	3.125
Dox	1	L-R_forelimbs	0.5	180	3.33333
Dox	1	L-R_forelimbs	0.448276	161.379	3.44828
Dox	1	L-R_forelimbs	0.516129	185.806	3.22581
Dox	1	L-R_forelimbs	0.482759	173.793	3.44828
Dox	1	L-R_forelimbs	0.5	180	3.33333
Dox	1	L-R_forelimbs	0.533333	192	3.33333
Dox	2	L-R_forelimbs	0.483871	174.194	3.22581
Dox	2	L-R_forelimbs	0.5	180	3.33333
Dox	2	L-R_forelimbs	0.580645	209.032	3.22581
Dox	2	L-R_forelimbs	0.571429	205.714	3.57143
Dox	2	L-R_forelimbs	0.481481	173.333	3.7037
Dox	2	L-R_forelimbs	0.5	180	3.84615
Dox	2	L-R_forelimbs	0.5	180	4.16667
Dox	2	L-R_forelimbs	0.541667	195	4.16667
Dox	2	L-R_forelimbs	0.464286	167.143	3.57143
Dox	2	L-R_forelimbs	0.52	187.2	4
Dox	7	L-R_forelimbs	0.451613	162.581	3.22581
Dox	7	L-R_forelimbs	0.5	180	3.33333
Dox	7	L-R_forelimbs	0.4	144	5
Dox	7	L-R_forelimbs	0.483871	174.194	3.22581
Dox	7	L-R_forelimbs	0.592593	213.333	3.7037
Dox	7	L-R_forelimbs	0.56	201.6	4
Dox	7	L-R_forelimbs	0.515152	185.455	3.0303
Dox	7	L-R_forelimbs	0.583333	210	2.77778
Dox	7	L-R_forelimbs	0.741935	267.097	3.22581
Dox	7	L-R_forelimbs	0.513514	184.865	2.7027
Dox	8	L-R_forelimbs	0.515152	185.455	3.0303
Dox	8	L-R_forelimbs	0.428571	154.286	2.85714
Dox	8	L-R_forelimbs	0.535714	192.857	3.57143
Dox	8	L-R_forelimbs	0.518519	186.667	3.7037
Dox	8	L-R_forelimbs	0.46875	168.75	3.125
Dox	8	L-R_forelimbs	0.5	180	3.57143
Dox	8	L-R_forelimbs	0.388889	140	2.77778
Dox	8	L-R_forelimbs	0.540541	194.595	2.7027
Dox	8	L-R_forelimbs	0.560976	201.951	2.43902
Dox	8	L-R_forelimbs	0.6	216	2.5
Dox	8	L-R_forelimbs	0.46875	168.75	3.125
Dox	9	L-R_forelimbs	0.5	180	2.94118
Dox	9	L-R_forelimbs	0.483871	174.194	3.22581
Dox	9	L-R_forelimbs	0.425	153	2.5
Dox	9	L-R_forelimbs	0.5	180	3.84615
Dox	9	L-R_forelimbs	0.48	172.8	4
Dox	9	L-R_forelimbs	0.454545	163.636	3.0303
Dox	9	L-R_forelimbs	0.423077	152.308	3.84615
Dox	9	L-R_forelimbs	0.433333	156	3.33333
Dox	9	L-R_forelimbs	0.466667	168	3.33333
Dox	9	L-R_forelimbs	0.5	180	3.84615
Dox	10	L-R_forelimbs	0.46875	168.75	3.125
Dox	10	L-R_forelimbs	0.5	180	3.57143
Dox	10	L-R_forelimbs	0.482759	173.793	3.44828
Dox	10	L-R_forelimbs	0.464286	167.143	3.57143
Dox	10	L-R_forelimbs	0.535714	192.857	3.57143
Dox	10	L-R_forelimbs	0.521739	187.826	4.34783
Dox	10	L-R_forelimbs	0.590909	212.727	4.54545
Dox	10	L-R_forelimbs	0.428571	154.286	4.7619
Dox	10	L-R_forelimbs	0.48	172.8	4
Dox	10	L-R_forelimbs	0.571429	205.714	4.7619
Dox	10	L-R_forelimbs	0.347826	125.217	4.34783
Dox	10	L-R_forelimbs	0.375	135	4.16667
Dox	12	L-R_forelimbs	0.56	201.6	4
Dox	12	L-R_forelimbs	0.48	172.8	4
Dox	12	L-R_forelimbs	0.545455	196.364	4.54545
Dox	12	L-R_forelimbs	0.323529	116.471	2.94118
Dox	12	L-R_forelimbs	0.533333	192	3.33333
Dox	12	L-R_forelimbs	0.555556	200	3.7037
Dox	13	L-R_forelimbs	0.516129	185.806	3.22581
Dox	13	L-R_forelimbs	0.56	201.6	4
Dox	13	L-R_forelimbs	0.517241	186.207	3.44828
Dox	13	L-R_forelimbs	0.34375	123.75	3.125
Dox	13	L-R_forelimbs	0.5	180	3.84615
Dox	13	L-R_forelimbs	0.527778	190	2.77778
Dox	13	L-R_forelimbs	0.348837	125.581	2.32558
Dox	13	L-R_forelimbs	0.6875	247.5	3.125
Dox	13	L-R_forelimbs	0.53125	191.25	3.125
Dox	14	L-R_forelimbs	0.407407	146.667	3.7037
Dox	14	L-R_forelimbs	0.444444	160	3.7037
Dox	14	L-R_forelimbs	0.464286	167.143	3.57143
Dox	14	L-R_forelimbs	0.5	180	4.54545
Dox	14	L-R_forelimbs	0.47619	171.429	4.7619
Dox	14	L-R_forelimbs	0.478261	172.174	4.34783
Dox	14	L-R_forelimbs	0.521739	187.826	4.34783
Dox	14	L-R_forelimbs	0.466667	168	3.33333
Dox	14	L-R_forelimbs	0.428571	154.286	3.57143
Dox	15	L-R_forelimbs	0.444444	160	3.7037
Dox	15	L-R_forelimbs	0.478261	172.174	4.34783
Dox	15	L-R_forelimbs	0.647059	232.941	5.88235
Dox	15	L-R_forelimbs	0.434783	156.522	4.34783
Dox	15	L-R_forelimbs	0.428571	154.286	4.7619
Dox	15	L-R_forelimbs	0.71875	258.75	3.125
Dox	15	L-R_forelimbs	0.514286	185.143	2.85714
Dox	15	L-R_forelimbs	0.3	108	5
Dox	15	L-R_forelimbs	0.272727	98.1818	4.54545
Dox	16	L-R_forelimbs	0.56	201.6	4
Dox	16	L-R_forelimbs	0.64	230.4	4
Dox	16	L-R_forelimbs	0.428571	154.286	3.57143
Dox	16	L-R_forelimbs	0.346154	124.615	3.84615
Dox	16	L-R_forelimbs	0.363636	130.909	4.54545
Dox	16	L-R_forelimbs	0.586207	211.034	3.44828
Dox	16	L-R_forelimbs	0.555556	200	3.7037
Dox	16	L-R_forelimbs	0.541667	195	4.16667
Dox	16	L-R_forelimbs	0.590909	212.727	4.54545
Dox	17	L-R_forelimbs	0.464286	167.143	3.57143
Dox	17	L-R_forelimbs	0.461538	166.154	3.84615
Dox	17	L-R_forelimbs	0.0571429	20.5714	2.85714
Dox	17	L-R_forelimbs	0.230769	83.0769	2.5641
Dox	17	L-R_forelimbs	0.545455	196.364	4.54545
Dox	17	L-R_forelimbs	0.48	172.8	4
Dox	18	L-R_forelimbs	0.434783	156.522	4.34783
Dox	18	L-R_forelimbs	0.521739	187.826	4.34783
Dox	18	L-R_forelimbs	0.4	144	5
Dox	18	L-R_forelimbs	0.484848	174.545	3.0303
Dox	18	L-R_forelimbs	0.473684	170.526	2.63158
Dox	18	L-R_forelimbs	0.425	153	2.5
Dox	18	L-R_forelimbs	0.571429	205.714	2.85714
Dox	18	L-R_forelimbs	0.578947	208.421	2.63158
Dox	18	L-R_forelimbs	0.566667	204	3.33333
Dox	18	L-R_forelimbs	0.482759	173.793	3.44828
Dox	18	L-R_forelimbs	0.454545	163.636	4.54545
Dox	18	L-R_forelimbs	0.333333	120	5.55556
Dox	1	L-R_forelimbs	0.515152	185.455	3.0303
Dox	1	L-R_forelimbs	0.551724	198.621	3.44828
Dox	1	L-R_forelimbs	0.483871	174.194	3.22581
Dox	1	L-R_forelimbs	0.551724	198.621	3.44828
Dox	1	L-R_forelimbs	0.53125	191.25	3.125
Dox	1	L-R_forelimbs	0.606061	218.182	3.0303
Dox	1	L-R_forelimbs	0.529412	190.588	2.94118
Dox	1	L-R_forelimbs	0.548387	197.419	3.22581
Dox	1	L-R_forelimbs	0.586207	211.034	3.44828
Dox	1	L-R_forelimbs	0.62963	226.667	3.7037
Dox	2	L-R_forelimbs	0.516129	185.806	3.22581
Dox	2	L-R_forelimbs	0.595238	214.286	2.38095
Dox	2	L-R_forelimbs	0.5	180	2.94118
Dox	2	L-R_forelimbs	0.578947	208.421	2.63158
Dox	2	L-R_forelimbs	0.525	189	2.5
Dox	2	L-R_forelimbs	0.633333	228	3.33333
Dox	2	L-R_forelimbs	0.5	180	3.33333
Dox	2	L-R_forelimbs	0.380952	137.143	2.38095
Dox	2	L-R_forelimbs	0.560976	201.951	2.43902
Dox	7	L-R_forelimbs	0.548387	197.419	3.22581
Dox	7	L-R_forelimbs	0.517241	186.207	3.44828
Dox	7	L-R_forelimbs	0.628571	226.286	2.85714
Dox	7	L-R_forelimbs	0.355556	128	2.22222
Dox	7	L-R_forelimbs	0.457143	164.571	2.85714
Dox	7	L-R_forelimbs	0.465116	167.442	2.32558
Dox	7	L-R_forelimbs	0.487179	175.385	2.5641
Dox	7	L-R_forelimbs	0.424242	152.727	3.0303
Dox	7	L-R_forelimbs	0.515152	185.455	3.0303
Dox	7	L-R_forelimbs	0.62963	226.667	3.7037
Dox	7	L-R_forelimbs	0.615385	221.538	3.84615
Dox	8	L-R_forelimbs	0.517241	186.207	3.44828
Dox	8	L-R_forelimbs	0.461538	166.154	2.5641
Dox	8	L-R_forelimbs	0.5	180	4.16667
Dox	8	L-R_forelimbs	0.551724	198.621	3.44828
Dox	8	L-R_forelimbs	0.538462	193.846	3.84615
Dox	8	L-R_forelimbs	0.548387	197.419	3.22581
Dox	8	L-R_forelimbs	0.631579	227.368	2.63158
Dox	8	L-R_forelimbs	0.5	180	3.84615
Dox	8	L-R_forelimbs	0.6	216	3.33333
Dox	8	L-R_forelimbs	0.441176	158.824	2.94118
Dox	9	L-R_forelimbs	0.481481	173.333	3.7037
Dox	9	L-R_forelimbs	0.48	172.8	4
Dox	9	L-R_forelimbs	0.45	162	5
Dox	9	L-R_forelimbs	0.47619	171.429	4.7619
Dox	9	L-R_forelimbs	0.263158	94.7368	5.26316
Dox	9	L-R_forelimbs	0.761905	274.286	4.7619
Dox	9	L-R_forelimbs	0.65	234	5
Dox	9	L-R_forelimbs	0.346154	124.615	3.84615
Dox	9	L-R_forelimbs	0.428571	154.286	3.57143
Dox	9	L-R_forelimbs	0.222222	80	3.7037
Dox	10	L-R_forelimbs	0.5	180	4.16667
Dox	10	L-R_forelimbs	0.44	158.4	4
Dox	10	L-R_forelimbs	0.566667	204	3.33333
Dox	10	L-R_forelimbs	0.551724	198.621	3.44828
Dox	10	L-R_forelimbs	0.608696	219.13	4.34783
Dox	10	L-R_forelimbs	0.681818	245.455	4.54545
Dox	10	L-R_forelimbs	0.684211	246.316	5.26316
Dox	10	L-R_forelimbs	0.761905	274.286	4.7619
Dox	10	L-R_forelimbs	0.517241	186.207	3.44828
Dox	10	L-R_forelimbs	0.571429	205.714	3.57143
Dox	12	L-R_forelimbs	0.458333	165	4.16667
Dox	12	L-R_forelimbs	0.454545	163.636	4.54545
Dox	12	L-R_forelimbs	0.46875	168.75	3.125
Dox	12	L-R_forelimbs	0.589744	212.308	2.5641
Dox	12	L-R_forelimbs	0.473684	170.526	2.63158
Dox	12	L-R_forelimbs	0.421053	151.579	2.63158
Dox	12	L-R_forelimbs	0.522727	188.182	2.27273
Dox	12	L-R_forelimbs	0.571429	205.714	4.7619
Dox	12	L-R_forelimbs	0.478261	172.174	4.34783
Dox	13	L-R_forelimbs	0.576923	207.692	3.84615
Dox	13	L-R_forelimbs	0.518519	186.667	3.7037
Dox	13	L-R_forelimbs	0.541667	195	4.16667
Dox	13	L-R_forelimbs	0.565217	203.478	4.34783
Dox	13	L-R_forelimbs	0.466667	168	3.33333
Dox	13	L-R_forelimbs	0.428571	154.286	4.7619
Dox	14	L-R_forelimbs	0.357143	128.571	3.57143
Dox	14	L-R_forelimbs	0.46875	168.75	3.125
Dox	14	L-R_forelimbs	0.458333	165	4.16667
Dox	14	L-R_forelimbs	0.48	172.8	4
Dox	14	L-R_forelimbs	0.428571	154.286	3.57143
Dox	14	L-R_forelimbs	0.384615	138.462	3.84615
Dox	14	L-R_forelimbs	0.478261	172.174	2.17391
Dox	14	L-R_forelimbs	0.4375	157.5	3.125
Dox	14	L-R_forelimbs	0.521739	187.826	4.34783
Dox	14	L-R_forelimbs	0.5	180	4.54545
Dox	14	L-R_forelimbs	0.478261	172.174	4.34783
Dox	15	L-R_forelimbs	0.478261	172.174	4.34783
Dox	15	L-R_forelimbs	0.5	180	4.16667
Dox	15	L-R_forelimbs	0.333333	120	4.7619
Dox	15	L-R_forelimbs	0.380952	137.143	4.7619
Dox	15	L-R_forelimbs	0.586207	211.034	3.44828
Dox	15	L-R_forelimbs	0.384615	138.462	3.84615
Dox	15	L-R_forelimbs	0.551724	198.621	3.44828
Dox	15	L-R_forelimbs	0.695652	250.435	4.34783
Dox	15	L-R_forelimbs	0.789474	284.211	5.26316
Dox	16	L-R_forelimbs	0.56	201.6	4
Dox	16	L-R_forelimbs	0.481481	173.333	3.7037
Dox	16	L-R_forelimbs	0.521739	187.826	4.34783
Dox	16	L-R_forelimbs	0.714286	257.143	3.57143
Dox	16	L-R_forelimbs	0.833333	300	5.55556
Dox	17	L-R_forelimbs	0.484848	174.545	3.0303
Dox	17	L-R_forelimbs	0.5	180	3.125
Dox	17	L-R_forelimbs	0.48	172.8	4
Dox	17	L-R_forelimbs	0.565217	203.478	4.34783
Dox	17	L-R_forelimbs	0.48	172.8	4
Dox	17	L-R_forelimbs	0.458333	165	4.16667
Dox	17	L-R_forelimbs	0.461538	166.154	3.84615
Dox	17	L-R_forelimbs	0.52	187.2	4
Dox	17	L-R_forelimbs	0.65	234	5
Dox	18	L-R_forelimbs	0.478261	172.174	4.34783
Dox	18	L-R_forelimbs	0.5	180	4.16667
Dox	18	L-R_forelimbs	0.545455	196.364	4.54545
Dox	18	L-R_forelimbs	0.5	180	3.33333
Dox	18	L-R_forelimbs	0.56	201.6	4
Dox	18	L-R_forelimbs	0.478261	172.174	4.34783
Dox	18	L-R_forelimbs	0.52	187.2	4
Dox	18	L-R_forelimbs	0.583333	210	4.16667
Dox	18	L-R_forelimbs	0.52381	188.571	4.7619
Dox	18	L-R_forelimbs	0.75	270	5
Dox	18	L-R_forelimbs	0.75	270	6.25
Dox	1	L-R_forelimbs	0.941176	338.824	2.94118
Dox	1	L-R_forelimbs	0.9375	337.5	3.125
Dox	1	L-R_forelimbs	0	0	3.125
Dox	1	L-R_forelimbs	0.441176	158.824	2.94118
Dox	1	L-R_forelimbs	0.424242	152.727	3.0303
Dox	1	L-R_forelimbs	0.567568	204.324	2.7027
Dox	1	L-R_forelimbs	0.512821	184.615	2.5641
Dox	1	L-R_forelimbs	0.595238	214.286	2.38095
Dox	1	L-R_forelimbs	0.581395	209.302	2.32558
Dox	1	L-R_forelimbs	0.44186	159.07	2.32558
Dox	1	L-R_forelimbs	0.568182	204.545	2.27273
Dox	2	L-R_forelimbs	0.461538	166.154	3.84615
Dox	2	L-R_forelimbs	0.388889	140	2.77778
Dox	2	L-R_forelimbs	0.52	187.2	4
Dox	2	L-R_forelimbs	0.461538	166.154	3.84615
Dox	2	L-R_forelimbs	0.517241	186.207	3.44828
Dox	2	L-R_forelimbs	0.590909	212.727	4.54545
Dox	2	L-R_forelimbs	0.5	180	4.54545
Dox	2	L-R_forelimbs	0.6	216	3.33333
Dox	2	L-R_forelimbs	0.5	180	3.84615
Dox	7	L-R_forelimbs	0.466667	168	3.33333
Dox	7	L-R_forelimbs	0.516129	185.806	3.22581
Dox	7	L-R_forelimbs	0.422222	152	2.22222
Dox	7	L-R_forelimbs	0.536585	193.171	2.43902
Dox	7	L-R_forelimbs	0.571429	205.714	2.85714
Dox	7	L-R_forelimbs	0.578947	208.421	2.63158
Dox	7	L-R_forelimbs	0.607143	218.571	3.57143
Dox	7	L-R_forelimbs	0.564103	203.077	2.5641
Dox	7	L-R_forelimbs	0.594595	214.054	2.7027
Dox	7	L-R_forelimbs	0.551724	198.621	3.44828
Dox	8	L-R_forelimbs	0.457143	164.571	2.85714
Dox	8	L-R_forelimbs	0.541667	195	4.16667
Dox	8	L-R_forelimbs	0.6	216	2.5
Dox	8	L-R_forelimbs	0.575758	207.273	3.0303
Dox	8	L-R_forelimbs	0.513514	184.865	2.7027
Dox	8	L-R_forelimbs	0.536585	193.171	2.43902
Dox	8	L-R_forelimbs	0.538462	193.846	2.5641
Dox	8	L-R_forelimbs	0.515152	185.455	3.0303
Dox	8	L-R_forelimbs	0.517241	186.207	3.44828
Dox	9	L-R_forelimbs	0.461538	166.154	3.84615
Dox	9	L-R_forelimbs	0.535714	192.857	3.57143
Dox	9	L-R_forelimbs	0.235294	84.7059	5.88235
Dox	9	L-R_forelimbs	0.333333	120	4.7619
Dox	9	L-R_forelimbs	0.315789	113.684	5.26316
Dox	9	L-R_forelimbs	0.538462	193.846	3.84615
Dox	9	L-R_forelimbs	0.483871	174.194	3.22581
Dox	9	L-R_forelimbs	0	0	6.66667
Dox	9	L-R_forelimbs	1	360	6.25
Dox	10	L-R_forelimbs	0.478261	172.174	4.34783
Dox	10	L-R_forelimbs	0.590909	212.727	4.54545
Dox	10	L-R_forelimbs	0.571429	205.714	4.7619
Dox	10	L-R_forelimbs	0.703704	253.333	3.7037
Dox	10	L-R_forelimbs	0.52	187.2	4
Dox	10	L-R_forelimbs	0.684211	246.316	5.26316
Dox	10	L-R_forelimbs	0.736842	265.263	5.26316
Dox	10	L-R_forelimbs	0.736842	265.263	5.26316
Dox	12	L-R_forelimbs	0.619048	222.857	4.7619
Dox	12	L-R_forelimbs	0.631579	227.368	5.26316
Dox	12	L-R_forelimbs	0.478261	172.174	4.34783
Dox	12	L-R_forelimbs	0.423077	152.308	3.84615
Dox	12	L-R_forelimbs	0.458333	165	4.16667
Dox	12	L-R_forelimbs	0.424242	152.727	3.0303
Dox	12	L-R_forelimbs	0.529412	190.588	2.94118
Dox	12	L-R_forelimbs	0.409091	147.273	2.27273
Dox	12	L-R_forelimbs	0.416667	150	2.08333
Dox	12	L-R_forelimbs	0.478261	172.174	2.17391
Dox	12	L-R_forelimbs	0.526316	189.474	2.63158
Dox	13	L-R_forelimbs	0.555556	200	3.7037
Dox	13	L-R_forelimbs	0.533333	192	2.22222
Dox	13	L-R_forelimbs	0.473684	170.526	1.75439
Dox	13	L-R_forelimbs	0.512195	184.39	2.43902
Dox	13	L-R_forelimbs	0.482759	173.793	3.44828
Dox	13	L-R_forelimbs	0.459459	165.405	2.7027
Dox	13	L-R_forelimbs	0.454545	163.636	3.0303
Dox	13	L-R_forelimbs	0.487179	175.385	2.5641
Dox	14	L-R_forelimbs	0.5	180	3.84615
Dox	14	L-R_forelimbs	0.5	180	3.84615
Dox	14	L-R_forelimbs	0.347826	125.217	4.34783
Dox	14	L-R_forelimbs	0.363636	130.909	4.54545
Dox	14	L-R_forelimbs	0.4	144	3.33333
Dox	14	L-R_forelimbs	0.444444	160	3.7037
Dox	14	L-R_forelimbs	0.478261	172.174	4.34783
Dox	14	L-R_forelimbs	0.458333	165	4.16667
Dox	14	L-R_forelimbs	0.461538	166.154	3.84615
Dox	14	L-R_forelimbs	0.481481	173.333	3.7037
Dox	15	L-R_forelimbs	0.44	158.4	4
Dox	15	L-R_forelimbs	0.869565	313.043	4.34783
Dox	15	L-R_forelimbs	0.8	288	6.66667
Dox	15	L-R_forelimbs	0.789474	284.211	5.26316
Dox	15	L-R_forelimbs	0.461538	166.154	3.84615
Dox	15	L-R_forelimbs	0.583333	210	4.16667
Dox	15	L-R_forelimbs	0.55	198	5
Dox	15	L-R_forelimbs	0.592593	213.333	3.7037
Dox	15	L-R_forelimbs	0.677419	243.871	3.22581
Dox	16	L-R_forelimbs	0.5	180	4.16667
Dox	16	L-R_forelimbs	0.481481	173.333	3.7037
Dox	16	L-R_forelimbs	0.545455	196.364	4.54545
Dox	16	L-R_forelimbs	0.5	180	2.77778
Dox	16	L-R_forelimbs	0.5	180	2.77778
Dox	16	L-R_forelimbs	0.552632	198.947	2.63158
Dox	16	L-R_forelimbs	0.26	93.6	2
Dox	16	L-R_forelimbs	0.466667	168	3.33333
Dox	17	L-R_forelimbs	0.44	158.4	4
Dox	17	L-R_forelimbs	0.478261	172.174	4.34783
Dox	17	L-R_forelimbs	0.461538	166.154	3.84615
Dox	17	L-R_forelimbs	0.521739	187.826	4.34783
Dox	17	L-R_forelimbs	0.428571	154.286	4.7619
Dox	17	L-R_forelimbs	0.394737	142.105	2.63158
Dox	17	L-R_forelimbs	0.40625	146.25	3.125
Dox	17	L-R_forelimbs	0.5	180	4.54545
Dox	17	L-R_forelimbs	0.52	187.2	4
Dox	17	L-R_forelimbs	0.5	180	3.84615
Dox	18	L-R_forelimbs	0.48	172.8	4
Dox	18	L-R_forelimbs	0.458333	165	4.16667
Dox	18	L-R_forelimbs	0.428571	154.286	4.7619
Dox	18	L-R_forelimbs	0.5	180	4.54545
Dox	18	L-R_forelimbs	0.478261	172.174	4.34783
Dox	18	L-R_forelimbs	0.526316	189.474	5.26316
Dox	18	L-R_forelimbs	0.684211	246.316	5.26316
Dox	18	L-R_forelimbs	0.7	252	5
Dox	1	L-R_forelimbs	0.5	180	2.94118
Dox	1	L-R_forelimbs	0.580645	209.032	3.22581
Dox	1	L-R_forelimbs	0.410256	147.692	2.5641
Dox	1	L-R_forelimbs	0.560976	201.951	2.43902
Dox	1	L-R_forelimbs	0.484848	174.545	3.0303
Dox	1	L-R_forelimbs	0.548387	197.419	3.22581
Dox	1	L-R_forelimbs	0.470588	169.412	2.94118
Dox	1	L-R_forelimbs	0.5	180	3.57143
Dox	2	L-R_forelimbs	0.5	180	3.33333
Dox	2	L-R_forelimbs	0.516129	185.806	3.22581
Dox	2	L-R_forelimbs	0.518519	186.667	3.7037
Dox	2	L-R_forelimbs	0.551724	198.621	3.44828
Dox	2	L-R_forelimbs	0.448276	161.379	3.44828
Dox	2	L-R_forelimbs	0.588235	211.765	2.94118
Dox	2	L-R_forelimbs	0.513514	184.865	2.7027
Dox	2	L-R_forelimbs	0.551724	198.621	3.44828
Dox	7	L-R_forelimbs	0.485714	174.857	2.85714
Dox	7	L-R_forelimbs	0.59375	213.75	3.125
Dox	7	L-R_forelimbs	0.586207	211.034	3.44828
Dox	7	L-R_forelimbs	0.636364	229.091	3.0303
Dox	7	L-R_forelimbs	0.459459	165.405	2.7027
Dox	7	L-R_forelimbs	0.483871	174.194	3.22581
Dox	7	L-R_forelimbs	0.555556	200	3.7037
Dox	7	L-R_forelimbs	0.565217	203.478	4.34783
Dox	7	L-R_forelimbs	0.6	216	4
Dox	7	L-R_forelimbs	0.619048	222.857	4.7619
Dox	8	L-R_forelimbs	0.448276	161.379	3.44828
Dox	8	L-R_forelimbs	0.518519	186.667	3.7037
Dox	8	L-R_forelimbs	0.541667	195	4.16667
Dox	8	L-R_forelimbs	0.481481	173.333	3.7037
Dox	8	L-R_forelimbs	0.529412	190.588	2.94118
Dox	8	L-R_forelimbs	0.571429	205.714	3.57143
Dox	8	L-R_forelimbs	0.576923	207.692	3.84615
Dox	8	L-R_forelimbs	0.608696	219.13	4.34783
Dox	8	L-R_forelimbs	0.583333	210	4.16667
Dox	9	L-R_forelimbs	0.608696	219.13	4.34783
Dox	9	L-R_forelimbs	0.521739	187.826	4.34783
Dox	9	L-R_forelimbs	0.65	234	5
Dox	9	L-R_forelimbs	0.517241	186.207	3.44828
Dox	9	L-R_forelimbs	0.583333	210	4.16667
Dox	9	L-R_forelimbs	0.382353	137.647	2.94118
Dox	9	L-R_forelimbs	0.521739	187.826	4.34783
Dox	9	L-R_forelimbs	0.541667	195	4.16667
Dox	9	L-R_forelimbs	0.65	234	5
Dox	9	L-R_forelimbs	0.53125	191.25	3.125
Dox	10	L-R_forelimbs	0.388889	140	5.55556
Dox	10	L-R_forelimbs	0.434783	156.522	4.34783
Dox	10	L-R_forelimbs	0.363636	130.909	4.54545
Dox	10	L-R_forelimbs	0.238095	85.7143	4.7619
Dox	10	L-R_forelimbs	0.526316	189.474	2.63158
Dox	10	L-R_forelimbs	0.736842	265.263	5.26316
Dox	10	L-R_forelimbs	0.75	270	6.25
Dox	10	L-R_forelimbs	0.708333	255	4.16667
Dox	10	L-R_forelimbs	0.866667	312	6.66667
Dox	10	L-R_forelimbs	0.652174	234.783	4.34783
Dox	10	L-R_forelimbs	0.655172	235.862	3.44828
Dox	12	L-R_forelimbs	0.375	135	3.125
Dox	12	L-R_forelimbs	0.444444	160	3.7037
Dox	12	L-R_forelimbs	0.434783	156.522	4.34783
Dox	12	L-R_forelimbs	0.454545	163.636	4.54545
Dox	12	L-R_forelimbs	0.409091	147.273	4.54545
Dox	12	L-R_forelimbs	0.56	201.6	4
Dox	12	L-R_forelimbs	0.380952	137.143	4.7619
Dox	12	L-R_forelimbs	0.5	180	4.54545
Dox	13	L-R_forelimbs	0.444444	160	3.7037
Dox	13	L-R_forelimbs	0.48	172.8	4
Dox	13	L-R_forelimbs	0.588235	211.765	2.94118
Dox	13	L-R_forelimbs	0.555556	200	3.7037
Dox	13	L-R_forelimbs	0.433333	156	3.33333
Dox	13	L-R_forelimbs	0.414634	149.268	2.43902
Dox	13	L-R_forelimbs	0.48	172.8	4
Dox	13	L-R_forelimbs	0.512821	184.615	2.5641
Dox	13	L-R_forelimbs	0.568182	204.545	2.27273
Dox	13	L-R_forelimbs	0.517241	186.207	3.44828
Dox	14	L-R_forelimbs	0.428571	154.286	3.57143
Dox	14	L-R_forelimbs	0.483871	174.194	3.22581
Dox	14	L-R_forelimbs	0.413793	148.966	3.44828
Dox	14	L-R_forelimbs	0.482759	173.793	3.44828
Dox	14	L-R_forelimbs	0.424242	152.727	3.0303
Dox	14	L-R_forelimbs	0.5	180	3.84615
Dox	14	L-R_forelimbs	0.481481	173.333	3.7037
Dox	14	L-R_forelimbs	0.464286	167.143	3.57143
Dox	14	L-R_forelimbs	0.490196	176.471	1.96078
Dox	14	L-R_forelimbs	0.435897	156.923	2.5641
Dox	15	L-R_forelimbs	0.448276	161.379	3.44828
Dox	15	L-R_forelimbs	0.5	180	3.33333
Dox	15	L-R_forelimbs	0.516129	185.806	3.22581
Dox	15	L-R_forelimbs	0.548387	197.419	3.22581
Dox	15	L-R_forelimbs	0.631579	227.368	5.26316
Dox	15	L-R_forelimbs	0.6	216	5
Dox	15	L-R_forelimbs	0.571429	205.714	3.57143
Dox	15	L-R_forelimbs	0.517241	186.207	3.44828
Dox	16	L-R_forelimbs	0.484848	174.545	3.0303
Dox	16	L-R_forelimbs	0.545455	196.364	3.0303
Dox	16	L-R_forelimbs	0.5	180	3.84615
Dox	16	L-R_forelimbs	0.5	180	3.33333
Dox	16	L-R_forelimbs	0.518519	186.667	3.7037
Dox	16	L-R_forelimbs	0.53125	191.25	3.125
Dox	16	L-R_forelimbs	0.5	180	4.16667
Dox	16	L-R_forelimbs	0.62069	223.448	3.44828
Dox	16	L-R_forelimbs	0.68	244.8	4
Dox	17	L-R_forelimbs	0.5	180	3.33333
Dox	17	L-R_forelimbs	0.558824	201.176	2.94118
Dox	17	L-R_forelimbs	0.53125	191.25	3.125
Dox	17	L-R_forelimbs	0.485714	174.857	2.85714
Dox	17	L-R_forelimbs	0.466667	168	3.33333
Dox	17	L-R_forelimbs	0.518519	186.667	3.7037
Dox	17	L-R_forelimbs	0.576923	207.692	3.84615
Dox	17	L-R_forelimbs	0.485714	174.857	2.85714
Dox	17	L-R_forelimbs	0.457143	164.571	2.85714
Dox	18	L-R_forelimbs	0.518519	186.667	3.7037
Dox	18	L-R_forelimbs	0.566667	204	3.33333
Dox	18	L-R_forelimbs	0.55	198	5
Dox	18	L-R_forelimbs	0.535714	192.857	3.57143
Dox	18	L-R_forelimbs	0.464286	167.143	3.57143
Dox	18	L-R_forelimbs	0.424242	152.727	3.0303
Dox	18	L-R_forelimbs	0.619048	222.857	4.7619
Dox	18	L-R_forelimbs	0.458333	165	4.16667
Dox	18	L-R_forelimbs	0.608696	219.13	4.34783
Dox	18	L-R_forelimbs	0.586207	211.034	3.44828
Dox	1	L-R_forelimbs	0.5	180	2.38095
Dox	1	L-R_forelimbs	0.487179	175.385	2.5641
Dox	1	L-R_forelimbs	0.517241	186.207	3.44828
Dox	1	L-R_forelimbs	0.461538	166.154	2.5641
Dox	1	L-R_forelimbs	0.5	180	3.125
Dox	1	L-R_forelimbs	0.645161	232.258	3.22581
Dox	1	L-R_forelimbs	0.48	172.8	2
Dox	1	L-R_forelimbs	0.517241	186.207	3.44828
Dox	2	L-R_forelimbs	0.466667	168	3.33333
Dox	2	L-R_forelimbs	0.535714	192.857	3.57143
Dox	2	L-R_forelimbs	0.409091	147.273	2.27273
Dox	2	L-R_forelimbs	0.5	180	3.33333
Dox	2	L-R_forelimbs	0.529412	190.588	2.94118
Dox	2	L-R_forelimbs	0.5	180	3.33333
Dox	2	L-R_forelimbs	0.538462	193.846	3.84615
Dox	2	L-R_forelimbs	0.48	172.8	4
Dox	2	L-R_forelimbs	0.538462	193.846	3.84615
Dox	7	L-R_forelimbs	0.555556	200	2.77778
Dox	7	L-R_forelimbs	0.555556	200	2.77778
Dox	7	L-R_forelimbs	0.555556	200	3.7037
Dox	7	L-R_forelimbs	0.53125	191.25	3.125
Dox	7	L-R_forelimbs	0.518519	186.667	3.7037
Dox	7	L-R_forelimbs	0.56	201.6	4
Dox	7	L-R_forelimbs	0.535714	192.857	3.57143
Dox	7	L-R_forelimbs	0.56	201.6	4
Dox	7	L-R_forelimbs	0.590909	212.727	4.54545
Dox	7	L-R_forelimbs	0.592593	213.333	3.7037
Dox	8	L-R_forelimbs	0.535714	192.857	3.57143
Dox	8	L-R_forelimbs	0.555556	200	3.7037
Dox	8	L-R_forelimbs	0.52	187.2	4
Dox	8	L-R_forelimbs	0.521739	187.826	4.34783
Dox	8	L-R_forelimbs	0.483871	174.194	3.22581
Dox	8	L-R_forelimbs	0.52	187.2	4
Dox	8	L-R_forelimbs	0.535714	192.857	3.57143
Dox	8	L-R_forelimbs	0.5	180	4.16667
Dox	9	L-R_forelimbs	0.478261	172.174	4.34783
Dox	9	L-R_forelimbs	0.521739	187.826	4.34783
Dox	9	L-R_forelimbs	0.933333	336	6.66667
Dox	9	L-R_forelimbs	0.461538	166.154	3.84615
Dox	9	L-R_forelimbs	0.9375	337.5	6.25
Dox	9	L-R_forelimbs	0.764706	275.294	5.88235
Dox	9	L-R_forelimbs	0.611111	220	2.77778
Dox	9	L-R_forelimbs	0.617647	222.353	2.94118
Dox	9	L-R_forelimbs	0.333333	120	4.7619
Dox	9	L-R_forelimbs	0.4	144	5
Dox	10	L-R_forelimbs	0.580645	209.032	3.22581
Dox	10	L-R_forelimbs	0.425	153	2.5
Dox	10	L-R_forelimbs	0.607143	218.571	3.57143
Dox	10	L-R_forelimbs	0.666667	240	5.55556
Dox	10	L-R_forelimbs	0.764706	275.294	5.88235
Dox	10	L-R_forelimbs	0.111111	40	5.55556
Dox	10	L-R_forelimbs	0.235294	84.7059	5.88235
Dox	10	L-R_forelimbs	0.8	288	5
Dox	10	L-R_forelimbs	0.882353	317.647	5.88235
Dox	12	L-R_forelimbs	0.37037	133.333	3.7037
Dox	12	L-R_forelimbs	0.526316	189.474	5.26316
Dox	12	L-R_forelimbs	0.307692	110.769	3.84615
Dox	12	L-R_forelimbs	0.275862	99.3103	3.44828
Dox	12	L-R_forelimbs	0.52381	188.571	4.7619
Dox	12	L-R_forelimbs	0.52381	188.571	4.7619
Dox	12	L-R_forelimbs	0.263158	94.7368	5.26316
Dox	12	L-R_forelimbs	0.380952	137.143	4.7619
Dox	12	L-R_forelimbs	0.192308	69.2308	3.84615
Dox	12	L-R_forelimbs	0.35	126	5
Dox	13	L-R_forelimbs	0.533333	192	3.33333
Dox	13	L-R_forelimbs	0.515152	185.455	3.0303
Dox	13	L-R_forelimbs	0.541667	195	4.16667
Dox	13	L-R_forelimbs	0.666667	240	4.16667
Dox	13	L-R_forelimbs	0.666667	240	4.7619
Dox	13	L-R_forelimbs	0.65	234	5
Dox	13	L-R_forelimbs	0.772727	278.182	4.54545
Dox	13	L-R_forelimbs	0.782609	281.739	4.34783
Dox	13	L-R_forelimbs	0.740741	266.667	3.7037
Dox	13	L-R_forelimbs	0.692308	249.231	3.84615
Dox	14	L-R_forelimbs	0.44	158.4	4
Dox	14	L-R_forelimbs	0.52	187.2	4
Dox	14	L-R_forelimbs	0.458333	165	4.16667
Dox	14	L-R_forelimbs	0.458333	165	4.16667
Dox	14	L-R_forelimbs	0.4	144	4
Dox	14	L-R_forelimbs	0.391304	140.87	4.34783
Dox	14	L-R_forelimbs	0.333333	120	4.7619
Dox	14	L-R_forelimbs	0.478261	172.174	4.34783
Dox	14	L-R_forelimbs	0.44	158.4	4
Dox	14	L-R_forelimbs	0.631579	227.368	5.26316
Dox	15	L-R_forelimbs	0.461538	166.154	3.84615
Dox	15	L-R_forelimbs	0.521739	187.826	4.34783
Dox	15	L-R_forelimbs	0.6	216	5
Dox	15	L-R_forelimbs	0.111111	40	5.55556
Dox	15	L-R_forelimbs	0.8125	292.5	6.25
Dox	15	L-R_forelimbs	0.8	288	5
Dox	15	L-R_forelimbs	0.8	288	6.66667
Dox	15	L-R_forelimbs	0.866667	312	6.66667
Dox	15	L-R_forelimbs	0.666667	240	6.66667
Dox	15	L-R_forelimbs	0.454545	163.636	3.0303
Dox	16	L-R_forelimbs	0.576923	207.692	3.84615
Dox	16	L-R_forelimbs	0.541667	195	4.16667
Dox	16	L-R_forelimbs	0.538462	193.846	3.84615
Dox	16	L-R_forelimbs	0.571429	205.714	4.7619
Dox	16	L-R_forelimbs	0.515152	185.455	3.0303
Dox	16	L-R_forelimbs	0.586207	211.034	3.44828
Dox	16	L-R_forelimbs	0.541667	195	3.84615
Dox	17	L-R_forelimbs	0.464286	167.143	3.57143
Dox	17	L-R_forelimbs	0.481481	173.333	3.7037
Dox	17	L-R_forelimbs	0.388889	140	5.55556
Dox	17	L-R_forelimbs	0.448276	161.379	3.44828
Dox	17	L-R_forelimbs	0.375	135	4.16667
Dox	17	L-R_forelimbs	0.5	180	4.54545
Dox	17	L-R_forelimbs	0.533333	192	3.33333
Dox	17	L-R_forelimbs	0.451613	162.581	3.22581
Dox	17	L-R_forelimbs	0.583333	210	4.16667
Dox	17	L-R_forelimbs	0.454545	163.636	4.54545
Dox	18	L-R_forelimbs	0.444444	160	3.7037
Dox	18	L-R_forelimbs	0.482759	173.793	3.44828
Dox	18	L-R_forelimbs	0.583333	210	4.16667
Dox	18	L-R_forelimbs	0.705882	254.118	5.88235
Dox	18	L-R_forelimbs	0.555556	200	3.7037
Dox	18	L-R_forelimbs	0.368421	132.632	5.26316
Dox	18	L-R_forelimbs	0.421053	151.579	5.26316
Dox	18	L-R_forelimbs	0.166667	60	5.55556
Dox	18	L-R_forelimbs	0.5	180	4.54545

## Sheet: L-R_hindlimbs
Time_ID	Animal_ID	Limb_ID	rawPhase	Deg	ref_r-HL_strideFreq(Hz)
Con	1	L-R_hindlimbs	0.470588	169.412	2.94118
Con	1	L-R_hindlimbs	0.454545	163.636	3.0303
Con	1	L-R_hindlimbs	0.5	180	2.94118
Con	1	L-R_hindlimbs	0.405405	145.946	2.7027
Con	1	L-R_hindlimbs	0.485714	174.857	2.85714
Con	1	L-R_hindlimbs	0.407407	146.667	3.7037
Con	1	L-R_hindlimbs	0.366667	132	3.33333
Con	1	L-R_hindlimbs	0.483871	174.194	3.22581
Con	1	L-R_hindlimbs	0.516129	185.806	3.22581
Con	2	L-R_hindlimbs	0.516129	185.806	3.22581
Con	2	L-R_hindlimbs	0.485714	174.857	2.85714
Con	2	L-R_hindlimbs	0.483871	174.194	3.22581
Con	2	L-R_hindlimbs	0.407407	146.667	3.7037
Con	2	L-R_hindlimbs	0.466667	168	3.33333
Con	2	L-R_hindlimbs	0.533333	192	3.33333
Con	2	L-R_hindlimbs	0.482759	173.793	3.44828
Con	2	L-R_hindlimbs	0.583333	210	4.16667
Con	2	L-R_hindlimbs	0.416667	150	4.16667
Con	2	L-R_hindlimbs	0.571429	205.714	3.57143
Con	7	L-R_hindlimbs	0.483871	174.194	3.22581
Con	7	L-R_hindlimbs	0.5625	202.5	3.125
Con	7	L-R_hindlimbs	0.695652	250.435	4.34783
Con	7	L-R_hindlimbs	0.56	201.6	4
Con	7	L-R_hindlimbs	0.666667	240	4.7619
Con	7	L-R_hindlimbs	0.32	115.2	4
Con	7	L-R_hindlimbs	0.5	180	4.54545
Con	8	L-R_hindlimbs	0.5	180	3.125
Con	8	L-R_hindlimbs	0.428571	154.286	2.85714
Con	8	L-R_hindlimbs	0.466667	168	3.33333
Con	8	L-R_hindlimbs	0.53125	191.25	3.125
Con	8	L-R_hindlimbs	0.448276	161.379	3.44828
Con	9	L-R_hindlimbs	0.576923	207.692	3.84615
Con	9	L-R_hindlimbs	0.566667	204	3.33333
Con	9	L-R_hindlimbs	0.692308	249.231	3.84615
Con	9	L-R_hindlimbs	0.5	180	3.33333
Con	9	L-R_hindlimbs	0.533333	192	3.33333
Con	9	L-R_hindlimbs	0.485714	174.857	2.85714
Con	9	L-R_hindlimbs	0.478261	172.174	4.34783
Con	9	L-R_hindlimbs	0.444444	160	3.7037
Con	10	L-R_hindlimbs	0.5	180	3.84615
Con	10	L-R_hindlimbs	0.407407	146.667	3.7037
Con	10	L-R_hindlimbs	0.407407	146.667	3.7037
Con	10	L-R_hindlimbs	0.625	225	4.16667
Con	10	L-R_hindlimbs	0.5	180	4.16667
Con	10	L-R_hindlimbs	0.521739	187.826	4.34783
Con	10	L-R_hindlimbs	0.416667	150	4.16667
Con	12	L-R_hindlimbs	0.545455	196.364	3.0303
Con	12	L-R_hindlimbs	0.448276	161.379	3.44828
Con	12	L-R_hindlimbs	0.466667	168	3.33333
Con	12	L-R_hindlimbs	0.548387	197.419	3.22581
Con	12	L-R_hindlimbs	0.5	180	3.84615
Con	12	L-R_hindlimbs	0.48	172.8	4
Con	12	L-R_hindlimbs	0.454545	163.636	3.0303
Con	12	L-R_hindlimbs	0.5	180	4.54545
Con	12	L-R_hindlimbs	0.5	180	3.57143
Con	12	L-R_hindlimbs	0.517241	186.207	3.44828
Con	13	L-R_hindlimbs	0.451613	162.581	3.22581
Con	13	L-R_hindlimbs	0.441176	158.824	2.94118
Con	13	L-R_hindlimbs	0.571429	205.714	3.57143
Con	13	L-R_hindlimbs	0.5	180	3.57143
Con	13	L-R_hindlimbs	0.583333	210	4.16667
Con	13	L-R_hindlimbs	0.583333	210	4.16667
Con	13	L-R_hindlimbs	0.409091	147.273	4.54545
Con	13	L-R_hindlimbs	0.5	180	3.33333
Con	13	L-R_hindlimbs	0.538462	193.846	3.84615
Con	13	L-R_hindlimbs	0.518519	186.667	3.7037
Con	14	L-R_hindlimbs	0.446809	160.851	2.12766
Con	14	L-R_hindlimbs	0.469388	168.98	2.04082
Con	14	L-R_hindlimbs	0.551724	198.621	3.44828
Con	14	L-R_hindlimbs	0.555556	200	3.7037
Con	14	L-R_hindlimbs	0.478261	172.174	4.34783
Con	14	L-R_hindlimbs	0.5	180	5
Con	14	L-R_hindlimbs	0.5	180	4.54545
Con	14	L-R_hindlimbs	0.482759	173.793	3.44828
Con	14	L-R_hindlimbs	0.580645	209.032	3.22581
Con	14	L-R_hindlimbs	0.5	180	5
Con	14	L-R_hindlimbs	0.541667	195	4.16667
Con	14	L-R_hindlimbs	0.590909	212.727	4.54545
Con	15	L-R_hindlimbs	0.470588	169.412	2.94118
Con	15	L-R_hindlimbs	0.515152	185.455	3.0303
Con	15	L-R_hindlimbs	0.576923	207.692	3.84615
Con	15	L-R_hindlimbs	0.5	180	3.84615
Con	15	L-R_hindlimbs	0.527778	190	2.77778
Con	15	L-R_hindlimbs	0.454545	163.636	4.54545
Con	15	L-R_hindlimbs	0.48	172.8	4
Con	15	L-R_hindlimbs	0.5	180	4.54545
Con	15	L-R_hindlimbs	0.48	172.8	4
Con	15	L-R_hindlimbs	0.470588	169.412	2.94118
Con	15	L-R_hindlimbs	0.382353	137.647	2.94118
Con	16	L-R_hindlimbs	0.608696	219.13	4.34783
Con	16	L-R_hindlimbs	0.5	180	4.16667
Con	16	L-R_hindlimbs	0.482759	173.793	3.44828
Con	16	L-R_hindlimbs	0.541667	195	4.16667
Con	16	L-R_hindlimbs	0.608696	219.13	4.34783
Con	16	L-R_hindlimbs	0.633333	228	3.33333
Con	16	L-R_hindlimbs	0.607143	218.571	3.57143
Con	16	L-R_hindlimbs	0.485714	174.857	2.85714
Con	16	L-R_hindlimbs	0.560976	201.951	2.43902
Con	16	L-R_hindlimbs	0.5	180	3.125
Con	16	L-R_hindlimbs	0.652174	234.783	4.34783
Con	17	L-R_hindlimbs	0.552632	198.947	2.63158
Con	17	L-R_hindlimbs	0.5	180	2.5
Con	17	L-R_hindlimbs	0.551724	198.621	3.44828
Con	17	L-R_hindlimbs	0.551724	198.621	3.44828
Con	17	L-R_hindlimbs	0.482759	173.793	3.44828
Con	17	L-R_hindlimbs	0.48	172.8	4
Con	17	L-R_hindlimbs	0.551724	198.621	3.44828
Con	17	L-R_hindlimbs	0.5	180	2.94118
Con	18	L-R_hindlimbs	0.533333	192	3.33333
Con	18	L-R_hindlimbs	0.551724	198.621	3.44828
Con	18	L-R_hindlimbs	0.48	172.8	4
Con	18	L-R_hindlimbs	0.464286	167.143	3.57143
Con	18	L-R_hindlimbs	0.606061	218.182	3.0303
Con	18	L-R_hindlimbs	0.518519	186.667	3.7037
Con	18	L-R_hindlimbs	0.44	158.4	4
Con	18	L-R_hindlimbs	0.5	180	4.16667
Con	18	L-R_hindlimbs	0.5	180	3.33333
Con	18	L-R_hindlimbs	0.5	180	4.16667
Con	18	L-R_hindlimbs	0.4	144	4
Con	18	L-R_hindlimbs	0.482759	173.793	3.44828
Con	1	L-R_hindlimbs	0.454545	163.636	3.0303
Con	1	L-R_hindlimbs	0.483871	174.194	3.22581
Con	1	L-R_hindlimbs	0.472222	170	2.77778
Con	1	L-R_hindlimbs	0.464286	167.143	3.57143
Con	1	L-R_hindlimbs	0.5	180	3.57143
Con	1	L-R_hindlimbs	0.466667	168	3.33333
Con	2	L-R_hindlimbs	0.5	180	3.125
Con	2	L-R_hindlimbs	0.555556	200	2.77778
Con	2	L-R_hindlimbs	0.545455	196.364	3.0303
Con	2	L-R_hindlimbs	0.5	180	2.94118
Con	2	L-R_hindlimbs	0.5	180	3.57143
Con	2	L-R_hindlimbs	0.535714	192.857	3.57143
Con	2	L-R_hindlimbs	0.517241	186.207	3.44828
Con	7	L-R_hindlimbs	0.527778	190	2.77778
Con	7	L-R_hindlimbs	0.566667	204	3.33333
Con	7	L-R_hindlimbs	0.5	180	3.125
Con	7	L-R_hindlimbs	0.512195	184.39	2.43902
Con	7	L-R_hindlimbs	0.64	230.4	4
Con	7	L-R_hindlimbs	0.5	180	3.84615
Con	7	L-R_hindlimbs	0.5	180	3.33333
Con	7	L-R_hindlimbs	0.5	180	3.84615
Con	7	L-R_hindlimbs	0.642857	231.429	3.57143
Con	7	L-R_hindlimbs	0.461538	166.154	3.84615
Con	7	L-R_hindlimbs	0.419355	150.968	3.22581
Con	7	L-R_hindlimbs	0.464286	167.143	3.57143
Con	8	L-R_hindlimbs	0.548387	197.419	3.22581
Con	8	L-R_hindlimbs	0.46875	168.75	3.125
Con	8	L-R_hindlimbs	0.583333	210	2.77778
Con	8	L-R_hindlimbs	0.575758	207.273	3.0303
Con	8	L-R_hindlimbs	0.5	180	2.77778
Con	8	L-R_hindlimbs	0.551724	198.621	3.44828
Con	8	L-R_hindlimbs	0.586207	211.034	3.44828
Con	8	L-R_hindlimbs	0.566667	204	3.33333
Con	9	L-R_hindlimbs	0.464286	167.143	3.57143
Con	9	L-R_hindlimbs	0.516129	185.806	3.22581
Con	9	L-R_hindlimbs	0.433333	156	3.33333
Con	9	L-R_hindlimbs	0.433333	156	3.33333
Con	9	L-R_hindlimbs	0.448276	161.379	3.44828
Con	9	L-R_hindlimbs	0.551724	198.621	3.44828
Con	9	L-R_hindlimbs	0.555556	200	3.7037
Con	10	L-R_hindlimbs	0.538462	193.846	3.84615
Con	10	L-R_hindlimbs	0.375	135	4.16667
Con	10	L-R_hindlimbs	0.538462	193.846	3.84615
Con	10	L-R_hindlimbs	0.545455	196.364	4.54545
Con	10	L-R_hindlimbs	0.461538	166.154	3.84615
Con	10	L-R_hindlimbs	0.375	135	4.16667
Con	10	L-R_hindlimbs	0.5	180	3.84615
Con	10	L-R_hindlimbs	0.481481	173.333	3.7037
Con	10	L-R_hindlimbs	0.518519	186.667	3.7037
Con	10	L-R_hindlimbs	0.56	201.6	4
Con	10	L-R_hindlimbs	0.545455	196.364	4.54545
Con	10	L-R_hindlimbs	0.590909	212.727	4.54545
Con	12	L-R_hindlimbs	0.407407	146.667	3.7037
Con	12	L-R_hindlimbs	0.451613	162.581	3.22581
Con	12	L-R_hindlimbs	0.5	180	4.54545
Con	12	L-R_hindlimbs	0.5	180	4.16667
Con	12	L-R_hindlimbs	0.434783	156.522	4.34783
Con	12	L-R_hindlimbs	0.521739	187.826	4.34783
Con	12	L-R_hindlimbs	0.517241	186.207	3.44828
Con	12	L-R_hindlimbs	0.516129	185.806	3.22581
Con	12	L-R_hindlimbs	0.485714	174.857	2.85714
Con	12	L-R_hindlimbs	0.423077	152.308	3.84615
Con	13	L-R_hindlimbs	0.545455	196.364	3.0303
Con	13	L-R_hindlimbs	0.512821	184.615	2.5641
Con	13	L-R_hindlimbs	0.535714	192.857	3.57143
Con	13	L-R_hindlimbs	0.555556	200	3.7037
Con	13	L-R_hindlimbs	0.566667	204	3.33333
Con	13	L-R_hindlimbs	0.652174	234.783	4.34783
Con	13	L-R_hindlimbs	0.571429	205.714	3.57143
Con	13	L-R_hindlimbs	0.645161	232.258	3.22581
Con	13	L-R_hindlimbs	0.566667	204	3.33333
Con	13	L-R_hindlimbs	0.571429	205.714	2.85714
Con	14	L-R_hindlimbs	0.46875	168.75	3.125
Con	14	L-R_hindlimbs	0.566667	204	3.33333
Con	14	L-R_hindlimbs	0.551724	198.621	3.44828
Con	14	L-R_hindlimbs	0.518519	186.667	3.7037
Con	14	L-R_hindlimbs	0.37931	136.552	3.44828
Con	14	L-R_hindlimbs	0.36	129.6	4
Con	14	L-R_hindlimbs	0.592593	213.333	3.7037
Con	14	L-R_hindlimbs	0.52	187.2	4
Con	14	L-R_hindlimbs	0.346154	124.615	3.84615
Con	15	L-R_hindlimbs	0.484848	174.545	3.0303
Con	15	L-R_hindlimbs	0.472222	170	2.77778
Con	15	L-R_hindlimbs	0.580645	209.032	3.22581
Con	15	L-R_hindlimbs	0.421053	151.579	2.63158
Con	15	L-R_hindlimbs	0.458333	165	4.16667
Con	15	L-R_hindlimbs	0.454545	163.636	4.54545
Con	15	L-R_hindlimbs	0.347826	125.217	4.34783
Con	15	L-R_hindlimbs	0.482759	173.793	3.44828
Con	15	L-R_hindlimbs	0.392857	141.429	3.57143
Con	16	L-R_hindlimbs	0.535714	192.857	3.57143
Con	16	L-R_hindlimbs	0.586207	211.034	3.44828
Con	16	L-R_hindlimbs	0.52	187.2	4
Con	16	L-R_hindlimbs	0.52	187.2	4
Con	16	L-R_hindlimbs	0.62963	226.667	3.7037
Con	16	L-R_hindlimbs	0.642857	231.429	3.57143
Con	16	L-R_hindlimbs	0.535714	192.857	3.57143
Con	16	L-R_hindlimbs	0.533333	192	3.33333
Con	16	L-R_hindlimbs	0.333333	120	2.77778
Con	17	L-R_hindlimbs	0.4375	157.5	3.125
Con	17	L-R_hindlimbs	0.371429	133.714	2.85714
Con	17	L-R_hindlimbs	0.483871	174.194	3.22581
Con	17	L-R_hindlimbs	0.441176	158.824	2.94118
Con	17	L-R_hindlimbs	0.457143	164.571	2.85714
Con	17	L-R_hindlimbs	0.516129	185.806	3.22581
Con	17	L-R_hindlimbs	0.486486	175.135	2.7027
Con	17	L-R_hindlimbs	0.464286	167.143	3.57143
Con	17	L-R_hindlimbs	0.4375	157.5	3.125
Con	17	L-R_hindlimbs	0.46875	168.75	3.125
Con	17	L-R_hindlimbs	0.5625	202.5	2.08333
Con	18	L-R_hindlimbs	0.545455	196.364	3.0303
Con	18	L-R_hindlimbs	0.5625	202.5	3.125
Con	18	L-R_hindlimbs	0.434783	156.522	4.34783
Con	18	L-R_hindlimbs	0.464286	167.143	3.57143
Con	18	L-R_hindlimbs	0.542857	195.429	2.85714
Con	18	L-R_hindlimbs	0.5	180	4.54545
Con	18	L-R_hindlimbs	0.458333	165	4.16667
Con	18	L-R_hindlimbs	0.444444	160	3.7037
Con	18	L-R_hindlimbs	0.454545	163.636	4.54545
Con	18	L-R_hindlimbs	0.478261	172.174	4.34783
Con	1	L-R_hindlimbs	0.470588	169.412	2.94118
Con	1	L-R_hindlimbs	0.5	180	2.77778
Con	1	L-R_hindlimbs	0.483871	174.194	3.22581
Con	1	L-R_hindlimbs	0.464286	167.143	3.57143
Con	1	L-R_hindlimbs	0.46875	168.75	3.125
Con	1	L-R_hindlimbs	0.486486	175.135	2.7027
Con	1	L-R_hindlimbs	0.529412	190.588	2.94118
Con	1	L-R_hindlimbs	0.5	180	2.17391
Con	1	L-R_hindlimbs	0.512195	184.39	2.43902
Con	1	L-R_hindlimbs	0.451613	162.581	3.22581
Con	1	L-R_hindlimbs	0.46875	168.75	3.125
Con	2	L-R_hindlimbs	0.461538	166.154	3.84615
Con	2	L-R_hindlimbs	0.5	180	3.57143
Con	2	L-R_hindlimbs	0.5	180	4.54545
Con	2	L-R_hindlimbs	0.470588	169.412	2.94118
Con	2	L-R_hindlimbs	0.5	180	2.77778
Con	2	L-R_hindlimbs	0.466667	168	3.33333
Con	2	L-R_hindlimbs	0.5	180	3.57143
Con	2	L-R_hindlimbs	0.392857	141.429	3.57143
Con	7	L-R_hindlimbs	0.484848	174.545	3.0303
Con	7	L-R_hindlimbs	0.512821	184.615	2.5641
Con	7	L-R_hindlimbs	0.615385	221.538	1.92308
Con	7	L-R_hindlimbs	0.377358	135.849	1.88679
Con	7	L-R_hindlimbs	0.510638	183.83	2.12766
Con	7	L-R_hindlimbs	0.485714	174.857	2.85714
Con	7	L-R_hindlimbs	0.612903	220.645	3.22581
Con	7	L-R_hindlimbs	0.516129	185.806	3.22581
Con	7	L-R_hindlimbs	0.564103	203.077	2.5641
Con	7	L-R_hindlimbs	0.534884	192.558	2.32558
Con	7	L-R_hindlimbs	0.666667	240	3.7037
Con	8	L-R_hindlimbs	0.533333	192	3.33333
Con	8	L-R_hindlimbs	0.527778	190	2.77778
Con	8	L-R_hindlimbs	0.517241	186.207	3.44828
Con	8	L-R_hindlimbs	0.575758	207.273	3.0303
Con	8	L-R_hindlimbs	0.548387	197.419	3.22581
Con	8	L-R_hindlimbs	0.536585	193.171	2.43902
Con	8	L-R_hindlimbs	0.447368	161.053	2.63158
Con	8	L-R_hindlimbs	0.5	180	3.125
Con	8	L-R_hindlimbs	0.5	180	4.16667
Con	9	L-R_hindlimbs	0.545455	196.364	4.54545
Con	9	L-R_hindlimbs	0.478261	172.174	4.34783
Con	9	L-R_hindlimbs	0.4375	157.5	3.125
Con	9	L-R_hindlimbs	0.37931	136.552	3.44828
Con	9	L-R_hindlimbs	0.529412	190.588	2.94118
Con	9	L-R_hindlimbs	0.4	144	4
Con	9	L-R_hindlimbs	0.517241	186.207	3.44828
Con	9	L-R_hindlimbs	0.481481	173.333	3.7037
Con	9	L-R_hindlimbs	0.542857	195.429	2.85714
Con	10	L-R_hindlimbs	0.517241	186.207	3.44828
Con	10	L-R_hindlimbs	0.458333	165	4.16667
Con	10	L-R_hindlimbs	0.533333	192	3.33333
Con	10	L-R_hindlimbs	0.46875	168.75	3.125
Con	10	L-R_hindlimbs	0.461538	166.154	2.5641
Con	10	L-R_hindlimbs	0.428571	154.286	2.85714
Con	10	L-R_hindlimbs	0.416667	150	2.77778
Con	10	L-R_hindlimbs	0.363636	130.909	4.54545
Con	10	L-R_hindlimbs	0.458333	165	4.16667
Con	10	L-R_hindlimbs	0.44	158.4	4
Con	12	L-R_hindlimbs	0.461538	166.154	3.84615
Con	12	L-R_hindlimbs	0.304348	109.565	4.34783
Con	12	L-R_hindlimbs	0.346154	124.615	3.84615
Con	12	L-R_hindlimbs	0.566667	204	3.33333
Con	12	L-R_hindlimbs	0.512195	184.39	2.43902
Con	12	L-R_hindlimbs	0.483871	174.194	3.22581
Con	12	L-R_hindlimbs	0.575758	207.273	3.0303
Con	12	L-R_hindlimbs	0.533333	192	3.33333
Con	12	L-R_hindlimbs	0.576923	207.692	3.84615
Con	13	L-R_hindlimbs	0.413793	148.966	3.44828
Con	13	L-R_hindlimbs	0.516129	185.806	3.22581
Con	13	L-R_hindlimbs	0.592593	213.333	3.7037
Con	13	L-R_hindlimbs	0.466667	168	3.33333
Con	13	L-R_hindlimbs	0.521739	187.826	4.34783
Con	13	L-R_hindlimbs	0.458333	165	4.16667
Con	13	L-R_hindlimbs	0.46875	168.75	3.125
Con	13	L-R_hindlimbs	0.481481	173.333	3.7037
Con	14	L-R_hindlimbs	0.5	180	3.84615
Con	14	L-R_hindlimbs	0.413793	148.966	3.44828
Con	14	L-R_hindlimbs	0.375	135	4.16667
Con	14	L-R_hindlimbs	0.416667	150	4.16667
Con	14	L-R_hindlimbs	0.421053	151.579	2.63158
Con	14	L-R_hindlimbs	0.435897	156.923	2.5641
Con	14	L-R_hindlimbs	0.5	180	4.16667
Con	14	L-R_hindlimbs	0.413793	148.966	3.44828
Con	15	L-R_hindlimbs	0.5	180	4.16667
Con	15	L-R_hindlimbs	0.583333	210	4.16667
Con	15	L-R_hindlimbs	0.444444	160	2.77778
Con	15	L-R_hindlimbs	0.463415	166.829	2.43902
Con	15	L-R_hindlimbs	0.45	162	2.5
Con	15	L-R_hindlimbs	0.451613	162.581	3.22581
Con	15	L-R_hindlimbs	0.32	115.2	4
Con	15	L-R_hindlimbs	0.333333	120	4.16667
Con	16	L-R_hindlimbs	0.533333	192	3.33333
Con	16	L-R_hindlimbs	0.580645	209.032	3.22581
Con	16	L-R_hindlimbs	0.5	180	2.94118
Con	16	L-R_hindlimbs	0.608696	219.13	4.34783
Con	16	L-R_hindlimbs	0.547619	197.143	2.38095
Con	16	L-R_hindlimbs	0.545455	196.364	3.0303
Con	16	L-R_hindlimbs	0.533333	192	3.33333
Con	16	L-R_hindlimbs	0.607143	218.571	3.57143
Con	16	L-R_hindlimbs	0.535714	192.857	3.57143
Con	16	L-R_hindlimbs	0.470588	169.412	2.94118
Con	17	L-R_hindlimbs	0.481481	173.333	3.7037
Con	17	L-R_hindlimbs	0.5	180	3.84615
Con	17	L-R_hindlimbs	0.366667	132	3.33333
Con	17	L-R_hindlimbs	0.4375	157.5	3.125
Con	17	L-R_hindlimbs	0.363636	130.909	2.27273
Con	17	L-R_hindlimbs	0.428571	154.286	2.85714
Con	17	L-R_hindlimbs	0.464286	167.143	3.57143
Con	17	L-R_hindlimbs	0.52	187.2	4
Con	17	L-R_hindlimbs	0.454545	163.636	3.0303
Con	17	L-R_hindlimbs	0.363636	130.909	3.0303
Con	18	L-R_hindlimbs	0.518519	186.667	3.7037
Con	18	L-R_hindlimbs	0.548387	197.419	3.22581
Con	18	L-R_hindlimbs	0.347826	125.217	4.34783
Con	18	L-R_hindlimbs	0.466667	168	3.33333
Con	18	L-R_hindlimbs	0.419355	150.968	3.22581
Con	18	L-R_hindlimbs	0.428571	154.286	4.7619
Con	18	L-R_hindlimbs	0.517241	186.207	3.44828
Con	18	L-R_hindlimbs	0.571429	205.714	4.7619
Con	18	L-R_hindlimbs	0.590909	212.727	4.54545
Con	1	L-R_hindlimbs	0.472222	170	2.77778
Con	1	L-R_hindlimbs	0.5	180	2.94118
Con	1	L-R_hindlimbs	0.516129	185.806	3.22581
Con	1	L-R_hindlimbs	0.535714	192.857	3.57143
Con	1	L-R_hindlimbs	0.5	180	2.94118
Con	1	L-R_hindlimbs	0.5	180	2.94118
Con	1	L-R_hindlimbs	0.5	180	2.77778
Con	1	L-R_hindlimbs	0.53125	191.25	3.125
Con	1	L-R_hindlimbs	0.5	180	3.33333
Con	2	L-R_hindlimbs	0.423077	152.308	3.84615
Con	2	L-R_hindlimbs	0.5	180	3.33333
Con	2	L-R_hindlimbs	0.48	172.8	4
Con	2	L-R_hindlimbs	0.513514	184.865	2.7027
Con	2	L-R_hindlimbs	0.5	180	2.27273
Con	2	L-R_hindlimbs	0.512821	184.615	2.5641
Con	2	L-R_hindlimbs	0.533333	192	3.33333
Con	2	L-R_hindlimbs	0.545455	196.364	3.0303
Con	2	L-R_hindlimbs	0.545455	196.364	3.0303
Con	2	L-R_hindlimbs	0.457143	164.571	2.85714
Con	7	L-R_hindlimbs	0.485714	174.857	2.85714
Con	7	L-R_hindlimbs	0.527778	190	2.77778
Con	7	L-R_hindlimbs	0.53125	191.25	3.125
Con	7	L-R_hindlimbs	0.481481	173.333	3.7037
Con	7	L-R_hindlimbs	0.5	180	2.63158
Con	7	L-R_hindlimbs	0.519231	186.923	1.92308
Con	7	L-R_hindlimbs	0.518519	186.667	3.7037
Con	7	L-R_hindlimbs	0.566667	204	3.33333
Con	8	L-R_hindlimbs	0.448276	161.379	3.44828
Con	8	L-R_hindlimbs	0.46875	168.75	3.125
Con	8	L-R_hindlimbs	0.681818	245.455	4.54545
Con	8	L-R_hindlimbs	0.6	216	4
Con	8	L-R_hindlimbs	0.6	216	3.33333
Con	8	L-R_hindlimbs	0.4	144	4
Con	8	L-R_hindlimbs	0.541667	195	4.16667
Con	8	L-R_hindlimbs	0.5	180	3.125
Con	9	L-R_hindlimbs	0.444444	160	3.7037
Con	9	L-R_hindlimbs	0.461538	166.154	3.84615
Con	9	L-R_hindlimbs	0.55	198	5
Con	9	L-R_hindlimbs	0.52381	188.571	4.7619
Con	9	L-R_hindlimbs	0.681818	245.455	4.54545
Con	9	L-R_hindlimbs	0.540541	194.595	2.7027
Con	9	L-R_hindlimbs	0.5	180	4.16667
Con	10	L-R_hindlimbs	0.416667	150	4.16667
Con	10	L-R_hindlimbs	0.363636	130.909	4.54545
Con	10	L-R_hindlimbs	0.565217	203.478	4.34783
Con	10	L-R_hindlimbs	0.444444	160	2.77778
Con	12	L-R_hindlimbs	0.444444	160	3.7037
Con	12	L-R_hindlimbs	0.481481	173.333	3.7037
Con	12	L-R_hindlimbs	0.551724	198.621	3.44828
Con	12	L-R_hindlimbs	0.433333	156	3.33333
Con	12	L-R_hindlimbs	0.366667	132	3.33333
Con	12	L-R_hindlimbs	0.517241	186.207	3.44828
Con	12	L-R_hindlimbs	0.652174	234.783	4.34783
Con	12	L-R_hindlimbs	0.444444	160	3.7037
Con	12	L-R_hindlimbs	0.5	180	3.125
Con	13	L-R_hindlimbs	0.540541	194.595	2.7027
Con	13	L-R_hindlimbs	0.617647	222.353	2.94118
Con	13	L-R_hindlimbs	0.547619	197.143	2.38095
Con	13	L-R_hindlimbs	0.553191	199.149	2.12766
Con	13	L-R_hindlimbs	0.571429	205.714	3.57143
Con	13	L-R_hindlimbs	0.588235	211.765	2.94118
Con	13	L-R_hindlimbs	0.516129	185.806	3.22581
Con	13	L-R_hindlimbs	0.566667	204	3.33333
Con	13	L-R_hindlimbs	0.592593	213.333	3.7037
Con	13	L-R_hindlimbs	0.608696	219.13	4.34783
Con	13	L-R_hindlimbs	0.527778	190	2.77778
Con	13	L-R_hindlimbs	0.548387	197.419	3.22581
Con	14	L-R_hindlimbs	0.40625	146.25	3.125
Con	14	L-R_hindlimbs	0.447368	161.053	2.63158
Con	14	L-R_hindlimbs	0.433333	156	3.33333
Con	14	L-R_hindlimbs	0.46875	168.75	3.125
Con	14	L-R_hindlimbs	0.333333	120	4.16667
Con	14	L-R_hindlimbs	0.444444	160	3.7037
Con	14	L-R_hindlimbs	0.5	180	2.77778
Con	14	L-R_hindlimbs	0.423077	152.308	3.84615
Con	14	L-R_hindlimbs	0.428571	154.286	3.57143
Con	15	L-R_hindlimbs	0.465116	167.442	2.32558
Con	15	L-R_hindlimbs	0.55814	200.93	2.32558
Con	15	L-R_hindlimbs	0.511628	184.186	2.32558
Con	15	L-R_hindlimbs	0.5	180	3.125
Con	15	L-R_hindlimbs	0.487805	175.61	2.43902
Con	15	L-R_hindlimbs	0.535714	192.857	3.57143
Con	15	L-R_hindlimbs	0.466667	168	3.33333
Con	15	L-R_hindlimbs	0.46875	168.75	3.125
Con	15	L-R_hindlimbs	0.5	180	3.33333
Con	15	L-R_hindlimbs	0.428571	154.286	3.57143
Con	15	L-R_hindlimbs	0.461538	166.154	3.84615
Con	16	L-R_hindlimbs	0.6	216	3.33333
Con	16	L-R_hindlimbs	0.551724	198.621	3.44828
Con	16	L-R_hindlimbs	0.678571	244.286	3.57143
Con	16	L-R_hindlimbs	0.592593	213.333	3.7037
Con	16	L-R_hindlimbs	0.586207	211.034	3.44828
Con	16	L-R_hindlimbs	0.653846	235.385	3.84615
Con	16	L-R_hindlimbs	0.627907	226.047	2.32558
Con	16	L-R_hindlimbs	0.518519	186.667	3.7037
Con	16	L-R_hindlimbs	0.625	225	3.125
Con	16	L-R_hindlimbs	0.566667	204	3.33333
Con	17	L-R_hindlimbs	0.470588	169.412	2.94118
Con	17	L-R_hindlimbs	0.470588	169.412	2.94118
Con	17	L-R_hindlimbs	0.464286	167.143	3.57143
Con	17	L-R_hindlimbs	0.518519	186.667	3.7037
Con	17	L-R_hindlimbs	0.580645	209.032	3.22581
Con	17	L-R_hindlimbs	0.441176	158.824	2.94118
Con	17	L-R_hindlimbs	0.486486	175.135	2.7027
Con	17	L-R_hindlimbs	0.416667	150	4.16667
Con	17	L-R_hindlimbs	0.575758	207.273	3.0303
Con	17	L-R_hindlimbs	0.459459	165.405	2.7027
Con	17	L-R_hindlimbs	0.423077	152.308	3.84615
Con	17	L-R_hindlimbs	0.517241	186.207	3.44828
Con	18	L-R_hindlimbs	0.6	216	3.33333
Con	18	L-R_hindlimbs	0.522727	188.182	2.27273
Con	18	L-R_hindlimbs	0.54	194.4	2
Con	18	L-R_hindlimbs	0.533333	192	3.33333
Con	18	L-R_hindlimbs	0.607143	218.571	3.57143
Con	18	L-R_hindlimbs	0.482759	173.793	3.44828
Con	18	L-R_hindlimbs	0.46875	168.75	3.125
Con	18	L-R_hindlimbs	0.458333	165	4.16667
Con	18	L-R_hindlimbs	0.44	158.4	4
Con	18	L-R_hindlimbs	0.44	158.4	4
Con	18	L-R_hindlimbs	0.448276	161.379	3.44828
Dox	1	L-R_hindlimbs	0.516129	185.806	3.22581
Dox	1	L-R_hindlimbs	0.466667	168	3.33333
Dox	1	L-R_hindlimbs	0.448276	161.379	3.44828
Dox	1	L-R_hindlimbs	0.44	158.4	4
Dox	1	L-R_hindlimbs	0.484848	174.545	3.0303
Dox	1	L-R_hindlimbs	0.551724	198.621	3.44828
Dox	2	L-R_hindlimbs	0.441176	158.824	2.94118
Dox	2	L-R_hindlimbs	0.5	180	3.125
Dox	2	L-R_hindlimbs	0.535714	192.857	3.57143
Dox	2	L-R_hindlimbs	0.607143	218.571	3.57143
Dox	2	L-R_hindlimbs	0.481481	173.333	3.7037
Dox	2	L-R_hindlimbs	0.5	180	3.84615
Dox	2	L-R_hindlimbs	0.416667	150	4.16667
Dox	2	L-R_hindlimbs	0.461538	166.154	3.84615
Dox	2	L-R_hindlimbs	0.5	180	3.57143
Dox	7	L-R_hindlimbs	0.413793	148.966	3.44828
Dox	7	L-R_hindlimbs	0.40625	146.25	3.125
Dox	7	L-R_hindlimbs	0.538462	193.846	3.84615
Dox	7	L-R_hindlimbs	0.538462	193.846	3.84615
Dox	7	L-R_hindlimbs	0.576923	207.692	3.84615
Dox	7	L-R_hindlimbs	0.612903	220.645	3.22581
Dox	7	L-R_hindlimbs	0.515152	185.455	3.0303
Dox	7	L-R_hindlimbs	0.589744	212.308	2.5641
Dox	8	L-R_hindlimbs	0.46875	168.75	3.125
Dox	8	L-R_hindlimbs	0.567568	204.324	2.7027
Dox	8	L-R_hindlimbs	0.5625	202.5	3.125
Dox	8	L-R_hindlimbs	0.62963	226.667	3.7037
Dox	8	L-R_hindlimbs	0.464286	167.143	3.57143
Dox	8	L-R_hindlimbs	0.484848	174.545	3.0303
Dox	8	L-R_hindlimbs	0.540541	194.595	2.7027
Dox	8	L-R_hindlimbs	0.424242	152.727	3.0303
Dox	8	L-R_hindlimbs	0.526316	189.474	2.63158
Dox	8	L-R_hindlimbs	0.525	189	2.5
Dox	9	L-R_hindlimbs	0.470588	169.412	2.94118
Dox	9	L-R_hindlimbs	0.527778	190	2.77778
Dox	9	L-R_hindlimbs	0.5	180	2.63158
Dox	9	L-R_hindlimbs	0.461538	166.154	3.84615
Dox	9	L-R_hindlimbs	0.5	180	3.84615
Dox	9	L-R_hindlimbs	0.466667	168	3.33333
Dox	9	L-R_hindlimbs	0.515152	185.455	3.0303
Dox	9	L-R_hindlimbs	0.4	144	3.33333
Dox	9	L-R_hindlimbs	0.433333	156	3.33333
Dox	9	L-R_hindlimbs	0.518519	186.667	3.7037
Dox	10	L-R_hindlimbs	0.46875	168.75	3.125
Dox	10	L-R_hindlimbs	0.407407	146.667	3.7037
Dox	10	L-R_hindlimbs	0.481481	173.333	3.7037
Dox	10	L-R_hindlimbs	0.482759	173.793	3.44828
Dox	10	L-R_hindlimbs	0.636364	229.091	4.54545
Dox	10	L-R_hindlimbs	0.6	216	4
Dox	10	L-R_hindlimbs	0.478261	172.174	4.34783
Dox	10	L-R_hindlimbs	0.25	90	5
Dox	10	L-R_hindlimbs	0.666667	240	4.16667
Dox	10	L-R_hindlimbs	0.590909	212.727	4.54545
Dox	10	L-R_hindlimbs	0.238095	85.7143	4.7619
Dox	10	L-R_hindlimbs	0.173913	62.6087	4.34783
Dox	10	L-R_hindlimbs	0.230769	83.0769	3.84615
Dox	12	L-R_hindlimbs	0.555556	200	3.7037
Dox	12	L-R_hindlimbs	0.538462	193.846	3.84615
Dox	12	L-R_hindlimbs	0.52	187.2	4
Dox	12	L-R_hindlimbs	0.352941	127.059	2.94118
Dox	12	L-R_hindlimbs	0.5625	202.5	3.125
Dox	12	L-R_hindlimbs	0.733333	264	3.33333
Dox	13	L-R_hindlimbs	0.5	180	3.57143
Dox	13	L-R_hindlimbs	0.533333	192	3.33333
Dox	13	L-R_hindlimbs	0.516129	185.806	3.22581
Dox	13	L-R_hindlimbs	0.518519	186.667	3.7037
Dox	13	L-R_hindlimbs	0.576923	207.692	3.84615
Dox	13	L-R_hindlimbs	0.642857	231.429	3.57143
Dox	13	L-R_hindlimbs	0.382353	137.647	2.94118
Dox	13	L-R_hindlimbs	0.647059	232.941	2.94118
Dox	13	L-R_hindlimbs	0.5	180	3.33333
Dox	14	L-R_hindlimbs	0.4375	157.5	3.125
Dox	14	L-R_hindlimbs	0.481481	173.333	3.7037
Dox	14	L-R_hindlimbs	0.458333	165	4.16667
Dox	14	L-R_hindlimbs	0.518519	186.667	3.7037
Dox	14	L-R_hindlimbs	0.65	234	5
Dox	14	L-R_hindlimbs	0.47619	171.429	4.7619
Dox	14	L-R_hindlimbs	0.56	201.6	4
Dox	14	L-R_hindlimbs	0.458333	165	4.16667
Dox	14	L-R_hindlimbs	0.441176	158.824	2.94118
Dox	14	L-R_hindlimbs	0.464286	167.143	3.57143
Dox	15	L-R_hindlimbs	0.444444	160	3.7037
Dox	15	L-R_hindlimbs	0.478261	172.174	4.34783
Dox	15	L-R_hindlimbs	0.607143	218.571	3.57143
Dox	15	L-R_hindlimbs	0.347826	125.217	4.34783
Dox	15	L-R_hindlimbs	0.451613	162.581	3.22581
Dox	15	L-R_hindlimbs	0.545455	196.364	3.0303
Dox	15	L-R_hindlimbs	0.105263	37.8947	5.26316
Dox	15	L-R_hindlimbs	0.15	54	5
Dox	16	L-R_hindlimbs	0.708333	255	4.16667
Dox	16	L-R_hindlimbs	0.791667	285	4.16667
Dox	16	L-R_hindlimbs	0.5	180	3.57143
Dox	16	L-R_hindlimbs	0.483871	174.194	3.22581
Dox	16	L-R_hindlimbs	0.964286	347.143	3.57143
Dox	16	L-R_hindlimbs	0.142857	51.4286	3.57143
Dox	16	L-R_hindlimbs	0.142857	51.4286	4.7619
Dox	16	L-R_hindlimbs	0.607143	218.571	3.57143
Dox	16	L-R_hindlimbs	0.62069	223.448	3.44828
Dox	16	L-R_hindlimbs	0.695652	250.435	4.34783
Dox	16	L-R_hindlimbs	0.761905	274.286	4.7619
Dox	17	L-R_hindlimbs	0.482759	173.793	3.44828
Dox	17	L-R_hindlimbs	0.481481	173.333	3.7037
Dox	17	L-R_hindlimbs	0.125	45	3.125
Dox	17	L-R_hindlimbs	0.121951	43.9024	2.43902
Dox	17	L-R_hindlimbs	0.428571	154.286	4.7619
Dox	17	L-R_hindlimbs	0.625	225	4.16667
Dox	17	L-R_hindlimbs	0.483871	174.194	3.22581
Dox	17	L-R_hindlimbs	0.44	158.4	4
Dox	18	L-R_hindlimbs	0.521739	187.826	4.34783
Dox	18	L-R_hindlimbs	0.666667	240	4.7619
Dox	18	L-R_hindlimbs	0.65	234	5
Dox	18	L-R_hindlimbs	0.333333	120	5.55556
Dox	18	L-R_hindlimbs	0.533333	192	3.33333
Dox	18	L-R_hindlimbs	0.567568	204.324	2.7027
Dox	18	L-R_hindlimbs	0.485714	174.857	2.85714
Dox	18	L-R_hindlimbs	0.631579	227.368	2.63158
Dox	18	L-R_hindlimbs	0.529412	190.588	2.94118
Dox	18	L-R_hindlimbs	0.625	225	3.125
Dox	18	L-R_hindlimbs	0.56	201.6	4
Dox	18	L-R_hindlimbs	0.35	126	5
Dox	1	L-R_hindlimbs	0.545455	196.364	3.0303
Dox	1	L-R_hindlimbs	0.535714	192.857	3.57143
Dox	1	L-R_hindlimbs	0.53125	191.25	3.125
Dox	1	L-R_hindlimbs	0.444444	160	3.7037
Dox	1	L-R_hindlimbs	0.548387	197.419	3.22581
Dox	1	L-R_hindlimbs	0.545455	196.364	3.0303
Dox	1	L-R_hindlimbs	0.545455	196.364	3.0303
Dox	1	L-R_hindlimbs	0.484848	174.545	3.0303
Dox	1	L-R_hindlimbs	0.586207	211.034	3.44828
Dox	1	L-R_hindlimbs	0.62069	223.448	3.44828
Dox	2	L-R_hindlimbs	0.586207	211.034	3.44828
Dox	2	L-R_hindlimbs	0.548387	197.419	3.22581
Dox	2	L-R_hindlimbs	0.538462	193.846	2.5641
Dox	2	L-R_hindlimbs	0.529412	190.588	2.94118
Dox	2	L-R_hindlimbs	0.485714	174.857	2.85714
Dox	2	L-R_hindlimbs	0.487805	175.61	2.43902
Dox	2	L-R_hindlimbs	0.514286	185.143	2.85714
Dox	2	L-R_hindlimbs	0.555556	200	3.7037
Dox	2	L-R_hindlimbs	0.428571	154.286	2.85714
Dox	2	L-R_hindlimbs	0.571429	205.714	2.38095
Dox	7	L-R_hindlimbs	0.483871	174.194	3.22581
Dox	7	L-R_hindlimbs	0.62069	223.448	3.44828
Dox	7	L-R_hindlimbs	0.594595	214.054	2.7027
Dox	7	L-R_hindlimbs	0.411765	148.235	2.94118
Dox	7	L-R_hindlimbs	0.534884	192.558	2.32558
Dox	7	L-R_hindlimbs	0.384615	138.462	2.5641
Dox	7	L-R_hindlimbs	0.486486	175.135	2.7027
Dox	7	L-R_hindlimbs	0.513514	184.865	2.7027
Dox	7	L-R_hindlimbs	0.5	180	2.94118
Dox	7	L-R_hindlimbs	0.653846	235.385	3.84615
Dox	7	L-R_hindlimbs	0.633333	228	3.33333
Dox	8	L-R_hindlimbs	0.567568	204.324	2.7027
Dox	8	L-R_hindlimbs	0.451613	162.581	3.22581
Dox	8	L-R_hindlimbs	0.478261	172.174	4.34783
Dox	8	L-R_hindlimbs	0.481481	173.333	3.7037
Dox	8	L-R_hindlimbs	0.612903	220.645	3.22581
Dox	8	L-R_hindlimbs	0.607143	218.571	3.57143
Dox	8	L-R_hindlimbs	0.485714	174.857	2.85714
Dox	8	L-R_hindlimbs	0.575758	207.273	3.0303
Dox	8	L-R_hindlimbs	0.53125	191.25	3.125
Dox	9	L-R_hindlimbs	0.481481	173.333	3.7037
Dox	9	L-R_hindlimbs	0.52	187.2	4
Dox	9	L-R_hindlimbs	0.4	144	5
Dox	9	L-R_hindlimbs	0.428571	154.286	4.7619
Dox	9	L-R_hindlimbs	0.1	36	5
Dox	9	L-R_hindlimbs	0.217391	78.2609	4.34783
Dox	9	L-R_hindlimbs	0.909091	327.273	4.54545
Dox	9	L-R_hindlimbs	0.259259	93.3333	3.7037
Dox	9	L-R_hindlimbs	0.275862	99.3103	3.44828
Dox	9	L-R_hindlimbs	0.466667	168	3.33333
Dox	10	L-R_hindlimbs	0.416667	150	4.16667
Dox	10	L-R_hindlimbs	0.458333	165	4.16667
Dox	10	L-R_hindlimbs	0.5	180	3.57143
Dox	10	L-R_hindlimbs	0.571429	205.714	2.85714
Dox	10	L-R_hindlimbs	0.85	306	5
Dox	10	L-R_hindlimbs	0.681818	245.455	4.54545
Dox	10	L-R_hindlimbs	0.888889	320	5.55556
Dox	10	L-R_hindlimbs	0.952381	342.857	4.7619
Dox	10	L-R_hindlimbs	0.404762	145.714	2.38095
Dox	10	L-R_hindlimbs	0.592593	213.333	3.7037
Dox	12	L-R_hindlimbs	0.416667	150	4.16667
Dox	12	L-R_hindlimbs	0.458333	165	4.16667
Dox	12	L-R_hindlimbs	0.457143	164.571	2.85714
Dox	12	L-R_hindlimbs	0.5	180	2.5
Dox	12	L-R_hindlimbs	0.361111	130	2.77778
Dox	12	L-R_hindlimbs	0.472222	170	2.77778
Dox	12	L-R_hindlimbs	0.463415	166.829	2.43902
Dox	12	L-R_hindlimbs	0.65	234	5
Dox	12	L-R_hindlimbs	0.56	201.6	4
Dox	13	L-R_hindlimbs	0.708333	255	4.16667
Dox	13	L-R_hindlimbs	0.653846	235.385	3.84615
Dox	13	L-R_hindlimbs	0.727273	261.818	4.54545
Dox	13	L-R_hindlimbs	0.68	244.8	4
Dox	13	L-R_hindlimbs	0.56	201.6	4
Dox	13	L-R_hindlimbs	0.631579	227.368	5.26316
Dox	14	L-R_hindlimbs	0.387097	139.355	3.22581
Dox	14	L-R_hindlimbs	0.454545	163.636	3.0303
Dox	14	L-R_hindlimbs	0.4	144	4
Dox	14	L-R_hindlimbs	0.511628	184.186	2.32558
Dox	14	L-R_hindlimbs	0.394737	142.105	2.63158
Dox	14	L-R_hindlimbs	0.484848	174.545	3.0303
Dox	14	L-R_hindlimbs	0.5	180	4.54545
Dox	14	L-R_hindlimbs	0.583333	210	4.16667
Dox	14	L-R_hindlimbs	0.538462	193.846	3.84615
Dox	15	L-R_hindlimbs	0.481481	173.333	3.7037
Dox	15	L-R_hindlimbs	0.434783	156.522	4.34783
Dox	15	L-R_hindlimbs	0.190476	68.5714	4.7619
Dox	15	L-R_hindlimbs	0.190476	68.5714	4.7619
Dox	15	L-R_hindlimbs	0.333333	120	4.16667
Dox	15	L-R_hindlimbs	0.424242	152.727	3.0303
Dox	15	L-R_hindlimbs	0.3	108	5
Dox	15	L-R_hindlimbs	1	360	6.66667
Dox	15	L-R_hindlimbs	0.944444	340	5.55556
Dox	15	L-R_hindlimbs	0.863636	310.909	4.54545
Dox	16	L-R_hindlimbs	0.607143	218.571	3.57143
Dox	16	L-R_hindlimbs	0.571429	205.714	3.57143
Dox	16	L-R_hindlimbs	0.566667	204	3.33333
Dox	16	L-R_hindlimbs	0.5	180	3.84615
Dox	16	L-R_hindlimbs	0.538462	193.846	3.84615
Dox	16	L-R_hindlimbs	0.684211	246.316	5.26316
Dox	16	L-R_hindlimbs	0.851852	306.667	3.7037
Dox	17	L-R_hindlimbs	0.419355	150.968	3.22581
Dox	17	L-R_hindlimbs	0.5	180	3.33333
Dox	17	L-R_hindlimbs	0.52	187.2	4
Dox	17	L-R_hindlimbs	0.464286	167.143	3.57143
Dox	17	L-R_hindlimbs	0.52	187.2	4
Dox	17	L-R_hindlimbs	0.392857	141.429	3.57143
Dox	17	L-R_hindlimbs	0.518519	186.667	3.7037
Dox	17	L-R_hindlimbs	0.818182	294.545	4.54545
Dox	17	L-R_hindlimbs	0.809524	291.429	4.7619
Dox	18	L-R_hindlimbs	0.454545	163.636	4.54545
Dox	18	L-R_hindlimbs	0.5	180	3.84615
Dox	18	L-R_hindlimbs	0.538462	193.846	3.84615
Dox	18	L-R_hindlimbs	0.5	180	4.16667
Dox	18	L-R_hindlimbs	0.52	187.2	4
Dox	18	L-R_hindlimbs	0.56	201.6	4
Dox	18	L-R_hindlimbs	0.52381	188.571	4.7619
Dox	18	L-R_hindlimbs	0.5	180	4.54545
Dox	18	L-R_hindlimbs	0.947368	341.053	5.26316
Dox	18	L-R_hindlimbs	0.888889	320	5.55556
Dox	1	L-R_hindlimbs	0.941176	338.824	2.94118
Dox	1	L-R_hindlimbs	0.0294118	10.5882	2.94118
Dox	1	L-R_hindlimbs	0.0333333	12	3.33333
Dox	1	L-R_hindlimbs	0.419355	150.968	3.22581
Dox	1	L-R_hindlimbs	0.459459	165.405	2.7027
Dox	1	L-R_hindlimbs	0.588235	211.765	2.94118
Dox	1	L-R_hindlimbs	0.451613	162.581	3.22581
Dox	1	L-R_hindlimbs	0.534884	192.558	2.32558
Dox	1	L-R_hindlimbs	0.547619	197.143	2.38095
Dox	1	L-R_hindlimbs	0.44186	159.07	2.32558
Dox	2	L-R_hindlimbs	0.48	172.8	4
Dox	2	L-R_hindlimbs	0.46875	168.75	3.125
Dox	2	L-R_hindlimbs	0.481481	173.333	3.7037
Dox	2	L-R_hindlimbs	0.461538	166.154	3.84615
Dox	2	L-R_hindlimbs	0.407407	146.667	3.7037
Dox	2	L-R_hindlimbs	0.5	180	3.33333
Dox	2	L-R_hindlimbs	0.565217	203.478	4.34783
Dox	2	L-R_hindlimbs	0.576923	207.692	3.84615
Dox	2	L-R_hindlimbs	0.5	180	3.84615
Dox	7	L-R_hindlimbs	0.464286	167.143	3.57143
Dox	7	L-R_hindlimbs	0.448276	161.379	3.44828
Dox	7	L-R_hindlimbs	0.395349	142.326	2.32558
Dox	7	L-R_hindlimbs	0.513514	184.865	2.7027
Dox	7	L-R_hindlimbs	0.459459	165.405	2.7027
Dox	7	L-R_hindlimbs	0.515152	185.455	3.0303
Dox	7	L-R_hindlimbs	0.555556	200	2.77778
Dox	7	L-R_hindlimbs	0.527778	190	2.77778
Dox	8	L-R_hindlimbs	0.45	162	2.5
Dox	8	L-R_hindlimbs	0.457143	164.571	2.85714
Dox	8	L-R_hindlimbs	0.535714	192.857	3.57143
Dox	8	L-R_hindlimbs	0.5625	202.5	3.125
Dox	8	L-R_hindlimbs	0.564103	203.077	2.5641
Dox	8	L-R_hindlimbs	0.55814	200.93	2.32558
Dox	8	L-R_hindlimbs	0.527778	190	2.77778
Dox	8	L-R_hindlimbs	0.538462	193.846	2.5641
Dox	8	L-R_hindlimbs	0.542857	195.429	2.85714
Dox	8	L-R_hindlimbs	0.516129	185.806	3.22581
Dox	9	L-R_hindlimbs	0.52	187.2	4
Dox	9	L-R_hindlimbs	0.535714	192.857	3.57143
Dox	9	L-R_hindlimbs	0.2	72	6.66667
Dox	9	L-R_hindlimbs	0.157895	56.8421	5.26316
Dox	9	L-R_hindlimbs	0.208333	75	4.16667
Dox	9	L-R_hindlimbs	0.142857	51.4286	4.7619
Dox	9	L-R_hindlimbs	0.555556	200	3.7037
Dox	9	L-R_hindlimbs	0.62069	223.448	3.44828
Dox	9	L-R_hindlimbs	0	0	5.88235
Dox	9	L-R_hindlimbs	1	360	4.7619
Dox	10	L-R_hindlimbs	0.44	158.4	4
Dox	10	L-R_hindlimbs	0.35	126	5
Dox	10	L-R_hindlimbs	0.666667	240	4.7619
Dox	10	L-R_hindlimbs	0.625	225	4.16667
Dox	10	L-R_hindlimbs	0.625	225	4.16667
Dox	10	L-R_hindlimbs	0.9	324	5
Dox	10	L-R_hindlimbs	0.904762	325.714	4.7619
Dox	10	L-R_hindlimbs	0.947368	341.053	5.26316
Dox	10	L-R_hindlimbs	0.842105	303.158	5.26316
Dox	12	L-R_hindlimbs	0.8	288	5
Dox	12	L-R_hindlimbs	0.5	180	3.84615
Dox	12	L-R_hindlimbs	0.478261	172.174	4.34783
Dox	12	L-R_hindlimbs	0.291667	105	4.16667
Dox	12	L-R_hindlimbs	0.304348	109.565	4.34783
Dox	12	L-R_hindlimbs	0.472222	170	2.77778
Dox	12	L-R_hindlimbs	0.448276	161.379	3.44828
Dox	12	L-R_hindlimbs	0.477273	171.818	2.27273
Dox	12	L-R_hindlimbs	0.560976	201.951	2.43902
Dox	12	L-R_hindlimbs	0.615385	221.538	2.5641
Dox	13	L-R_hindlimbs	0.586207	211.034	3.44828
Dox	13	L-R_hindlimbs	0.535714	192.857	3.57143
Dox	13	L-R_hindlimbs	0.615385	221.538	2.5641
Dox	13	L-R_hindlimbs	0.607843	218.824	1.96078
Dox	13	L-R_hindlimbs	0.480769	173.077	1.92308
Dox	13	L-R_hindlimbs	0.517241	186.207	3.44828
Dox	13	L-R_hindlimbs	0.410256	147.692	2.5641
Dox	13	L-R_hindlimbs	0.516129	185.806	3.22581
Dox	14	L-R_hindlimbs	0.48	172.8	4
Dox	14	L-R_hindlimbs	0.518519	186.667	3.7037
Dox	14	L-R_hindlimbs	0.272727	98.1818	4.54545
Dox	14	L-R_hindlimbs	0.304348	109.565	4.34783
Dox	14	L-R_hindlimbs	0.344828	124.138	3.44828
Dox	14	L-R_hindlimbs	0.357143	128.571	3.57143
Dox	14	L-R_hindlimbs	0.448276	161.379	3.44828
Dox	14	L-R_hindlimbs	0.5	180	4.54545
Dox	14	L-R_hindlimbs	0.444444	160	3.7037
Dox	14	L-R_hindlimbs	0.384615	138.462	3.84615
Dox	15	L-R_hindlimbs	0.347826	125.217	4.34783
Dox	15	L-R_hindlimbs	0.307692	110.769	3.84615
Dox	15	L-R_hindlimbs	0.944444	340	4.54545
Dox	15	L-R_hindlimbs	0	0	4.7619
Dox	15	L-R_hindlimbs	1	360	5.26316
Dox	15	L-R_hindlimbs	0.52	187.2	4
Dox	15	L-R_hindlimbs	0.375	135	4.16667
Dox	15	L-R_hindlimbs	0.72	259.2	4
Dox	15	L-R_hindlimbs	0.681818	245.455	4.54545
Dox	15	L-R_hindlimbs	0	0	4
Dox	16	L-R_hindlimbs	0.5	180	4.54545
Dox	16	L-R_hindlimbs	0.56	201.6	4
Dox	16	L-R_hindlimbs	0.583333	210	4.16667
Dox	16	L-R_hindlimbs	0.72	259.2	4
Dox	16	L-R_hindlimbs	0.514286	185.143	2.85714
Dox	16	L-R_hindlimbs	0.485714	174.857	2.85714
Dox	16	L-R_hindlimbs	0.558824	201.176	2.94118
Dox	16	L-R_hindlimbs	0.586957	211.304	2.17391
Dox	16	L-R_hindlimbs	0.342857	123.429	2.85714
Dox	17	L-R_hindlimbs	0.416667	150	4.16667
Dox	17	L-R_hindlimbs	0.5	180	3.84615
Dox	17	L-R_hindlimbs	0.3	108	5
Dox	17	L-R_hindlimbs	0.371429	133.714	2.85714
Dox	17	L-R_hindlimbs	0.4375	157.5	3.125
Dox	17	L-R_hindlimbs	0.47619	171.429	4.7619
Dox	17	L-R_hindlimbs	0.392857	141.429	3.57143
Dox	17	L-R_hindlimbs	0.5	180	3.84615
Dox	18	L-R_hindlimbs	0.555556	200	3.7037
Dox	18	L-R_hindlimbs	0.541667	195	4.16667
Dox	18	L-R_hindlimbs	0.428571	154.286	4.7619
Dox	18	L-R_hindlimbs	0.380952	137.143	4.7619
Dox	18	L-R_hindlimbs	0.526316	189.474	5.26316
Dox	18	L-R_hindlimbs	0.5	180	5
Dox	18	L-R_hindlimbs	0.68	244.8	4
Dox	18	L-R_hindlimbs	0.636364	229.091	4.54545
Dox	18	L-R_hindlimbs	0.894737	322.105	5.26316
Dox	1	L-R_hindlimbs	0.484848	174.545	3.0303
Dox	1	L-R_hindlimbs	0.444444	160	3.7037
Dox	1	L-R_hindlimbs	0.5	180	2.77778
Dox	1	L-R_hindlimbs	0.45	162	2.5
Dox	1	L-R_hindlimbs	0.444444	160	2.22222
Dox	1	L-R_hindlimbs	0.454545	163.636	3.0303
Dox	1	L-R_hindlimbs	0.46875	168.75	3.125
Dox	1	L-R_hindlimbs	0.466667	168	3.33333
Dox	2	L-R_hindlimbs	0.482759	173.793	3.44828
Dox	2	L-R_hindlimbs	0.607143	218.571	3.57143
Dox	2	L-R_hindlimbs	0.52	187.2	4
Dox	2	L-R_hindlimbs	0.545455	196.364	3.0303
Dox	2	L-R_hindlimbs	0.588235	211.765	2.94118
Dox	2	L-R_hindlimbs	0.527778	190	2.77778
Dox	2	L-R_hindlimbs	0.59375	213.75	3.125
Dox	2	L-R_hindlimbs	0.382353	137.647	2.94118
Dox	7	L-R_hindlimbs	0.5	180	3.84615
Dox	7	L-R_hindlimbs	0.575758	207.273	3.0303
Dox	7	L-R_hindlimbs	0.62069	223.448	3.44828
Dox	7	L-R_hindlimbs	0.612903	220.645	3.22581
Dox	7	L-R_hindlimbs	0.395833	142.5	2.08333
Dox	7	L-R_hindlimbs	0.441176	158.824	2.94118
Dox	7	L-R_hindlimbs	0.5	180	3.57143
Dox	7	L-R_hindlimbs	0.64	230.4	4
Dox	7	L-R_hindlimbs	0.68	244.8	4
Dox	7	L-R_hindlimbs	0.772727	278.182	4.54545
Dox	8	L-R_hindlimbs	0.533333	192	3.33333
Dox	8	L-R_hindlimbs	0.451613	162.581	3.22581
Dox	8	L-R_hindlimbs	0.576923	207.692	3.84615
Dox	8	L-R_hindlimbs	0.517241	186.207	3.44828
Dox	8	L-R_hindlimbs	0.515152	185.455	3.0303
Dox	8	L-R_hindlimbs	0.607143	218.571	3.57143
Dox	8	L-R_hindlimbs	0.68	244.8	4
Dox	8	L-R_hindlimbs	0.64	230.4	4
Dox	8	L-R_hindlimbs	0.681818	245.455	4.54545
Dox	9	L-R_hindlimbs	0.52	187.2	4
Dox	9	L-R_hindlimbs	0.695652	250.435	4.34783
Dox	9	L-R_hindlimbs	0.85	306	5
Dox	9	L-R_hindlimbs	0.517241	186.207	3.44828
Dox	9	L-R_hindlimbs	0.761905	274.286	4.7619
Dox	9	L-R_hindlimbs	0.354839	127.742	3.22581
Dox	9	L-R_hindlimbs	0.478261	172.174	4.34783
Dox	9	L-R_hindlimbs	0.451613	162.581	3.22581
Dox	9	L-R_hindlimbs	0.95	342	5
Dox	9	L-R_hindlimbs	0.526316	189.474	2.63158
Dox	10	L-R_hindlimbs	0.272727	98.1818	4.54545
Dox	10	L-R_hindlimbs	0.15	54	5
Dox	10	L-R_hindlimbs	0.15	54	5
Dox	10	L-R_hindlimbs	0.0833333	30	4.16667
Dox	10	L-R_hindlimbs	0.276596	99.5745	2.12766
Dox	10	L-R_hindlimbs	0.888889	320	5.55556
Dox	10	L-R_hindlimbs	0	0	5
Dox	10	L-R_hindlimbs	1	360	5.55556
Dox	10	L-R_hindlimbs	0.791667	285	4.16667
Dox	10	L-R_hindlimbs	0.766667	276	3.33333
Dox	12	L-R_hindlimbs	0.413793	148.966	3.44828
Dox	12	L-R_hindlimbs	0.461538	166.154	3.84615
Dox	12	L-R_hindlimbs	0.5	180	3.84615
Dox	12	L-R_hindlimbs	0.478261	172.174	4.34783
Dox	12	L-R_hindlimbs	0.545455	196.364	4.54545
Dox	12	L-R_hindlimbs	0.6	216	4
Dox	12	L-R_hindlimbs	0.652174	234.783	4.34783
Dox	12	L-R_hindlimbs	0.238095	85.7143	4.7619
Dox	12	L-R_hindlimbs	0.458333	165	4.16667
Dox	13	L-R_hindlimbs	0.464286	167.143	3.57143
Dox	13	L-R_hindlimbs	0.5	180	3.57143
Dox	13	L-R_hindlimbs	0.472222	170	2.77778
Dox	13	L-R_hindlimbs	0.515152	185.455	3.0303
Dox	13	L-R_hindlimbs	0.464286	167.143	3.57143
Dox	13	L-R_hindlimbs	0.5	180	3.57143
Dox	13	L-R_hindlimbs	0.518519	186.667	3.7037
Dox	13	L-R_hindlimbs	0.533333	192	2.22222
Dox	13	L-R_hindlimbs	0.513514	184.865	2.7027
Dox	13	L-R_hindlimbs	0.5	180	3.57143
Dox	14	L-R_hindlimbs	0.428571	154.286	3.57143
Dox	14	L-R_hindlimbs	0.454545	163.636	3.0303
Dox	14	L-R_hindlimbs	0.464286	167.143	3.57143
Dox	14	L-R_hindlimbs	0.428571	154.286	3.57143
Dox	14	L-R_hindlimbs	0.448276	161.379	3.44828
Dox	14	L-R_hindlimbs	0.466667	168	3.33333
Dox	14	L-R_hindlimbs	0.37037	133.333	3.7037
Dox	14	L-R_hindlimbs	0.4	144	3.33333
Dox	14	L-R_hindlimbs	0.47619	171.429	2.38095
Dox	14	L-R_hindlimbs	0.416667	150	2.08333
Dox	15	L-R_hindlimbs	0.413793	148.966	3.44828
Dox	15	L-R_hindlimbs	0.515152	185.455	3.0303
Dox	15	L-R_hindlimbs	0.761905	274.286	4.7619
Dox	15	L-R_hindlimbs	0.5625	202.5	3.125
Dox	15	L-R_hindlimbs	0.761905	274.286	4.7619
Dox	15	L-R_hindlimbs	0.85	306	5
Dox	15	L-R_hindlimbs	0.470588	169.412	2.94118
Dox	15	L-R_hindlimbs	0.5	180	3.125
Dox	16	L-R_hindlimbs	0.551724	198.621	3.44828
Dox	16	L-R_hindlimbs	0.485714	174.857	2.85714
Dox	16	L-R_hindlimbs	0.5	180	3.57143
Dox	16	L-R_hindlimbs	0.481481	173.333	3.7037
Dox	16	L-R_hindlimbs	0.59375	213.75	3.125
Dox	16	L-R_hindlimbs	0.5625	202.5	3.125
Dox	16	L-R_hindlimbs	0.590909	212.727	4.54545
Dox	16	L-R_hindlimbs	0.7	252	3.33333
Dox	16	L-R_hindlimbs	0.714286	257.143	3.57143
Dox	17	L-R_hindlimbs	0.441176	158.824	2.94118
Dox	17	L-R_hindlimbs	0.545455	196.364	3.0303
Dox	17	L-R_hindlimbs	0.657143	236.571	2.85714
Dox	17	L-R_hindlimbs	0.548387	197.419	3.22581
Dox	17	L-R_hindlimbs	0.482759	173.793	3.44828
Dox	17	L-R_hindlimbs	0.448276	161.379	3.44828
Dox	17	L-R_hindlimbs	0.517241	186.207	3.44828
Dox	17	L-R_hindlimbs	0.405405	145.946	2.7027
Dox	17	L-R_hindlimbs	0.413793	148.966	3.44828
Dox	18	L-R_hindlimbs	0.461538	166.154	3.84615
Dox	18	L-R_hindlimbs	0.517241	186.207	3.44828
Dox	18	L-R_hindlimbs	0.714286	257.143	4.7619
Dox	18	L-R_hindlimbs	0.695652	250.435	4.34783
Dox	18	L-R_hindlimbs	0.451613	162.581	3.22581
Dox	18	L-R_hindlimbs	0.4375	157.5	3.125
Dox	18	L-R_hindlimbs	0.75	270	5
Dox	18	L-R_hindlimbs	0.458333	165	4.16667
Dox	18	L-R_hindlimbs	0.68	244.8	4
Dox	18	L-R_hindlimbs	0.708333	255	4.16667
Dox	1	L-R_hindlimbs	0.522727	188.182	2.27273
Dox	1	L-R_hindlimbs	0.459459	165.405	2.7027
Dox	1	L-R_hindlimbs	0.5	180	3.57143
Dox	1	L-R_hindlimbs	0.475	171	2.5
Dox	1	L-R_hindlimbs	0.516129	185.806	3.22581
Dox	1	L-R_hindlimbs	0.431818	155.455	2.27273
Dox	1	L-R_hindlimbs	0.555556	200	3.7037
Dox	1	L-R_hindlimbs	0.517241	186.207	3.44828
Dox	2	L-R_hindlimbs	0.5	180	3.33333
Dox	2	L-R_hindlimbs	0.574468	206.809	2.12766
Dox	2	L-R_hindlimbs	0.533333	192	3.33333
Dox	2	L-R_hindlimbs	0.486486	175.135	2.7027
Dox	2	L-R_hindlimbs	0.516129	185.806	3.22581
Dox	2	L-R_hindlimbs	0.571429	205.714	3.57143
Dox	2	L-R_hindlimbs	0.478261	172.174	4.34783
Dox	2	L-R_hindlimbs	0.481481	173.333	3.7037
Dox	7	L-R_hindlimbs	0.40625	146.25	3.125
Dox	7	L-R_hindlimbs	0.5	180	2.63158
Dox	7	L-R_hindlimbs	0.586207	211.034	3.44828
Dox	7	L-R_hindlimbs	0.566667	204	3.33333
Dox	7	L-R_hindlimbs	0.535714	192.857	3.57143
Dox	7	L-R_hindlimbs	0.576923	207.692	3.84615
Dox	7	L-R_hindlimbs	0.451613	162.581	3.22581
Dox	7	L-R_hindlimbs	0.576923	207.692	3.84615
Dox	7	L-R_hindlimbs	0.590909	212.727	4.54545
Dox	7	L-R_hindlimbs	0.586207	211.034	3.44828
Dox	8	L-R_hindlimbs	0.642857	231.429	3.57143
Dox	8	L-R_hindlimbs	0.653846	235.385	3.84615
Dox	8	L-R_hindlimbs	0.6	216	4
Dox	8	L-R_hindlimbs	0.514286	185.143	2.85714
Dox	8	L-R_hindlimbs	0.538462	193.846	3.84615
Dox	8	L-R_hindlimbs	0.64	230.4	4
Dox	8	L-R_hindlimbs	0.615385	221.538	3.84615
Dox	9	L-R_hindlimbs	0.5	180	4.16667
Dox	9	L-R_hindlimbs	0.625	225	4.16667
Dox	9	L-R_hindlimbs	1	360	5.26316
Dox	9	L-R_hindlimbs	1	360	6.25
Dox	9	L-R_hindlimbs	0.37037	133.333	3.7037
Dox	9	L-R_hindlimbs	0.941176	338.824	5.88235
Dox	9	L-R_hindlimbs	0.857143	308.571	4.7619
Dox	9	L-R_hindlimbs	0.5	180	2.63158
Dox	9	L-R_hindlimbs	0.606061	218.182	3.0303
Dox	9	L-R_hindlimbs	0.210526	75.7895	3.0303
Dox	10	L-R_hindlimbs	0.428571	154.286	5.26316
Dox	10	L-R_hindlimbs	0.52381	188.571	3.57143
Dox	10	L-R_hindlimbs	0.772727	278.182	2.38095
Dox	10	L-R_hindlimbs	0.789474	284.211	4.54545
Dox	10	L-R_hindlimbs	0.888889	320	5.26316
Dox	10	L-R_hindlimbs	0.0526316	18.9474	5.55556
Dox	10	L-R_hindlimbs	0.142857	51.4286	5.55556
Dox	10	L-R_hindlimbs	0.857143	308.571	5.26316
Dox	10	L-R_hindlimbs	1	360	4.7619
Dox	10	L-R_hindlimbs	0.944444	340	4.7619
Dox	12	L-R_hindlimbs	0.375	135	5.26316
Dox	12	L-R_hindlimbs	0.714286	257.143	5
Dox	12	L-R_hindlimbs	0.269231	96.9231	3.44828
Dox	12	L-R_hindlimbs	0.166667	60	3.84615
Dox	12	L-R_hindlimbs	0.952381	342.857	3.84615
Dox	12	L-R_hindlimbs	0.619048	222.857	4.34783
Dox	12	L-R_hindlimbs	0.15	54	4.54545
Dox	12	L-R_hindlimbs	0.304348	109.565	4.34783
Dox	12	L-R_hindlimbs	0.208333	75	4.7619
Dox	12	L-R_hindlimbs	0.15	54	4.16667
Dox	12	L-R_hindlimbs	0.714286	257.143	2.77778
Dox	13	L-R_hindlimbs	0.535714	192.857	3.0303
Dox	13	L-R_hindlimbs	0.483871	174.194	3.57143
Dox	13	L-R_hindlimbs	0.541667	195	4
Dox	13	L-R_hindlimbs	0.538462	193.846	4.34783
Dox	13	L-R_hindlimbs	0.727273	261.818	3.57143
Dox	13	L-R_hindlimbs	0.761905	274.286	3.7037
Dox	13	L-R_hindlimbs	0.952381	342.857	2.22222
Dox	13	L-R_hindlimbs	0.772727	278.182	2.7027
Dox	13	L-R_hindlimbs	0.75	270	3.57143
Dox	13	L-R_hindlimbs	0.76	273.6	3.0303
Dox	14	L-R_hindlimbs	0.423077	152.308	3.57143
Dox	14	L-R_hindlimbs	0.347826	125.217	3.57143
Dox	14	L-R_hindlimbs	0.347826	125.217	3.44828
Dox	14	L-R_hindlimbs	0.347826	125.217	3.33333
Dox	14	L-R_hindlimbs	0.142857	51.4286	3.7037
Dox	14	L-R_hindlimbs	0.238095	85.7143	3.33333
Dox	14	L-R_hindlimbs	0.454545	163.636	2.38095
Dox	14	L-R_hindlimbs	0.416667	150	2.08333
Dox	14	L-R_hindlimbs	0.85	306	3.44828
Dox	15	L-R_hindlimbs	0.347826	125.217	2.5
Dox	15	L-R_hindlimbs	0.464286	167.143	3.0303
Dox	15	L-R_hindlimbs	0.75	270	4.7619
Dox	15	L-R_hindlimbs	1	360	3.125
Dox	15	L-R_hindlimbs	0.947368	341.053	4.7619
Dox	15	L-R_hindlimbs	0.941176	338.824	5
Dox	15	L-R_hindlimbs	0.95	342	2.94118
Dox	15	L-R_hindlimbs	1	360	3.125
Dox	15	L-R_hindlimbs	1	360	3.44828
Dox	15	L-R_hindlimbs	0.482759	173.793	2.85714
Dox	16	L-R_hindlimbs	0.64	230.4	3.57143
Dox	16	L-R_hindlimbs	0.666667	240	3.7037
Dox	16	L-R_hindlimbs	0.571429	205.714	3.125
Dox	16	L-R_hindlimbs	0.6	216	3.125
Dox	16	L-R_hindlimbs	0.541667	195	4.54545
Dox	16	L-R_hindlimbs	0.608696	219.13	3.33333
Dox	16	L-R_hindlimbs	0.428571	154.286	3.57143
Dox	16	L-R_hindlimbs	0.484848	174.545	2.94118
Dox	16	L-R_hindlimbs	0.48	172.8	2.85714
Dox	17	L-R_hindlimbs	0.482759	173.793	3.22581
Dox	17	L-R_hindlimbs	0.166667	60	3.44828
Dox	17	L-R_hindlimbs	0.533333	192	3.44828
Dox	17	L-R_hindlimbs	0.413793	148.966	3.44828
Dox	17	L-R_hindlimbs	0.375	135	3.44828
Dox	17	L-R_hindlimbs	0.551724	198.621	2.7027
Dox	17	L-R_hindlimbs	0.555556	200	3.44828
Dox	17	L-R_hindlimbs	0.428571	154.286	3.84615
Dox	17	L-R_hindlimbs	0.538462	193.846	3.44828
Dox	17	L-R_hindlimbs	0.52381	188.571	4.7619
Dox	18	L-R_hindlimbs	0.413793	148.966	4.34783
Dox	18	L-R_hindlimbs	0.482759	173.793	3.22581
Dox	18	L-R_hindlimbs	0.75	270	3.125
Dox	18	L-R_hindlimbs	0.904762	325.714	5
Dox	18	L-R_hindlimbs	0.210526	75.7895	4.16667
Dox	18	L-R_hindlimbs	1	360	4.16667
Dox	18	L-R_hindlimbs	1	360	4
Dox	18	L-R_hindlimbs	0.5	180	4.16667
