# Supplementary material for: Long ascending propriospinal neurons provide flexible, context-specific control of interlimb coordination
Source: eLife. 2020 Sep 9;9:e53565. doi: 10.7554/eLife.53565 (PMC7527236; doi:10.7554/eLife.53565)
Supplement: Figure 4—source data 3. [file elife-53565-fig4-data3.xlsx]

## Sheet: Forelimb
Time_ID	Animal_ID	Limb_ID	transPhase	ref_r-FL_stanceTime(s)	ref_r-FL_swingTime(s)	ref_r-FL_strideTime(s)	ref_r-FL_strideFreq(Hz)	ref_r-FL_strideDist(cm)	ref_r-FL_instSpd(cm/s)
Con	1	L-R_forelimb	0.529412	0.18	0.16	0.34	2.94118	16.6884	49.0834
Con	1	L-R_forelimb	0.514286	0.2	0.15	0.35	2.85714	15.3638	43.8966
Con	1	L-R_forelimb	0.529412	0.19	0.15	0.34	2.94118	14.3722	42.2713
Con	1	L-R_forelimb	0.5	0.19	0.15	0.34	2.94118	12.4139	36.5114
Con	1	L-R_forelimb	0.575	0.21	0.19	0.4	2.5	17.0057	42.5143
Con	1	L-R_forelimb	0.516129	0.15	0.16	0.31	3.22581	16.8033	54.2042
Con	1	L-R_forelimb	0.571429	0.14	0.14	0.28	3.57143	17.2602	61.6437
Con	1	L-R_forelimb	0.518519	0.13	0.14	0.27	3.7037	16.2735	60.272
Con	1	L-R_forelimb	0.571429	0.18	0.17	0.35	2.85714	15.8509	45.2884
Con	1	L-R_forelimb	0.517241	0.14	0.15	0.29	3.44828	17.9956	62.0537
Con	2	L-R_forelimb	0.515152	0.17	0.16	0.33	3.0303	15.4146	46.7111
Con	2	L-R_forelimb	0.529412	0.18	0.16	0.34	2.94118	15.7749	46.3968
Con	2	L-R_forelimb	0.515152	0.19	0.14	0.33	3.0303	15.8423	48.007
Con	2	L-R_forelimb	0.517241	0.14	0.15	0.29	3.44828	18.6446	64.2919
Con	2	L-R_forelimb	0.533333	0.14	0.16	0.3	3.33333	19.3454	64.4846
Con	2	L-R_forelimb	0.538462	0.12	0.14	0.26	3.84615	14.9343	57.4395
Con	2	L-R_forelimb	0.56	0.12	0.13	0.25	4	17.2119	68.8476
Con	2	L-R_forelimb	0.5	0.11	0.11	0.22	4.54545	12.8801	58.5457
Con	2	L-R_forelimb	0.5625	0.17	0.15	0.32	3.125	15.6135	48.7923
Con	7	L-R_forelimb	0.514286	0.18	0.17	0.35	2.85714	17.9913	51.4037
Con	7	L-R_forelimb	0.517241	0.15	0.14	0.29	3.44828	15.2189	52.479
Con	7	L-R_forelimb	0.576923	0.12	0.14	0.26	3.84615	15.2604	58.6939
Con	7	L-R_forelimb	0.545455	0.09	0.13	0.22	4.54545	20.5903	93.5921
Con	7	L-R_forelimb	0.545455	0.11	0.11	0.22	4.54545	17.8052	80.9328
Con	7	L-R_forelimb	0.541667	0.09	0.15	0.24	4.16667	20.5837	85.7653
Con	7	L-R_forelimb	0.6	0.1	0.1	0.2	5	17.3728	86.8642
Con	8	L-R_forelimb	0.533333	0.18	0.12	0.3	3.33333	14.388	47.96
Con	8	L-R_forelimb	0.566667	0.15	0.15	0.3	3.33333	15.0962	50.3206
Con	8	L-R_forelimb	0.555556	0.12	0.15	0.27	3.7037	17.2324	63.8235
Con	8	L-R_forelimb	0.6	0.17	0.18	0.35	2.85714	17.4591	49.8832
Con	8	L-R_forelimb	0.545455	0.12	0.1	0.22	4.54545	12.1654	55.2974
Con	9	L-R_forelimb	0.588235	0.21	0.13	0.34	2.94118	13.7581	40.4651
Con	9	L-R_forelimb	0.571429	0.13	0.15	0.28	3.57143	14.7977	52.849
Con	9	L-R_forelimb	0.586207	0.14	0.15	0.29	3.44828	15.1159	52.124
Con	9	L-R_forelimb	0.576923	0.16	0.1	0.26	3.84615	11.861	45.6194
Con	9	L-R_forelimb	0.527778	0.26	0.1	0.36	2.77778	11.219	31.1639
Con	9	L-R_forelimb	0.551724	0.18	0.11	0.29	3.44828	11.0678	38.1647
Con	9	L-R_forelimb	0.545455	0.11	0.11	0.22	4.54545	15.9604	72.5471
Con	9	L-R_forelimb	0.5	0.14	0.12	0.26	3.84615	14.8352	57.0583
Con	10	L-R_forelimb	0.535714	0.16	0.12	0.28	3.57143	17.0669	60.9532
Con	10	L-R_forelimb	0.517241	0.15	0.14	0.29	3.44828	15.3091	52.7901
Con	10	L-R_forelimb	0.518519	0.12	0.15	0.27	3.7037	19.4681	72.1041
Con	10	L-R_forelimb	0.535714	0.13	0.15	0.28	3.57143	18.4369	65.8461
Con	10	L-R_forelimb	0.52381	0.1	0.11	0.21	4.7619	16.405	78.1189
Con	10	L-R_forelimb	0.52	0.12	0.13	0.25	4	19.0335	76.134
Con	10	L-R_forelimb	0.5	0.11	0.13	0.24	4.16667	20.7675	86.5314
Con	12	L-R_forelimb	0.516129	0.17	0.14	0.31	3.22581	15.57	50.2257
Con	12	L-R_forelimb	0.542857	0.2	0.15	0.35	2.85714	16.3695	46.77
Con	12	L-R_forelimb	0.533333	0.17	0.13	0.3	3.33333	16.2147	54.049
Con	12	L-R_forelimb	0.5	0.16	0.16	0.32	3.125	17.4493	54.5292
Con	12	L-R_forelimb	0.53125	0.16	0.16	0.32	3.125	16.1556	50.4861
Con	12	L-R_forelimb	0.5	0.1	0.14	0.24	4.16667	19.3303	80.5427
Con	12	L-R_forelimb	0.545455	0.1	0.12	0.22	4.54545	15.9406	72.4573
Con	12	L-R_forelimb	0.518519	0.14	0.13	0.27	3.7037	11.1607	41.3361
Con	12	L-R_forelimb	0.594595	0.2	0.17	0.37	2.7027	17.1757	46.4207
Con	12	L-R_forelimb	0.5	0.13	0.13	0.26	3.84615	16.8916	64.9677
Con	12	L-R_forelimb	0.5	0.17	0.13	0.3	3.33333	14.2564	47.5213
Con	12	L-R_forelimb	0.5	0.13	0.11	0.24	4.16667	13.018	54.2418
Con	13	L-R_forelimb	0.529412	0.17	0.17	0.34	2.94118	19.1909	56.4437
Con	13	L-R_forelimb	0.516129	0.16	0.15	0.31	3.22581	17.7076	57.1214
Con	13	L-R_forelimb	0.5	0.13	0.15	0.28	3.57143	18.6045	66.4447
Con	13	L-R_forelimb	0.518519	0.14	0.13	0.27	3.7037	17.0091	62.9965
Con	13	L-R_forelimb	0.565217	0.09	0.14	0.23	4.34783	20.0293	87.0838
Con	13	L-R_forelimb	0.541667	0.1	0.14	0.24	4.16667	19.7993	82.4971
Con	13	L-R_forelimb	0.521739	0.09	0.14	0.23	4.34783	22.1874	96.4668
Con	13	L-R_forelimb	0.52381	0.09	0.12	0.21	4.7619	19.4043	92.4014
Con	13	L-R_forelimb	0.538462	0.12	0.14	0.26	3.84615	18.7161	71.985
Con	13	L-R_forelimb	0.555556	0.12	0.15	0.27	3.7037	17.6363	65.3196
Con	13	L-R_forelimb	0.555556	0.11	0.16	0.27	3.7037	19.4591	72.0708
Con	13	L-R_forelimb	0.52	0.11	0.14	0.25	4	19.3493	77.3971
Con	14	L-R_forelimb	0.52381	0.23	0.19	0.42	2.38095	13.8543	32.9865
Con	14	L-R_forelimb	0.52381	0.27	0.15	0.42	2.38095	15.2276	36.2562
Con	14	L-R_forelimb	0.548387	0.15	0.16	0.31	3.22581	17.5686	56.673
Con	14	L-R_forelimb	0.571429	0.13	0.15	0.28	3.57143	17.3652	62.0185
Con	14	L-R_forelimb	0.545455	0.09	0.13	0.22	4.54545	21.1244	96.0199
Con	14	L-R_forelimb	0.5	0.08	0.14	0.22	4.54545	21.869	99.4046
Con	14	L-R_forelimb	0.533333	0.14	0.16	0.3	3.33333	15.9115	53.0385
Con	14	L-R_forelimb	0.52381	0.08	0.13	0.21	4.7619	19.7525	94.0595
Con	14	L-R_forelimb	0.52	0.1	0.15	0.25	4	21.0096	84.0382
Con	14	L-R_forelimb	0.52381	0.08	0.13	0.21	4.7619	18.5978	88.5609
Con	15	L-R_forelimb	0.515152	0.16	0.17	0.33	3.0303	17.8546	54.1049
Con	15	L-R_forelimb	0.515152	0.16	0.17	0.33	3.0303	18.7671	56.87
Con	15	L-R_forelimb	0.535714	0.13	0.15	0.28	3.57143	19.9727	71.3311
Con	15	L-R_forelimb	0.518519	0.11	0.16	0.27	3.7037	17.5159	64.8735
Con	15	L-R_forelimb	0.5625	0.14	0.18	0.32	3.125	17.4196	54.4364
Con	15	L-R_forelimb	0.5	0.12	0.14	0.26	3.84615	19.8506	76.3485
Con	15	L-R_forelimb	0.521739	0.08	0.15	0.23	4.34783	20.2825	88.185
Con	15	L-R_forelimb	0.533333	0.16	0.14	0.3	3.33333	12.1724	40.5747
Con	15	L-R_forelimb	0.512821	0.19	0.2	0.39	2.5641	13.5164	34.6573
Con	16	L-R_forelimb	0.5	0.12	0.12	0.24	4.16667	18.5779	77.4081
Con	16	L-R_forelimb	0.518519	0.13	0.14	0.27	3.7037	18.4701	68.4079
Con	16	L-R_forelimb	0.538462	0.12	0.14	0.26	3.84615	18.1638	69.8606
Con	16	L-R_forelimb	0.590909	0.08	0.14	0.22	4.54545	19.6972	89.5329
Con	16	L-R_forelimb	0.545455	0.09	0.13	0.22	4.54545	19.5827	89.0122
Con	16	L-R_forelimb	0.576923	0.12	0.14	0.26	3.84615	16.4594	63.3053
Con	16	L-R_forelimb	0.5625	0.13	0.19	0.32	3.125	16.1603	50.5011
Con	16	L-R_forelimb	0.545455	0.16	0.17	0.33	3.0303	12.8549	38.9542
Con	16	L-R_forelimb	0.536585	0.19	0.22	0.41	2.43902	10.7568	26.2362
Con	16	L-R_forelimb	0.564103	0.19	0.2	0.39	2.5641	18.6043	47.7034
Con	16	L-R_forelimb	0.571429	0.09	0.12	0.21	4.7619	17.5808	83.7183
Con	17	L-R_forelimb	0.512195	0.23	0.18	0.41	2.43902	16.0702	39.1955
Con	17	L-R_forelimb	0.5	0.21	0.17	0.38	2.63158	17.6588	46.4706
Con	17	L-R_forelimb	0.515152	0.16	0.17	0.33	3.0303	17.4247	52.8022
Con	17	L-R_forelimb	0.5	0.13	0.15	0.28	3.57143	20.1883	72.1011
Con	17	L-R_forelimb	0.535714	0.12	0.16	0.28	3.57143	19.3409	69.0745
Con	17	L-R_forelimb	0.5	0.13	0.15	0.28	3.57143	17.932	64.0429
Con	17	L-R_forelimb	0.52	0.11	0.14	0.25	4	18.4499	73.7995
Con	17	L-R_forelimb	0.514286	0.16	0.19	0.35	2.85714	17.1477	48.9935
Con	17	L-R_forelimb	0.53125	0.15	0.17	0.32	3.125	15.9619	49.8808
Con	18	L-R_forelimb	0.5	0.14	0.14	0.28	3.57143	16.3329	58.3319
Con	18	L-R_forelimb	0.551724	0.14	0.15	0.29	3.44828	18.7726	64.7331
Con	18	L-R_forelimb	0.518519	0.11	0.16	0.27	3.7037	17.9769	66.581
Con	18	L-R_forelimb	0.56	0.09	0.16	0.25	4	19.228	76.9122
Con	18	L-R_forelimb	0.538462	0.11	0.15	0.26	3.84615	14.6785	56.4559
Con	18	L-R_forelimb	0.538462	0.11	0.15	0.26	3.84615	17.4479	67.1072
Con	18	L-R_forelimb	0.615385	0.1	0.16	0.26	3.84615	16.557	63.6806
Con	18	L-R_forelimb	0.541667	0.09	0.15	0.24	4.16667	17.9317	74.7153
Con	18	L-R_forelimb	0.517241	0.1	0.19	0.29	3.44828	17.7345	61.1534
Con	18	L-R_forelimb	0.541667	0.1	0.14	0.24	4.16667	15.8225	65.9269
Con	18	L-R_forelimb	0.518519	0.1	0.17	0.27	3.7037	15.6442	57.9416
Con	1	L-R_forelimb	0.515152	0.17	0.16	0.33	3.0303	18.0818	54.7932
Con	1	L-R_forelimb	0.545455	0.16	0.17	0.33	3.0303	17.0361	51.6247
Con	1	L-R_forelimb	0.605263	0.2	0.18	0.38	2.63158	10.3538	27.2467
Con	1	L-R_forelimb	0.535714	0.11	0.17	0.28	3.57143	20.8753	74.5547
Con	1	L-R_forelimb	0.516129	0.14	0.17	0.31	3.22581	19.6019	63.2318
Con	1	L-R_forelimb	0.5	0.1	0.18	0.28	3.57143	19.8388	70.853
Con	2	L-R_forelimb	0.529412	0.19	0.15	0.34	2.94118	16.9965	49.9896
Con	2	L-R_forelimb	0.515152	0.17	0.16	0.33	3.0303	15.9714	48.398
Con	2	L-R_forelimb	0.55	0.2	0.2	0.4	2.5	16.3173	40.7934
Con	2	L-R_forelimb	0.513514	0.19	0.18	0.37	2.7027	18.6396	50.3772
Con	2	L-R_forelimb	0.517241	0.15	0.14	0.29	3.44828	15.9349	54.9478
Con	2	L-R_forelimb	0.535714	0.13	0.15	0.28	3.57143	17.7364	63.3441
Con	7	L-R_forelimb	0.542857	0.17	0.18	0.35	2.85714	17.2551	49.3004
Con	7	L-R_forelimb	0.517241	0.16	0.13	0.29	3.44828	15.0075	51.75
Con	7	L-R_forelimb	0.560976	0.19	0.22	0.41	2.43902	14.7805	36.05
Con	7	L-R_forelimb	0.64	0.1	0.15	0.25	4	20.0312	80.1249
Con	7	L-R_forelimb	0.56	0.11	0.14	0.25	4	17.7696	71.0784
Con	7	L-R_forelimb	0.518519	0.12	0.15	0.27	3.7037	18.6541	69.0892
Con	7	L-R_forelimb	0.517241	0.14	0.15	0.29	3.44828	18.2117	62.7991
Con	7	L-R_forelimb	0.555556	0.12	0.15	0.27	3.7037	19.0571	70.582
Con	7	L-R_forelimb	0.535714	0.13	0.15	0.28	3.57143	17.8111	63.6111
Con	7	L-R_forelimb	0.612903	0.13	0.18	0.31	3.22581	18.3569	59.2158
Con	7	L-R_forelimb	0.5	0.12	0.14	0.26	3.84615	15.1857	58.4064
Con	8	L-R_forelimb	0.594595	0.22	0.15	0.37	2.7027	14.6899	39.7024
Con	8	L-R_forelimb	0.606061	0.16	0.17	0.33	3.0303	13.4869	40.8694
Con	8	L-R_forelimb	0.5	0.16	0.18	0.34	2.94118	16.17	47.5588
Con	8	L-R_forelimb	0.555556	0.15	0.12	0.27	3.7037	13.2207	48.9654
Con	8	L-R_forelimb	0.5	0.15	0.15	0.3	3.33333	14.5676	48.5586
Con	9	L-R_forelimb	0.518519	0.12	0.15	0.27	3.7037	17.9866	66.6172
Con	9	L-R_forelimb	0.535714	0.14	0.14	0.28	3.57143	16.4747	58.8382
Con	9	L-R_forelimb	0.535714	0.13	0.15	0.28	3.57143	15.9126	56.8308
Con	9	L-R_forelimb	0.516129	0.16	0.15	0.31	3.22581	15.6234	50.3982
Con	9	L-R_forelimb	0.517241	0.14	0.15	0.29	3.44828	17.2493	59.4805
Con	9	L-R_forelimb	0.518519	0.14	0.13	0.27	3.7037	15.4524	57.231
Con	9	L-R_forelimb	0.53125	0.14	0.18	0.32	3.125	13.6581	42.6817
Con	10	L-R_forelimb	0.5	0.13	0.15	0.28	3.57143	19.3041	68.943
Con	10	L-R_forelimb	0.52	0.11	0.14	0.25	4	19.1385	76.5538
Con	10	L-R_forelimb	0.590909	0.09	0.13	0.22	4.54545	19.002	86.3725
Con	10	L-R_forelimb	0.545455	0.1	0.12	0.22	4.54545	18.1119	82.3268
Con	10	L-R_forelimb	0.517241	0.14	0.15	0.29	3.44828	17.4452	60.1558
Con	10	L-R_forelimb	0.5	0.13	0.13	0.26	3.84615	16.3883	63.032
Con	10	L-R_forelimb	0.551724	0.15	0.14	0.29	3.44828	19.1172	65.9215
Con	10	L-R_forelimb	0.517241	0.13	0.16	0.29	3.44828	21.0553	72.6044
Con	10	L-R_forelimb	0.583333	0.11	0.13	0.24	4.16667	18.2811	76.1711
Con	10	L-R_forelimb	0.576923	0.12	0.14	0.26	3.84615	19.6135	75.4366
Con	10	L-R_forelimb	0.571429	0.09	0.12	0.21	4.7619	18.5088	88.1371
Con	12	L-R_forelimb	0.535714	0.13	0.15	0.28	3.57143	19.7082	70.3865
Con	12	L-R_forelimb	0.535714	0.14	0.14	0.28	3.57143	15.9581	56.9931
Con	12	L-R_forelimb	0.56	0.11	0.14	0.25	4	21.6098	86.4391
Con	12	L-R_forelimb	0.521739	0.08	0.15	0.23	4.34783	20.409	88.7346
Con	12	L-R_forelimb	0.590909	0.1	0.12	0.22	4.54545	18.3431	83.3775
Con	12	L-R_forelimb	0.541667	0.1	0.14	0.24	4.16667	18.8015	78.3394
Con	12	L-R_forelimb	0.580645	0.16	0.15	0.31	3.22581	16.7389	53.9964
Con	12	L-R_forelimb	0.517241	0.15	0.14	0.29	3.44828	14.8144	51.084
Con	12	L-R_forelimb	0.5	0.17	0.17	0.34	2.94118	14.8186	43.5842
Con	12	L-R_forelimb	0.564103	0.2	0.19	0.39	2.5641	12.8742	33.0107
Con	12	L-R_forelimb	0.625	0.16	0.16	0.32	3.125	20.5246	64.1392
Con	12	L-R_forelimb	0.545455	0.08	0.14	0.22	4.54545	20.356	92.5273
Con	13	L-R_forelimb	0.527778	0.17	0.19	0.36	2.77778	20.5815	57.1707
Con	13	L-R_forelimb	0.5	0.17	0.19	0.36	2.77778	18.1417	50.3937
Con	13	L-R_forelimb	0.533333	0.15	0.15	0.3	3.33333	20.8346	69.4485
Con	13	L-R_forelimb	0.617647	0.16	0.18	0.34	2.94118	20.2698	59.6171
Con	13	L-R_forelimb	0.565217	0.09	0.14	0.23	4.34783	22.1939	96.4954
Con	13	L-R_forelimb	0.636364	0.1	0.12	0.22	4.54545	18.216	82.8001
Con	13	L-R_forelimb	0.551724	0.13	0.16	0.29	3.44828	19.1551	66.0522
Con	13	L-R_forelimb	0.5	0.16	0.1	0.26	3.84615	11.7709	45.2729
Con	13	L-R_forelimb	0.588235	0.16	0.18	0.34	2.94118	16.7757	49.3404
Con	14	L-R_forelimb	0.53125	0.17	0.15	0.32	3.125	19.696	61.5499
Con	14	L-R_forelimb	0.5	0.14	0.14	0.28	3.57143	16.9029	60.3674
Con	14	L-R_forelimb	0.535714	0.14	0.14	0.28	3.57143	19.688	70.3143
Con	14	L-R_forelimb	0.5	0.15	0.15	0.3	3.33333	19.5673	65.2244
Con	14	L-R_forelimb	0.62069	0.15	0.14	0.29	3.44828	21.069	72.6516
Con	14	L-R_forelimb	0.555556	0.12	0.15	0.27	3.7037	21.1737	78.4211
Con	14	L-R_forelimb	0.541667	0.11	0.13	0.24	4.16667	19.576	81.5669
Con	14	L-R_forelimb	0.5	0.1	0.16	0.26	3.84615	21.6377	83.2221
Con	15	L-R_forelimb	0.583333	0.17	0.19	0.36	2.77778	17.1025	47.5068
Con	15	L-R_forelimb	0.542857	0.18	0.17	0.35	2.85714	18.4344	52.6698
Con	15	L-R_forelimb	0.515152	0.15	0.18	0.33	3.0303	17.5597	53.2111
Con	15	L-R_forelimb	0.517241	0.14	0.15	0.29	3.44828	13.9741	48.1864
Con	15	L-R_forelimb	0.5	0.19	0.13	0.32	3.125	14.6456	45.7676
Con	15	L-R_forelimb	0.521739	0.08	0.15	0.23	4.34783	21.5897	93.8683
Con	15	L-R_forelimb	0.521739	0.09	0.14	0.23	4.34783	16.1042	70.0181
Con	15	L-R_forelimb	0.638889	0.2	0.16	0.36	2.77778	18.2149	50.597
Con	15	L-R_forelimb	0.5	0.11	0.13	0.24	4.16667	15.4613	64.4221
Con	16	L-R_forelimb	0.551724	0.13	0.16	0.29	3.44828	19.2069	66.2308
Con	16	L-R_forelimb	0.518519	0.13	0.14	0.27	3.7037	16.0839	59.5699
Con	16	L-R_forelimb	0.518519	0.12	0.15	0.27	3.7037	21.2662	78.7636
Con	16	L-R_forelimb	0.521739	0.1	0.13	0.23	4.34783	18.4234	80.1019
Con	16	L-R_forelimb	0.545455	0.09	0.13	0.22	4.54545	18.2953	83.1606
Con	16	L-R_forelimb	0.541667	0.11	0.13	0.24	4.16667	16.0012	66.6715
Con	16	L-R_forelimb	0.515152	0.16	0.17	0.33	3.0303	18.1826	55.0988
Con	16	L-R_forelimb	0.541667	0.1	0.14	0.24	4.16667	19.6804	82.0015
Con	16	L-R_forelimb	0.5625	0.14	0.18	0.32	3.125	15.8799	49.6246
Con	16	L-R_forelimb	0.555556	0.18	0.18	0.36	2.77778	15.4545	42.929
Con	16	L-R_forelimb	0.605263	0.19	0.19	0.38	2.63158	14.1544	37.2485
Con	16	L-R_forelimb	0.627907	0.18	0.25	0.43	2.32558	17.0521	39.6559
Con	17	L-R_forelimb	0.515152	0.17	0.16	0.33	3.0303	15.6229	47.342
Con	17	L-R_forelimb	0.529412	0.17	0.17	0.34	2.94118	18.1276	53.3165
Con	17	L-R_forelimb	0.516129	0.16	0.15	0.31	3.22581	16.575	53.4678
Con	17	L-R_forelimb	0.571429	0.19	0.16	0.35	2.85714	16.4065	46.8757
Con	17	L-R_forelimb	0.512821	0.19	0.2	0.39	2.5641	17.7552	45.5262
Con	17	L-R_forelimb	0.515152	0.15	0.18	0.33	3.0303	19.7779	59.9329
Con	17	L-R_forelimb	0.555556	0.25	0.2	0.45	2.22222	13.3843	29.7428
Con	17	L-R_forelimb	0.518519	0.11	0.16	0.27	3.7037	20.4526	75.7504
Con	17	L-R_forelimb	0.555556	0.11	0.16	0.27	3.7037	18.095	67.0187
Con	17	L-R_forelimb	0.657895	0.2	0.18	0.38	2.63158	11.6908	30.7654
Con	17	L-R_forelimb	0.5	0.15	0.15	0.3	3.33333	15.5175	51.7249
Con	17	L-R_forelimb	0.555556	0.16	0.2	0.36	2.77778	12.9288	35.9133
Con	18	L-R_forelimb	0.517241	0.15	0.14	0.29	3.44828	16.149	55.6864
Con	18	L-R_forelimb	0.529412	0.19	0.15	0.34	2.94118	16.3728	48.1553
Con	18	L-R_forelimb	0.5	0.2	0.18	0.38	2.63158	13.396	35.2527
Con	18	L-R_forelimb	0.628571	0.21	0.14	0.35	2.85714	18.0955	51.7015
Con	18	L-R_forelimb	0.5	0.11	0.15	0.26	3.84615	18.1488	69.8032
Con	18	L-R_forelimb	0.535714	0.14	0.14	0.28	3.57143	16.8924	60.3302
Con	18	L-R_forelimb	0.545455	0.08	0.14	0.22	4.54545	20.3229	92.377
Con	18	L-R_forelimb	0.52381	0.09	0.12	0.21	4.7619	19.3038	91.9227
Con	18	L-R_forelimb	0.545455	0.1	0.12	0.22	4.54545	19.0305	86.5021
Con	18	L-R_forelimb	0.6	0.11	0.14	0.25	4	13.6305	54.5218
Con	18	L-R_forelimb	0.52	0.1	0.15	0.25	4	21.4701	85.8803
Con	18	L-R_forelimb	0.52381	0.08	0.13	0.21	4.7619	19.6112	93.3867
Con	1	L-R_forelimb	0.5625	0.15	0.17	0.32	3.125	21.5558	67.362
Con	1	L-R_forelimb	0.527778	0.16	0.2	0.36	2.77778	20.0374	55.6595
Con	1	L-R_forelimb	0.518519	0.12	0.15	0.27	3.7037	21.5528	79.8253
Con	1	L-R_forelimb	0.533333	0.14	0.16	0.3	3.33333	20.4065	68.0216
Con	1	L-R_forelimb	0.542857	0.17	0.18	0.35	2.85714	21.533	61.5229
Con	1	L-R_forelimb	0.641026	0.17	0.22	0.39	2.5641	12.5755	32.2449
Con	1	L-R_forelimb	0.53125	0.15	0.17	0.32	3.125	18.571	58.0344
Con	1	L-R_forelimb	0.529412	0.15	0.19	0.34	2.94118	22.7511	66.9149
Con	1	L-R_forelimb	0.521739	0.22	0.24	0.46	2.17391	19.3462	42.0569
Con	1	L-R_forelimb	0.525	0.19	0.21	0.4	2.5	18.2899	45.7248
Con	1	L-R_forelimb	0.5	0.15	0.17	0.32	3.125	22.2164	69.4262
Con	1	L-R_forelimb	0.533333	0.15	0.15	0.3	3.33333	19.5775	65.2583
Con	2	L-R_forelimb	0.5	0.12	0.14	0.26	3.84615	21.3501	82.1158
Con	2	L-R_forelimb	0.592593	0.11	0.16	0.27	3.7037	22.9408	84.9661
Con	2	L-R_forelimb	0.5	0.08	0.14	0.22	4.54545	25.7678	117.126
Con	2	L-R_forelimb	0.566667	0.15	0.15	0.3	3.33333	17.2479	57.493
Con	2	L-R_forelimb	0.657895	0.24	0.14	0.38	2.63158	8.91309	23.4555
Con	2	L-R_forelimb	0.518519	0.11	0.16	0.27	3.7037	20.8712	77.3007
Con	2	L-R_forelimb	0.571429	0.15	0.13	0.28	3.57143	14.206	50.7356
Con	2	L-R_forelimb	0.652174	0.26	0.2	0.46	2.17391	18.7584	40.7791
Con	2	L-R_forelimb	0.517241	0.15	0.14	0.29	3.44828	16.0174	55.2324
Con	2	L-R_forelimb	0.517241	0.12	0.17	0.29	3.44828	21.7274	74.9222
Con	2	L-R_forelimb	0.541667	0.11	0.13	0.24	4.16667	15.3888	64.12
Con	7	L-R_forelimb	0.514286	0.15	0.2	0.35	2.85714	17.7289	50.654
Con	7	L-R_forelimb	0.522727	0.22	0.22	0.44	2.27273	16.2985	37.0419
Con	7	L-R_forelimb	0.520833	0.28	0.2	0.48	2.08333	13.9813	29.1277
Con	7	L-R_forelimb	0.568966	0.38	0.2	0.58	1.72414	11.8038	20.3514
Con	7	L-R_forelimb	0.568627	0.26	0.25	0.51	1.96078	15.5912	30.5709
Con	7	L-R_forelimb	0.59375	0.15	0.17	0.32	3.125	19.2634	60.1983
Con	7	L-R_forelimb	0.535714	0.15	0.13	0.28	3.57143	13.5031	48.2255
Con	7	L-R_forelimb	0.52381	0.22	0.2	0.42	2.38095	12.2333	29.1269
Con	7	L-R_forelimb	0.512195	0.26	0.15	0.41	2.43902	12.1025	29.5184
Con	7	L-R_forelimb	0.592593	0.1	0.17	0.27	3.7037	20.4466	75.728
Con	8	L-R_forelimb	0.533333	0.15	0.15	0.3	3.33333	19.871	66.2367
Con	8	L-R_forelimb	0.548387	0.14	0.17	0.31	3.22581	15.5759	50.2447
Con	8	L-R_forelimb	0.516129	0.14	0.17	0.31	3.22581	21.0817	68.0053
Con	8	L-R_forelimb	0.5	0.12	0.16	0.28	3.57143	20.1359	71.9139
Con	8	L-R_forelimb	0.5	0.13	0.15	0.28	3.57143	19.7874	70.6692
Con	8	L-R_forelimb	0.657895	0.19	0.19	0.38	2.63158	14.3363	37.7272
Con	8	L-R_forelimb	0.592593	0.16	0.11	0.27	3.7037	15.108	55.9556
Con	8	L-R_forelimb	0.545455	0.21	0.23	0.44	2.27273	17.0836	38.8264
Con	8	L-R_forelimb	0.521739	0.09	0.14	0.23	4.34783	23.186	100.809
Con	9	L-R_forelimb	0.5	0.08	0.16	0.24	4.16667	23.9427	99.7613
Con	9	L-R_forelimb	0.59375	0.18	0.14	0.32	3.125	18.977	59.3032
Con	9	L-R_forelimb	0.516129	0.14	0.17	0.31	3.22581	17.4139	56.1738
Con	9	L-R_forelimb	0.55	0.08	0.12	0.2	5	18.5453	92.7263
Con	9	L-R_forelimb	0.56	0.12	0.13	0.25	4	17.0725	68.2901
Con	9	L-R_forelimb	0.5	0.17	0.13	0.3	3.33333	12.9505	43.1682
Con	9	L-R_forelimb	0.516129	0.16	0.15	0.31	3.22581	19.0361	61.4067
Con	9	L-R_forelimb	0.517241	0.13	0.16	0.29	3.44828	18.2236	62.8399
Con	9	L-R_forelimb	0.516129	0.18	0.13	0.31	3.22581	15.031	48.487
Con	10	L-R_forelimb	0.533333	0.14	0.16	0.3	3.33333	20.8545	69.5149
Con	10	L-R_forelimb	0.5	0.11	0.15	0.26	3.84615	21.9614	84.4668
Con	10	L-R_forelimb	0.515152	0.14	0.19	0.33	3.0303	17.3153	52.4705
Con	10	L-R_forelimb	0.548387	0.14	0.17	0.31	3.22581	20.0467	64.6666
Con	10	L-R_forelimb	0.5625	0.19	0.13	0.32	3.125	15.8406	49.5019
Con	10	L-R_forelimb	0.52381	0.2	0.22	0.42	2.38095	16.8582	40.1386
Con	10	L-R_forelimb	0.515152	0.16	0.17	0.33	3.0303	16.8967	51.2023
Con	10	L-R_forelimb	0.511628	0.23	0.2	0.43	2.32558	17.8981	41.6235
Con	10	L-R_forelimb	0.608696	0.11	0.12	0.23	4.34783	20.0875	87.337
Con	10	L-R_forelimb	0.52	0.1	0.15	0.25	4	21.0702	84.2807
Con	12	L-R_forelimb	0.5	0.08	0.16	0.24	4.16667	23.3771	97.4046
Con	12	L-R_forelimb	0.64	0.11	0.14	0.25	4	22.6641	90.6564
Con	12	L-R_forelimb	0.5	0.11	0.15	0.26	3.84615	21.7486	83.6486
Con	12	L-R_forelimb	0.535714	0.13	0.15	0.28	3.57143	15.3597	54.8562
Con	12	L-R_forelimb	0.511628	0.23	0.2	0.43	2.32558	15.8609	36.8859
Con	12	L-R_forelimb	0.555556	0.13	0.14	0.27	3.7037	19.3218	71.5624
Con	12	L-R_forelimb	0.5	0.18	0.14	0.32	3.125	16.7213	52.254
Con	12	L-R_forelimb	0.555556	0.14	0.13	0.27	3.7037	17.6101	65.2227
Con	13	L-R_forelimb	0.516129	0.13	0.18	0.31	3.22581	20.4622	66.0072
Con	13	L-R_forelimb	0.586207	0.12	0.17	0.29	3.44828	18.5555	63.9846
Con	13	L-R_forelimb	0.5	0.13	0.15	0.28	3.57143	19.4881	69.6002
Con	13	L-R_forelimb	0.580645	0.15	0.16	0.31	3.22581	13.7746	44.4341
Con	13	L-R_forelimb	0.5	0.09	0.15	0.24	4.16667	21.9668	91.5282
Con	13	L-R_forelimb	0.535714	0.17	0.11	0.28	3.57143	11.4238	40.7994
Con	14	L-R_forelimb	0.551724	0.14	0.15	0.29	3.44828	19.1078	65.889
Con	14	L-R_forelimb	0.565217	0.09	0.14	0.23	4.34783	21.7412	94.5267
Con	14	L-R_forelimb	0.511628	0.24	0.19	0.43	2.32558	15.9292	37.0448
Con	14	L-R_forelimb	0.541667	0.1	0.14	0.24	4.16667	18.5855	77.4398
Con	14	L-R_forelimb	0.5	0.11	0.15	0.26	3.84615	19.9089	76.5727
Con	14	L-R_forelimb	0.566667	0.14	0.16	0.3	3.33333	19.1717	63.9058
Con	15	L-R_forelimb	0.5	0.1	0.16	0.26	3.84615	21.3935	82.2828
Con	15	L-R_forelimb	0.518519	0.1	0.17	0.27	3.7037	22.1073	81.8789
Con	15	L-R_forelimb	0.538462	0.09	0.17	0.26	3.84615	21.7154	83.5206
Con	15	L-R_forelimb	0.56	0.08	0.17	0.25	4	23.3308	93.3231
Con	15	L-R_forelimb	0.5	0.21	0.21	0.42	2.38095	18.7206	44.5728
Con	15	L-R_forelimb	0.513514	0.2	0.17	0.37	2.7027	15.7316	42.5179
Con	15	L-R_forelimb	0.533333	0.12	0.18	0.3	3.33333	19.5057	65.0191
Con	15	L-R_forelimb	0.535714	0.12	0.16	0.28	3.57143	14.313	51.1178
Con	15	L-R_forelimb	0.576923	0.09	0.17	0.26	3.84615	20.6591	79.4582
Con	15	L-R_forelimb	0.565217	0.08	0.15	0.23	4.34783	20.7169	90.0736
Con	16	L-R_forelimb	0.56	0.11	0.14	0.25	4	16.2725	65.09
Con	16	L-R_forelimb	0.529412	0.2	0.14	0.34	2.94118	15.4934	45.5688
Con	16	L-R_forelimb	0.565217	0.1	0.13	0.23	4.34783	19.9523	86.7491
Con	16	L-R_forelimb	0.52	0.11	0.14	0.25	4	18.2756	73.1022
Con	16	L-R_forelimb	0.619048	0.17	0.25	0.42	2.38095	15.4402	36.7623
Con	16	L-R_forelimb	0.526316	0.19	0.19	0.38	2.63158	18.789	49.4448
Con	16	L-R_forelimb	0.607143	0.1	0.18	0.28	3.57143	17.7768	63.4884
Con	16	L-R_forelimb	0.517241	0.13	0.16	0.29	3.44828	17.3814	59.9357
Con	16	L-R_forelimb	0.529412	0.18	0.16	0.34	2.94118	16.7802	49.3535
Con	16	L-R_forelimb	0.5	0.14	0.14	0.28	3.57143	14.2021	50.7218
Con	17	L-R_forelimb	0.518519	0.11	0.16	0.27	3.7037	20.9062	77.4303
Con	17	L-R_forelimb	0.535714	0.12	0.16	0.28	3.57143	18.8396	67.2843
Con	17	L-R_forelimb	0.515152	0.18	0.15	0.33	3.0303	12.9667	39.2929
Con	17	L-R_forelimb	0.555556	0.19	0.26	0.45	2.22222	16.5739	36.831
Con	17	L-R_forelimb	0.552632	0.19	0.19	0.38	2.63158	18.6736	49.141
Con	17	L-R_forelimb	0.5	0.1	0.16	0.26	3.84615	18.9484	72.8784
Con	17	L-R_forelimb	0.538462	0.11	0.15	0.26	3.84615	16.7794	64.5363
Con	17	L-R_forelimb	0.59375	0.16	0.16	0.32	3.125	15.0466	47.0207
Con	17	L-R_forelimb	0.555556	0.18	0.18	0.36	2.77778	16.0209	44.5024
Con	18	L-R_forelimb	0.515152	0.17	0.16	0.33	3.0303	16.2932	49.3734
Con	18	L-R_forelimb	0.56	0.12	0.13	0.25	4	16.0697	64.2788
Con	18	L-R_forelimb	0.5625	0.21	0.11	0.32	3.125	10.9756	34.2988
Con	18	L-R_forelimb	0.538462	0.12	0.14	0.26	3.84615	18.0196	69.3063
Con	18	L-R_forelimb	0.517241	0.15	0.14	0.29	3.44828	15.458	53.3034
Con	18	L-R_forelimb	0.555556	0.15	0.12	0.27	3.7037	13.0757	48.4286
Con	18	L-R_forelimb	0.612903	0.16	0.15	0.31	3.22581	19.7195	63.6112
Con	18	L-R_forelimb	0.545455	0.18	0.15	0.33	3.0303	15.2057	46.0779
Con	18	L-R_forelimb	0.541667	0.13	0.11	0.24	4.16667	13.9074	57.9473
Con	18	L-R_forelimb	0.545455	0.08	0.14	0.22	4.54545	22.2226	101.012
Con	1	L-R_forelimb	0.515152	0.16	0.17	0.33	3.0303	20.7325	62.8259
Con	1	L-R_forelimb	0.533333	0.13	0.17	0.3	3.33333	22.8641	76.2138
Con	1	L-R_forelimb	0.515152	0.16	0.17	0.33	3.0303	18.622	56.4304
Con	1	L-R_forelimb	0.5	0.19	0.19	0.38	2.63158	22.7611	59.8977
Con	1	L-R_forelimb	0.558824	0.18	0.16	0.34	2.94118	20.2041	59.4238
Con	1	L-R_forelimb	0.533333	0.13	0.17	0.3	3.33333	22.5835	75.2784
Con	1	L-R_forelimb	0.525	0.2	0.2	0.4	2.5	18.6278	46.5694
Con	2	L-R_forelimb	0.555556	0.11	0.16	0.27	3.7037	22.1601	82.0743
Con	2	L-R_forelimb	0.518519	0.12	0.15	0.27	3.7037	21.5826	79.9357
Con	2	L-R_forelimb	0.52	0.13	0.12	0.25	4	13.4828	53.931
Con	2	L-R_forelimb	0.529412	0.26	0.25	0.51	1.96078	17.8007	34.9034
Con	2	L-R_forelimb	0.547619	0.2	0.22	0.42	2.38095	19.2029	45.7213
Con	2	L-R_forelimb	0.527778	0.17	0.19	0.36	2.77778	20.9512	58.1979
Con	2	L-R_forelimb	0.5	0.14	0.16	0.3	3.33333	19.0034	63.3447
Con	2	L-R_forelimb	0.517241	0.15	0.14	0.29	3.44828	15.9134	54.8737
Con	2	L-R_forelimb	0.514286	0.21	0.14	0.35	2.85714	13.1302	37.5148
Con	2	L-R_forelimb	0.5	0.18	0.18	0.36	2.77778	17.5087	48.6353
Con	7	L-R_forelimb	0.527778	0.16	0.2	0.36	2.77778	20.2962	56.3782
Con	7	L-R_forelimb	0.518519	0.14	0.13	0.27	3.7037	17.4254	64.5385
Con	7	L-R_forelimb	0.566667	0.16	0.14	0.3	3.33333	14.2345	47.4483
Con	7	L-R_forelimb	0.542857	0.17	0.18	0.35	2.85714	14.5532	41.5805
Con	7	L-R_forelimb	0.512821	0.22	0.17	0.39	2.5641	15.3966	39.4786
Con	7	L-R_forelimb	0.638298	0.21	0.26	0.47	2.12766	12.8252	27.2877
Con	7	L-R_forelimb	0.518519	0.11	0.16	0.27	3.7037	18.9951	70.3524
Con	7	L-R_forelimb	0.612903	0.11	0.2	0.31	3.22581	20.0624	64.7175
Con	7	L-R_forelimb	0.518519	0.12	0.15	0.27	3.7037	20.4702	75.8154
Con	8	L-R_forelimb	0.606061	0.16	0.17	0.33	3.0303	21.7082	65.7823
Con	8	L-R_forelimb	0.555556	0.13	0.14	0.27	3.7037	17.174	63.6073
Con	8	L-R_forelimb	0.521739	0.11	0.12	0.23	4.34783	18.5527	80.6638
Con	8	L-R_forelimb	0.555556	0.12	0.15	0.27	3.7037	17.8065	65.9499
Con	8	L-R_forelimb	0.571429	0.13	0.15	0.28	3.57143	16.6605	59.5019
Con	8	L-R_forelimb	0.6	0.1	0.15	0.25	4	20.5525	82.2099
Con	8	L-R_forelimb	0.545455	0.08	0.14	0.22	4.54545	21.0098	95.4991
Con	8	L-R_forelimb	0.516129	0.18	0.13	0.31	3.22581	12.5937	40.625
Con	9	L-R_forelimb	0.52	0.09	0.16	0.25	4	21.8824	87.5295
Con	9	L-R_forelimb	0.5	0.1	0.12	0.22	4.54545	17.2868	78.5764
Con	9	L-R_forelimb	0.55	0.07	0.13	0.2	5	23.92	119.6
Con	9	L-R_forelimb	0.608696	0.08	0.15	0.23	4.34783	24.5598	106.782
Con	9	L-R_forelimb	0.647059	0.07	0.1	0.17	5.88235	17.5032	102.96
Con	9	L-R_forelimb	0.585366	0.19	0.22	0.41	2.43902	14.7008	35.8557
Con	9	L-R_forelimb	0.583333	0.13	0.11	0.24	4.16667	13.3023	55.4263
Con	9	L-R_forelimb	0.621622	0.14	0.23	0.37	2.7027	13.5482	36.6169
Con	10	L-R_forelimb	0.565217	0.09	0.14	0.23	4.34783	22.9677	99.8596
Con	10	L-R_forelimb	0.5	0.09	0.13	0.22	4.54545	19.4679	88.4903
Con	10	L-R_forelimb	0.5	0.09	0.13	0.22	4.54545	21.2655	96.6612
Con	10	L-R_forelimb	0.542857	0.14	0.21	0.35	2.85714	18.6254	53.2155
Con	10	L-R_forelimb	0.529412	0.15	0.19	0.34	2.94118	17.4182	51.2301
Con	12	L-R_forelimb	0.518519	0.11	0.16	0.27	3.7037	21.2849	78.8328
Con	12	L-R_forelimb	0.518519	0.12	0.15	0.27	3.7037	20.1367	74.5803
Con	12	L-R_forelimb	0.580645	0.13	0.18	0.31	3.22581	19.7363	63.6654
Con	12	L-R_forelimb	0.548387	0.15	0.16	0.31	3.22581	19.9865	64.4727
Con	12	L-R_forelimb	0.6	0.12	0.13	0.25	4	16.8185	67.2742
Con	12	L-R_forelimb	0.5	0.08	0.14	0.22	4.54545	21.4821	97.6459
Con	12	L-R_forelimb	0.52	0.1	0.15	0.25	4	19.8025	79.21
Con	12	L-R_forelimb	0.516129	0.13	0.18	0.31	3.22581	19.1183	61.6718
Con	13	L-R_forelimb	0.55	0.19	0.21	0.4	2.5	20.1186	50.2965
Con	13	L-R_forelimb	0.515152	0.16	0.17	0.33	3.0303	19.6508	59.5479
Con	13	L-R_forelimb	0.52381	0.23	0.19	0.42	2.38095	16.4842	39.248
Con	13	L-R_forelimb	0.571429	0.1	0.18	0.28	3.57143	22.6182	80.7791
Con	13	L-R_forelimb	0.625	0.13	0.19	0.32	3.125	19.1333	59.7915
Con	13	L-R_forelimb	0.515152	0.16	0.17	0.33	3.0303	20.7195	62.7864
Con	13	L-R_forelimb	0.566667	0.12	0.18	0.3	3.33333	19.8649	66.2164
Con	13	L-R_forelimb	0.56	0.1	0.15	0.25	4	22.9007	91.6026
Con	13	L-R_forelimb	0.511628	0.22	0.21	0.43	2.32558	17.2864	40.2009
Con	13	L-R_forelimb	0.514286	0.15	0.2	0.35	2.85714	20.6789	59.0826
Con	14	L-R_forelimb	0.548387	0.16	0.15	0.31	3.22581	16.2125	52.2983
Con	14	L-R_forelimb	0.5	0.15	0.15	0.3	3.33333	16.8747	56.249
Con	14	L-R_forelimb	0.515152	0.17	0.16	0.33	3.0303	16.4295	49.7864
Con	14	L-R_forelimb	0.608696	0.09	0.14	0.23	4.34783	21.9333	95.3622
Con	14	L-R_forelimb	0.548387	0.16	0.15	0.31	3.22581	17.5567	56.6346
Con	14	L-R_forelimb	0.5	0.19	0.17	0.36	2.77778	14.9456	41.5156
Con	14	L-R_forelimb	0.517241	0.12	0.17	0.29	3.44828	20.8591	71.9278
Con	14	L-R_forelimb	0.518519	0.11	0.16	0.27	3.7037	18.3692	68.0339
Con	15	L-R_forelimb	0.512195	0.23	0.18	0.41	2.43902	16.6261	40.5514
Con	15	L-R_forelimb	0.533333	0.25	0.2	0.45	2.22222	15.6991	34.887
Con	15	L-R_forelimb	0.55	0.24	0.16	0.4	2.5	14.3175	35.7937
Con	15	L-R_forelimb	0.529412	0.19	0.15	0.34	2.94118	16.2	47.6471
Con	15	L-R_forelimb	0.55	0.19	0.21	0.4	2.5	17.9168	44.7921
Con	15	L-R_forelimb	0.551724	0.13	0.16	0.29	3.44828	20.7851	71.6728
Con	15	L-R_forelimb	0.514286	0.16	0.19	0.35	2.85714	21.4727	61.3504
Con	15	L-R_forelimb	0.512821	0.2	0.19	0.39	2.5641	19.7342	50.6005
Con	15	L-R_forelimb	0.5	0.14	0.16	0.3	3.33333	20.1423	67.1409
Con	15	L-R_forelimb	0.518519	0.11	0.16	0.27	3.7037	20.6515	76.4871
Con	15	L-R_forelimb	0.518519	0.11	0.16	0.27	3.7037	19.5444	72.3868
Con	16	L-R_forelimb	0.5	0.13	0.17	0.3	3.33333	20.6515	68.8383
Con	16	L-R_forelimb	0.56	0.12	0.13	0.25	4	17.5201	70.0806
Con	16	L-R_forelimb	0.59375	0.16	0.16	0.32	3.125	13.2822	41.5069
Con	16	L-R_forelimb	0.533333	0.13	0.17	0.3	3.33333	20.5553	68.5177
Con	16	L-R_forelimb	0.555556	0.12	0.15	0.27	3.7037	19.45	72.0372
Con	16	L-R_forelimb	0.5	0.13	0.13	0.26	3.84615	18.3089	70.419
Con	16	L-R_forelimb	0.575758	0.16	0.17	0.33	3.0303	14.1936	43.0108
Con	16	L-R_forelimb	0.576923	0.11	0.15	0.26	3.84615	19.9728	76.8187
Con	16	L-R_forelimb	0.552632	0.19	0.19	0.38	2.63158	19.9146	52.4068
Con	16	L-R_forelimb	0.555556	0.11	0.16	0.27	3.7037	18.5453	68.6865
Con	16	L-R_forelimb	0.526316	0.2	0.18	0.38	2.63158	11.5805	30.4751
Con	16	L-R_forelimb	0.548387	0.12	0.19	0.31	3.22581	19.7402	63.678
Con	17	L-R_forelimb	0.53125	0.16	0.16	0.32	3.125	18.1924	56.8511
Con	17	L-R_forelimb	0.538462	0.1	0.16	0.26	3.84615	20.0555	77.1366
Con	17	L-R_forelimb	0.529412	0.15	0.19	0.34	2.94118	18.1575	53.4044
Con	17	L-R_forelimb	0.529412	0.16	0.18	0.34	2.94118	17.367	51.0793
Con	17	L-R_forelimb	0.514286	0.16	0.19	0.35	2.85714	17.471	49.9171
Con	17	L-R_forelimb	0.535714	0.1	0.18	0.28	3.57143	19.4374	69.4192
Con	17	L-R_forelimb	0.533333	0.12	0.18	0.3	3.33333	16.854	56.18
Con	17	L-R_forelimb	0.575	0.18	0.22	0.4	2.5	17.865	44.6625
Con	17	L-R_forelimb	0.5	0.11	0.17	0.28	3.57143	20.7531	74.1182
Con	17	L-R_forelimb	0.518519	0.12	0.15	0.27	3.7037	15.9815	59.1908
Con	18	L-R_forelimb	0.5	0.16	0.18	0.34	2.94118	18.2012	53.5331
Con	18	L-R_forelimb	0.5	0.15	0.17	0.32	3.125	17.1556	53.6114
Con	18	L-R_forelimb	0.514286	0.2	0.15	0.35	2.85714	14.6132	41.7521
Con	18	L-R_forelimb	0.5	0.28	0.16	0.44	2.27273	13.8233	31.4166
Con	18	L-R_forelimb	0.574468	0.34	0.13	0.47	2.12766	11.0114	23.4286
Con	18	L-R_forelimb	0.535714	0.12	0.16	0.28	3.57143	19.3811	69.2181
Con	18	L-R_forelimb	0.516129	0.14	0.17	0.31	3.22581	15.3565	49.537
Con	18	L-R_forelimb	0.5	0.14	0.16	0.3	3.33333	17.8651	59.5505
Con	18	L-R_forelimb	0.535714	0.15	0.13	0.28	3.57143	16.461	58.7892
Con	18	L-R_forelimb	0.541667	0.1	0.14	0.24	4.16667	20.2268	84.2784
Con	18	L-R_forelimb	0.5	0.1	0.14	0.24	4.16667	17.0838	71.1826
Con	18	L-R_forelimb	0.5	0.08	0.14	0.22	4.54545	20.3378	92.4446
Con	18	L-R_forelimb	0.555556	0.13	0.14	0.27	3.7037	19.2745	71.3872
Con	18	L-R_forelimb	0.516129	0.16	0.15	0.31	3.22581	15.5683	50.2205
Dox	1	L-R_forelimb	0.5	0.15	0.17	0.32	3.125	19.7483	61.7134
Dox	1	L-R_forelimb	0.5	0.15	0.15	0.3	3.33333	17.9438	59.8128
Dox	1	L-R_forelimb	0.551724	0.14	0.15	0.29	3.44828	20.0513	69.1424
Dox	1	L-R_forelimb	0.516129	0.13	0.18	0.31	3.22581	19.6737	63.4635
Dox	1	L-R_forelimb	0.517241	0.13	0.16	0.29	3.44828	20.8273	71.8181
Dox	1	L-R_forelimb	0.5	0.13	0.17	0.3	3.33333	20.8075	69.3583
Dox	1	L-R_forelimb	0.533333	0.13	0.17	0.3	3.33333	21.4753	71.5845
Dox	2	L-R_forelimb	0.516129	0.14	0.17	0.31	3.22581	20.8379	67.2192
Dox	2	L-R_forelimb	0.5	0.13	0.17	0.3	3.33333	18.6587	62.1958
Dox	2	L-R_forelimb	0.580645	0.13	0.18	0.31	3.22581	19.571	63.1324
Dox	2	L-R_forelimb	0.571429	0.11	0.17	0.28	3.57143	21.0631	75.2252
Dox	2	L-R_forelimb	0.518519	0.11	0.16	0.27	3.7037	22.1028	81.8621
Dox	2	L-R_forelimb	0.5	0.1	0.16	0.26	3.84615	21.0633	81.0126
Dox	2	L-R_forelimb	0.5	0.09	0.15	0.24	4.16667	21.2204	88.4185
Dox	2	L-R_forelimb	0.541667	0.08	0.16	0.24	4.16667	19.6931	82.0548
Dox	2	L-R_forelimb	0.535714	0.11	0.17	0.28	3.57143	21.335	76.1965
Dox	2	L-R_forelimb	0.52	0.1	0.15	0.25	4	18.997	75.988
Dox	7	L-R_forelimb	0.548387	0.14	0.17	0.31	3.22581	17.5334	56.5593
Dox	7	L-R_forelimb	0.5	0.13	0.17	0.3	3.33333	18.0138	60.0461
Dox	7	L-R_forelimb	0.6	0.1	0.1	0.2	5	13.214	66.0702
Dox	7	L-R_forelimb	0.516129	0.14	0.17	0.31	3.22581	18.7635	60.5275
Dox	7	L-R_forelimb	0.592593	0.11	0.16	0.27	3.7037	19.2325	71.2316
Dox	7	L-R_forelimb	0.56	0.11	0.14	0.25	4	15.7413	62.9651
Dox	7	L-R_forelimb	0.515152	0.15	0.18	0.33	3.0303	17.5395	53.1501
Dox	7	L-R_forelimb	0.583333	0.15	0.21	0.36	2.77778	16.1919	44.9775
Dox	7	L-R_forelimb	0.741935	0.16	0.15	0.31	3.22581	11.9519	38.5546
Dox	7	L-R_forelimb	0.513514	0.16	0.21	0.37	2.7027	17.9371	48.4786
Dox	8	L-R_forelimb	0.515152	0.17	0.16	0.33	3.0303	15.3115	46.3985
Dox	8	L-R_forelimb	0.571429	0.2	0.15	0.35	2.85714	16.0564	45.8755
Dox	8	L-R_forelimb	0.535714	0.13	0.15	0.28	3.57143	18.7031	66.7968
Dox	8	L-R_forelimb	0.518519	0.14	0.13	0.27	3.7037	15.1669	56.1736
Dox	8	L-R_forelimb	0.53125	0.13	0.19	0.32	3.125	19.0098	59.4055
Dox	8	L-R_forelimb	0.5	0.14	0.14	0.28	3.57143	14.7145	52.5517
Dox	8	L-R_forelimb	0.611111	0.22	0.14	0.36	2.77778	15.205	42.236
Dox	8	L-R_forelimb	0.540541	0.19	0.18	0.37	2.7027	17.0891	46.1869
Dox	8	L-R_forelimb	0.560976	0.23	0.18	0.41	2.43902	15.7694	38.4621
Dox	8	L-R_forelimb	0.6	0.23	0.17	0.4	2.5	11.5304	28.8259
Dox	8	L-R_forelimb	0.53125	0.18	0.14	0.32	3.125	14.2301	44.4689
Dox	9	L-R_forelimb	0.5	0.15	0.19	0.34	2.94118	17.5068	51.4906
Dox	9	L-R_forelimb	0.516129	0.18	0.13	0.31	3.22581	13.542	43.6839
Dox	9	L-R_forelimb	0.575	0.24	0.16	0.4	2.5	14.3738	35.9344
Dox	9	L-R_forelimb	0.5	0.11	0.15	0.26	3.84615	17.7452	68.2508
Dox	9	L-R_forelimb	0.52	0.11	0.14	0.25	4	18.542	74.1678
Dox	9	L-R_forelimb	0.545455	0.12	0.21	0.33	3.0303	17.1523	51.9768
Dox	9	L-R_forelimb	0.576923	0.13	0.13	0.26	3.84615	14.8917	57.2757
Dox	9	L-R_forelimb	0.566667	0.17	0.13	0.3	3.33333	15.4278	51.4261
Dox	9	L-R_forelimb	0.533333	0.15	0.15	0.3	3.33333	17.3987	57.9958
Dox	9	L-R_forelimb	0.5	0.13	0.13	0.26	3.84615	14.511	55.8115
Dox	10	L-R_forelimb	0.53125	0.16	0.16	0.32	3.125	18.2686	57.0893
Dox	10	L-R_forelimb	0.5	0.14	0.14	0.28	3.57143	17.6544	63.0513
Dox	10	L-R_forelimb	0.517241	0.15	0.14	0.29	3.44828	16.7459	57.7446
Dox	10	L-R_forelimb	0.535714	0.12	0.16	0.28	3.57143	19.4038	69.2994
Dox	10	L-R_forelimb	0.535714	0.13	0.15	0.28	3.57143	17.9445	64.0874
Dox	10	L-R_forelimb	0.521739	0.09	0.14	0.23	4.34783	20.8118	90.486
Dox	10	L-R_forelimb	0.590909	0.1	0.12	0.22	4.54545	17.8828	81.2856
Dox	10	L-R_forelimb	0.571429	0.1	0.11	0.21	4.7619	17.6841	84.2099
Dox	10	L-R_forelimb	0.52	0.11	0.14	0.25	4	14.3932	57.5728
Dox	10	L-R_forelimb	0.571429	0.09	0.12	0.21	4.7619	18.5923	88.5348
Dox	10	L-R_forelimb	0.652174	0.1	0.13	0.23	4.34783	18.381	79.9173
Dox	10	L-R_forelimb	0.625	0.1	0.14	0.24	4.16667	16.478	68.6582
Dox	12	L-R_forelimb	0.56	0.1	0.15	0.25	4	20.9623	83.8492
Dox	12	L-R_forelimb	0.52	0.1	0.15	0.25	4	20.2288	80.9152
Dox	12	L-R_forelimb	0.545455	0.1	0.12	0.22	4.54545	13.9574	63.4428
Dox	12	L-R_forelimb	0.676471	0.19	0.15	0.34	2.94118	14.4386	42.4665
Dox	12	L-R_forelimb	0.533333	0.13	0.17	0.3	3.33333	17.4148	58.0494
Dox	12	L-R_forelimb	0.555556	0.13	0.14	0.27	3.7037	14.887	55.1369
Dox	13	L-R_forelimb	0.516129	0.14	0.17	0.31	3.22581	21.8004	70.3238
Dox	13	L-R_forelimb	0.56	0.11	0.14	0.25	4	19.834	79.336
Dox	13	L-R_forelimb	0.517241	0.13	0.16	0.29	3.44828	17.8112	61.4178
Dox	13	L-R_forelimb	0.65625	0.14	0.18	0.32	3.125	17.0246	53.2017
Dox	13	L-R_forelimb	0.5	0.11	0.15	0.26	3.84615	21.4071	82.3352
Dox	13	L-R_forelimb	0.527778	0.17	0.19	0.36	2.77778	20.1244	55.9011
Dox	13	L-R_forelimb	0.651163	0.26	0.17	0.43	2.32558	19.063	44.3326
Dox	13	L-R_forelimb	0.6875	0.15	0.17	0.32	3.125	15.2315	47.5984
Dox	13	L-R_forelimb	0.53125	0.18	0.14	0.32	3.125	14.6205	45.689
Dox	14	L-R_forelimb	0.592593	0.13	0.14	0.27	3.7037	18.3961	68.1336
Dox	14	L-R_forelimb	0.555556	0.13	0.14	0.27	3.7037	17.7651	65.7965
Dox	14	L-R_forelimb	0.535714	0.11	0.17	0.28	3.57143	21.8709	78.1105
Dox	14	L-R_forelimb	0.5	0.09	0.13	0.22	4.54545	18.0395	81.9977
Dox	14	L-R_forelimb	0.52381	0.08	0.13	0.21	4.7619	21.5795	102.759
Dox	14	L-R_forelimb	0.521739	0.1	0.13	0.23	4.34783	19.1277	83.164
Dox	14	L-R_forelimb	0.521739	0.11	0.12	0.23	4.34783	16.1305	70.1326
Dox	14	L-R_forelimb	0.533333	0.16	0.14	0.3	3.33333	16.7972	55.9906
Dox	14	L-R_forelimb	0.571429	0.13	0.15	0.28	3.57143	18.9008	67.503
Dox	15	L-R_forelimb	0.555556	0.1	0.17	0.27	3.7037	22.246	82.3928
Dox	15	L-R_forelimb	0.521739	0.09	0.14	0.23	4.34783	21.3555	92.85
Dox	15	L-R_forelimb	0.647059	0.05	0.12	0.17	5.88235	21.0577	123.869
Dox	15	L-R_forelimb	0.565217	0.09	0.14	0.23	4.34783	22.485	97.7607
Dox	15	L-R_forelimb	0.571429	0.08	0.13	0.21	4.7619	17.7618	84.5798
Dox	15	L-R_forelimb	0.71875	0.13	0.19	0.32	3.125	14.1004	44.0638
Dox	15	L-R_forelimb	0.514286	0.16	0.19	0.35	2.85714	13.3702	38.2006
Dox	15	L-R_forelimb	0.7	0.07	0.13	0.2	5	20.1214	100.607
Dox	15	L-R_forelimb	0.727273	0.07	0.15	0.22	4.54545	20.1712	91.6873
Dox	16	L-R_forelimb	0.56	0.09	0.16	0.25	4	20.1285	80.5142
Dox	16	L-R_forelimb	0.64	0.09	0.16	0.25	4	17.0427	68.1707
Dox	16	L-R_forelimb	0.571429	0.11	0.17	0.28	3.57143	17.3138	61.8352
Dox	16	L-R_forelimb	0.653846	0.11	0.15	0.26	3.84615	16.8367	64.7566
Dox	16	L-R_forelimb	0.636364	0.09	0.13	0.22	4.54545	15.2787	69.4488
Dox	16	L-R_forelimb	0.586207	0.13	0.16	0.29	3.44828	16.0607	55.3818
Dox	16	L-R_forelimb	0.555556	0.12	0.15	0.27	3.7037	16.4351	60.8706
Dox	16	L-R_forelimb	0.541667	0.09	0.15	0.24	4.16667	21.3202	88.8342
Dox	16	L-R_forelimb	0.590909	0.09	0.13	0.22	4.54545	18.5301	84.2275
Dox	17	L-R_forelimb	0.535714	0.13	0.15	0.28	3.57143	19.0321	67.9719
Dox	17	L-R_forelimb	0.538462	0.11	0.15	0.26	3.84615	15.8877	61.1066
Dox	17	L-R_forelimb	0.942857	0.18	0.17	0.35	2.85714	9.91326	28.3236
Dox	17	L-R_forelimb	0.769231	0.18	0.21	0.39	2.5641	17.1797	44.0505
Dox	17	L-R_forelimb	0.545455	0.06	0.16	0.22	4.54545	23.7065	107.757
Dox	17	L-R_forelimb	0.52	0.1	0.15	0.25	4	18.1579	72.6316
Dox	18	L-R_forelimb	0.565217	0.09	0.14	0.23	4.34783	21.8554	95.0235
Dox	18	L-R_forelimb	0.521739	0.08	0.15	0.23	4.34783	23.3279	101.426
Dox	18	L-R_forelimb	0.6	0.07	0.13	0.2	5	22.361	111.805
Dox	18	L-R_forelimb	0.515152	0.19	0.14	0.33	3.0303	12.5393	37.9978
Dox	18	L-R_forelimb	0.526316	0.23	0.15	0.38	2.63158	12.543	33.0079
Dox	18	L-R_forelimb	0.575	0.25	0.15	0.4	2.5	11.6858	29.2145
Dox	18	L-R_forelimb	0.571429	0.19	0.16	0.35	2.85714	12.5099	35.7426
Dox	18	L-R_forelimb	0.578947	0.2	0.18	0.38	2.63158	12.8678	33.8627
Dox	18	L-R_forelimb	0.566667	0.17	0.13	0.3	3.33333	14.2167	47.3889
Dox	18	L-R_forelimb	0.517241	0.13	0.16	0.29	3.44828	18.3435	63.2536
Dox	18	L-R_forelimb	0.545455	0.07	0.15	0.22	4.54545	22.5303	102.41
Dox	18	L-R_forelimb	0.666667	0.06	0.12	0.18	5.55556	19.441	108.006
Dox	1	L-R_forelimb	0.515152	0.17	0.16	0.33	3.0303	18.7201	56.7275
Dox	1	L-R_forelimb	0.551724	0.14	0.15	0.29	3.44828	18.4923	63.7666
Dox	1	L-R_forelimb	0.516129	0.16	0.15	0.31	3.22581	18.7818	60.5863
Dox	1	L-R_forelimb	0.551724	0.14	0.15	0.29	3.44828	16.3727	56.4575
Dox	1	L-R_forelimb	0.53125	0.16	0.16	0.32	3.125	18.2623	57.0698
Dox	1	L-R_forelimb	0.606061	0.14	0.19	0.33	3.0303	18.3209	55.5177
Dox	1	L-R_forelimb	0.529412	0.18	0.16	0.34	2.94118	17.7655	52.2514
Dox	1	L-R_forelimb	0.548387	0.16	0.15	0.31	3.22581	15.5184	50.0593
Dox	1	L-R_forelimb	0.586207	0.14	0.15	0.29	3.44828	19.1997	66.2057
Dox	1	L-R_forelimb	0.62963	0.13	0.14	0.27	3.7037	17.5184	64.8829
Dox	2	L-R_forelimb	0.516129	0.15	0.16	0.31	3.22581	20.3644	65.6917
Dox	2	L-R_forelimb	0.595238	0.21	0.21	0.42	2.38095	16.1691	38.4979
Dox	2	L-R_forelimb	0.5	0.18	0.16	0.34	2.94118	19.0797	56.1169
Dox	2	L-R_forelimb	0.578947	0.19	0.19	0.38	2.63158	13.2325	34.8224
Dox	2	L-R_forelimb	0.525	0.2	0.2	0.4	2.5	13.3281	33.3202
Dox	2	L-R_forelimb	0.633333	0.16	0.14	0.3	3.33333	15.4063	51.3543
Dox	2	L-R_forelimb	0.5	0.15	0.15	0.3	3.33333	16.0657	53.5525
Dox	2	L-R_forelimb	0.619048	0.23	0.19	0.42	2.38095	19.3019	45.9569
Dox	2	L-R_forelimb	0.560976	0.18	0.23	0.41	2.43902	17.697	43.1634
Dox	7	L-R_forelimb	0.548387	0.13	0.18	0.31	3.22581	19.313	62.3001
Dox	7	L-R_forelimb	0.517241	0.14	0.15	0.29	3.44828	16.5788	57.1683
Dox	7	L-R_forelimb	0.628571	0.2	0.15	0.35	2.85714	11.2053	32.0152
Dox	7	L-R_forelimb	0.644444	0.27	0.18	0.45	2.22222	18.5899	41.311
Dox	7	L-R_forelimb	0.542857	0.19	0.16	0.35	2.85714	12.9252	36.9292
Dox	7	L-R_forelimb	0.534884	0.25	0.18	0.43	2.32558	10.8298	25.1855
Dox	7	L-R_forelimb	0.512821	0.21	0.18	0.39	2.5641	12.8673	32.9931
Dox	7	L-R_forelimb	0.575758	0.18	0.15	0.33	3.0303	12.6829	38.433
Dox	7	L-R_forelimb	0.515152	0.17	0.16	0.33	3.0303	12.7461	38.6247
Dox	7	L-R_forelimb	0.62963	0.12	0.15	0.27	3.7037	18.5993	68.8862
Dox	7	L-R_forelimb	0.615385	0.13	0.13	0.26	3.84615	14.9824	57.6248
Dox	8	L-R_forelimb	0.517241	0.16	0.13	0.29	3.44828	14.6225	50.4224
Dox	8	L-R_forelimb	0.538462	0.26	0.13	0.39	2.5641	16.0668	41.1969
Dox	8	L-R_forelimb	0.5	0.1	0.14	0.24	4.16667	18.8213	78.422
Dox	8	L-R_forelimb	0.551724	0.14	0.15	0.29	3.44828	17.1367	59.0919
Dox	8	L-R_forelimb	0.538462	0.13	0.13	0.26	3.84615	14.4992	55.766
Dox	8	L-R_forelimb	0.548387	0.16	0.15	0.31	3.22581	15.7276	50.734
Dox	8	L-R_forelimb	0.631579	0.22	0.16	0.38	2.63158	13.8768	36.5179
Dox	8	L-R_forelimb	0.5	0.13	0.13	0.26	3.84615	16.2293	62.4202
Dox	8	L-R_forelimb	0.6	0.17	0.13	0.3	3.33333	8.80471	29.349
Dox	8	L-R_forelimb	0.558824	0.17	0.17	0.34	2.94118	17.3684	51.0837
Dox	9	L-R_forelimb	0.518519	0.12	0.15	0.27	3.7037	19.487	72.1742
Dox	9	L-R_forelimb	0.52	0.11	0.14	0.25	4	18.0341	72.1365
Dox	9	L-R_forelimb	0.55	0.08	0.12	0.2	5	19.2353	96.1767
Dox	9	L-R_forelimb	0.52381	0.09	0.12	0.21	4.7619	18.1688	86.518
Dox	9	L-R_forelimb	0.736842	0.08	0.11	0.19	5.26316	15.3037	80.5459
Dox	9	L-R_forelimb	0.761905	0.1	0.11	0.21	4.7619	14.7763	70.3631
Dox	9	L-R_forelimb	0.65	0.11	0.09	0.2	5	10.9995	54.9974
Dox	9	L-R_forelimb	0.653846	0.12	0.14	0.26	3.84615	15.4772	59.5277
Dox	9	L-R_forelimb	0.571429	0.12	0.16	0.28	3.57143	15.3907	54.9669
Dox	9	L-R_forelimb	0.777778	0.13	0.14	0.27	3.7037	15.6991	58.1447
Dox	10	L-R_forelimb	0.5	0.11	0.13	0.24	4.16667	20.1284	83.8683
Dox	10	L-R_forelimb	0.56	0.11	0.14	0.25	4	18.0876	72.3505
Dox	10	L-R_forelimb	0.566667	0.12	0.18	0.3	3.33333	16.6102	55.3673
Dox	10	L-R_forelimb	0.551724	0.14	0.15	0.29	3.44828	17.1104	59.0013
Dox	10	L-R_forelimb	0.608696	0.09	0.14	0.23	4.34783	20.8809	90.7866
Dox	10	L-R_forelimb	0.681818	0.09	0.13	0.22	4.54545	17.5338	79.6992
Dox	10	L-R_forelimb	0.684211	0.06	0.13	0.19	5.26316	21.2195	111.681
Dox	10	L-R_forelimb	0.761905	0.08	0.13	0.21	4.7619	19.1196	91.0456
Dox	10	L-R_forelimb	0.517241	0.12	0.17	0.29	3.44828	20.5437	70.8404
Dox	10	L-R_forelimb	0.571429	0.12	0.16	0.28	3.57143	18.3031	65.3683
Dox	12	L-R_forelimb	0.541667	0.11	0.13	0.24	4.16667	19.3819	80.7579
Dox	12	L-R_forelimb	0.545455	0.1	0.12	0.22	4.54545	17.6999	80.4542
Dox	12	L-R_forelimb	0.53125	0.17	0.15	0.32	3.125	15.6914	49.0356
Dox	12	L-R_forelimb	0.589744	0.19	0.2	0.39	2.5641	15.4511	39.6181
Dox	12	L-R_forelimb	0.526316	0.21	0.17	0.38	2.63158	15.2315	40.0828
Dox	12	L-R_forelimb	0.578947	0.22	0.16	0.38	2.63158	13.462	35.4263
Dox	12	L-R_forelimb	0.522727	0.28	0.16	0.44	2.27273	8.02412	18.2366
Dox	12	L-R_forelimb	0.571429	0.08	0.13	0.21	4.7619	18.4842	88.0201
Dox	12	L-R_forelimb	0.521739	0.09	0.14	0.23	4.34783	18.1729	79.0125
Dox	13	L-R_forelimb	0.576923	0.11	0.15	0.26	3.84615	18.0389	69.3805
Dox	13	L-R_forelimb	0.518519	0.13	0.14	0.27	3.7037	16.224	60.089
Dox	13	L-R_forelimb	0.541667	0.1	0.14	0.24	4.16667	18.0986	75.4108
Dox	13	L-R_forelimb	0.565217	0.11	0.12	0.23	4.34783	16.7276	72.7288
Dox	13	L-R_forelimb	0.533333	0.15	0.15	0.3	3.33333	16.8504	56.1678
Dox	13	L-R_forelimb	0.571429	0.09	0.12	0.21	4.7619	20.136	95.8856
Dox	14	L-R_forelimb	0.642857	0.14	0.14	0.28	3.57143	17.0279	60.8139
Dox	14	L-R_forelimb	0.53125	0.16	0.16	0.32	3.125	16.7716	52.4114
Dox	14	L-R_forelimb	0.541667	0.09	0.15	0.24	4.16667	20.1379	83.9079
Dox	14	L-R_forelimb	0.52	0.1	0.15	0.25	4	20.3023	81.2093
Dox	14	L-R_forelimb	0.571429	0.13	0.15	0.28	3.57143	19.1731	68.4753
Dox	14	L-R_forelimb	0.615385	0.11	0.15	0.26	3.84615	19.423	74.7037
Dox	14	L-R_forelimb	0.521739	0.28	0.18	0.46	2.17391	14.1079	30.6694
Dox	14	L-R_forelimb	0.5625	0.18	0.14	0.32	3.125	16.1356	50.4237
Dox	14	L-R_forelimb	0.521739	0.09	0.14	0.23	4.34783	20.0771	87.2919
Dox	14	L-R_forelimb	0.5	0.1	0.12	0.22	4.54545	14.8732	67.6053
Dox	14	L-R_forelimb	0.521739	0.11	0.12	0.23	4.34783	16.7141	72.6698
Dox	15	L-R_forelimb	0.521739	0.09	0.14	0.23	4.34783	19.3521	84.1394
Dox	15	L-R_forelimb	0.5	0.11	0.13	0.24	4.16667	12.596	52.4833
Dox	15	L-R_forelimb	0.666667	0.08	0.13	0.21	4.7619	19.8706	94.622
Dox	15	L-R_forelimb	0.619048	0.08	0.13	0.21	4.7619	16.8929	80.4425
Dox	15	L-R_forelimb	0.586207	0.12	0.17	0.29	3.44828	14.852	51.2137
Dox	15	L-R_forelimb	0.615385	0.12	0.14	0.26	3.84615	19.0723	73.3548
Dox	15	L-R_forelimb	0.551724	0.14	0.15	0.29	3.44828	15.9225	54.905
Dox	15	L-R_forelimb	0.695652	0.09	0.14	0.23	4.34783	20.8956	90.8506
Dox	15	L-R_forelimb	0.789474	0.07	0.12	0.19	5.26316	20.0538	105.546
Dox	16	L-R_forelimb	0.56	0.11	0.14	0.25	4	18.5118	74.0472
Dox	16	L-R_forelimb	0.518519	0.12	0.15	0.27	3.7037	20.9973	77.7678
Dox	16	L-R_forelimb	0.521739	0.11	0.12	0.23	4.34783	14.1117	61.3553
Dox	16	L-R_forelimb	0.714286	0.09	0.19	0.28	3.57143	23.965	85.5891
Dox	16	L-R_forelimb	0.833333	0.06	0.12	0.18	5.55556	18.2114	101.174
Dox	17	L-R_forelimb	0.515152	0.17	0.16	0.33	3.0303	16.9443	51.3463
Dox	17	L-R_forelimb	0.5	0.15	0.17	0.32	3.125	19.7551	61.7348
Dox	17	L-R_forelimb	0.52	0.1	0.15	0.25	4	22.0938	88.3754
Dox	17	L-R_forelimb	0.565217	0.09	0.14	0.23	4.34783	20.6169	89.6387
Dox	17	L-R_forelimb	0.52	0.11	0.14	0.25	4	20.0902	80.3609
Dox	17	L-R_forelimb	0.541667	0.12	0.12	0.24	4.16667	14.233	59.3043
Dox	17	L-R_forelimb	0.538462	0.09	0.17	0.26	3.84615	20.7844	79.94
Dox	17	L-R_forelimb	0.52	0.09	0.16	0.25	4	20.8934	83.5735
Dox	17	L-R_forelimb	0.65	0.07	0.13	0.2	5	20.2061	101.031
Dox	18	L-R_forelimb	0.521739	0.1	0.13	0.23	4.34783	20.247	88.0306
Dox	18	L-R_forelimb	0.5	0.09	0.15	0.24	4.16667	21.7738	90.724
Dox	18	L-R_forelimb	0.545455	0.11	0.11	0.22	4.54545	12.2112	55.5053
Dox	18	L-R_forelimb	0.5	0.14	0.16	0.3	3.33333	20.4704	68.2346
Dox	18	L-R_forelimb	0.56	0.12	0.13	0.25	4	14.3602	57.4406
Dox	18	L-R_forelimb	0.521739	0.11	0.12	0.23	4.34783	16.936	73.6347
Dox	18	L-R_forelimb	0.52	0.1	0.15	0.25	4	19.8965	79.5858
Dox	18	L-R_forelimb	0.583333	0.12	0.12	0.24	4.16667	12.2563	51.0678
Dox	18	L-R_forelimb	0.52381	0.08	0.13	0.21	4.7619	21.997	104.748
Dox	18	L-R_forelimb	0.75	0.06	0.14	0.2	5	26.3795	131.898
Dox	18	L-R_forelimb	0.75	0.07	0.09	0.16	6.25	17.0448	106.53
Dox	1	L-R_forelimb	0.941176	0.17	0.17	0.34	2.94118	19.3985	57.0545
Dox	1	L-R_forelimb	0.9375	0.15	0.17	0.32	3.125	22.7631	71.1348
Dox	1	L-R_forelimb	1	0.15	0.17	0.32	3.125	22.7631	71.1348
Dox	1	L-R_forelimb	0.558824	0.18	0.16	0.34	2.94118	21.0564	61.9305
Dox	1	L-R_forelimb	0.575758	0.17	0.16	0.33	3.0303	18.2012	55.1552
Dox	1	L-R_forelimb	0.567568	0.18	0.19	0.37	2.7027	18.9741	51.2813
Dox	1	L-R_forelimb	0.512821	0.18	0.21	0.39	2.5641	19.6978	50.5071
Dox	1	L-R_forelimb	0.595238	0.22	0.2	0.42	2.38095	14.5947	34.7492
Dox	1	L-R_forelimb	0.581395	0.2	0.23	0.43	2.32558	17.8609	41.537
Dox	1	L-R_forelimb	0.55814	0.23	0.2	0.43	2.32558	17.963	41.7745
Dox	1	L-R_forelimb	0.568182	0.21	0.23	0.44	2.27273	15.6495	35.5669
Dox	2	L-R_forelimb	0.538462	0.12	0.14	0.26	3.84615	15.8215	60.8521
Dox	2	L-R_forelimb	0.611111	0.2	0.16	0.36	2.77778	17.2172	47.8254
Dox	2	L-R_forelimb	0.52	0.1	0.15	0.25	4	20.4329	81.7314
Dox	2	L-R_forelimb	0.538462	0.12	0.14	0.26	3.84615	17.1028	65.78
Dox	2	L-R_forelimb	0.517241	0.13	0.16	0.29	3.44828	16.0611	55.3831
Dox	2	L-R_forelimb	0.590909	0.08	0.14	0.22	4.54545	19.8486	90.2209
Dox	2	L-R_forelimb	0.5	0.09	0.13	0.22	4.54545	17.9487	81.5848
Dox	2	L-R_forelimb	0.6	0.14	0.16	0.3	3.33333	17.6636	58.8787
Dox	2	L-R_forelimb	0.5	0.12	0.14	0.26	3.84615	19.3788	74.5337
Dox	7	L-R_forelimb	0.533333	0.14	0.16	0.3	3.33333	18.2325	60.7749
Dox	7	L-R_forelimb	0.516129	0.13	0.18	0.31	3.22581	16.1836	52.2051
Dox	7	L-R_forelimb	0.577778	0.29	0.16	0.45	2.22222	12.6001	28.0003
Dox	7	L-R_forelimb	0.536585	0.21	0.2	0.41	2.43902	16.1824	39.4692
Dox	7	L-R_forelimb	0.571429	0.18	0.17	0.35	2.85714	13.6873	39.1065
Dox	7	L-R_forelimb	0.578947	0.19	0.19	0.38	2.63158	11.195	29.4606
Dox	7	L-R_forelimb	0.607143	0.14	0.14	0.28	3.57143	12.7483	45.5296
Dox	7	L-R_forelimb	0.564103	0.19	0.2	0.39	2.5641	15.1348	38.8071
Dox	7	L-R_forelimb	0.594595	0.14	0.23	0.37	2.7027	18.0622	48.8167
Dox	7	L-R_forelimb	0.551724	0.12	0.17	0.29	3.44828	17.3684	59.891
Dox	8	L-R_forelimb	0.542857	0.21	0.14	0.35	2.85714	14.6236	41.7817
Dox	8	L-R_forelimb	0.541667	0.1	0.14	0.24	4.16667	20.6372	85.9883
Dox	8	L-R_forelimb	0.6	0.2	0.2	0.4	2.5	14.9489	37.3722
Dox	8	L-R_forelimb	0.575758	0.18	0.15	0.33	3.0303	12.8579	38.9633
Dox	8	L-R_forelimb	0.513514	0.2	0.17	0.37	2.7027	11.7733	31.8197
Dox	8	L-R_forelimb	0.536585	0.25	0.16	0.41	2.43902	14.7735	36.0328
Dox	8	L-R_forelimb	0.538462	0.2	0.19	0.39	2.5641	16.4469	42.1716
Dox	8	L-R_forelimb	0.515152	0.17	0.16	0.33	3.0303	16.4784	49.9346
Dox	8	L-R_forelimb	0.517241	0.14	0.15	0.29	3.44828	17.6607	60.899
Dox	9	L-R_forelimb	0.538462	0.12	0.14	0.26	3.84615	17.3192	66.6123
Dox	9	L-R_forelimb	0.535714	0.13	0.15	0.28	3.57143	17.463	62.368
Dox	9	L-R_forelimb	0.764706	0.06	0.11	0.17	5.88235	17.7511	104.419
Dox	9	L-R_forelimb	0.666667	0.08	0.13	0.21	4.7619	14.7384	70.1829
Dox	9	L-R_forelimb	0.684211	0.06	0.13	0.19	5.26316	17.4079	91.6207
Dox	9	L-R_forelimb	0.538462	0.12	0.14	0.26	3.84615	16.1877	62.2603
Dox	9	L-R_forelimb	0.516129	0.16	0.15	0.31	3.22581	16.7096	53.902
Dox	9	L-R_forelimb	1	0.06	0.09	0.15	6.66667	17.2333	114.888
Dox	9	L-R_forelimb	1	0.07	0.09	0.16	6.25	14.4221	90.1381
Dox	10	L-R_forelimb	0.521739	0.09	0.14	0.23	4.34783	21.973	95.535
Dox	10	L-R_forelimb	0.590909	0.11	0.11	0.22	4.54545	18.8474	85.6701
Dox	10	L-R_forelimb	0.571429	0.09	0.12	0.21	4.7619	19.2839	91.8281
Dox	10	L-R_forelimb	0.703704	0.11	0.16	0.27	3.7037	15.3697	56.9248
Dox	10	L-R_forelimb	0.52	0.11	0.14	0.25	4	19.5063	78.0254
Dox	10	L-R_forelimb	0.684211	0.07	0.12	0.19	5.26316	18.3392	96.5222
Dox	10	L-R_forelimb	0.736842	0.07	0.12	0.19	5.26316	20.5112	107.953
Dox	10	L-R_forelimb	0.736842	0.07	0.12	0.19	5.26316	21.2536	111.861
Dox	12	L-R_forelimb	0.619048	0.08	0.13	0.21	4.7619	20.1159	95.7899
Dox	12	L-R_forelimb	0.631579	0.07	0.12	0.19	5.26316	19.4544	102.392
Dox	12	L-R_forelimb	0.521739	0.1	0.13	0.23	4.34783	18.1883	79.0796
Dox	12	L-R_forelimb	0.576923	0.12	0.14	0.26	3.84615	15.458	59.4538
Dox	12	L-R_forelimb	0.541667	0.09	0.15	0.24	4.16667	20.8817	87.0073
Dox	12	L-R_forelimb	0.575758	0.19	0.14	0.33	3.0303	15.9541	48.3458
Dox	12	L-R_forelimb	0.529412	0.18	0.16	0.34	2.94118	13.9871	41.1387
Dox	12	L-R_forelimb	0.590909	0.26	0.18	0.44	2.27273	12.3296	28.0219
Dox	12	L-R_forelimb	0.583333	0.3	0.18	0.48	2.08333	11.6908	24.3559
Dox	12	L-R_forelimb	0.521739	0.28	0.18	0.46	2.17391	14.4712	31.4591
Dox	12	L-R_forelimb	0.526316	0.2	0.18	0.38	2.63158	12.6335	33.2461
Dox	13	L-R_forelimb	0.555556	0.12	0.15	0.27	3.7037	20.3452	75.3528
Dox	13	L-R_forelimb	0.533333	0.25	0.2	0.45	2.22222	13.3415	29.6477
Dox	13	L-R_forelimb	0.526316	0.33	0.24	0.57	1.75439	14.9989	26.3138
Dox	13	L-R_forelimb	0.512195	0.24	0.17	0.41	2.43902	17.784	43.3755
Dox	13	L-R_forelimb	0.517241	0.14	0.15	0.29	3.44828	14.3143	49.3598
Dox	13	L-R_forelimb	0.540541	0.2	0.17	0.37	2.7027	14.9903	40.5143
Dox	13	L-R_forelimb	0.545455	0.18	0.15	0.33	3.0303	16.8922	51.1884
Dox	13	L-R_forelimb	0.512821	0.22	0.17	0.39	2.5641	12.9767	33.2736
Dox	14	L-R_forelimb	0.5	0.11	0.15	0.26	3.84615	19.7369	75.9113
Dox	14	L-R_forelimb	0.5	0.12	0.14	0.26	3.84615	16.239	62.4576
Dox	14	L-R_forelimb	0.652174	0.09	0.14	0.23	4.34783	21.9912	95.614
Dox	14	L-R_forelimb	0.636364	0.08	0.14	0.22	4.54545	21.711	98.6865
Dox	14	L-R_forelimb	0.6	0.13	0.17	0.3	3.33333	20.2447	67.4824
Dox	14	L-R_forelimb	0.555556	0.11	0.16	0.27	3.7037	17.5932	65.1599
Dox	14	L-R_forelimb	0.521739	0.09	0.14	0.23	4.34783	21.0401	91.4786
Dox	14	L-R_forelimb	0.541667	0.09	0.15	0.24	4.16667	19.6035	81.6811
Dox	14	L-R_forelimb	0.538462	0.13	0.13	0.26	3.84615	17.5621	67.5464
Dox	14	L-R_forelimb	0.518519	0.13	0.14	0.27	3.7037	16.921	62.6705
Dox	15	L-R_forelimb	0.56	0.1	0.15	0.25	4	20.9938	83.9752
Dox	15	L-R_forelimb	0.869565	0.06	0.17	0.23	4.34783	27.2367	118.42
Dox	15	L-R_forelimb	0.8	0.06	0.09	0.15	6.66667	19.3713	129.142
Dox	15	L-R_forelimb	0.789474	0.06	0.13	0.19	5.26316	26.8016	141.061
Dox	15	L-R_forelimb	0.538462	0.1	0.16	0.26	3.84615	18.3758	70.6763
Dox	15	L-R_forelimb	0.583333	0.1	0.14	0.24	4.16667	18.4686	76.9523
Dox	15	L-R_forelimb	0.55	0.09	0.11	0.2	5	17.738	88.6901
Dox	15	L-R_forelimb	0.592593	0.13	0.14	0.27	3.7037	15.1169	55.9887
Dox	15	L-R_forelimb	0.677419	0.09	0.22	0.31	3.22581	27.9226	90.0731
Dox	16	L-R_forelimb	0.5	0.09	0.15	0.24	4.16667	22.6413	94.3386
Dox	16	L-R_forelimb	0.518519	0.12	0.15	0.27	3.7037	21.0287	77.884
Dox	16	L-R_forelimb	0.545455	0.09	0.13	0.22	4.54545	19.3002	87.7282
Dox	16	L-R_forelimb	0.5	0.2	0.16	0.36	2.77778	14.9262	41.4617
Dox	16	L-R_forelimb	0.5	0.19	0.17	0.36	2.77778	16.8765	46.879
Dox	16	L-R_forelimb	0.552632	0.2	0.18	0.38	2.63158	14.1383	37.206
Dox	16	L-R_forelimb	0.74	0.33	0.17	0.5	2	17.6599	35.3198
Dox	16	L-R_forelimb	0.533333	0.14	0.16	0.3	3.33333	15.2568	50.8561
Dox	17	L-R_forelimb	0.56	0.1	0.15	0.25	4	21.3938	85.5751
Dox	17	L-R_forelimb	0.521739	0.09	0.14	0.23	4.34783	19.8862	86.4619
Dox	17	L-R_forelimb	0.538462	0.1	0.16	0.26	3.84615	22.771	87.5808
Dox	17	L-R_forelimb	0.521739	0.09	0.14	0.23	4.34783	21.0581	91.557
Dox	17	L-R_forelimb	0.571429	0.08	0.13	0.21	4.7619	22.2867	106.127
Dox	17	L-R_forelimb	0.605263	0.18	0.2	0.38	2.63158	17.7621	46.7425
Dox	17	L-R_forelimb	0.59375	0.14	0.18	0.32	3.125	18.3524	57.3514
Dox	17	L-R_forelimb	0.5	0.09	0.13	0.22	4.54545	19.9993	90.906
Dox	17	L-R_forelimb	0.52	0.09	0.16	0.25	4	18.8345	75.3378
Dox	17	L-R_forelimb	0.5	0.1	0.16	0.26	3.84615	21.5117	82.7374
Dox	18	L-R_forelimb	0.52	0.12	0.13	0.25	4	19.6201	78.4805
Dox	18	L-R_forelimb	0.541667	0.11	0.13	0.24	4.16667	19.5634	81.5143
Dox	18	L-R_forelimb	0.571429	0.08	0.13	0.21	4.7619	20.6804	98.4783
Dox	18	L-R_forelimb	0.5	0.08	0.14	0.22	4.54545	22.8139	103.7
Dox	18	L-R_forelimb	0.521739	0.11	0.12	0.23	4.34783	15.6535	68.0589
Dox	18	L-R_forelimb	0.526316	0.09	0.1	0.19	5.26316	15.3212	80.638
Dox	18	L-R_forelimb	0.684211	0.06	0.13	0.19	5.26316	21.5173	113.249
Dox	18	L-R_forelimb	0.7	0.07	0.13	0.2	5	19.9785	99.8925
Dox	1	L-R_forelimb	0.5	0.15	0.19	0.34	2.94118	20.8323	61.2716
Dox	1	L-R_forelimb	0.580645	0.12	0.19	0.31	3.22581	23.0063	74.2138
Dox	1	L-R_forelimb	0.589744	0.18	0.21	0.39	2.5641	18.8147	48.2428
Dox	1	L-R_forelimb	0.560976	0.21	0.2	0.41	2.43902	15.5015	37.8086
Dox	1	L-R_forelimb	0.515152	0.15	0.18	0.33	3.0303	20.4689	62.0271
Dox	1	L-R_forelimb	0.548387	0.13	0.18	0.31	3.22581	18.7599	60.5157
Dox	1	L-R_forelimb	0.529412	0.15	0.19	0.34	2.94118	21.1103	62.0891
Dox	1	L-R_forelimb	0.5	0.11	0.17	0.28	3.57143	20.8146	74.3378
Dox	2	L-R_forelimb	0.5	0.15	0.15	0.3	3.33333	19.6854	65.618
Dox	2	L-R_forelimb	0.516129	0.15	0.16	0.31	3.22581	18.0417	58.199
Dox	2	L-R_forelimb	0.518519	0.12	0.15	0.27	3.7037	20.74	76.8148
Dox	2	L-R_forelimb	0.551724	0.12	0.17	0.29	3.44828	18.2675	62.9915
Dox	2	L-R_forelimb	0.551724	0.16	0.13	0.29	3.44828	12.6749	43.7064
Dox	2	L-R_forelimb	0.588235	0.15	0.19	0.34	2.94118	17.0411	50.1208
Dox	2	L-R_forelimb	0.513514	0.17	0.2	0.37	2.7027	18.8903	51.0549
Dox	2	L-R_forelimb	0.551724	0.13	0.16	0.29	3.44828	17.7054	61.0531
Dox	7	L-R_forelimb	0.514286	0.17	0.18	0.35	2.85714	19.3531	55.2945
Dox	7	L-R_forelimb	0.59375	0.17	0.15	0.32	3.125	14.945	46.7033
Dox	7	L-R_forelimb	0.586207	0.14	0.15	0.29	3.44828	16.1411	55.6591
Dox	7	L-R_forelimb	0.636364	0.16	0.17	0.33	3.0303	13.3903	40.5768
Dox	7	L-R_forelimb	0.540541	0.17	0.2	0.37	2.7027	18.555	50.1487
Dox	7	L-R_forelimb	0.516129	0.14	0.17	0.31	3.22581	17.3284	55.898
Dox	7	L-R_forelimb	0.555556	0.11	0.16	0.27	3.7037	19.7173	73.027
Dox	7	L-R_forelimb	0.565217	0.11	0.12	0.23	4.34783	14.612	63.5306
Dox	7	L-R_forelimb	0.6	0.09	0.16	0.25	4	23.1108	92.4431
Dox	7	L-R_forelimb	0.619048	0.09	0.12	0.21	4.7619	17.2316	82.0553
Dox	8	L-R_forelimb	0.551724	0.13	0.16	0.29	3.44828	20.5971	71.0246
Dox	8	L-R_forelimb	0.518519	0.14	0.13	0.27	3.7037	14.0484	52.0312
Dox	8	L-R_forelimb	0.541667	0.09	0.15	0.24	4.16667	21.6961	90.4003
Dox	8	L-R_forelimb	0.518519	0.12	0.15	0.27	3.7037	16.6372	61.6193
Dox	8	L-R_forelimb	0.529412	0.18	0.16	0.34	2.94118	17.9365	52.7546
Dox	8	L-R_forelimb	0.571429	0.11	0.17	0.28	3.57143	18.8231	67.2255
Dox	8	L-R_forelimb	0.576923	0.11	0.15	0.26	3.84615	18.7287	72.0336
Dox	8	L-R_forelimb	0.608696	0.1	0.13	0.23	4.34783	19.3298	84.0425
Dox	8	L-R_forelimb	0.583333	0.09	0.15	0.24	4.16667	18.3257	76.3572
Dox	9	L-R_forelimb	0.608696	0.09	0.14	0.23	4.34783	20.4412	88.8748
Dox	9	L-R_forelimb	0.521739	0.11	0.12	0.23	4.34783	15.2155	66.1544
Dox	9	L-R_forelimb	0.65	0.07	0.13	0.2	5	26.1142	130.571
Dox	9	L-R_forelimb	0.517241	0.12	0.17	0.29	3.44828	17.7595	61.2395
Dox	9	L-R_forelimb	0.583333	0.1	0.14	0.24	4.16667	24.2532	101.055
Dox	9	L-R_forelimb	0.617647	0.17	0.17	0.34	2.94118	19.1762	56.4007
Dox	9	L-R_forelimb	0.521739	0.1	0.13	0.23	4.34783	19.1935	83.4498
Dox	9	L-R_forelimb	0.541667	0.12	0.12	0.24	4.16667	15.2611	63.588
Dox	9	L-R_forelimb	0.65	0.07	0.13	0.2	5	21.52	107.6
Dox	9	L-R_forelimb	0.53125	0.12	0.2	0.32	3.125	17.1732	53.6661
Dox	10	L-R_forelimb	0.611111	0.06	0.12	0.18	5.55556	20.0033	111.13
Dox	10	L-R_forelimb	0.565217	0.08	0.15	0.23	4.34783	18.0673	78.5534
Dox	10	L-R_forelimb	0.636364	0.08	0.14	0.22	4.54545	19.3354	87.8882
Dox	10	L-R_forelimb	0.761905	0.1	0.11	0.21	4.7619	17.8539	85.0187
Dox	10	L-R_forelimb	0.526316	0.1	0.28	0.38	2.63158	14.8462	39.0691
Dox	10	L-R_forelimb	0.736842	0.06	0.13	0.19	5.26316	25.544	134.442
Dox	10	L-R_forelimb	0.75	0.06	0.1	0.16	6.25	21.1093	131.933
Dox	10	L-R_forelimb	0.708333	0.09	0.15	0.24	4.16667	26.1732	109.055
Dox	10	L-R_forelimb	0.866667	0.05	0.1	0.15	6.66667	22.0072	146.715
Dox	10	L-R_forelimb	0.652174	0.1	0.13	0.23	4.34783	18.272	79.4436
Dox	10	L-R_forelimb	0.655172	0.13	0.16	0.29	3.44828	15.2122	52.4559
Dox	12	L-R_forelimb	0.625	0.15	0.17	0.32	3.125	21.1225	66.0078
Dox	12	L-R_forelimb	0.555556	0.1	0.17	0.27	3.7037	20.8341	77.1633
Dox	12	L-R_forelimb	0.565217	0.1	0.13	0.23	4.34783	20.5238	89.234
Dox	12	L-R_forelimb	0.545455	0.08	0.14	0.22	4.54545	21.5393	97.9058
Dox	12	L-R_forelimb	0.590909	0.09	0.13	0.22	4.54545	17.9038	81.381
Dox	12	L-R_forelimb	0.56	0.08	0.17	0.25	4	23.4525	93.8099
Dox	12	L-R_forelimb	0.619048	0.07	0.14	0.21	4.7619	20.1103	95.7634
Dox	12	L-R_forelimb	0.5	0.07	0.15	0.22	4.54545	21.3825	97.1932
Dox	13	L-R_forelimb	0.555556	0.11	0.16	0.27	3.7037	22.5769	83.6182
Dox	13	L-R_forelimb	0.52	0.1	0.15	0.25	4	22.4437	89.7749
Dox	13	L-R_forelimb	0.588235	0.14	0.2	0.34	2.94118	20.3292	59.7917
Dox	13	L-R_forelimb	0.555556	0.11	0.16	0.27	3.7037	17.1225	63.4166
Dox	13	L-R_forelimb	0.566667	0.14	0.16	0.3	3.33333	20.9539	69.8464
Dox	13	L-R_forelimb	0.585366	0.22	0.19	0.41	2.43902	20.6087	50.2651
Dox	13	L-R_forelimb	0.52	0.08	0.17	0.25	4	22.4988	89.9952
Dox	13	L-R_forelimb	0.512821	0.19	0.2	0.39	2.5641	17.4037	44.6249
Dox	13	L-R_forelimb	0.568182	0.24	0.2	0.44	2.27273	17.3481	39.4275
Dox	13	L-R_forelimb	0.517241	0.1	0.19	0.29	3.44828	22.6401	78.0693
Dox	14	L-R_forelimb	0.571429	0.15	0.13	0.28	3.57143	16.4156	58.627
Dox	14	L-R_forelimb	0.516129	0.16	0.15	0.31	3.22581	17.8452	57.5653
Dox	14	L-R_forelimb	0.586207	0.13	0.16	0.29	3.44828	19.8154	68.3291
Dox	14	L-R_forelimb	0.517241	0.13	0.16	0.29	3.44828	17.2321	59.421
Dox	14	L-R_forelimb	0.575758	0.13	0.2	0.33	3.0303	19.7527	59.8567
Dox	14	L-R_forelimb	0.5	0.11	0.15	0.26	3.84615	18.3189	70.4572
Dox	14	L-R_forelimb	0.518519	0.12	0.15	0.27	3.7037	17.9757	66.5768
Dox	14	L-R_forelimb	0.535714	0.13	0.15	0.28	3.57143	17.7092	63.2473
Dox	14	L-R_forelimb	0.509804	0.29	0.22	0.51	1.96078	15.1454	29.6969
Dox	14	L-R_forelimb	0.564103	0.22	0.17	0.39	2.5641	16.2614	41.696
Dox	15	L-R_forelimb	0.551724	0.12	0.17	0.29	3.44828	20.6051	71.0521
Dox	15	L-R_forelimb	0.5	0.13	0.17	0.3	3.33333	14.4986	48.3286
Dox	15	L-R_forelimb	0.516129	0.12	0.19	0.31	3.22581	22.6091	72.9326
Dox	15	L-R_forelimb	0.548387	0.11	0.2	0.31	3.22581	20.2965	65.4724
Dox	15	L-R_forelimb	0.631579	0.07	0.12	0.19	5.26316	21.2365	111.771
Dox	15	L-R_forelimb	0.6	0.09	0.11	0.2	5	15.5032	77.516
Dox	15	L-R_forelimb	0.571429	0.08	0.2	0.28	3.57143	19.2363	68.701
Dox	15	L-R_forelimb	0.517241	0.11	0.18	0.29	3.44828	21.5257	74.2264
Dox	16	L-R_forelimb	0.515152	0.18	0.15	0.33	3.0303	17.7413	53.7614
Dox	16	L-R_forelimb	0.545455	0.17	0.16	0.33	3.0303	17.7414	53.7617
Dox	16	L-R_forelimb	0.5	0.13	0.13	0.26	3.84615	18.7589	72.1494
Dox	16	L-R_forelimb	0.5	0.14	0.16	0.3	3.33333	19.2952	64.3173
Dox	16	L-R_forelimb	0.518519	0.12	0.15	0.27	3.7037	19.1778	71.0288
Dox	16	L-R_forelimb	0.53125	0.14	0.18	0.32	3.125	20.9587	65.496
Dox	16	L-R_forelimb	0.5	0.1	0.14	0.24	4.16667	19.2348	80.145
Dox	16	L-R_forelimb	0.62069	0.12	0.17	0.29	3.44828	20.5059	70.71
Dox	16	L-R_forelimb	0.68	0.13	0.12	0.25	4	14.2113	56.8451
Dox	17	L-R_forelimb	0.5	0.13	0.17	0.3	3.33333	20.0701	66.9004
Dox	17	L-R_forelimb	0.558824	0.16	0.18	0.34	2.94118	14.8893	43.792
Dox	17	L-R_forelimb	0.53125	0.15	0.17	0.32	3.125	18.1495	56.7171
Dox	17	L-R_forelimb	0.514286	0.19	0.16	0.35	2.85714	17.1342	48.9548
Dox	17	L-R_forelimb	0.533333	0.12	0.18	0.3	3.33333	20.0032	66.6775
Dox	17	L-R_forelimb	0.518519	0.1	0.17	0.27	3.7037	21.6281	80.1042
Dox	17	L-R_forelimb	0.576923	0.09	0.17	0.26	3.84615	18.5986	71.5329
Dox	17	L-R_forelimb	0.514286	0.16	0.19	0.35	2.85714	16.1448	46.1279
Dox	17	L-R_forelimb	0.542857	0.16	0.19	0.35	2.85714	18.9353	54.1008
Dox	18	L-R_forelimb	0.518519	0.11	0.16	0.27	3.7037	19.7509	73.1513
Dox	18	L-R_forelimb	0.566667	0.14	0.16	0.3	3.33333	15.4576	51.5253
Dox	18	L-R_forelimb	0.55	0.08	0.12	0.2	5	20.4531	102.266
Dox	18	L-R_forelimb	0.535714	0.12	0.16	0.28	3.57143	18.7218	66.8636
Dox	18	L-R_forelimb	0.535714	0.14	0.14	0.28	3.57143	17.8897	63.8919
Dox	18	L-R_forelimb	0.575758	0.17	0.16	0.33	3.0303	18.8365	57.0803
Dox	18	L-R_forelimb	0.619048	0.08	0.13	0.21	4.7619	23.2574	110.75
Dox	18	L-R_forelimb	0.541667	0.1	0.14	0.24	4.16667	20.5536	85.64
Dox	18	L-R_forelimb	0.608696	0.09	0.14	0.23	4.34783	18.6051	80.8918
Dox	18	L-R_forelimb	0.586207	0.13	0.16	0.29	3.44828	14.9624	51.5944
Dox	1	L-R_forelimb	0.5	0.26	0.16	0.42	2.38095	16.6854	39.7271
Dox	1	L-R_forelimb	0.512821	0.21	0.18	0.39	2.5641	18.3981	47.1745
Dox	1	L-R_forelimb	0.517241	0.13	0.16	0.29	3.44828	21.7603	75.0354
Dox	1	L-R_forelimb	0.538462	0.21	0.18	0.39	2.5641	18.2606	46.8219
Dox	1	L-R_forelimb	0.5	0.18	0.14	0.32	3.125	18.8437	58.8866
Dox	1	L-R_forelimb	0.645161	0.13	0.18	0.31	3.22581	18.6706	60.2279
Dox	1	L-R_forelimb	0.52	0.25	0.25	0.5	2	17.9095	35.8191
Dox	1	L-R_forelimb	0.517241	0.14	0.15	0.29	3.44828	20.9724	72.3187
Dox	2	L-R_forelimb	0.533333	0.14	0.16	0.3	3.33333	21.5831	71.9438
Dox	2	L-R_forelimb	0.535714	0.13	0.15	0.28	3.57143	20.8356	74.4128
Dox	2	L-R_forelimb	0.590909	0.26	0.18	0.44	2.27273	15.4551	35.1252
Dox	2	L-R_forelimb	0.5	0.15	0.15	0.3	3.33333	18.8882	62.9606
Dox	2	L-R_forelimb	0.529412	0.18	0.16	0.34	2.94118	18.666	54.9001
Dox	2	L-R_forelimb	0.5	0.14	0.16	0.3	3.33333	18.2016	60.6719
Dox	2	L-R_forelimb	0.538462	0.13	0.13	0.26	3.84615	17.834	68.5923
Dox	2	L-R_forelimb	0.52	0.11	0.14	0.25	4	20.0914	80.3654
Dox	2	L-R_forelimb	0.538462	0.12	0.14	0.26	3.84615	14.8356	57.0601
Dox	7	L-R_forelimb	0.555556	0.16	0.2	0.36	2.77778	18.302	50.839
Dox	7	L-R_forelimb	0.555556	0.19	0.17	0.36	2.77778	14.5181	40.3281
Dox	7	L-R_forelimb	0.555556	0.12	0.15	0.27	3.7037	17.7254	65.6497
Dox	7	L-R_forelimb	0.53125	0.16	0.16	0.32	3.125	17.3321	54.1628
Dox	7	L-R_forelimb	0.518519	0.12	0.15	0.27	3.7037	21.2808	78.8179
Dox	7	L-R_forelimb	0.56	0.12	0.13	0.25	4	18.5332	74.1328
Dox	7	L-R_forelimb	0.535714	0.13	0.15	0.28	3.57143	18.9045	67.5161
Dox	7	L-R_forelimb	0.56	0.1	0.15	0.25	4	20.5717	82.2869
Dox	7	L-R_forelimb	0.590909	0.09	0.13	0.22	4.54545	20.2616	92.0983
Dox	7	L-R_forelimb	0.592593	0.12	0.15	0.27	3.7037	18.7202	69.3341
Dox	8	L-R_forelimb	0.535714	0.14	0.14	0.28	3.57143	19.3539	69.1209
Dox	8	L-R_forelimb	0.555556	0.14	0.13	0.27	3.7037	18.7287	69.3657
Dox	8	L-R_forelimb	0.52	0.1	0.15	0.25	4	21.5248	86.0991
Dox	8	L-R_forelimb	0.521739	0.1	0.13	0.23	4.34783	20.2658	88.112
Dox	8	L-R_forelimb	0.516129	0.14	0.17	0.31	3.22581	17.0596	55.0309
Dox	8	L-R_forelimb	0.52	0.12	0.13	0.25	4	18.6642	74.6568
Dox	8	L-R_forelimb	0.535714	0.12	0.16	0.28	3.57143	20.2654	72.3764
Dox	8	L-R_forelimb	0.5	0.11	0.13	0.24	4.16667	19.3192	80.4965
Dox	9	L-R_forelimb	0.521739	0.1	0.13	0.23	4.34783	18.5923	80.836
Dox	9	L-R_forelimb	0.521739	0.1	0.13	0.23	4.34783	15.6887	68.2119
Dox	9	L-R_forelimb	0.933333	0.05	0.1	0.15	6.66667	21.9558	146.372
Dox	9	L-R_forelimb	0.538462	0.11	0.15	0.26	3.84615	16.6065	63.871
Dox	9	L-R_forelimb	0.9375	0.06	0.1	0.16	6.25	18.502	115.637
Dox	9	L-R_forelimb	0.764706	0.07	0.1	0.17	5.88235	18.2656	107.445
Dox	9	L-R_forelimb	0.611111	0.19	0.17	0.36	2.77778	12.456	34.6
Dox	9	L-R_forelimb	0.617647	0.18	0.16	0.34	2.94118	13.4782	39.6417
Dox	9	L-R_forelimb	0.666667	0.08	0.13	0.21	4.7619	18.8667	89.8414
Dox	9	L-R_forelimb	0.6	0.08	0.12	0.2	5	17.4893	87.4467
Dox	10	L-R_forelimb	0.580645	0.17	0.14	0.31	3.22581	14.5936	47.0761
Dox	10	L-R_forelimb	0.575	0.25	0.15	0.4	2.5	14.505	36.2625
Dox	10	L-R_forelimb	0.607143	0.13	0.15	0.28	3.57143	22.3899	79.9639
Dox	10	L-R_forelimb	0.666667	0.07	0.11	0.18	5.55556	22.1099	122.833
Dox	10	L-R_forelimb	0.764706	0.06	0.11	0.17	5.88235	24.9858	146.975
Dox	10	L-R_forelimb	0.888889	0.06	0.12	0.18	5.55556	21.9925	122.181
Dox	10	L-R_forelimb	0.764706	0.07	0.1	0.17	5.88235	17.4419	102.599
Dox	10	L-R_forelimb	0.8	0.08	0.12	0.2	5	25.3393	126.697
Dox	10	L-R_forelimb	0.882353	0.05	0.12	0.17	5.88235	20.7809	122.241
Dox	12	L-R_forelimb	0.62963	0.12	0.15	0.27	3.7037	18.9898	70.3326
Dox	12	L-R_forelimb	0.526316	0.08	0.11	0.19	5.26316	19.8299	104.368
Dox	12	L-R_forelimb	0.692308	0.14	0.12	0.26	3.84615	15.5598	59.8456
Dox	12	L-R_forelimb	0.724138	0.14	0.15	0.29	3.44828	17.1253	59.0527
Dox	12	L-R_forelimb	0.52381	0.1	0.11	0.21	4.7619	17.861	85.0523
Dox	12	L-R_forelimb	0.52381	0.1	0.11	0.21	4.7619	16.9036	80.4934
Dox	12	L-R_forelimb	0.736842	0.07	0.12	0.19	5.26316	19.6031	103.174
Dox	12	L-R_forelimb	0.619048	0.08	0.13	0.21	4.7619	18.6462	88.7917
Dox	12	L-R_forelimb	0.807692	0.1	0.16	0.26	3.84615	21.0846	81.0944
Dox	12	L-R_forelimb	0.65	0.07	0.13	0.2	5	18.2095	91.0474
Dox	13	L-R_forelimb	0.533333	0.14	0.16	0.3	3.33333	18.025	60.0832
Dox	13	L-R_forelimb	0.515152	0.16	0.17	0.33	3.0303	18.5429	56.1906
Dox	13	L-R_forelimb	0.541667	0.11	0.13	0.24	4.16667	19.317	80.4874
Dox	13	L-R_forelimb	0.666667	0.12	0.12	0.24	4.16667	15.4418	64.3407
Dox	13	L-R_forelimb	0.666667	0.09	0.12	0.21	4.7619	19.7683	94.1349
Dox	13	L-R_forelimb	0.65	0.09	0.11	0.2	5	17.7476	88.7381
Dox	13	L-R_forelimb	0.772727	0.09	0.13	0.22	4.54545	17.127	77.8502
Dox	13	L-R_forelimb	0.782609	0.09	0.14	0.23	4.34783	15.891	69.0911
Dox	13	L-R_forelimb	0.740741	0.12	0.15	0.27	3.7037	15.957	59.1
Dox	13	L-R_forelimb	0.692308	0.11	0.15	0.26	3.84615	14.9673	57.5666
Dox	14	L-R_forelimb	0.56	0.12	0.13	0.25	4	20.1148	80.4593
Dox	14	L-R_forelimb	0.52	0.11	0.14	0.25	4	17.8818	71.5272
Dox	14	L-R_forelimb	0.541667	0.1	0.14	0.24	4.16667	21.408	89.1998
Dox	14	L-R_forelimb	0.541667	0.09	0.15	0.24	4.16667	21.1954	88.3141
Dox	14	L-R_forelimb	0.6	0.11	0.14	0.25	4	19.6335	78.534
Dox	14	L-R_forelimb	0.608696	0.1	0.13	0.23	4.34783	18.8826	82.0981
Dox	14	L-R_forelimb	0.666667	0.08	0.13	0.21	4.7619	22.2502	105.953
Dox	14	L-R_forelimb	0.521739	0.1	0.13	0.23	4.34783	18.4889	80.3865
Dox	14	L-R_forelimb	0.56	0.1	0.15	0.25	4	21.3521	85.4084
Dox	14	L-R_forelimb	0.631579	0.06	0.13	0.19	5.26316	22.9317	120.693
Dox	15	L-R_forelimb	0.538462	0.09	0.17	0.26	3.84615	22.2623	85.6243
Dox	15	L-R_forelimb	0.521739	0.09	0.14	0.23	4.34783	15.3925	66.9241
Dox	15	L-R_forelimb	0.6	0.07	0.13	0.2	5	22.4326	112.163
Dox	15	L-R_forelimb	0.888889	0.05	0.13	0.18	5.55556	24.7749	137.638
Dox	15	L-R_forelimb	0.8125	0.06	0.1	0.16	6.25	22.3254	139.534
Dox	15	L-R_forelimb	0.8	0.07	0.13	0.2	5	26.8448	134.224
Dox	15	L-R_forelimb	0.8	0.06	0.09	0.15	6.66667	20.0554	133.703
Dox	15	L-R_forelimb	0.866667	0.05	0.1	0.15	6.66667	20.8418	138.945
Dox	15	L-R_forelimb	0.666667	0.07	0.08	0.15	6.66667	15.4494	102.996
Dox	15	L-R_forelimb	0.545455	0.16	0.17	0.33	3.0303	19.6095	59.4228
Dox	16	L-R_forelimb	0.576923	0.11	0.15	0.26	3.84615	20.3084	78.1091
Dox	16	L-R_forelimb	0.541667	0.11	0.13	0.24	4.16667	17.0277	70.9489
Dox	16	L-R_forelimb	0.538462	0.12	0.14	0.26	3.84615	19.2105	73.8866
Dox	16	L-R_forelimb	0.571429	0.08	0.13	0.21	4.7619	20.7554	98.8355
Dox	16	L-R_forelimb	0.515152	0.15	0.18	0.33	3.0303	18.1132	54.8886
Dox	16	L-R_forelimb	0.586207	0.12	0.17	0.29	3.44828	17.9744	61.9807
Dox	16	L-R_forelimb	0.541667	0.12	0.14	0.26	3.84615	19.2105	73.8866
Dox	17	L-R_forelimb	0.535714	0.12	0.16	0.28	3.57143	21.7016	77.5058
Dox	17	L-R_forelimb	0.518519	0.12	0.15	0.27	3.7037	19.4382	71.9935
Dox	17	L-R_forelimb	0.611111	0.05	0.13	0.18	5.55556	22.5831	125.462
Dox	17	L-R_forelimb	0.551724	0.14	0.15	0.29	3.44828	17.7034	61.0463
Dox	17	L-R_forelimb	0.625	0.09	0.15	0.24	4.16667	22.4382	93.4927
Dox	17	L-R_forelimb	0.5	0.08	0.14	0.22	4.54545	21.1348	96.0673
Dox	17	L-R_forelimb	0.533333	0.13	0.17	0.3	3.33333	20.7392	69.1307
Dox	17	L-R_forelimb	0.548387	0.14	0.17	0.31	3.22581	20.0077	64.5411
Dox	17	L-R_forelimb	0.583333	0.08	0.16	0.24	4.16667	21.7405	90.5852
Dox	17	L-R_forelimb	0.545455	0.08	0.14	0.22	4.54545	21.2348	96.522
Dox	18	L-R_forelimb	0.555556	0.12	0.15	0.27	3.7037	19.6095	72.6278
Dox	18	L-R_forelimb	0.517241	0.13	0.16	0.29	3.44828	20.7334	71.4945
Dox	18	L-R_forelimb	0.583333	0.1	0.14	0.24	4.16667	23.323	97.1793
Dox	18	L-R_forelimb	0.705882	0.07	0.1	0.17	5.88235	18.382	108.13
Dox	18	L-R_forelimb	0.555556	0.1	0.17	0.27	3.7037	21.0165	77.8389
Dox	18	L-R_forelimb	0.631579	0.06	0.13	0.19	5.26316	22.6435	119.176
Dox	18	L-R_forelimb	0.578947	0.07	0.12	0.19	5.26316	19.8894	104.681
Dox	18	L-R_forelimb	0.833333	0.06	0.12	0.18	5.55556	21.7434	120.797
Dox	18	L-R_forelimb	0.5	0.08	0.14	0.22	4.54545	21.3489	97.0403

## Sheet: Hindlimb
Time_ID	Animal_ID	Limb_ID	transPhase	ref_r-HL_stanceTime(s)	ref_r-HL_swingTime(s)	ref_r-HL_strideTime(s)	ref_r-HL_strideFreq(Hz)	ref_r-HL_strideDist(cm)	ref_r-HL_instSpd(cm/s)
Con	1	L-R_hindlimbs	0.529412	0.18	0.16	0.34	2.94118	16.4915	48.5043
Con	1	L-R_hindlimbs	0.545455	0.19	0.14	0.33	3.0303	15.268	46.2667
Con	1	L-R_hindlimbs	0.5	0.18	0.16	0.34	2.94118	14.6892	43.2036
Con	1	L-R_hindlimbs	0.594595	0.23	0.14	0.37	2.7027	13.2406	35.7853
Con	1	L-R_hindlimbs	0.514286	0.19	0.16	0.35	2.85714	16.3027	46.5791
Con	1	L-R_hindlimbs	0.592593	0.14	0.13	0.27	3.7037	16.8585	62.4389
Con	1	L-R_hindlimbs	0.633333	0.15	0.15	0.3	3.33333	17.0487	56.8292
Con	1	L-R_hindlimbs	0.516129	0.15	0.16	0.31	3.22581	15.0116	48.4246
Con	1	L-R_hindlimbs	0.516129	0.16	0.15	0.31	3.22581	16.876	54.4388
Con	2	L-R_hindlimbs	0.516129	0.15	0.16	0.31	3.22581	15.5457	50.1474
Con	2	L-R_hindlimbs	0.514286	0.19	0.16	0.35	2.85714	15.549	44.4256
Con	2	L-R_hindlimbs	0.516129	0.16	0.15	0.31	3.22581	15.8471	51.1196
Con	2	L-R_hindlimbs	0.592593	0.12	0.15	0.27	3.7037	19.2319	71.2292
Con	2	L-R_hindlimbs	0.533333	0.14	0.16	0.3	3.33333	17.5858	58.6195
Con	2	L-R_hindlimbs	0.533333	0.15	0.15	0.3	3.33333	16.4998	54.9994
Con	2	L-R_hindlimbs	0.517241	0.12	0.17	0.29	3.44828	19.5695	67.4812
Con	2	L-R_hindlimbs	0.583333	0.11	0.13	0.24	4.16667	16.6755	69.4814
Con	2	L-R_hindlimbs	0.583333	0.11	0.13	0.24	4.16667	16.2345	67.6437
Con	2	L-R_hindlimbs	0.571429	0.14	0.14	0.28	3.57143	13.5396	48.3558
Con	7	L-R_hindlimbs	0.516129	0.18	0.13	0.31	3.22581	13.8314	44.6176
Con	7	L-R_hindlimbs	0.5625	0.15	0.17	0.32	3.125	17.1522	53.6007
Con	7	L-R_hindlimbs	0.695652	0.09	0.14	0.23	4.34783	16.1067	70.0293
Con	7	L-R_hindlimbs	0.56	0.11	0.14	0.25	4	15.8361	63.3445
Con	7	L-R_hindlimbs	0.666667	0.09	0.12	0.21	4.7619	19.9113	94.8155
Con	7	L-R_hindlimbs	0.68	0.13	0.12	0.25	4	15.1114	60.4458
Con	7	L-R_hindlimbs	0.5	0.1	0.12	0.22	4.54545	18.3532	83.4237
Con	8	L-R_hindlimbs	0.5	0.16	0.16	0.32	3.125	13.0229	40.6966
Con	8	L-R_hindlimbs	0.571429	0.18	0.17	0.35	2.85714	17.9705	51.3443
Con	8	L-R_hindlimbs	0.533333	0.14	0.16	0.3	3.33333	16.891	56.3033
Con	8	L-R_hindlimbs	0.53125	0.17	0.15	0.32	3.125	16.6292	51.9663
Con	8	L-R_hindlimbs	0.551724	0.14	0.15	0.29	3.44828	17.4586	60.2021
Con	9	L-R_hindlimbs	0.576923	0.13	0.13	0.26	3.84615	13.5694	52.1899
Con	9	L-R_hindlimbs	0.566667	0.15	0.15	0.3	3.33333	14.7193	49.0644
Con	9	L-R_hindlimbs	0.692308	0.12	0.14	0.26	3.84615	14.377	55.2961
Con	9	L-R_hindlimbs	0.5	0.15	0.15	0.3	3.33333	13.5352	45.1174
Con	9	L-R_hindlimbs	0.533333	0.18	0.12	0.3	3.33333	9.41574	31.3858
Con	9	L-R_hindlimbs	0.514286	0.19	0.16	0.35	2.85714	14.2638	40.7538
Con	9	L-R_hindlimbs	0.521739	0.11	0.12	0.23	4.34783	14.8333	64.4926
Con	9	L-R_hindlimbs	0.555556	0.14	0.13	0.27	3.7037	14.7216	54.5243
Con	10	L-R_hindlimbs	0.5	0.13	0.13	0.26	3.84615	15.3026	58.856
Con	10	L-R_hindlimbs	0.592593	0.13	0.14	0.27	3.7037	17.0092	62.9971
Con	10	L-R_hindlimbs	0.592593	0.12	0.15	0.27	3.7037	18.4884	68.4755
Con	10	L-R_hindlimbs	0.625	0.1	0.14	0.24	4.16667	19.0836	79.5149
Con	10	L-R_hindlimbs	0.5	0.11	0.13	0.24	4.16667	15.7668	65.695
Con	10	L-R_hindlimbs	0.521739	0.11	0.12	0.23	4.34783	17.1886	74.7332
Con	10	L-R_hindlimbs	0.583333	0.12	0.12	0.24	4.16667	18.7808	78.2534
Con	12	L-R_hindlimbs	0.545455	0.16	0.17	0.33	3.0303	15.0584	45.6314
Con	12	L-R_hindlimbs	0.551724	0.16	0.13	0.29	3.44828	17.0495	58.7913
Con	12	L-R_hindlimbs	0.533333	0.16	0.14	0.3	3.33333	15.9344	53.1145
Con	12	L-R_hindlimbs	0.548387	0.16	0.15	0.31	3.22581	15.9704	51.5175
Con	12	L-R_hindlimbs	0.5	0.1	0.16	0.26	3.84615	19.6156	75.4448
Con	12	L-R_hindlimbs	0.52	0.1	0.15	0.25	4	15.64	62.5601
Con	12	L-R_hindlimbs	0.545455	0.14	0.19	0.33	3.0303	17.2776	52.3564
Con	12	L-R_hindlimbs	0.5	0.1	0.12	0.22	4.54545	16.9001	76.8187
Con	12	L-R_hindlimbs	0.5	0.12	0.16	0.28	3.57143	14.7155	52.5553
Con	12	L-R_hindlimbs	0.517241	0.15	0.14	0.29	3.44828	14.714	50.738
Con	13	L-R_hindlimbs	0.548387	0.15	0.16	0.31	3.22581	18.3176	59.0892
Con	13	L-R_hindlimbs	0.558824	0.18	0.16	0.34	2.94118	17.8196	52.4107
Con	13	L-R_hindlimbs	0.571429	0.13	0.15	0.28	3.57143	18.2085	65.0304
Con	13	L-R_hindlimbs	0.5	0.12	0.16	0.28	3.57143	17.4133	62.1904
Con	13	L-R_hindlimbs	0.583333	0.1	0.14	0.24	4.16667	19.2871	80.3629
Con	13	L-R_hindlimbs	0.583333	0.09	0.15	0.24	4.16667	19.9103	82.9594
Con	13	L-R_hindlimbs	0.590909	0.08	0.14	0.22	4.54545	21.7308	98.7765
Con	13	L-R_hindlimbs	0.5	0.14	0.16	0.3	3.33333	18.5468	61.8225
Con	13	L-R_hindlimbs	0.538462	0.12	0.14	0.26	3.84615	18.23	70.1156
Con	13	L-R_hindlimbs	0.518519	0.12	0.15	0.27	3.7037	19.0033	70.3825
Con	14	L-R_hindlimbs	0.553191	0.27	0.2	0.47	2.12766	16.4646	35.031
Con	14	L-R_hindlimbs	0.530612	0.32	0.17	0.49	2.04082	14.2931	29.1697
Con	14	L-R_hindlimbs	0.551724	0.14	0.15	0.29	3.44828	18.2529	62.9411
Con	14	L-R_hindlimbs	0.555556	0.13	0.14	0.27	3.7037	16.7223	61.9343
Con	14	L-R_hindlimbs	0.521739	0.09	0.14	0.23	4.34783	21.8143	94.8447
Con	14	L-R_hindlimbs	0.5	0.08	0.12	0.2	5	19.1146	95.573
Con	14	L-R_hindlimbs	0.5	0.09	0.13	0.22	4.54545	21.3637	97.1079
Con	14	L-R_hindlimbs	0.517241	0.13	0.16	0.29	3.44828	16.5181	56.959
Con	14	L-R_hindlimbs	0.580645	0.14	0.17	0.31	3.22581	15.307	49.3774
Con	14	L-R_hindlimbs	0.5	0.08	0.12	0.2	5	19.0665	95.3326
Con	14	L-R_hindlimbs	0.541667	0.09	0.15	0.24	4.16667	21.298	88.7418
Con	14	L-R_hindlimbs	0.590909	0.09	0.13	0.22	4.54545	18.5973	84.5334
Con	15	L-R_hindlimbs	0.529412	0.18	0.16	0.34	2.94118	17.9774	52.8746
Con	15	L-R_hindlimbs	0.515152	0.17	0.16	0.33	3.0303	18.3685	55.6622
Con	15	L-R_hindlimbs	0.576923	0.12	0.14	0.26	3.84615	17.1431	65.935
Con	15	L-R_hindlimbs	0.5	0.12	0.14	0.26	3.84615	18.9505	72.8864
Con	15	L-R_hindlimbs	0.527778	0.16	0.2	0.36	2.77778	18.4455	51.2375
Con	15	L-R_hindlimbs	0.545455	0.1	0.12	0.22	4.54545	17.0104	77.3199
Con	15	L-R_hindlimbs	0.52	0.12	0.13	0.25	4	20.4189	81.6757
Con	15	L-R_hindlimbs	0.5	0.08	0.14	0.22	4.54545	20.2583	92.0833
Con	15	L-R_hindlimbs	0.52	0.11	0.14	0.25	4	18.154	72.6161
Con	15	L-R_hindlimbs	0.529412	0.19	0.15	0.34	2.94118	15.4439	45.4231
Con	15	L-R_hindlimbs	0.617647	0.23	0.11	0.34	2.94118	12.1132	35.6271
Con	16	L-R_hindlimbs	0.608696	0.09	0.14	0.23	4.34783	17.7872	77.3355
Con	16	L-R_hindlimbs	0.5	0.1	0.14	0.24	4.16667	18.4559	76.8997
Con	16	L-R_hindlimbs	0.517241	0.12	0.17	0.29	3.44828	18.773	64.7343
Con	16	L-R_hindlimbs	0.541667	0.1	0.14	0.24	4.16667	17.8612	74.4215
Con	16	L-R_hindlimbs	0.608696	0.08	0.15	0.23	4.34783	19.8184	86.167
Con	16	L-R_hindlimbs	0.633333	0.12	0.18	0.3	3.33333	16.2805	54.2683
Con	16	L-R_hindlimbs	0.607143	0.12	0.16	0.28	3.57143	16.4563	58.7726
Con	16	L-R_hindlimbs	0.514286	0.19	0.16	0.35	2.85714	11.7773	33.6494
Con	16	L-R_hindlimbs	0.560976	0.28	0.13	0.41	2.43902	11.4951	28.0369
Con	16	L-R_hindlimbs	0.5	0.15	0.17	0.32	3.125	18.0313	56.3478
Con	16	L-R_hindlimbs	0.652174	0.09	0.14	0.23	4.34783	16.5022	71.7487
Con	17	L-R_hindlimbs	0.552632	0.19	0.19	0.38	2.63158	15.7914	41.5563
Con	17	L-R_hindlimbs	0.5	0.15	0.25	0.4	2.5	16.8731	42.1827
Con	17	L-R_hindlimbs	0.551724	0.12	0.17	0.29	3.44828	18.1561	62.6072
Con	17	L-R_hindlimbs	0.551724	0.1	0.19	0.29	3.44828	20.4162	70.4005
Con	17	L-R_hindlimbs	0.517241	0.12	0.17	0.29	3.44828	18.783	64.7689
Con	17	L-R_hindlimbs	0.52	0.1	0.15	0.25	4	18.0456	72.1824
Con	17	L-R_hindlimbs	0.551724	0.1	0.19	0.29	3.44828	17.9991	62.066
Con	17	L-R_hindlimbs	0.5	0.18	0.16	0.34	2.94118	14.2357	41.8698
Con	18	L-R_hindlimbs	0.533333	0.14	0.16	0.3	3.33333	16.6318	55.4392
Con	18	L-R_hindlimbs	0.551724	0.14	0.15	0.29	3.44828	16.3313	56.3148
Con	18	L-R_hindlimbs	0.52	0.11	0.14	0.25	4	18.6558	74.6233
Con	18	L-R_hindlimbs	0.535714	0.1	0.18	0.28	3.57143	18.2081	65.0288
Con	18	L-R_hindlimbs	0.606061	0.16	0.17	0.33	3.0303	15.4423	46.7948
Con	18	L-R_hindlimbs	0.518519	0.11	0.16	0.27	3.7037	17.0551	63.1669
Con	18	L-R_hindlimbs	0.56	0.11	0.14	0.25	4	16.8552	67.4207
Con	18	L-R_hindlimbs	0.5	0.09	0.15	0.24	4.16667	17.6348	73.4785
Con	18	L-R_hindlimbs	0.5	0.13	0.17	0.3	3.33333	17.87	59.5668
Con	18	L-R_hindlimbs	0.5	0.09	0.15	0.24	4.16667	17.3589	72.3285
Con	18	L-R_hindlimbs	0.6	0.11	0.14	0.25	4	15.6462	62.5847
Con	18	L-R_hindlimbs	0.517241	0.15	0.14	0.29	3.44828	15.417	53.162
Con	1	L-R_hindlimbs	0.545455	0.16	0.17	0.33	3.0303	15.8145	47.9227
Con	1	L-R_hindlimbs	0.516129	0.15	0.16	0.31	3.22581	17.734	57.2064
Con	1	L-R_hindlimbs	0.527778	0.16	0.2	0.36	2.77778	15.8136	43.9268
Con	1	L-R_hindlimbs	0.535714	0.13	0.15	0.28	3.57143	19.302	68.9356
Con	1	L-R_hindlimbs	0.5	0.13	0.15	0.28	3.57143	21.3368	76.2027
Con	1	L-R_hindlimbs	0.533333	0.14	0.16	0.3	3.33333	19.134	63.7799
Con	2	L-R_hindlimbs	0.5	0.17	0.15	0.32	3.125	16.4033	51.2604
Con	2	L-R_hindlimbs	0.555556	0.17	0.19	0.36	2.77778	15.8762	44.1006
Con	2	L-R_hindlimbs	0.545455	0.18	0.15	0.33	3.0303	15.0128	45.4933
Con	2	L-R_hindlimbs	0.5	0.19	0.15	0.34	2.94118	18.7538	55.1582
Con	2	L-R_hindlimbs	0.5	0.14	0.14	0.28	3.57143	17.9018	63.9351
Con	2	L-R_hindlimbs	0.535714	0.14	0.14	0.28	3.57143	17.1603	61.2867
Con	2	L-R_hindlimbs	0.517241	0.15	0.14	0.29	3.44828	14.6027	50.3542
Con	7	L-R_hindlimbs	0.527778	0.18	0.18	0.36	2.77778	17.9803	49.9451
Con	7	L-R_hindlimbs	0.566667	0.15	0.15	0.3	3.33333	14.5724	48.5746
Con	7	L-R_hindlimbs	0.5	0.16	0.16	0.32	3.125	15.4094	48.1545
Con	7	L-R_hindlimbs	0.512195	0.25	0.16	0.41	2.43902	14.6755	35.7939
Con	7	L-R_hindlimbs	0.64	0.09	0.16	0.25	4	19.6422	78.569
Con	7	L-R_hindlimbs	0.5	0.12	0.14	0.26	3.84615	17.5416	67.4675
Con	7	L-R_hindlimbs	0.5	0.13	0.17	0.3	3.33333	20.0118	66.7059
Con	7	L-R_hindlimbs	0.5	0.11	0.15	0.26	3.84615	17.1388	65.9183
Con	7	L-R_hindlimbs	0.642857	0.12	0.16	0.28	3.57143	18.4874	66.0266
Con	7	L-R_hindlimbs	0.538462	0.13	0.13	0.26	3.84615	13.3345	51.2865
Con	7	L-R_hindlimbs	0.580645	0.14	0.17	0.31	3.22581	18.8236	60.7211
Con	7	L-R_hindlimbs	0.535714	0.11	0.17	0.28	3.57143	15.2341	54.4075
Con	8	L-R_hindlimbs	0.548387	0.14	0.17	0.31	3.22581	12.6428	40.7834
Con	8	L-R_hindlimbs	0.53125	0.16	0.16	0.32	3.125	16.1151	50.3598
Con	8	L-R_hindlimbs	0.583333	0.21	0.15	0.36	2.77778	13.2498	36.8051
Con	8	L-R_hindlimbs	0.575758	0.17	0.16	0.33	3.0303	15.6069	47.2936
Con	8	L-R_hindlimbs	0.5	0.19	0.17	0.36	2.77778	16.4149	45.5969
Con	8	L-R_hindlimbs	0.551724	0.15	0.14	0.29	3.44828	14.8938	51.3581
Con	8	L-R_hindlimbs	0.586207	0.16	0.13	0.29	3.44828	13.0852	45.1213
Con	8	L-R_hindlimbs	0.566667	0.15	0.15	0.3	3.33333	14.3993	47.9978
Con	9	L-R_hindlimbs	0.535714	0.13	0.15	0.28	3.57143	17.8142	63.6222
Con	9	L-R_hindlimbs	0.516129	0.15	0.16	0.31	3.22581	16.2948	52.5637
Con	9	L-R_hindlimbs	0.566667	0.15	0.15	0.3	3.33333	15.789	52.63
Con	9	L-R_hindlimbs	0.566667	0.15	0.15	0.3	3.33333	15.6202	52.0675
Con	9	L-R_hindlimbs	0.551724	0.16	0.13	0.29	3.44828	15.3415	52.9017
Con	9	L-R_hindlimbs	0.551724	0.14	0.15	0.29	3.44828	16.2389	55.9962
Con	9	L-R_hindlimbs	0.555556	0.13	0.14	0.27	3.7037	15.1155	55.9833
Con	10	L-R_hindlimbs	0.538462	0.11	0.15	0.26	3.84615	19.1829	73.7804
Con	10	L-R_hindlimbs	0.625	0.11	0.13	0.24	4.16667	18.3037	76.2655
Con	10	L-R_hindlimbs	0.538462	0.1	0.16	0.26	3.84615	21.1228	81.2416
Con	10	L-R_hindlimbs	0.545455	0.09	0.13	0.22	4.54545	18.5619	84.3723
Con	10	L-R_hindlimbs	0.538462	0.12	0.14	0.26	3.84615	19.9007	76.5411
Con	10	L-R_hindlimbs	0.625	0.1	0.14	0.24	4.16667	17.0696	71.1233
Con	10	L-R_hindlimbs	0.5	0.12	0.14	0.26	3.84615	16.1551	62.1351
Con	10	L-R_hindlimbs	0.518519	0.12	0.15	0.27	3.7037	18.8965	69.9871
Con	10	L-R_hindlimbs	0.518519	0.11	0.16	0.27	3.7037	20.3894	75.5163
Con	10	L-R_hindlimbs	0.56	0.11	0.14	0.25	4	18.3342	73.3367
Con	10	L-R_hindlimbs	0.545455	0.09	0.13	0.22	4.54545	18.8914	85.87
Con	10	L-R_hindlimbs	0.590909	0.09	0.13	0.22	4.54545	18.056	82.0729
Con	12	L-R_hindlimbs	0.592593	0.13	0.14	0.27	3.7037	18.1546	67.2391
Con	12	L-R_hindlimbs	0.548387	0.13	0.18	0.31	3.22581	20.822	67.1676
Con	12	L-R_hindlimbs	0.5	0.08	0.14	0.22	4.54545	21.6662	98.4825
Con	12	L-R_hindlimbs	0.5	0.09	0.15	0.24	4.16667	19.464	81.1001
Con	12	L-R_hindlimbs	0.565217	0.07	0.16	0.23	4.34783	18.9288	82.2992
Con	12	L-R_hindlimbs	0.521739	0.08	0.15	0.23	4.34783	17.7894	77.3451
Con	12	L-R_hindlimbs	0.517241	0.11	0.18	0.29	3.44828	15.5883	53.7527
Con	12	L-R_hindlimbs	0.516129	0.14	0.17	0.31	3.22581	14.6381	47.2196
Con	12	L-R_hindlimbs	0.514286	0.16	0.19	0.35	2.85714	14.635	41.8142
Con	12	L-R_hindlimbs	0.576923	0.09	0.17	0.26	3.84615	21.7897	83.8066
Con	13	L-R_hindlimbs	0.545455	0.17	0.16	0.33	3.0303	19.2728	58.4025
Con	13	L-R_hindlimbs	0.512821	0.2	0.19	0.39	2.5641	18.6176	47.7375
Con	13	L-R_hindlimbs	0.535714	0.11	0.17	0.28	3.57143	20.0523	71.6153
Con	13	L-R_hindlimbs	0.555556	0.09	0.18	0.27	3.7037	16.4836	61.0504
Con	13	L-R_hindlimbs	0.566667	0.14	0.16	0.3	3.33333	21.0429	70.1431
Con	13	L-R_hindlimbs	0.652174	0.1	0.13	0.23	4.34783	20.626	89.6783
Con	13	L-R_hindlimbs	0.571429	0.11	0.17	0.28	3.57143	18.4456	65.8773
Con	13	L-R_hindlimbs	0.645161	0.11	0.2	0.31	3.22581	17.503	56.4611
Con	13	L-R_hindlimbs	0.566667	0.12	0.18	0.3	3.33333	18.7047	62.3489
Con	13	L-R_hindlimbs	0.571429	0.19	0.16	0.35	2.85714	17.0118	48.6052
Con	14	L-R_hindlimbs	0.53125	0.16	0.16	0.32	3.125	18.2625	57.0704
Con	14	L-R_hindlimbs	0.566667	0.13	0.17	0.3	3.33333	19.6287	65.4291
Con	14	L-R_hindlimbs	0.551724	0.11	0.18	0.29	3.44828	19.6245	67.6707
Con	14	L-R_hindlimbs	0.518519	0.11	0.16	0.27	3.7037	19.6927	72.9361
Con	14	L-R_hindlimbs	0.62069	0.18	0.11	0.29	3.44828	16.9251	58.3622
Con	14	L-R_hindlimbs	0.64	0.12	0.13	0.25	4	20.9885	83.9541
Con	14	L-R_hindlimbs	0.592593	0.11	0.16	0.27	3.7037	19.3262	71.5784
Con	14	L-R_hindlimbs	0.52	0.09	0.16	0.25	4	20.8628	83.4512
Con	14	L-R_hindlimbs	0.653846	0.11	0.15	0.26	3.84615	22.5993	86.9204
Con	15	L-R_hindlimbs	0.515152	0.18	0.15	0.33	3.0303	16.4871	49.9608
Con	15	L-R_hindlimbs	0.527778	0.19	0.17	0.36	2.77778	19.2523	53.4787
Con	15	L-R_hindlimbs	0.580645	0.14	0.17	0.31	3.22581	19.6073	63.2493
Con	15	L-R_hindlimbs	0.578947	0.2	0.18	0.38	2.63158	14.3789	37.8393
Con	15	L-R_hindlimbs	0.541667	0.11	0.13	0.24	4.16667	16.7439	69.7665
Con	15	L-R_hindlimbs	0.545455	0.08	0.14	0.22	4.54545	21.3951	97.2505
Con	15	L-R_hindlimbs	0.652174	0.09	0.14	0.23	4.34783	20.8269	90.5515
Con	15	L-R_hindlimbs	0.517241	0.13	0.16	0.29	3.44828	17.6179	60.7514
Con	15	L-R_hindlimbs	0.607143	0.12	0.16	0.28	3.57143	18.2212	65.0758
Con	16	L-R_hindlimbs	0.535714	0.12	0.16	0.28	3.57143	18.0836	64.5844
Con	16	L-R_hindlimbs	0.586207	0.13	0.16	0.29	3.44828	19.777	68.1964
Con	16	L-R_hindlimbs	0.52	0.12	0.13	0.25	4	17.0872	68.3487
Con	16	L-R_hindlimbs	0.52	0.1	0.15	0.25	4	21.2499	84.9998
Con	16	L-R_hindlimbs	0.62963	0.11	0.16	0.27	3.7037	21.594	79.9777
Con	16	L-R_hindlimbs	0.642857	0.11	0.17	0.28	3.57143	15.2968	54.6313
Con	16	L-R_hindlimbs	0.535714	0.15	0.13	0.28	3.57143	20.1153	71.8404
Con	16	L-R_hindlimbs	0.533333	0.12	0.18	0.3	3.33333	12.9812	43.2707
Con	16	L-R_hindlimbs	0.666667	0.24	0.12	0.36	2.77778	13.7015	38.0596
Con	17	L-R_hindlimbs	0.5625	0.17	0.15	0.32	3.125	17.6119	55.0373
Con	17	L-R_hindlimbs	0.628571	0.22	0.13	0.35	2.85714	17.1931	49.123
Con	17	L-R_hindlimbs	0.516129	0.13	0.18	0.31	3.22581	15.803	50.9773
Con	17	L-R_hindlimbs	0.558824	0.15	0.19	0.34	2.94118	16.519	48.5853
Con	17	L-R_hindlimbs	0.542857	0.18	0.17	0.35	2.85714	17.7549	50.7283
Con	17	L-R_hindlimbs	0.516129	0.12	0.19	0.31	3.22581	20.0048	64.5316
Con	17	L-R_hindlimbs	0.513514	0.19	0.18	0.37	2.7027	11.2937	30.5235
Con	17	L-R_hindlimbs	0.535714	0.1	0.18	0.28	3.57143	20.1149	71.8388
Con	17	L-R_hindlimbs	0.5625	0.19	0.13	0.32	3.125	12.4744	38.9826
Con	17	L-R_hindlimbs	0.53125	0.15	0.17	0.32	3.125	15.2367	47.6148
Con	17	L-R_hindlimbs	0.5625	0.24	0.24	0.48	2.08333	11.3519	23.6498
Con	18	L-R_hindlimbs	0.545455	0.18	0.15	0.33	3.0303	16.1439	48.921
Con	18	L-R_hindlimbs	0.5625	0.16	0.16	0.32	3.125	16.5547	51.7334
Con	18	L-R_hindlimbs	0.565217	0.1	0.13	0.23	4.34783	17.7602	77.2183
Con	18	L-R_hindlimbs	0.535714	0.12	0.16	0.28	3.57143	17.3014	61.7909
Con	18	L-R_hindlimbs	0.542857	0.14	0.21	0.35	2.85714	16.2738	46.4965
Con	18	L-R_hindlimbs	0.5	0.08	0.14	0.22	4.54545	19.8659	90.2994
Con	18	L-R_hindlimbs	0.541667	0.1	0.14	0.24	4.16667	18.4975	77.073
Con	18	L-R_hindlimbs	0.555556	0.15	0.12	0.27	3.7037	15.2885	56.6241
Con	18	L-R_hindlimbs	0.545455	0.1	0.12	0.22	4.54545	15.8068	71.8489
Con	18	L-R_hindlimbs	0.521739	0.07	0.16	0.23	4.34783	21.2991	92.6048
Con	1	L-R_hindlimbs	0.529412	0.15	0.19	0.34	2.94118	21.7909	64.0909
Con	1	L-R_hindlimbs	0.5	0.18	0.18	0.36	2.77778	20.2245	56.1792
Con	1	L-R_hindlimbs	0.516129	0.14	0.17	0.31	3.22581	20.8924	67.3947
Con	1	L-R_hindlimbs	0.535714	0.11	0.17	0.28	3.57143	21.1181	75.422
Con	1	L-R_hindlimbs	0.53125	0.15	0.17	0.32	3.125	19.6077	61.274
Con	1	L-R_hindlimbs	0.513514	0.15	0.22	0.37	2.7027	20.8505	56.3528
Con	1	L-R_hindlimbs	0.529412	0.13	0.21	0.34	2.94118	23.1067	67.961
Con	1	L-R_hindlimbs	0.5	0.24	0.22	0.46	2.17391	21.2441	46.1828
Con	1	L-R_hindlimbs	0.512195	0.21	0.2	0.41	2.43902	17.61	42.9512
Con	1	L-R_hindlimbs	0.548387	0.13	0.18	0.31	3.22581	21.4232	69.107
Con	1	L-R_hindlimbs	0.53125	0.14	0.18	0.32	3.125	19.0398	59.4993
Con	2	L-R_hindlimbs	0.538462	0.12	0.14	0.26	3.84615	20.5425	79.0096
Con	2	L-R_hindlimbs	0.5	0.1	0.18	0.28	3.57143	24.0886	86.0307
Con	2	L-R_hindlimbs	0.5	0.08	0.14	0.22	4.54545	25.697	116.805
Con	2	L-R_hindlimbs	0.529412	0.14	0.2	0.34	2.94118	21.1998	62.3524
Con	2	L-R_hindlimbs	0.5	0.16	0.2	0.36	2.77778	16.9896	47.1934
Con	2	L-R_hindlimbs	0.533333	0.15	0.15	0.3	3.33333	20.9985	69.9949
Con	2	L-R_hindlimbs	0.5	0.11	0.17	0.28	3.57143	20.4844	73.1586
Con	2	L-R_hindlimbs	0.607143	0.14	0.14	0.28	3.57143	13.6813	48.862
Con	7	L-R_hindlimbs	0.515152	0.15	0.18	0.33	3.0303	19.8459	60.139
Con	7	L-R_hindlimbs	0.512821	0.16	0.23	0.39	2.5641	18.4401	47.2822
Con	7	L-R_hindlimbs	0.615385	0.27	0.25	0.52	1.92308	13.046	25.0885
Con	7	L-R_hindlimbs	0.622642	0.37	0.16	0.53	1.88679	11.6383	21.959
Con	7	L-R_hindlimbs	0.510638	0.26	0.21	0.47	2.12766	14.6195	31.1054
Con	7	L-R_hindlimbs	0.514286	0.19	0.16	0.35	2.85714	17.8419	50.9769
Con	7	L-R_hindlimbs	0.612903	0.14	0.17	0.31	3.22581	19.4213	62.6495
Con	7	L-R_hindlimbs	0.516129	0.14	0.17	0.31	3.22581	19.1721	61.8456
Con	7	L-R_hindlimbs	0.564103	0.19	0.2	0.39	2.5641	14.0198	35.9483
Con	7	L-R_hindlimbs	0.534884	0.26	0.17	0.43	2.32558	11.6698	27.1391
Con	7	L-R_hindlimbs	0.666667	0.1	0.17	0.27	3.7037	17.7989	65.922
Con	8	L-R_hindlimbs	0.533333	0.12	0.18	0.3	3.33333	20.0888	66.9627
Con	8	L-R_hindlimbs	0.527778	0.19	0.17	0.36	2.77778	14.8265	41.1848
Con	8	L-R_hindlimbs	0.517241	0.12	0.17	0.29	3.44828	21.2596	73.309
Con	8	L-R_hindlimbs	0.575758	0.13	0.2	0.33	3.0303	19.3812	58.7309
Con	8	L-R_hindlimbs	0.548387	0.12	0.19	0.31	3.22581	17.8122	57.4588
Con	8	L-R_hindlimbs	0.536585	0.23	0.18	0.41	2.43902	13.2769	32.3826
Con	8	L-R_hindlimbs	0.552632	0.22	0.16	0.38	2.63158	16.5897	43.6572
Con	8	L-R_hindlimbs	0.5	0.16	0.16	0.32	3.125	14.9059	46.581
Con	8	L-R_hindlimbs	0.5	0.09	0.15	0.24	4.16667	23.3656	97.3567
Con	9	L-R_hindlimbs	0.545455	0.08	0.14	0.22	4.54545	22.546	102.482
Con	9	L-R_hindlimbs	0.521739	0.09	0.14	0.23	4.34783	23.235	101.022
Con	9	L-R_hindlimbs	0.5625	0.19	0.13	0.32	3.125	15.7852	49.3287
Con	9	L-R_hindlimbs	0.62069	0.15	0.14	0.29	3.44828	18.7133	64.5286
Con	9	L-R_hindlimbs	0.529412	0.16	0.18	0.34	2.94118	16.6636	49.0107
Con	9	L-R_hindlimbs	0.6	0.1	0.15	0.25	4	19.2885	77.1541
Con	9	L-R_hindlimbs	0.517241	0.13	0.16	0.29	3.44828	16.1396	55.6539
Con	9	L-R_hindlimbs	0.518519	0.14	0.13	0.27	3.7037	17.9571	66.5078
Con	9	L-R_hindlimbs	0.542857	0.15	0.2	0.35	2.85714	18.777	53.6487
Con	10	L-R_hindlimbs	0.517241	0.12	0.17	0.29	3.44828	21.7911	75.1416
Con	10	L-R_hindlimbs	0.541667	0.09	0.15	0.24	4.16667	21.2148	88.3952
Con	10	L-R_hindlimbs	0.533333	0.11	0.19	0.3	3.33333	20.0487	66.8289
Con	10	L-R_hindlimbs	0.53125	0.17	0.15	0.32	3.125	15.8373	49.4917
Con	10	L-R_hindlimbs	0.538462	0.23	0.16	0.39	2.5641	16.6317	42.6454
Con	10	L-R_hindlimbs	0.571429	0.21	0.14	0.35	2.85714	11.9755	34.2156
Con	10	L-R_hindlimbs	0.583333	0.21	0.15	0.36	2.77778	19.8801	55.2224
Con	10	L-R_hindlimbs	0.636364	0.09	0.13	0.22	4.54545	18.5893	84.4967
Con	10	L-R_hindlimbs	0.541667	0.09	0.15	0.24	4.16667	21.8671	91.1131
Con	10	L-R_hindlimbs	0.56	0.09	0.16	0.25	4	20.2288	80.915
Con	12	L-R_hindlimbs	0.538462	0.09	0.17	0.26	3.84615	25.159	96.7654
Con	12	L-R_hindlimbs	0.695652	0.1	0.13	0.23	4.34783	21.1296	91.868
Con	12	L-R_hindlimbs	0.653846	0.11	0.15	0.26	3.84615	23.1649	89.0958
Con	12	L-R_hindlimbs	0.566667	0.12	0.18	0.3	3.33333	21.9241	73.0803
Con	12	L-R_hindlimbs	0.512195	0.23	0.18	0.41	2.43902	16.2487	39.6311
Con	12	L-R_hindlimbs	0.516129	0.15	0.16	0.31	3.22581	19.7883	63.8332
Con	12	L-R_hindlimbs	0.575758	0.11	0.22	0.33	3.0303	21.053	63.7971
Con	12	L-R_hindlimbs	0.533333	0.15	0.15	0.3	3.33333	17.3458	57.8194
Con	12	L-R_hindlimbs	0.576923	0.11	0.15	0.26	3.84615	17.0658	65.6376
Con	13	L-R_hindlimbs	0.586207	0.13	0.16	0.29	3.44828	17.449	60.169
Con	13	L-R_hindlimbs	0.516129	0.13	0.18	0.31	3.22581	20.5037	66.1411
Con	13	L-R_hindlimbs	0.592593	0.12	0.15	0.27	3.7037	18.7228	69.3436
Con	13	L-R_hindlimbs	0.533333	0.13	0.17	0.3	3.33333	19.9595	66.5318
Con	13	L-R_hindlimbs	0.521739	0.1	0.13	0.23	4.34783	19.3971	84.3353
Con	13	L-R_hindlimbs	0.541667	0.09	0.15	0.24	4.16667	21.685	90.3543
Con	13	L-R_hindlimbs	0.53125	0.21	0.11	0.32	3.125	13.4692	42.0911
Con	13	L-R_hindlimbs	0.518519	0.11	0.16	0.27	3.7037	20.0663	74.3198
Con	14	L-R_hindlimbs	0.5	0.11	0.15	0.26	3.84615	17.7233	68.1666
Con	14	L-R_hindlimbs	0.586207	0.13	0.16	0.29	3.44828	19.2444	66.3599
Con	14	L-R_hindlimbs	0.625	0.11	0.13	0.24	4.16667	21.1348	88.0617
Con	14	L-R_hindlimbs	0.583333	0.1	0.14	0.24	4.16667	21.6279	90.1163
Con	14	L-R_hindlimbs	0.578947	0.21	0.17	0.38	2.63158	15.0328	39.5601
Con	14	L-R_hindlimbs	0.564103	0.22	0.17	0.39	2.5641	16.001	41.0283
Con	14	L-R_hindlimbs	0.5	0.1	0.14	0.24	4.16667	18.8588	78.5781
Con	14	L-R_hindlimbs	0.586207	0.13	0.16	0.29	3.44828	19.2336	66.3229
Con	15	L-R_hindlimbs	0.5	0.09	0.15	0.24	4.16667	20.8312	86.7967
Con	15	L-R_hindlimbs	0.583333	0.08	0.16	0.24	4.16667	23.2715	96.9644
Con	15	L-R_hindlimbs	0.555556	0.19	0.17	0.36	2.77778	16.1672	44.9088
Con	15	L-R_hindlimbs	0.536585	0.22	0.19	0.41	2.43902	18.3328	44.7142
Con	15	L-R_hindlimbs	0.55	0.22	0.18	0.4	2.5	15.5681	38.9203
Con	15	L-R_hindlimbs	0.548387	0.13	0.18	0.31	3.22581	19.5109	62.9385
Con	15	L-R_hindlimbs	0.68	0.1	0.15	0.25	4	20.6043	82.4174
Con	15	L-R_hindlimbs	0.666667	0.09	0.15	0.24	4.16667	20.9962	87.4841
Con	16	L-R_hindlimbs	0.533333	0.13	0.17	0.3	3.33333	19.6748	65.5825
Con	16	L-R_hindlimbs	0.580645	0.14	0.17	0.31	3.22581	15.2745	49.2727
Con	16	L-R_hindlimbs	0.5	0.18	0.16	0.34	2.94118	15.5411	45.7093
Con	16	L-R_hindlimbs	0.608696	0.1	0.13	0.23	4.34783	19.5724	85.0972
Con	16	L-R_hindlimbs	0.547619	0.24	0.18	0.42	2.38095	15.3009	36.4308
Con	16	L-R_hindlimbs	0.545455	0.16	0.17	0.33	3.0303	18.7227	56.7355
Con	16	L-R_hindlimbs	0.533333	0.12	0.18	0.3	3.33333	20.736	69.1199
Con	16	L-R_hindlimbs	0.607143	0.14	0.14	0.28	3.57143	17.4999	62.4997
Con	16	L-R_hindlimbs	0.535714	0.13	0.15	0.28	3.57143	14.0284	50.1013
Con	16	L-R_hindlimbs	0.529412	0.17	0.17	0.34	2.94118	16.8909	49.6792
Con	17	L-R_hindlimbs	0.518519	0.1	0.17	0.27	3.7037	19.2308	71.2251
Con	17	L-R_hindlimbs	0.5	0.09	0.17	0.26	3.84615	20.5678	79.1071
Con	17	L-R_hindlimbs	0.633333	0.13	0.17	0.3	3.33333	19.3545	64.5148
Con	17	L-R_hindlimbs	0.5625	0.13	0.19	0.32	3.125	18.2209	56.9403
Con	17	L-R_hindlimbs	0.636364	0.28	0.16	0.44	2.27273	16.9913	38.6166
Con	17	L-R_hindlimbs	0.571429	0.17	0.18	0.35	2.85714	18.4273	52.6494
Con	17	L-R_hindlimbs	0.535714	0.11	0.17	0.28	3.57143	18.6682	66.672
Con	17	L-R_hindlimbs	0.52	0.09	0.16	0.25	4	18.4458	73.7831
Con	17	L-R_hindlimbs	0.545455	0.14	0.19	0.33	3.0303	15.6609	47.4574
Con	17	L-R_hindlimbs	0.636364	0.17	0.16	0.33	3.0303	15.9572	48.3553
Con	18	L-R_hindlimbs	0.518519	0.13	0.14	0.27	3.7037	15.5707	57.6694
Con	18	L-R_hindlimbs	0.548387	0.12	0.19	0.31	3.22581	14.2408	45.9379
Con	18	L-R_hindlimbs	0.652174	0.11	0.12	0.23	4.34783	17.0221	74.0091
Con	18	L-R_hindlimbs	0.533333	0.13	0.17	0.3	3.33333	17.7679	59.2265
Con	18	L-R_hindlimbs	0.580645	0.18	0.13	0.31	3.22581	14.4751	46.6938
Con	18	L-R_hindlimbs	0.571429	0.09	0.12	0.21	4.7619	18.616	88.6475
Con	18	L-R_hindlimbs	0.517241	0.15	0.14	0.29	3.44828	16.2965	56.1949
Con	18	L-R_hindlimbs	0.571429	0.08	0.13	0.21	4.7619	19.7453	94.0252
Con	18	L-R_hindlimbs	0.590909	0.08	0.14	0.22	4.54545	21.1656	96.2073
Con	1	L-R_hindlimbs	0.527778	0.18	0.18	0.36	2.77778	20.4484	56.8012
Con	1	L-R_hindlimbs	0.5	0.16	0.18	0.34	2.94118	20.9549	61.6321
Con	1	L-R_hindlimbs	0.516129	0.13	0.18	0.31	3.22581	19.611	63.2611
Con	1	L-R_hindlimbs	0.535714	0.1	0.18	0.28	3.57143	22.8741	81.6931
Con	1	L-R_hindlimbs	0.5	0.15	0.19	0.34	2.94118	21.5759	63.4585
Con	1	L-R_hindlimbs	0.5	0.17	0.17	0.34	2.94118	17.9767	52.8728
Con	1	L-R_hindlimbs	0.5	0.17	0.19	0.36	2.77778	17.7843	49.4008
Con	1	L-R_hindlimbs	0.53125	0.15	0.17	0.32	3.125	18.8316	58.8486
Con	1	L-R_hindlimbs	0.5	0.12	0.18	0.3	3.33333	22.5304	75.1012
Con	2	L-R_hindlimbs	0.576923	0.12	0.14	0.26	3.84615	21.1257	81.2528
Con	2	L-R_hindlimbs	0.5	0.12	0.18	0.3	3.33333	21.9817	73.2724
Con	2	L-R_hindlimbs	0.52	0.1	0.15	0.25	4	20.1472	80.5887
Con	2	L-R_hindlimbs	0.513514	0.21	0.16	0.37	2.7027	14.0277	37.9127
Con	2	L-R_hindlimbs	0.5	0.25	0.19	0.44	2.27273	17.6292	40.0663
Con	2	L-R_hindlimbs	0.512821	0.2	0.19	0.39	2.5641	18.962	48.6205
Con	2	L-R_hindlimbs	0.533333	0.16	0.14	0.3	3.33333	16.3309	54.4362
Con	2	L-R_hindlimbs	0.545455	0.16	0.17	0.33	3.0303	20.5527	62.2808
Con	2	L-R_hindlimbs	0.545455	0.15	0.18	0.33	3.0303	15.6409	47.3966
Con	2	L-R_hindlimbs	0.542857	0.2	0.15	0.35	2.85714	14.5386	41.5389
Con	7	L-R_hindlimbs	0.514286	0.2	0.15	0.35	2.85714	16.7437	47.8392
Con	7	L-R_hindlimbs	0.527778	0.17	0.19	0.36	2.77778	19.9529	55.4246
Con	7	L-R_hindlimbs	0.53125	0.16	0.16	0.32	3.125	17.6445	55.1392
Con	7	L-R_hindlimbs	0.518519	0.11	0.16	0.27	3.7037	17.3775	64.3612
Con	7	L-R_hindlimbs	0.5	0.21	0.17	0.38	2.63158	15.1217	39.7939
Con	7	L-R_hindlimbs	0.519231	0.34	0.18	0.52	1.92308	14.0022	26.9273
Con	7	L-R_hindlimbs	0.518519	0.11	0.16	0.27	3.7037	20.0079	74.1035
Con	7	L-R_hindlimbs	0.566667	0.13	0.17	0.3	3.33333	19.0473	63.4909
Con	8	L-R_hindlimbs	0.551724	0.15	0.14	0.29	3.44828	16.535	57.0174
Con	8	L-R_hindlimbs	0.53125	0.14	0.18	0.32	3.125	22.4694	70.2168
Con	8	L-R_hindlimbs	0.681818	0.09	0.13	0.22	4.54545	18.5507	84.3212
Con	8	L-R_hindlimbs	0.6	0.1	0.15	0.25	4	18.3806	73.5222
Con	8	L-R_hindlimbs	0.6	0.15	0.15	0.3	3.33333	16.3153	54.3844
Con	8	L-R_hindlimbs	0.6	0.1	0.15	0.25	4	20.6314	82.5256
Con	8	L-R_hindlimbs	0.541667	0.09	0.15	0.24	4.16667	19.9237	83.0153
Con	8	L-R_hindlimbs	0.5	0.15	0.17	0.32	3.125	15.3916	48.0988
Con	9	L-R_hindlimbs	0.555556	0.12	0.15	0.27	3.7037	20.9437	77.5691
Con	9	L-R_hindlimbs	0.538462	0.11	0.15	0.26	3.84615	21.5323	82.8167
Con	9	L-R_hindlimbs	0.55	0.07	0.13	0.2	5	21.7986	108.993
Con	9	L-R_hindlimbs	0.52381	0.07	0.14	0.21	4.7619	22.641	107.814
Con	9	L-R_hindlimbs	0.681818	0.07	0.15	0.22	4.54545	25.0313	113.779
Con	9	L-R_hindlimbs	0.540541	0.22	0.15	0.37	2.7027	15.1778	41.021
Con	9	L-R_hindlimbs	0.5	0.13	0.11	0.24	4.16667	13.0119	54.2162
Con	10	L-R_hindlimbs	0.583333	0.09	0.15	0.24	4.16667	22.7277	94.6986
Con	10	L-R_hindlimbs	0.636364	0.09	0.13	0.22	4.54545	18.7243	85.1106
Con	10	L-R_hindlimbs	0.565217	0.09	0.14	0.23	4.34783	21.6966	94.333
Con	10	L-R_hindlimbs	0.555556	0.2	0.16	0.36	2.77778	18.8919	52.4776
Con	12	L-R_hindlimbs	0.555556	0.12	0.15	0.27	3.7037	19.8653	73.5751
Con	12	L-R_hindlimbs	0.518519	0.11	0.16	0.27	3.7037	20.9952	77.76
Con	12	L-R_hindlimbs	0.551724	0.11	0.18	0.29	3.44828	20.5944	71.015
Con	12	L-R_hindlimbs	0.566667	0.15	0.15	0.3	3.33333	17.9859	59.9531
Con	12	L-R_hindlimbs	0.633333	0.15	0.15	0.3	3.33333	15.1717	50.5724
Con	12	L-R_hindlimbs	0.517241	0.12	0.17	0.29	3.44828	20.0339	69.0824
Con	12	L-R_hindlimbs	0.652174	0.08	0.15	0.23	4.34783	21.4673	93.3359
Con	12	L-R_hindlimbs	0.555556	0.1	0.17	0.27	3.7037	19.1151	70.7968
Con	12	L-R_hindlimbs	0.5	0.13	0.19	0.32	3.125	19.4316	60.7238
Con	13	L-R_hindlimbs	0.540541	0.2	0.17	0.37	2.7027	16.9759	45.8808
Con	13	L-R_hindlimbs	0.617647	0.17	0.17	0.34	2.94118	19.2328	56.5671
Con	13	L-R_hindlimbs	0.547619	0.21	0.21	0.42	2.38095	18.3279	43.6378
Con	13	L-R_hindlimbs	0.553191	0.27	0.2	0.47	2.12766	15.5685	33.1244
Con	13	L-R_hindlimbs	0.571429	0.11	0.17	0.28	3.57143	22.5528	80.5458
Con	13	L-R_hindlimbs	0.588235	0.18	0.16	0.34	2.94118	18.3659	54.0172
Con	13	L-R_hindlimbs	0.516129	0.14	0.17	0.31	3.22581	21.8214	70.3915
Con	13	L-R_hindlimbs	0.566667	0.13	0.17	0.3	3.33333	19.8046	66.0154
Con	13	L-R_hindlimbs	0.592593	0.12	0.15	0.27	3.7037	20.7217	76.7472
Con	13	L-R_hindlimbs	0.608696	0.08	0.15	0.23	4.34783	22.6136	98.3202
Con	13	L-R_hindlimbs	0.527778	0.2	0.16	0.36	2.77778	17.2854	48.0151
Con	13	L-R_hindlimbs	0.548387	0.15	0.16	0.31	3.22581	20.0912	64.8105
Con	14	L-R_hindlimbs	0.59375	0.16	0.16	0.32	3.125	18.4737	57.7303
Con	14	L-R_hindlimbs	0.552632	0.2	0.18	0.38	2.63158	15.1717	39.9256
Con	14	L-R_hindlimbs	0.566667	0.14	0.16	0.3	3.33333	15.8042	52.6807
Con	14	L-R_hindlimbs	0.53125	0.15	0.17	0.32	3.125	16.6471	52.0221
Con	14	L-R_hindlimbs	0.666667	0.1	0.14	0.24	4.16667	21.3287	88.8696
Con	14	L-R_hindlimbs	0.555556	0.13	0.14	0.27	3.7037	16.9769	62.8773
Con	14	L-R_hindlimbs	0.5	0.17	0.19	0.36	2.77778	16.9312	47.0311
Con	14	L-R_hindlimbs	0.576923	0.12	0.14	0.26	3.84615	17.1604	66.0016
Con	14	L-R_hindlimbs	0.571429	0.11	0.17	0.28	3.57143	20.2835	72.4411
Con	15	L-R_hindlimbs	0.534884	0.27	0.16	0.43	2.32558	15.2273	35.4124
Con	15	L-R_hindlimbs	0.55814	0.21	0.22	0.43	2.32558	16.2176	37.7154
Con	15	L-R_hindlimbs	0.511628	0.25	0.18	0.43	2.32558	16.1073	37.4588
Con	15	L-R_hindlimbs	0.5	0.16	0.16	0.32	3.125	15.5337	48.5427
Con	15	L-R_hindlimbs	0.512195	0.22	0.19	0.41	2.43902	18.8108	45.8799
Con	15	L-R_hindlimbs	0.535714	0.13	0.15	0.28	3.57143	18.2018	65.0063
Con	15	L-R_hindlimbs	0.533333	0.13	0.17	0.3	3.33333	20.3959	67.9862
Con	15	L-R_hindlimbs	0.53125	0.16	0.16	0.32	3.125	19.7178	61.6182
Con	15	L-R_hindlimbs	0.5	0.14	0.16	0.3	3.33333	19.3853	64.6178
Con	15	L-R_hindlimbs	0.571429	0.13	0.15	0.28	3.57143	19.1929	68.546
Con	15	L-R_hindlimbs	0.538462	0.11	0.15	0.26	3.84615	20.5444	79.017
Con	16	L-R_hindlimbs	0.6	0.12	0.18	0.3	3.33333	20.3081	67.6937
Con	16	L-R_hindlimbs	0.551724	0.11	0.18	0.29	3.44828	21.2122	73.1454
Con	16	L-R_hindlimbs	0.678571	0.12	0.16	0.28	3.57143	16.2743	58.1224
Con	16	L-R_hindlimbs	0.592593	0.11	0.16	0.27	3.7037	20.1995	74.8129
Con	16	L-R_hindlimbs	0.586207	0.11	0.18	0.29	3.44828	19.6217	67.661
Con	16	L-R_hindlimbs	0.653846	0.11	0.15	0.26	3.84615	16.0462	61.7161
Con	16	L-R_hindlimbs	0.627907	0.22	0.21	0.43	2.32558	13.4434	31.2638
Con	16	L-R_hindlimbs	0.518519	0.1	0.17	0.27	3.7037	20.7689	76.9218
Con	16	L-R_hindlimbs	0.625	0.13	0.19	0.32	3.125	16.5685	51.7767
Con	16	L-R_hindlimbs	0.566667	0.12	0.18	0.3	3.33333	18.8779	62.9264
Con	17	L-R_hindlimbs	0.529412	0.16	0.18	0.34	2.94118	19.6057	57.6639
Con	17	L-R_hindlimbs	0.529412	0.17	0.17	0.34	2.94118	18.3746	54.0428
Con	17	L-R_hindlimbs	0.535714	0.11	0.17	0.28	3.57143	20.4515	73.041
Con	17	L-R_hindlimbs	0.518519	0.1	0.17	0.27	3.7037	19.6622	72.8228
Con	17	L-R_hindlimbs	0.580645	0.13	0.18	0.31	3.22581	17.1035	55.1724
Con	17	L-R_hindlimbs	0.558824	0.16	0.18	0.34	2.94118	17.5373	51.5803
Con	17	L-R_hindlimbs	0.513514	0.17	0.2	0.37	2.7027	17.587	47.5325
Con	17	L-R_hindlimbs	0.583333	0.09	0.15	0.24	4.16667	19.6361	81.8173
Con	17	L-R_hindlimbs	0.575758	0.15	0.18	0.33	3.0303	15.5063	46.9887
Con	17	L-R_hindlimbs	0.540541	0.17	0.2	0.37	2.7027	18.3139	49.4969
Con	17	L-R_hindlimbs	0.576923	0.11	0.15	0.26	3.84615	19.4511	74.812
Con	17	L-R_hindlimbs	0.517241	0.12	0.17	0.29	3.44828	20.2823	69.9391
Con	18	L-R_hindlimbs	0.6	0.14	0.16	0.3	3.33333	17.1928	57.3094
Con	18	L-R_hindlimbs	0.522727	0.22	0.22	0.44	2.27273	14.6091	33.2026
Con	18	L-R_hindlimbs	0.54	0.27	0.23	0.5	2	13.7647	27.5294
Con	18	L-R_hindlimbs	0.533333	0.14	0.16	0.3	3.33333	18.4584	61.528
Con	18	L-R_hindlimbs	0.607143	0.11	0.17	0.28	3.57143	17.7532	63.4043
Con	18	L-R_hindlimbs	0.517241	0.13	0.16	0.29	3.44828	18.274	63.0136
Con	18	L-R_hindlimbs	0.53125	0.16	0.16	0.32	3.125	18.9878	59.3368
Con	18	L-R_hindlimbs	0.541667	0.11	0.13	0.24	4.16667	19.1584	79.8265
Con	18	L-R_hindlimbs	0.56	0.11	0.14	0.25	4	20.5663	82.265
Con	18	L-R_hindlimbs	0.56	0.11	0.14	0.25	4	17.4127	69.651
Con	18	L-R_hindlimbs	0.551724	0.13	0.16	0.29	3.44828	18.7664	64.7117
Dox	1	L-R_hindlimbs	0.516129	0.14	0.17	0.31	3.22581	19.5824	63.1691
Dox	1	L-R_hindlimbs	0.533333	0.14	0.16	0.3	3.33333	17.3153	57.7176
Dox	1	L-R_hindlimbs	0.551724	0.12	0.17	0.29	3.44828	20.4643	70.5667
Dox	1	L-R_hindlimbs	0.56	0.12	0.13	0.25	4	19.2535	77.0138
Dox	1	L-R_hindlimbs	0.515152	0.14	0.19	0.33	3.0303	22.5194	68.2406
Dox	1	L-R_hindlimbs	0.551724	0.13	0.16	0.29	3.44828	21.5892	74.4456
Dox	2	L-R_hindlimbs	0.558824	0.15	0.19	0.34	2.94118	21.6371	63.6384
Dox	2	L-R_hindlimbs	0.5	0.14	0.18	0.32	3.125	21.3544	66.7326
Dox	2	L-R_hindlimbs	0.535714	0.12	0.16	0.28	3.57143	19.8578	70.9209
Dox	2	L-R_hindlimbs	0.607143	0.11	0.17	0.28	3.57143	20.891	74.6109
Dox	2	L-R_hindlimbs	0.518519	0.11	0.16	0.27	3.7037	21.6378	80.1401
Dox	2	L-R_hindlimbs	0.5	0.1	0.16	0.26	3.84615	21.1203	81.232
Dox	2	L-R_hindlimbs	0.583333	0.1	0.14	0.24	4.16667	21.9615	91.5062
Dox	2	L-R_hindlimbs	0.538462	0.1	0.16	0.26	3.84615	21.3016	81.9294
Dox	2	L-R_hindlimbs	0.5	0.11	0.17	0.28	3.57143	19.287	68.8821
Dox	7	L-R_hindlimbs	0.586207	0.16	0.13	0.29	3.44828	15.1252	52.156
Dox	7	L-R_hindlimbs	0.59375	0.17	0.15	0.32	3.125	18.7381	58.5566
Dox	7	L-R_hindlimbs	0.538462	0.11	0.15	0.26	3.84615	17.802	68.4691
Dox	7	L-R_hindlimbs	0.538462	0.14	0.12	0.26	3.84615	14.6043	56.1705
Dox	7	L-R_hindlimbs	0.576923	0.11	0.15	0.26	3.84615	18.6639	71.7842
Dox	7	L-R_hindlimbs	0.612903	0.14	0.17	0.31	3.22581	17.5362	56.5684
Dox	7	L-R_hindlimbs	0.515152	0.17	0.16	0.33	3.0303	16.8206	50.9715
Dox	7	L-R_hindlimbs	0.589744	0.2	0.19	0.39	2.5641	17.6529	45.2637
Dox	8	L-R_hindlimbs	0.53125	0.16	0.16	0.32	3.125	16.9924	53.1012
Dox	8	L-R_hindlimbs	0.567568	0.2	0.17	0.37	2.7027	15.6015	42.1662
Dox	8	L-R_hindlimbs	0.5625	0.13	0.19	0.32	3.125	19.6709	61.4715
Dox	8	L-R_hindlimbs	0.62963	0.11	0.16	0.27	3.7037	18.0707	66.9286
Dox	8	L-R_hindlimbs	0.535714	0.12	0.16	0.28	3.57143	18.4083	65.744
Dox	8	L-R_hindlimbs	0.515152	0.14	0.19	0.33	3.0303	18.9275	57.3561
Dox	8	L-R_hindlimbs	0.540541	0.13	0.24	0.37	2.7027	14.3439	38.7673
Dox	8	L-R_hindlimbs	0.575758	0.18	0.15	0.33	3.0303	15.0963	45.7463
Dox	8	L-R_hindlimbs	0.526316	0.2	0.18	0.38	2.63158	14.0509	36.9759
Dox	8	L-R_hindlimbs	0.525	0.21	0.19	0.4	2.5	15.5981	38.9952
Dox	9	L-R_hindlimbs	0.529412	0.19	0.15	0.34	2.94118	15.0072	44.1389
Dox	9	L-R_hindlimbs	0.527778	0.19	0.17	0.36	2.77778	17.0352	47.3201
Dox	9	L-R_hindlimbs	0.5	0.24	0.14	0.38	2.63158	13.7483	36.1796
Dox	9	L-R_hindlimbs	0.538462	0.11	0.15	0.26	3.84615	19.1259	73.5612
Dox	9	L-R_hindlimbs	0.5	0.11	0.15	0.26	3.84615	18.3104	70.4245
Dox	9	L-R_hindlimbs	0.533333	0.17	0.13	0.3	3.33333	14.1506	47.1687
Dox	9	L-R_hindlimbs	0.515152	0.17	0.16	0.33	3.0303	16.3549	49.5602
Dox	9	L-R_hindlimbs	0.6	0.16	0.14	0.3	3.33333	13.5666	45.2221
Dox	9	L-R_hindlimbs	0.566667	0.15	0.15	0.3	3.33333	16.754	55.8466
Dox	9	L-R_hindlimbs	0.518519	0.12	0.15	0.27	3.7037	16.8099	62.259
Dox	10	L-R_hindlimbs	0.53125	0.16	0.16	0.32	3.125	17.7102	55.3444
Dox	10	L-R_hindlimbs	0.592593	0.13	0.14	0.27	3.7037	18.3296	67.8875
Dox	10	L-R_hindlimbs	0.518519	0.14	0.13	0.27	3.7037	16.525	61.2037
Dox	10	L-R_hindlimbs	0.517241	0.13	0.16	0.29	3.44828	19.905	68.6381
Dox	10	L-R_hindlimbs	0.636364	0.09	0.13	0.22	4.54545	19.8541	90.2459
Dox	10	L-R_hindlimbs	0.6	0.1	0.15	0.25	4	21.8915	87.5662
Dox	10	L-R_hindlimbs	0.521739	0.09	0.14	0.23	4.34783	19.3637	84.19
Dox	10	L-R_hindlimbs	0.75	0.09	0.11	0.2	5	17.0014	85.0068
Dox	10	L-R_hindlimbs	0.666667	0.11	0.13	0.24	4.16667	19.755	82.3127
Dox	10	L-R_hindlimbs	0.590909	0.09	0.13	0.22	4.54545	18.224	82.8362
Dox	10	L-R_hindlimbs	0.761905	0.1	0.11	0.21	4.7619	16.9936	80.9219
Dox	10	L-R_hindlimbs	0.826087	0.11	0.12	0.23	4.34783	17.8224	77.4889
Dox	10	L-R_hindlimbs	0.769231	0.12	0.14	0.26	3.84615	16.2674	62.5668
Dox	12	L-R_hindlimbs	0.555556	0.12	0.15	0.27	3.7037	18.708	69.2889
Dox	12	L-R_hindlimbs	0.538462	0.09	0.17	0.26	3.84615	21.4151	82.3659
Dox	12	L-R_hindlimbs	0.52	0.14	0.11	0.25	4	11.016	44.0641
Dox	12	L-R_hindlimbs	0.647059	0.16	0.18	0.34	2.94118	17.0778	50.2289
Dox	12	L-R_hindlimbs	0.5625	0.13	0.19	0.32	3.125	17.8113	55.6604
Dox	12	L-R_hindlimbs	0.733333	0.12	0.18	0.3	3.33333	12.7006	42.3353
Dox	13	L-R_hindlimbs	0.5	0.15	0.13	0.28	3.57143	15.5638	55.5849
Dox	13	L-R_hindlimbs	0.533333	0.11	0.19	0.3	3.33333	22.1443	73.8142
Dox	13	L-R_hindlimbs	0.516129	0.16	0.15	0.31	3.22581	18.1355	58.5016
Dox	13	L-R_hindlimbs	0.518519	0.12	0.15	0.27	3.7037	16.427	60.8409
Dox	13	L-R_hindlimbs	0.576923	0.13	0.13	0.26	3.84615	17.5377	67.4526
Dox	13	L-R_hindlimbs	0.642857	0.12	0.16	0.28	3.57143	18.6587	66.6382
Dox	13	L-R_hindlimbs	0.617647	0.16	0.18	0.34	2.94118	21.479	63.1734
Dox	13	L-R_hindlimbs	0.647059	0.17	0.17	0.34	2.94118	13.8231	40.6561
Dox	13	L-R_hindlimbs	0.5	0.17	0.13	0.3	3.33333	15.9118	53.0393
Dox	14	L-R_hindlimbs	0.5625	0.17	0.15	0.32	3.125	17.5275	54.7733
Dox	14	L-R_hindlimbs	0.518519	0.13	0.14	0.27	3.7037	18.6242	68.9784
Dox	14	L-R_hindlimbs	0.541667	0.11	0.13	0.24	4.16667	15.575	64.8958
Dox	14	L-R_hindlimbs	0.518519	0.1	0.17	0.27	3.7037	22.0936	81.8283
Dox	14	L-R_hindlimbs	0.65	0.09	0.11	0.2	5	18.3332	91.6661
Dox	14	L-R_hindlimbs	0.52381	0.08	0.13	0.21	4.7619	21.2349	101.118
Dox	14	L-R_hindlimbs	0.56	0.1	0.15	0.25	4	18.876	75.5039
Dox	14	L-R_hindlimbs	0.541667	0.1	0.14	0.24	4.16667	19.5308	81.3783
Dox	14	L-R_hindlimbs	0.558824	0.21	0.13	0.34	2.94118	14.438	42.4646
Dox	14	L-R_hindlimbs	0.535714	0.14	0.14	0.28	3.57143	17.2474	61.598
Dox	15	L-R_hindlimbs	0.555556	0.12	0.15	0.27	3.7037	23.4851	86.9819
Dox	15	L-R_hindlimbs	0.521739	0.1	0.13	0.23	4.34783	20.617	89.6393
Dox	15	L-R_hindlimbs	0.607143	0.09	0.19	0.28	3.57143	29.7746	106.338
Dox	15	L-R_hindlimbs	0.652174	0.08	0.15	0.23	4.34783	22.4192	97.4749
Dox	15	L-R_hindlimbs	0.548387	0.13	0.18	0.31	3.22581	20.3405	65.6144
Dox	15	L-R_hindlimbs	0.545455	0.21	0.12	0.33	3.0303	12.8677	38.9931
Dox	15	L-R_hindlimbs	0.894737	0.06	0.13	0.19	5.26316	20.186	106.242
Dox	15	L-R_hindlimbs	0.85	0.09	0.11	0.2	5	19.4585	97.2927
Dox	16	L-R_hindlimbs	0.708333	0.09	0.15	0.24	4.16667	20.1707	84.0444
Dox	16	L-R_hindlimbs	0.791667	0.11	0.13	0.24	4.16667	15.6069	65.0289
Dox	16	L-R_hindlimbs	0.5	0.13	0.15	0.28	3.57143	16.5999	59.2852
Dox	16	L-R_hindlimbs	0.516129	0.14	0.17	0.31	3.22581	16.1611	52.1327
Dox	16	L-R_hindlimbs	0.964286	0.14	0.14	0.28	3.57143	19.5153	69.6976
Dox	16	L-R_hindlimbs	0.857143	0.14	0.14	0.28	3.57143	19.5153	69.6976
Dox	16	L-R_hindlimbs	0.857143	0.1	0.11	0.21	4.7619	12.6929	60.4424
Dox	16	L-R_hindlimbs	0.607143	0.12	0.16	0.28	3.57143	15.9745	57.0518
Dox	16	L-R_hindlimbs	0.62069	0.14	0.15	0.29	3.44828	17.2656	59.5366
Dox	16	L-R_hindlimbs	0.695652	0.07	0.16	0.23	4.34783	22.0458	95.8513
Dox	16	L-R_hindlimbs	0.761905	0.08	0.13	0.21	4.7619	16.8333	80.1585
Dox	17	L-R_hindlimbs	0.517241	0.13	0.16	0.29	3.44828	18.4295	63.55
Dox	17	L-R_hindlimbs	0.518519	0.12	0.15	0.27	3.7037	18.5913	68.8567
Dox	17	L-R_hindlimbs	0.875	0.19	0.13	0.32	3.125	13.9463	43.5821
Dox	17	L-R_hindlimbs	0.878049	0.3	0.11	0.41	2.43902	12.2169	29.7973
Dox	17	L-R_hindlimbs	0.571429	0.08	0.13	0.21	4.7619	20.3586	96.9457
Dox	17	L-R_hindlimbs	0.625	0.06	0.18	0.24	4.16667	24.0654	100.273
Dox	17	L-R_hindlimbs	0.516129	0.12	0.19	0.31	3.22581	19.0887	61.5764
Dox	17	L-R_hindlimbs	0.56	0.09	0.16	0.25	4	18.059	72.2359
Dox	18	L-R_hindlimbs	0.521739	0.08	0.15	0.23	4.34783	21.7966	94.768
Dox	18	L-R_hindlimbs	0.666667	0.08	0.13	0.21	4.7619	19.2128	91.4893
Dox	18	L-R_hindlimbs	0.65	0.07	0.13	0.2	5	24.0707	120.353
Dox	18	L-R_hindlimbs	0.666667	0.06	0.12	0.18	5.55556	18.3702	102.056
Dox	18	L-R_hindlimbs	0.533333	0.17	0.13	0.3	3.33333	11.4288	38.096
Dox	18	L-R_hindlimbs	0.567568	0.22	0.15	0.37	2.7027	12.0451	32.5544
Dox	18	L-R_hindlimbs	0.514286	0.2	0.15	0.35	2.85714	11.5725	33.0642
Dox	18	L-R_hindlimbs	0.631579	0.2	0.18	0.38	2.63158	12.078	31.7843
Dox	18	L-R_hindlimbs	0.529412	0.2	0.14	0.34	2.94118	13.592	39.9764
Dox	18	L-R_hindlimbs	0.625	0.16	0.16	0.32	3.125	14.6624	45.82
Dox	18	L-R_hindlimbs	0.56	0.13	0.12	0.25	4	14.692	58.7682
Dox	18	L-R_hindlimbs	0.65	0.06	0.14	0.2	5	21.461	107.305
Dox	1	L-R_hindlimbs	0.545455	0.17	0.16	0.33	3.0303	17.403	52.7365
Dox	1	L-R_hindlimbs	0.535714	0.12	0.16	0.28	3.57143	18.5545	66.266
Dox	1	L-R_hindlimbs	0.53125	0.19	0.13	0.32	3.125	14.6578	45.8055
Dox	1	L-R_hindlimbs	0.555556	0.13	0.14	0.27	3.7037	18.377	68.063
Dox	1	L-R_hindlimbs	0.548387	0.15	0.16	0.31	3.22581	18.6625	60.2017
Dox	1	L-R_hindlimbs	0.545455	0.17	0.16	0.33	3.0303	18.2627	55.3414
Dox	1	L-R_hindlimbs	0.545455	0.17	0.16	0.33	3.0303	16.0412	48.6098
Dox	1	L-R_hindlimbs	0.515152	0.16	0.17	0.33	3.0303	17.9322	54.3399
Dox	1	L-R_hindlimbs	0.586207	0.13	0.16	0.29	3.44828	18.9719	65.4202
Dox	1	L-R_hindlimbs	0.62069	0.13	0.16	0.29	3.44828	16.9492	58.4456
Dox	2	L-R_hindlimbs	0.586207	0.13	0.16	0.29	3.44828	19.0308	65.6235
Dox	2	L-R_hindlimbs	0.548387	0.15	0.16	0.31	3.22581	20.5384	66.253
Dox	2	L-R_hindlimbs	0.538462	0.23	0.16	0.39	2.5641	15.8756	40.7066
Dox	2	L-R_hindlimbs	0.529412	0.16	0.18	0.34	2.94118	19.0797	56.1169
Dox	2	L-R_hindlimbs	0.514286	0.17	0.18	0.35	2.85714	17.6974	50.5639
Dox	2	L-R_hindlimbs	0.512195	0.24	0.17	0.41	2.43902	13.7148	33.4507
Dox	2	L-R_hindlimbs	0.514286	0.17	0.18	0.35	2.85714	15.9911	45.6888
Dox	2	L-R_hindlimbs	0.555556	0.13	0.14	0.27	3.7037	15.1353	56.0565
Dox	2	L-R_hindlimbs	0.571429	0.17	0.18	0.35	2.85714	17.9434	51.2669
Dox	2	L-R_hindlimbs	0.571429	0.22	0.2	0.42	2.38095	17.124	40.7714
Dox	7	L-R_hindlimbs	0.516129	0.15	0.16	0.31	3.22581	17.3671	56.023
Dox	7	L-R_hindlimbs	0.62069	0.14	0.15	0.29	3.44828	18.8226	64.9054
Dox	7	L-R_hindlimbs	0.594595	0.23	0.14	0.37	2.7027	11.2195	30.323
Dox	7	L-R_hindlimbs	0.588235	0.17	0.17	0.34	2.94118	19.3872	57.0213
Dox	7	L-R_hindlimbs	0.534884	0.23	0.2	0.43	2.32558	12.8156	29.8036
Dox	7	L-R_hindlimbs	0.615385	0.26	0.13	0.39	2.5641	11.1859	28.6818
Dox	7	L-R_hindlimbs	0.513514	0.22	0.15	0.37	2.7027	11.7715	31.8149
Dox	7	L-R_hindlimbs	0.513514	0.21	0.16	0.37	2.7027	13.1174	35.4526
Dox	7	L-R_hindlimbs	0.5	0.19	0.15	0.34	2.94118	12.1331	35.6856
Dox	7	L-R_hindlimbs	0.653846	0.12	0.14	0.26	3.84615	17.8287	68.5718
Dox	7	L-R_hindlimbs	0.633333	0.14	0.16	0.3	3.33333	15.7775	52.5918
Dox	8	L-R_hindlimbs	0.567568	0.19	0.18	0.37	2.7027	13.3701	36.1353
Dox	8	L-R_hindlimbs	0.548387	0.17	0.14	0.31	3.22581	17.2054	55.5014
Dox	8	L-R_hindlimbs	0.521739	0.1	0.13	0.23	4.34783	18.4836	80.3634
Dox	8	L-R_hindlimbs	0.518519	0.11	0.16	0.27	3.7037	17.6996	65.5539
Dox	8	L-R_hindlimbs	0.612903	0.14	0.17	0.31	3.22581	14.6978	47.4121
Dox	8	L-R_hindlimbs	0.607143	0.14	0.14	0.28	3.57143	15.6189	55.7819
Dox	8	L-R_hindlimbs	0.514286	0.16	0.19	0.35	2.85714	13.5537	38.7248
Dox	8	L-R_hindlimbs	0.575758	0.19	0.14	0.33	3.0303	15.4431	46.7974
Dox	8	L-R_hindlimbs	0.53125	0.15	0.17	0.32	3.125	18.1874	56.8358
Dox	9	L-R_hindlimbs	0.518519	0.12	0.15	0.27	3.7037	19.7842	73.2748
Dox	9	L-R_hindlimbs	0.52	0.1	0.15	0.25	4	18.4198	73.6794
Dox	9	L-R_hindlimbs	0.6	0.08	0.12	0.2	5	19.1496	95.7478
Dox	9	L-R_hindlimbs	0.571429	0.08	0.13	0.21	4.7619	17.1439	81.6375
Dox	9	L-R_hindlimbs	0.9	0.08	0.12	0.2	5	18.2644	91.3222
Dox	9	L-R_hindlimbs	0.782609	0.1	0.13	0.23	4.34783	15.4761	67.2874
Dox	9	L-R_hindlimbs	0.909091	0.11	0.11	0.22	4.54545	14.7532	67.0598
Dox	9	L-R_hindlimbs	0.740741	0.14	0.13	0.27	3.7037	15.9963	59.2454
Dox	9	L-R_hindlimbs	0.724138	0.16	0.13	0.29	3.44828	15.1351	52.1901
Dox	9	L-R_hindlimbs	0.533333	0.16	0.14	0.3	3.33333	18.1638	60.5461
Dox	10	L-R_hindlimbs	0.583333	0.1	0.14	0.24	4.16667	18.6369	77.6538
Dox	10	L-R_hindlimbs	0.541667	0.11	0.13	0.24	4.16667	19.5421	81.4255
Dox	10	L-R_hindlimbs	0.5	0.11	0.17	0.28	3.57143	18.5762	66.3434
Dox	10	L-R_hindlimbs	0.571429	0.17	0.18	0.35	2.85714	18.3673	52.478
Dox	10	L-R_hindlimbs	0.85	0.07	0.13	0.2	5	16.9518	84.759
Dox	10	L-R_hindlimbs	0.681818	0.08	0.14	0.22	4.54545	21.2606	96.6392
Dox	10	L-R_hindlimbs	0.888889	0.07	0.11	0.18	5.55556	18.6637	103.687
Dox	10	L-R_hindlimbs	0.952381	0.08	0.13	0.21	4.7619	20.1286	95.8506
Dox	10	L-R_hindlimbs	0.595238	0.26	0.16	0.42	2.38095	16.5273	39.3508
Dox	10	L-R_hindlimbs	0.592593	0.11	0.16	0.27	3.7037	19.8321	73.4524
Dox	12	L-R_hindlimbs	0.583333	0.1	0.14	0.24	4.16667	19.7758	82.3991
Dox	12	L-R_hindlimbs	0.541667	0.09	0.15	0.24	4.16667	17.0219	70.9244
Dox	12	L-R_hindlimbs	0.542857	0.16	0.19	0.35	2.85714	16.2415	46.4043
Dox	12	L-R_hindlimbs	0.5	0.21	0.19	0.4	2.5	15.7295	39.3238
Dox	12	L-R_hindlimbs	0.638889	0.22	0.14	0.36	2.77778	12.1129	33.6471
Dox	12	L-R_hindlimbs	0.527778	0.19	0.17	0.36	2.77778	14.2281	39.5226
Dox	12	L-R_hindlimbs	0.536585	0.22	0.19	0.41	2.43902	13.6659	33.3315
Dox	12	L-R_hindlimbs	0.65	0.07	0.13	0.2	5	17.4241	87.1206
Dox	12	L-R_hindlimbs	0.56	0.09	0.16	0.25	4	19.0475	76.1898
Dox	13	L-R_hindlimbs	0.708333	0.1	0.14	0.24	4.16667	16.4109	68.3788
Dox	13	L-R_hindlimbs	0.653846	0.11	0.15	0.26	3.84615	17.05	65.5769
Dox	13	L-R_hindlimbs	0.727273	0.08	0.14	0.22	4.54545	17.102	77.7365
Dox	13	L-R_hindlimbs	0.68	0.11	0.14	0.25	4	17.4442	69.7768
Dox	13	L-R_hindlimbs	0.56	0.11	0.14	0.25	4	14.8404	59.3616
Dox	13	L-R_hindlimbs	0.631579	0.06	0.13	0.19	5.26316	18.8669	99.2997
Dox	14	L-R_hindlimbs	0.612903	0.16	0.15	0.31	3.22581	17.1745	55.4017
Dox	14	L-R_hindlimbs	0.545455	0.16	0.17	0.33	3.0303	16.2766	49.323
Dox	14	L-R_hindlimbs	0.6	0.08	0.17	0.25	4	20.3038	81.2153
Dox	14	L-R_hindlimbs	0.511628	0.26	0.17	0.43	2.32558	11.4799	26.6975
Dox	14	L-R_hindlimbs	0.605263	0.25	0.13	0.38	2.63158	14.8107	38.9754
Dox	14	L-R_hindlimbs	0.515152	0.15	0.18	0.33	3.0303	15.8366	47.9896
Dox	14	L-R_hindlimbs	0.5	0.08	0.14	0.22	4.54545	19.4525	88.4206
Dox	14	L-R_hindlimbs	0.583333	0.09	0.15	0.24	4.16667	18.2632	76.0966
Dox	14	L-R_hindlimbs	0.538462	0.1	0.16	0.26	3.84615	16.7125	64.2788
Dox	15	L-R_hindlimbs	0.518519	0.11	0.16	0.27	3.7037	22.0577	81.6952
Dox	15	L-R_hindlimbs	0.565217	0.09	0.14	0.23	4.34783	18.4335	80.1458
Dox	15	L-R_hindlimbs	0.809524	0.08	0.13	0.21	4.7619	19.56	93.1427
Dox	15	L-R_hindlimbs	0.809524	0.08	0.13	0.21	4.7619	19.8685	94.6117
Dox	15	L-R_hindlimbs	0.666667	0.12	0.12	0.24	4.16667	15.7448	65.6034
Dox	15	L-R_hindlimbs	0.575758	0.19	0.14	0.33	3.0303	17.5184	53.086
Dox	15	L-R_hindlimbs	0.7	0.08	0.12	0.2	5	17.2923	86.4615
Dox	15	L-R_hindlimbs	1	0.13	0.12	0.15	6.66667	17.807	80.108
Dox	15	L-R_hindlimbs	0.944444	0.08	0.1	0.18	5.55556	15.3531	85.2949
Dox	15	L-R_hindlimbs	0.863636	0.09	0.13	0.22	4.54545	21.5326	97.8753
Dox	16	L-R_hindlimbs	0.607143	0.13	0.15	0.28	3.57143	19.286	68.8787
Dox	16	L-R_hindlimbs	0.571429	0.12	0.16	0.28	3.57143	18.4988	66.0671
Dox	16	L-R_hindlimbs	0.566667	0.14	0.16	0.3	3.33333	14.5774	48.5915
Dox	16	L-R_hindlimbs	0.5	0.11	0.15	0.26	3.84615	19.3048	74.2491
Dox	16	L-R_hindlimbs	0.538462	0.1	0.16	0.26	3.84615	20.9399	80.5382
Dox	16	L-R_hindlimbs	0.684211	0.09	0.1	0.19	5.26316	14.9747	78.8143
Dox	16	L-R_hindlimbs	0.851852	0.09	0.18	0.27	3.7037	27.1778	100.659
Dox	17	L-R_hindlimbs	0.580645	0.15	0.16	0.31	3.22581	17.0565	55.0208
Dox	17	L-R_hindlimbs	0.5	0.14	0.16	0.3	3.33333	20.0358	66.786
Dox	17	L-R_hindlimbs	0.52	0.08	0.17	0.25	4	22.4369	89.7474
Dox	17	L-R_hindlimbs	0.535714	0.1	0.18	0.28	3.57143	21.4068	76.453
Dox	17	L-R_hindlimbs	0.52	0.1	0.15	0.25	4	19.531	78.1238
Dox	17	L-R_hindlimbs	0.607143	0.1	0.18	0.28	3.57143	21.6242	77.2293
Dox	17	L-R_hindlimbs	0.518519	0.09	0.18	0.27	3.7037	20.319	75.2555
Dox	17	L-R_hindlimbs	0.818182	0.09	0.13	0.22	4.54545	20.7018	94.0993
Dox	17	L-R_hindlimbs	0.809524	0.07	0.14	0.21	4.7619	20.1537	95.9698
Dox	18	L-R_hindlimbs	0.545455	0.09	0.13	0.22	4.54545	20.0803	91.274
Dox	18	L-R_hindlimbs	0.5	0.1	0.16	0.26	3.84615	21.2407	81.695
Dox	18	L-R_hindlimbs	0.538462	0.11	0.15	0.26	3.84615	19.2551	74.0581
Dox	18	L-R_hindlimbs	0.5	0.1	0.14	0.24	4.16667	15.881	66.1709
Dox	18	L-R_hindlimbs	0.52	0.1	0.15	0.25	4	19.7267	78.9067
Dox	18	L-R_hindlimbs	0.56	0.1	0.15	0.25	4	18.9049	75.6196
Dox	18	L-R_hindlimbs	0.52381	0.08	0.13	0.21	4.7619	20.4217	97.2461
Dox	18	L-R_hindlimbs	0.5	0.07	0.15	0.22	4.54545	21.8241	99.2004
Dox	18	L-R_hindlimbs	0.947368	0.07	0.12	0.19	5.26316	20.9538	110.283
Dox	18	L-R_hindlimbs	0.888889	0.06	0.12	0.18	5.55556	24.6391	136.884
Dox	1	L-R_hindlimbs	0.941176	0.17	0.17	0.34	2.94118	20.4055	60.0163
Dox	1	L-R_hindlimbs	0.970588	0.17	0.17	0.34	2.94118	20.4055	60.0163
Dox	1	L-R_hindlimbs	0.966667	0.13	0.17	0.3	3.33333	22.7259	75.7529
Dox	1	L-R_hindlimbs	0.580645	0.15	0.16	0.31	3.22581	19.9631	64.3971
Dox	1	L-R_hindlimbs	0.540541	0.16	0.21	0.37	2.7027	18.8047	50.8236
Dox	1	L-R_hindlimbs	0.588235	0.17	0.17	0.34	2.94118	18.7025	55.0074
Dox	1	L-R_hindlimbs	0.548387	0.13	0.18	0.31	3.22581	20.7629	66.9771
Dox	1	L-R_hindlimbs	0.534884	0.21	0.22	0.43	2.32558	19.6887	45.7877
Dox	1	L-R_hindlimbs	0.547619	0.24	0.18	0.42	2.38095	15.2287	36.2587
Dox	1	L-R_hindlimbs	0.55814	0.22	0.21	0.43	2.32558	18.0909	42.0718
Dox	2	L-R_hindlimbs	0.52	0.11	0.14	0.25	4	17.9679	71.8717
Dox	2	L-R_hindlimbs	0.53125	0.16	0.16	0.32	3.125	15.9934	49.9795
Dox	2	L-R_hindlimbs	0.518519	0.11	0.16	0.27	3.7037	21.1419	78.3033
Dox	2	L-R_hindlimbs	0.538462	0.11	0.15	0.26	3.84615	18.561	71.3885
Dox	2	L-R_hindlimbs	0.592593	0.11	0.16	0.27	3.7037	17.7765	65.839
Dox	2	L-R_hindlimbs	0.5	0.13	0.17	0.3	3.33333	20.8565	69.5218
Dox	2	L-R_hindlimbs	0.565217	0.09	0.14	0.23	4.34783	20.4179	88.7736
Dox	2	L-R_hindlimbs	0.576923	0.12	0.14	0.26	3.84615	17.3966	66.9102
Dox	2	L-R_hindlimbs	0.5	0.11	0.15	0.26	3.84615	19.148	73.6461
Dox	7	L-R_hindlimbs	0.535714	0.13	0.15	0.28	3.57143	16.4328	58.6887
Dox	7	L-R_hindlimbs	0.551724	0.13	0.16	0.29	3.44828	17.734	61.1516
Dox	7	L-R_hindlimbs	0.604651	0.27	0.16	0.43	2.32558	12.9771	30.1793
Dox	7	L-R_hindlimbs	0.513514	0.19	0.18	0.37	2.7027	15.1838	41.0373
Dox	7	L-R_hindlimbs	0.540541	0.2	0.17	0.37	2.7027	14.5775	39.3986
Dox	7	L-R_hindlimbs	0.515152	0.18	0.15	0.33	3.0303	12.0878	36.6298
Dox	7	L-R_hindlimbs	0.555556	0.2	0.16	0.36	2.77778	15.0149	41.7079
Dox	7	L-R_hindlimbs	0.527778	0.18	0.18	0.36	2.77778	16.7981	46.6614
Dox	8	L-R_hindlimbs	0.55	0.19	0.21	0.4	2.5	17.7235	44.3088
Dox	8	L-R_hindlimbs	0.542857	0.2	0.15	0.35	2.85714	13.702	39.1486
Dox	8	L-R_hindlimbs	0.535714	0.1	0.18	0.28	3.57143	22.2009	79.289
Dox	8	L-R_hindlimbs	0.5625	0.16	0.16	0.32	3.125	14.4624	45.1949
Dox	8	L-R_hindlimbs	0.564103	0.23	0.16	0.39	2.5641	15.6756	40.1939
Dox	8	L-R_hindlimbs	0.55814	0.25	0.18	0.43	2.32558	12.4891	29.0443
Dox	8	L-R_hindlimbs	0.527778	0.19	0.17	0.36	2.77778	14.4354	40.0983
Dox	8	L-R_hindlimbs	0.538462	0.19	0.2	0.39	2.5641	16.4712	42.2337
Dox	8	L-R_hindlimbs	0.542857	0.18	0.17	0.35	2.85714	14.8858	42.5308
Dox	8	L-R_hindlimbs	0.516129	0.16	0.15	0.31	3.22581	17.4252	56.2104
Dox	9	L-R_hindlimbs	0.52	0.11	0.14	0.25	4	17.1384	68.5534
Dox	9	L-R_hindlimbs	0.535714	0.13	0.15	0.28	3.57143	18.1975	64.9909
Dox	9	L-R_hindlimbs	0.8	0.05	0.1	0.15	6.66667	17.589	117.26
Dox	9	L-R_hindlimbs	0.842105	0.08	0.11	0.19	5.26316	17.7474	93.4076
Dox	9	L-R_hindlimbs	0.791667	0.11	0.13	0.24	4.16667	15.4077	64.1988
Dox	9	L-R_hindlimbs	0.857143	0.08	0.13	0.21	4.7619	18.0873	86.1298
Dox	9	L-R_hindlimbs	0.555556	0.13	0.14	0.27	3.7037	15.2578	56.5105
Dox	9	L-R_hindlimbs	0.62069	0.13	0.16	0.29	3.44828	15.3537	52.9437
Dox	9	L-R_hindlimbs	1	0.08	0.09	0.17	5.88235	17.8785	105.168
Dox	9	L-R_hindlimbs	1	0.09	0.12	0.21	4.7619	16.5822	78.9631
Dox	10	L-R_hindlimbs	0.56	0.09	0.16	0.25	4	22.4021	89.6082
Dox	10	L-R_hindlimbs	0.65	0.09	0.11	0.2	5	17.552	87.7602
Dox	10	L-R_hindlimbs	0.666667	0.08	0.13	0.21	4.7619	20.4568	97.4131
Dox	10	L-R_hindlimbs	0.625	0.09	0.15	0.24	4.16667	19.5108	81.2952
Dox	10	L-R_hindlimbs	0.625	0.09	0.15	0.24	4.16667	20.6728	86.1366
Dox	10	L-R_hindlimbs	0.9	0.09	0.11	0.2	5	16.3886	81.9428
Dox	10	L-R_hindlimbs	0.904762	0.07	0.14	0.21	4.7619	22.0296	104.903
Dox	10	L-R_hindlimbs	0.947368	0.06	0.13	0.19	5.26316	19.2839	101.494
Dox	10	L-R_hindlimbs	0.842105	0.07	0.12	0.19	5.26316	19.7886	104.15
Dox	12	L-R_hindlimbs	0.8	0.07	0.13	0.2	5	19.1438	95.7191
Dox	12	L-R_hindlimbs	0.5	0.1	0.16	0.26	3.84615	19.718	75.8384
Dox	12	L-R_hindlimbs	0.521739	0.1	0.13	0.23	4.34783	17.8831	77.7525
Dox	12	L-R_hindlimbs	0.708333	0.1	0.14	0.24	4.16667	18.7207	78.0029
Dox	12	L-R_hindlimbs	0.695652	0.09	0.14	0.23	4.34783	20.7219	90.0953
Dox	12	L-R_hindlimbs	0.527778	0.21	0.15	0.36	2.77778	13.1996	36.6655
Dox	12	L-R_hindlimbs	0.551724	0.15	0.14	0.29	3.44828	15.0374	51.8532
Dox	12	L-R_hindlimbs	0.522727	0.28	0.16	0.44	2.27273	11.2197	25.4992
Dox	12	L-R_hindlimbs	0.560976	0.21	0.2	0.41	2.43902	15.0768	36.7726
Dox	12	L-R_hindlimbs	0.615385	0.2	0.19	0.39	2.5641	10.0817	25.8506
Dox	13	L-R_hindlimbs	0.586207	0.13	0.16	0.29	3.44828	17.8851	61.6727
Dox	13	L-R_hindlimbs	0.535714	0.11	0.17	0.28	3.57143	22.0218	78.6495
Dox	13	L-R_hindlimbs	0.615385	0.21	0.18	0.39	2.5641	13.9195	35.6909
Dox	13	L-R_hindlimbs	0.607843	0.36	0.15	0.51	1.96078	12.0956	23.7168
Dox	13	L-R_hindlimbs	0.519231	0.3	0.22	0.52	1.92308	17.1106	32.905
Dox	13	L-R_hindlimbs	0.517241	0.15	0.14	0.29	3.44828	16.9893	58.5838
Dox	13	L-R_hindlimbs	0.589744	0.22	0.17	0.39	2.5641	16.6046	42.576
Dox	13	L-R_hindlimbs	0.516129	0.14	0.17	0.31	3.22581	14.7004	47.4205
Dox	14	L-R_hindlimbs	0.52	0.12	0.13	0.25	4	16.9128	67.6512
Dox	14	L-R_hindlimbs	0.518519	0.12	0.15	0.27	3.7037	19.1153	70.7973
Dox	14	L-R_hindlimbs	0.727273	0.09	0.13	0.22	4.54545	22.3286	101.494
Dox	14	L-R_hindlimbs	0.695652	0.09	0.14	0.23	4.34783	21.5415	93.6585
Dox	14	L-R_hindlimbs	0.655172	0.15	0.14	0.29	3.44828	18.1597	62.6196
Dox	14	L-R_hindlimbs	0.642857	0.13	0.15	0.28	3.57143	19.9107	71.1097
Dox	14	L-R_hindlimbs	0.551724	0.13	0.16	0.29	3.44828	19.9899	68.9308
Dox	14	L-R_hindlimbs	0.5	0.08	0.14	0.22	4.54545	20.9573	95.2604
Dox	14	L-R_hindlimbs	0.555556	0.12	0.15	0.27	3.7037	17.7615	65.7834
Dox	14	L-R_hindlimbs	0.615385	0.13	0.13	0.26	3.84615	17.3398	66.6914
Dox	15	L-R_hindlimbs	0.652174	0.1	0.13	0.23	4.34783	19.1692	83.3445
Dox	15	L-R_hindlimbs	0.692308	0.1	0.16	0.26	3.84615	21.2211	81.6195
Dox	15	L-R_hindlimbs	0.944444	0.07	0.15	0.22	4.54545	27.39	124.5
Dox	15	L-R_hindlimbs	1	0.07	0.14	0.21	4.7619	26.3211	125.339
Dox	15	L-R_hindlimbs	1	0.06	0.13	0.19	5.26316	25.9655	136.66
Dox	15	L-R_hindlimbs	0.52	0.11	0.14	0.25	4	17.9933	71.9731
Dox	15	L-R_hindlimbs	0.625	0.11	0.13	0.24	4.16667	17.969	74.8708
Dox	15	L-R_hindlimbs	0.72	0.11	0.14	0.25	4	20.4804	81.9218
Dox	15	L-R_hindlimbs	0.681818	0.09	0.13	0.22	4.54545	15.6325	71.0567
Dox	15	L-R_hindlimbs	1	0.09	0.16	0.25	4	26.9142	107.657
Dox	16	L-R_hindlimbs	0.5	0.08	0.14	0.22	4.54545	21.1953	96.3421
Dox	16	L-R_hindlimbs	0.56	0.08	0.17	0.25	4	22.4647	89.8587
Dox	16	L-R_hindlimbs	0.583333	0.09	0.15	0.24	4.16667	21.2354	88.481
Dox	16	L-R_hindlimbs	0.72	0.1	0.15	0.25	4	18.2241	72.8962
Dox	16	L-R_hindlimbs	0.514286	0.2	0.15	0.35	2.85714	13.1139	37.4684
Dox	16	L-R_hindlimbs	0.514286	0.2	0.15	0.35	2.85714	14.6468	41.8481
Dox	16	L-R_hindlimbs	0.558824	0.17	0.17	0.34	2.94118	17.6593	51.9391
Dox	16	L-R_hindlimbs	0.586957	0.24	0.22	0.46	2.17391	13.0211	28.3067
Dox	16	L-R_hindlimbs	0.657143	0.18	0.17	0.35	2.85714	19.3807	55.3734
Dox	17	L-R_hindlimbs	0.583333	0.08	0.16	0.24	4.16667	21.0036	87.5148
Dox	17	L-R_hindlimbs	0.5	0.09	0.17	0.26	3.84615	22.5758	86.8301
Dox	17	L-R_hindlimbs	0.7	0.07	0.13	0.2	5	21.8969	109.485
Dox	17	L-R_hindlimbs	0.628571	0.19	0.16	0.35	2.85714	18.3524	52.4356
Dox	17	L-R_hindlimbs	0.5625	0.14	0.18	0.32	3.125	18.354	57.3561
Dox	17	L-R_hindlimbs	0.52381	0.07	0.14	0.21	4.7619	19.8394	94.4731
Dox	17	L-R_hindlimbs	0.607143	0.1	0.18	0.28	3.57143	20.1398	71.9278
Dox	17	L-R_hindlimbs	0.5	0.09	0.17	0.26	3.84615	21.5169	82.7573
Dox	18	L-R_hindlimbs	0.555556	0.12	0.15	0.27	3.7037	17.9009	66.2997
Dox	18	L-R_hindlimbs	0.541667	0.1	0.14	0.24	4.16667	19.6751	81.9798
Dox	18	L-R_hindlimbs	0.571429	0.08	0.13	0.21	4.7619	21.0192	100.091
Dox	18	L-R_hindlimbs	0.619048	0.07	0.14	0.21	4.7619	20.5152	97.6916
Dox	18	L-R_hindlimbs	0.526316	0.07	0.12	0.19	5.26316	18.0034	94.7548
Dox	18	L-R_hindlimbs	0.5	0.07	0.13	0.2	5	22.9739	114.87
Dox	18	L-R_hindlimbs	0.68	0.1	0.15	0.25	4	17.6951	70.7805
Dox	18	L-R_hindlimbs	0.636364	0.07	0.15	0.22	4.54545	19.2849	87.6588
Dox	18	L-R_hindlimbs	0.894737	0.06	0.13	0.19	5.26316	20.513	107.963
Dox	1	L-R_hindlimbs	0.515152	0.15	0.18	0.33	3.0303	20.4716	62.0351
Dox	1	L-R_hindlimbs	0.555556	0.11	0.16	0.27	3.7037	20.1064	74.4683
Dox	1	L-R_hindlimbs	0.5	0.17	0.19	0.36	2.77778	17.7523	49.3119
Dox	1	L-R_hindlimbs	0.55	0.2	0.2	0.4	2.5	18.758	46.8951
Dox	1	L-R_hindlimbs	0.555556	0.26	0.19	0.45	2.22222	16.2188	36.0419
Dox	1	L-R_hindlimbs	0.545455	0.18	0.15	0.33	3.0303	16.0531	48.6456
Dox	1	L-R_hindlimbs	0.53125	0.14	0.18	0.32	3.125	20.5861	64.3316
Dox	1	L-R_hindlimbs	0.533333	0.13	0.17	0.3	3.33333	20.8336	69.4452
Dox	2	L-R_hindlimbs	0.517241	0.14	0.15	0.29	3.44828	19.1231	65.9417
Dox	2	L-R_hindlimbs	0.607143	0.13	0.15	0.28	3.57143	17.9796	64.213
Dox	2	L-R_hindlimbs	0.52	0.09	0.16	0.25	4	19.3519	77.4075
Dox	2	L-R_hindlimbs	0.545455	0.14	0.19	0.33	3.0303	17.7058	53.654
Dox	2	L-R_hindlimbs	0.588235	0.15	0.19	0.34	2.94118	16.353	48.097
Dox	2	L-R_hindlimbs	0.527778	0.16	0.2	0.36	2.77778	19.8995	55.2765
Dox	2	L-R_hindlimbs	0.59375	0.14	0.18	0.32	3.125	17.0247	53.2021
Dox	2	L-R_hindlimbs	0.617647	0.18	0.16	0.34	2.94118	18.1502	53.3828
Dox	7	L-R_hindlimbs	0.5	0.1	0.16	0.26	3.84615	18.5551	71.3657
Dox	7	L-R_hindlimbs	0.575758	0.17	0.16	0.33	3.0303	14.1766	42.9593
Dox	7	L-R_hindlimbs	0.62069	0.15	0.14	0.29	3.44828	14.612	50.3863
Dox	7	L-R_hindlimbs	0.612903	0.13	0.18	0.31	3.22581	16.0627	51.8151
Dox	7	L-R_hindlimbs	0.604167	0.3	0.18	0.48	2.08333	16.6998	34.7912
Dox	7	L-R_hindlimbs	0.558824	0.17	0.17	0.34	2.94118	18.614	54.7471
Dox	7	L-R_hindlimbs	0.5	0.11	0.17	0.28	3.57143	19.5568	69.8458
Dox	7	L-R_hindlimbs	0.64	0.09	0.16	0.25	4	19.1127	76.4509
Dox	7	L-R_hindlimbs	0.68	0.08	0.17	0.25	4	23.4468	93.7874
Dox	7	L-R_hindlimbs	0.772727	0.09	0.13	0.22	4.54545	17.281	78.5498
Dox	8	L-R_hindlimbs	0.533333	0.13	0.17	0.3	3.33333	18.4295	61.4317
Dox	8	L-R_hindlimbs	0.548387	0.13	0.18	0.31	3.22581	21.0644	67.9496
Dox	8	L-R_hindlimbs	0.576923	0.1	0.16	0.26	3.84615	20.1803	77.6167
Dox	8	L-R_hindlimbs	0.517241	0.14	0.15	0.29	3.44828	18.1087	62.4437
Dox	8	L-R_hindlimbs	0.515152	0.14	0.19	0.33	3.0303	16.5761	50.2306
Dox	8	L-R_hindlimbs	0.607143	0.13	0.15	0.28	3.57143	18.5982	66.4223
Dox	8	L-R_hindlimbs	0.68	0.1	0.15	0.25	4	18.569	74.2761
Dox	8	L-R_hindlimbs	0.64	0.1	0.15	0.25	4	19.5058	78.0231
Dox	8	L-R_hindlimbs	0.681818	0.08	0.14	0.22	4.54545	19.5095	88.6795
Dox	9	L-R_hindlimbs	0.52	0.08	0.17	0.25	4	24.3961	97.5842
Dox	9	L-R_hindlimbs	0.695652	0.11	0.12	0.23	4.34783	19.2879	83.8606
Dox	9	L-R_hindlimbs	0.85	0.07	0.13	0.2	5	25.3664	126.832
Dox	9	L-R_hindlimbs	0.517241	0.14	0.15	0.29	3.44828	13.8972	47.9212
Dox	9	L-R_hindlimbs	0.761905	0.07	0.14	0.21	4.7619	23.6538	112.637
Dox	9	L-R_hindlimbs	0.645161	0.16	0.15	0.31	3.22581	19.5425	63.0402
Dox	9	L-R_hindlimbs	0.521739	0.1	0.13	0.23	4.34783	18.6508	81.0904
Dox	9	L-R_hindlimbs	0.548387	0.17	0.14	0.31	3.22581	15.3995	49.676
Dox	9	L-R_hindlimbs	0.95	0.08	0.12	0.2	5	21.5138	107.569
Dox	9	L-R_hindlimbs	0.526316	0.18	0.2	0.38	2.63158	16.1067	42.3861
Dox	10	L-R_hindlimbs	0.727273	0.07	0.15	0.22	4.54545	21.697	98.6226
Dox	10	L-R_hindlimbs	0.85	0.1	0.1	0.2	5	13.7901	68.9506
Dox	10	L-R_hindlimbs	0.85	0.09	0.11	0.2	5	18.186	90.93
Dox	10	L-R_hindlimbs	0.916667	0.11	0.13	0.24	4.16667	19.6187	81.7447
Dox	10	L-R_hindlimbs	0.723404	0.32	0.15	0.47	2.12766	16.068	34.1873
Dox	10	L-R_hindlimbs	0.888889	0.07	0.11	0.18	5.55556	25.8988	143.882
Dox	10	L-R_hindlimbs	1	0.08	0.12	0.2	5	27.7273	138.636
Dox	10	L-R_hindlimbs	1	0.06	0.12	0.18	5.55556	23.7334	131.852
Dox	10	L-R_hindlimbs	0.791667	0.1	0.14	0.24	4.16667	16.7312	69.7133
Dox	10	L-R_hindlimbs	0.766667	0.18	0.12	0.3	3.33333	14.1921	47.3069
Dox	12	L-R_hindlimbs	0.586207	0.15	0.14	0.29	3.44828	15.5288	53.5476
Dox	12	L-R_hindlimbs	0.538462	0.11	0.15	0.26	3.84615	20.4666	78.7176
Dox	12	L-R_hindlimbs	0.5	0.11	0.15	0.26	3.84615	20.8251	80.0964
Dox	12	L-R_hindlimbs	0.521739	0.09	0.14	0.23	4.34783	21.419	93.1262
Dox	12	L-R_hindlimbs	0.545455	0.08	0.14	0.22	4.54545	20.8181	94.6276
Dox	12	L-R_hindlimbs	0.6	0.1	0.15	0.25	4	19.4533	77.8133
Dox	12	L-R_hindlimbs	0.652174	0.09	0.14	0.23	4.34783	24.0944	104.758
Dox	12	L-R_hindlimbs	0.761905	0.08	0.13	0.21	4.7619	22.4912	107.101
Dox	12	L-R_hindlimbs	0.541667	0.07	0.17	0.24	4.16667	23.7598	98.9993
Dox	13	L-R_hindlimbs	0.535714	0.11	0.17	0.28	3.57143	23.9871	85.6683
Dox	13	L-R_hindlimbs	0.5	0.12	0.16	0.28	3.57143	22.0524	78.7586
Dox	13	L-R_hindlimbs	0.527778	0.2	0.16	0.36	2.77778	16.8331	46.7586
Dox	13	L-R_hindlimbs	0.515152	0.16	0.17	0.33	3.0303	21.2999	64.5452
Dox	13	L-R_hindlimbs	0.535714	0.12	0.16	0.28	3.57143	21.3539	76.2638
Dox	13	L-R_hindlimbs	0.5	0.13	0.15	0.28	3.57143	21.2958	76.0565
Dox	13	L-R_hindlimbs	0.518519	0.1	0.17	0.27	3.7037	21.7625	80.6018
Dox	13	L-R_hindlimbs	0.533333	0.24	0.21	0.45	2.22222	17.598	39.1068
Dox	13	L-R_hindlimbs	0.513514	0.2	0.17	0.37	2.7027	18.0329	48.7376
Dox	13	L-R_hindlimbs	0.5	0.1	0.18	0.28	3.57143	23.2448	83.0172
Dox	14	L-R_hindlimbs	0.571429	0.15	0.13	0.28	3.57143	16.5082	58.9578
Dox	14	L-R_hindlimbs	0.545455	0.17	0.16	0.33	3.0303	17.2366	52.232
Dox	14	L-R_hindlimbs	0.535714	0.14	0.14	0.28	3.57143	16.7398	59.7849
Dox	14	L-R_hindlimbs	0.571429	0.12	0.16	0.28	3.57143	19.8104	70.7514
Dox	14	L-R_hindlimbs	0.551724	0.13	0.16	0.29	3.44828	20.103	69.3207
Dox	14	L-R_hindlimbs	0.533333	0.12	0.18	0.3	3.33333	17.6913	58.9711
Dox	14	L-R_hindlimbs	0.62963	0.13	0.14	0.27	3.7037	18.904	70.0149
Dox	14	L-R_hindlimbs	0.6	0.15	0.15	0.3	3.33333	18.7485	62.4952
Dox	14	L-R_hindlimbs	0.52381	0.25	0.17	0.42	2.38095	13.0522	31.0767
Dox	14	L-R_hindlimbs	0.583333	0.31	0.17	0.48	2.08333	15.5389	32.3727
Dox	15	L-R_hindlimbs	0.586207	0.13	0.16	0.29	3.44828	19.9441	68.7726
Dox	15	L-R_hindlimbs	0.515152	0.17	0.16	0.33	3.0303	19.1466	58.0199
Dox	15	L-R_hindlimbs	0.761905	0.08	0.13	0.21	4.7619	19.2912	91.863
Dox	15	L-R_hindlimbs	0.5625	0.16	0.16	0.32	3.125	19.8177	61.9304
Dox	15	L-R_hindlimbs	0.761905	0.08	0.13	0.21	4.7619	21.7566	103.603
Dox	15	L-R_hindlimbs	0.85	0.08	0.12	0.2	5	19.4604	97.3021
Dox	15	L-R_hindlimbs	0.529412	0.16	0.18	0.34	2.94118	18.9456	55.7223
Dox	15	L-R_hindlimbs	0.5	0.13	0.19	0.32	3.125	21.1215	66.0046
Dox	16	L-R_hindlimbs	0.551724	0.13	0.16	0.29	3.44828	16.667	57.4725
Dox	16	L-R_hindlimbs	0.514286	0.17	0.18	0.35	2.85714	17.9365	51.2472
Dox	16	L-R_hindlimbs	0.5	0.12	0.16	0.28	3.57143	20.6291	73.6754
Dox	16	L-R_hindlimbs	0.518519	0.12	0.15	0.27	3.7037	18.9663	70.2455
Dox	16	L-R_hindlimbs	0.59375	0.14	0.18	0.32	3.125	18.6657	58.3302
Dox	16	L-R_hindlimbs	0.5625	0.13	0.19	0.32	3.125	19.5853	61.2041
Dox	16	L-R_hindlimbs	0.590909	0.08	0.14	0.22	4.54545	19.3884	88.1291
Dox	16	L-R_hindlimbs	0.7	0.1	0.2	0.3	3.33333	20.6939	68.9795
Dox	16	L-R_hindlimbs	0.714286	0.15	0.13	0.28	3.57143	13.2277	47.2417
Dox	17	L-R_hindlimbs	0.558824	0.15	0.19	0.34	2.94118	20.6742	60.8064
Dox	17	L-R_hindlimbs	0.545455	0.13	0.2	0.33	3.0303	19.5053	59.1069
Dox	17	L-R_hindlimbs	0.657143	0.13	0.22	0.35	2.85714	16.5842	47.3834
Dox	17	L-R_hindlimbs	0.548387	0.11	0.2	0.31	3.22581	18.4982	59.6717
Dox	17	L-R_hindlimbs	0.517241	0.12	0.17	0.29	3.44828	20.4495	70.5156
Dox	17	L-R_hindlimbs	0.551724	0.12	0.17	0.29	3.44828	19.3812	66.8316
Dox	17	L-R_hindlimbs	0.517241	0.09	0.2	0.29	3.44828	22.5835	77.8743
Dox	17	L-R_hindlimbs	0.594595	0.19	0.18	0.37	2.7027	16.2924	44.0334
Dox	17	L-R_hindlimbs	0.586207	0.11	0.18	0.29	3.44828	19.0606	65.7261
Dox	18	L-R_hindlimbs	0.538462	0.11	0.15	0.26	3.84615	19.0634	73.3207
Dox	18	L-R_hindlimbs	0.517241	0.12	0.17	0.29	3.44828	19.5211	67.3143
Dox	18	L-R_hindlimbs	0.714286	0.08	0.13	0.21	4.7619	20.1023	95.7254
Dox	18	L-R_hindlimbs	0.695652	0.08	0.15	0.23	4.34783	18.8363	81.8971
Dox	18	L-R_hindlimbs	0.548387	0.16	0.15	0.31	3.22581	17.3662	56.0198
Dox	18	L-R_hindlimbs	0.5625	0.16	0.16	0.32	3.125	18.5493	57.9664
Dox	18	L-R_hindlimbs	0.75	0.07	0.13	0.2	5	22.5571	112.786
Dox	18	L-R_hindlimbs	0.541667	0.1	0.14	0.24	4.16667	19.5825	81.5937
Dox	18	L-R_hindlimbs	0.68	0.11	0.14	0.25	4	19.5343	78.1373
Dox	18	L-R_hindlimbs	0.708333	0.09	0.15	0.24	4.16667	16.9472	70.6133
Dox	1	L-R_hindlimbs	0.522727	0.24	0.2	0.44	2.27273	15.2435	34.6444
Dox	1	L-R_hindlimbs	0.540541	0.2	0.17	0.37	2.7027	16.6892	45.1059
Dox	1	L-R_hindlimbs	0.5	0.12	0.16	0.28	3.57143	19.8571	70.9183
Dox	1	L-R_hindlimbs	0.525	0.22	0.18	0.4	2.5	17.269	43.1725
Dox	1	L-R_hindlimbs	0.516129	0.13	0.18	0.31	3.22581	19.6652	63.4361
Dox	1	L-R_hindlimbs	0.568182	0.26	0.18	0.44	2.27273	13.5707	30.8424
Dox	1	L-R_hindlimbs	0.555556	0.11	0.16	0.27	3.7037	17.6768	65.4698
Dox	1	L-R_hindlimbs	0.517241	0.11	0.18	0.29	3.44828	20.8966	72.0572
Dox	2	L-R_hindlimbs	0.5	0.13	0.17	0.3	3.33333	22.11	73.6999
Dox	2	L-R_hindlimbs	0.574468	0.29	0.18	0.47	2.12766	12.5406	26.6822
Dox	2	L-R_hindlimbs	0.533333	0.13	0.17	0.3	3.33333	18.7864	62.6212
Dox	2	L-R_hindlimbs	0.513514	0.18	0.19	0.37	2.7027	16.9012	45.6789
Dox	2	L-R_hindlimbs	0.516129	0.15	0.16	0.31	3.22581	18.6095	60.0305
Dox	2	L-R_hindlimbs	0.571429	0.13	0.15	0.28	3.57143	17.1043	61.0869
Dox	2	L-R_hindlimbs	0.521739	0.08	0.15	0.23	4.34783	18.7372	81.4662
Dox	2	L-R_hindlimbs	0.518519	0.12	0.15	0.27	3.7037	20.3286	75.2912
Dox	7	L-R_hindlimbs	0.59375	0.15	0.17	0.32	3.125	17.5104	54.7201
Dox	7	L-R_hindlimbs	0.5	0.19	0.19	0.38	2.63158	18.0613	47.5298
Dox	7	L-R_hindlimbs	0.586207	0.12	0.17	0.29	3.44828	17.7994	61.3772
Dox	7	L-R_hindlimbs	0.566667	0.13	0.17	0.3	3.33333	17.161	57.2035
Dox	7	L-R_hindlimbs	0.535714	0.1	0.18	0.28	3.57143	21.2772	75.99
Dox	7	L-R_hindlimbs	0.576923	0.1	0.16	0.26	3.84615	18.808	72.3385
Dox	7	L-R_hindlimbs	0.548387	0.14	0.17	0.31	3.22581	19.2733	62.1718
Dox	7	L-R_hindlimbs	0.576923	0.09	0.17	0.26	3.84615	22.3409	85.9266
Dox	7	L-R_hindlimbs	0.590909	0.09	0.13	0.22	4.54545	18.0836	82.1983
Dox	7	L-R_hindlimbs	0.586207	0.12	0.17	0.29	3.44828	18.5804	64.0702
Dox	8	L-R_hindlimbs	0.642857	0.12	0.16	0.28	3.57143	19.2972	68.9187
Dox	8	L-R_hindlimbs	0.653846	0.11	0.15	0.26	3.84615	18.4072	70.797
Dox	8	L-R_hindlimbs	0.6	0.11	0.14	0.25	4	21.5288	86.1151
Dox	8	L-R_hindlimbs	0.514286	0.16	0.19	0.35	2.85714	17.0606	48.7446
Dox	8	L-R_hindlimbs	0.538462	0.11	0.15	0.26	3.84615	20.2736	77.9754
Dox	8	L-R_hindlimbs	0.64	0.11	0.14	0.25	4	18.0917	72.3669
Dox	8	L-R_hindlimbs	0.615385	0.12	0.14	0.26	3.84615	19.9285	76.6479
Dox	9	L-R_hindlimbs	0.5	0.1	0.14	0.24	4.16667	18.5906	77.4608
Dox	9	L-R_hindlimbs	0.625	0.11	0.13	0.24	4.16667	14.3499	59.7913
Dox	9	L-R_hindlimbs	1	0.06	0.13	0.19	5.26316	27.0357	142.293
Dox	9	L-R_hindlimbs	1	0.06	0.1	0.16	6.25	22.8475	142.797
Dox	9	L-R_hindlimbs	0.62963	0.13	0.14	0.27	3.7037	16.2749	60.2773
Dox	9	L-R_hindlimbs	0.941176	0.07	0.1	0.17	5.88235	19.1664	112.744
Dox	9	L-R_hindlimbs	0.857143	0.08	0.13	0.21	4.7619	19.5936	93.3028
Dox	9	L-R_hindlimbs	0.5	0.23	0.15	0.38	2.63158	13.2556	34.8831
Dox	9	L-R_hindlimbs	0.606061	0.17	0.16	0.33	3.0303	13.295	40.288
Dox	9	L-R_hindlimbs	0.789474	0.08	0.11	0.19	5.26316	18.1008	95.2674
Dox	10	L-R_hindlimbs	0.571429	0.1	0.18	0.28	3.57143	17.0604	60.93
Dox	10	L-R_hindlimbs	0.52381	0.25	0.17	0.42	2.38095	15.1974	36.1843
Dox	10	L-R_hindlimbs	0.772727	0.09	0.13	0.22	4.54545	24.0972	109.533
Dox	10	L-R_hindlimbs	0.789474	0.07	0.12	0.19	5.26316	21.2009	111.584
Dox	10	L-R_hindlimbs	0.888889	0.07	0.11	0.18	5.55556	25.0991	139.439
Dox	10	L-R_hindlimbs	0.947368	0.06	0.13	0.19	5.26316	24.7146	130.077
Dox	10	L-R_hindlimbs	0.857143	0.08	0.13	0.21	4.7619	15.9781	76.0861
Dox	10	L-R_hindlimbs	0.857143	0.08	0.13	0.21	4.7619	24.3524	115.964
Dox	10	L-R_hindlimbs	1	0.07	0.12	0.19	5.26316	25.2735	133.018
Dox	10	L-R_hindlimbs	0.944444	0.08	0.12	0.2	5	24.7091	123.545
Dox	12	L-R_hindlimbs	0.625	0.1	0.14	0.24	4.16667	17.6893	73.7053
Dox	12	L-R_hindlimbs	0.714286	0.08	0.13	0.21	4.7619	19.5402	93.0488
Dox	12	L-R_hindlimbs	0.730769	0.13	0.13	0.26	3.84615	15.1656	58.3291
Dox	12	L-R_hindlimbs	0.833333	0.11	0.13	0.24	4.16667	17.2951	72.0628
Dox	12	L-R_hindlimbs	0.952381	0.1	0.11	0.21	4.7619	15.8899	75.666
Dox	12	L-R_hindlimbs	0.619048	0.09	0.12	0.21	4.7619	18.6675	88.8927
Dox	12	L-R_hindlimbs	0.85	0.08	0.12	0.2	5	19.3855	96.9273
Dox	12	L-R_hindlimbs	0.695652	0.1	0.13	0.23	4.34783	17.7437	77.1463
Dox	12	L-R_hindlimbs	0.791667	0.08	0.16	0.24	4.16667	22.4291	93.4548
Dox	12	L-R_hindlimbs	0.85	0.07	0.13	0.2	5	18.635	93.1748
Dox	12	L-R_hindlimbs	0.714286	0.08	0.13	0.21	4.7619	19.5402	93.0488
Dox	13	L-R_hindlimbs	0.535714	0.13	0.15	0.28	3.57143	17.6312	62.9685
Dox	13	L-R_hindlimbs	0.516129	0.14	0.17	0.31	3.22581	18.136	58.5031
Dox	13	L-R_hindlimbs	0.541667	0.11	0.13	0.24	4.16667	18.9798	79.0823
Dox	13	L-R_hindlimbs	0.538462	0.11	0.15	0.26	3.84615	18.4732	71.0506
Dox	13	L-R_hindlimbs	0.727273	0.09	0.13	0.22	4.54545	18.1728	82.6035
Dox	13	L-R_hindlimbs	0.761905	0.09	0.12	0.21	4.7619	21.0003	100.002
Dox	13	L-R_hindlimbs	0.952381	0.1	0.11	0.21	4.7619	16.794	79.9715
Dox	13	L-R_hindlimbs	0.772727	0.1	0.12	0.22	4.54545	17.2938	78.6081
Dox	13	L-R_hindlimbs	0.75	0.1	0.14	0.24	4.16667	14.6763	61.1512
Dox	13	L-R_hindlimbs	0.76	0.13	0.12	0.25	4	15.8341	63.3364
Dox	14	L-R_hindlimbs	0.576923	0.11	0.15	0.26	3.84615	20.3395	78.2287
Dox	14	L-R_hindlimbs	0.652174	0.09	0.14	0.23	4.34783	21.2792	92.5182
Dox	14	L-R_hindlimbs	0.652174	0.1	0.13	0.23	4.34783	19.4539	84.5823
Dox	14	L-R_hindlimbs	0.652174	0.1	0.13	0.23	4.34783	18.2615	79.398
Dox	14	L-R_hindlimbs	0.857143	0.09	0.12	0.21	4.7619	20.1805	96.0976
Dox	14	L-R_hindlimbs	0.761905	0.07	0.14	0.21	4.7619	21.9177	104.37
Dox	14	L-R_hindlimbs	0.545455	0.1	0.12	0.22	4.54545	17.3864	79.0292
Dox	14	L-R_hindlimbs	0.583333	0.1	0.14	0.24	4.16667	21.351	88.9624
Dox	14	L-R_hindlimbs	0.85	0.07	0.13	0.2	5	22.816	114.08
Dox	15	L-R_hindlimbs	0.652174	0.1	0.13	0.23	4.34783	18.809	81.7783
Dox	15	L-R_hindlimbs	0.535714	0.1	0.18	0.28	3.57143	23.5105	83.966
Dox	15	L-R_hindlimbs	0.75	0.07	0.13	0.2	5	21.1838	105.919
Dox	15	L-R_hindlimbs	1	0.07	0.14	0.21	4.7619	26.7964	127.602
Dox	15	L-R_hindlimbs	0.947368	0.06	0.13	0.19	5.26316	27.0609	142.426
Dox	15	L-R_hindlimbs	0.941176	0.06	0.11	0.17	5.88235	21.0367	123.745
Dox	15	L-R_hindlimbs	0.95	0.06	0.14	0.2	5	27.8026	139.013
Dox	15	L-R_hindlimbs	1	0.07	0.13	0.2	5	26.193	130.965
Dox	15	L-R_hindlimbs	1	0.07	0.11	0.18	5.55556	22.0331	122.406
Dox	15	L-R_hindlimbs	0.517241	0.14	0.15	0.29	3.44828	16.4071	56.5762
Dox	16	L-R_hindlimbs	0.64	0.09	0.16	0.25	4	17.8525	71.4099
Dox	16	L-R_hindlimbs	0.666667	0.09	0.15	0.24	4.16667	19.0496	79.3732
Dox	16	L-R_hindlimbs	0.571429	0.12	0.16	0.28	3.57143	19.8659	70.9497
Dox	16	L-R_hindlimbs	0.6	0.1	0.15	0.25	4	18.5038	74.0152
Dox	16	L-R_hindlimbs	0.541667	0.09	0.15	0.24	4.16667	22.8437	95.1821
Dox	16	L-R_hindlimbs	0.608696	0.09	0.14	0.23	4.34783	20.8111	90.4831
Dox	16	L-R_hindlimbs	0.571429	0.12	0.16	0.28	3.57143	16.3214	58.2908
Dox	16	L-R_hindlimbs	0.515152	0.14	0.19	0.33	3.0303	19.9249	60.3784
Dox	16	L-R_hindlimbs	0.52	0.1	0.15	0.25	4	19.9761	79.9044
Dox	17	L-R_hindlimbs	0.517241	0.12	0.17	0.29	3.44828	21.5729	74.3892
Dox	17	L-R_hindlimbs	0.833333	0.06	0.12	0.18	5.55556	23.2012	128.896
Dox	17	L-R_hindlimbs	0.533333	0.12	0.18	0.3	3.33333	19.1903	63.9677
Dox	17	L-R_hindlimbs	0.586207	0.13	0.16	0.29	3.44828	17.4773	60.2667
Dox	17	L-R_hindlimbs	0.625	0.08	0.16	0.24	4.16667	23.1481	96.4506
Dox	17	L-R_hindlimbs	0.551724	0.11	0.18	0.29	3.44828	18.3151	63.1555
Dox	17	L-R_hindlimbs	0.555556	0.11	0.16	0.27	3.7037	21.2104	78.5569
Dox	17	L-R_hindlimbs	0.571429	0.13	0.15	0.28	3.57143	20.0647	71.6596
Dox	17	L-R_hindlimbs	0.538462	0.08	0.18	0.26	3.84615	21.7411	83.6197
Dox	17	L-R_hindlimbs	0.52381	0.07	0.14	0.21	4.7619	21.7405	103.526
Dox	18	L-R_hindlimbs	0.586207	0.14	0.15	0.29	3.44828	19.8305	68.3812
Dox	18	L-R_hindlimbs	0.517241	0.12	0.17	0.29	3.44828	20.9141	72.1174
Dox	18	L-R_hindlimbs	0.75	0.07	0.13	0.2	5	23.3715	116.857
Dox	18	L-R_hindlimbs	0.904762	0.08	0.13	0.21	4.7619	17.3174	82.4636
Dox	18	L-R_hindlimbs	0.789474	0.06	0.13	0.19	5.26316	22.5295	118.576
Dox	18	L-R_hindlimbs	1	0.06	0.1	0.16	6.25	18.8811	118.007
Dox	18	L-R_hindlimbs	1	0.07	0.14	0.21	6.25	23.7112	112.911
Dox	18	L-R_hindlimbs	0.5	0.09	0.13	0.22	6.25	22.9662	104.392
