# Supplementary material for: Long ascending propriospinal neurons provide flexible, context-specific control of interlimb coordination
Source: eLife. 2020 Sep 9;9:e53565. doi: 10.7554/eLife.53565 (PMC7527236; doi:10.7554/eLife.53565)
Supplement: Figure 5—source data 1. [file elife-53565-fig5-data1.xlsx]

## Sheet: RawData
Time_ID	Animal_ID	Limb_ID	rawPhase	transPhase			Time_ID	Animal_ID	Limb_ID	rawPhase	transPhase
Con	1	L-R_forelimb	0.470588	0.529412			Dox	1	L-R_forelimb	0.483871	0.516129
Con	1	L-R_forelimb	0.470588	0.529412			Dox	1	L-R_forelimb	0.481481	0.518519
Con	1	L-R_forelimb	0.514286	0.514286			Dox	1	L-R_forelimb	0.5	0.5
Con	1	L-R_forelimb	0.5	0.5			Dox	1	L-R_forelimb	0.461538	0.538462
Con	1	L-R_forelimb	0.425	0.575			Dox	2	L-R_forelimb	0.444444	0.555556
Con	1	L-R_forelimb	0.517241	0.517241			Dox	2	L-R_forelimb	0.484848	0.515152
Con	1	L-R_forelimb	0.481481	0.518519			Dox	2	L-R_forelimb	0.4375	0.5625
Con	1	L-R_forelimb	0.515152	0.515152			Dox	2	L-R_forelimb	0.435897	0.564103
Con	1	L-R_forelimb	0.558824	0.558824			Dox	2	L-R_forelimb	0.5	0.5
Con	2	L-R_forelimb	0.545455	0.545455			Dox	2	L-R_forelimb	0.431818	0.568182
Con	2	L-R_forelimb	0.5	0.5			Dox	2	L-R_forelimb	0.378378	0.621622
Con	2	L-R_forelimb	0.515152	0.515152			Dox	2	L-R_forelimb	0.5	0.5
Con	2	L-R_forelimb	0.516129	0.516129			Dox	2	L-R_forelimb	0.342105	0.657895
Con	2	L-R_forelimb	0.517241	0.517241			Dox	2	L-R_forelimb	0.463415	0.536585
Con	2	L-R_forelimb	0.5	0.5			Dox	7	L-R_forelimb	0.488372	0.511628
Con	2	L-R_forelimb	0.529412	0.529412			Dox	7	L-R_forelimb	0.487179	0.512821
Con	7	L-R_forelimb	0.485714	0.514286			Dox	7	L-R_forelimb	0.451613	0.548387
Con	7	L-R_forelimb	0.517241	0.517241			Dox	7	L-R_forelimb	0.422222	0.577778
Con	7	L-R_forelimb	0.482759	0.517241			Dox	7	L-R_forelimb	0.487805	0.512195
Con	7	L-R_forelimb	0.560976	0.560976			Dox	7	L-R_forelimb	0.428571	0.571429
Con	8	L-R_forelimb	0.548387	0.548387			Dox	7	L-R_forelimb	0.37037	0.62963
Con	8	L-R_forelimb	0.325581	0.674419			Dox	7	L-R_forelimb	0.410256	0.589744
Con	8	L-R_forelimb	0.566667	0.566667			Dox	7	L-R_forelimb	0.413793	0.586207
Con	8	L-R_forelimb	0.416667	0.583333			Dox	7	L-R_forelimb	0.442308	0.557692
Con	8	L-R_forelimb	0.606061	0.606061			Dox	7	L-R_forelimb	0.435897	0.564103
Con	8	L-R_forelimb	0.555556	0.555556			Dox	7	L-R_forelimb	0.484848	0.515152
Con	8	L-R_forelimb	0.5	0.5			Dox	7	L-R_forelimb	0.387097	0.612903
Con	8	L-R_forelimb	0.466667	0.533333			Dox	7	L-R_forelimb	0.448276	0.551724
Con	8	L-R_forelimb	0.548387	0.548387			Dox	7	L-R_forelimb	0.363636	0.636364
Con	8	L-R_forelimb	0.5	0.5			Dox	8	L-R_forelimb	0.5	0.5
Con	8	L-R_forelimb	0.566667	0.566667			Dox	8	L-R_forelimb	0.428571	0.571429
Con	9	L-R_forelimb	0.521739	0.521739			Dox	8	L-R_forelimb	0.388889	0.611111
Con	9	L-R_forelimb	0.464286	0.535714			Dox	8	L-R_forelimb	0.459459	0.540541
Con	9	L-R_forelimb	0.416667	0.583333			Dox	8	L-R_forelimb	0.484848	0.515152
Con	9	L-R_forelimb	0.555556	0.555556			Dox	9	L-R_forelimb	0.388889	0.611111
Con	9	L-R_forelimb	0.527778	0.527778			Dox	9	L-R_forelimb	0.393939	0.606061
Con	9	L-R_forelimb	0.5	0.5			Dox	9	L-R_forelimb	0.454545	0.545455
Con	9	L-R_forelimb	0.5625	0.5625			Dox	10	L-R_forelimb	0.5	0.5
Con	9	L-R_forelimb	0.483871	0.516129			Dox	10	L-R_forelimb	0.5	0.5
Con	9	L-R_forelimb	0.482759	0.517241			Dox	10	L-R_forelimb	0.451613	0.548387
Con	10	L-R_forelimb	0.52	0.52			Dox	10	L-R_forelimb	0.425	0.575
Con	10	L-R_forelimb	0.5	0.5			Dox	10	L-R_forelimb	0.470588	0.529412
Con	10	L-R_forelimb	0.454545	0.545455			Dox	10	L-R_forelimb	0.4	0.6
Con	10	L-R_forelimb	0.5	0.5			Dox	10	L-R_forelimb	0.361702	0.638298
Con	10	L-R_forelimb	0.448276	0.551724			Dox	12	L-R_forelimb	0.478261	0.521739
Con	12	L-R_forelimb	0.483871	0.516129			Dox	12	L-R_forelimb	0.454545	0.545455
Con	12	L-R_forelimb	0.482759	0.517241			Dox	12	L-R_forelimb	0.487179	0.512821
Con	12	L-R_forelimb	0.448276	0.551724			Dox	12	L-R_forelimb	0.478261	0.521739
Con	12	L-R_forelimb	0.405405	0.594595			Dox	12	L-R_forelimb	0.461538	0.538462
Con	12	L-R_forelimb	0.5	0.5			Dox	12	L-R_forelimb	0.411765	0.588235
Con	12	L-R_forelimb	0.482759	0.517241			Dox	12	L-R_forelimb	0.470588	0.529412
Con	12	L-R_forelimb	0.44	0.56			Dox	12	L-R_forelimb	0.387097	0.612903
Con	12	L-R_forelimb	0.464286	0.535714			Dox	12	L-R_forelimb	0.416667	0.583333
Con	12	L-R_forelimb	0.535714	0.535714			Dox	13	L-R_forelimb	0.483871	0.516129
Con	12	L-R_forelimb	0.44	0.56			Dox	13	L-R_forelimb	0.44	0.56
Con	12	L-R_forelimb	0.521739	0.521739			Dox	13	L-R_forelimb	0.481481	0.518519
Con	12	L-R_forelimb	0.409091	0.590909			Dox	13	L-R_forelimb	0.464286	0.535714
Con	12	L-R_forelimb	0.541667	0.541667			Dox	14	L-R_forelimb	0.466667	0.533333
Con	12	L-R_forelimb	0.515152	0.515152			Dox	14	L-R_forelimb	0.428571	0.571429
Con	13	L-R_forelimb	0.451613	0.548387			Dox	14	L-R_forelimb	0.478261	0.521739
Con	13	L-R_forelimb	0.5	0.5			Dox	14	L-R_forelimb	0.4375	0.5625
Con	13	L-R_forelimb	0.487805	0.512195			Dox	14	L-R_forelimb	0.428571	0.571429
Con	14	L-R_forelimb	0.464286	0.535714			Dox	14	L-R_forelimb	0.483871	0.516129
Con	14	L-R_forelimb	0.5	0.5			Dox	14	L-R_forelimb	0.490196	0.509804
Con	14	L-R_forelimb	0.444444	0.555556			Dox	14	L-R_forelimb	0.45	0.55
Con	14	L-R_forelimb	0.458333	0.541667			Dox	14	L-R_forelimb	0.487805	0.512195
Con	14	L-R_forelimb	0.5	0.5			Dox	15	L-R_forelimb	0.4375	0.5625
Con	14	L-R_forelimb	0.484848	0.515152			Dox	15	L-R_forelimb	0.28125	0.71875
Con	14	L-R_forelimb	0.5	0.5			Dox	15	L-R_forelimb	0.485714	0.514286
Con	14	L-R_forelimb	0.5	0.5			Dox	15	L-R_forelimb	0.428571	0.571429
Con	14	L-R_forelimb	0.451613	0.548387			Dox	16	L-R_forelimb	0.481481	0.518519
Con	14	L-R_forelimb	0.5	0.5			Dox	16	L-R_forelimb	0.478261	0.521739
Con	15	L-R_forelimb	0.47619	0.52381			Dox	16	L-R_forelimb	0.418605	0.581395
Con	15	L-R_forelimb	0.533333	0.533333			Dox	16	L-R_forelimb	0.466667	0.533333
Con	15	L-R_forelimb	0.525	0.525			Dox	16	L-R_forelimb	0.461538	0.538462
Con	15	L-R_forelimb	0.529412	0.529412			Dox	16	L-R_forelimb	0.478261	0.521739
Con	15	L-R_forelimb	0.55	0.55			Dox	16	L-R_forelimb	0.5	0.5
Con	16	L-R_forelimb	0.481481	0.518519			Dox	16	L-R_forelimb	0.5	0.5
Con	16	L-R_forelimb	0.538462	0.538462			Dox	16	L-R_forelimb	0.46875	0.53125
Con	16	L-R_forelimb	0.52381	0.52381			Dox	16	L-R_forelimb	0.454545	0.545455
Con	16	L-R_forelimb	0.458333	0.541667			Dox	16	L-R_forelimb	0.5	0.5
Con	16	L-R_forelimb	0.515152	0.515152			Dox	16	L-R_forelimb	0.5	0.5
Con	16	L-R_forelimb	0.538462	0.538462			Dox	16	L-R_forelimb	0.5	0.5
Con	16	L-R_forelimb	0.470588	0.529412			Dox	16	L-R_forelimb	0.464286	0.535714
Con	17	L-R_forelimb	0.487179	0.512821			Dox	16	L-R_forelimb	0.407407	0.592593
Con	17	L-R_forelimb	0.484848	0.515152			Dox	16	L-R_forelimb	0.416667	0.583333
Con	18	L-R_forelimb	0.411765	0.588235			Dox	17	L-R_forelimb	0.464286	0.535714
Con	18	L-R_forelimb	0.424242	0.575758			Dox	17	L-R_forelimb	0.461538	0.538462
Con	18	L-R_forelimb	0.516129	0.516129			Dox	17	L-R_forelimb	0.484848	0.515152
Con	18	L-R_forelimb	0.448276	0.551724			Dox	17	L-R_forelimb	0.5	0.5
Con	18	L-R_forelimb	0.454545	0.545455			Dox	18	L-R_forelimb	0.411765	0.588235
Con	18	L-R_forelimb	0.6	0.6			Dox	18	L-R_forelimb	0.447368	0.552632
Con	18	L-R_forelimb	0.470588	0.529412			Dox	18	L-R_forelimb	0.40625	0.59375
Con	18	L-R_forelimb	0.44	0.56			Dox	18	L-R_forelimb	0.473684	0.526316
Con	18	L-R_forelimb	0.5625	0.5625			Dox	18	L-R_forelimb	0.382353	0.617647
Con	18	L-R_forelimb	0.5	0.5			Dox	1	L-R_hindlimb	0.5	0.5
Con	18	L-R_forelimb	0.545455	0.545455			Dox	1	L-R_hindlimb	0.482759	0.517241
Con	18	L-R_forelimb	0.485714	0.514286			Dox	1	L-R_hindlimb	0.477273	0.522727
Con	18	L-R_forelimb	0.5	0.5			Dox	1	L-R_hindlimb	0.444444	0.555556
Con	18	L-R_forelimb	0.574468	0.574468			Dox	2	L-R_hindlimb	0.428571	0.571429
Con	1	L-R_hindlimb	0.470588	0.529412			Dox	2	L-R_hindlimb	0.428571	0.571429
Con	1	L-R_hindlimb	0.454545	0.545455			Dox	2	L-R_hindlimb	0.472222	0.527778
Con	1	L-R_hindlimb	0.5	0.5			Dox	2	L-R_hindlimb	0.487805	0.512195
Con	1	L-R_hindlimb	0.432432	0.567568			Dox	2	L-R_hindlimb	0.452381	0.547619
Con	1	L-R_hindlimb	0.485714	0.514286			Dox	2	L-R_hindlimb	0.413043	0.586957
Con	1	L-R_hindlimb	0.535714	0.535714			Dox	2	L-R_hindlimb	0.488372	0.511628
Con	1	L-R_hindlimb	0.481481	0.518519			Dox	2	L-R_hindlimb	0.466667	0.533333
Con	2	L-R_hindlimb	0.483871	0.516129			Dox	2	L-R_hindlimb	0.367347	0.632653
Con	2	L-R_hindlimb	0.457143	0.542857			Dox	2	L-R_hindlimb	0.468085	0.531915
Con	2	L-R_hindlimb	0.483871	0.516129			Dox	7	L-R_hindlimb	0.421053	0.578947
Con	7	L-R_hindlimb	0.483871	0.516129			Dox	7	L-R_hindlimb	0.487805	0.512195
Con	7	L-R_hindlimb	0.53125	0.53125			Dox	7	L-R_hindlimb	0.459459	0.540541
Con	8	L-R_hindlimb	0.5	0.5			Dox	7	L-R_hindlimb	0.390244	0.609756
Con	8	L-R_hindlimb	0.583333	0.583333			Dox	7	L-R_hindlimb	0.473684	0.526316
Con	8	L-R_hindlimb	0.4	0.6			Dox	7	L-R_hindlimb	0.459459	0.540541
Con	9	L-R_hindlimb	0.551724	0.551724			Dox	7	L-R_hindlimb	0.451613	0.548387
Con	9	L-R_hindlimb	0.625	0.625			Dox	7	L-R_hindlimb	0.447368	0.552632
Con	9	L-R_hindlimb	0.5	0.5			Dox	7	L-R_hindlimb	0.4	0.6
Con	9	L-R_hindlimb	0.548387	0.548387			Dox	7	L-R_hindlimb	0.4375	0.5625
Con	9	L-R_hindlimb	0.5	0.5			Dox	7	L-R_hindlimb	0.44898	0.55102
Con	10	L-R_hindlimb	0.545455	0.545455			Dox	7	L-R_hindlimb	0.431818	0.568182
Con	10	L-R_hindlimb	0.44	0.56			Dox	7	L-R_hindlimb	0.411765	0.588235
Con	12	L-R_hindlimb	0.481481	0.518519			Dox	7	L-R_hindlimb	0.407407	0.592593
Con	12	L-R_hindlimb	0.466667	0.533333			Dox	7	L-R_hindlimb	0.419355	0.580645
Con	12	L-R_hindlimb	0.5	0.5			Dox	8	L-R_hindlimb	0.46875	0.53125
Con	12	L-R_hindlimb	0.518519	0.518519			Dox	8	L-R_hindlimb	0.405405	0.594595
Con	12	L-R_hindlimb	0.454545	0.545455			Dox	8	L-R_hindlimb	0.444444	0.555556
Con	12	L-R_hindlimb	0.5	0.5			Dox	8	L-R_hindlimb	0.441176	0.558824
Con	12	L-R_hindlimb	0.517241	0.517241			Dox	8	L-R_hindlimb	0.457143	0.542857
Con	13	L-R_hindlimb	0.466667	0.533333			Dox	9	L-R_hindlimb	0.486486	0.513514
Con	13	L-R_hindlimb	0.5	0.5			Dox	9	L-R_hindlimb	0.411765	0.588235
Con	16	L-R_hindlimb	0.5	0.5			Dox	9	L-R_hindlimb	0.5	0.5
Con	16	L-R_hindlimb	0.5	0.5			Dox	10	L-R_hindlimb	0.5	0.5
Con	16	L-R_hindlimb	0.652174	0.652174			Dox	10	L-R_hindlimb	0.4	0.6
Con	18	L-R_hindlimb	0.515152	0.515152			Dox	10	L-R_hindlimb	0.428571	0.571429
Con	18	L-R_hindlimb	0.466667	0.533333			Dox	10	L-R_hindlimb	0.5	0.5
Con	18	L-R_hindlimb	0.5	0.5			Dox	10	L-R_hindlimb	0.484848	0.515152
Con	18	L-R_hindlimb	0.5	0.5			Dox	10	L-R_hindlimb	0.46875	0.53125
Con	1	L-R_hindlimb	0.516129	0.516129			Dox	10	L-R_hindlimb	0.470588	0.529412
Con	1	L-R_hindlimb	0.558824	0.558824			Dox	12	L-R_hindlimb	0.5	0.5
Con	2	L-R_hindlimb	0.470588	0.529412			Dox	12	L-R_hindlimb	0.458333	0.541667
Con	2	L-R_hindlimb	0.53125	0.53125			Dox	12	L-R_hindlimb	0.361111	0.638889
Con	2	L-R_hindlimb	0.575758	0.575758			Dox	12	L-R_hindlimb	0.48	0.52
Con	2	L-R_hindlimb	0.485714	0.514286			Dox	12	L-R_hindlimb	0.458333	0.541667
Con	7	L-R_hindlimb	0.533333	0.533333			Dox	12	L-R_hindlimb	0.444444	0.555556
Con	7	L-R_hindlimb	0.46875	0.53125			Dox	12	L-R_hindlimb	0.466667	0.533333
Con	8	L-R_hindlimb	0.551724	0.551724			Dox	12	L-R_hindlimb	0.5	0.5
Con	8	L-R_hindlimb	0.470588	0.529412			Dox	12	L-R_hindlimb	0.485714	0.514286
Con	8	L-R_hindlimb	0.551724	0.551724			Dox	13	L-R_hindlimb	0.464286	0.535714
Con	8	L-R_hindlimb	0.571429	0.571429			Dox	13	L-R_hindlimb	0.448276	0.551724
Con	8	L-R_hindlimb	0.5	0.5			Dox	13	L-R_hindlimb	0.454545	0.545455
Con	8	L-R_hindlimb	0.513514	0.513514			Dox	13	L-R_hindlimb	0.5	0.5
Con	8	L-R_hindlimb	0.53125	0.53125			Dox	14	L-R_hindlimb	0.457143	0.542857
Con	8	L-R_hindlimb	0.518519	0.518519			Dox	14	L-R_hindlimb	0.481481	0.518519
Con	9	L-R_hindlimb	0.411765	0.588235			Dox	14	L-R_hindlimb	0.477273	0.522727
Con	9	L-R_hindlimb	0.5	0.5			Dox	14	L-R_hindlimb	0.405405	0.594595
Con	9	L-R_hindlimb	0.444444	0.555556			Dox	14	L-R_hindlimb	0.413793	0.586207
Con	9	L-R_hindlimb	0.514286	0.514286			Dox	14	L-R_hindlimb	0.46875	0.53125
Con	10	L-R_hindlimb	0.461538	0.538462			Dox	14	L-R_hindlimb	0.488372	0.511628
Con	10	L-R_hindlimb	0.481481	0.518519			Dox	14	L-R_hindlimb	0.4375	0.5625
Con	10	L-R_hindlimb	0.444444	0.555556			Dox	14	L-R_hindlimb	0.47619	0.52381
Con	12	L-R_hindlimb	0.407407	0.592593			Dox	15	L-R_hindlimb	0.451613	0.548387
Con	12	L-R_hindlimb	0.433333	0.566667			Dox	15	L-R_hindlimb	0.484848	0.515152
Con	12	L-R_hindlimb	0.5	0.5			Dox	15	L-R_hindlimb	0.473684	0.526316
Con	12	L-R_hindlimb	0.5	0.5			Dox	15	L-R_hindlimb	0.451613	0.548387
Con	12	L-R_hindlimb	0.434783	0.565217			Dox	16	L-R_hindlimb	0.481481	0.518519
Con	12	L-R_hindlimb	0.583333	0.583333			Dox	16	L-R_hindlimb	0.423077	0.576923
Con	12	L-R_hindlimb	0.516129	0.516129			Dox	16	L-R_hindlimb	0.470588	0.529412
Con	13	L-R_hindlimb	0.52381	0.52381			Dox	16	L-R_hindlimb	0.333333	0.666667
Con	14	L-R_hindlimb	0.517241	0.517241			Dox	16	L-R_hindlimb	0.44	0.56
Con	14	L-R_hindlimb	0.5	0.5			Dox	16	L-R_hindlimb	0.32	0.68
Con	14	L-R_hindlimb	0.517241	0.517241			Dox	16	L-R_hindlimb	0.485714	0.514286
Con	14	L-R_hindlimb	0.48	0.52			Dox	16	L-R_hindlimb	0.485714	0.514286
Con	14	L-R_hindlimb	0.413793	0.586207			Dox	16	L-R_hindlimb	0.433333	0.566667
Con	14	L-R_hindlimb	0.424242	0.575758			Dox	16	L-R_hindlimb	0.470588	0.529412
Con	14	L-R_hindlimb	0.489362	0.510638			Dox	16	L-R_hindlimb	0.481481	0.518519
Con	14	L-R_hindlimb	0.456522	0.543478			Dox	16	L-R_hindlimb	0.444444	0.555556
Con	14	L-R_hindlimb	0.428571	0.571429			Dox	16	L-R_hindlimb	0.461538	0.538462
Con	14	L-R_hindlimb	0.457143	0.542857			Dox	16	L-R_hindlimb	0.482759	0.517241
Con	15	L-R_hindlimb	0.465116	0.534884			Dox	16	L-R_hindlimb	0.482759	0.517241
Con	15	L-R_hindlimb	0.571429	0.571429			Dox	16	L-R_hindlimb	0.488372	0.511628
Con	15	L-R_hindlimb	0.511628	0.511628			Dox	17	L-R_hindlimb	0.482759	0.517241
Con	15	L-R_hindlimb	0.5	0.5			Dox	17	L-R_hindlimb	0.481481	0.518519
Con	15	L-R_hindlimb	0.487805	0.512195			Dox	17	L-R_hindlimb	0.40625	0.59375
Con	16	L-R_hindlimb	0.607143	0.607143			Dox	17	L-R_hindlimb	0.5	0.5
Con	16	L-R_hindlimb	0.535714	0.535714			Dox	18	L-R_hindlimb	0.37931	0.62069
Con	16	L-R_hindlimb	0.516129	0.516129			Dox	18	L-R_hindlimb	0.384615	0.615385
Con	16	L-R_hindlimb	0.580645	0.580645			Dox	18	L-R_hindlimb	0.424242	0.575758
Con	17	L-R_hindlimb	0.472222	0.527778			Dox	18	L-R_hindlimb	0.434783	0.565217
Con	17	L-R_hindlimb	0.5	0.5			Dox	18	L-R_hindlimb	0.407407	0.592593
Con	18	L-R_hindlimb	0.375	0.625			Dox	1	RHL_homolat	0.46875	0.53125
Con	18	L-R_hindlimb	0.44	0.56			Dox	1	RHL_homolat	0.482759	0.517241
Con	18	L-R_hindlimb	0.390244	0.609756			Dox	1	RHL_homolat	0.363636	0.636364
Con	18	L-R_hindlimb	0.555556	0.555556			Dox	1	RHL_homolat	0.388889	0.611111
Con	18	L-R_hindlimb	0.533333	0.533333			Dox	2	RHL_homolat	0.428571	0.571429
Con	18	L-R_hindlimb	0.473684	0.526316			Dox	2	RHL_homolat	0.457143	0.542857
Con	18	L-R_hindlimb	0.551724	0.551724			Dox	2	RHL_homolat	0.5	0.5
Con	18	L-R_hindlimb	0.5	0.5			Dox	2	RHL_homolat	0.487805	0.512195
Con	18	L-R_hindlimb	0.52	0.52			Dox	2	RHL_homolat	0.47619	0.52381
Con	18	L-R_hindlimb	0.52381	0.52381			Dox	2	RHL_homolat	0.456522	0.543478
Con	1	RHL_homolat	0.647059	0.647059			Dox	2	RHL_homolat	0.44186	0.55814
Con	1	RHL_homolat	0.636364	0.636364			Dox	2	RHL_homolat	0.466667	0.533333
Con	1	RHL_homolat	0.558824	0.558824			Dox	2	RHL_homolat	0.44898	0.55102
Con	1	RHL_homolat	0.594595	0.594595			Dox	2	RHL_homolat	0.297872	0.702128
Con	1	RHL_homolat	0.485714	0.514286			Dox	7	RHL_homolat	0.421053	0.578947
Con	1	RHL_homolat	0.5	0.5			Dox	7	RHL_homolat	0.487805	0.512195
Con	1	RHL_homolat	0.518519	0.518519			Dox	7	RHL_homolat	0.486486	0.513514
Con	1	RHL_homolat	0.548387	0.548387			Dox	7	RHL_homolat	0.463415	0.536585
Con	1	RHL_homolat	0.5	0.5			Dox	7	RHL_homolat	0.5	0.5
Con	2	RHL_homolat	0.645161	0.645161			Dox	7	RHL_homolat	0.432432	0.567568
Con	2	RHL_homolat	0.6	0.6			Dox	7	RHL_homolat	0.387097	0.612903
Con	2	RHL_homolat	0.612903	0.612903			Dox	7	RHL_homolat	0.473684	0.526316
Con	2	RHL_homolat	0.441176	0.558824			Dox	7	RHL_homolat	0.314286	0.685714
Con	2	RHL_homolat	0.5	0.5			Dox	7	RHL_homolat	0.458333	0.541667
Con	2	RHL_homolat	0.636364	0.636364			Dox	7	RHL_homolat	0.469388	0.530612
Con	2	RHL_homolat	0.628571	0.628571			Dox	7	RHL_homolat	0.386364	0.613636
Con	7	RHL_homolat	0.677419	0.677419			Dox	7	RHL_homolat	0.411765	0.588235
Con	7	RHL_homolat	0.5625	0.5625			Dox	7	RHL_homolat	0.407407	0.592593
Con	7	RHL_homolat	0.533333	0.533333			Dox	7	RHL_homolat	0.419355	0.580645
Con	7	RHL_homolat	0.59375	0.59375			Dox	8	RHL_homolat	0.40625	0.59375
Con	8	RHL_homolat	0.65625	0.65625			Dox	8	RHL_homolat	0.405405	0.594595
Con	8	RHL_homolat	0.722222	0.722222			Dox	8	RHL_homolat	0.388889	0.611111
Con	8	RHL_homolat	0.514286	0.514286			Dox	8	RHL_homolat	0.411765	0.588235
Con	8	RHL_homolat	0.724138	0.724138			Dox	8	RHL_homolat	0.485714	0.514286
Con	8	RHL_homolat	0.558824	0.558824			Dox	9	RHL_homolat	0.486486	0.513514
Con	8	RHL_homolat	0.551724	0.551724			Dox	9	RHL_homolat	0.411765	0.588235
Con	8	RHL_homolat	0.607143	0.607143			Dox	9	RHL_homolat	0.40625	0.59375
Con	8	RHL_homolat	0.566667	0.566667			Dox	10	RHL_homolat	0.428571	0.571429
Con	8	RHL_homolat	0.621622	0.621622			Dox	10	RHL_homolat	0.4	0.6
Con	8	RHL_homolat	0.5	0.5			Dox	10	RHL_homolat	0.392857	0.607143
Con	8	RHL_homolat	0.62963	0.62963			Dox	10	RHL_homolat	0.333333	0.666667
Con	9	RHL_homolat	0.551724	0.551724			Dox	10	RHL_homolat	0.333333	0.666667
Con	9	RHL_homolat	0.708333	0.708333			Dox	10	RHL_homolat	0.375	0.625
Con	9	RHL_homolat	0.566667	0.566667			Dox	10	RHL_homolat	0.294118	0.705882
Con	9	RHL_homolat	0.677419	0.677419			Dox	12	RHL_homolat	0.458333	0.541667
Con	9	RHL_homolat	0.558824	0.558824			Dox	12	RHL_homolat	0.375	0.625
Con	9	RHL_homolat	0.529412	0.529412			Dox	12	RHL_homolat	0.388889	0.611111
Con	9	RHL_homolat	0.588235	0.588235			Dox	12	RHL_homolat	0.48	0.52
Con	9	RHL_homolat	0.518519	0.518519			Dox	12	RHL_homolat	0.416667	0.583333
Con	9	RHL_homolat	0.571429	0.571429			Dox	12	RHL_homolat	0.388889	0.611111
Con	10	RHL_homolat	0.636364	0.636364			Dox	12	RHL_homolat	0.4	0.6
Con	10	RHL_homolat	0.56	0.56			Dox	12	RHL_homolat	0.5	0.5
Con	10	RHL_homolat	0.5	0.5			Dox	12	RHL_homolat	0.314286	0.685714
Con	10	RHL_homolat	0.62963	0.62963			Dox	13	RHL_homolat	0.392857	0.607143
Con	10	RHL_homolat	0.555556	0.555556			Dox	13	RHL_homolat	0.482759	0.517241
Con	12	RHL_homolat	0.62963	0.62963			Dox	13	RHL_homolat	0.204545	0.795455
Con	12	RHL_homolat	0.6	0.6			Dox	13	RHL_homolat	0.472222	0.527778
Con	12	RHL_homolat	0.633333	0.633333			Dox	14	RHL_homolat	0.428571	0.571429
Con	12	RHL_homolat	0.740741	0.740741			Dox	14	RHL_homolat	0.37037	0.62963
Con	12	RHL_homolat	0.484848	0.515152			Dox	14	RHL_homolat	0.340909	0.659091
Con	12	RHL_homolat	0.607143	0.607143			Dox	14	RHL_homolat	0.459459	0.540541
Con	12	RHL_homolat	0.586207	0.586207			Dox	14	RHL_homolat	0.344828	0.655172
Con	12	RHL_homolat	0.555556	0.555556			Dox	14	RHL_homolat	0.375	0.625
Con	12	RHL_homolat	0.566667	0.566667			Dox	14	RHL_homolat	0.325581	0.674419
Con	12	RHL_homolat	0.545455	0.545455			Dox	14	RHL_homolat	0.458333	0.541667
Con	12	RHL_homolat	0.541667	0.541667			Dox	14	RHL_homolat	0.333333	0.666667
Con	12	RHL_homolat	0.608696	0.608696			Dox	15	RHL_homolat	0.483871	0.516129
Con	12	RHL_homolat	0.583333	0.583333			Dox	15	RHL_homolat	0.484848	0.515152
Con	12	RHL_homolat	0.548387	0.548387			Dox	15	RHL_homolat	0.5	0.5
Con	13	RHL_homolat	0.566667	0.566667			Dox	15	RHL_homolat	0.483871	0.516129
Con	13	RHL_homolat	0.533333	0.533333			Dox	16	RHL_homolat	0.407407	0.592593
Con	13	RHL_homolat	0.547619	0.547619			Dox	16	RHL_homolat	0.423077	0.576923
Con	14	RHL_homolat	0.62069	0.62069			Dox	16	RHL_homolat	0.352941	0.647059
Con	14	RHL_homolat	0.571429	0.571429			Dox	16	RHL_homolat	0.266667	0.733333
Con	14	RHL_homolat	0.586207	0.586207			Dox	16	RHL_homolat	0.4	0.6
Con	14	RHL_homolat	0.6	0.6			Dox	16	RHL_homolat	0.32	0.68
Con	14	RHL_homolat	0.586207	0.586207			Dox	16	RHL_homolat	0.314286	0.685714
Con	14	RHL_homolat	0.606061	0.606061			Dox	16	RHL_homolat	0.342857	0.657143
Con	14	RHL_homolat	0.702128	0.702128			Dox	16	RHL_homolat	0.4	0.6
Con	14	RHL_homolat	0.543478	0.543478			Dox	16	RHL_homolat	0.411765	0.588235
Con	14	RHL_homolat	0.607143	0.607143			Dox	16	RHL_homolat	0.444444	0.555556
Con	14	RHL_homolat	0.6	0.6			Dox	16	RHL_homolat	0.407407	0.592593
Con	15	RHL_homolat	0.674419	0.674419			Dox	16	RHL_homolat	0.346154	0.653846
Con	15	RHL_homolat	0.690476	0.690476			Dox	16	RHL_homolat	0.37931	0.62069
Con	15	RHL_homolat	0.627907	0.627907			Dox	16	RHL_homolat	0.344828	0.655172
Con	15	RHL_homolat	0.625	0.625			Dox	16	RHL_homolat	0.395349	0.604651
Con	15	RHL_homolat	0.512195	0.512195			Dox	17	RHL_homolat	0.448276	0.551724
Con	16	RHL_homolat	0.607143	0.607143			Dox	17	RHL_homolat	0.444444	0.555556
Con	16	RHL_homolat	0.625	0.625			Dox	17	RHL_homolat	0.46875	0.53125
Con	16	RHL_homolat	0.695652	0.695652			Dox	17	RHL_homolat	0.5	0.5
Con	16	RHL_homolat	0.714286	0.714286			Dox	18	RHL_homolat	0.275862	0.724138
Con	16	RHL_homolat	0.535714	0.535714			Dox	18	RHL_homolat	0.333333	0.666667
Con	16	RHL_homolat	0.580645	0.580645			Dox	18	RHL_homolat	0.363636	0.636364
Con	16	RHL_homolat	0.741935	0.741935			Dox	18	RHL_homolat	0.434783	0.565217
Con	17	RHL_homolat	0.5	0.5			Dox	18	RHL_homolat	0.222222	0.777778
Con	17	RHL_homolat	0.5	0.5			Dox	1	RHL_heterolat	0.03125	0.03125
Con	18	RHL_homolat	0.757576	0.757576			Dox	1	RHL_heterolat	0.0344828	0.0344828
Con	18	RHL_homolat	0.7	0.7			Dox	1	RHL_heterolat	0.159091	0.159091
Con	18	RHL_homolat	0.625	0.625			Dox	1	RHL_heterolat	0.0277778	0.0277778
Con	18	RHL_homolat	0.633333	0.633333			Dox	2	RHL_heterolat	0.114286	0.114286
Con	18	RHL_homolat	0.5	0.5			Dox	2	RHL_heterolat	0.0857143	0.0857143
Con	18	RHL_homolat	0.6	0.6			Dox	2	RHL_heterolat	0	0
Con	18	RHL_homolat	0.585366	0.585366			Dox	2	RHL_heterolat	0.0277778	0.0277778
Con	18	RHL_homolat	0.62963	0.62963			Dox	2	RHL_heterolat	0	0
Con	18	RHL_homolat	0.733333	0.733333			Dox	2	RHL_heterolat	0	0
Con	18	RHL_homolat	0.552632	0.552632			Dox	2	RHL_heterolat	0.0232558	0.0232558
Con	18	RHL_homolat	0.586207	0.586207			Dox	2	RHL_heterolat	0.1	0.1
Con	18	RHL_homolat	0.636364	0.636364			Dox	2	RHL_heterolat	0.102041	0.102041
Con	18	RHL_homolat	0.68	0.68			Dox	2	RHL_heterolat	0.106383	0.106383
Con	18	RHL_homolat	0.690476	0.690476			Dox	7	RHL_heterolat	0	0
Con	1	RHL_heterolat	0.117647	0.117647			Dox	7	RHL_heterolat	0	0
Con	1	RHL_heterolat	0.121212	0.121212			Dox	7	RHL_heterolat	0.0243902	0.0243902
Con	1	RHL_heterolat	0.0588235	0.0588235			Dox	7	RHL_heterolat	0	0
Con	1	RHL_heterolat	0.971429	0.0285714			Dox	7	RHL_heterolat	0.0487805	0.0487805
Con	1	RHL_heterolat	0.0857143	0.0857143			Dox	7	RHL_heterolat	0.105263	0.105263
Con	1	RHL_heterolat	1	0			Dox	7	RHL_heterolat	0.0967742	0.0967742
Con	1	RHL_heterolat	0.037037	0.037037			Dox	7	RHL_heterolat	0.157895	0.157895
Con	1	RHL_heterolat	0.0645161	0.0645161			Dox	7	RHL_heterolat	0.0571429	0.0571429
Con	1	RHL_heterolat	0.0588235	0.0588235			Dox	7	RHL_heterolat	0.0625	0.0625
Con	2	RHL_heterolat	0.0967742	0.0967742			Dox	7	RHL_heterolat	0.0204082	0.0204082
Con	2	RHL_heterolat	0.142857	0.142857			Dox	7	RHL_heterolat	0.0227273	0.0227273
Con	2	RHL_heterolat	0.0967742	0.0967742			Dox	7	RHL_heterolat	0.235294	0.235294
Con	2	RHL_heterolat	1	0			Dox	7	RHL_heterolat	0.111111	0.111111
Con	2	RHL_heterolat	0.0625	0.0625			Dox	7	RHL_heterolat	0.193548	0.193548
Con	2	RHL_heterolat	0.151515	0.151515			Dox	8	RHL_heterolat	0.0625	0.0625
Con	2	RHL_heterolat	0.114286	0.114286			Dox	8	RHL_heterolat	0.0540541	0.0540541
Con	7	RHL_heterolat	0.0967742	0.0967742			Dox	8	RHL_heterolat	0	0
Con	7	RHL_heterolat	0.125	0.125			Dox	8	RHL_heterolat	0.0882353	0.0882353
Con	7	RHL_heterolat	0.0333333	0.0333333			Dox	8	RHL_heterolat	0.0571429	0.0571429
Con	7	RHL_heterolat	0.03125	0.03125			Dox	9	RHL_heterolat	0.162162	0.162162
Con	8	RHL_heterolat	0.21875	0.21875			Dox	9	RHL_heterolat	0.147059	0.147059
Con	8	RHL_heterolat	0.914286	0.0857143			Dox	9	RHL_heterolat	0.1875	0.1875
Con	8	RHL_heterolat	0.142857	0.142857			Dox	10	RHL_heterolat	0.107143	0.107143
Con	8	RHL_heterolat	1	0			Dox	10	RHL_heterolat	0.16	0.16
Con	8	RHL_heterolat	0.176471	0.176471			Dox	10	RHL_heterolat	0.107143	0.107143
Con	8	RHL_heterolat	0.137931	0.137931			Dox	10	RHL_heterolat	0.119048	0.119048
Con	8	RHL_heterolat	0.0714286	0.0714286			Dox	10	RHL_heterolat	0.121212	0.121212
Con	8	RHL_heterolat	0.1	0.1			Dox	10	RHL_heterolat	0.0625	0.0625
Con	8	RHL_heterolat	0.0540541	0.0540541			Dox	10	RHL_heterolat	0.205882	0.205882
Con	8	RHL_heterolat	0.09375	0.09375			Dox	12	RHL_heterolat	0	0
Con	8	RHL_heterolat	0.148148	0.148148			Dox	12	RHL_heterolat	0.0416667	0.0416667
Con	9	RHL_heterolat	0.172414	0.172414			Dox	12	RHL_heterolat	0.0555556	0.0555556
Con	9	RHL_heterolat	0.0833333	0.0833333			Dox	12	RHL_heterolat	0	0
Con	9	RHL_heterolat	0.166667	0.166667			Dox	12	RHL_heterolat	0.04	0.04
Con	9	RHL_heterolat	0.129032	0.129032			Dox	12	RHL_heterolat	0.0555556	0.0555556
Con	9	RHL_heterolat	0.176471	0.176471			Dox	12	RHL_heterolat	0.0666667	0.0666667
Con	9	RHL_heterolat	0.117647	0.117647			Dox	12	RHL_heterolat	0.2	0.2
Con	9	RHL_heterolat	0.0882353	0.0882353			Dox	12	RHL_heterolat	0.0857143	0.0857143
Con	9	RHL_heterolat	0.971429	0.0285714			Dox	13	RHL_heterolat	0.0357143	0.0357143
Con	9	RHL_heterolat	0.142857	0.142857			Dox	13	RHL_heterolat	0.137931	0.137931
Con	10	RHL_heterolat	0.0909091	0.0909091			Dox	13	RHL_heterolat	0.159091	0.159091
Con	10	RHL_heterolat	0.08	0.08			Dox	13	RHL_heterolat	0.111111	0.111111
Con	10	RHL_heterolat	0.0384615	0.0384615			Dox	14	RHL_heterolat	0.114286	0.114286
Con	10	RHL_heterolat	0.037037	0.037037			Dox	14	RHL_heterolat	0.037037	0.037037
Con	10	RHL_heterolat	0.0740741	0.0740741			Dox	14	RHL_heterolat	0.113636	0.113636
Con	12	RHL_heterolat	0.0740741	0.0740741			Dox	14	RHL_heterolat	0.0540541	0.0540541
Con	12	RHL_heterolat	0.0666667	0.0666667			Dox	14	RHL_heterolat	0.103448	0.103448
Con	12	RHL_heterolat	0.166667	0.166667			Dox	14	RHL_heterolat	0.0625	0.0625
Con	12	RHL_heterolat	0.939394	0.0606061			Dox	14	RHL_heterolat	0.0697674	0.0697674
Con	12	RHL_heterolat	0.0909091	0.0909091			Dox	14	RHL_heterolat	0.0833333	0.0833333
Con	12	RHL_heterolat	0.0714286	0.0714286			Dox	14	RHL_heterolat	0.166667	0.166667
Con	12	RHL_heterolat	0.103448	0.103448			Dox	15	RHL_heterolat	0.0645161	0.0645161
Con	12	RHL_heterolat	1	0			Dox	15	RHL_heterolat	0.193548	0.193548
Con	12	RHL_heterolat	0.133333	0.133333			Dox	15	RHL_heterolat	0.0263158	0.0263158
Con	12	RHL_heterolat	0.0454545	0.0454545			Dox	15	RHL_heterolat	0.0967742	0.0967742
Con	12	RHL_heterolat	0.0416667	0.0416667			Dox	16	RHL_heterolat	0.0740741	0.0740741
Con	12	RHL_heterolat	1	0			Dox	16	RHL_heterolat	0.153846	0.153846
Con	12	RHL_heterolat	0.130435	0.130435			Dox	16	RHL_heterolat	0.235294	0.235294
Con	12	RHL_heterolat	0.0967742	0.0967742			Dox	16	RHL_heterolat	0.3	0.3
Con	13	RHL_heterolat	1	0			Dox	16	RHL_heterolat	0.16	0.16
Con	13	RHL_heterolat	0.0666667	0.0666667			Dox	16	RHL_heterolat	0.24	0.24
Con	13	RHL_heterolat	0.047619	0.047619			Dox	16	RHL_heterolat	0.171429	0.171429
Con	14	RHL_heterolat	0.103448	0.103448			Dox	16	RHL_heterolat	0.142857	0.142857
Con	14	RHL_heterolat	0.107143	0.107143			Dox	16	RHL_heterolat	0.0333333	0.0333333
Con	14	RHL_heterolat	0.0689655	0.0689655			Dox	16	RHL_heterolat	0.147059	0.147059
Con	14	RHL_heterolat	0.08	0.08			Dox	16	RHL_heterolat	0.0740741	0.0740741
Con	14	RHL_heterolat	0.0689655	0.0689655			Dox	16	RHL_heterolat	0.037037	0.037037
Con	14	RHL_heterolat	0.0909091	0.0909091			Dox	16	RHL_heterolat	0.115385	0.115385
Con	14	RHL_heterolat	0.12766	0.12766			Dox	16	RHL_heterolat	0.172414	0.172414
Con	14	RHL_heterolat	0.0869565	0.0869565			Dox	16	RHL_heterolat	0.137931	0.137931
Con	14	RHL_heterolat	1	0			Dox	16	RHL_heterolat	0.186047	0.186047
Con	14	RHL_heterolat	0.0857143	0.0857143			Dox	17	RHL_heterolat	0.0344828	0.0344828
Con	15	RHL_heterolat	0.162791	0.162791			Dox	17	RHL_heterolat	0.037037	0.037037
Con	15	RHL_heterolat	0.190476	0.190476			Dox	17	RHL_heterolat	0.03125	0.03125
Con	15	RHL_heterolat	0.186047	0.186047			Dox	17	RHL_heterolat	0.0333333	0.0333333
Con	15	RHL_heterolat	0.0625	0.0625			Dox	18	RHL_heterolat	0.241379	0.241379
Con	15	RHL_heterolat	0.097561	0.097561			Dox	18	RHL_heterolat	0.230769	0.230769
Con	16	RHL_heterolat	0.178571	0.178571			Dox	18	RHL_heterolat	0.0606061	0.0606061
Con	16	RHL_heterolat	0.125	0.125			Dox	18	RHL_heterolat	0.173913	0.173913
Con	16	RHL_heterolat	0.26087	0.26087			Dox	18	RHL_heterolat	0.296296	0.296296
Con	16	RHL_heterolat	0.142857	0.142857
Con	16	RHL_heterolat	0.142857	0.142857
Con	16	RHL_heterolat	0.193548	0.193548
Con	16	RHL_heterolat	0.16129	0.16129
Con	17	RHL_heterolat	0.0277778	0.0277778
Con	17	RHL_heterolat	0.0333333	0.0333333
Con	18	RHL_heterolat	0.151515	0.151515
Con	18	RHL_heterolat	0.0666667	0.0666667
Con	18	RHL_heterolat	0.15625	0.15625
Con	18	RHL_heterolat	0.1	0.1
Con	18	RHL_heterolat	0.916667	0.0833333
Con	18	RHL_heterolat	1	0
Con	18	RHL_heterolat	0.146341	0.146341
Con	18	RHL_heterolat	0.111111	0.111111
Con	18	RHL_heterolat	0.266667	0.266667
Con	18	RHL_heterolat	0.157895	0.157895
Con	18	RHL_heterolat	0.137931	0.137931
Con	18	RHL_heterolat	0.136364	0.136364
Con	18	RHL_heterolat	0.28	0.28
Con	18	RHL_heterolat	0.261905	0.261905
