# Supplementary material for: Long ascending propriospinal neurons provide flexible, context-specific control of interlimb coordination
Source: eLife. 2020 Sep 9;9:e53565. doi: 10.7554/eLife.53565 (PMC7527236; doi:10.7554/eLife.53565)
Supplement: Figure 5—source data 2. [file elife-53565-fig5-data2.xlsx]

## Sheet: RawData
Time_ID	Animal_ID	Limb_ID	rawPhase	transPhase		Time_ID	Animal_ID	Limb_ID	rawPhase	transPhase
Con	1	L-R_forelimbs	0.458333	0.541667		Dox	1	L-R_forelimbs	0.47619	0.52381
Con	1	L-R_forelimbs	0.56	0.56		Dox	1	L-R_forelimbs	0.47619	0.52381
Con	1	L-R_forelimbs	0.583333	0.583333		Dox	1	L-R_forelimbs	0.555556	0.555556
Con	1	L-R_forelimbs	0.45	0.55		Dox	1	L-R_forelimbs	0.568627	0.568627
Con	1	L-R_forelimbs	0.434783	0.565217		Dox	1	L-R_forelimbs	0.5	0.5
Con	1	L-R_forelimbs	0.565217	0.565217		Dox	1	L-R_forelimbs	0.388889	0.611111
Con	1	L-R_forelimbs	0.454545	0.545455		Dox	1	L-R_forelimbs	0.296875	0.703125
Con	1	L-R_forelimbs	0.434783	0.565217		Dox	1	L-R_forelimbs	0.314815	0.685185
Con	1	L-R_forelimbs	0.5	0.5		Dox	1	L-R_forelimbs	0.576923	0.576923
Con	1	L-R_forelimbs	0.52	0.52		Dox	1	L-R_forelimbs	0.489796	0.510204
Con	1	L-R_forelimbs	0.44	0.56		Dox	1	L-R_forelimbs	0.46875	0.53125
Con	1	L-R_forelimbs	0.416667	0.583333		Dox	1	L-R_forelimbs	0.436364	0.563636
Con	1	L-R_forelimbs	0.647059	0.647059		Dox	2	L-R_forelimbs	0.62069	0.62069
Con	1	L-R_forelimbs	0.5	0.5		Dox	2	L-R_forelimbs	0.642857	0.642857
Con	1	L-R_forelimbs	0.565217	0.565217		Dox	2	L-R_forelimbs	0.53125	0.53125
Con	1	L-R_forelimbs	0.45	0.55		Dox	2	L-R_forelimbs	0.433333	0.566667
Con	1	L-R_forelimbs	0.541667	0.541667		Dox	2	L-R_forelimbs	0.583333	0.583333
Con	1	L-R_forelimbs	0.458333	0.541667		Dox	2	L-R_forelimbs	0.558824	0.558824
Con	1	L-R_forelimbs	0.589744	0.589744		Dox	2	L-R_forelimbs	0.517241	0.517241
Con	1	L-R_forelimbs	0.351852	0.648148		Dox	2	L-R_forelimbs	0.428571	0.571429
Con	1	L-R_forelimbs	0.566667	0.566667		Dox	2	L-R_forelimbs	0.468085	0.531915
Con	1	L-R_forelimbs	0.4375	0.5625		Dox	2	L-R_forelimbs	0.4	0.6
Con	1	L-R_forelimbs	0.38961	0.61039		Dox	2	L-R_forelimbs	0.457831	0.542169
Con	1	L-R_forelimbs	0.54	0.54		Dox	7	L-R_forelimbs	0.5	0.5
Con	2	L-R_forelimbs	0.5	0.5		Dox	7	L-R_forelimbs	0.434783	0.565217
Con	2	L-R_forelimbs	0.5	0.5		Dox	7	L-R_forelimbs	0.6	0.6
Con	2	L-R_forelimbs	0.458333	0.541667		Dox	7	L-R_forelimbs	0.5	0.5
Con	2	L-R_forelimbs	0.482759	0.517241		Dox	7	L-R_forelimbs	0.4	0.6
Con	2	L-R_forelimbs	0.5	0.5		Dox	7	L-R_forelimbs	0.28	0.72
Con	2	L-R_forelimbs	0.5	0.5		Dox	7	L-R_forelimbs	0.478261	0.521739
Con	2	L-R_forelimbs	0.423077	0.576923		Dox	7	L-R_forelimbs	0.5	0.5
Con	2	L-R_forelimbs	0.3125	0.6875		Dox	7	L-R_forelimbs	0.355556	0.644444
Con	2	L-R_forelimbs	0.5	0.5		Dox	7	L-R_forelimbs	0.530612	0.530612
Con	2	L-R_forelimbs	0.538462	0.538462		Dox	7	L-R_forelimbs	0.5	0.5
Con	2	L-R_forelimbs	0.481481	0.518519		Dox	7	L-R_forelimbs	0.54717	0.54717
Con	2	L-R_forelimbs	0.48	0.52		Dox	7	L-R_forelimbs	0.45	0.55
Con	2	L-R_forelimbs	0.458333	0.541667		Dox	7	L-R_forelimbs	0.422222	0.577778
Con	2	L-R_forelimbs	0.4	0.6		Dox	7	L-R_forelimbs	0.291667	0.708333
Con	2	L-R_forelimbs	0.345455	0.654545		Dox	8	L-R_forelimbs	0.5	0.5
Con	2	L-R_forelimbs	0.53125	0.53125		Dox	8	L-R_forelimbs	0.578947	0.578947
Con	2	L-R_forelimbs	0.604167	0.604167		Dox	8	L-R_forelimbs	0.647059	0.647059
Con	2	L-R_forelimbs	0.431373	0.568627		Dox	8	L-R_forelimbs	0.671233	0.671233
Con	2	L-R_forelimbs	0.5	0.5		Dox	8	L-R_forelimbs	0.344828	0.655172
Con	7	L-R_forelimbs	0.5	0.5		Dox	8	L-R_forelimbs	0.756098	0.756098
Con	7	L-R_forelimbs	0.5625	0.5625		Dox	8	L-R_forelimbs	0.488889	0.511111
Con	7	L-R_forelimbs	0.428571	0.571429		Dox	9	L-R_forelimbs	0.666667	0.666667
Con	7	L-R_forelimbs	0.52381	0.52381		Dox	9	L-R_forelimbs	0.583333	0.583333
Con	7	L-R_forelimbs	0.47619	0.52381		Dox	9	L-R_forelimbs	0.44	0.56
Con	7	L-R_forelimbs	0.454545	0.545455		Dox	9	L-R_forelimbs	0.56	0.56
Con	7	L-R_forelimbs	0.566038	0.566038		Dox	9	L-R_forelimbs	0.44	0.56
Con	7	L-R_forelimbs	0.625	0.625		Dox	9	L-R_forelimbs	0.453125	0.546875
Con	7	L-R_forelimbs	0.589286	0.589286		Dox	9	L-R_forelimbs	0.55102	0.55102
Con	7	L-R_forelimbs	0.432432	0.567568		Dox	9	L-R_forelimbs	0.466667	0.533333
Con	7	L-R_forelimbs	0.404255	0.595745		Dox	9	L-R_forelimbs	0.641791	0.641791
Con	8	L-R_forelimbs	0.473684	0.526316		Dox	9	L-R_forelimbs	0.645833	0.645833
Con	8	L-R_forelimbs	0.4	0.6		Dox	9	L-R_forelimbs	0.518519	0.518519
Con	8	L-R_forelimbs	0.428571	0.571429		Dox	9	L-R_forelimbs	0.463415	0.536585
Con	8	L-R_forelimbs	0.444444	0.555556		Dox	10	L-R_forelimbs	0.473684	0.526316
Con	8	L-R_forelimbs	0.5	0.5		Dox	10	L-R_forelimbs	0.6	0.6
Con	8	L-R_forelimbs	0.571429	0.571429		Dox	10	L-R_forelimbs	0.3	0.7
Con	8	L-R_forelimbs	0.526316	0.526316		Dox	10	L-R_forelimbs	0.619048	0.619048
Con	8	L-R_forelimbs	0.526316	0.526316		Dox	10	L-R_forelimbs	0.592593	0.592593
Con	8	L-R_forelimbs	0.416667	0.583333		Dox	10	L-R_forelimbs	0.388889	0.611111
Con	8	L-R_forelimbs	0.526316	0.526316		Dox	10	L-R_forelimbs	0.4375	0.5625
Con	8	L-R_forelimbs	0.421053	0.578947		Dox	10	L-R_forelimbs	0.526316	0.526316
Con	8	L-R_forelimbs	0.555556	0.555556		Dox	10	L-R_forelimbs	0.489796	0.510204
Con	8	L-R_forelimbs	0.529412	0.529412		Dox	10	L-R_forelimbs	0.677419	0.677419
Con	8	L-R_forelimbs	0.473684	0.526316		Dox	10	L-R_forelimbs	0.465116	0.534884
Con	8	L-R_forelimbs	0.5	0.5		Dox	10	L-R_forelimbs	0.5	0.5
Con	8	L-R_forelimbs	0.466667	0.533333		Dox	10	L-R_forelimbs	0.307692	0.692308
Con	8	L-R_forelimbs	0.470588	0.529412		Dox	10	L-R_forelimbs	0.571429	0.571429
Con	8	L-R_forelimbs	0.5625	0.5625		Dox	12	L-R_forelimbs	0.529412	0.529412
Con	8	L-R_forelimbs	0.69697	0.69697		Dox	12	L-R_forelimbs	0.435897	0.564103
Con	8	L-R_forelimbs	0.577778	0.577778		Dox	12	L-R_forelimbs	0.485714	0.514286
Con	8	L-R_forelimbs	0.659574	0.659574		Dox	12	L-R_forelimbs	0.636364	0.636364
Con	8	L-R_forelimbs	0.432432	0.567568		Dox	12	L-R_forelimbs	0.38806	0.61194
Con	8	L-R_forelimbs	0.432203	0.567797		Dox	13	L-R_forelimbs	0.52381	0.52381
Con	9	L-R_forelimbs	0.526316	0.526316		Dox	13	L-R_forelimbs	0.470588	0.529412
Con	9	L-R_forelimbs	0.45	0.55		Dox	13	L-R_forelimbs	0.433962	0.566038
Con	9	L-R_forelimbs	0.428571	0.571429		Dox	13	L-R_forelimbs	0.6	0.6
Con	9	L-R_forelimbs	0.466667	0.533333		Dox	13	L-R_forelimbs	0.595745	0.595745
Con	9	L-R_forelimbs	0.533333	0.533333		Dox	13	L-R_forelimbs	0.4375	0.5625
Con	9	L-R_forelimbs	0.5	0.5		Dox	14	L-R_forelimbs	0.588235	0.588235
Con	9	L-R_forelimbs	0.4375	0.5625		Dox	14	L-R_forelimbs	0.481481	0.518519
Con	9	L-R_forelimbs	0.533333	0.533333		Dox	14	L-R_forelimbs	0.608696	0.608696
Con	9	L-R_forelimbs	0.466667	0.533333		Dox	14	L-R_forelimbs	0.515152	0.515152
Con	9	L-R_forelimbs	0.548387	0.548387		Dox	14	L-R_forelimbs	0.203125	0.796875
Con	9	L-R_forelimbs	0.47619	0.52381		Dox	14	L-R_forelimbs	0.421053	0.578947
Con	9	L-R_forelimbs	0.65625	0.65625		Dox	14	L-R_forelimbs	0.511628	0.511628
Con	9	L-R_forelimbs	0.655172	0.655172		Dox	14	L-R_forelimbs	0.414634	0.585366
Con	9	L-R_forelimbs	0.619048	0.619048		Dox	14	L-R_forelimbs	0.361111	0.638889
Con	9	L-R_forelimbs	0.413793	0.586207		Dox	14	L-R_forelimbs	0.487179	0.512821
Con	9	L-R_forelimbs	0.52381	0.52381		Dox	14	L-R_forelimbs	0.5	0.5
Con	9	L-R_forelimbs	0.577778	0.577778		Dox	14	L-R_forelimbs	0.637931	0.637931
Con	9	L-R_forelimbs	0.472222	0.527778		Dox	14	L-R_forelimbs	0.48	0.52
Con	9	L-R_forelimbs	0.47619	0.52381		Dox	14	L-R_forelimbs	0.52459	0.52459
Con	9	L-R_forelimbs	0.5	0.5		Dox	14	L-R_forelimbs	0.5	0.5
Con	9	L-R_forelimbs	0.565217	0.565217		Dox	14	L-R_forelimbs	0.473684	0.526316
Con	9	L-R_forelimbs	0.433333	0.566667		Dox	15	L-R_forelimbs	0.6	0.6
Con	10	L-R_forelimbs	0.470588	0.529412		Dox	15	L-R_forelimbs	0.422222	0.577778
Con	10	L-R_forelimbs	0.413793	0.586207		Dox	15	L-R_forelimbs	0.327869	0.672131
Con	10	L-R_forelimbs	0.583333	0.583333		Dox	15	L-R_forelimbs	0.5	0.5
Con	10	L-R_forelimbs	0.424242	0.575758		Dox	15	L-R_forelimbs	0.634615	0.634615
Con	10	L-R_forelimbs	0.636364	0.636364		Dox	15	L-R_forelimbs	0.339623	0.660377
Con	10	L-R_forelimbs	0.545455	0.545455		Dox	15	L-R_forelimbs	0.568182	0.568182
Con	10	L-R_forelimbs	0.541667	0.541667		Dox	15	L-R_forelimbs	0.594595	0.594595
Con	10	L-R_forelimbs	0.454545	0.545455		Dox	15	L-R_forelimbs	0.702703	0.702703
Con	10	L-R_forelimbs	0.423077	0.576923		Dox	15	L-R_forelimbs	0.297297	0.702703
Con	10	L-R_forelimbs	0.52381	0.52381		Dox	15	L-R_forelimbs	0.590909	0.590909
Con	10	L-R_forelimbs	0.611111	0.611111		Dox	15	L-R_forelimbs	0.465116	0.534884
Con	10	L-R_forelimbs	0.448276	0.551724		Dox	15	L-R_forelimbs	0.637681	0.637681
Con	10	L-R_forelimbs	0.611111	0.611111		Dox	15	L-R_forelimbs	0.347826	0.652174
Con	10	L-R_forelimbs	0.28	0.72		Dox	15	L-R_forelimbs	0.547619	0.547619
Con	10	L-R_forelimbs	0.5	0.5		Dox	15	L-R_forelimbs	0.309091	0.690909
Con	10	L-R_forelimbs	0.458333	0.541667		Dox	15	L-R_forelimbs	0.387097	0.612903
Con	10	L-R_forelimbs	0.36	0.64		Dox	15	L-R_forelimbs	0.736111	0.736111
Con	10	L-R_forelimbs	0.517241	0.517241		Dox	16	L-R_forelimbs	0.578947	0.578947
Con	10	L-R_forelimbs	0.45	0.55		Dox	16	L-R_forelimbs	0.68	0.68
Con	10	L-R_forelimbs	0.39823	0.60177		Dox	16	L-R_forelimbs	0.6	0.6
Con	10	L-R_forelimbs	0.393939	0.606061		Dox	16	L-R_forelimbs	0.655172	0.655172
Con	10	L-R_forelimbs	0.476923	0.523077		Dox	16	L-R_forelimbs	0.459459	0.540541
Con	10	L-R_forelimbs	0.415385	0.584615		Dox	16	L-R_forelimbs	0.638298	0.638298
Con	10	L-R_forelimbs	0.30303	0.69697		Dox	16	L-R_forelimbs	0.571429	0.571429
Con	10	L-R_forelimbs	0.40678	0.59322		Dox	16	L-R_forelimbs	0.536585	0.536585
Con	10	L-R_forelimbs	0.358974	0.641026		Dox	16	L-R_forelimbs	0.589744	0.589744
Con	10	L-R_forelimbs	0.352941	0.647059		Dox	16	L-R_forelimbs	0.294118	0.705882
Con	10	L-R_forelimbs	0.307692	0.692308		Dox	16	L-R_forelimbs	0.487179	0.512821
Con	10	L-R_forelimbs	0.457627	0.542373		Dox	16	L-R_forelimbs	0.578125	0.578125
Con	10	L-R_forelimbs	0.347826	0.652174		Dox	16	L-R_forelimbs	0.475	0.525
Con	12	L-R_forelimbs	0.473684	0.526316		Dox	17	L-R_forelimbs	0.473684	0.526316
Con	12	L-R_forelimbs	0.5	0.5		Dox	17	L-R_forelimbs	0.368421	0.631579
Con	12	L-R_forelimbs	0.473684	0.526316		Dox	17	L-R_forelimbs	0.456522	0.543478
Con	12	L-R_forelimbs	0.47619	0.52381		Dox	17	L-R_forelimbs	0.386364	0.613636
Con	12	L-R_forelimbs	0.428571	0.571429		Dox	17	L-R_forelimbs	0.483871	0.516129
Con	12	L-R_forelimbs	0.5	0.5		Dox	17	L-R_forelimbs	0.66	0.66
Con	12	L-R_forelimbs	0.565217	0.565217		Dox	17	L-R_forelimbs	0.46	0.54
Con	12	L-R_forelimbs	0.52381	0.52381		Dox	17	L-R_forelimbs	0.746269	0.746269
Con	12	L-R_forelimbs	0.47619	0.52381		Dox	17	L-R_forelimbs	0.516129	0.516129
Con	12	L-R_forelimbs	0.526316	0.526316		Dox	17	L-R_forelimbs	0.457143	0.542857
Con	12	L-R_forelimbs	0.485714	0.514286		Dox	17	L-R_forelimbs	0.71831	0.71831
Con	12	L-R_forelimbs	0.6	0.6		Dox	17	L-R_forelimbs	0.53125	0.53125
Con	12	L-R_forelimbs	0.653333	0.653333		Dox	17	L-R_forelimbs	0.45614	0.54386
Con	12	L-R_forelimbs	0.44186	0.55814		Dox	17	L-R_forelimbs	0.404762	0.595238
Con	12	L-R_forelimbs	0.491803	0.508197		Dox	18	L-R_forelimbs	0.589744	0.589744
Con	12	L-R_forelimbs	0.486486	0.513514		Dox	18	L-R_forelimbs	0.479167	0.520833
Con	12	L-R_forelimbs	0.66129	0.66129		Dox	18	L-R_forelimbs	0.441176	0.558824
Con	12	L-R_forelimbs	0.44186	0.55814		Dox	18	L-R_forelimbs	0.477273	0.522727
Con	13	L-R_forelimbs	0.5	0.5		Dox	18	L-R_forelimbs	0.547619	0.547619
Con	13	L-R_forelimbs	0.45	0.55		Dox	18	L-R_forelimbs	0.5625	0.5625
Con	13	L-R_forelimbs	0.434783	0.565217		Dox	18	L-R_forelimbs	0.55	0.55
Con	13	L-R_forelimbs	0.545455	0.545455		Dox	18	L-R_forelimbs	0.475	0.525
Con	13	L-R_forelimbs	0.526316	0.526316		Dox	1	L-R_hindlimbs	0.391304	0.608696
Con	13	L-R_forelimbs	0.428571	0.571429		Dox	1	L-R_hindlimbs	0.264706	0.735294
Con	13	L-R_forelimbs	0.478261	0.521739		Dox	1	L-R_hindlimbs	0.44186	0.55814
Con	13	L-R_forelimbs	0.5	0.5		Dox	1	L-R_hindlimbs	0.45614	0.54386
Con	13	L-R_forelimbs	0.5	0.5		Dox	1	L-R_hindlimbs	0.404762	0.595238
Con	13	L-R_forelimbs	0.351351	0.648649		Dox	1	L-R_hindlimbs	0.681818	0.681818
Con	13	L-R_forelimbs	0.316667	0.683333		Dox	1	L-R_hindlimbs	0.672727	0.672727
Con	13	L-R_forelimbs	0.5	0.5		Dox	1	L-R_hindlimbs	0.5	0.5
Con	13	L-R_forelimbs	0.619048	0.619048		Dox	1	L-R_hindlimbs	0.375	0.625
Con	13	L-R_forelimbs	0.5625	0.5625		Dox	1	L-R_hindlimbs	0.5	0.5
Con	13	L-R_forelimbs	0.606557	0.606557		Dox	1	L-R_hindlimbs	0.677419	0.677419
Con	13	L-R_forelimbs	0.456522	0.543478		Dox	1	L-R_hindlimbs	0.56	0.56
Con	14	L-R_forelimbs	0.5	0.5		Dox	2	L-R_hindlimbs	0.458333	0.541667
Con	14	L-R_forelimbs	0.5	0.5		Dox	2	L-R_hindlimbs	0.357143	0.642857
Con	14	L-R_forelimbs	0.5	0.5		Dox	2	L-R_hindlimbs	0.466667	0.533333
Con	14	L-R_forelimbs	0.571429	0.571429		Dox	2	L-R_hindlimbs	0.333333	0.666667
Con	14	L-R_forelimbs	0.521739	0.521739		Dox	2	L-R_hindlimbs	0.387097	0.612903
Con	14	L-R_forelimbs	0.47619	0.52381		Dox	2	L-R_hindlimbs	0.538462	0.538462
Con	14	L-R_forelimbs	0.409091	0.590909		Dox	2	L-R_hindlimbs	0.363636	0.636364
Con	14	L-R_forelimbs	0.52	0.52		Dox	2	L-R_hindlimbs	0.444444	0.555556
Con	14	L-R_forelimbs	0.45	0.55		Dox	2	L-R_hindlimbs	0.666667	0.666667
Con	14	L-R_forelimbs	0.511628	0.511628		Dox	2	L-R_hindlimbs	0.611111	0.611111
Con	14	L-R_forelimbs	0.413793	0.586207		Dox	2	L-R_hindlimbs	0.462963	0.537037
Con	14	L-R_forelimbs	0.516667	0.516667		Dox	7	L-R_hindlimbs	0.454545	0.545455
Con	14	L-R_forelimbs	0.540541	0.540541		Dox	7	L-R_hindlimbs	0.478261	0.521739
Con	14	L-R_forelimbs	0.481481	0.518519		Dox	7	L-R_hindlimbs	0.434783	0.565217
Con	14	L-R_forelimbs	0.533333	0.533333		Dox	7	L-R_hindlimbs	0.380952	0.619048
Con	14	L-R_forelimbs	0.475	0.525		Dox	7	L-R_hindlimbs	0.407407	0.592593
Con	14	L-R_forelimbs	0.533333	0.533333		Dox	7	L-R_hindlimbs	0.545455	0.545455
Con	14	L-R_forelimbs	0.45	0.55		Dox	7	L-R_hindlimbs	0.458333	0.541667
Con	14	L-R_forelimbs	0.470588	0.529412		Dox	7	L-R_hindlimbs	0.478261	0.521739
Con	15	L-R_forelimbs	0.5	0.5		Dox	7	L-R_hindlimbs	0.557692	0.557692
Con	15	L-R_forelimbs	0.411765	0.588235		Dox	7	L-R_hindlimbs	0.465116	0.534884
Con	15	L-R_forelimbs	0.444444	0.555556		Dox	7	L-R_hindlimbs	0.5	0.5
Con	15	L-R_forelimbs	0.473684	0.526316		Dox	7	L-R_hindlimbs	0.560976	0.560976
Con	15	L-R_forelimbs	0.55814	0.55814		Dox	7	L-R_hindlimbs	0.45098	0.54902
Con	15	L-R_forelimbs	0.396825	0.603175		Dox	7	L-R_hindlimbs	0.526316	0.526316
Con	15	L-R_forelimbs	0.632911	0.632911		Dox	7	L-R_hindlimbs	0.559322	0.559322
Con	15	L-R_forelimbs	0.461538	0.538462		Dox	8	L-R_hindlimbs	0.5	0.5
Con	15	L-R_forelimbs	0.407407	0.592593		Dox	8	L-R_hindlimbs	0.571429	0.571429
Con	15	L-R_forelimbs	0.472727	0.527273		Dox	8	L-R_hindlimbs	0.52	0.52
Con	15	L-R_forelimbs	0.5	0.5		Dox	8	L-R_hindlimbs	0.414894	0.585106
Con	15	L-R_forelimbs	0.5625	0.5625		Dox	8	L-R_hindlimbs	0.555556	0.555556
Con	15	L-R_forelimbs	0.47619	0.52381		Dox	8	L-R_hindlimbs	0.6	0.6
Con	15	L-R_forelimbs	0.622951	0.622951		Dox	8	L-R_hindlimbs	0.536585	0.536585
Con	15	L-R_forelimbs	0.54386	0.54386		Dox	9	L-R_hindlimbs	0.434783	0.565217
Con	15	L-R_forelimbs	0.560606	0.560606		Dox	9	L-R_hindlimbs	0.461538	0.538462
Con	15	L-R_forelimbs	0.318182	0.681818		Dox	9	L-R_hindlimbs	0.333333	0.666667
Con	15	L-R_forelimbs	0.5	0.5		Dox	9	L-R_hindlimbs	0.407407	0.592593
Con	15	L-R_forelimbs	0.383562	0.616438		Dox	9	L-R_hindlimbs	0.478261	0.521739
Con	15	L-R_forelimbs	0.618182	0.618182		Dox	9	L-R_hindlimbs	0.606557	0.606557
Con	15	L-R_forelimbs	0.4	0.6		Dox	9	L-R_hindlimbs	0.454545	0.545455
Con	15	L-R_forelimbs	0.590164	0.590164		Dox	9	L-R_hindlimbs	0.5	0.5
Con	15	L-R_forelimbs	0.333333	0.666667		Dox	9	L-R_hindlimbs	0.581395	0.581395
Con	15	L-R_forelimbs	0.537037	0.537037		Dox	9	L-R_hindlimbs	0.316667	0.683333
Con	15	L-R_forelimbs	0.464789	0.535211		Dox	9	L-R_hindlimbs	0.490909	0.509091
Con	15	L-R_forelimbs	0.482759	0.517241		Dox	9	L-R_hindlimbs	0.4	0.6
Con	15	L-R_forelimbs	0.657143	0.657143		Dox	10	L-R_hindlimbs	0.521739	0.521739
Con	15	L-R_forelimbs	0.3	0.7		Dox	10	L-R_hindlimbs	0.657895	0.657895
Con	16	L-R_forelimbs	0.444444	0.555556		Dox	10	L-R_hindlimbs	0.55	0.55
Con	16	L-R_forelimbs	0.5	0.5		Dox	10	L-R_hindlimbs	0.652174	0.652174
Con	16	L-R_forelimbs	0.470588	0.529412		Dox	10	L-R_hindlimbs	0.666667	0.666667
Con	16	L-R_forelimbs	0.611111	0.611111		Dox	10	L-R_hindlimbs	0.5	0.5
Con	16	L-R_forelimbs	0.625	0.625		Dox	10	L-R_hindlimbs	0.384615	0.615385
Con	16	L-R_forelimbs	0.529412	0.529412		Dox	10	L-R_hindlimbs	0.755556	0.755556
Con	16	L-R_forelimbs	0.5	0.5		Dox	10	L-R_hindlimbs	0.473684	0.526316
Con	16	L-R_forelimbs	0.649123	0.649123		Dox	10	L-R_hindlimbs	0.578947	0.578947
Con	16	L-R_forelimbs	0.634615	0.634615		Dox	10	L-R_hindlimbs	0.4	0.6
Con	16	L-R_forelimbs	0.489796	0.510204		Dox	10	L-R_hindlimbs	0.510204	0.510204
Con	16	L-R_forelimbs	0.512195	0.512195		Dox	10	L-R_hindlimbs	0.623188	0.623188
Con	16	L-R_forelimbs	0.552632	0.552632		Dox	10	L-R_hindlimbs	0.608696	0.608696
Con	16	L-R_forelimbs	0.541667	0.541667		Dox	12	L-R_hindlimbs	0.575758	0.575758
Con	16	L-R_forelimbs	0.659574	0.659574		Dox	12	L-R_hindlimbs	0.486486	0.513514
Con	16	L-R_forelimbs	0.525	0.525		Dox	12	L-R_hindlimbs	0.5	0.5
Con	16	L-R_forelimbs	0.432432	0.567568		Dox	12	L-R_hindlimbs	0.288462	0.711538
Con	16	L-R_forelimbs	0.580645	0.580645		Dox	12	L-R_hindlimbs	0.441558	0.558442
Con	16	L-R_forelimbs	0.425	0.575		Dox	13	L-R_hindlimbs	0.692308	0.692308
Con	17	L-R_forelimbs	0.473684	0.526316		Dox	13	L-R_hindlimbs	0.431818	0.568182
Con	17	L-R_forelimbs	0.478261	0.521739		Dox	13	L-R_hindlimbs	0.684211	0.684211
Con	17	L-R_forelimbs	0.434783	0.565217		Dox	13	L-R_hindlimbs	0.434783	0.565217
Con	17	L-R_forelimbs	0.48	0.52		Dox	13	L-R_hindlimbs	0.622642	0.622642
Con	17	L-R_forelimbs	0.5	0.5		Dox	13	L-R_hindlimbs	0.745455	0.745455
Con	17	L-R_forelimbs	0.45	0.55		Dox	14	L-R_hindlimbs	0.482759	0.517241
Con	17	L-R_forelimbs	0.44	0.56		Dox	14	L-R_hindlimbs	0.647059	0.647059
Con	17	L-R_forelimbs	0.588235	0.588235		Dox	14	L-R_hindlimbs	0.463415	0.536585
Con	17	L-R_forelimbs	0.361702	0.638298		Dox	14	L-R_hindlimbs	0.361702	0.638298
Con	17	L-R_forelimbs	0.395833	0.604167		Dox	14	L-R_hindlimbs	0.21875	0.78125
Con	17	L-R_forelimbs	0.446809	0.553191		Dox	14	L-R_hindlimbs	0.567568	0.567568
Con	17	L-R_forelimbs	0.45	0.55		Dox	14	L-R_hindlimbs	0.552632	0.552632
Con	17	L-R_forelimbs	0.561404	0.561404		Dox	14	L-R_hindlimbs	0.386364	0.613636
Con	17	L-R_forelimbs	0.425926	0.574074		Dox	14	L-R_hindlimbs	0.459459	0.540541
Con	17	L-R_forelimbs	0.581395	0.581395		Dox	14	L-R_hindlimbs	0.457143	0.542857
Con	17	L-R_forelimbs	0.470588	0.529412		Dox	14	L-R_hindlimbs	0.466667	0.533333
Con	17	L-R_forelimbs	0.477273	0.522727		Dox	14	L-R_hindlimbs	0.5	0.5
Con	17	L-R_forelimbs	0.536585	0.536585		Dox	14	L-R_hindlimbs	0.5	0.5
Con	17	L-R_forelimbs	0.488372	0.511628		Dox	14	L-R_hindlimbs	0.488372	0.511628
Con	17	L-R_forelimbs	0.518519	0.518519		Dox	14	L-R_hindlimbs	0.5	0.5
Con	17	L-R_forelimbs	0.571429	0.571429		Dox	14	L-R_hindlimbs	0.428571	0.571429
Con	17	L-R_forelimbs	0.479167	0.520833		Dox	15	L-R_hindlimbs	0.6	0.6
Con	18	L-R_forelimbs	0.421053	0.578947		Dox	15	L-R_hindlimbs	0.396226	0.603774
Con	18	L-R_forelimbs	0.421053	0.578947		Dox	15	L-R_hindlimbs	0.692308	0.692308
Con	18	L-R_forelimbs	0.454545	0.545455		Dox	15	L-R_hindlimbs	0.666667	0.666667
Con	18	L-R_forelimbs	0.409091	0.590909		Dox	15	L-R_hindlimbs	0.5	0.5
Con	18	L-R_forelimbs	0.52381	0.52381		Dox	15	L-R_hindlimbs	0.44898	0.55102
Con	18	L-R_forelimbs	0.5	0.5		Dox	15	L-R_hindlimbs	0.536585	0.536585
Con	18	L-R_forelimbs	0.478261	0.521739		Dox	15	L-R_hindlimbs	0.461538	0.538462
Con	18	L-R_forelimbs	0.66	0.66		Dox	15	L-R_hindlimbs	0.694444	0.694444
Con	18	L-R_forelimbs	0.477273	0.522727		Dox	15	L-R_hindlimbs	0.514286	0.514286
Con	18	L-R_forelimbs	0.512195	0.512195		Dox	15	L-R_hindlimbs	0.283582	0.716418
Con	18	L-R_forelimbs	0.416667	0.583333		Dox	15	L-R_hindlimbs	0.636364	0.636364
Con	18	L-R_forelimbs	0.407407	0.592593		Dox	15	L-R_hindlimbs	0.465116	0.534884
Con	18	L-R_forelimbs	0.661972	0.661972		Dox	15	L-R_hindlimbs	0.448276	0.551724
Con	18	L-R_forelimbs	0.552632	0.552632		Dox	15	L-R_hindlimbs	0.694915	0.694915
Con	18	L-R_forelimbs	0.473684	0.526316		Dox	15	L-R_hindlimbs	0.689189	0.689189
Con	18	L-R_forelimbs	0.482143	0.517857		Dox	15	L-R_hindlimbs	0.473684	0.526316
Con	18	L-R_forelimbs	0.55814	0.55814		Dox	15	L-R_hindlimbs	0.222222	0.777778
Con	18	L-R_forelimbs	0.534884	0.534884		Dox	16	L-R_hindlimbs	0.457143	0.542857
Con	18	L-R_forelimbs	0.673077	0.673077		Dox	16	L-R_hindlimbs	0.5	0.5
Con	18	L-R_forelimbs	0.515152	0.515152		Dox	16	L-R_hindlimbs	0.380952	0.619048
Con	18	L-R_forelimbs	0.5	0.5		Dox	16	L-R_hindlimbs	0.536585	0.536585
Con	1	L-R_hindlimbs	0.48	0.52		Dox	16	L-R_hindlimbs	0.339286	0.660714
Con	1	L-R_hindlimbs	0.48	0.52		Dox	16	L-R_hindlimbs	0.529412	0.529412
Con	1	L-R_hindlimbs	0.45	0.55		Dox	16	L-R_hindlimbs	0.5	0.5
Con	1	L-R_hindlimbs	0.478261	0.521739		Dox	16	L-R_hindlimbs	0.466667	0.533333
Con	1	L-R_hindlimbs	0.5	0.5		Dox	16	L-R_hindlimbs	0.459459	0.540541
Con	1	L-R_hindlimbs	0.52	0.52		Dox	16	L-R_hindlimbs	0.574468	0.574468
Con	1	L-R_hindlimbs	0.384615	0.615385		Dox	16	L-R_hindlimbs	0.475	0.525
Con	1	L-R_hindlimbs	0.47619	0.52381		Dox	16	L-R_hindlimbs	0.679245	0.679245
Con	1	L-R_hindlimbs	0.52381	0.52381		Dox	16	L-R_hindlimbs	0.53125	0.53125
Con	1	L-R_hindlimbs	0.44	0.56		Dox	17	L-R_hindlimbs	0.368421	0.631579
Con	1	L-R_hindlimbs	0.545455	0.545455		Dox	17	L-R_hindlimbs	0.439024	0.560976
Con	1	L-R_hindlimbs	0.461538	0.538462		Dox	17	L-R_hindlimbs	0.485714	0.514286
Con	1	L-R_hindlimbs	0.526316	0.526316		Dox	17	L-R_hindlimbs	0.395349	0.604651
Con	1	L-R_hindlimbs	0.421053	0.578947		Dox	17	L-R_hindlimbs	0.421053	0.578947
Con	1	L-R_hindlimbs	0.545455	0.545455		Dox	17	L-R_hindlimbs	0.545455	0.545455
Con	1	L-R_hindlimbs	0.416667	0.583333		Dox	17	L-R_hindlimbs	0.566667	0.566667
Con	1	L-R_hindlimbs	0.545455	0.545455		Dox	17	L-R_hindlimbs	0.511111	0.511111
Con	1	L-R_hindlimbs	0.520833	0.520833		Dox	17	L-R_hindlimbs	0.322581	0.677419
Con	1	L-R_hindlimbs	0.475	0.525		Dox	17	L-R_hindlimbs	0.526316	0.526316
Con	1	L-R_hindlimbs	0.316456	0.683544		Dox	17	L-R_hindlimbs	0.461538	0.538462
Con	1	L-R_hindlimbs	0.4	0.6		Dox	17	L-R_hindlimbs	0.308824	0.691176
Con	1	L-R_hindlimbs	0.316667	0.683333		Dox	17	L-R_hindlimbs	0.583333	0.583333
Con	1	L-R_hindlimbs	0.478261	0.521739		Dox	17	L-R_hindlimbs	0.414634	0.585366
Con	1	L-R_hindlimbs	0.491228	0.508772		Dox	18	L-R_hindlimbs	0.515152	0.515152
Con	2	L-R_hindlimbs	0.52	0.52		Dox	18	L-R_hindlimbs	0.5	0.5
Con	2	L-R_hindlimbs	0.62963	0.62963		Dox	18	L-R_hindlimbs	0.404762	0.595238
Con	2	L-R_hindlimbs	0.615385	0.615385		Dox	18	L-R_hindlimbs	0.55	0.55
Con	2	L-R_hindlimbs	0.535714	0.535714		Dox	18	L-R_hindlimbs	0.661538	0.661538
Con	2	L-R_hindlimbs	0.461538	0.538462		Dox	18	L-R_hindlimbs	0.44186	0.55814
Con	2	L-R_hindlimbs	0.5	0.5		Dox	18	L-R_hindlimbs	0.511111	0.511111
Con	2	L-R_hindlimbs	0.535714	0.535714		Dox	18	L-R_hindlimbs	0.622222	0.622222
Con	2	L-R_hindlimbs	0.461538	0.538462		Dox	1	RHL_homolat	0.708333	0.708333
Con	2	L-R_hindlimbs	0.48	0.52		Dox	1	RHL_homolat	0.382353	0.617647
Con	2	L-R_hindlimbs	0.461538	0.538462		Dox	1	RHL_homolat	0.651163	0.651163
Con	2	L-R_hindlimbs	0.4	0.6		Dox	1	RHL_homolat	0.596491	0.596491
Con	2	L-R_hindlimbs	0.583333	0.583333		Dox	1	RHL_homolat	0.571429	0.571429
Con	2	L-R_hindlimbs	0.565217	0.565217		Dox	1	RHL_homolat	0.818182	0.818182
Con	2	L-R_hindlimbs	0.545455	0.545455		Dox	1	RHL_homolat	0.818182	0.818182
Con	2	L-R_hindlimbs	0.654545	0.654545		Dox	1	RHL_homolat	0.785714	0.785714
Con	2	L-R_hindlimbs	0.484848	0.515152		Dox	1	RHL_homolat	0.604167	0.604167
Con	2	L-R_hindlimbs	0.567568	0.567568		Dox	1	RHL_homolat	0.677419	0.677419
Con	2	L-R_hindlimbs	0.62963	0.62963		Dox	1	RHL_homolat	0.645161	0.645161
Con	2	L-R_hindlimbs	0.619048	0.619048		Dox	1	RHL_homolat	0.7	0.7
Con	7	L-R_hindlimbs	0.470588	0.529412		Dox	2	RHL_homolat	0.541667	0.541667
Con	7	L-R_hindlimbs	0.5	0.5		Dox	2	RHL_homolat	0.428571	0.571429
Con	7	L-R_hindlimbs	0.434783	0.565217		Dox	2	RHL_homolat	0.533333	0.533333
Con	7	L-R_hindlimbs	0.421053	0.578947		Dox	2	RHL_homolat	0.466667	0.533333
Con	7	L-R_hindlimbs	0.47619	0.52381		Dox	2	RHL_homolat	0.483871	0.516129
Con	7	L-R_hindlimbs	0.434783	0.565217		Dox	2	RHL_homolat	0.653846	0.653846
Con	7	L-R_hindlimbs	0.577778	0.577778		Dox	2	RHL_homolat	0.484848	0.515152
Con	7	L-R_hindlimbs	0.512821	0.512821		Dox	2	RHL_homolat	0.622222	0.622222
Con	7	L-R_hindlimbs	0.333333	0.666667		Dox	2	RHL_homolat	0.561404	0.561404
Con	7	L-R_hindlimbs	0.584906	0.584906		Dox	2	RHL_homolat	0.722222	0.722222
Con	7	L-R_hindlimbs	0.533333	0.533333		Dox	2	RHL_homolat	0.5	0.5
Con	8	L-R_hindlimbs	0.52381	0.52381		Dox	7	RHL_homolat	0.727273	0.727273
Con	8	L-R_hindlimbs	0.5	0.5		Dox	7	RHL_homolat	0.652174	0.652174
Con	8	L-R_hindlimbs	0.55	0.55		Dox	7	RHL_homolat	0.652174	0.652174
Con	8	L-R_hindlimbs	0.578947	0.578947		Dox	7	RHL_homolat	0.52381	0.52381
Con	8	L-R_hindlimbs	0.529412	0.529412		Dox	7	RHL_homolat	0.518519	0.518519
Con	8	L-R_hindlimbs	0.521739	0.521739		Dox	7	RHL_homolat	0.727273	0.727273
Con	8	L-R_hindlimbs	0.529412	0.529412		Dox	7	RHL_homolat	0.625	0.625
Con	8	L-R_hindlimbs	0.521739	0.521739		Dox	7	RHL_homolat	0.652174	0.652174
Con	8	L-R_hindlimbs	0.5	0.5		Dox	7	RHL_homolat	0.826923	0.826923
Con	8	L-R_hindlimbs	0.529412	0.529412		Dox	7	RHL_homolat	0.634615	0.634615
Con	8	L-R_hindlimbs	0.5	0.5		Dox	7	RHL_homolat	0.72093	0.72093
Con	8	L-R_hindlimbs	0.555556	0.555556		Dox	7	RHL_homolat	0.625	0.625
Con	8	L-R_hindlimbs	0.611111	0.611111		Dox	7	RHL_homolat	0.756098	0.756098
Con	8	L-R_hindlimbs	0.588235	0.588235		Dox	7	RHL_homolat	0.568627	0.568627
Con	8	L-R_hindlimbs	0.555556	0.555556		Dox	7	RHL_homolat	0.710526	0.710526
Con	8	L-R_hindlimbs	0.526316	0.526316		Dox	8	RHL_homolat	0.555556	0.555556
Con	8	L-R_hindlimbs	0.588235	0.588235		Dox	8	RHL_homolat	0.428571	0.571429
Con	8	L-R_hindlimbs	0.5	0.5		Dox	8	RHL_homolat	0.6	0.6
Con	8	L-R_hindlimbs	0.526316	0.526316		Dox	8	RHL_homolat	0.489362	0.510638
Con	8	L-R_hindlimbs	0.5	0.5		Dox	8	RHL_homolat	0.666667	0.666667
Con	8	L-R_hindlimbs	0.377358	0.622642		Dox	8	RHL_homolat	0.644444	0.644444
Con	8	L-R_hindlimbs	0.536585	0.536585		Dox	8	RHL_homolat	0.634146	0.634146
Con	8	L-R_hindlimbs	0.338462	0.661538		Dox	9	RHL_homolat	0.608696	0.608696
Con	9	L-R_hindlimbs	0.55	0.55		Dox	9	RHL_homolat	0.615385	0.615385
Con	9	L-R_hindlimbs	0.6	0.6		Dox	9	RHL_homolat	0.5	0.5
Con	9	L-R_hindlimbs	0.4375	0.5625		Dox	9	RHL_homolat	0.518519	0.518519
Con	9	L-R_hindlimbs	0.6	0.6		Dox	9	RHL_homolat	0.652174	0.652174
Con	9	L-R_hindlimbs	0.555556	0.555556		Dox	9	RHL_homolat	0.704918	0.704918
Con	9	L-R_hindlimbs	0.470588	0.529412		Dox	9	RHL_homolat	0.618182	0.618182
Con	9	L-R_hindlimbs	0.533333	0.533333		Dox	9	RHL_homolat	0.711538	0.711538
Con	9	L-R_hindlimbs	0.5625	0.5625		Dox	9	RHL_homolat	0.813953	0.813953
Con	9	L-R_hindlimbs	0.571429	0.571429		Dox	9	RHL_homolat	0.466667	0.533333
Con	9	L-R_hindlimbs	0.576923	0.576923		Dox	9	RHL_homolat	0.636364	0.636364
Con	9	L-R_hindlimbs	0.36	0.64		Dox	9	RHL_homolat	0.62	0.62
Con	9	L-R_hindlimbs	0.545455	0.545455		Dox	10	RHL_homolat	0.565217	0.565217
Con	9	L-R_hindlimbs	0.55	0.55		Dox	10	RHL_homolat	0.815789	0.815789
Con	9	L-R_hindlimbs	0.578947	0.578947		Dox	10	RHL_homolat	0.55	0.55
Con	9	L-R_hindlimbs	0.575758	0.575758		Dox	10	RHL_homolat	0.782609	0.782609
Con	9	L-R_hindlimbs	0.529412	0.529412		Dox	10	RHL_homolat	0.692308	0.692308
Con	9	L-R_hindlimbs	0.44186	0.55814		Dox	10	RHL_homolat	0.678571	0.678571
Con	9	L-R_hindlimbs	0.5	0.5		Dox	10	RHL_homolat	0.5	0.5
Con	9	L-R_hindlimbs	0.595745	0.595745		Dox	10	RHL_homolat	0.866667	0.866667
Con	9	L-R_hindlimbs	0.55814	0.55814		Dox	10	RHL_homolat	0.614035	0.614035
Con	9	L-R_hindlimbs	0.545455	0.545455		Dox	10	RHL_homolat	0.754386	0.754386
Con	9	L-R_hindlimbs	0.487805	0.512195		Dox	10	RHL_homolat	0.62	0.62
Con	10	L-R_hindlimbs	0.538462	0.538462		Dox	10	RHL_homolat	0.755102	0.755102
Con	10	L-R_hindlimbs	0.5	0.5		Dox	10	RHL_homolat	0.782609	0.782609
Con	10	L-R_hindlimbs	0.478261	0.521739		Dox	10	RHL_homolat	0.76087	0.76087
Con	10	L-R_hindlimbs	0.5	0.5		Dox	12	RHL_homolat	0.69697	0.69697
Con	10	L-R_hindlimbs	0.428571	0.571429		Dox	12	RHL_homolat	0.702703	0.702703
Con	10	L-R_hindlimbs	0.6	0.6		Dox	12	RHL_homolat	0.5	0.5
Con	10	L-R_hindlimbs	0.4	0.6		Dox	12	RHL_homolat	0.692308	0.692308
Con	10	L-R_hindlimbs	0.541667	0.541667		Dox	12	RHL_homolat	0.649351	0.649351
Con	10	L-R_hindlimbs	0.454545	0.545455		Dox	13	RHL_homolat	0.596154	0.596154
Con	10	L-R_hindlimbs	0.565217	0.565217		Dox	13	RHL_homolat	0.545455	0.545455
Con	10	L-R_hindlimbs	0.571429	0.571429		Dox	13	RHL_homolat	0.605263	0.605263
Con	10	L-R_hindlimbs	0.548387	0.548387		Dox	13	RHL_homolat	0.521739	0.521739
Con	10	L-R_hindlimbs	0.5625	0.5625		Dox	13	RHL_homolat	0.566038	0.566038
Con	10	L-R_hindlimbs	0.535714	0.535714		Dox	13	RHL_homolat	0.672727	0.672727
Con	10	L-R_hindlimbs	0.45	0.55		Dox	14	RHL_homolat	0.689655	0.689655
Con	10	L-R_hindlimbs	0.47619	0.52381		Dox	14	RHL_homolat	0.72549	0.72549
Con	10	L-R_hindlimbs	0.363636	0.636364		Dox	14	RHL_homolat	0.585366	0.585366
Con	10	L-R_hindlimbs	0.514286	0.514286		Dox	14	RHL_homolat	0.531915	0.531915
Con	10	L-R_hindlimbs	0.487805	0.512195		Dox	14	RHL_homolat	0.875	0.875
Con	10	L-R_hindlimbs	0.568182	0.568182		Dox	14	RHL_homolat	0.783784	0.783784
Con	10	L-R_hindlimbs	0.46	0.54		Dox	14	RHL_homolat	0.763158	0.763158
Con	10	L-R_hindlimbs	0.491228	0.508772		Dox	14	RHL_homolat	0.681818	0.681818
Con	10	L-R_hindlimbs	0.597403	0.597403		Dox	14	RHL_homolat	0.702703	0.702703
Con	10	L-R_hindlimbs	0.61194	0.61194		Dox	14	RHL_homolat	0.857143	0.857143
Con	10	L-R_hindlimbs	0.5	0.5		Dox	14	RHL_homolat	0.428571	0.571429
Con	10	L-R_hindlimbs	0.675	0.675		Dox	14	RHL_homolat	0.738095	0.738095
Con	10	L-R_hindlimbs	0.637681	0.637681		Dox	14	RHL_homolat	0.693548	0.693548
Con	10	L-R_hindlimbs	0.671642	0.671642		Dox	14	RHL_homolat	0.581395	0.581395
Con	10	L-R_hindlimbs	0.568627	0.568627		Dox	14	RHL_homolat	0.642857	0.642857
Con	10	L-R_hindlimbs	0.506849	0.506849		Dox	14	RHL_homolat	0.685714	0.685714
Con	12	L-R_hindlimbs	0.5	0.5		Dox	15	RHL_homolat	0.8	0.8
Con	12	L-R_hindlimbs	0.545455	0.545455		Dox	15	RHL_homolat	0.566038	0.566038
Con	12	L-R_hindlimbs	0.52381	0.52381		Dox	15	RHL_homolat	0.769231	0.769231
Con	12	L-R_hindlimbs	0.55	0.55		Dox	15	RHL_homolat	0.694444	0.694444
Con	12	L-R_hindlimbs	0.5	0.5		Dox	15	RHL_homolat	0.6875	0.6875
Con	12	L-R_hindlimbs	0.5	0.5		Dox	15	RHL_homolat	0.857143	0.857143
Con	12	L-R_hindlimbs	0.5	0.5		Dox	15	RHL_homolat	0.731707	0.731707
Con	12	L-R_hindlimbs	0.5	0.5		Dox	15	RHL_homolat	0.641026	0.641026
Con	12	L-R_hindlimbs	0.380952	0.619048		Dox	15	RHL_homolat	0.833333	0.833333
Con	12	L-R_hindlimbs	0.428571	0.571429		Dox	15	RHL_homolat	0.6	0.6
Con	12	L-R_hindlimbs	0.435897	0.564103		Dox	15	RHL_homolat	0.656716	0.656716
Con	12	L-R_hindlimbs	0.702703	0.702703		Dox	15	RHL_homolat	0.462687	0.537313
Con	12	L-R_hindlimbs	0.511628	0.511628		Dox	15	RHL_homolat	0.818182	0.818182
Con	12	L-R_hindlimbs	0.571429	0.571429		Dox	15	RHL_homolat	0.651163	0.651163
Con	12	L-R_hindlimbs	0.37037	0.62963		Dox	15	RHL_homolat	0.758621	0.758621
Con	12	L-R_hindlimbs	0.689655	0.689655		Dox	15	RHL_homolat	0.813559	0.813559
Con	12	L-R_hindlimbs	0.526316	0.526316		Dox	15	RHL_homolat	0.810811	0.810811
Con	12	L-R_hindlimbs	0.378788	0.621212		Dox	15	RHL_homolat	0.684211	0.684211
Con	13	L-R_hindlimbs	0.4	0.6		Dox	16	RHL_homolat	0.714286	0.714286
Con	13	L-R_hindlimbs	0.529412	0.529412		Dox	16	RHL_homolat	0.704545	0.704545
Con	13	L-R_hindlimbs	0.583333	0.583333		Dox	16	RHL_homolat	0.547619	0.547619
Con	13	L-R_hindlimbs	0.5	0.5		Dox	16	RHL_homolat	0.707317	0.707317
Con	13	L-R_hindlimbs	0.454545	0.545455		Dox	16	RHL_homolat	0.482143	0.517857
Con	13	L-R_hindlimbs	0.666667	0.666667		Dox	16	RHL_homolat	0.823529	0.823529
Con	13	L-R_hindlimbs	0.52381	0.52381		Dox	16	RHL_homolat	0.604167	0.604167
Con	13	L-R_hindlimbs	0.45	0.55		Dox	16	RHL_homolat	0.622222	0.622222
Con	13	L-R_hindlimbs	0.473684	0.526316		Dox	16	RHL_homolat	0.702703	0.702703
Con	13	L-R_hindlimbs	0.666667	0.666667		Dox	16	RHL_homolat	0.787234	0.787234
Con	13	L-R_hindlimbs	0.466667	0.533333		Dox	16	RHL_homolat	0.6	0.6
Con	13	L-R_hindlimbs	0.456522	0.543478		Dox	16	RHL_homolat	0.754717	0.754717
Con	13	L-R_hindlimbs	0.3125	0.6875		Dox	16	RHL_homolat	0.78125	0.78125
Con	13	L-R_hindlimbs	0.392857	0.607143		Dox	17	RHL_homolat	0.552632	0.552632
Con	13	L-R_hindlimbs	0.310345	0.689655		Dox	17	RHL_homolat	0.756098	0.756098
Con	13	L-R_hindlimbs	0.578947	0.578947		Dox	17	RHL_homolat	0.8	0.8
Con	14	L-R_hindlimbs	0.5	0.5		Dox	17	RHL_homolat	0.581395	0.581395
Con	14	L-R_hindlimbs	0.521739	0.521739		Dox	17	RHL_homolat	0.5	0.5
Con	14	L-R_hindlimbs	0.571429	0.571429		Dox	17	RHL_homolat	0.636364	0.636364
Con	14	L-R_hindlimbs	0.454545	0.545455		Dox	17	RHL_homolat	0.516667	0.516667
Con	14	L-R_hindlimbs	0.47619	0.52381		Dox	17	RHL_homolat	0.577778	0.577778
Con	14	L-R_hindlimbs	0.5	0.5		Dox	17	RHL_homolat	0.33871	0.66129
Con	14	L-R_hindlimbs	0.5	0.5		Dox	17	RHL_homolat	0.552632	0.552632
Con	14	L-R_hindlimbs	0.478261	0.521739		Dox	17	RHL_homolat	0.641026	0.641026
Con	14	L-R_hindlimbs	0.434783	0.565217		Dox	17	RHL_homolat	0.323529	0.676471
Con	14	L-R_hindlimbs	0.625	0.625		Dox	17	RHL_homolat	0.791667	0.791667
Con	14	L-R_hindlimbs	0.370787	0.629213		Dox	17	RHL_homolat	0.536585	0.536585
Con	14	L-R_hindlimbs	0.581081	0.581081		Dox	18	RHL_homolat	0.757576	0.757576
Con	14	L-R_hindlimbs	0.606061	0.606061		Dox	18	RHL_homolat	0.708333	0.708333
Con	14	L-R_hindlimbs	0.560976	0.560976		Dox	18	RHL_homolat	0.666667	0.666667
Con	14	L-R_hindlimbs	0.45283	0.54717		Dox	18	RHL_homolat	0.775	0.775
Con	14	L-R_hindlimbs	0.525	0.525		Dox	18	RHL_homolat	0.830769	0.830769
Con	14	L-R_hindlimbs	0.441176	0.558824		Dox	18	RHL_homolat	0.674419	0.674419
Con	14	L-R_hindlimbs	0.547619	0.547619		Dox	18	RHL_homolat	0.755556	0.755556
Con	14	L-R_hindlimbs	0.488889	0.511111		Dox	18	RHL_homolat	0.866667	0.866667
Con	15	L-R_hindlimbs	0.521739	0.521739		Dox	1	RHL_heterolat	0.130435	0.130435
Con	15	L-R_hindlimbs	0.444444	0.555556		Dox	1	RHL_heterolat	0.0526316	0.0526316
Con	15	L-R_hindlimbs	0.45	0.55		Dox	1	RHL_heterolat	0.139535	0.139535
Con	15	L-R_hindlimbs	0.47619	0.52381		Dox	1	RHL_heterolat	0.140351	0.140351
Con	15	L-R_hindlimbs	0.512821	0.512821		Dox	1	RHL_heterolat	0.047619	0.047619
Con	15	L-R_hindlimbs	0.328125	0.671875		Dox	1	RHL_heterolat	0.136364	0.136364
Con	15	L-R_hindlimbs	0.585366	0.585366		Dox	1	RHL_heterolat	0.145455	0.145455
Con	15	L-R_hindlimbs	0.551724	0.551724		Dox	1	RHL_heterolat	0.261905	0.261905
Con	15	L-R_hindlimbs	0.395349	0.604651		Dox	1	RHL_heterolat	0.0833333	0.0833333
Con	15	L-R_hindlimbs	0.482759	0.517241		Dox	1	RHL_heterolat	0.129032	0.129032
Con	15	L-R_hindlimbs	0.5	0.5		Dox	1	RHL_heterolat	0.145161	0.145161
Con	15	L-R_hindlimbs	0.462963	0.537037		Dox	1	RHL_heterolat	0.06	0.06
Con	15	L-R_hindlimbs	0.568966	0.568966		Dox	2	RHL_heterolat	0.0833333	0.0833333
Con	15	L-R_hindlimbs	0.545455	0.545455		Dox	2	RHL_heterolat	0.0714286	0.0714286
Con	15	L-R_hindlimbs	0.557692	0.557692		Dox	2	RHL_heterolat	0.0333333	0.0333333
Con	15	L-R_hindlimbs	0.581081	0.581081		Dox	2	RHL_heterolat	0.903226	0.0967742
Con	15	L-R_hindlimbs	0.521739	0.521739		Dox	2	RHL_heterolat	0.16129	0.16129
Con	15	L-R_hindlimbs	0.535211	0.535211		Dox	2	RHL_heterolat	0.0769231	0.0769231
Con	15	L-R_hindlimbs	0.535714	0.535714		Dox	2	RHL_heterolat	0.0606061	0.0606061
Con	15	L-R_hindlimbs	0.479167	0.520833		Dox	2	RHL_heterolat	0.0888889	0.0888889
Con	15	L-R_hindlimbs	0.5	0.5		Dox	2	RHL_heterolat	0.122807	0.122807
Con	15	L-R_hindlimbs	0.607843	0.607843		Dox	2	RHL_heterolat	0.111111	0.111111
Con	15	L-R_hindlimbs	0.471429	0.528571		Dox	2	RHL_heterolat	0.152778	0.152778
Con	15	L-R_hindlimbs	0.574468	0.574468		Dox	7	RHL_heterolat	0.181818	0.181818
Con	15	L-R_hindlimbs	0.569444	0.569444		Dox	7	RHL_heterolat	0.0869565	0.0869565
Con	15	L-R_hindlimbs	0.425926	0.574074		Dox	7	RHL_heterolat	0.217391	0.217391
Con	15	L-R_hindlimbs	0.653846	0.653846		Dox	7	RHL_heterolat	0.962963	0.037037
Con	15	L-R_hindlimbs	0.56	0.56		Dox	7	RHL_heterolat	0.0740741	0.0740741
Con	16	L-R_hindlimbs	0.555556	0.555556		Dox	7	RHL_heterolat	0.916667	0.0833333
Con	16	L-R_hindlimbs	0.411765	0.588235		Dox	7	RHL_heterolat	0.125	0.125
Con	16	L-R_hindlimbs	0.625	0.625		Dox	7	RHL_heterolat	0.0869565	0.0869565
Con	16	L-R_hindlimbs	0.5	0.5		Dox	7	RHL_heterolat	0.0769231	0.0769231
Con	16	L-R_hindlimbs	0.5	0.5		Dox	7	RHL_heterolat	0.186047	0.186047
Con	16	L-R_hindlimbs	0.409091	0.590909		Dox	7	RHL_heterolat	0.208333	0.208333
Con	16	L-R_hindlimbs	0.538462	0.538462		Dox	7	RHL_heterolat	0.170732	0.170732
Con	16	L-R_hindlimbs	0.355932	0.644068		Dox	7	RHL_heterolat	0.137255	0.137255
Con	16	L-R_hindlimbs	0.438596	0.561404		Dox	7	RHL_heterolat	0.0263158	0.0263158
Con	16	L-R_hindlimbs	0.596491	0.596491		Dox	7	RHL_heterolat	0.118644	0.118644
Con	16	L-R_hindlimbs	0.651163	0.651163		Dox	8	RHL_heterolat	0.952381	0.047619
Con	16	L-R_hindlimbs	0.55814	0.55814		Dox	8	RHL_heterolat	0.047619	0.047619
Con	16	L-R_hindlimbs	0.609756	0.609756		Dox	8	RHL_heterolat	0.12	0.12
Con	16	L-R_hindlimbs	0.425	0.575		Dox	8	RHL_heterolat	0.025641	0.025641
Con	16	L-R_hindlimbs	0.415094	0.584906		Dox	8	RHL_heterolat	0.0851064	0.0851064
Con	16	L-R_hindlimbs	0.512821	0.512821		Dox	8	RHL_heterolat	0.111111	0.111111
Con	16	L-R_hindlimbs	0.571429	0.571429		Dox	8	RHL_heterolat	0.133333	0.133333
Con	16	L-R_hindlimbs	0.534884	0.534884		Dox	9	RHL_heterolat	0.173913	0.173913
Con	17	L-R_hindlimbs	0.470588	0.529412		Dox	9	RHL_heterolat	0.115385	0.115385
Con	17	L-R_hindlimbs	0.454545	0.545455		Dox	9	RHL_heterolat	0.958333	0.0416667
Con	17	L-R_hindlimbs	0.44	0.56		Dox	9	RHL_heterolat	0.925926	0.0740741
Con	17	L-R_hindlimbs	0.521739	0.521739		Dox	9	RHL_heterolat	0.0434783	0.0434783
Con	17	L-R_hindlimbs	0.478261	0.521739		Dox	9	RHL_heterolat	0.131148	0.131148
Con	17	L-R_hindlimbs	0.454545	0.545455		Dox	9	RHL_heterolat	0.218182	0.218182
Con	17	L-R_hindlimbs	0.47619	0.52381		Dox	9	RHL_heterolat	0.25	0.25
Con	17	L-R_hindlimbs	0.625	0.625		Dox	9	RHL_heterolat	0.255814	0.255814
Con	17	L-R_hindlimbs	0.489796	0.510204		Dox	9	RHL_heterolat	0.183333	0.183333
Con	17	L-R_hindlimbs	0.5	0.5		Dox	9	RHL_heterolat	0.163636	0.163636
Con	17	L-R_hindlimbs	0.371429	0.628571		Dox	9	RHL_heterolat	0.18	0.18
Con	17	L-R_hindlimbs	0.351351	0.648649		Dox	10	RHL_heterolat	0.956522	0.0434783
Con	17	L-R_hindlimbs	0.36	0.64		Dox	10	RHL_heterolat	0.217391	0.217391
Con	17	L-R_hindlimbs	0.47619	0.52381		Dox	10	RHL_heterolat	0.0789474	0.0789474
Con	17	L-R_hindlimbs	0.431818	0.568182		Dox	10	RHL_heterolat	0.15	0.15
Con	17	L-R_hindlimbs	0.483871	0.516129		Dox	10	RHL_heterolat	0.181818	0.181818
Con	17	L-R_hindlimbs	0.325	0.675		Dox	10	RHL_heterolat	0.128205	0.128205
Con	17	L-R_hindlimbs	0.5	0.5		Dox	10	RHL_heterolat	0.0357143	0.0357143
Con	17	L-R_hindlimbs	0.511628	0.511628		Dox	10	RHL_heterolat	0.153846	0.153846
Con	17	L-R_hindlimbs	0.432432	0.567568		Dox	10	RHL_heterolat	0.175439	0.175439
Con	17	L-R_hindlimbs	0.5	0.5		Dox	10	RHL_heterolat	0.403509	0.403509
Con	17	L-R_hindlimbs	0.589744	0.589744		Dox	10	RHL_heterolat	0.16	0.16
Con	18	L-R_hindlimbs	0.5	0.5		Dox	10	RHL_heterolat	0.22449	0.22449
Con	18	L-R_hindlimbs	0.608696	0.608696		Dox	10	RHL_heterolat	0.130435	0.130435
Con	18	L-R_hindlimbs	0.526316	0.526316		Dox	10	RHL_heterolat	0.304348	0.304348
Con	18	L-R_hindlimbs	0.521739	0.521739		Dox	12	RHL_heterolat	0.212121	0.212121
Con	18	L-R_hindlimbs	0.526316	0.526316		Dox	12	RHL_heterolat	0.108108	0.108108
Con	18	L-R_hindlimbs	0.6	0.6		Dox	12	RHL_heterolat	1	0
Con	18	L-R_hindlimbs	0.545455	0.545455		Dox	12	RHL_heterolat	0.147059	0.147059
Con	18	L-R_hindlimbs	0.431373	0.568627		Dox	12	RHL_heterolat	0.116883	0.116883
Con	18	L-R_hindlimbs	0.488372	0.511628		Dox	13	RHL_heterolat	0.015625	0.015625
Con	18	L-R_hindlimbs	0.375	0.625		Dox	13	RHL_heterolat	0.0769231	0.0769231
Con	18	L-R_hindlimbs	0.436364	0.563636		Dox	13	RHL_heterolat	0.135593	0.135593
Con	18	L-R_hindlimbs	0.545455	0.545455		Dox	13	RHL_heterolat	0.131579	0.131579
Con	18	L-R_hindlimbs	0.37037	0.62963		Dox	13	RHL_heterolat	0.108696	0.108696
Con	18	L-R_hindlimbs	0.536585	0.536585		Dox	13	RHL_heterolat	0.0566038	0.0566038
Con	18	L-R_hindlimbs	0.571429	0.571429		Dox	14	RHL_heterolat	0.206897	0.206897
Con	18	L-R_hindlimbs	0.533333	0.533333		Dox	14	RHL_heterolat	0.176471	0.176471
Con	18	L-R_hindlimbs	0.487805	0.512195		Dox	14	RHL_heterolat	0.146341	0.146341
Con	18	L-R_hindlimbs	0.522727	0.522727		Dox	14	RHL_heterolat	0.191489	0.191489
Con	18	L-R_hindlimbs	0.583333	0.583333		Dox	14	RHL_heterolat	0.078125	0.078125
Con	18	L-R_hindlimbs	0.486486	0.513514		Dox	14	RHL_heterolat	0.189189	0.189189
Con	18	L-R_hindlimbs	0.428571	0.571429		Dox	14	RHL_heterolat	0.210526	0.210526
Con	1	RHL_homolat	0.6	0.6		Dox	14	RHL_heterolat	0.136364	0.136364
Con	1	RHL_homolat	0.6	0.6		Dox	14	RHL_heterolat	0.0810811	0.0810811
Con	1	RHL_homolat	0.55	0.55		Dox	14	RHL_heterolat	0.142857	0.142857
Con	1	RHL_homolat	0.608696	0.608696		Dox	14	RHL_heterolat	0.2	0.2
Con	1	RHL_homolat	0.625	0.625		Dox	14	RHL_heterolat	0.119048	0.119048
Con	1	RHL_homolat	0.52	0.52		Dox	14	RHL_heterolat	0.225806	0.225806
Con	1	RHL_homolat	0.653846	0.653846		Dox	14	RHL_heterolat	0.116279	0.116279
Con	1	RHL_homolat	0.714286	0.714286		Dox	14	RHL_heterolat	0.166667	0.166667
Con	1	RHL_homolat	0.761905	0.761905		Dox	14	RHL_heterolat	0.0571429	0.0571429
Con	1	RHL_homolat	0.64	0.64		Dox	15	RHL_heterolat	0.25	0.25
Con	1	RHL_homolat	0.590909	0.590909		Dox	15	RHL_heterolat	0.0754717	0.0754717
Con	1	RHL_homolat	0.653846	0.653846		Dox	15	RHL_heterolat	0.138462	0.138462
Con	1	RHL_homolat	0.631579	0.631579		Dox	15	RHL_heterolat	0.138889	0.138889
Con	1	RHL_homolat	0.578947	0.578947		Dox	15	RHL_heterolat	0.09375	0.09375
Con	1	RHL_homolat	0.590909	0.590909		Dox	15	RHL_heterolat	0.142857	0.142857
Con	1	RHL_homolat	0.583333	0.583333		Dox	15	RHL_heterolat	0.268293	0.268293
Con	1	RHL_homolat	0.727273	0.727273		Dox	15	RHL_heterolat	0.25641	0.25641
Con	1	RHL_homolat	0.604167	0.604167		Dox	15	RHL_heterolat	0.527778	0.472222
Con	1	RHL_homolat	0.625	0.625		Dox	15	RHL_heterolat	0.111111	0.111111
Con	1	RHL_homolat	0.822785	0.822785		Dox	15	RHL_heterolat	0.0857143	0.0857143
Con	1	RHL_homolat	0.443038	0.556962		Dox	15	RHL_heterolat	0.119403	0.119403
Con	1	RHL_homolat	0.390625	0.609375		Dox	15	RHL_heterolat	0.439394	0.439394
Con	1	RHL_homolat	0.719512	0.719512		Dox	15	RHL_heterolat	0.136364	0.136364
Con	1	RHL_homolat	0.608696	0.608696		Dox	15	RHL_heterolat	0.209302	0.209302
Con	2	RHL_homolat	0.72	0.72		Dox	15	RHL_heterolat	0.103448	0.103448
Con	2	RHL_homolat	0.62963	0.62963		Dox	15	RHL_heterolat	0.169492	0.169492
Con	2	RHL_homolat	0.730769	0.730769		Dox	15	RHL_heterolat	0.554054	0.445946
Con	2	RHL_homolat	0.642857	0.642857		Dox	16	RHL_heterolat	0.257143	0.257143
Con	2	RHL_homolat	0.692308	0.692308		Dox	16	RHL_heterolat	0.340909	0.340909
Con	2	RHL_homolat	0.714286	0.714286		Dox	16	RHL_heterolat	0.214286	0.214286
Con	2	RHL_homolat	0.785714	0.785714		Dox	16	RHL_heterolat	0.219512	0.219512
Con	2	RHL_homolat	0.615385	0.615385		Dox	16	RHL_heterolat	0.125	0.125
Con	2	RHL_homolat	0.68	0.68		Dox	16	RHL_heterolat	0.323529	0.323529
Con	2	RHL_homolat	0.653846	0.653846		Dox	16	RHL_heterolat	0.166667	0.166667
Con	2	RHL_homolat	0.6	0.6		Dox	16	RHL_heterolat	0.266667	0.266667
Con	2	RHL_homolat	0.583333	0.583333		Dox	16	RHL_heterolat	0.0810811	0.0810811
Con	2	RHL_homolat	0.608696	0.608696		Dox	16	RHL_heterolat	0.126761	0.126761
Con	2	RHL_homolat	0.375	0.625		Dox	16	RHL_heterolat	0.106383	0.106383
Con	2	RHL_homolat	0.763636	0.763636		Dox	16	RHL_heterolat	0.0895522	0.0895522
Con	2	RHL_homolat	0.606061	0.606061		Dox	16	RHL_heterolat	0.0943396	0.0943396
Con	2	RHL_homolat	0.675676	0.675676		Dox	17	RHL_heterolat	0.969697	0.030303
Con	2	RHL_homolat	0.722222	0.722222		Dox	17	RHL_heterolat	0.170732	0.170732
Con	2	RHL_homolat	0.714286	0.714286		Dox	17	RHL_heterolat	0.0857143	0.0857143
Con	7	RHL_homolat	0.588235	0.588235		Dox	17	RHL_heterolat	0.947368	0.0526316
Con	7	RHL_homolat	0.7	0.7		Dox	17	RHL_heterolat	0.0789474	0.0789474
Con	7	RHL_homolat	0.695652	0.695652		Dox	17	RHL_heterolat	0.138462	0.138462
Con	7	RHL_homolat	0.736842	0.736842		Dox	17	RHL_heterolat	0.121212	0.121212
Con	7	RHL_homolat	0.666667	0.666667		Dox	17	RHL_heterolat	0.0666667	0.0666667
Con	7	RHL_homolat	0.695652	0.695652		Dox	17	RHL_heterolat	0.2	0.2
Con	7	RHL_homolat	0.644444	0.644444		Dox	17	RHL_heterolat	0.0540541	0.0540541
Con	7	RHL_homolat	0.538462	0.538462		Dox	17	RHL_heterolat	0.0526316	0.0526316
Con	7	RHL_homolat	0.333333	0.666667		Dox	17	RHL_heterolat	0.128205	0.128205
Con	7	RHL_homolat	0.566038	0.566038		Dox	17	RHL_heterolat	0.102941	0.102941
Con	7	RHL_homolat	0.777778	0.777778		Dox	17	RHL_heterolat	0.145833	0.145833
Con	8	RHL_homolat	0.761905	0.761905		Dox	18	RHL_heterolat	0.272727	0.272727
Con	8	RHL_homolat	0.8	0.8		Dox	18	RHL_heterolat	0.1875	0.1875
Con	8	RHL_homolat	0.75	0.75		Dox	18	RHL_heterolat	0.214286	0.214286
Con	8	RHL_homolat	0.842105	0.842105		Dox	18	RHL_heterolat	0.3	0.3
Con	8	RHL_homolat	0.764706	0.764706		Dox	18	RHL_heterolat	0.123077	0.123077
Con	8	RHL_homolat	0.652174	0.652174		Dox	18	RHL_heterolat	0.255814	0.255814
Con	8	RHL_homolat	0.764706	0.764706		Dox	18	RHL_heterolat	0.288889	0.288889
Con	8	RHL_homolat	0.73913	0.73913		Dox	18	RHL_heterolat	0.311111	0.311111
Con	8	RHL_homolat	0.681818	0.681818
Con	8	RHL_homolat	0.764706	0.764706
Con	8	RHL_homolat	0.727273	0.727273
Con	8	RHL_homolat	0.611111	0.611111
Con	8	RHL_homolat	0.611111	0.611111
Con	8	RHL_homolat	0.647059	0.647059
Con	8	RHL_homolat	0.555556	0.555556
Con	8	RHL_homolat	0.578947	0.578947
Con	8	RHL_homolat	0.588235	0.588235
Con	8	RHL_homolat	0.5625	0.5625
Con	8	RHL_homolat	0.684211	0.684211
Con	8	RHL_homolat	0.657895	0.657895
Con	8	RHL_homolat	0.54717	0.54717
Con	8	RHL_homolat	0.707317	0.707317
Con	8	RHL_homolat	0.430769	0.569231
Con	9	RHL_homolat	0.65	0.65
Con	9	RHL_homolat	0.533333	0.533333
Con	9	RHL_homolat	0.625	0.625
Con	9	RHL_homolat	0.666667	0.666667
Con	9	RHL_homolat	0.722222	0.722222
Con	9	RHL_homolat	0.647059	0.647059
Con	9	RHL_homolat	0.666667	0.666667
Con	9	RHL_homolat	0.6875	0.6875
Con	9	RHL_homolat	0.714286	0.714286
Con	9	RHL_homolat	0.730769	0.730769
Con	9	RHL_homolat	0.52	0.52
Con	9	RHL_homolat	0.636364	0.636364
Con	9	RHL_homolat	0.65	0.65
Con	9	RHL_homolat	0.631579	0.631579
Con	9	RHL_homolat	0.727273	0.727273
Con	9	RHL_homolat	0.705882	0.705882
Con	9	RHL_homolat	0.55814	0.55814
Con	9	RHL_homolat	0.275862	0.724138
Con	9	RHL_homolat	0.638298	0.638298
Con	9	RHL_homolat	0.627907	0.627907
Con	9	RHL_homolat	0.666667	0.666667
Con	9	RHL_homolat	0.609756	0.609756
Con	10	RHL_homolat	0.846154	0.846154
Con	10	RHL_homolat	0.730769	0.730769
Con	10	RHL_homolat	0.782609	0.782609
Con	10	RHL_homolat	0.464286	0.535714
Con	10	RHL_homolat	0.678571	0.678571
Con	10	RHL_homolat	0.85	0.85
Con	10	RHL_homolat	0.72	0.72
Con	10	RHL_homolat	0.833333	0.833333
Con	10	RHL_homolat	0.727273	0.727273
Con	10	RHL_homolat	0.782609	0.782609
Con	10	RHL_homolat	0.785714	0.785714
Con	10	RHL_homolat	0.774194	0.774194
Con	10	RHL_homolat	0.6875	0.6875
Con	10	RHL_homolat	0.75	0.75
Con	10	RHL_homolat	0.8	0.8
Con	10	RHL_homolat	0.809524	0.809524
Con	10	RHL_homolat	0.659091	0.659091
Con	10	RHL_homolat	0.742857	0.742857
Con	10	RHL_homolat	0.658537	0.658537
Con	10	RHL_homolat	0.795455	0.795455
Con	10	RHL_homolat	0.6	0.6
Con	10	RHL_homolat	0.736842	0.736842
Con	10	RHL_homolat	0.701299	0.701299
Con	10	RHL_homolat	0.835821	0.835821
Con	10	RHL_homolat	0.814815	0.814815
Con	10	RHL_homolat	0.8125	0.8125
Con	10	RHL_homolat	0.811594	0.811594
Con	10	RHL_homolat	0.820896	0.820896
Con	10	RHL_homolat	0.803922	0.803922
Con	10	RHL_homolat	0.753425	0.753425
Con	12	RHL_homolat	0.65	0.65
Con	12	RHL_homolat	0.727273	0.727273
Con	12	RHL_homolat	0.714286	0.714286
Con	12	RHL_homolat	0.8	0.8
Con	12	RHL_homolat	0.75	0.75
Con	12	RHL_homolat	0.727273	0.727273
Con	12	RHL_homolat	0.7	0.7
Con	12	RHL_homolat	0.590909	0.590909
Con	12	RHL_homolat	0.619048	0.619048
Con	12	RHL_homolat	0.619048	0.619048
Con	12	RHL_homolat	0.589744	0.589744
Con	12	RHL_homolat	0.824324	0.824324
Con	12	RHL_homolat	0.674419	0.674419
Con	12	RHL_homolat	0.714286	0.714286
Con	12	RHL_homolat	0.518519	0.518519
Con	12	RHL_homolat	0.827586	0.827586
Con	12	RHL_homolat	0.657895	0.657895
Con	12	RHL_homolat	0.439394	0.560606
Con	13	RHL_homolat	0.733333	0.733333
Con	13	RHL_homolat	0.823529	0.823529
Con	13	RHL_homolat	0.75	0.75
Con	13	RHL_homolat	0.75	0.75
Con	13	RHL_homolat	0.681818	0.681818
Con	13	RHL_homolat	0.809524	0.809524
Con	13	RHL_homolat	0.809524	0.809524
Con	13	RHL_homolat	0.7	0.7
Con	13	RHL_homolat	0.526316	0.526316
Con	13	RHL_homolat	0.807018	0.807018
Con	13	RHL_homolat	0.533333	0.533333
Con	13	RHL_homolat	0.543478	0.543478
Con	13	RHL_homolat	0.395833	0.604167
Con	13	RHL_homolat	0.464286	0.535714
Con	13	RHL_homolat	0.448276	0.551724
Con	13	RHL_homolat	0.526316	0.526316
Con	14	RHL_homolat	0.636364	0.636364
Con	14	RHL_homolat	0.652174	0.652174
Con	14	RHL_homolat	0.761905	0.761905
Con	14	RHL_homolat	0.727273	0.727273
Con	14	RHL_homolat	0.761905	0.761905
Con	14	RHL_homolat	0.681818	0.681818
Con	14	RHL_homolat	0.727273	0.727273
Con	14	RHL_homolat	0.73913	0.73913
Con	14	RHL_homolat	0.652174	0.652174
Con	14	RHL_homolat	0.6875	0.6875
Con	14	RHL_homolat	0.797753	0.797753
Con	14	RHL_homolat	0.483146	0.516854
Con	14	RHL_homolat	0.757576	0.757576
Con	14	RHL_homolat	0.707317	0.707317
Con	14	RHL_homolat	0.528302	0.528302
Con	14	RHL_homolat	0.625	0.625
Con	14	RHL_homolat	0.558824	0.558824
Con	14	RHL_homolat	0.377049	0.622951
Con	14	RHL_homolat	0.403509	0.596491
Con	15	RHL_homolat	0.73913	0.73913
Con	15	RHL_homolat	0.722222	0.722222
Con	15	RHL_homolat	0.65	0.65
Con	15	RHL_homolat	0.666667	0.666667
Con	15	RHL_homolat	0.641026	0.641026
Con	15	RHL_homolat	0.71875	0.71875
Con	15	RHL_homolat	0.792683	0.792683
Con	15	RHL_homolat	0.741379	0.741379
Con	15	RHL_homolat	0.744186	0.744186
Con	15	RHL_homolat	0.741379	0.741379
Con	15	RHL_homolat	0.76	0.76
Con	15	RHL_homolat	0.814815	0.814815
Con	15	RHL_homolat	0.62963	0.62963
Con	15	RHL_homolat	0.758621	0.758621
Con	15	RHL_homolat	0.712121	0.712121
Con	15	RHL_homolat	0.730769	0.730769
Con	15	RHL_homolat	0.743243	0.743243
Con	15	RHL_homolat	0.76087	0.76087
Con	15	RHL_homolat	0.788732	0.788732
Con	15	RHL_homolat	0.696429	0.696429
Con	15	RHL_homolat	0.76	0.76
Con	15	RHL_homolat	0.764706	0.764706
Con	15	RHL_homolat	0.685714	0.685714
Con	15	RHL_homolat	0.744681	0.744681
Con	15	RHL_homolat	0.736111	0.736111
Con	15	RHL_homolat	0.666667	0.666667
Con	15	RHL_homolat	0.717949	0.717949
Con	15	RHL_homolat	0.72	0.72
Con	16	RHL_homolat	0.666667	0.666667
Con	16	RHL_homolat	0.647059	0.647059
Con	16	RHL_homolat	0.75	0.75
Con	16	RHL_homolat	0.722222	0.722222
Con	16	RHL_homolat	0.65	0.65
Con	16	RHL_homolat	0.5	0.5
Con	16	RHL_homolat	0.717949	0.717949
Con	16	RHL_homolat	0.508475	0.508475
Con	16	RHL_homolat	0.614035	0.614035
Con	16	RHL_homolat	0.754386	0.754386
Con	16	RHL_homolat	0.604651	0.604651
Con	16	RHL_homolat	0.651163	0.651163
Con	16	RHL_homolat	0.756098	0.756098
Con	16	RHL_homolat	0.575	0.575
Con	16	RHL_homolat	0.54717	0.54717
Con	16	RHL_homolat	0.717949	0.717949
Con	16	RHL_homolat	0.657143	0.657143
Con	16	RHL_homolat	0.674419	0.674419
Con	17	RHL_homolat	0.764706	0.764706
Con	17	RHL_homolat	0.727273	0.727273
Con	17	RHL_homolat	0.72	0.72
Con	17	RHL_homolat	0.782609	0.782609
Con	17	RHL_homolat	0.695652	0.695652
Con	17	RHL_homolat	0.727273	0.727273
Con	17	RHL_homolat	0.809524	0.809524
Con	17	RHL_homolat	0.75	0.75
Con	17	RHL_homolat	0.77551	0.77551
Con	17	RHL_homolat	0.782609	0.782609
Con	17	RHL_homolat	0.685714	0.685714
Con	17	RHL_homolat	0.567568	0.567568
Con	17	RHL_homolat	0.52	0.52
Con	17	RHL_homolat	0.642857	0.642857
Con	17	RHL_homolat	0.636364	0.636364
Con	17	RHL_homolat	0.806452	0.806452
Con	17	RHL_homolat	0.525	0.525
Con	17	RHL_homolat	0.7	0.7
Con	17	RHL_homolat	0.534884	0.534884
Con	17	RHL_homolat	0.459459	0.540541
Con	17	RHL_homolat	0.5625	0.5625
Con	17	RHL_homolat	0.74359	0.74359
Con	18	RHL_homolat	0.75	0.75
Con	18	RHL_homolat	0.826087	0.826087
Con	18	RHL_homolat	0.842105	0.842105
Con	18	RHL_homolat	0.73913	0.73913
Con	18	RHL_homolat	0.789474	0.789474
Con	18	RHL_homolat	0.75	0.75
Con	18	RHL_homolat	0.636364	0.636364
Con	18	RHL_homolat	0.627451	0.627451
Con	18	RHL_homolat	0.72093	0.72093
Con	18	RHL_homolat	0.791667	0.791667
Con	18	RHL_homolat	0.818182	0.818182
Con	18	RHL_homolat	0.836364	0.836364
Con	18	RHL_homolat	0.537037	0.537037
Con	18	RHL_homolat	0.731707	0.731707
Con	18	RHL_homolat	0.836735	0.836735
Con	18	RHL_homolat	0.666667	0.666667
Con	18	RHL_homolat	0.682927	0.682927
Con	18	RHL_homolat	0.659091	0.659091
Con	18	RHL_homolat	0.520833	0.520833
Con	18	RHL_homolat	0.783784	0.783784
Con	18	RHL_homolat	0.642857	0.642857
Con	1	RHL_heterolat	0.16	0.16
Con	1	RHL_heterolat	0.2	0.2
Con	1	RHL_heterolat	1	0
Con	1	RHL_heterolat	0.0434783	0.0434783
Con	1	RHL_heterolat	0.208333	0.208333
Con	1	RHL_heterolat	0.04	0.04
Con	1	RHL_heterolat	0.153846	0.153846
Con	1	RHL_heterolat	0.238095	0.238095
Con	1	RHL_heterolat	0.190476	0.190476
Con	1	RHL_heterolat	0.08	0.08
Con	1	RHL_heterolat	0.961538	0.0384615
Con	1	RHL_heterolat	0.115385	0.115385
Con	1	RHL_heterolat	0.315789	0.315789
Con	1	RHL_heterolat	0.0526316	0.0526316
Con	1	RHL_heterolat	0.136364	0.136364
Con	1	RHL_heterolat	0.125	0.125
Con	1	RHL_heterolat	0.227273	0.227273
Con	1	RHL_heterolat	0.0625	0.0625
Con	1	RHL_heterolat	0.225	0.225
Con	1	RHL_heterolat	1	0
Con	1	RHL_heterolat	0.921875	0.078125
Con	1	RHL_heterolat	0.97561	0.0243902
Con	1	RHL_heterolat	0.146341	0.146341
Con	1	RHL_heterolat	0.108696	0.108696
Con	2	RHL_heterolat	0.16	0.16
Con	2	RHL_heterolat	0.148148	0.148148
Con	2	RHL_heterolat	0.153846	0.153846
Con	2	RHL_heterolat	0.178571	0.178571
Con	2	RHL_heterolat	0.192308	0.192308
Con	2	RHL_heterolat	0.178571	0.178571
Con	2	RHL_heterolat	1	0
Con	2	RHL_heterolat	0.153846	0.153846
Con	2	RHL_heterolat	0.2	0.2
Con	2	RHL_heterolat	0.115385	0.115385
Con	2	RHL_heterolat	0.04	0.04
Con	2	RHL_heterolat	0.208333	0.208333
Con	2	RHL_heterolat	0.130435	0.130435
Con	2	RHL_heterolat	0.181818	0.181818
Con	2	RHL_heterolat	0.109091	0.109091
Con	2	RHL_heterolat	0.151515	0.151515
Con	2	RHL_heterolat	0.162162	0.162162
Con	2	RHL_heterolat	0.185185	0.185185
Con	2	RHL_heterolat	0.214286	0.214286
Con	7	RHL_heterolat	0.176471	0.176471
Con	7	RHL_heterolat	0.1	0.1
Con	7	RHL_heterolat	0.26087	0.26087
Con	7	RHL_heterolat	0.0526316	0.0526316
Con	7	RHL_heterolat	0.04	0.04
Con	7	RHL_heterolat	0.142857	0.142857
Con	7	RHL_heterolat	0.133333	0.133333
Con	7	RHL_heterolat	0.230769	0.230769
Con	7	RHL_heterolat	0.90411	0.0958904
Con	7	RHL_heterolat	0.169811	0.169811
Con	7	RHL_heterolat	0.155556	0.155556
Con	8	RHL_heterolat	0.190476	0.190476
Con	8	RHL_heterolat	0.2	0.2
Con	8	RHL_heterolat	0.25	0.25
Con	8	RHL_heterolat	0.315789	0.315789
Con	8	RHL_heterolat	0.235294	0.235294
Con	8	RHL_heterolat	0.26087	0.26087
Con	8	RHL_heterolat	0.235294	0.235294
Con	8	RHL_heterolat	0.130435	0.130435
Con	8	RHL_heterolat	0.272727	0.272727
Con	8	RHL_heterolat	0.117647	0.117647
Con	8	RHL_heterolat	0.181818	0.181818
Con	8	RHL_heterolat	0.166667	0.166667
Con	8	RHL_heterolat	0.166667	0.166667
Con	8	RHL_heterolat	0.0588235	0.0588235
Con	8	RHL_heterolat	0.0555556	0.0555556
Con	8	RHL_heterolat	0.157895	0.157895
Con	8	RHL_heterolat	0.0588235	0.0588235
Con	8	RHL_heterolat	0.125	0.125
Con	8	RHL_heterolat	0.157895	0.157895
Con	8	RHL_heterolat	0.157895	0.157895
Con	8	RHL_heterolat	0.194444	0.194444
Con	8	RHL_heterolat	0.057971	0.057971
Con	8	RHL_heterolat	0.123077	0.123077
Con	9	RHL_heterolat	0.1	0.1
Con	9	RHL_heterolat	1	0
Con	9	RHL_heterolat	0.25	0.25
Con	9	RHL_heterolat	0.2	0.2
Con	9	RHL_heterolat	0.111111	0.111111
Con	9	RHL_heterolat	0.117647	0.117647
Con	9	RHL_heterolat	0.2	0.2
Con	9	RHL_heterolat	0.1875	0.1875
Con	9	RHL_heterolat	0.285714	0.285714
Con	9	RHL_heterolat	0.192308	0.192308
Con	9	RHL_heterolat	0.08	0.08
Con	9	RHL_heterolat	0.136364	0.136364
Con	9	RHL_heterolat	0.15	0.15
Con	9	RHL_heterolat	0.210526	0.210526
Con	9	RHL_heterolat	0.212121	0.212121
Con	9	RHL_heterolat	0.117647	0.117647
Con	9	RHL_heterolat	0.988506	0.0114943
Con	9	RHL_heterolat	0.0833333	0.0833333
Con	9	RHL_heterolat	0.0851064	0.0851064
Con	9	RHL_heterolat	0.0930233	0.0930233
Con	9	RHL_heterolat	0.0555556	0.0555556
Con	9	RHL_heterolat	0.151515	0.151515
Con	10	RHL_heterolat	0.192308	0.192308
Con	10	RHL_heterolat	0.346154	0.346154
Con	10	RHL_heterolat	0.964286	0.0357143
Con	10	RHL_heterolat	0.178571	0.178571
Con	10	RHL_heterolat	0.321429	0.321429
Con	10	RHL_heterolat	0.3	0.3
Con	10	RHL_heterolat	0.24	0.24
Con	10	RHL_heterolat	0.208333	0.208333
Con	10	RHL_heterolat	0.272727	0.272727
Con	10	RHL_heterolat	0.391304	0.391304
Con	10	RHL_heterolat	0.285714	0.285714
Con	10	RHL_heterolat	0.258065	0.258065
Con	10	RHL_heterolat	0.25	0.25
Con	10	RHL_heterolat	0.107143	0.107143
Con	10	RHL_heterolat	0.3	0.3
Con	10	RHL_heterolat	0.190476	0.190476
Con	10	RHL_heterolat	0.204545	0.204545
Con	10	RHL_heterolat	0.114286	0.114286
Con	10	RHL_heterolat	1	0
Con	10	RHL_heterolat	0.0740741	0.0740741
Con	10	RHL_heterolat	0.272727	0.272727
Con	10	RHL_heterolat	0.140351	0.140351
Con	10	RHL_heterolat	0.207792	0.207792
Con	10	RHL_heterolat	0.149254	0.149254
Con	10	RHL_heterolat	0.166667	0.166667
Con	10	RHL_heterolat	0.1875	0.1875
Con	10	RHL_heterolat	0.173913	0.173913
Con	10	RHL_heterolat	0.149254	0.149254
Con	10	RHL_heterolat	0.176471	0.176471
Con	10	RHL_heterolat	0.136986	0.136986
Con	12	RHL_heterolat	0.15	0.15
Con	12	RHL_heterolat	0.227273	0.227273
Con	12	RHL_heterolat	0.238095	0.238095
Con	12	RHL_heterolat	0.25	0.25
Con	12	RHL_heterolat	0.15	0.15
Con	12	RHL_heterolat	0.227273	0.227273
Con	12	RHL_heterolat	0.2	0.2
Con	12	RHL_heterolat	0.136364	0.136364
Con	12	RHL_heterolat	0.0952381	0.0952381
Con	12	RHL_heterolat	0.190476	0.190476
Con	12	RHL_heterolat	0.128205	0.128205
Con	12	RHL_heterolat	0.472973	0.472973
Con	12	RHL_heterolat	0.116279	0.116279
Con	12	RHL_heterolat	0.0816327	0.0816327
Con	12	RHL_heterolat	0.0925926	0.0925926
Con	12	RHL_heterolat	0.172414	0.172414
Con	12	RHL_heterolat	0.105263	0.105263
Con	12	RHL_heterolat	0.0757576	0.0757576
Con	13	RHL_heterolat	0.266667	0.266667
Con	13	RHL_heterolat	0.176471	0.176471
Con	13	RHL_heterolat	0.208333	0.208333
Con	13	RHL_heterolat	0.25	0.25
Con	13	RHL_heterolat	0.272727	0.272727
Con	13	RHL_heterolat	0.238095	0.238095
Con	13	RHL_heterolat	0.238095	0.238095
Con	13	RHL_heterolat	0.1	0.1
Con	13	RHL_heterolat	0.105263	0.105263
Con	13	RHL_heterolat	0.0877193	0.0877193
Con	13	RHL_heterolat	0.947368	0.0526316
Con	13	RHL_heterolat	0.0869565	0.0869565
Con	13	RHL_heterolat	0.0416667	0.0416667
Con	13	RHL_heterolat	0.0892857	0.0892857
Con	13	RHL_heterolat	0.102041	0.102041
Con	13	RHL_heterolat	0.0909091	0.0909091
Con	14	RHL_heterolat	0.136364	0.136364
Con	14	RHL_heterolat	0.217391	0.217391
Con	14	RHL_heterolat	0.238095	0.238095
Con	14	RHL_heterolat	0.318182	0.318182
Con	14	RHL_heterolat	0.238095	0.238095
Con	14	RHL_heterolat	0.181818	0.181818
Con	14	RHL_heterolat	0.136364	0.136364
Con	14	RHL_heterolat	0.217391	0.217391
Con	14	RHL_heterolat	0.173913	0.173913
Con	14	RHL_heterolat	0.03125	0.03125
Con	14	RHL_heterolat	0.0967742	0.0967742
Con	14	RHL_heterolat	0.157303	0.157303
Con	14	RHL_heterolat	0.242424	0.242424
Con	14	RHL_heterolat	0.0243902	0.0243902
Con	14	RHL_heterolat	0.132075	0.132075
Con	14	RHL_heterolat	0.1	0.1
Con	14	RHL_heterolat	0.147059	0.147059
Con	14	RHL_heterolat	0.195122	0.195122
Con	14	RHL_heterolat	0.0819672	0.0819672
Con	15	RHL_heterolat	0.26087	0.26087
Con	15	RHL_heterolat	0.166667	0.166667
Con	15	RHL_heterolat	0.2	0.2
Con	15	RHL_heterolat	0.142857	0.142857
Con	15	RHL_heterolat	0.153846	0.153846
Con	15	RHL_heterolat	0.125	0.125
Con	15	RHL_heterolat	0.439024	0.439024
Con	15	RHL_heterolat	0.169811	0.169811
Con	15	RHL_heterolat	0.189655	0.189655
Con	15	RHL_heterolat	0.241379	0.241379
Con	15	RHL_heterolat	0.28	0.28
Con	15	RHL_heterolat	0.240741	0.240741
Con	15	RHL_heterolat	0.189655	0.189655
Con	15	RHL_heterolat	0.363636	0.363636
Con	15	RHL_heterolat	0.230769	0.230769
Con	15	RHL_heterolat	0.351351	0.351351
Con	15	RHL_heterolat	0.135135	0.135135
Con	15	RHL_heterolat	0.217391	0.217391
Con	15	RHL_heterolat	0.15493	0.15493
Con	15	RHL_heterolat	0.321429	0.321429
Con	15	RHL_heterolat	0.16	0.16
Con	15	RHL_heterolat	0.27451	0.27451
Con	15	RHL_heterolat	0.114286	0.114286
Con	15	RHL_heterolat	0.212766	0.212766
Con	15	RHL_heterolat	0.208333	0.208333
Con	15	RHL_heterolat	0.111111	0.111111
Con	15	RHL_heterolat	0.410256	0.410256
Con	15	RHL_heterolat	0.0897436	0.0897436
Con	16	RHL_heterolat	0.111111	0.111111
Con	16	RHL_heterolat	0.176471	0.176471
Con	16	RHL_heterolat	0.1875	0.1875
Con	16	RHL_heterolat	0.333333	0.333333
Con	16	RHL_heterolat	0.1	0.1
Con	16	RHL_heterolat	0.2	0.2
Con	16	RHL_heterolat	0.205128	0.205128
Con	16	RHL_heterolat	0.186441	0.186441
Con	16	RHL_heterolat	0.175439	0.175439
Con	16	RHL_heterolat	0.192982	0.192982
Con	16	RHL_heterolat	0.139535	0.139535
Con	16	RHL_heterolat	0.255814	0.255814
Con	16	RHL_heterolat	0.219512	0.219512
Con	16	RHL_heterolat	0.175	0.175
Con	16	RHL_heterolat	0.188679	0.188679
Con	16	RHL_heterolat	0.179487	0.179487
Con	16	RHL_heterolat	0.285714	0.285714
Con	16	RHL_heterolat	0.139535	0.139535
Con	17	RHL_heterolat	0.176471	0.176471
Con	17	RHL_heterolat	0.181818	0.181818
Con	17	RHL_heterolat	0.2	0.2
Con	17	RHL_heterolat	0.217391	0.217391
Con	17	RHL_heterolat	0.217391	0.217391
Con	17	RHL_heterolat	0.227273	0.227273
Con	17	RHL_heterolat	0.142857	0.142857
Con	17	RHL_heterolat	0.125	0.125
Con	17	RHL_heterolat	0.183673	0.183673
Con	17	RHL_heterolat	0.217391	0.217391
Con	17	RHL_heterolat	0.0571429	0.0571429
Con	17	RHL_heterolat	0.946667	0.0533333
Con	17	RHL_heterolat	0.106667	0.106667
Con	17	RHL_heterolat	0.214286	0.214286
Con	17	RHL_heterolat	0.227273	0.227273
Con	17	RHL_heterolat	0.0645161	0.0645161
Con	17	RHL_heterolat	0.125	0.125
Con	17	RHL_heterolat	0.0666667	0.0666667
Con	17	RHL_heterolat	0.0232558	0.0232558
Con	17	RHL_heterolat	0.108108	0.108108
Con	17	RHL_heterolat	0.1875	0.1875
Con	17	RHL_heterolat	0.102564	0.102564
Con	18	RHL_heterolat	0.2	0.2
Con	18	RHL_heterolat	0.304348	0.304348
Con	18	RHL_heterolat	0.157895	0.157895
Con	18	RHL_heterolat	0.304348	0.304348
Con	18	RHL_heterolat	0.263158	0.263158
Con	18	RHL_heterolat	0.15	0.15
Con	18	RHL_heterolat	0.136364	0.136364
Con	18	RHL_heterolat	0.176471	0.176471
Con	18	RHL_heterolat	0.255814	0.255814
Con	18	RHL_heterolat	0.208333	0.208333
Con	18	RHL_heterolat	0.236364	0.236364
Con	18	RHL_heterolat	0.4	0.4
Con	18	RHL_heterolat	0.12963	0.12963
Con	18	RHL_heterolat	0.243902	0.243902
Con	18	RHL_heterolat	0.244898	0.244898
Con	18	RHL_heterolat	0.244444	0.244444
Con	18	RHL_heterolat	0.195122	0.195122
Con	18	RHL_heterolat	0.272727	0.272727
Con	18	RHL_heterolat	0.1875	0.1875
Con	18	RHL_heterolat	0.189189	0.189189
Con	18	RHL_heterolat	0.190476	0.190476
