# Supplementary material for: Long ascending propriospinal neurons provide flexible, context-specific control of interlimb coordination
Source: eLife. 2020 Sep 9;9:e53565. doi: 10.7554/eLife.53565 (PMC7527236; doi:10.7554/eLife.53565)
Supplement: Figure 5—source data 3. [file elife-53565-fig5-data3.xlsx]

## Sheet: L-R_forelimbs
Animal_ID	Time_ID	Step_surface	L-R_forelimb_rawPhase	L-R_forelimb_transPhase
17	Baseline	smooth/plexi	0.586207	0.586207
17	Baseline	smooth/plexi	0.470588	0.529412
17	Baseline	smooth/plexi	0.424242	0.575758
17	Baseline	smooth/plexi	0.448276	0.551724
17	Baseline	smooth/plexi	0.517241	0.517241
17	Baseline	smooth/plexi	0.516129	0.516129
17	Baseline	smooth/plexi	0.5	0.5
17	Baseline	smooth/plexi	0.5	0.5
17	Baseline	smooth/plexi	0.5	0.5
17	Baseline	smooth/plexi	0.5	0.5
17	Baseline	smooth/plexi	0.454545	0.545455
17	Baseline	smooth/plexi	0.5	0.5
18	Baseline	smooth/plexi	0.5625	0.5625
18	Baseline	smooth/plexi	0.484848	0.515152
18	Baseline	smooth/plexi	0.5	0.5
18	Baseline	smooth/plexi	0.566667	0.566667
18	Baseline	smooth/plexi	0.526316	0.526316
18	Baseline	smooth/plexi	0.578947	0.578947
18	Baseline	smooth/plexi	0.515152	0.515152
18	Baseline	smooth/plexi	0.484848	0.515152
18	Baseline	smooth/plexi	0.485714	0.514286
18	Baseline	smooth/plexi	0.5	0.5
19	Baseline	smooth/plexi	0.466667	0.533333
19	Baseline	smooth/plexi	0.515152	0.515152
19	Baseline	smooth/plexi	0.59375	0.59375
19	Baseline	smooth/plexi	0.529412	0.529412
19	Baseline	smooth/plexi	0.516129	0.516129
19	Baseline	smooth/plexi	0.533333	0.533333
19	Baseline	smooth/plexi	0.482759	0.517241
19	Baseline	smooth/plexi	0.5	0.5
19	Baseline	smooth/plexi	0.5	0.5
19	Baseline	smooth/plexi	0.571429	0.571429
19	Baseline	smooth/plexi	0.538462	0.538462
19	Baseline	smooth/plexi	0.571429	0.571429
20	Baseline	smooth/plexi	0.432432	0.567568
20	Baseline	smooth/plexi	0.5	0.5
20	Baseline	smooth/plexi	0.432432	0.567568
20	Baseline	smooth/plexi	0.526316	0.526316
20	Baseline	smooth/plexi	0.447368	0.552632
20	Baseline	smooth/plexi	0.46875	0.53125
20	Baseline	smooth/plexi	0.592593	0.592593
20	Baseline	smooth/plexi	0.487179	0.512821
21	Baseline	smooth/plexi	0.452381	0.547619
21	Baseline	smooth/plexi	0.470588	0.529412
21	Baseline	smooth/plexi	0.517241	0.517241
21	Baseline	smooth/plexi	0.515152	0.515152
21	Baseline	smooth/plexi	0.448276	0.551724
21	Baseline	smooth/plexi	0.580645	0.580645
21	Baseline	smooth/plexi	0.551724	0.551724
21	Baseline	smooth/plexi	0.514286	0.514286
21	Baseline	smooth/plexi	0.580645	0.580645
21	Baseline	smooth/plexi	0.558824	0.558824
22	Baseline	smooth/plexi	0.515152	0.515152
22	Baseline	smooth/plexi	0.533333	0.533333
22	Baseline	smooth/plexi	0.454545	0.545455
22	Baseline	smooth/plexi	0.5625	0.5625
22	Baseline	smooth/plexi	0.607143	0.607143
22	Baseline	smooth/plexi	0.545455	0.545455
22	Baseline	smooth/plexi	0.516129	0.516129
22	Baseline	smooth/plexi	0.529412	0.529412
22	Baseline	smooth/plexi	0.434783	0.565217
22	Baseline	smooth/plexi	0.5	0.5
22	Baseline	smooth/plexi	0.588235	0.588235
22	Baseline	smooth/plexi	0.548387	0.548387
23	Baseline	smooth/plexi	0.421053	0.578947
23	Baseline	smooth/plexi	0.558824	0.558824
23	Baseline	smooth/plexi	0.617647	0.617647
23	Baseline	smooth/plexi	0.485714	0.514286
23	Baseline	smooth/plexi	0.419355	0.580645
23	Baseline	smooth/plexi	0.542857	0.542857
23	Baseline	smooth/plexi	0.551724	0.551724
23	Baseline	smooth/plexi	0.516129	0.516129
23	Baseline	smooth/plexi	0.513514	0.513514
23	Baseline	smooth/plexi	0.567568	0.567568
24	Baseline	smooth/plexi	0.514286	0.514286
24	Baseline	smooth/plexi	0.53125	0.53125
24	Baseline	smooth/plexi	0.567568	0.567568
24	Baseline	smooth/plexi	0.470588	0.529412
24	Baseline	smooth/plexi	0.411765	0.588235
24	Baseline	smooth/plexi	0.548387	0.548387
17	Baseline	coated/Syl	0.5	0.5
17	Baseline	coated/Syl	0.484848	0.515152
17	Baseline	coated/Syl	0.448276	0.551724
17	Baseline	coated/Syl	0.517241	0.517241
17	Baseline	coated/Syl	0.411765	0.588235
17	Baseline	coated/Syl	0.428571	0.571429
17	Baseline	coated/Syl	0.483871	0.516129
17	Baseline	coated/Syl	0.466667	0.533333
17	Baseline	coated/Syl	0.529412	0.529412
17	Baseline	coated/Syl	0.571429	0.571429
17	Baseline	coated/Syl	0.5	0.5
17	Baseline	coated/Syl	0.538462	0.538462
18	Baseline	coated/Syl	0.518519	0.518519
18	Baseline	coated/Syl	0.538462	0.538462
18	Baseline	coated/Syl	0.457143	0.542857
18	Baseline	coated/Syl	0.484848	0.515152
18	Baseline	coated/Syl	0.5	0.5
18	Baseline	coated/Syl	0.5	0.5
18	Baseline	coated/Syl	0.533333	0.533333
18	Baseline	coated/Syl	0.5	0.5
19	Baseline	coated/Syl	0.46875	0.53125
19	Baseline	coated/Syl	0.464286	0.535714
19	Baseline	coated/Syl	0.615385	0.615385
19	Baseline	coated/Syl	0.56	0.56
19	Baseline	coated/Syl	0.538462	0.538462
19	Baseline	coated/Syl	0.533333	0.533333
19	Baseline	coated/Syl	0.517241	0.517241
19	Baseline	coated/Syl	0.518519	0.518519
19	Baseline	coated/Syl	0.52	0.52
20	Baseline	coated/Syl	0.529412	0.529412
20	Baseline	coated/Syl	0.592593	0.592593
20	Baseline	coated/Syl	0.538462	0.538462
20	Baseline	coated/Syl	0.481481	0.518519
20	Baseline	coated/Syl	0.416667	0.583333
20	Baseline	coated/Syl	0.407407	0.592593
20	Baseline	coated/Syl	0.533333	0.533333
20	Baseline	coated/Syl	0.551724	0.551724
20	Baseline	coated/Syl	0.5	0.5
20	Baseline	coated/Syl	0.515152	0.515152
21	Baseline	coated/Syl	0.612903	0.612903
21	Baseline	coated/Syl	0.5	0.5
21	Baseline	coated/Syl	0.533333	0.533333
21	Baseline	coated/Syl	0.466667	0.533333
21	Baseline	coated/Syl	0.576923	0.576923
21	Baseline	coated/Syl	0.5	0.5
21	Baseline	coated/Syl	0.636364	0.636364
21	Baseline	coated/Syl	0.48	0.52
21	Baseline	coated/Syl	0.592593	0.592593
21	Baseline	coated/Syl	0.5	0.5
22	Baseline	coated/Syl	0.555556	0.555556
22	Baseline	coated/Syl	0.5	0.5
22	Baseline	coated/Syl	0.606061	0.606061
22	Baseline	coated/Syl	0.52	0.52
22	Baseline	coated/Syl	0.48	0.52
22	Baseline	coated/Syl	0.5	0.5
22	Baseline	coated/Syl	0.5	0.5
22	Baseline	coated/Syl	0.538462	0.538462
22	Baseline	coated/Syl	0.64	0.64
22	Baseline	coated/Syl	0.518519	0.518519
23	Baseline	coated/Syl	0.5	0.5
23	Baseline	coated/Syl	0.52	0.52
23	Baseline	coated/Syl	0.515152	0.515152
23	Baseline	coated/Syl	0.441176	0.558824
23	Baseline	coated/Syl	0.444444	0.555556
23	Baseline	coated/Syl	0.566667	0.566667
23	Baseline	coated/Syl	0.56	0.56
23	Baseline	coated/Syl	0.576923	0.576923
23	Baseline	coated/Syl	0.56	0.56
24	Baseline	coated/Syl	0.384615	0.615385
24	Baseline	coated/Syl	0.464286	0.535714
24	Baseline	coated/Syl	0.516129	0.516129
24	Baseline	coated/Syl	0.535714	0.535714
24	Baseline	coated/Syl	0.517241	0.517241
24	Baseline	coated/Syl	0.555556	0.555556
24	Baseline	coated/Syl	0.428571	0.571429
24	Baseline	coated/Syl	0.423077	0.576923
24	Baseline	coated/Syl	0.481481	0.518519
24	Baseline	coated/Syl	0.541667	0.541667
17	PreDox1	smooth/plexi	0.486486	0.513514
17	PreDox1	smooth/plexi	0.5	0.5
17	PreDox1	smooth/plexi	0.470588	0.529412
17	PreDox1	smooth/plexi	0.5	0.5
17	PreDox1	smooth/plexi	0.5	0.5
17	PreDox1	smooth/plexi	0.5	0.5
17	PreDox1	smooth/plexi	0.404762	0.595238
17	PreDox1	smooth/plexi	0.481481	0.518519
17	PreDox1	smooth/plexi	0.533333	0.533333
17	PreDox1	smooth/plexi	0.481481	0.518519
17	PreDox1	smooth/plexi	0.464286	0.535714
17	PreDox1	smooth/plexi	0.434783	0.565217
17	PreDox1	smooth/plexi	0.419355	0.580645
18	PreDox1	smooth/plexi	0.608696	0.608696
18	PreDox1	smooth/plexi	0.5	0.5
18	PreDox1	smooth/plexi	0.5	0.5
18	PreDox1	smooth/plexi	0.666667	0.666667
18	PreDox1	smooth/plexi	0.483871	0.516129
18	PreDox1	smooth/plexi	0.378788	0.621212
18	PreDox1	smooth/plexi	0.5	0.5
18	PreDox1	smooth/plexi	0.5	0.5
18	PreDox1	smooth/plexi	0.392157	0.607843
18	PreDox1	smooth/plexi	0.548387	0.548387
18	PreDox1	smooth/plexi	0.416667	0.583333
18	PreDox1	smooth/plexi	0.516129	0.516129
19	PreDox1	smooth/plexi	0.516129	0.516129
19	PreDox1	smooth/plexi	0.451613	0.548387
19	PreDox1	smooth/plexi	0.538462	0.538462
19	PreDox1	smooth/plexi	0.551724	0.551724
19	PreDox1	smooth/plexi	0.5	0.5
19	PreDox1	smooth/plexi	0.461538	0.538462
19	PreDox1	smooth/plexi	0.464286	0.535714
19	PreDox1	smooth/plexi	0.553191	0.553191
19	PreDox1	smooth/plexi	0.47619	0.52381
19	PreDox1	smooth/plexi	0.583333	0.583333
20	PreDox1	smooth/plexi	0.354839	0.645161
20	PreDox1	smooth/plexi	0.457143	0.542857
20	PreDox1	smooth/plexi	0.516129	0.516129
20	PreDox1	smooth/plexi	0.428571	0.571429
20	PreDox1	smooth/plexi	0.473684	0.526316
20	PreDox1	smooth/plexi	0.482759	0.517241
20	PreDox1	smooth/plexi	0.464286	0.535714
20	PreDox1	smooth/plexi	0.413793	0.586207
20	PreDox1	smooth/plexi	0.48	0.52
20	PreDox1	smooth/plexi	0.4	0.6
20	PreDox1	smooth/plexi	0.439024	0.560976
20	PreDox1	smooth/plexi	0.40625	0.59375
21	PreDox1	smooth/plexi	0.444444	0.555556
21	PreDox1	smooth/plexi	0.5	0.5
21	PreDox1	smooth/plexi	0.451613	0.548387
21	PreDox1	smooth/plexi	0.517241	0.517241
21	PreDox1	smooth/plexi	0.555556	0.555556
21	PreDox1	smooth/plexi	0.482759	0.517241
21	PreDox1	smooth/plexi	0.452381	0.547619
21	PreDox1	smooth/plexi	0.454545	0.545455
21	PreDox1	smooth/plexi	0.5625	0.5625
21	PreDox1	smooth/plexi	0.517241	0.517241
22	PreDox1	smooth/plexi	0.586207	0.586207
22	PreDox1	smooth/plexi	0.551724	0.551724
22	PreDox1	smooth/plexi	0.454545	0.545455
22	PreDox1	smooth/plexi	0.555556	0.555556
22	PreDox1	smooth/plexi	0.551724	0.551724
22	PreDox1	smooth/plexi	0.538462	0.538462
22	PreDox1	smooth/plexi	0.527778	0.527778
22	PreDox1	smooth/plexi	0.638889	0.638889
22	PreDox1	smooth/plexi	0.529412	0.529412
22	PreDox1	smooth/plexi	0.516129	0.516129
22	PreDox1	smooth/plexi	0.526316	0.526316
23	PreDox1	smooth/plexi	0.459459	0.540541
23	PreDox1	smooth/plexi	0.578947	0.578947
23	PreDox1	smooth/plexi	0.518519	0.518519
23	PreDox1	smooth/plexi	0.5	0.5
23	PreDox1	smooth/plexi	0.485714	0.514286
23	PreDox1	smooth/plexi	0.461538	0.538462
23	PreDox1	smooth/plexi	0.548387	0.548387
23	PreDox1	smooth/plexi	0.586207	0.586207
23	PreDox1	smooth/plexi	0.433333	0.566667
23	PreDox1	smooth/plexi	0.5	0.5
23	PreDox1	smooth/plexi	0.481481	0.518519
24	PreDox1	smooth/plexi	0.481481	0.518519
24	PreDox1	smooth/plexi	0.482759	0.517241
24	PreDox1	smooth/plexi	0.542373	0.542373
24	PreDox1	smooth/plexi	0.428571	0.571429
24	PreDox1	smooth/plexi	0.463415	0.536585
24	PreDox1	smooth/plexi	0.512821	0.512821
24	PreDox1	smooth/plexi	0.5	0.5
24	PreDox1	smooth/plexi	0.428571	0.571429
24	PreDox1	smooth/plexi	0.621622	0.621622
24	PreDox1	smooth/plexi	0.461538	0.538462
17	PreDox1	coated/Syl	0.4	0.6
17	PreDox1	coated/Syl	0.461538	0.538462
17	PreDox1	coated/Syl	0.428571	0.571429
17	PreDox1	coated/Syl	0.428571	0.571429
17	PreDox1	coated/Syl	0.458333	0.541667
17	PreDox1	coated/Syl	0.52	0.52
17	PreDox1	coated/Syl	0.48	0.52
17	PreDox1	coated/Syl	0.44	0.56
17	PreDox1	coated/Syl	0.48	0.52
17	PreDox1	coated/Syl	0.454545	0.545455
18	PreDox1	coated/Syl	0.535714	0.535714
18	PreDox1	coated/Syl	0.5	0.5
18	PreDox1	coated/Syl	0.5	0.5
18	PreDox1	coated/Syl	0.481481	0.518519
18	PreDox1	coated/Syl	0.56	0.56
18	PreDox1	coated/Syl	0.518519	0.518519
18	PreDox1	coated/Syl	0.5	0.5
18	PreDox1	coated/Syl	0.586207	0.586207
18	PreDox1	coated/Syl	0.5	0.5
18	PreDox1	coated/Syl	0.416667	0.583333
18	PreDox1	coated/Syl	0.5	0.5
19	PreDox1	coated/Syl	0.515152	0.515152
19	PreDox1	coated/Syl	0.5	0.5
19	PreDox1	coated/Syl	0.5	0.5
19	PreDox1	coated/Syl	0.633333	0.633333
19	PreDox1	coated/Syl	0.5	0.5
19	PreDox1	coated/Syl	0.541667	0.541667
19	PreDox1	coated/Syl	0.653846	0.653846
19	PreDox1	coated/Syl	0.571429	0.571429
19	PreDox1	coated/Syl	0.517241	0.517241
20	PreDox1	coated/Syl	0.423077	0.576923
20	PreDox1	coated/Syl	0.423077	0.576923
20	PreDox1	coated/Syl	0.423077	0.576923
20	PreDox1	coated/Syl	0.481481	0.518519
20	PreDox1	coated/Syl	0.461538	0.538462
20	PreDox1	coated/Syl	0.52	0.52
20	PreDox1	coated/Syl	0.428571	0.571429
20	PreDox1	coated/Syl	0.483871	0.516129
20	PreDox1	coated/Syl	0.461538	0.538462
20	PreDox1	coated/Syl	0.466667	0.533333
20	PreDox1	coated/Syl	0.464286	0.535714
20	PreDox1	coated/Syl	0.590909	0.590909
20	PreDox1	coated/Syl	0.571429	0.571429
21	PreDox1	coated/Syl	0.482759	0.517241
21	PreDox1	coated/Syl	0.466667	0.533333
21	PreDox1	coated/Syl	0.428571	0.571429
21	PreDox1	coated/Syl	0.515152	0.515152
21	PreDox1	coated/Syl	0.6	0.6
21	PreDox1	coated/Syl	0.428571	0.571429
21	PreDox1	coated/Syl	0.5	0.5
21	PreDox1	coated/Syl	0.416667	0.583333
21	PreDox1	coated/Syl	0.533333	0.533333
21	PreDox1	coated/Syl	0.5	0.5
21	PreDox1	coated/Syl	0.538462	0.538462
21	PreDox1	coated/Syl	0.46875	0.53125
22	PreDox1	coated/Syl	0.6	0.6
22	PreDox1	coated/Syl	0.535714	0.535714
22	PreDox1	coated/Syl	0.576923	0.576923
22	PreDox1	coated/Syl	0.62963	0.62963
22	PreDox1	coated/Syl	0.592593	0.592593
22	PreDox1	coated/Syl	0.592593	0.592593
22	PreDox1	coated/Syl	0.454545	0.545455
22	PreDox1	coated/Syl	0.516129	0.516129
22	PreDox1	coated/Syl	0.548387	0.548387
22	PreDox1	coated/Syl	0.5	0.5
22	PreDox1	coated/Syl	0.583333	0.583333
22	PreDox1	coated/Syl	0.521739	0.521739
23	PreDox1	coated/Syl	0.565217	0.565217
23	PreDox1	coated/Syl	0.384615	0.615385
23	PreDox1	coated/Syl	0.5	0.5
23	PreDox1	coated/Syl	0.409091	0.590909
23	PreDox1	coated/Syl	0.5	0.5
23	PreDox1	coated/Syl	0.481481	0.518519
23	PreDox1	coated/Syl	0.47619	0.52381
23	PreDox1	coated/Syl	0.52	0.52
23	PreDox1	coated/Syl	0.458333	0.541667
23	PreDox1	coated/Syl	0.444444	0.555556
24	PreDox1	coated/Syl	0.538462	0.538462
24	PreDox1	coated/Syl	0.444444	0.555556
24	PreDox1	coated/Syl	0.521739	0.521739
24	PreDox1	coated/Syl	0.416667	0.583333
24	PreDox1	coated/Syl	0.5	0.5
24	PreDox1	coated/Syl	0.52	0.52
24	PreDox1	coated/Syl	0.6	0.6
24	PreDox1	coated/Syl	0.483871	0.516129
24	PreDox1	coated/Syl	0.466667	0.533333
24	PreDox1	coated/Syl	0.461538	0.538462
17	Dox1Day5	smooth/plexi	0.482759	0.517241
17	Dox1Day5	smooth/plexi	0.535714	0.535714
17	Dox1Day5	smooth/plexi	0.586207	0.586207
17	Dox1Day5	smooth/plexi	0.517241	0.517241
17	Dox1Day5	smooth/plexi	0.481481	0.518519
17	Dox1Day5	smooth/plexi	0.5	0.5
17	Dox1Day5	smooth/plexi	0.454545	0.545455
17	Dox1Day5	smooth/plexi	0.482759	0.517241
17	Dox1Day5	smooth/plexi	0.558824	0.558824
17	Dox1Day5	smooth/plexi	0.5	0.5
17	Dox1Day5	smooth/plexi	0.551724	0.551724
17	Dox1Day5	smooth/plexi	0.5	0.5
18	Dox1Day5	smooth/plexi	0.535714	0.535714
18	Dox1Day5	smooth/plexi	0.56	0.56
18	Dox1Day5	smooth/plexi	0.565217	0.565217
18	Dox1Day5	smooth/plexi	0.521739	0.521739
18	Dox1Day5	smooth/plexi	0.541667	0.541667
18	Dox1Day5	smooth/plexi	0.545455	0.545455
18	Dox1Day5	smooth/plexi	0.521739	0.521739
18	Dox1Day5	smooth/plexi	0.53125	0.53125
18	Dox1Day5	smooth/plexi	0.5	0.5
18	Dox1Day5	smooth/plexi	0.518519	0.518519
19	Dox1Day5	smooth/plexi	0.52	0.52
19	Dox1Day5	smooth/plexi	0.5	0.5
19	Dox1Day5	smooth/plexi	0.535714	0.535714
19	Dox1Day5	smooth/plexi	0.5	0.5
19	Dox1Day5	smooth/plexi	0.535714	0.535714
19	Dox1Day5	smooth/plexi	0.576923	0.576923
19	Dox1Day5	smooth/plexi	0.538462	0.538462
19	Dox1Day5	smooth/plexi	0.535714	0.535714
19	Dox1Day5	smooth/plexi	0.517241	0.517241
19	Dox1Day5	smooth/plexi	0.571429	0.571429
20	Dox1Day5	smooth/plexi	0.538462	0.538462
20	Dox1Day5	smooth/plexi	0.444444	0.555556
20	Dox1Day5	smooth/plexi	0.36	0.64
20	Dox1Day5	smooth/plexi	0.416667	0.583333
20	Dox1Day5	smooth/plexi	0.444444	0.555556
20	Dox1Day5	smooth/plexi	0.483871	0.516129
20	Dox1Day5	smooth/plexi	0.478261	0.521739
20	Dox1Day5	smooth/plexi	0.518519	0.518519
20	Dox1Day5	smooth/plexi	0.444444	0.555556
20	Dox1Day5	smooth/plexi	0.5	0.5
21	Dox1Day5	smooth/plexi	0.483871	0.516129
21	Dox1Day5	smooth/plexi	0.4375	0.5625
21	Dox1Day5	smooth/plexi	0.444444	0.555556
21	Dox1Day5	smooth/plexi	0.518519	0.518519
21	Dox1Day5	smooth/plexi	0.5	0.5
21	Dox1Day5	smooth/plexi	0.5	0.5
21	Dox1Day5	smooth/plexi	0.44	0.56
21	Dox1Day5	smooth/plexi	0.413793	0.586207
21	Dox1Day5	smooth/plexi	0.483871	0.516129
21	Dox1Day5	smooth/plexi	0.515152	0.515152
22	Dox1Day5	smooth/plexi	0.52	0.52
22	Dox1Day5	smooth/plexi	0.576923	0.576923
22	Dox1Day5	smooth/plexi	0.461538	0.538462
22	Dox1Day5	smooth/plexi	0.521739	0.521739
22	Dox1Day5	smooth/plexi	0.535714	0.535714
22	Dox1Day5	smooth/plexi	0.538462	0.538462
22	Dox1Day5	smooth/plexi	0.5	0.5
22	Dox1Day5	smooth/plexi	0.52	0.52
22	Dox1Day5	smooth/plexi	0.551724	0.551724
22	Dox1Day5	smooth/plexi	0.5	0.5
23	Dox1Day5	smooth/plexi	0.5	0.5
23	Dox1Day5	smooth/plexi	0.454545	0.545455
23	Dox1Day5	smooth/plexi	0.458333	0.541667
23	Dox1Day5	smooth/plexi	0.5	0.5
23	Dox1Day5	smooth/plexi	0.458333	0.541667
23	Dox1Day5	smooth/plexi	0.454545	0.545455
23	Dox1Day5	smooth/plexi	0.384615	0.615385
23	Dox1Day5	smooth/plexi	0.521739	0.521739
24	Dox1Day5	smooth/plexi	0.529412	0.529412
24	Dox1Day5	smooth/plexi	0.466667	0.533333
24	Dox1Day5	smooth/plexi	0.5	0.5
24	Dox1Day5	smooth/plexi	0.473684	0.526316
24	Dox1Day5	smooth/plexi	0.5	0.5
24	Dox1Day5	smooth/plexi	0.5	0.5
24	Dox1Day5	smooth/plexi	0.48	0.52
24	Dox1Day5	smooth/plexi	0.5	0.5
24	Dox1Day5	smooth/plexi	0.5	0.5
24	Dox1Day5	smooth/plexi	0.461538	0.538462
24	Dox1Day5	smooth/plexi	0.5	0.5
24	Dox1Day5	smooth/plexi	0.548387	0.548387
17	Dox1Day5	coated/Syl	0.48	0.52
17	Dox1Day5	coated/Syl	0.478261	0.521739
17	Dox1Day5	coated/Syl	0.5	0.5
17	Dox1Day5	coated/Syl	0.5	0.5
17	Dox1Day5	coated/Syl	0.5	0.5
17	Dox1Day5	coated/Syl	0.448276	0.551724
17	Dox1Day5	coated/Syl	0.5	0.5
17	Dox1Day5	coated/Syl	0.517241	0.517241
17	Dox1Day5	coated/Syl	0.464286	0.535714
17	Dox1Day5	coated/Syl	0.5	0.5
17	Dox1Day5	coated/Syl	0.451613	0.548387
17	Dox1Day5	coated/Syl	0.444444	0.555556
18	Dox1Day5	coated/Syl	0.565217	0.565217
18	Dox1Day5	coated/Syl	0.5	0.5
18	Dox1Day5	coated/Syl	0.590909	0.590909
18	Dox1Day5	coated/Syl	0.583333	0.583333
18	Dox1Day5	coated/Syl	0.481481	0.518519
18	Dox1Day5	coated/Syl	0.521739	0.521739
18	Dox1Day5	coated/Syl	0.545455	0.545455
18	Dox1Day5	coated/Syl	0.47619	0.52381
18	Dox1Day5	coated/Syl	0.75	0.75
18	Dox1Day5	coated/Syl	0.631579	0.631579
18	Dox1Day5	coated/Syl	0.571429	0.571429
18	Dox1Day5	coated/Syl	0.545455	0.545455
19	Dox1Day5	coated/Syl	0.52	0.52
19	Dox1Day5	coated/Syl	0.517241	0.517241
19	Dox1Day5	coated/Syl	0.56	0.56
19	Dox1Day5	coated/Syl	0.461538	0.538462
19	Dox1Day5	coated/Syl	0.518519	0.518519
19	Dox1Day5	coated/Syl	0.641026	0.641026
19	Dox1Day5	coated/Syl	0.459459	0.540541
19	Dox1Day5	coated/Syl	0.586207	0.586207
19	Dox1Day5	coated/Syl	0.53125	0.53125
19	Dox1Day5	coated/Syl	0.470588	0.529412
19	Dox1Day5	coated/Syl	0.566667	0.566667
20	Dox1Day5	coated/Syl	0.789474	0.789474
20	Dox1Day5	coated/Syl	0.210526	0.789474
20	Dox1Day5	coated/Syl	0.235294	0.764706
20	Dox1Day5	coated/Syl	0.521739	0.521739
20	Dox1Day5	coated/Syl	0.5	0.5
20	Dox1Day5	coated/Syl	0.55814	0.55814
20	Dox1Day5	coated/Syl	0.448276	0.551724
20	Dox1Day5	coated/Syl	0.521739	0.521739
20	Dox1Day5	coated/Syl	0.666667	0.666667
20	Dox1Day5	coated/Syl	0.722222	0.722222
21	Dox1Day5	coated/Syl	0.5	0.5
21	Dox1Day5	coated/Syl	0.410256	0.589744
21	Dox1Day5	coated/Syl	0.425	0.575
21	Dox1Day5	coated/Syl	0.466667	0.533333
21	Dox1Day5	coated/Syl	0.529412	0.529412
21	Dox1Day5	coated/Syl	0.483871	0.516129
21	Dox1Day5	coated/Syl	0.52381	0.52381
21	Dox1Day5	coated/Syl	0.5	0.5
21	Dox1Day5	coated/Syl	0.521739	0.521739
21	Dox1Day5	coated/Syl	0.47619	0.52381
21	Dox1Day5	coated/Syl	0.458333	0.541667
21	Dox1Day5	coated/Syl	0.48	0.52
22	Dox1Day5	coated/Syl	0.52381	0.52381
22	Dox1Day5	coated/Syl	0.45	0.55
22	Dox1Day5	coated/Syl	0.421053	0.578947
22	Dox1Day5	coated/Syl	0.411765	0.588235
22	Dox1Day5	coated/Syl	0.85	0.85
22	Dox1Day5	coated/Syl	0.615385	0.615385
22	Dox1Day5	coated/Syl	0.631579	0.631579
22	Dox1Day5	coated/Syl	0.518519	0.518519
22	Dox1Day5	coated/Syl	0.333333	0.666667
22	Dox1Day5	coated/Syl	0.619048	0.619048
22	Dox1Day5	coated/Syl	0.636364	0.636364
23	Dox1Day5	coated/Syl	0.277778	0.722222
23	Dox1Day5	coated/Syl	0.35	0.65
23	Dox1Day5	coated/Syl	0.555556	0.555556
23	Dox1Day5	coated/Syl	0.666667	0.666667
23	Dox1Day5	coated/Syl	0.681818	0.681818
23	Dox1Day5	coated/Syl	0.352941	0.647059
23	Dox1Day5	coated/Syl	0.428571	0.571429
23	Dox1Day5	coated/Syl	0.45	0.55
23	Dox1Day5	coated/Syl	0.526316	0.526316
23	Dox1Day5	coated/Syl	0.705882	0.705882
24	Dox1Day5	coated/Syl	0.46875	0.53125
24	Dox1Day5	coated/Syl	0.5	0.5
24	Dox1Day5	coated/Syl	0.541667	0.541667
24	Dox1Day5	coated/Syl	0.52	0.52
24	Dox1Day5	coated/Syl	0.52	0.52
24	Dox1Day5	coated/Syl	0.458333	0.541667
24	Dox1Day5	coated/Syl	0.541667	0.541667
24	Dox1Day5	coated/Syl	0.458333	0.541667
24	Dox1Day5	coated/Syl	0.583333	0.583333
24	Dox1Day5	coated/Syl	0.481481	0.518519
24	Dox1Day5	coated/Syl	0.458333	0.541667
17	Dox1Day8	smooth/plexi	0.580645	0.580645
17	Dox1Day8	smooth/plexi	0.484848	0.515152
17	Dox1Day8	smooth/plexi	0.53125	0.53125
17	Dox1Day8	smooth/plexi	0.535714	0.535714
17	Dox1Day8	smooth/plexi	0.52	0.52
17	Dox1Day8	smooth/plexi	0.482759	0.517241
17	Dox1Day8	smooth/plexi	0.481481	0.518519
17	Dox1Day8	smooth/plexi	0.464286	0.535714
17	Dox1Day8	smooth/plexi	0.5	0.5
17	Dox1Day8	smooth/plexi	0.482759	0.517241
17	Dox1Day8	smooth/plexi	0.5	0.5
17	Dox1Day8	smooth/plexi	0.37931	0.62069
18	Dox1Day8	smooth/plexi	0.5	0.5
18	Dox1Day8	smooth/plexi	0.5	0.5
18	Dox1Day8	smooth/plexi	0.482759	0.517241
18	Dox1Day8	smooth/plexi	0.541667	0.541667
18	Dox1Day8	smooth/plexi	0.5	0.5
18	Dox1Day8	smooth/plexi	0.538462	0.538462
18	Dox1Day8	smooth/plexi	0.5	0.5
18	Dox1Day8	smooth/plexi	0.545455	0.545455
18	Dox1Day8	smooth/plexi	0.52381	0.52381
19	Dox1Day8	smooth/plexi	0.545455	0.545455
19	Dox1Day8	smooth/plexi	0.592593	0.592593
19	Dox1Day8	smooth/plexi	0.625	0.625
19	Dox1Day8	smooth/plexi	0.615385	0.615385
19	Dox1Day8	smooth/plexi	0.483871	0.516129
19	Dox1Day8	smooth/plexi	0.625	0.625
19	Dox1Day8	smooth/plexi	0.583333	0.583333
19	Dox1Day8	smooth/plexi	0.625	0.625
19	Dox1Day8	smooth/plexi	0.566667	0.566667
19	Dox1Day8	smooth/plexi	0.529412	0.529412
19	Dox1Day8	smooth/plexi	0.5	0.5
20	Dox1Day8	smooth/plexi	0.413793	0.586207
20	Dox1Day8	smooth/plexi	0.470588	0.529412
20	Dox1Day8	smooth/plexi	0.535714	0.535714
20	Dox1Day8	smooth/plexi	0.470588	0.529412
20	Dox1Day8	smooth/plexi	0.552632	0.552632
20	Dox1Day8	smooth/plexi	0.571429	0.571429
20	Dox1Day8	smooth/plexi	0.363636	0.636364
20	Dox1Day8	smooth/plexi	0.5	0.5
20	Dox1Day8	smooth/plexi	0.478261	0.521739
20	Dox1Day8	smooth/plexi	0.5	0.5
20	Dox1Day8	smooth/plexi	0.447368	0.552632
21	Dox1Day8	smooth/plexi	0.483871	0.516129
21	Dox1Day8	smooth/plexi	0.482759	0.517241
21	Dox1Day8	smooth/plexi	0.423077	0.576923
21	Dox1Day8	smooth/plexi	0.5	0.5
21	Dox1Day8	smooth/plexi	0.40625	0.59375
21	Dox1Day8	smooth/plexi	0.482759	0.517241
21	Dox1Day8	smooth/plexi	0.481481	0.518519
21	Dox1Day8	smooth/plexi	0.516129	0.516129
21	Dox1Day8	smooth/plexi	0.52	0.52
22	Dox1Day8	smooth/plexi	0.48	0.52
22	Dox1Day8	smooth/plexi	0.52	0.52
22	Dox1Day8	smooth/plexi	0.521739	0.521739
22	Dox1Day8	smooth/plexi	0.517241	0.517241
22	Dox1Day8	smooth/plexi	0.407407	0.592593
22	Dox1Day8	smooth/plexi	0.533333	0.533333
22	Dox1Day8	smooth/plexi	0.48	0.52
22	Dox1Day8	smooth/plexi	0.62069	0.62069
22	Dox1Day8	smooth/plexi	0.7	0.7
22	Dox1Day8	smooth/plexi	0.576923	0.576923
23	Dox1Day8	smooth/plexi	0.5	0.5
23	Dox1Day8	smooth/plexi	0.458333	0.541667
23	Dox1Day8	smooth/plexi	0.454545	0.545455
23	Dox1Day8	smooth/plexi	0.538462	0.538462
23	Dox1Day8	smooth/plexi	0.583333	0.583333
23	Dox1Day8	smooth/plexi	0.382353	0.617647
23	Dox1Day8	smooth/plexi	0.5	0.5
23	Dox1Day8	smooth/plexi	0.52	0.52
23	Dox1Day8	smooth/plexi	0.464286	0.535714
23	Dox1Day8	smooth/plexi	0.454545	0.545455
24	Dox1Day8	smooth/plexi	0.4375	0.5625
24	Dox1Day8	smooth/plexi	0.482759	0.517241
24	Dox1Day8	smooth/plexi	0.466667	0.533333
24	Dox1Day8	smooth/plexi	0.592593	0.592593
24	Dox1Day8	smooth/plexi	0.451613	0.548387
24	Dox1Day8	smooth/plexi	0.48	0.52
24	Dox1Day8	smooth/plexi	0.461538	0.538462
24	Dox1Day8	smooth/plexi	0.483871	0.516129
24	Dox1Day8	smooth/plexi	0.44	0.56
24	Dox1Day8	smooth/plexi	0.533333	0.533333
24	Dox1Day8	smooth/plexi	0.44	0.56
24	Dox1Day8	smooth/plexi	0.464286	0.535714
17	Dox1Day8	coated/Syl	0.56	0.56
17	Dox1Day8	coated/Syl	0.52381	0.52381
17	Dox1Day8	coated/Syl	0.47619	0.52381
17	Dox1Day8	coated/Syl	0.545455	0.545455
17	Dox1Day8	coated/Syl	0.44	0.56
17	Dox1Day8	coated/Syl	0.541667	0.541667
17	Dox1Day8	coated/Syl	0.47619	0.52381
17	Dox1Day8	coated/Syl	0.478261	0.521739
17	Dox1Day8	coated/Syl	0.52381	0.52381
17	Dox1Day8	coated/Syl	0.526316	0.526316
18	Dox1Day8	coated/Syl	0.684211	0.684211
18	Dox1Day8	coated/Syl	0.6	0.6
18	Dox1Day8	coated/Syl	0.583333	0.583333
18	Dox1Day8	coated/Syl	0.346154	0.653846
18	Dox1Day8	coated/Syl	0.409091	0.590909
18	Dox1Day8	coated/Syl	0.842105	0.842105
18	Dox1Day8	coated/Syl	0.35	0.65
18	Dox1Day8	coated/Syl	0.458333	0.541667
18	Dox1Day8	coated/Syl	0.5	0.5
19	Dox1Day8	coated/Syl	0.458333	0.541667
19	Dox1Day8	coated/Syl	0.521739	0.521739
19	Dox1Day8	coated/Syl	0.458333	0.541667
19	Dox1Day8	coated/Syl	0.583333	0.583333
19	Dox1Day8	coated/Syl	0.466667	0.533333
19	Dox1Day8	coated/Syl	0.566667	0.566667
19	Dox1Day8	coated/Syl	0.580645	0.580645
19	Dox1Day8	coated/Syl	0.5	0.5
19	Dox1Day8	coated/Syl	0.533333	0.533333
20	Dox1Day8	coated/Syl	0.5	0.5
20	Dox1Day8	coated/Syl	0.545455	0.545455
20	Dox1Day8	coated/Syl	0.277778	0.722222
20	Dox1Day8	coated/Syl	0.222222	0.777778
20	Dox1Day8	coated/Syl	0.391304	0.608696
20	Dox1Day8	coated/Syl	0.391304	0.608696
20	Dox1Day8	coated/Syl	0.454545	0.545455
20	Dox1Day8	coated/Syl	0.473684	0.526316
20	Dox1Day8	coated/Syl	0.481481	0.518519
20	Dox1Day8	coated/Syl	0.578947	0.578947
21	Dox1Day8	coated/Syl	0.478261	0.521739
21	Dox1Day8	coated/Syl	0.481481	0.518519
21	Dox1Day8	coated/Syl	0.541667	0.541667
21	Dox1Day8	coated/Syl	0.606061	0.606061
21	Dox1Day8	coated/Syl	0.428571	0.571429
21	Dox1Day8	coated/Syl	0.407407	0.592593
21	Dox1Day8	coated/Syl	0.590909	0.590909
21	Dox1Day8	coated/Syl	0.416667	0.583333
21	Dox1Day8	coated/Syl	0.586207	0.586207
21	Dox1Day8	coated/Syl	0.294118	0.705882
21	Dox1Day8	coated/Syl	0.434783	0.565217
22	Dox1Day8	coated/Syl	0.5	0.5
22	Dox1Day8	coated/Syl	0.636364	0.636364
22	Dox1Day8	coated/Syl	0.454545	0.545455
22	Dox1Day8	coated/Syl	0.421053	0.578947
22	Dox1Day8	coated/Syl	0.55	0.55
22	Dox1Day8	coated/Syl	0.25	0.75
22	Dox1Day8	coated/Syl	0.263158	0.736842
22	Dox1Day8	coated/Syl	1	1
22	Dox1Day8	coated/Syl	0.2	0.8
22	Dox1Day8	coated/Syl	0.333333	0.666667
22	Dox1Day8	coated/Syl	0.294118	0.705882
23	Dox1Day8	coated/Syl	0.47619	0.52381
23	Dox1Day8	coated/Syl	0.526316	0.526316
23	Dox1Day8	coated/Syl	0.277778	0.722222
23	Dox1Day8	coated/Syl	0.421053	0.578947
23	Dox1Day8	coated/Syl	0.777778	0.777778
23	Dox1Day8	coated/Syl	0.897143	0.897143
23	Dox1Day8	coated/Syl	0.333333	0.666667
23	Dox1Day8	coated/Syl	0.35	0.65
23	Dox1Day8	coated/Syl	0.380952	0.619048
23	Dox1Day8	coated/Syl	0.454545	0.545455
23	Dox1Day8	coated/Syl	0.4	0.6
24	Dox1Day8	coated/Syl	0.454545	0.545455
24	Dox1Day8	coated/Syl	0.45	0.55
24	Dox1Day8	coated/Syl	0.521739	0.521739
24	Dox1Day8	coated/Syl	0.565217	0.565217
24	Dox1Day8	coated/Syl	0.428571	0.571429
24	Dox1Day8	coated/Syl	0.545455	0.545455
24	Dox1Day8	coated/Syl	0.5	0.5
24	Dox1Day8	coated/Syl	0.5	0.5
24	Dox1Day8	coated/Syl	0.434783	0.565217
24	Dox1Day8	coated/Syl	0.409091	0.590909
17	DoxOff	smooth/plexi	0.4	0.6
17	DoxOff	smooth/plexi	0.526316	0.526316
17	DoxOff	smooth/plexi	0.435897	0.564103
17	DoxOff	smooth/plexi	0.459459	0.540541
17	DoxOff	smooth/plexi	0.44	0.56
17	DoxOff	smooth/plexi	0.428571	0.571429
17	DoxOff	smooth/plexi	0.444444	0.555556
17	DoxOff	smooth/plexi	0.464286	0.535714
17	DoxOff	smooth/plexi	0.481481	0.518519
17	DoxOff	smooth/plexi	0.414634	0.585366
17	DoxOff	smooth/plexi	0.428571	0.571429
18	DoxOff	smooth/plexi	0.5	0.5
18	DoxOff	smooth/plexi	0.48	0.52
18	DoxOff	smooth/plexi	0.545455	0.545455
18	DoxOff	smooth/plexi	0.4375	0.5625
18	DoxOff	smooth/plexi	0.538462	0.538462
18	DoxOff	smooth/plexi	0.52	0.52
18	DoxOff	smooth/plexi	0.464286	0.535714
18	DoxOff	smooth/plexi	0.5	0.5
18	DoxOff	smooth/plexi	0.52	0.52
18	DoxOff	smooth/plexi	0.583333	0.583333
19	DoxOff	smooth/plexi	0.53125	0.53125
19	DoxOff	smooth/plexi	0.541667	0.541667
19	DoxOff	smooth/plexi	0.608696	0.608696
19	DoxOff	smooth/plexi	0.472222	0.527778
19	DoxOff	smooth/plexi	0.533333	0.533333
19	DoxOff	smooth/plexi	0.607143	0.607143
19	DoxOff	smooth/plexi	0.515152	0.515152
19	DoxOff	smooth/plexi	0.551724	0.551724
19	DoxOff	smooth/plexi	0.435897	0.564103
19	DoxOff	smooth/plexi	0.485714	0.514286
20	DoxOff	smooth/plexi	0.425	0.575
20	DoxOff	smooth/plexi	0.483871	0.516129
20	DoxOff	smooth/plexi	0.482759	0.517241
20	DoxOff	smooth/plexi	0.514286	0.514286
20	DoxOff	smooth/plexi	0.483871	0.516129
20	DoxOff	smooth/plexi	0.444444	0.555556
20	DoxOff	smooth/plexi	0.484848	0.515152
20	DoxOff	smooth/plexi	0.481481	0.518519
20	DoxOff	smooth/plexi	0.5	0.5
20	DoxOff	smooth/plexi	0.390244	0.609756
21	DoxOff	smooth/plexi	0.466667	0.533333
21	DoxOff	smooth/plexi	0.451613	0.548387
21	DoxOff	smooth/plexi	0.423077	0.576923
21	DoxOff	smooth/plexi	0.441176	0.558824
21	DoxOff	smooth/plexi	0.461538	0.538462
21	DoxOff	smooth/plexi	0.4375	0.5625
21	DoxOff	smooth/plexi	0.482759	0.517241
21	DoxOff	smooth/plexi	0.423077	0.576923
21	DoxOff	smooth/plexi	0.516129	0.516129
21	DoxOff	smooth/plexi	0.513514	0.513514
21	DoxOff	smooth/plexi	0.470588	0.529412
22	DoxOff	smooth/plexi	0.608696	0.608696
22	DoxOff	smooth/plexi	0.448276	0.551724
22	DoxOff	smooth/plexi	0.482759	0.517241
22	DoxOff	smooth/plexi	0.5	0.5
22	DoxOff	smooth/plexi	0.565217	0.565217
22	DoxOff	smooth/plexi	0.538462	0.538462
22	DoxOff	smooth/plexi	0.583333	0.583333
22	DoxOff	smooth/plexi	0.548387	0.548387
22	DoxOff	smooth/plexi	0.5	0.5
23	DoxOff	smooth/plexi	0.5	0.5
23	DoxOff	smooth/plexi	0.47619	0.52381
23	DoxOff	smooth/plexi	0.464286	0.535714
23	DoxOff	smooth/plexi	0.48	0.52
23	DoxOff	smooth/plexi	0.5	0.5
23	DoxOff	smooth/plexi	0.461538	0.538462
23	DoxOff	smooth/plexi	0.5	0.5
23	DoxOff	smooth/plexi	0.621622	0.621622
23	DoxOff	smooth/plexi	0.482759	0.517241
23	DoxOff	smooth/plexi	0.571429	0.571429
24	DoxOff	smooth/plexi	0.444444	0.555556
24	DoxOff	smooth/plexi	0.451613	0.548387
24	DoxOff	smooth/plexi	0.461538	0.538462
24	DoxOff	smooth/plexi	0.555556	0.555556
24	DoxOff	smooth/plexi	0.483871	0.516129
24	DoxOff	smooth/plexi	0.46875	0.53125
24	DoxOff	smooth/plexi	0.410256	0.589744
24	DoxOff	smooth/plexi	0.464286	0.535714
24	DoxOff	smooth/plexi	0.52	0.52
24	DoxOff	smooth/plexi	0.483871	0.516129
24	DoxOff	smooth/plexi	0.416667	0.583333
17	DoxOff	coated/Syl	0.457143	0.542857
17	DoxOff	coated/Syl	0.5	0.5
17	DoxOff	coated/Syl	0.433333	0.566667
17	DoxOff	coated/Syl	0.5	0.5
17	DoxOff	coated/Syl	0.535714	0.535714
17	DoxOff	coated/Syl	0.5	0.5
17	DoxOff	coated/Syl	0.441176	0.558824
17	DoxOff	coated/Syl	0.5	0.5
17	DoxOff	coated/Syl	0.464286	0.535714
18	DoxOff	coated/Syl	0.481481	0.518519
18	DoxOff	coated/Syl	0.4	0.6
18	DoxOff	coated/Syl	0.583333	0.583333
18	DoxOff	coated/Syl	0.666667	0.666667
18	DoxOff	coated/Syl	0.5	0.5
18	DoxOff	coated/Syl	0.571429	0.571429
18	DoxOff	coated/Syl	0.521739	0.521739
18	DoxOff	coated/Syl	0.538462	0.538462
18	DoxOff	coated/Syl	0.576923	0.576923
19	DoxOff	coated/Syl	0.459459	0.540541
19	DoxOff	coated/Syl	0.419355	0.580645
19	DoxOff	coated/Syl	0.461538	0.538462
19	DoxOff	coated/Syl	0.576923	0.576923
19	DoxOff	coated/Syl	0.451613	0.548387
19	DoxOff	coated/Syl	0.555556	0.555556
19	DoxOff	coated/Syl	0.576923	0.576923
19	DoxOff	coated/Syl	0.6	0.6
19	DoxOff	coated/Syl	0.516129	0.516129
19	DoxOff	coated/Syl	0.551724	0.551724
20	DoxOff	coated/Syl	0.464286	0.535714
20	DoxOff	coated/Syl	0.461538	0.538462
20	DoxOff	coated/Syl	0.444444	0.555556
20	DoxOff	coated/Syl	0.44	0.56
20	DoxOff	coated/Syl	0.555556	0.555556
20	DoxOff	coated/Syl	0.435897	0.564103
20	DoxOff	coated/Syl	0.48	0.52
20	DoxOff	coated/Syl	0.470588	0.529412
20	DoxOff	coated/Syl	0.5	0.5
20	DoxOff	coated/Syl	0.48	0.52
21	DoxOff	coated/Syl	0.464286	0.535714
21	DoxOff	coated/Syl	0.5	0.5
21	DoxOff	coated/Syl	0.5	0.5
21	DoxOff	coated/Syl	0.454545	0.545455
21	DoxOff	coated/Syl	0.538462	0.538462
21	DoxOff	coated/Syl	0.541667	0.541667
21	DoxOff	coated/Syl	0.5	0.5
21	DoxOff	coated/Syl	0.409091	0.590909
22	DoxOff	coated/Syl	0.52	0.52
22	DoxOff	coated/Syl	0.5	0.5
22	DoxOff	coated/Syl	0.52	0.52
22	DoxOff	coated/Syl	0.541667	0.541667
22	DoxOff	coated/Syl	0.576923	0.576923
22	DoxOff	coated/Syl	0.631579	0.631579
22	DoxOff	coated/Syl	0.583333	0.583333
22	DoxOff	coated/Syl	0.473684	0.526316
22	DoxOff	coated/Syl	0.545455	0.545455
23	DoxOff	coated/Syl	0.5	0.5
23	DoxOff	coated/Syl	0.478261	0.521739
23	DoxOff	coated/Syl	0.458333	0.541667
23	DoxOff	coated/Syl	0.52381	0.52381
23	DoxOff	coated/Syl	0.48	0.52
23	DoxOff	coated/Syl	0.478261	0.521739
23	DoxOff	coated/Syl	0.545455	0.545455
23	DoxOff	coated/Syl	0.666667	0.666667
23	DoxOff	coated/Syl	0.571429	0.571429
23	DoxOff	coated/Syl	0.631579	0.631579
24	DoxOff	coated/Syl	0.617647	0.617647
24	DoxOff	coated/Syl	0.533333	0.533333
24	DoxOff	coated/Syl	0.44	0.56
24	DoxOff	coated/Syl	0.481481	0.518519
24	DoxOff	coated/Syl	0.5	0.5
24	DoxOff	coated/Syl	0.48	0.52
24	DoxOff	coated/Syl	0.423077	0.576923
24	DoxOff	coated/Syl	0.538462	0.538462
24	DoxOff	coated/Syl	0.416667	0.583333
24	DoxOff	coated/Syl	0.48	0.52

## Sheet: L-R_hindlimbs
Animal_ID	Time_ID	Step_surface	L-R_hindlimb_rawPhase	L-R_hindlimb_transPhase
17	Baseline	smooth/plexi	0.484848	0.515152
17	Baseline	smooth/plexi	0.488372	0.511628
17	Baseline	smooth/plexi	0.482759	0.517241
17	Baseline	smooth/plexi	0.428571	0.571429
17	Baseline	smooth/plexi	0.413793	0.586207
17	Baseline	smooth/plexi	0.451613	0.548387
17	Baseline	smooth/plexi	0.448276	0.551724
17	Baseline	smooth/plexi	0.46875	0.53125
17	Baseline	smooth/plexi	0.5	0.5
17	Baseline	smooth/plexi	0.419355	0.580645
17	Baseline	smooth/plexi	0.46875	0.53125
17	Baseline	smooth/plexi	0.433333	0.566667
18	Baseline	smooth/plexi	0.513514	0.513514
18	Baseline	smooth/plexi	0.529412	0.529412
18	Baseline	smooth/plexi	0.46875	0.53125
18	Baseline	smooth/plexi	0.533333	0.533333
18	Baseline	smooth/plexi	0.421053	0.578947
18	Baseline	smooth/plexi	0.5	0.5
18	Baseline	smooth/plexi	0.5	0.5
18	Baseline	smooth/plexi	0.483871	0.516129
18	Baseline	smooth/plexi	0.461538	0.538462
18	Baseline	smooth/plexi	0.529412	0.529412
19	Baseline	smooth/plexi	0.454545	0.545455
19	Baseline	smooth/plexi	0.555556	0.555556
19	Baseline	smooth/plexi	0.5625	0.5625
19	Baseline	smooth/plexi	0.53125	0.53125
19	Baseline	smooth/plexi	0.5	0.5
19	Baseline	smooth/plexi	0.533333	0.533333
19	Baseline	smooth/plexi	0.470588	0.529412
19	Baseline	smooth/plexi	0.59375	0.59375
19	Baseline	smooth/plexi	0.590909	0.590909
19	Baseline	smooth/plexi	0.551724	0.551724
19	Baseline	smooth/plexi	0.551724	0.551724
19	Baseline	smooth/plexi	0.615385	0.615385
20	Baseline	smooth/plexi	0.485714	0.514286
20	Baseline	smooth/plexi	0.457143	0.542857
20	Baseline	smooth/plexi	0.447368	0.552632
20	Baseline	smooth/plexi	0.472222	0.527778
20	Baseline	smooth/plexi	0.5	0.5
20	Baseline	smooth/plexi	0.457143	0.542857
20	Baseline	smooth/plexi	0.588235	0.588235
20	Baseline	smooth/plexi	0.487179	0.512821
21	Baseline	smooth/plexi	0.513514	0.513514
21	Baseline	smooth/plexi	0.473684	0.526316
21	Baseline	smooth/plexi	0.441176	0.558824
21	Baseline	smooth/plexi	0.5	0.5
21	Baseline	smooth/plexi	0.517241	0.517241
21	Baseline	smooth/plexi	0.5	0.5
21	Baseline	smooth/plexi	0.566667	0.566667
21	Baseline	smooth/plexi	0.540541	0.540541
21	Baseline	smooth/plexi	0.46875	0.53125
21	Baseline	smooth/plexi	0.419355	0.580645
22	Baseline	smooth/plexi	0.484848	0.515152
22	Baseline	smooth/plexi	0.483871	0.516129
22	Baseline	smooth/plexi	0.484848	0.515152
22	Baseline	smooth/plexi	0.5	0.5
22	Baseline	smooth/plexi	0.533333	0.533333
22	Baseline	smooth/plexi	0.538462	0.538462
22	Baseline	smooth/plexi	0.548387	0.548387
22	Baseline	smooth/plexi	0.515152	0.515152
22	Baseline	smooth/plexi	0.458333	0.541667
22	Baseline	smooth/plexi	0.37931	0.62069
22	Baseline	smooth/plexi	0.586207	0.586207
22	Baseline	smooth/plexi	0.515152	0.515152
23	Baseline	smooth/plexi	0.5	0.5
23	Baseline	smooth/plexi	0.470588	0.529412
23	Baseline	smooth/plexi	0.457143	0.542857
23	Baseline	smooth/plexi	0.542857	0.542857
23	Baseline	smooth/plexi	0.518519	0.518519
23	Baseline	smooth/plexi	0.40625	0.59375
23	Baseline	smooth/plexi	0.485714	0.514286
23	Baseline	smooth/plexi	0.517241	0.517241
23	Baseline	smooth/plexi	0.484848	0.515152
23	Baseline	smooth/plexi	0.513514	0.513514
24	Baseline	smooth/plexi	0.512195	0.512195
24	Baseline	smooth/plexi	0.516129	0.516129
24	Baseline	smooth/plexi	0.513514	0.513514
24	Baseline	smooth/plexi	0.457143	0.542857
24	Baseline	smooth/plexi	0.454545	0.545455
24	Baseline	smooth/plexi	0.517241	0.517241
17	Baseline	coated/Syl	0.4375	0.5625
17	Baseline	coated/Syl	0.483871	0.516129
17	Baseline	coated/Syl	0.466667	0.533333
17	Baseline	coated/Syl	0.612903	0.612903
17	Baseline	coated/Syl	0.53125	0.53125
17	Baseline	coated/Syl	0.5	0.5
17	Baseline	coated/Syl	0.451613	0.548387
17	Baseline	coated/Syl	0.454545	0.545455
17	Baseline	coated/Syl	0.548387	0.548387
17	Baseline	coated/Syl	0.5	0.5
17	Baseline	coated/Syl	0.555556	0.555556
17	Baseline	coated/Syl	0.538462	0.538462
18	Baseline	coated/Syl	0.464286	0.535714
18	Baseline	coated/Syl	0.580645	0.580645
18	Baseline	coated/Syl	0.483871	0.516129
18	Baseline	coated/Syl	0.464286	0.535714
18	Baseline	coated/Syl	0.53125	0.53125
18	Baseline	coated/Syl	0.466667	0.533333
18	Baseline	coated/Syl	0.625	0.625
18	Baseline	coated/Syl	0.53125	0.53125
19	Baseline	coated/Syl	0.515152	0.515152
19	Baseline	coated/Syl	0.5	0.5
19	Baseline	coated/Syl	0.6	0.6
19	Baseline	coated/Syl	0.583333	0.583333
19	Baseline	coated/Syl	0.518519	0.518519
19	Baseline	coated/Syl	0.5625	0.5625
19	Baseline	coated/Syl	0.535714	0.535714
19	Baseline	coated/Syl	0.52	0.52
19	Baseline	coated/Syl	0.541667	0.541667
20	Baseline	coated/Syl	0.5	0.5
20	Baseline	coated/Syl	0.535714	0.535714
20	Baseline	coated/Syl	0.615385	0.615385
20	Baseline	coated/Syl	0.5	0.5
20	Baseline	coated/Syl	0.481481	0.518519
20	Baseline	coated/Syl	0.482759	0.517241
20	Baseline	coated/Syl	0.53125	0.53125
20	Baseline	coated/Syl	0.542857	0.542857
20	Baseline	coated/Syl	0.46875	0.53125
20	Baseline	coated/Syl	0.484848	0.515152
21	Baseline	coated/Syl	0.475	0.525
21	Baseline	coated/Syl	0.484848	0.515152
21	Baseline	coated/Syl	0.483871	0.516129
21	Baseline	coated/Syl	0.5	0.5
21	Baseline	coated/Syl	0.518519	0.518519
21	Baseline	coated/Syl	0.517241	0.517241
21	Baseline	coated/Syl	0.5	0.5
21	Baseline	coated/Syl	0.576923	0.576923
21	Baseline	coated/Syl	0.56	0.56
21	Baseline	coated/Syl	0.535714	0.535714
22	Baseline	coated/Syl	0.555556	0.555556
22	Baseline	coated/Syl	0.535714	0.535714
22	Baseline	coated/Syl	0.636364	0.636364
22	Baseline	coated/Syl	0.484848	0.515152
22	Baseline	coated/Syl	0.5	0.5
22	Baseline	coated/Syl	0.565217	0.565217
22	Baseline	coated/Syl	0.5	0.5
22	Baseline	coated/Syl	0.565217	0.565217
22	Baseline	coated/Syl	0.518519	0.518519
22	Baseline	coated/Syl	0.62069	0.62069
23	Baseline	coated/Syl	0.458333	0.541667
23	Baseline	coated/Syl	0.551724	0.551724
23	Baseline	coated/Syl	0.517241	0.517241
23	Baseline	coated/Syl	0.545455	0.545455
23	Baseline	coated/Syl	0.461538	0.538462
23	Baseline	coated/Syl	0.586207	0.586207
23	Baseline	coated/Syl	0.555556	0.555556
23	Baseline	coated/Syl	0.62963	0.62963
23	Baseline	coated/Syl	0.666667	0.666667
24	Baseline	coated/Syl	0.5	0.5
24	Baseline	coated/Syl	0.428571	0.571429
24	Baseline	coated/Syl	0.5	0.5
24	Baseline	coated/Syl	0.566667	0.566667
24	Baseline	coated/Syl	0.5	0.5
24	Baseline	coated/Syl	0.517241	0.517241
24	Baseline	coated/Syl	0.5	0.5
24	Baseline	coated/Syl	0.444444	0.555556
24	Baseline	coated/Syl	0.518519	0.518519
24	Baseline	coated/Syl	0.541667	0.541667
17	PreDox1	smooth/plexi	0.472222	0.527778
17	PreDox1	smooth/plexi	0.428571	0.571429
17	PreDox1	smooth/plexi	0.459459	0.540541
17	PreDox1	smooth/plexi	0.464286	0.535714
17	PreDox1	smooth/plexi	0.6	0.6
17	PreDox1	smooth/plexi	0.516129	0.516129
17	PreDox1	smooth/plexi	0.448276	0.551724
17	PreDox1	smooth/plexi	0.533333	0.533333
17	PreDox1	smooth/plexi	0.564103	0.564103
17	PreDox1	smooth/plexi	0.413793	0.586207
17	PreDox1	smooth/plexi	0.551724	0.551724
17	PreDox1	smooth/plexi	0.416667	0.583333
17	PreDox1	smooth/plexi	0.40625	0.59375
18	PreDox1	smooth/plexi	0.608696	0.608696
18	PreDox1	smooth/plexi	0.514286	0.514286
18	PreDox1	smooth/plexi	0.46875	0.53125
18	PreDox1	smooth/plexi	0.484848	0.515152
18	PreDox1	smooth/plexi	0.5	0.5
18	PreDox1	smooth/plexi	0.438596	0.561404
18	PreDox1	smooth/plexi	0.415094	0.584906
18	PreDox1	smooth/plexi	0.481481	0.518519
18	PreDox1	smooth/plexi	0.421053	0.578947
18	PreDox1	smooth/plexi	0.533333	0.533333
18	PreDox1	smooth/plexi	0.454545	0.545455
18	PreDox1	smooth/plexi	0.482759	0.517241
19	PreDox1	smooth/plexi	0.6	0.6
19	PreDox1	smooth/plexi	0.5	0.5
19	PreDox1	smooth/plexi	0.5	0.5
19	PreDox1	smooth/plexi	0.615385	0.615385
19	PreDox1	smooth/plexi	0.533333	0.533333
19	PreDox1	smooth/plexi	0.607143	0.607143
19	PreDox1	smooth/plexi	0.5	0.5
19	PreDox1	smooth/plexi	0.5	0.5
19	PreDox1	smooth/plexi	0.434783	0.565217
19	PreDox1	smooth/plexi	0.487179	0.512821
20	PreDox1	smooth/plexi	0.5	0.5
20	PreDox1	smooth/plexi	0.428571	0.571429
20	PreDox1	smooth/plexi	0.548387	0.548387
20	PreDox1	smooth/plexi	0.514286	0.514286
20	PreDox1	smooth/plexi	0.485714	0.514286
20	PreDox1	smooth/plexi	0.5	0.5
20	PreDox1	smooth/plexi	0.481481	0.518519
20	PreDox1	smooth/plexi	0.444444	0.555556
20	PreDox1	smooth/plexi	0.484848	0.515152
20	PreDox1	smooth/plexi	0.5	0.5
20	PreDox1	smooth/plexi	0.529412	0.529412
20	PreDox1	smooth/plexi	0.441176	0.558824
21	PreDox1	smooth/plexi	0.423077	0.576923
21	PreDox1	smooth/plexi	0.515152	0.515152
21	PreDox1	smooth/plexi	0.37931	0.62069
21	PreDox1	smooth/plexi	0.551724	0.551724
21	PreDox1	smooth/plexi	0.470588	0.529412
21	PreDox1	smooth/plexi	0.463415	0.536585
21	PreDox1	smooth/plexi	0.413793	0.586207
21	PreDox1	smooth/plexi	0.551724	0.551724
21	PreDox1	smooth/plexi	0.483871	0.516129
21	PreDox1	smooth/plexi	0.487179	0.512821
22	PreDox1	smooth/plexi	0.551724	0.551724
22	PreDox1	smooth/plexi	0.533333	0.533333
22	PreDox1	smooth/plexi	0.464286	0.535714
22	PreDox1	smooth/plexi	0.44	0.56
22	PreDox1	smooth/plexi	0.484848	0.515152
22	PreDox1	smooth/plexi	0.551724	0.551724
22	PreDox1	smooth/plexi	0.457143	0.542857
22	PreDox1	smooth/plexi	0.514286	0.514286
22	PreDox1	smooth/plexi	0.40625	0.59375
22	PreDox1	smooth/plexi	0.5	0.5
22	PreDox1	smooth/plexi	0.538462	0.538462
23	PreDox1	smooth/plexi	0.594595	0.594595
23	PreDox1	smooth/plexi	0.529412	0.529412
23	PreDox1	smooth/plexi	0.483871	0.516129
23	PreDox1	smooth/plexi	0.6	0.6
23	PreDox1	smooth/plexi	0.548387	0.548387
23	PreDox1	smooth/plexi	0.481481	0.518519
23	PreDox1	smooth/plexi	0.586207	0.586207
23	PreDox1	smooth/plexi	0.62069	0.62069
23	PreDox1	smooth/plexi	0.555556	0.555556
23	PreDox1	smooth/plexi	0.615385	0.615385
23	PreDox1	smooth/plexi	0.571429	0.571429
24	PreDox1	smooth/plexi	0.482759	0.517241
24	PreDox1	smooth/plexi	0.444444	0.555556
24	PreDox1	smooth/plexi	0.537037	0.537037
24	PreDox1	smooth/plexi	0.47541	0.52459
24	PreDox1	smooth/plexi	0.44898	0.55102
24	PreDox1	smooth/plexi	0.560976	0.560976
24	PreDox1	smooth/plexi	0.5	0.5
24	PreDox1	smooth/plexi	0.533333	0.533333
24	PreDox1	smooth/plexi	0.448276	0.551724
24	PreDox1	smooth/plexi	0.511628	0.511628
17	PreDox1	coated/Syl	0.384615	0.615385
17	PreDox1	coated/Syl	0.5	0.5
17	PreDox1	coated/Syl	0.407407	0.592593
17	PreDox1	coated/Syl	0.413793	0.586207
17	PreDox1	coated/Syl	0.478261	0.521739
17	PreDox1	coated/Syl	0.5	0.5
17	PreDox1	coated/Syl	0.423077	0.576923
17	PreDox1	coated/Syl	0.44	0.56
17	PreDox1	coated/Syl	0.52	0.52
17	PreDox1	coated/Syl	0.478261	0.521739
18	PreDox1	coated/Syl	0.5	0.5
18	PreDox1	coated/Syl	0.535714	0.535714
18	PreDox1	coated/Syl	0.481481	0.518519
18	PreDox1	coated/Syl	0.423077	0.576923
18	PreDox1	coated/Syl	0.464286	0.535714
18	PreDox1	coated/Syl	0.538462	0.538462
18	PreDox1	coated/Syl	0.5	0.5
18	PreDox1	coated/Syl	0.6	0.6
18	PreDox1	coated/Syl	0.517241	0.517241
18	PreDox1	coated/Syl	0.421053	0.578947
18	PreDox1	coated/Syl	0.36	0.64
19	PreDox1	coated/Syl	0.517241	0.517241
19	PreDox1	coated/Syl	0.517241	0.517241
19	PreDox1	coated/Syl	0.481481	0.518519
19	PreDox1	coated/Syl	0.548387	0.548387
19	PreDox1	coated/Syl	0.518519	0.518519
19	PreDox1	coated/Syl	0.518519	0.518519
19	PreDox1	coated/Syl	0.56	0.56
19	PreDox1	coated/Syl	0.566667	0.566667
19	PreDox1	coated/Syl	0.588235	0.588235
20	PreDox1	coated/Syl	0.423077	0.576923
20	PreDox1	coated/Syl	0.5	0.5
20	PreDox1	coated/Syl	0.428571	0.571429
20	PreDox1	coated/Syl	0.482759	0.517241
20	PreDox1	coated/Syl	0.461538	0.538462
20	PreDox1	coated/Syl	0.481481	0.518519
20	PreDox1	coated/Syl	0.451613	0.548387
20	PreDox1	coated/Syl	0.529412	0.529412
20	PreDox1	coated/Syl	0.482759	0.517241
20	PreDox1	coated/Syl	0.566667	0.566667
20	PreDox1	coated/Syl	0.53125	0.53125
20	PreDox1	coated/Syl	0.576923	0.576923
20	PreDox1	coated/Syl	0.566667	0.566667
21	PreDox1	coated/Syl	0.37931	0.62069
21	PreDox1	coated/Syl	0.451613	0.548387
21	PreDox1	coated/Syl	0.444444	0.555556
21	PreDox1	coated/Syl	0.414634	0.585366
21	PreDox1	coated/Syl	0.52	0.52
21	PreDox1	coated/Syl	0.483871	0.516129
21	PreDox1	coated/Syl	0.483871	0.516129
21	PreDox1	coated/Syl	0.4	0.6
21	PreDox1	coated/Syl	0.555556	0.555556
21	PreDox1	coated/Syl	0.5	0.5
21	PreDox1	coated/Syl	0.516129	0.516129
21	PreDox1	coated/Syl	0.448276	0.551724
22	PreDox1	coated/Syl	0.5	0.5
22	PreDox1	coated/Syl	0.555556	0.555556
22	PreDox1	coated/Syl	0.555556	0.555556
22	PreDox1	coated/Syl	0.592593	0.592593
22	PreDox1	coated/Syl	0.555556	0.555556
22	PreDox1	coated/Syl	0.518519	0.518519
22	PreDox1	coated/Syl	0.419355	0.580645
22	PreDox1	coated/Syl	0.548387	0.548387
22	PreDox1	coated/Syl	0.555556	0.555556
22	PreDox1	coated/Syl	0.516129	0.516129
22	PreDox1	coated/Syl	0.576923	0.576923
22	PreDox1	coated/Syl	0.48	0.52
23	PreDox1	coated/Syl	0.6	0.6
23	PreDox1	coated/Syl	0.5	0.5
23	PreDox1	coated/Syl	0.448276	0.551724
23	PreDox1	coated/Syl	0.526316	0.526316
23	PreDox1	coated/Syl	0.538462	0.538462
23	PreDox1	coated/Syl	0.52	0.52
23	PreDox1	coated/Syl	0.521739	0.521739
23	PreDox1	coated/Syl	0.56	0.56
23	PreDox1	coated/Syl	0.48	0.52
23	PreDox1	coated/Syl	0.5	0.5
24	PreDox1	coated/Syl	0.448276	0.551724
24	PreDox1	coated/Syl	0.444444	0.555556
24	PreDox1	coated/Syl	0.521739	0.521739
24	PreDox1	coated/Syl	0.461538	0.538462
24	PreDox1	coated/Syl	0.56	0.56
24	PreDox1	coated/Syl	0.565217	0.565217
24	PreDox1	coated/Syl	0.64	0.64
24	PreDox1	coated/Syl	0.538462	0.538462
24	PreDox1	coated/Syl	0.413793	0.586207
24	PreDox1	coated/Syl	0.464286	0.535714
17	Dox1Day5	smooth/plexi	0.571429	0.571429
17	Dox1Day5	smooth/plexi	0.5	0.5
17	Dox1Day5	smooth/plexi	0.466667	0.533333
17	Dox1Day5	smooth/plexi	0.551724	0.551724
17	Dox1Day5	smooth/plexi	0.517241	0.517241
17	Dox1Day5	smooth/plexi	0.555556	0.555556
17	Dox1Day5	smooth/plexi	0.516129	0.516129
17	Dox1Day5	smooth/plexi	0.483871	0.516129
17	Dox1Day5	smooth/plexi	0.432432	0.567568
17	Dox1Day5	smooth/plexi	0.516129	0.516129
17	Dox1Day5	smooth/plexi	0.516129	0.516129
17	Dox1Day5	smooth/plexi	0.5	0.5
18	Dox1Day5	smooth/plexi	0.518519	0.518519
18	Dox1Day5	smooth/plexi	0.56	0.56
18	Dox1Day5	smooth/plexi	0.518519	0.518519
18	Dox1Day5	smooth/plexi	0.5	0.5
18	Dox1Day5	smooth/plexi	0.590909	0.590909
18	Dox1Day5	smooth/plexi	0.625	0.625
18	Dox1Day5	smooth/plexi	0.52	0.52
18	Dox1Day5	smooth/plexi	0.555556	0.555556
18	Dox1Day5	smooth/plexi	0.592593	0.592593
18	Dox1Day5	smooth/plexi	0.538462	0.538462
19	Dox1Day5	smooth/plexi	0.538462	0.538462
19	Dox1Day5	smooth/plexi	0.5	0.5
19	Dox1Day5	smooth/plexi	0.517241	0.517241
19	Dox1Day5	smooth/plexi	0.533333	0.533333
19	Dox1Day5	smooth/plexi	0.481481	0.518519
19	Dox1Day5	smooth/plexi	0.516129	0.516129
19	Dox1Day5	smooth/plexi	0.52	0.52
19	Dox1Day5	smooth/plexi	0.5	0.5
19	Dox1Day5	smooth/plexi	0.5	0.5
19	Dox1Day5	smooth/plexi	0.533333	0.533333
20	Dox1Day5	smooth/plexi	0.652174	0.652174
20	Dox1Day5	smooth/plexi	0.482759	0.517241
20	Dox1Day5	smooth/plexi	0.4	0.6
20	Dox1Day5	smooth/plexi	0.37037	0.62963
20	Dox1Day5	smooth/plexi	0.575758	0.575758
20	Dox1Day5	smooth/plexi	0.538462	0.538462
20	Dox1Day5	smooth/plexi	0.478261	0.521739
20	Dox1Day5	smooth/plexi	0.482759	0.517241
20	Dox1Day5	smooth/plexi	0.48	0.52
20	Dox1Day5	smooth/plexi	0.590909	0.590909
21	Dox1Day5	smooth/plexi	0.482759	0.517241
21	Dox1Day5	smooth/plexi	0.4	0.6
21	Dox1Day5	smooth/plexi	0.384615	0.615385
21	Dox1Day5	smooth/plexi	0.5	0.5
21	Dox1Day5	smooth/plexi	0.580645	0.580645
21	Dox1Day5	smooth/plexi	0.464286	0.535714
21	Dox1Day5	smooth/plexi	0.423077	0.576923
21	Dox1Day5	smooth/plexi	0.46875	0.53125
21	Dox1Day5	smooth/plexi	0.5	0.5
21	Dox1Day5	smooth/plexi	0.53125	0.53125
22	Dox1Day5	smooth/plexi	0.538462	0.538462
22	Dox1Day5	smooth/plexi	0.541667	0.541667
22	Dox1Day5	smooth/plexi	0.56	0.56
22	Dox1Day5	smooth/plexi	0.5	0.5
22	Dox1Day5	smooth/plexi	0.535714	0.535714
22	Dox1Day5	smooth/plexi	0.576923	0.576923
22	Dox1Day5	smooth/plexi	0.538462	0.538462
22	Dox1Day5	smooth/plexi	0.458333	0.541667
22	Dox1Day5	smooth/plexi	0.517241	0.517241
22	Dox1Day5	smooth/plexi	0.46875	0.53125
23	Dox1Day5	smooth/plexi	0.5	0.5
23	Dox1Day5	smooth/plexi	0.5	0.5
23	Dox1Day5	smooth/plexi	0.521739	0.521739
23	Dox1Day5	smooth/plexi	0.52	0.52
23	Dox1Day5	smooth/plexi	0.52	0.52
23	Dox1Day5	smooth/plexi	0.454545	0.545455
23	Dox1Day5	smooth/plexi	0.521739	0.521739
23	Dox1Day5	smooth/plexi	0.583333	0.583333
24	Dox1Day5	smooth/plexi	0.483871	0.516129
24	Dox1Day5	smooth/plexi	0.484848	0.515152
24	Dox1Day5	smooth/plexi	0.464286	0.535714
24	Dox1Day5	smooth/plexi	0.459459	0.540541
24	Dox1Day5	smooth/plexi	0.52	0.52
24	Dox1Day5	smooth/plexi	0.517241	0.517241
24	Dox1Day5	smooth/plexi	0.416667	0.583333
24	Dox1Day5	smooth/plexi	0.461538	0.538462
24	Dox1Day5	smooth/plexi	0.444444	0.555556
24	Dox1Day5	smooth/plexi	0.571429	0.571429
24	Dox1Day5	smooth/plexi	0.5	0.5
24	Dox1Day5	smooth/plexi	0.548387	0.548387
17	Dox1Day5	coated/Syl	0.481481	0.518519
17	Dox1Day5	coated/Syl	0.541667	0.541667
17	Dox1Day5	coated/Syl	0.5	0.5
17	Dox1Day5	coated/Syl	0.482759	0.517241
17	Dox1Day5	coated/Syl	0.481481	0.518519
17	Dox1Day5	coated/Syl	0.384615	0.615385
17	Dox1Day5	coated/Syl	0.52	0.52
17	Dox1Day5	coated/Syl	0.548387	0.548387
17	Dox1Day5	coated/Syl	0.517241	0.517241
17	Dox1Day5	coated/Syl	0.518519	0.518519
17	Dox1Day5	coated/Syl	0.411765	0.588235
17	Dox1Day5	coated/Syl	0.416667	0.583333
18	Dox1Day5	coated/Syl	0.565217	0.565217
18	Dox1Day5	coated/Syl	0.666667	0.666667
18	Dox1Day5	coated/Syl	0.565217	0.565217
18	Dox1Day5	coated/Syl	0.538462	0.538462
18	Dox1Day5	coated/Syl	0.608696	0.608696
18	Dox1Day5	coated/Syl	0.555556	0.555556
18	Dox1Day5	coated/Syl	0.576923	0.576923
18	Dox1Day5	coated/Syl	0.52381	0.52381
18	Dox1Day5	coated/Syl	0.947368	0.947368
18	Dox1Day5	coated/Syl	0.9	0.9
18	Dox1Day5	coated/Syl	0.6	0.6
18	Dox1Day5	coated/Syl	0.571429	0.571429
19	Dox1Day5	coated/Syl	0.481481	0.518519
19	Dox1Day5	coated/Syl	0.5	0.5
19	Dox1Day5	coated/Syl	0.517241	0.517241
19	Dox1Day5	coated/Syl	0.615385	0.615385
19	Dox1Day5	coated/Syl	0.538462	0.538462
19	Dox1Day5	coated/Syl	0.472222	0.527778
19	Dox1Day5	coated/Syl	0.529412	0.529412
19	Dox1Day5	coated/Syl	0.575758	0.575758
19	Dox1Day5	coated/Syl	0.535714	0.535714
19	Dox1Day5	coated/Syl	0.514286	0.514286
19	Dox1Day5	coated/Syl	0.586207	0.586207
20	Dox1Day5	coated/Syl	0.85	0.85
20	Dox1Day5	coated/Syl	0.1	0.9
20	Dox1Day5	coated/Syl	0.15	0.85
20	Dox1Day5	coated/Syl	0.52381	0.52381
20	Dox1Day5	coated/Syl	0.6	0.6
20	Dox1Day5	coated/Syl	0.566667	0.566667
20	Dox1Day5	coated/Syl	0.512821	0.512821
20	Dox1Day5	coated/Syl	0.821429	0.821429
20	Dox1Day5	coated/Syl	0.8	0.8
20	Dox1Day5	coated/Syl	0.85	0.85
21	Dox1Day5	coated/Syl	0.538462	0.538462
21	Dox1Day5	coated/Syl	0.514286	0.514286
21	Dox1Day5	coated/Syl	0.428571	0.571429
21	Dox1Day5	coated/Syl	0.466667	0.533333
21	Dox1Day5	coated/Syl	0.580645	0.580645
21	Dox1Day5	coated/Syl	0.5	0.5
21	Dox1Day5	coated/Syl	0.541667	0.541667
21	Dox1Day5	coated/Syl	0.5	0.5
21	Dox1Day5	coated/Syl	0.461538	0.538462
21	Dox1Day5	coated/Syl	0.583333	0.583333
21	Dox1Day5	coated/Syl	0.608696	0.608696
21	Dox1Day5	coated/Syl	0.55	0.55
22	Dox1Day5	coated/Syl	0.45	0.55
22	Dox1Day5	coated/Syl	0.45	0.55
22	Dox1Day5	coated/Syl	0.8	0.8
22	Dox1Day5	coated/Syl	1	1
22	Dox1Day5	coated/Syl	0.315789	0.684211
22	Dox1Day5	coated/Syl	0.695652	0.695652
22	Dox1Day5	coated/Syl	0.6	0.6
22	Dox1Day5	coated/Syl	0.653846	0.653846
22	Dox1Day5	coated/Syl	0.612903	0.612903
22	Dox1Day5	coated/Syl	0.842105	0.842105
22	Dox1Day5	coated/Syl	0.857143	0.857143
23	Dox1Day5	coated/Syl	0.888889	0.888889
23	Dox1Day5	coated/Syl	0.842105	0.842105
23	Dox1Day5	coated/Syl	0.777778	0.777778
23	Dox1Day5	coated/Syl	0.75	0.75
23	Dox1Day5	coated/Syl	0.85	0.85
23	Dox1Day5	coated/Syl	0.470588	0.529412
23	Dox1Day5	coated/Syl	0.545455	0.545455
23	Dox1Day5	coated/Syl	0.571429	0.571429
23	Dox1Day5	coated/Syl	0.6	0.6
23	Dox1Day5	coated/Syl	0.888889	0.888889
24	Dox1Day5	coated/Syl	0.4	0.6
24	Dox1Day5	coated/Syl	0.517241	0.517241
24	Dox1Day5	coated/Syl	0.5	0.5
24	Dox1Day5	coated/Syl	0.565217	0.565217
24	Dox1Day5	coated/Syl	0.48	0.52
24	Dox1Day5	coated/Syl	0.541667	0.541667
24	Dox1Day5	coated/Syl	0.423077	0.576923
24	Dox1Day5	coated/Syl	0.272727	0.727273
24	Dox1Day5	coated/Syl	0.444444	0.555556
24	Dox1Day5	coated/Syl	0.5	0.5
24	Dox1Day5	coated/Syl	0.454545	0.545455
17	Dox1Day8	smooth/plexi	0.466667	0.533333
17	Dox1Day8	smooth/plexi	0.5	0.5
17	Dox1Day8	smooth/plexi	0.461538	0.538462
17	Dox1Day8	smooth/plexi	0.517241	0.517241
17	Dox1Day8	smooth/plexi	0.52	0.52
17	Dox1Day8	smooth/plexi	0.5	0.5
17	Dox1Day8	smooth/plexi	0.423077	0.576923
17	Dox1Day8	smooth/plexi	0.433333	0.566667
17	Dox1Day8	smooth/plexi	0.393939	0.606061
17	Dox1Day8	smooth/plexi	0.483871	0.516129
17	Dox1Day8	smooth/plexi	0.413793	0.586207
17	Dox1Day8	smooth/plexi	0.382353	0.617647
18	Dox1Day8	smooth/plexi	0.448276	0.551724
18	Dox1Day8	smooth/plexi	0.571429	0.571429
18	Dox1Day8	smooth/plexi	0.5	0.5
18	Dox1Day8	smooth/plexi	0.478261	0.521739
18	Dox1Day8	smooth/plexi	0.482759	0.517241
18	Dox1Day8	smooth/plexi	0.5	0.5
18	Dox1Day8	smooth/plexi	0.5	0.5
18	Dox1Day8	smooth/plexi	0.607143	0.607143
18	Dox1Day8	smooth/plexi	0.576923	0.576923
19	Dox1Day8	smooth/plexi	0.586207	0.586207
19	Dox1Day8	smooth/plexi	0.5625	0.5625
19	Dox1Day8	smooth/plexi	0.586207	0.586207
19	Dox1Day8	smooth/plexi	0.72	0.72
19	Dox1Day8	smooth/plexi	0.535714	0.535714
19	Dox1Day8	smooth/plexi	0.535714	0.535714
19	Dox1Day8	smooth/plexi	0.517241	0.517241
19	Dox1Day8	smooth/plexi	0.576923	0.576923
19	Dox1Day8	smooth/plexi	0.533333	0.533333
19	Dox1Day8	smooth/plexi	0.533333	0.533333
19	Dox1Day8	smooth/plexi	0.483871	0.516129
20	Dox1Day8	smooth/plexi	0.4	0.6
20	Dox1Day8	smooth/plexi	0.5	0.5
20	Dox1Day8	smooth/plexi	0.607143	0.607143
20	Dox1Day8	smooth/plexi	0.5	0.5
20	Dox1Day8	smooth/plexi	0.5	0.5
20	Dox1Day8	smooth/plexi	0.46875	0.53125
20	Dox1Day8	smooth/plexi	0.304348	0.695652
20	Dox1Day8	smooth/plexi	0.533333	0.533333
20	Dox1Day8	smooth/plexi	0.434783	0.565217
20	Dox1Day8	smooth/plexi	0.634146	0.634146
20	Dox1Day8	smooth/plexi	0.5	0.5
21	Dox1Day8	smooth/plexi	0.448276	0.551724
21	Dox1Day8	smooth/plexi	0.454545	0.545455
21	Dox1Day8	smooth/plexi	0.36	0.64
21	Dox1Day8	smooth/plexi	0.5	0.5
21	Dox1Day8	smooth/plexi	0.407407	0.592593
21	Dox1Day8	smooth/plexi	0.5	0.5
21	Dox1Day8	smooth/plexi	0.464286	0.535714
21	Dox1Day8	smooth/plexi	0.615385	0.615385
21	Dox1Day8	smooth/plexi	0.48	0.52
22	Dox1Day8	smooth/plexi	0.481481	0.518519
22	Dox1Day8	smooth/plexi	0.458333	0.541667
22	Dox1Day8	smooth/plexi	0.52	0.52
22	Dox1Day8	smooth/plexi	0.625	0.625
22	Dox1Day8	smooth/plexi	0.576923	0.576923
22	Dox1Day8	smooth/plexi	0.428571	0.571429
22	Dox1Day8	smooth/plexi	0.466667	0.533333
22	Dox1Day8	smooth/plexi	0.607143	0.607143
22	Dox1Day8	smooth/plexi	0.59375	0.59375
22	Dox1Day8	smooth/plexi	0.551724	0.551724
23	Dox1Day8	smooth/plexi	0.56	0.56
23	Dox1Day8	smooth/plexi	0.48	0.52
23	Dox1Day8	smooth/plexi	0.454545	0.545455
23	Dox1Day8	smooth/plexi	0.555556	0.555556
23	Dox1Day8	smooth/plexi	0.615385	0.615385
23	Dox1Day8	smooth/plexi	0.466667	0.533333
23	Dox1Day8	smooth/plexi	0.517241	0.517241
23	Dox1Day8	smooth/plexi	0.576923	0.576923
23	Dox1Day8	smooth/plexi	0.5	0.5
23	Dox1Day8	smooth/plexi	0.461538	0.538462
24	Dox1Day8	smooth/plexi	0.454545	0.545455
24	Dox1Day8	smooth/plexi	0.419355	0.580645
24	Dox1Day8	smooth/plexi	0.5	0.5
24	Dox1Day8	smooth/plexi	0.5	0.5
24	Dox1Day8	smooth/plexi	0.52	0.52
24	Dox1Day8	smooth/plexi	0.444444	0.555556
24	Dox1Day8	smooth/plexi	0.461538	0.538462
24	Dox1Day8	smooth/plexi	0.482759	0.517241
24	Dox1Day8	smooth/plexi	0.466667	0.533333
24	Dox1Day8	smooth/plexi	0.466667	0.533333
24	Dox1Day8	smooth/plexi	0.481481	0.518519
24	Dox1Day8	smooth/plexi	0.535714	0.535714
17	Dox1Day8	coated/Syl	0.590909	0.590909
17	Dox1Day8	coated/Syl	0.727273	0.727273
17	Dox1Day8	coated/Syl	0.565217	0.565217
17	Dox1Day8	coated/Syl	0.708333	0.708333
17	Dox1Day8	coated/Syl	0.590909	0.590909
17	Dox1Day8	coated/Syl	0.277778	0.722222
17	Dox1Day8	coated/Syl	0.444444	0.555556
17	Dox1Day8	coated/Syl	0.636364	0.636364
17	Dox1Day8	coated/Syl	0.666667	0.666667
17	Dox1Day8	coated/Syl	0.681818	0.681818
18	Dox1Day8	coated/Syl	0.9	0.9
18	Dox1Day8	coated/Syl	0.761905	0.761905
18	Dox1Day8	coated/Syl	0.761905	0.761905
18	Dox1Day8	coated/Syl	0.2	0.8
18	Dox1Day8	coated/Syl	0.304348	0.695652
18	Dox1Day8	coated/Syl	0.944444	0.944444
18	Dox1Day8	coated/Syl	0.238095	0.761905
18	Dox1Day8	coated/Syl	0.576923	0.576923
18	Dox1Day8	coated/Syl	0.541667	0.541667
19	Dox1Day8	coated/Syl	0.4	0.6
19	Dox1Day8	coated/Syl	0.458333	0.541667
19	Dox1Day8	coated/Syl	0.541667	0.541667
19	Dox1Day8	coated/Syl	0.5	0.5
19	Dox1Day8	coated/Syl	0.53125	0.53125
19	Dox1Day8	coated/Syl	0.551724	0.551724
19	Dox1Day8	coated/Syl	0.53125	0.53125
19	Dox1Day8	coated/Syl	0.571429	0.571429
19	Dox1Day8	coated/Syl	0.538462	0.538462
19	Dox1Day8	coated/Syl	0.538462	0.538462
20	Dox1Day8	coated/Syl	0.538462	0.538462
20	Dox1Day8	coated/Syl	0.166667	0.833333
20	Dox1Day8	coated/Syl	0.2	0.8
20	Dox1Day8	coated/Syl	0.272727	0.727273
20	Dox1Day8	coated/Syl	0.5	0.5
20	Dox1Day8	coated/Syl	0.347826	0.652174
20	Dox1Day8	coated/Syl	0.380952	0.619048
20	Dox1Day8	coated/Syl	0.46875	0.53125
20	Dox1Day8	coated/Syl	0.545455	0.545455
21	Dox1Day8	coated/Syl	0.6	0.6
21	Dox1Day8	coated/Syl	0.416667	0.583333
21	Dox1Day8	coated/Syl	0.652174	0.652174
21	Dox1Day8	coated/Syl	0.666667	0.666667
21	Dox1Day8	coated/Syl	0.32	0.68
21	Dox1Day8	coated/Syl	0.333333	0.666667
21	Dox1Day8	coated/Syl	0.681818	0.681818
21	Dox1Day8	coated/Syl	0.428571	0.571429
21	Dox1Day8	coated/Syl	0.580645	0.580645
21	Dox1Day8	coated/Syl	0.2	0.8
21	Dox1Day8	coated/Syl	0.37037	0.62963
22	Dox1Day8	coated/Syl	0.571429	0.571429
22	Dox1Day8	coated/Syl	0.894737	0.894737
22	Dox1Day8	coated/Syl	0.45	0.55
22	Dox1Day8	coated/Syl	0.458333	0.541667
22	Dox1Day8	coated/Syl	0.45	0.55
22	Dox1Day8	coated/Syl	0.190476	0.809524
22	Dox1Day8	coated/Syl	0.227273	0.772727
22	Dox1Day8	coated/Syl	1	1
22	Dox1Day8	coated/Syl	0.117647	0.882353
22	Dox1Day8	coated/Syl	0.157895	0.842105
22	Dox1Day8	coated/Syl	0.111111	0.888889
23	Dox1Day8	coated/Syl	0.571429	0.571429
23	Dox1Day8	coated/Syl	0.25	0.75
23	Dox1Day8	coated/Syl	0.272727	0.727273
23	Dox1Day8	coated/Syl	0.368421	0.631579
23	Dox1Day8	coated/Syl	0.95	0.95
23	Dox1Day8	coated/Syl	1	1
23	Dox1Day8	coated/Syl	0.35	0.65
23	Dox1Day8	coated/Syl	0.4	0.6
23	Dox1Day8	coated/Syl	0.380952	0.619048
23	Dox1Day8	coated/Syl	0.45	0.55
23	Dox1Day8	coated/Syl	0.4	0.6
24	Dox1Day8	coated/Syl	0.428571	0.571429
24	Dox1Day8	coated/Syl	0.52381	0.52381
24	Dox1Day8	coated/Syl	0.454545	0.545455
24	Dox1Day8	coated/Syl	0.541667	0.541667
24	Dox1Day8	coated/Syl	0.409091	0.590909
24	Dox1Day8	coated/Syl	0.454545	0.545455
24	Dox1Day8	coated/Syl	0.5	0.5
24	Dox1Day8	coated/Syl	0.521739	0.521739
24	Dox1Day8	coated/Syl	0.458333	0.541667
24	Dox1Day8	coated/Syl	0.434783	0.565217
17	DoxOff	smooth/plexi	0.472222	0.527778
17	DoxOff	smooth/plexi	0.514286	0.514286
17	DoxOff	smooth/plexi	0.473684	0.526316
17	DoxOff	smooth/plexi	0.484848	0.515152
17	DoxOff	smooth/plexi	0.518519	0.518519
17	DoxOff	smooth/plexi	0.518519	0.518519
17	DoxOff	smooth/plexi	0.375	0.625
17	DoxOff	smooth/plexi	0.428571	0.571429
17	DoxOff	smooth/plexi	0.48	0.52
17	DoxOff	smooth/plexi	0.487805	0.512195
17	DoxOff	smooth/plexi	0.454545	0.545455
18	DoxOff	smooth/plexi	0.56	0.56
18	DoxOff	smooth/plexi	0.518519	0.518519
18	DoxOff	smooth/plexi	0.545455	0.545455
18	DoxOff	smooth/plexi	0.482759	0.517241
18	DoxOff	smooth/plexi	0.5	0.5
18	DoxOff	smooth/plexi	0.583333	0.583333
18	DoxOff	smooth/plexi	0.5	0.5
18	DoxOff	smooth/plexi	0.52	0.52
18	DoxOff	smooth/plexi	0.576923	0.576923
18	DoxOff	smooth/plexi	0.6	0.6
19	DoxOff	smooth/plexi	0.538462	0.538462
19	DoxOff	smooth/plexi	0.541667	0.541667
19	DoxOff	smooth/plexi	0.515152	0.515152
19	DoxOff	smooth/plexi	0.464286	0.535714
19	DoxOff	smooth/plexi	0.551724	0.551724
19	DoxOff	smooth/plexi	0.607143	0.607143
19	DoxOff	smooth/plexi	0.567568	0.567568
19	DoxOff	smooth/plexi	0.545455	0.545455
19	DoxOff	smooth/plexi	0.454545	0.545455
19	DoxOff	smooth/plexi	0.45	0.55
20	DoxOff	smooth/plexi	0.416667	0.583333
20	DoxOff	smooth/plexi	0.518519	0.518519
20	DoxOff	smooth/plexi	0.538462	0.538462
20	DoxOff	smooth/plexi	0.5	0.5
20	DoxOff	smooth/plexi	0.527778	0.527778
20	DoxOff	smooth/plexi	0.407407	0.592593
20	DoxOff	smooth/plexi	0.470588	0.529412
20	DoxOff	smooth/plexi	0.484848	0.515152
20	DoxOff	smooth/plexi	0.516129	0.516129
20	DoxOff	smooth/plexi	0.571429	0.571429
21	DoxOff	smooth/plexi	0.6	0.6
21	DoxOff	smooth/plexi	0.393939	0.606061
21	DoxOff	smooth/plexi	0.4	0.6
21	DoxOff	smooth/plexi	0.638889	0.638889
21	DoxOff	smooth/plexi	0.4	0.6
21	DoxOff	smooth/plexi	0.535714	0.535714
21	DoxOff	smooth/plexi	0.466667	0.533333
21	DoxOff	smooth/plexi	0.296296	0.703704
21	DoxOff	smooth/plexi	0.366667	0.633333
21	DoxOff	smooth/plexi	0.459459	0.540541
21	DoxOff	smooth/plexi	0.459459	0.540541
22	DoxOff	smooth/plexi	0.541667	0.541667
22	DoxOff	smooth/plexi	0.448276	0.551724
22	DoxOff	smooth/plexi	0.485714	0.514286
22	DoxOff	smooth/plexi	0.533333	0.533333
22	DoxOff	smooth/plexi	0.5	0.5
22	DoxOff	smooth/plexi	0.555556	0.555556
22	DoxOff	smooth/plexi	0.583333	0.583333
22	DoxOff	smooth/plexi	0.59375	0.59375
22	DoxOff	smooth/plexi	0.516129	0.516129
23	DoxOff	smooth/plexi	0.565217	0.565217
23	DoxOff	smooth/plexi	0.541667	0.541667
23	DoxOff	smooth/plexi	0.5	0.5
23	DoxOff	smooth/plexi	0.52	0.52
23	DoxOff	smooth/plexi	0.56	0.56
23	DoxOff	smooth/plexi	0.538462	0.538462
23	DoxOff	smooth/plexi	0.636364	0.636364
23	DoxOff	smooth/plexi	0.515152	0.515152
23	DoxOff	smooth/plexi	0.464286	0.535714
23	DoxOff	smooth/plexi	0.619048	0.619048
24	DoxOff	smooth/plexi	0.457143	0.542857
24	DoxOff	smooth/plexi	0.441176	0.558824
24	DoxOff	smooth/plexi	0.458333	0.541667
24	DoxOff	smooth/plexi	0.482759	0.517241
24	DoxOff	smooth/plexi	0.46875	0.53125
24	DoxOff	smooth/plexi	0.512821	0.512821
24	DoxOff	smooth/plexi	0.470588	0.529412
24	DoxOff	smooth/plexi	0.464286	0.535714
24	DoxOff	smooth/plexi	0.517241	0.517241
24	DoxOff	smooth/plexi	0.481481	0.518519
24	DoxOff	smooth/plexi	0.413793	0.586207
17	DoxOff	coated/Syl	0.448276	0.551724
17	DoxOff	coated/Syl	0.46875	0.53125
17	DoxOff	coated/Syl	0.464286	0.535714
17	DoxOff	coated/Syl	0.565217	0.565217
17	DoxOff	coated/Syl	0.535714	0.535714
17	DoxOff	coated/Syl	0.517241	0.517241
17	DoxOff	coated/Syl	0.551724	0.551724
17	DoxOff	coated/Syl	0.56	0.56
17	DoxOff	coated/Syl	0.555556	0.555556
18	DoxOff	coated/Syl	0.347826	0.652174
18	DoxOff	coated/Syl	0.333333	0.666667
18	DoxOff	coated/Syl	0.565217	0.565217
18	DoxOff	coated/Syl	0.636364	0.636364
18	DoxOff	coated/Syl	0.517241	0.517241
18	DoxOff	coated/Syl	0.615385	0.615385
18	DoxOff	coated/Syl	0.6	0.6
18	DoxOff	coated/Syl	0.52	0.52
18	DoxOff	coated/Syl	0.448276	0.551724
19	DoxOff	coated/Syl	0.566667	0.566667
19	DoxOff	coated/Syl	0.46875	0.53125
19	DoxOff	coated/Syl	0.583333	0.583333
19	DoxOff	coated/Syl	0.5	0.5
19	DoxOff	coated/Syl	0.533333	0.533333
19	DoxOff	coated/Syl	0.464286	0.535714
19	DoxOff	coated/Syl	0.611111	0.611111
19	DoxOff	coated/Syl	0.566667	0.566667
19	DoxOff	coated/Syl	0.580645	0.580645
19	DoxOff	coated/Syl	0.5625	0.5625
20	DoxOff	coated/Syl	0.518519	0.518519
20	DoxOff	coated/Syl	0.481481	0.518519
20	DoxOff	coated/Syl	0.464286	0.535714
20	DoxOff	coated/Syl	0.625	0.625
20	DoxOff	coated/Syl	0.465116	0.534884
20	DoxOff	coated/Syl	0.5	0.5
20	DoxOff	coated/Syl	0.482759	0.517241
20	DoxOff	coated/Syl	0.5	0.5
20	DoxOff	coated/Syl	0.5	0.5
20	DoxOff	coated/Syl	0.52	0.52
21	DoxOff	coated/Syl	0.448276	0.551724
21	DoxOff	coated/Syl	0.458333	0.541667
21	DoxOff	coated/Syl	0.461538	0.538462
21	DoxOff	coated/Syl	0.391304	0.608696
21	DoxOff	coated/Syl	0.538462	0.538462
21	DoxOff	coated/Syl	0.52	0.52
21	DoxOff	coated/Syl	0.478261	0.521739
21	DoxOff	coated/Syl	0.409091	0.590909
22	DoxOff	coated/Syl	0.48	0.52
22	DoxOff	coated/Syl	0.5	0.5
22	DoxOff	coated/Syl	0.5	0.5
22	DoxOff	coated/Syl	0.6	0.6
22	DoxOff	coated/Syl	0.555556	0.555556
22	DoxOff	coated/Syl	0.681818	0.681818
22	DoxOff	coated/Syl	0.52	0.52
22	DoxOff	coated/Syl	0.625	0.625
22	DoxOff	coated/Syl	0.5	0.5
23	DoxOff	coated/Syl	0.545455	0.545455
23	DoxOff	coated/Syl	0.409091	0.590909
23	DoxOff	coated/Syl	0.541667	0.541667
23	DoxOff	coated/Syl	0.565217	0.565217
23	DoxOff	coated/Syl	0.464286	0.535714
23	DoxOff	coated/Syl	0.56	0.56
23	DoxOff	coated/Syl	0.608696	0.608696
23	DoxOff	coated/Syl	0.5	0.5
23	DoxOff	coated/Syl	0.615385	0.615385
23	DoxOff	coated/Syl	0.636364	0.636364
24	DoxOff	coated/Syl	0.566667	0.566667
24	DoxOff	coated/Syl	0.391304	0.608696
24	DoxOff	coated/Syl	0.461538	0.538462
24	DoxOff	coated/Syl	0.461538	0.538462
24	DoxOff	coated/Syl	0.6	0.6
24	DoxOff	coated/Syl	0.533333	0.533333
24	DoxOff	coated/Syl	0.354839	0.645161
24	DoxOff	coated/Syl	0.461538	0.538462
24	DoxOff	coated/Syl	0.451613	0.548387
24	DoxOff	coated/Syl	0.423077	0.576923

## Sheet: RHL_homolat
Animal_ID	Time_ID	Step_surface	RHL_homolat_rawPhase	RHL_homolat_transPhase
17	Baseline	smooth/plexi	0.575758	0.575758
17	Baseline	smooth/plexi	0.651163	0.651163
17	Baseline	smooth/plexi	0.62069	0.62069
17	Baseline	smooth/plexi	0.607143	0.607143
17	Baseline	smooth/plexi	0.586207	0.586207
17	Baseline	smooth/plexi	0.516129	0.516129
17	Baseline	smooth/plexi	0.482759	0.517241
17	Baseline	smooth/plexi	0.5625	0.5625
17	Baseline	smooth/plexi	0.472222	0.527778
17	Baseline	smooth/plexi	0.451613	0.548387
17	Baseline	smooth/plexi	0.5625	0.5625
17	Baseline	smooth/plexi	0.5	0.5
18	Baseline	smooth/plexi	0.567568	0.567568
18	Baseline	smooth/plexi	0.647059	0.647059
18	Baseline	smooth/plexi	0.53125	0.53125
18	Baseline	smooth/plexi	0.566667	0.566667
18	Baseline	smooth/plexi	0.552632	0.552632
18	Baseline	smooth/plexi	0.527778	0.527778
18	Baseline	smooth/plexi	0.529412	0.529412
18	Baseline	smooth/plexi	0.516129	0.516129
18	Baseline	smooth/plexi	0.589744	0.589744
18	Baseline	smooth/plexi	0.617647	0.617647
19	Baseline	smooth/plexi	0.575758	0.575758
19	Baseline	smooth/plexi	0.481481	0.518519
19	Baseline	smooth/plexi	0.625	0.625
19	Baseline	smooth/plexi	0.5625	0.5625
19	Baseline	smooth/plexi	0.533333	0.533333
19	Baseline	smooth/plexi	0.5	0.5
19	Baseline	smooth/plexi	0.529412	0.529412
19	Baseline	smooth/plexi	0.625	0.625
19	Baseline	smooth/plexi	0.636364	0.636364
19	Baseline	smooth/plexi	0.517241	0.517241
19	Baseline	smooth/plexi	0.517241	0.517241
19	Baseline	smooth/plexi	0.576923	0.576923
20	Baseline	smooth/plexi	0.685714	0.685714
20	Baseline	smooth/plexi	0.628571	0.628571
20	Baseline	smooth/plexi	0.631579	0.631579
20	Baseline	smooth/plexi	0.638889	0.638889
20	Baseline	smooth/plexi	0.676471	0.676471
20	Baseline	smooth/plexi	0.571429	0.571429
20	Baseline	smooth/plexi	0.647059	0.647059
20	Baseline	smooth/plexi	0.564103	0.564103
21	Baseline	smooth/plexi	0.513514	0.513514
21	Baseline	smooth/plexi	0.526316	0.526316
21	Baseline	smooth/plexi	0.588235	0.588235
21	Baseline	smooth/plexi	0.633333	0.633333
21	Baseline	smooth/plexi	0.517241	0.517241
21	Baseline	smooth/plexi	0.633333	0.633333
21	Baseline	smooth/plexi	0.566667	0.566667
21	Baseline	smooth/plexi	0.567568	0.567568
21	Baseline	smooth/plexi	0.59375	0.59375
21	Baseline	smooth/plexi	0.548387	0.548387
22	Baseline	smooth/plexi	0.515152	0.515152
22	Baseline	smooth/plexi	0.483871	0.516129
22	Baseline	smooth/plexi	0.575758	0.575758
22	Baseline	smooth/plexi	0.533333	0.533333
22	Baseline	smooth/plexi	0.566667	0.566667
22	Baseline	smooth/plexi	0.589744	0.589744
22	Baseline	smooth/plexi	0.516129	0.516129
22	Baseline	smooth/plexi	0.454545	0.545455
22	Baseline	smooth/plexi	0.541667	0.541667
22	Baseline	smooth/plexi	0.655172	0.655172
22	Baseline	smooth/plexi	0.517241	0.517241
22	Baseline	smooth/plexi	0.424242	0.575758
23	Baseline	smooth/plexi	0.694444	0.694444
23	Baseline	smooth/plexi	0.606061	0.606061
23	Baseline	smooth/plexi	0.571429	0.571429
23	Baseline	smooth/plexi	0.571429	0.571429
23	Baseline	smooth/plexi	0.62963	0.62963
23	Baseline	smooth/plexi	0.5625	0.5625
23	Baseline	smooth/plexi	0.514286	0.514286
23	Baseline	smooth/plexi	0.551724	0.551724
23	Baseline	smooth/plexi	0.575758	0.575758
23	Baseline	smooth/plexi	0.513514	0.513514
24	Baseline	smooth/plexi	0.585366	0.585366
24	Baseline	smooth/plexi	0.645161	0.645161
24	Baseline	smooth/plexi	0.567568	0.567568
24	Baseline	smooth/plexi	0.514286	0.514286
24	Baseline	smooth/plexi	0.575758	0.575758
24	Baseline	smooth/plexi	0.586207	0.586207
17	Baseline	coated/Syl	0.5625	0.5625
17	Baseline	coated/Syl	0.548387	0.548387
17	Baseline	coated/Syl	0.533333	0.533333
17	Baseline	coated/Syl	0.580645	0.580645
17	Baseline	coated/Syl	0.53125	0.53125
17	Baseline	coated/Syl	0.5	0.5
17	Baseline	coated/Syl	0.548387	0.548387
17	Baseline	coated/Syl	0.484848	0.515152
17	Baseline	coated/Syl	0.612903	0.612903
17	Baseline	coated/Syl	0.566667	0.566667
17	Baseline	coated/Syl	0.481481	0.518519
17	Baseline	coated/Syl	0.5	0.5
18	Baseline	coated/Syl	0.571429	0.571429
18	Baseline	coated/Syl	0.645161	0.645161
18	Baseline	coated/Syl	0.516129	0.516129
18	Baseline	coated/Syl	0.571429	0.571429
18	Baseline	coated/Syl	0.46875	0.53125
18	Baseline	coated/Syl	0.466667	0.533333
18	Baseline	coated/Syl	0.625	0.625
18	Baseline	coated/Syl	0.53125	0.53125
19	Baseline	coated/Syl	0.515152	0.515152
19	Baseline	coated/Syl	0.5	0.5
19	Baseline	coated/Syl	0.52	0.52
19	Baseline	coated/Syl	0.5	0.5
19	Baseline	coated/Syl	0.518519	0.518519
19	Baseline	coated/Syl	0.4375	0.5625
19	Baseline	coated/Syl	0.464286	0.535714
19	Baseline	coated/Syl	0.52	0.52
19	Baseline	coated/Syl	0.5	0.5
20	Baseline	coated/Syl	0.625	0.625
20	Baseline	coated/Syl	0.571429	0.571429
20	Baseline	coated/Syl	0.576923	0.576923
20	Baseline	coated/Syl	0.583333	0.583333
20	Baseline	coated/Syl	0.518519	0.518519
20	Baseline	coated/Syl	0.551724	0.551724
20	Baseline	coated/Syl	0.625	0.625
20	Baseline	coated/Syl	0.6	0.6
20	Baseline	coated/Syl	0.538462	0.538462
20	Baseline	coated/Syl	0.518519	0.518519
21	Baseline	coated/Syl	0.575	0.575
21	Baseline	coated/Syl	0.545455	0.545455
21	Baseline	coated/Syl	0.483871	0.516129
21	Baseline	coated/Syl	0.5	0.5
21	Baseline	coated/Syl	0.481481	0.518519
21	Baseline	coated/Syl	0.551724	0.551724
21	Baseline	coated/Syl	0.533333	0.533333
21	Baseline	coated/Syl	0.576923	0.576923
21	Baseline	coated/Syl	0.56	0.56
21	Baseline	coated/Syl	0.535714	0.535714
22	Baseline	coated/Syl	0.482759	0.517241
22	Baseline	coated/Syl	0.433333	0.566667
22	Baseline	coated/Syl	0.428571	0.571429
22	Baseline	coated/Syl	0.6	0.6
22	Baseline	coated/Syl	0.454545	0.545455
22	Baseline	coated/Syl	0.517241	0.517241
22	Baseline	coated/Syl	0.542857	0.542857
22	Baseline	coated/Syl	0.514286	0.514286
22	Baseline	coated/Syl	0.46875	0.53125
22	Baseline	coated/Syl	0.441176	0.558824
23	Baseline	coated/Syl	0.538462	0.538462
23	Baseline	coated/Syl	0.551724	0.551724
23	Baseline	coated/Syl	0.586207	0.586207
23	Baseline	coated/Syl	0.515152	0.515152
23	Baseline	coated/Syl	0.538462	0.538462
23	Baseline	coated/Syl	0.448276	0.551724
23	Baseline	coated/Syl	0.555556	0.555556
23	Baseline	coated/Syl	0.518519	0.518519
23	Baseline	coated/Syl	0.541667	0.541667
24	Baseline	coated/Syl	0.583333	0.583333
24	Baseline	coated/Syl	0.571429	0.571429
24	Baseline	coated/Syl	0.533333	0.533333
24	Baseline	coated/Syl	0.6	0.6
24	Baseline	coated/Syl	0.535714	0.535714
24	Baseline	coated/Syl	0.517241	0.517241
24	Baseline	coated/Syl	0.5	0.5
24	Baseline	coated/Syl	0.555556	0.555556
24	Baseline	coated/Syl	0.481481	0.518519
24	Baseline	coated/Syl	0.541667	0.541667
17	PreDox1	smooth/plexi	0.611111	0.611111
17	PreDox1	smooth/plexi	0.642857	0.642857
17	PreDox1	smooth/plexi	0.648649	0.648649
17	PreDox1	smooth/plexi	0.535714	0.535714
17	PreDox1	smooth/plexi	0.666667	0.666667
17	PreDox1	smooth/plexi	0.677419	0.677419
17	PreDox1	smooth/plexi	0.586207	0.586207
17	PreDox1	smooth/plexi	0.666667	0.666667
17	PreDox1	smooth/plexi	0.74359	0.74359
17	PreDox1	smooth/plexi	0.551724	0.551724
17	PreDox1	smooth/plexi	0.586207	0.586207
17	PreDox1	smooth/plexi	0.625	0.625
17	PreDox1	smooth/plexi	0.5	0.5
18	PreDox1	smooth/plexi	0.565217	0.565217
18	PreDox1	smooth/plexi	0.514286	0.514286
18	PreDox1	smooth/plexi	0.5625	0.5625
18	PreDox1	smooth/plexi	0.454545	0.545455
18	PreDox1	smooth/plexi	0.5	0.5
18	PreDox1	smooth/plexi	0.631579	0.631579
18	PreDox1	smooth/plexi	0.433962	0.566038
18	PreDox1	smooth/plexi	0.592593	0.592593
18	PreDox1	smooth/plexi	0.447368	0.552632
18	PreDox1	smooth/plexi	0.533333	0.533333
18	PreDox1	smooth/plexi	0.545455	0.545455
18	PreDox1	smooth/plexi	0.551724	0.551724
19	PreDox1	smooth/plexi	0.566667	0.566667
19	PreDox1	smooth/plexi	0.5625	0.5625
19	PreDox1	smooth/plexi	0.4375	0.5625
19	PreDox1	smooth/plexi	0.538462	0.538462
19	PreDox1	smooth/plexi	0.5	0.5
19	PreDox1	smooth/plexi	0.5	0.5
19	PreDox1	smooth/plexi	0.466667	0.533333
19	PreDox1	smooth/plexi	0.477273	0.522727
19	PreDox1	smooth/plexi	0.434783	0.565217
19	PreDox1	smooth/plexi	0.435897	0.564103
20	PreDox1	smooth/plexi	0.65625	0.65625
20	PreDox1	smooth/plexi	0.714286	0.714286
20	PreDox1	smooth/plexi	0.677419	0.677419
20	PreDox1	smooth/plexi	0.657143	0.657143
20	PreDox1	smooth/plexi	0.571429	0.571429
20	PreDox1	smooth/plexi	0.566667	0.566667
20	PreDox1	smooth/plexi	0.555556	0.555556
20	PreDox1	smooth/plexi	0.518519	0.518519
20	PreDox1	smooth/plexi	0.545455	0.545455
20	PreDox1	smooth/plexi	0.65	0.65
20	PreDox1	smooth/plexi	0.558824	0.558824
20	PreDox1	smooth/plexi	0.617647	0.617647
21	PreDox1	smooth/plexi	0.538462	0.538462
21	PreDox1	smooth/plexi	0.515152	0.515152
21	PreDox1	smooth/plexi	0.482759	0.517241
21	PreDox1	smooth/plexi	0.551724	0.551724
21	PreDox1	smooth/plexi	0.529412	0.529412
21	PreDox1	smooth/plexi	0.731707	0.731707
21	PreDox1	smooth/plexi	0.586207	0.586207
21	PreDox1	smooth/plexi	0.586207	0.586207
21	PreDox1	smooth/plexi	0.483871	0.516129
21	PreDox1	smooth/plexi	0.564103	0.564103
22	PreDox1	smooth/plexi	0.482759	0.517241
22	PreDox1	smooth/plexi	0.548387	0.548387
22	PreDox1	smooth/plexi	0.433333	0.566667
22	PreDox1	smooth/plexi	0.466667	0.533333
22	PreDox1	smooth/plexi	0.428571	0.571429
22	PreDox1	smooth/plexi	0.6	0.6
22	PreDox1	smooth/plexi	0.454545	0.545455
22	PreDox1	smooth/plexi	0.517241	0.517241
22	PreDox1	smooth/plexi	0.542857	0.542857
22	PreDox1	smooth/plexi	0.514286	0.514286
22	PreDox1	smooth/plexi	0.485714	0.514286
23	PreDox1	smooth/plexi	0.702703	0.702703
23	PreDox1	smooth/plexi	0.676471	0.676471
23	PreDox1	smooth/plexi	0.516129	0.516129
23	PreDox1	smooth/plexi	0.56	0.56
23	PreDox1	smooth/plexi	0.451613	0.548387
23	PreDox1	smooth/plexi	0.555556	0.555556
23	PreDox1	smooth/plexi	0.517241	0.517241
23	PreDox1	smooth/plexi	0.517241	0.517241
23	PreDox1	smooth/plexi	0.518519	0.518519
23	PreDox1	smooth/plexi	0.538462	0.538462
23	PreDox1	smooth/plexi	0.535714	0.535714
24	PreDox1	smooth/plexi	0.517241	0.517241
24	PreDox1	smooth/plexi	0.555556	0.555556
24	PreDox1	smooth/plexi	0.666667	0.666667
24	PreDox1	smooth/plexi	0.622951	0.622951
24	PreDox1	smooth/plexi	0.489796	0.510204
24	PreDox1	smooth/plexi	0.658537	0.658537
24	PreDox1	smooth/plexi	0.6	0.6
24	PreDox1	smooth/plexi	0.533333	0.533333
24	PreDox1	smooth/plexi	0.62069	0.62069
24	PreDox1	smooth/plexi	0.55814	0.55814
17	PreDox1	coated/Syl	0.538462	0.538462
17	PreDox1	coated/Syl	0.538462	0.538462
17	PreDox1	coated/Syl	0.555556	0.555556
17	PreDox1	coated/Syl	0.551724	0.551724
17	PreDox1	coated/Syl	0.521739	0.521739
17	PreDox1	coated/Syl	0.535714	0.535714
17	PreDox1	coated/Syl	0.538462	0.538462
17	PreDox1	coated/Syl	0.56	0.56
17	PreDox1	coated/Syl	0.52	0.52
17	PreDox1	coated/Syl	0.608696	0.608696
18	PreDox1	coated/Syl	0.533333	0.533333
18	PreDox1	coated/Syl	0.571429	0.571429
18	PreDox1	coated/Syl	0.518519	0.518519
18	PreDox1	coated/Syl	0.538462	0.538462
18	PreDox1	coated/Syl	0.535714	0.535714
18	PreDox1	coated/Syl	0.538462	0.538462
18	PreDox1	coated/Syl	0.5	0.5
18	PreDox1	coated/Syl	0.533333	0.533333
18	PreDox1	coated/Syl	0.517241	0.517241
18	PreDox1	coated/Syl	0.526316	0.526316
18	PreDox1	coated/Syl	0.44	0.56
19	PreDox1	coated/Syl	0.448276	0.551724
19	PreDox1	coated/Syl	0.482759	0.517241
19	PreDox1	coated/Syl	0.518519	0.518519
19	PreDox1	coated/Syl	0.483871	0.516129
19	PreDox1	coated/Syl	0.518519	0.518519
19	PreDox1	coated/Syl	0.444444	0.555556
19	PreDox1	coated/Syl	0.52	0.52
19	PreDox1	coated/Syl	0.466667	0.533333
19	PreDox1	coated/Syl	0.558824	0.558824
20	PreDox1	coated/Syl	0.576923	0.576923
20	PreDox1	coated/Syl	0.607143	0.607143
20	PreDox1	coated/Syl	0.535714	0.535714
20	PreDox1	coated/Syl	0.586207	0.586207
20	PreDox1	coated/Syl	0.5	0.5
20	PreDox1	coated/Syl	0.555556	0.555556
20	PreDox1	coated/Syl	0.548387	0.548387
20	PreDox1	coated/Syl	0.588235	0.588235
20	PreDox1	coated/Syl	0.517241	0.517241
20	PreDox1	coated/Syl	0.533333	0.533333
20	PreDox1	coated/Syl	0.5625	0.5625
20	PreDox1	coated/Syl	0.653846	0.653846
20	PreDox1	coated/Syl	0.633333	0.633333
21	PreDox1	coated/Syl	0.551724	0.551724
21	PreDox1	coated/Syl	0.548387	0.548387
21	PreDox1	coated/Syl	0.592593	0.592593
21	PreDox1	coated/Syl	0.585366	0.585366
21	PreDox1	coated/Syl	0.56	0.56
21	PreDox1	coated/Syl	0.548387	0.548387
21	PreDox1	coated/Syl	0.419355	0.580645
21	PreDox1	coated/Syl	0.56	0.56
21	PreDox1	coated/Syl	0.592593	0.592593
21	PreDox1	coated/Syl	0.5	0.5
21	PreDox1	coated/Syl	0.580645	0.580645
21	PreDox1	coated/Syl	0.517241	0.517241
22	PreDox1	coated/Syl	0.466667	0.533333
22	PreDox1	coated/Syl	0.481481	0.518519
22	PreDox1	coated/Syl	0.444444	0.555556
22	PreDox1	coated/Syl	0.444444	0.555556
22	PreDox1	coated/Syl	0.444444	0.555556
22	PreDox1	coated/Syl	0.444444	0.555556
22	PreDox1	coated/Syl	0.419355	0.580645
22	PreDox1	coated/Syl	0.419355	0.580645
22	PreDox1	coated/Syl	0.518519	0.518519
22	PreDox1	coated/Syl	0.451613	0.548387
22	PreDox1	coated/Syl	0.384615	0.615385
22	PreDox1	coated/Syl	0.44	0.56
23	PreDox1	coated/Syl	0.52	0.52
23	PreDox1	coated/Syl	0.541667	0.541667
23	PreDox1	coated/Syl	0.551724	0.551724
23	PreDox1	coated/Syl	0.578947	0.578947
23	PreDox1	coated/Syl	0.5	0.5
23	PreDox1	coated/Syl	0.56	0.56
23	PreDox1	coated/Syl	0.565217	0.565217
23	PreDox1	coated/Syl	0.52	0.52
23	PreDox1	coated/Syl	0.56	0.56
23	PreDox1	coated/Syl	0.583333	0.583333
24	PreDox1	coated/Syl	0.517241	0.517241
24	PreDox1	coated/Syl	0.555556	0.555556
24	PreDox1	coated/Syl	0.521739	0.521739
24	PreDox1	coated/Syl	0.538462	0.538462
24	PreDox1	coated/Syl	0.48	0.52
24	PreDox1	coated/Syl	0.565217	0.565217
24	PreDox1	coated/Syl	0.6	0.6
24	PreDox1	coated/Syl	0.615385	0.615385
24	PreDox1	coated/Syl	0.482759	0.517241
24	PreDox1	coated/Syl	0.571429	0.571429
17	Dox1Day5	smooth/plexi	0.607143	0.607143
17	Dox1Day5	smooth/plexi	0.571429	0.571429
17	Dox1Day5	smooth/plexi	0.533333	0.533333
17	Dox1Day5	smooth/plexi	0.551724	0.551724
17	Dox1Day5	smooth/plexi	0.517241	0.517241
17	Dox1Day5	smooth/plexi	0.555556	0.555556
17	Dox1Day5	smooth/plexi	0.580645	0.580645
17	Dox1Day5	smooth/plexi	0.516129	0.516129
17	Dox1Day5	smooth/plexi	0.513514	0.513514
17	Dox1Day5	smooth/plexi	0.516129	0.516129
17	Dox1Day5	smooth/plexi	0.548387	0.548387
17	Dox1Day5	smooth/plexi	0.5	0.5
18	Dox1Day5	smooth/plexi	0.555556	0.555556
18	Dox1Day5	smooth/plexi	0.48	0.52
18	Dox1Day5	smooth/plexi	0.518519	0.518519
18	Dox1Day5	smooth/plexi	0.541667	0.541667
18	Dox1Day5	smooth/plexi	0.545455	0.545455
18	Dox1Day5	smooth/plexi	0.541667	0.541667
18	Dox1Day5	smooth/plexi	0.56	0.56
18	Dox1Day5	smooth/plexi	0.666667	0.666667
18	Dox1Day5	smooth/plexi	0.555556	0.555556
18	Dox1Day5	smooth/plexi	0.576923	0.576923
19	Dox1Day5	smooth/plexi	0.461538	0.538462
19	Dox1Day5	smooth/plexi	0.535714	0.535714
19	Dox1Day5	smooth/plexi	0.517241	0.517241
19	Dox1Day5	smooth/plexi	0.566667	0.566667
19	Dox1Day5	smooth/plexi	0.518519	0.518519
19	Dox1Day5	smooth/plexi	0.483871	0.516129
19	Dox1Day5	smooth/plexi	0.44	0.56
19	Dox1Day5	smooth/plexi	0.464286	0.535714
19	Dox1Day5	smooth/plexi	0.466667	0.533333
19	Dox1Day5	smooth/plexi	0.466667	0.533333
20	Dox1Day5	smooth/plexi	0.565217	0.565217
20	Dox1Day5	smooth/plexi	0.517241	0.517241
20	Dox1Day5	smooth/plexi	0.55	0.55
20	Dox1Day5	smooth/plexi	0.481481	0.518519
20	Dox1Day5	smooth/plexi	0.515152	0.515152
20	Dox1Day5	smooth/plexi	0.512821	0.512821
20	Dox1Day5	smooth/plexi	0.478261	0.521739
20	Dox1Day5	smooth/plexi	0.482759	0.517241
20	Dox1Day5	smooth/plexi	0.48	0.52
20	Dox1Day5	smooth/plexi	0.5	0.5
21	Dox1Day5	smooth/plexi	0.62069	0.62069
21	Dox1Day5	smooth/plexi	0.566667	0.566667
21	Dox1Day5	smooth/plexi	0.5	0.5
21	Dox1Day5	smooth/plexi	0.538462	0.538462
21	Dox1Day5	smooth/plexi	0.483871	0.516129
21	Dox1Day5	smooth/plexi	0.464286	0.535714
21	Dox1Day5	smooth/plexi	0.538462	0.538462
21	Dox1Day5	smooth/plexi	0.53125	0.53125
21	Dox1Day5	smooth/plexi	0.566667	0.566667
21	Dox1Day5	smooth/plexi	0.5	0.5
22	Dox1Day5	smooth/plexi	0.5	0.5
22	Dox1Day5	smooth/plexi	0.541667	0.541667
22	Dox1Day5	smooth/plexi	0.48	0.52
22	Dox1Day5	smooth/plexi	0.5	0.5
22	Dox1Day5	smooth/plexi	0.464286	0.535714
22	Dox1Day5	smooth/plexi	0.5	0.5
22	Dox1Day5	smooth/plexi	0.461538	0.538462
22	Dox1Day5	smooth/plexi	0.5	0.5
22	Dox1Day5	smooth/plexi	0.448276	0.551724
22	Dox1Day5	smooth/plexi	0.5	0.5
23	Dox1Day5	smooth/plexi	0.545455	0.545455
23	Dox1Day5	smooth/plexi	0.6	0.6
23	Dox1Day5	smooth/plexi	0.565217	0.565217
23	Dox1Day5	smooth/plexi	0.56	0.56
23	Dox1Day5	smooth/plexi	0.52	0.52
23	Dox1Day5	smooth/plexi	0.545455	0.545455
23	Dox1Day5	smooth/plexi	0.521739	0.521739
23	Dox1Day5	smooth/plexi	0.541667	0.541667
24	Dox1Day5	smooth/plexi	0.548387	0.548387
24	Dox1Day5	smooth/plexi	0.484848	0.515152
24	Dox1Day5	smooth/plexi	0.642857	0.642857
24	Dox1Day5	smooth/plexi	0.459459	0.540541
24	Dox1Day5	smooth/plexi	0.52	0.52
24	Dox1Day5	smooth/plexi	0.551724	0.551724
24	Dox1Day5	smooth/plexi	0.541667	0.541667
24	Dox1Day5	smooth/plexi	0.538462	0.538462
24	Dox1Day5	smooth/plexi	0.518519	0.518519
24	Dox1Day5	smooth/plexi	0.571429	0.571429
24	Dox1Day5	smooth/plexi	0.538462	0.538462
24	Dox1Day5	smooth/plexi	0.548387	0.548387
17	Dox1Day5	coated/Syl	0.518519	0.518519
17	Dox1Day5	coated/Syl	0.541667	0.541667
17	Dox1Day5	coated/Syl	0.538462	0.538462
17	Dox1Day5	coated/Syl	0.586207	0.586207
17	Dox1Day5	coated/Syl	0.592593	0.592593
17	Dox1Day5	coated/Syl	0.5	0.5
17	Dox1Day5	coated/Syl	0.6	0.6
17	Dox1Day5	coated/Syl	0.548387	0.548387
17	Dox1Day5	coated/Syl	0.482759	0.517241
17	Dox1Day5	coated/Syl	0.555556	0.555556
17	Dox1Day5	coated/Syl	0.588235	0.588235
17	Dox1Day5	coated/Syl	0.541667	0.541667
18	Dox1Day5	coated/Syl	0.521739	0.521739
18	Dox1Day5	coated/Syl	0.541667	0.541667
18	Dox1Day5	coated/Syl	0.521739	0.521739
18	Dox1Day5	coated/Syl	0.538462	0.538462
18	Dox1Day5	coated/Syl	0.565217	0.565217
18	Dox1Day5	coated/Syl	0.555556	0.555556
18	Dox1Day5	coated/Syl	0.538462	0.538462
18	Dox1Day5	coated/Syl	0.52381	0.52381
18	Dox1Day5	coated/Syl	0.473684	0.526316
18	Dox1Day5	coated/Syl	0.5	0.5
18	Dox1Day5	coated/Syl	0.55	0.55
18	Dox1Day5	coated/Syl	0.607143	0.607143
19	Dox1Day5	coated/Syl	0.444444	0.555556
19	Dox1Day5	coated/Syl	0.458333	0.541667
19	Dox1Day5	coated/Syl	0.448276	0.551724
19	Dox1Day5	coated/Syl	0.538462	0.538462
19	Dox1Day5	coated/Syl	0.5	0.5
19	Dox1Day5	coated/Syl	0.638889	0.638889
19	Dox1Day5	coated/Syl	0.588235	0.588235
19	Dox1Day5	coated/Syl	0.727273	0.727273
19	Dox1Day5	coated/Syl	0.5	0.5
19	Dox1Day5	coated/Syl	0.428571	0.571429
19	Dox1Day5	coated/Syl	0.517241	0.517241
20	Dox1Day5	coated/Syl	0.4	0.6
20	Dox1Day5	coated/Syl	0.4	0.6
20	Dox1Day5	coated/Syl	0.55	0.55
20	Dox1Day5	coated/Syl	0.52381	0.52381
20	Dox1Day5	coated/Syl	0.7	0.7
20	Dox1Day5	coated/Syl	0.666667	0.666667
20	Dox1Day5	coated/Syl	0.410256	0.589744
20	Dox1Day5	coated/Syl	0.535714	0.535714
20	Dox1Day5	coated/Syl	0.55	0.55
20	Dox1Day5	coated/Syl	0.65	0.65
21	Dox1Day5	coated/Syl	0.641026	0.641026
21	Dox1Day5	coated/Syl	0.6	0.6
21	Dox1Day5	coated/Syl	0.514286	0.514286
21	Dox1Day5	coated/Syl	0.6	0.6
21	Dox1Day5	coated/Syl	0.645161	0.645161
21	Dox1Day5	coated/Syl	0.5625	0.5625
21	Dox1Day5	coated/Syl	0.541667	0.541667
21	Dox1Day5	coated/Syl	0.6	0.6
21	Dox1Day5	coated/Syl	0.5	0.5
21	Dox1Day5	coated/Syl	0.583333	0.583333
21	Dox1Day5	coated/Syl	0.521739	0.521739
21	Dox1Day5	coated/Syl	0.55	0.55
22	Dox1Day5	coated/Syl	0.45	0.55
22	Dox1Day5	coated/Syl	0.45	0.55
22	Dox1Day5	coated/Syl	1	1
22	Dox1Day5	coated/Syl	0.05	0.95
22	Dox1Day5	coated/Syl	0.368421	0.631579
22	Dox1Day5	coated/Syl	0.391304	0.608696
22	Dox1Day5	coated/Syl	0.5	0.5
22	Dox1Day5	coated/Syl	0.576923	0.576923
22	Dox1Day5	coated/Syl	0.612903	0.612903
22	Dox1Day5	coated/Syl	0.631579	0.631579
22	Dox1Day5	coated/Syl	0.571429	0.571429
23	Dox1Day5	coated/Syl	0.222222	0.777778
23	Dox1Day5	coated/Syl	0.157895	0.842105
23	Dox1Day5	coated/Syl	0.611111	0.611111
23	Dox1Day5	coated/Syl	0.6	0.6
23	Dox1Day5	coated/Syl	0.7	0.7
23	Dox1Day5	coated/Syl	0.529412	0.529412
23	Dox1Day5	coated/Syl	0.545455	0.545455
23	Dox1Day5	coated/Syl	0.619048	0.619048
23	Dox1Day5	coated/Syl	0.55	0.55
23	Dox1Day5	coated/Syl	0.611111	0.611111
24	Dox1Day5	coated/Syl	0.566667	0.566667
24	Dox1Day5	coated/Syl	0.482759	0.517241
24	Dox1Day5	coated/Syl	0.4375	0.5625
24	Dox1Day5	coated/Syl	0.565217	0.565217
24	Dox1Day5	coated/Syl	0.48	0.52
24	Dox1Day5	coated/Syl	0.5	0.5
24	Dox1Day5	coated/Syl	0.538462	0.538462
24	Dox1Day5	coated/Syl	0.454545	0.545455
24	Dox1Day5	coated/Syl	0.481481	0.518519
24	Dox1Day5	coated/Syl	0.461538	0.538462
24	Dox1Day5	coated/Syl	0.52	0.52
17	Dox1Day8	smooth/plexi	0.6	0.6
17	Dox1Day8	smooth/plexi	0.59375	0.59375
17	Dox1Day8	smooth/plexi	0.512821	0.512821
17	Dox1Day8	smooth/plexi	0.586207	0.586207
17	Dox1Day8	smooth/plexi	0.6	0.6
17	Dox1Day8	smooth/plexi	0.533333	0.533333
17	Dox1Day8	smooth/plexi	0.461538	0.538462
17	Dox1Day8	smooth/plexi	0.5	0.5
17	Dox1Day8	smooth/plexi	0.424242	0.575758
17	Dox1Day8	smooth/plexi	0.483871	0.516129
17	Dox1Day8	smooth/plexi	0.482759	0.517241
17	Dox1Day8	smooth/plexi	0.558824	0.558824
18	Dox1Day8	smooth/plexi	0.62069	0.62069
18	Dox1Day8	smooth/plexi	0.5	0.5
18	Dox1Day8	smooth/plexi	0.482759	0.517241
18	Dox1Day8	smooth/plexi	0.466667	0.533333
18	Dox1Day8	smooth/plexi	0.5	0.5
18	Dox1Day8	smooth/plexi	0.5	0.5
18	Dox1Day8	smooth/plexi	0.5	0.5
18	Dox1Day8	smooth/plexi	0.52381	0.52381
18	Dox1Day8	smooth/plexi	0.6	0.6
19	Dox1Day8	smooth/plexi	0.517241	0.517241
19	Dox1Day8	smooth/plexi	0.4375	0.5625
19	Dox1Day8	smooth/plexi	0.482759	0.517241
19	Dox1Day8	smooth/plexi	0.6	0.6
19	Dox1Day8	smooth/plexi	0.5	0.5
19	Dox1Day8	smooth/plexi	0.428571	0.571429
19	Dox1Day8	smooth/plexi	0.37931	0.62069
19	Dox1Day8	smooth/plexi	0.5	0.5
19	Dox1Day8	smooth/plexi	0.433333	0.566667
19	Dox1Day8	smooth/plexi	0.5	0.5
19	Dox1Day8	smooth/plexi	0.516129	0.516129
20	Dox1Day8	smooth/plexi	0.7	0.7
20	Dox1Day8	smooth/plexi	0.566667	0.566667
20	Dox1Day8	smooth/plexi	0.535714	0.535714
20	Dox1Day8	smooth/plexi	0.464286	0.535714
20	Dox1Day8	smooth/plexi	0.735294	0.735294
20	Dox1Day8	smooth/plexi	0.59375	0.59375
20	Dox1Day8	smooth/plexi	0.478261	0.521739
20	Dox1Day8	smooth/plexi	0.5	0.5
20	Dox1Day8	smooth/plexi	0.478261	0.521739
20	Dox1Day8	smooth/plexi	0.463415	0.536585
20	Dox1Day8	smooth/plexi	0.472222	0.527778
21	Dox1Day8	smooth/plexi	0.551724	0.551724
21	Dox1Day8	smooth/plexi	0.545455	0.545455
21	Dox1Day8	smooth/plexi	0.52	0.52
21	Dox1Day8	smooth/plexi	0.535714	0.535714
21	Dox1Day8	smooth/plexi	0.555556	0.555556
21	Dox1Day8	smooth/plexi	0.5	0.5
21	Dox1Day8	smooth/plexi	0.535714	0.535714
21	Dox1Day8	smooth/plexi	0.576923	0.576923
21	Dox1Day8	smooth/plexi	0.6	0.6
22	Dox1Day8	smooth/plexi	0.481481	0.518519
22	Dox1Day8	smooth/plexi	0.458333	0.541667
22	Dox1Day8	smooth/plexi	0.44	0.56
22	Dox1Day8	smooth/plexi	0.53125	0.53125
22	Dox1Day8	smooth/plexi	0.538462	0.538462
22	Dox1Day8	smooth/plexi	0.464286	0.535714
22	Dox1Day8	smooth/plexi	0.433333	0.566667
22	Dox1Day8	smooth/plexi	0.428571	0.571429
22	Dox1Day8	smooth/plexi	0.4375	0.5625
22	Dox1Day8	smooth/plexi	0.413793	0.586207
23	Dox1Day8	smooth/plexi	0.56	0.56
23	Dox1Day8	smooth/plexi	0.52	0.52
23	Dox1Day8	smooth/plexi	0.5	0.5
23	Dox1Day8	smooth/plexi	0.481481	0.518519
23	Dox1Day8	smooth/plexi	0.576923	0.576923
23	Dox1Day8	smooth/plexi	0.5	0.5
23	Dox1Day8	smooth/plexi	0.517241	0.517241
23	Dox1Day8	smooth/plexi	0.576923	0.576923
23	Dox1Day8	smooth/plexi	0.538462	0.538462
23	Dox1Day8	smooth/plexi	0.461538	0.538462
24	Dox1Day8	smooth/plexi	0.515152	0.515152
24	Dox1Day8	smooth/plexi	0.516129	0.516129
24	Dox1Day8	smooth/plexi	0.466667	0.533333
24	Dox1Day8	smooth/plexi	0.5	0.5
24	Dox1Day8	smooth/plexi	0.52	0.52
24	Dox1Day8	smooth/plexi	0.555556	0.555556
24	Dox1Day8	smooth/plexi	0.461538	0.538462
24	Dox1Day8	smooth/plexi	0.482759	0.517241
24	Dox1Day8	smooth/plexi	0.566667	0.566667
24	Dox1Day8	smooth/plexi	0.566667	0.566667
24	Dox1Day8	smooth/plexi	0.518519	0.518519
24	Dox1Day8	smooth/plexi	0.5	0.5
17	Dox1Day8	coated/Syl	0.636364	0.636364
17	Dox1Day8	coated/Syl	0.5	0.5
17	Dox1Day8	coated/Syl	0.608696	0.608696
17	Dox1Day8	coated/Syl	0.541667	0.541667
17	Dox1Day8	coated/Syl	0.590909	0.590909
17	Dox1Day8	coated/Syl	0.555556	0.555556
17	Dox1Day8	coated/Syl	0.444444	0.555556
17	Dox1Day8	coated/Syl	0.590909	0.590909
17	Dox1Day8	coated/Syl	0.619048	0.619048
17	Dox1Day8	coated/Syl	0.590909	0.590909
18	Dox1Day8	coated/Syl	0.5	0.5
18	Dox1Day8	coated/Syl	0.619048	0.619048
18	Dox1Day8	coated/Syl	0.52381	0.52381
18	Dox1Day8	coated/Syl	0.36	0.64
18	Dox1Day8	coated/Syl	0.434783	0.565217
18	Dox1Day8	coated/Syl	0.388889	0.611111
18	Dox1Day8	coated/Syl	0.380952	0.619048
18	Dox1Day8	coated/Syl	0.538462	0.538462
18	Dox1Day8	coated/Syl	0.583333	0.583333
19	Dox1Day8	coated/Syl	0.44	0.56
19	Dox1Day8	coated/Syl	0.458333	0.541667
19	Dox1Day8	coated/Syl	0.458333	0.541667
19	Dox1Day8	coated/Syl	0.40625	0.59375
19	Dox1Day8	coated/Syl	0.5	0.5
19	Dox1Day8	coated/Syl	0.517241	0.517241
19	Dox1Day8	coated/Syl	0.5	0.5
19	Dox1Day8	coated/Syl	0.5	0.5
19	Dox1Day8	coated/Syl	0.461538	0.538462
20	Dox1Day8	coated/Syl	0.461538	0.538462
20	Dox1Day8	coated/Syl	0.5	0.5
20	Dox1Day8	coated/Syl	0.388889	0.611111
20	Dox1Day8	coated/Syl	0.45	0.55
20	Dox1Day8	coated/Syl	0.363636	0.636364
20	Dox1Day8	coated/Syl	0.454545	0.545455
20	Dox1Day8	coated/Syl	0.478261	0.521739
20	Dox1Day8	coated/Syl	0.52381	0.52381
20	Dox1Day8	coated/Syl	0.5	0.5
20	Dox1Day8	coated/Syl	0.545455	0.545455
21	Dox1Day8	coated/Syl	0.56	0.56
21	Dox1Day8	coated/Syl	0.625	0.625
21	Dox1Day8	coated/Syl	0.608696	0.608696
21	Dox1Day8	coated/Syl	0.62963	0.62963
21	Dox1Day8	coated/Syl	0.56	0.56
21	Dox1Day8	coated/Syl	0.518519	0.518519
21	Dox1Day8	coated/Syl	0.545455	0.545455
21	Dox1Day8	coated/Syl	0.535714	0.535714
21	Dox1Day8	coated/Syl	0.548387	0.548387
21	Dox1Day8	coated/Syl	0.5	0.5
21	Dox1Day8	coated/Syl	0.518519	0.518519
22	Dox1Day8	coated/Syl	0.52381	0.52381
22	Dox1Day8	coated/Syl	0.8	0.8
22	Dox1Day8	coated/Syl	0.45	0.55
22	Dox1Day8	coated/Syl	0.458333	0.541667
22	Dox1Day8	coated/Syl	0.45	0.55
22	Dox1Day8	coated/Syl	0.333333	0.666667
22	Dox1Day8	coated/Syl	0.454545	0.545455
22	Dox1Day8	coated/Syl	0.352941	0.647059
22	Dox1Day8	coated/Syl	0.521739	0.521739
22	Dox1Day8	coated/Syl	0.263158	0.736842
22	Dox1Day8	coated/Syl	0.333333	0.666667
23	Dox1Day8	coated/Syl	0.571429	0.571429
23	Dox1Day8	coated/Syl	0.4375	0.5625
23	Dox1Day8	coated/Syl	0.5	0.5
23	Dox1Day8	coated/Syl	0.555556	0.555556
23	Dox1Day8	coated/Syl	0.55	0.55
23	Dox1Day8	coated/Syl	0.833333	0.833333
23	Dox1Day8	coated/Syl	0.5	0.5
23	Dox1Day8	coated/Syl	0.55	0.55
23	Dox1Day8	coated/Syl	0.52381	0.52381
23	Dox1Day8	coated/Syl	0.5	0.5
24	Dox1Day8	coated/Syl	0.5	0.5
24	Dox1Day8	coated/Syl	0.47619	0.52381
24	Dox1Day8	coated/Syl	0.52381	0.52381
24	Dox1Day8	coated/Syl	0.545455	0.545455
24	Dox1Day8	coated/Syl	0.541667	0.541667
24	Dox1Day8	coated/Syl	0.5	0.5
24	Dox1Day8	coated/Syl	0.545455	0.545455
24	Dox1Day8	coated/Syl	0.545455	0.545455
24	Dox1Day8	coated/Syl	0.565217	0.565217
24	Dox1Day8	coated/Syl	0.5	0.5
24	Dox1Day8	coated/Syl	0.521739	0.521739
17	DoxOff	smooth/plexi	0.638889	0.638889
17	DoxOff	smooth/plexi	0.571429	0.571429
17	DoxOff	smooth/plexi	0.605263	0.605263
17	DoxOff	smooth/plexi	0.575758	0.575758
17	DoxOff	smooth/plexi	0.518519	0.518519
17	DoxOff	smooth/plexi	0.592593	0.592593
17	DoxOff	smooth/plexi	0.541667	0.541667
17	DoxOff	smooth/plexi	0.485714	0.514286
17	DoxOff	smooth/plexi	0.56	0.56
17	DoxOff	smooth/plexi	0.682927	0.682927
17	DoxOff	smooth/plexi	0.606061	0.606061
18	DoxOff	smooth/plexi	0.52	0.52
18	DoxOff	smooth/plexi	0.481481	0.518519
18	DoxOff	smooth/plexi	0.590909	0.590909
18	DoxOff	smooth/plexi	0.551724	0.551724
18	DoxOff	smooth/plexi	0.583333	0.583333
18	DoxOff	smooth/plexi	0.541667	0.541667
18	DoxOff	smooth/plexi	0.538462	0.538462
18	DoxOff	smooth/plexi	0.52	0.52
18	DoxOff	smooth/plexi	0.538462	0.538462
18	DoxOff	smooth/plexi	0.6	0.6
19	DoxOff	smooth/plexi	0.461538	0.538462
19	DoxOff	smooth/plexi	0.458333	0.541667
19	DoxOff	smooth/plexi	0.5	0.5
19	DoxOff	smooth/plexi	0.69697	0.69697
19	DoxOff	smooth/plexi	0.535714	0.535714
19	DoxOff	smooth/plexi	0.517241	0.517241
19	DoxOff	smooth/plexi	0.378378	0.621622
19	DoxOff	smooth/plexi	0.424242	0.575758
19	DoxOff	smooth/plexi	0.454545	0.545455
19	DoxOff	smooth/plexi	0.4	0.6
20	DoxOff	smooth/plexi	0.555556	0.555556
20	DoxOff	smooth/plexi	0.592593	0.592593
20	DoxOff	smooth/plexi	0.5	0.5
20	DoxOff	smooth/plexi	0.558824	0.558824
20	DoxOff	smooth/plexi	0.666667	0.666667
20	DoxOff	smooth/plexi	0.481481	0.518519
20	DoxOff	smooth/plexi	0.441176	0.558824
20	DoxOff	smooth/plexi	0.454545	0.545455
20	DoxOff	smooth/plexi	0.516129	0.516129
20	DoxOff	smooth/plexi	0.714286	0.714286
21	DoxOff	smooth/plexi	0.4	0.6
21	DoxOff	smooth/plexi	0.393939	0.606061
21	DoxOff	smooth/plexi	0.566667	0.566667
21	DoxOff	smooth/plexi	0.611111	0.611111
21	DoxOff	smooth/plexi	0.52	0.52
21	DoxOff	smooth/plexi	0.535714	0.535714
21	DoxOff	smooth/plexi	0.533333	0.533333
21	DoxOff	smooth/plexi	0.518519	0.518519
21	DoxOff	smooth/plexi	0.6	0.6
21	DoxOff	smooth/plexi	0.405405	0.594595
21	DoxOff	smooth/plexi	0.486486	0.513514
22	DoxOff	smooth/plexi	0.458333	0.541667
22	DoxOff	smooth/plexi	0.482759	0.517241
22	DoxOff	smooth/plexi	0.457143	0.542857
22	DoxOff	smooth/plexi	0.466667	0.533333
22	DoxOff	smooth/plexi	0.458333	0.541667
22	DoxOff	smooth/plexi	0.481481	0.518519
22	DoxOff	smooth/plexi	0.541667	0.541667
22	DoxOff	smooth/plexi	0.5	0.5
22	DoxOff	smooth/plexi	0.483871	0.516129
23	DoxOff	smooth/plexi	0.521739	0.521739
23	DoxOff	smooth/plexi	0.625	0.625
23	DoxOff	smooth/plexi	0.541667	0.541667
23	DoxOff	smooth/plexi	0.52	0.52
23	DoxOff	smooth/plexi	0.56	0.56
23	DoxOff	smooth/plexi	0.5	0.5
23	DoxOff	smooth/plexi	0.590909	0.590909
23	DoxOff	smooth/plexi	0.454545	0.545455
23	DoxOff	smooth/plexi	0.5	0.5
23	DoxOff	smooth/plexi	0.52381	0.52381
24	DoxOff	smooth/plexi	0.571429	0.571429
24	DoxOff	smooth/plexi	0.529412	0.529412
24	DoxOff	smooth/plexi	0.5	0.5
24	DoxOff	smooth/plexi	0.517241	0.517241
24	DoxOff	smooth/plexi	0.53125	0.53125
24	DoxOff	smooth/plexi	0.589744	0.589744
24	DoxOff	smooth/plexi	0.529412	0.529412
24	DoxOff	smooth/plexi	0.5	0.5
24	DoxOff	smooth/plexi	0.62069	0.62069
24	DoxOff	smooth/plexi	0.444444	0.555556
24	DoxOff	smooth/plexi	0.586207	0.586207
17	DoxOff	coated/Syl	0.655172	0.655172
17	DoxOff	coated/Syl	0.5	0.5
17	DoxOff	coated/Syl	0.5	0.5
17	DoxOff	coated/Syl	0.565217	0.565217
17	DoxOff	coated/Syl	0.535714	0.535714
17	DoxOff	coated/Syl	0.482759	0.517241
17	DoxOff	coated/Syl	0.517241	0.517241
17	DoxOff	coated/Syl	0.56	0.56
17	DoxOff	coated/Syl	0.518519	0.518519
18	DoxOff	coated/Syl	0.478261	0.521739
18	DoxOff	coated/Syl	0.481481	0.518519
18	DoxOff	coated/Syl	0.565217	0.565217
18	DoxOff	coated/Syl	0.636364	0.636364
18	DoxOff	coated/Syl	0.586207	0.586207
18	DoxOff	coated/Syl	0.576923	0.576923
18	DoxOff	coated/Syl	0.56	0.56
18	DoxOff	coated/Syl	0.48	0.52
18	DoxOff	coated/Syl	0.482759	0.517241
19	DoxOff	coated/Syl	0.633333	0.633333
19	DoxOff	coated/Syl	0.625	0.625
19	DoxOff	coated/Syl	0.5	0.5
19	DoxOff	coated/Syl	0.5	0.5
19	DoxOff	coated/Syl	0.566667	0.566667
19	DoxOff	coated/Syl	0.5	0.5
19	DoxOff	coated/Syl	0.466667	0.533333
19	DoxOff	coated/Syl	0.576923	0.576923
19	DoxOff	coated/Syl	0.451613	0.548387
19	DoxOff	coated/Syl	0.46875	0.53125
20	DoxOff	coated/Syl	0.518519	0.518519
20	DoxOff	coated/Syl	0.555556	0.555556
20	DoxOff	coated/Syl	0.5	0.5
20	DoxOff	coated/Syl	0.6875	0.6875
20	DoxOff	coated/Syl	0.465116	0.534884
20	DoxOff	coated/Syl	0.423077	0.576923
20	DoxOff	coated/Syl	0.517241	0.517241
20	DoxOff	coated/Syl	0.527778	0.527778
20	DoxOff	coated/Syl	0.5	0.5
20	DoxOff	coated/Syl	0.52	0.52
21	DoxOff	coated/Syl	0.551724	0.551724
21	DoxOff	coated/Syl	0.5	0.5
21	DoxOff	coated/Syl	0.538462	0.538462
21	DoxOff	coated/Syl	0.478261	0.521739
21	DoxOff	coated/Syl	0.538462	0.538462
21	DoxOff	coated/Syl	0.52	0.52
21	DoxOff	coated/Syl	0.478261	0.521739
21	DoxOff	coated/Syl	0.454545	0.545455
22	DoxOff	coated/Syl	0.44	0.56
22	DoxOff	coated/Syl	0.461538	0.538462
22	DoxOff	coated/Syl	0.461538	0.538462
22	DoxOff	coated/Syl	0.52	0.52
22	DoxOff	coated/Syl	0.444444	0.555556
22	DoxOff	coated/Syl	0.5	0.5
22	DoxOff	coated/Syl	0.48	0.52
22	DoxOff	coated/Syl	0.5	0.5
22	DoxOff	coated/Syl	0.5	0.5
23	DoxOff	coated/Syl	0.590909	0.590909
23	DoxOff	coated/Syl	0.5	0.5
23	DoxOff	coated/Syl	0.5	0.5
23	DoxOff	coated/Syl	0.608696	0.608696
23	DoxOff	coated/Syl	0.464286	0.535714
23	DoxOff	coated/Syl	0.52	0.52
23	DoxOff	coated/Syl	0.521739	0.521739
23	DoxOff	coated/Syl	0.590909	0.590909
23	DoxOff	coated/Syl	0.461538	0.538462
23	DoxOff	coated/Syl	0.590909	0.590909
24	DoxOff	coated/Syl	0.5	0.5
24	DoxOff	coated/Syl	0.521739	0.521739
24	DoxOff	coated/Syl	0.5	0.5
24	DoxOff	coated/Syl	0.461538	0.538462
24	DoxOff	coated/Syl	0.52	0.52
24	DoxOff	coated/Syl	0.6	0.6
24	DoxOff	coated/Syl	0.451613	0.548387
24	DoxOff	coated/Syl	0.538462	0.538462
24	DoxOff	coated/Syl	0.419355	0.580645
24	DoxOff	coated/Syl	0.538462	0.538462

## Sheet: RHL_heterolat
Animal_ID	Time_ID	Step_surface	RHL_heterolat_rawPhase	RHL_heterolat_transPhase
17	Baseline	smooth/plexi	0.030303	0.030303
17	Baseline	smooth/plexi	0.0930233	0.0930233
17	Baseline	smooth/plexi	0.0689655	0.0689655
17	Baseline	smooth/plexi	0.107143	0.107143
17	Baseline	smooth/plexi	0.103448	0.103448
17	Baseline	smooth/plexi	1	0
17	Baseline	smooth/plexi	0.0322581	0.0322581
17	Baseline	smooth/plexi	1	0
17	Baseline	smooth/plexi	1	0
17	Baseline	smooth/plexi	1	0
17	Baseline	smooth/plexi	1	0
17	Baseline	smooth/plexi	1	0
18	Baseline	smooth/plexi	0.108108	0.108108
18	Baseline	smooth/plexi	0.0588235	0.0588235
18	Baseline	smooth/plexi	1	0
18	Baseline	smooth/plexi	0.0625	0.0625
18	Baseline	smooth/plexi	1	0
18	Baseline	smooth/plexi	0.0789474	0.0789474
18	Baseline	smooth/plexi	0.0833333	0.0833333
18	Baseline	smooth/plexi	0.0294118	0.0294118
18	Baseline	smooth/plexi	0.16129	0.16129
18	Baseline	smooth/plexi	0.128205	0.128205
19	Baseline	smooth/plexi	1	0
19	Baseline	smooth/plexi	0.0909091	0.0909091
19	Baseline	smooth/plexi	0.125	0.125
19	Baseline	smooth/plexi	1	0
19	Baseline	smooth/plexi	0.0333333	0.0333333
19	Baseline	smooth/plexi	0.0333333	0.0333333
19	Baseline	smooth/plexi	0.941176	0.0588235
19	Baseline	smooth/plexi	0.0882353	0.0882353
19	Baseline	smooth/plexi	1	0
19	Baseline	smooth/plexi	1	0
19	Baseline	smooth/plexi	1	0
19	Baseline	smooth/plexi	0.103448	0.103448
20	Baseline	smooth/plexi	1	0
20	Baseline	smooth/plexi	0.0857143	0.0857143
20	Baseline	smooth/plexi	0.0789474	0.0789474
20	Baseline	smooth/plexi	0.138889	0.138889
20	Baseline	smooth/plexi	0.0588235	0.0588235
20	Baseline	smooth/plexi	0.0857143	0.0857143
20	Baseline	smooth/plexi	0.0588235	0.0588235
20	Baseline	smooth/plexi	0.102564	0.102564
21	Baseline	smooth/plexi	1	0
21	Baseline	smooth/plexi	1	0
21	Baseline	smooth/plexi	0.0882353	0.0882353
21	Baseline	smooth/plexi	0.133333	0.133333
21	Baseline	smooth/plexi	1	0
21	Baseline	smooth/plexi	0.133333	0.133333
21	Baseline	smooth/plexi	1	0
21	Baseline	smooth/plexi	0.0294118	0.0294118
21	Baseline	smooth/plexi	0.121212	0.121212
21	Baseline	smooth/plexi	0.0810811	0.0810811
22	Baseline	smooth/plexi	1	0
22	Baseline	smooth/plexi	0.030303	0.030303
22	Baseline	smooth/plexi	1	0
22	Baseline	smooth/plexi	0.030303	0.030303
22	Baseline	smooth/plexi	0.0666667	0.0666667
22	Baseline	smooth/plexi	0.179487	0.179487
22	Baseline	smooth/plexi	1	0
22	Baseline	smooth/plexi	0.0606061	0.0606061
22	Baseline	smooth/plexi	1	0
22	Baseline	smooth/plexi	1	0
22	Baseline	smooth/plexi	0.0344828	0.0344828
22	Baseline	smooth/plexi	0.0344828	0.0344828
23	Baseline	smooth/plexi	0.0833333	0.0833333
23	Baseline	smooth/plexi	0.151515	0.151515
23	Baseline	smooth/plexi	0.0571429	0.0571429
23	Baseline	smooth/plexi	0.114286	0.114286
23	Baseline	smooth/plexi	1	0
23	Baseline	smooth/plexi	0.96875	0.03125
23	Baseline	smooth/plexi	0.971429	0.0285714
23	Baseline	smooth/plexi	0.0857143	0.0857143
23	Baseline	smooth/plexi	1	0
23	Baseline	smooth/plexi	0.030303	0.030303
24	Baseline	smooth/plexi	1	0
24	Baseline	smooth/plexi	0.0322581	0.0322581
24	Baseline	smooth/plexi	0.135135	0.135135
24	Baseline	smooth/plexi	1	0
24	Baseline	smooth/plexi	1	0
24	Baseline	smooth/plexi	0.151515	0.151515
17	Baseline	coated/Syl	1	0
17	Baseline	coated/Syl	0.0625	0.0625
17	Baseline	coated/Syl	0.966667	0.0333333
17	Baseline	coated/Syl	0.0666667	0.0666667
17	Baseline	coated/Syl	0.916667	0.0833333
17	Baseline	coated/Syl	0.0555556	0.0555556
17	Baseline	coated/Syl	1	0
17	Baseline	coated/Syl	0.0322581	0.0322581
17	Baseline	coated/Syl	0.0967742	0.0967742
17	Baseline	coated/Syl	0.0333333	0.0333333
17	Baseline	coated/Syl	1	0
17	Baseline	coated/Syl	0.037037	0.037037
18	Baseline	coated/Syl	0.0322581	0.0322581
18	Baseline	coated/Syl	1	0
18	Baseline	coated/Syl	0.96875	0.03125
18	Baseline	coated/Syl	0.03125	0.03125
18	Baseline	coated/Syl	0.0344828	0.0344828
18	Baseline	coated/Syl	0.933333	0.0666667
18	Baseline	coated/Syl	1	0
18	Baseline	coated/Syl	0.0416667	0.0416667
19	Baseline	coated/Syl	1	0
19	Baseline	coated/Syl	1	0
19	Baseline	coated/Syl	0.08	0.08
19	Baseline	coated/Syl	0.0740741	0.0740741
19	Baseline	coated/Syl	0.9375	0.0625
19	Baseline	coated/Syl	1	0
19	Baseline	coated/Syl	0.0714286	0.0714286
19	Baseline	coated/Syl	0.04	0.04
19	Baseline	coated/Syl	1	0
20	Baseline	coated/Syl	0.09375	0.09375
20	Baseline	coated/Syl	1	0
20	Baseline	coated/Syl	0.178571	0.178571
20	Baseline	coated/Syl	0.115385	0.115385
20	Baseline	coated/Syl	1	0
20	Baseline	coated/Syl	1	0
20	Baseline	coated/Syl	0.931034	0.0689655
20	Baseline	coated/Syl	0.0689655	0.0689655
20	Baseline	coated/Syl	0.09375	0.09375
20	Baseline	coated/Syl	0.142857	0.142857
21	Baseline	coated/Syl	0.1	0.1
21	Baseline	coated/Syl	0.0606061	0.0606061
21	Baseline	coated/Syl	1	0
21	Baseline	coated/Syl	0.966667	0.0333333
21	Baseline	coated/Syl	1	0
21	Baseline	coated/Syl	0.0740741	0.0740741
21	Baseline	coated/Syl	0.0344828	0.0344828
21	Baseline	coated/Syl	0.0769231	0.0769231
21	Baseline	coated/Syl	1	0
21	Baseline	coated/Syl	0.12	0.12
22	Baseline	coated/Syl	1	0
22	Baseline	coated/Syl	0.185185	0.185185
22	Baseline	coated/Syl	1	0
22	Baseline	coated/Syl	0.0909091	0.0909091
22	Baseline	coated/Syl	1	0
22	Baseline	coated/Syl	0.0769231	0.0769231
22	Baseline	coated/Syl	1	0
22	Baseline	coated/Syl	0.0416667	0.0416667
22	Baseline	coated/Syl	1	0
22	Baseline	coated/Syl	0.148148	0.148148
23	Baseline	coated/Syl	1	0
23	Baseline	coated/Syl	1	0
23	Baseline	coated/Syl	1	0
23	Baseline	coated/Syl	0.0344828	0.0344828
23	Baseline	coated/Syl	0.923077	0.0769231
23	Baseline	coated/Syl	0.0689655	0.0689655
23	Baseline	coated/Syl	0.111111	0.111111
23	Baseline	coated/Syl	0.111111	0.111111
23	Baseline	coated/Syl	0.208333	0.208333
24	Baseline	coated/Syl	1	0
24	Baseline	coated/Syl	0.928571	0.0714286
24	Baseline	coated/Syl	0.1	0.1
24	Baseline	coated/Syl	0.1	0.1
24	Baseline	coated/Syl	1	0
24	Baseline	coated/Syl	0.0357143	0.0357143
24	Baseline	coated/Syl	0.928571	0.0714286
24	Baseline	coated/Syl	0.962963	0.037037
24	Baseline	coated/Syl	0.962963	0.037037
24	Baseline	coated/Syl	0.0740741	0.0740741
17	PreDox1	smooth/plexi	0.0833333	0.0833333
17	PreDox1	smooth/plexi	0.0714286	0.0714286
17	PreDox1	smooth/plexi	0.0810811	0.0810811
17	PreDox1	smooth/plexi	0.964286	0.0357143
17	PreDox1	smooth/plexi	0.166667	0.166667
17	PreDox1	smooth/plexi	0.129032	0.129032
17	PreDox1	smooth/plexi	0.103448	0.103448
17	PreDox1	smooth/plexi	0.2	0.2
17	PreDox1	smooth/plexi	0.333333	0.333333
17	PreDox1	smooth/plexi	1	0
17	PreDox1	smooth/plexi	0.0344828	0.0344828
17	PreDox1	smooth/plexi	0.90625	0.09375
17	PreDox1	smooth/plexi	0.0625	0.0625
18	PreDox1	smooth/plexi	0.130435	0.130435
18	PreDox1	smooth/plexi	0.0571429	0.0571429
18	PreDox1	smooth/plexi	0.125	0.125
18	PreDox1	smooth/plexi	0.96875	0.03125
18	PreDox1	smooth/plexi	0.0625	0.0625
18	PreDox1	smooth/plexi	1	0
18	PreDox1	smooth/plexi	0.90566	0.0943396
18	PreDox1	smooth/plexi	0.113208	0.113208
18	PreDox1	smooth/plexi	0.973684	0.0263158
18	PreDox1	smooth/plexi	0.0789474	0.0789474
18	PreDox1	smooth/plexi	1	0
18	PreDox1	smooth/plexi	0.0909091	0.0909091
19	PreDox1	smooth/plexi	1	0
19	PreDox1	smooth/plexi	0.125	0.125
19	PreDox1	smooth/plexi	0.9375	0.0625
19	PreDox1	smooth/plexi	0.0625	0.0625
19	PreDox1	smooth/plexi	0.115385	0.115385
19	PreDox1	smooth/plexi	0.0666667	0.0666667
19	PreDox1	smooth/plexi	0.0357143	0.0357143
19	PreDox1	smooth/plexi	0.954545	0.0454545
19	PreDox1	smooth/plexi	1	0
19	PreDox1	smooth/plexi	0.948718	0.0512821
20	PreDox1	smooth/plexi	0.03125	0.03125
20	PreDox1	smooth/plexi	0.171429	0.171429
20	PreDox1	smooth/plexi	0.193548	0.193548
20	PreDox1	smooth/plexi	1	0
20	PreDox1	smooth/plexi	0.0857143	0.0857143
20	PreDox1	smooth/plexi	0.0857143	0.0857143
20	PreDox1	smooth/plexi	0.0666667	0.0666667
20	PreDox1	smooth/plexi	1	0
20	PreDox1	smooth/plexi	0.909091	0.0909091
20	PreDox1	smooth/plexi	0.075	0.075
20	PreDox1	smooth/plexi	1	0
20	PreDox1	smooth/plexi	0.0882353	0.0882353
21	PreDox1	smooth/plexi	1	0
21	PreDox1	smooth/plexi	0.969697	0.030303
21	PreDox1	smooth/plexi	0.965517	0.0344828
21	PreDox1	smooth/plexi	0.137931	0.137931
21	PreDox1	smooth/plexi	0.970588	0.0294118
21	PreDox1	smooth/plexi	0.0882353	0.0882353
21	PreDox1	smooth/plexi	0.170732	0.170732
21	PreDox1	smooth/plexi	0.967742	0.0322581
21	PreDox1	smooth/plexi	0.0322581	0.0322581
21	PreDox1	smooth/plexi	0.0344828	0.0344828
22	PreDox1	smooth/plexi	0.0344828	0.0344828
22	PreDox1	smooth/plexi	1	0
22	PreDox1	smooth/plexi	0.928571	0.0714286
22	PreDox1	smooth/plexi	1	0
22	PreDox1	smooth/plexi	1	0
22	PreDox1	smooth/plexi	0.0606061	0.0606061
22	PreDox1	smooth/plexi	1	0
22	PreDox1	smooth/plexi	0.0571429	0.0571429
22	PreDox1	smooth/plexi	0.96875	0.03125
22	PreDox1	smooth/plexi	0.970588	0.0294118
22	PreDox1	smooth/plexi	0.102564	0.102564
23	PreDox1	smooth/plexi	0.162162	0.162162
23	PreDox1	smooth/plexi	0.205882	0.205882
23	PreDox1	smooth/plexi	1	0
23	PreDox1	smooth/plexi	0.0967742	0.0967742
23	PreDox1	smooth/plexi	1	0
23	PreDox1	smooth/plexi	1	0
23	PreDox1	smooth/plexi	0.103448	0.103448
23	PreDox1	smooth/plexi	0.206897	0.206897
23	PreDox1	smooth/plexi	1	0
23	PreDox1	smooth/plexi	1	0
23	PreDox1	smooth/plexi	0.0714286	0.0714286
24	PreDox1	smooth/plexi	0.0344828	0.0344828
24	PreDox1	smooth/plexi	1	0
24	PreDox1	smooth/plexi	0.166667	0.166667
24	PreDox1	smooth/plexi	0.0327869	0.0327869
24	PreDox1	smooth/plexi	0.0408163	0.0408163
24	PreDox1	smooth/plexi	0.195122	0.195122
24	PreDox1	smooth/plexi	0.0666667	0.0666667
24	PreDox1	smooth/plexi	0.137931	0.137931
24	PreDox1	smooth/plexi	0.0697674	0.0697674
24	PreDox1	smooth/plexi	0.0555556	0.0555556
17	PreDox1	coated/Syl	0.923077	0.0769231
17	PreDox1	coated/Syl	1	0
17	PreDox1	coated/Syl	1	0
17	PreDox1	coated/Syl	0.965517	0.0344828
17	PreDox1	coated/Syl	1	0
17	PreDox1	coated/Syl	1	0
17	PreDox1	coated/Syl	1	0
17	PreDox1	coated/Syl	1	0
17	PreDox1	coated/Syl	1	0
17	PreDox1	coated/Syl	0.04	0.04
18	PreDox1	coated/Syl	0.0666667	0.0666667
18	PreDox1	coated/Syl	0.0714286	0.0714286
18	PreDox1	coated/Syl	1	0
18	PreDox1	coated/Syl	1	0
18	PreDox1	coated/Syl	1	0
18	PreDox1	coated/Syl	1	0
18	PreDox1	coated/Syl	0.0384615	0.0384615
18	PreDox1	coated/Syl	0.0333333	0.0333333
18	PreDox1	coated/Syl	0.103448	0.103448
18	PreDox1	coated/Syl	1	0
18	PreDox1	coated/Syl	0.84	0.16
19	PreDox1	coated/Syl	0.965517	0.0344828
19	PreDox1	coated/Syl	0.0344828	0.0344828
19	PreDox1	coated/Syl	1	0
19	PreDox1	coated/Syl	0.0322581	0.0322581
19	PreDox1	coated/Syl	0.0740741	0.0740741
19	PreDox1	coated/Syl	1	0
19	PreDox1	coated/Syl	0.037037	0.037037
19	PreDox1	coated/Syl	1	0
19	PreDox1	coated/Syl	1	0
20	PreDox1	coated/Syl	1	0
20	PreDox1	coated/Syl	1	0
20	PreDox1	coated/Syl	0.928571	0.0714286
20	PreDox1	coated/Syl	0.0357143	0.0357143
20	PreDox1	coated/Syl	0.961538	0.0384615
20	PreDox1	coated/Syl	0.0384615	0.0384615
20	PreDox1	coated/Syl	0.935484	0.0645161
20	PreDox1	coated/Syl	0.0322581	0.0322581
20	PreDox1	coated/Syl	0.931034	0.0689655
20	PreDox1	coated/Syl	1	0
20	PreDox1	coated/Syl	1	0
20	PreDox1	coated/Syl	0.09375	0.09375
20	PreDox1	coated/Syl	0.0333333	0.0333333
21	PreDox1	coated/Syl	1	0
21	PreDox1	coated/Syl	0.0967742	0.0967742
21	PreDox1	coated/Syl	1	0
21	PreDox1	coated/Syl	0.0487805	0.0487805
21	PreDox1	coated/Syl	0.935484	0.0645161
21	PreDox1	coated/Syl	0.16129	0.16129
21	PreDox1	coated/Syl	0.870968	0.129032
21	PreDox1	coated/Syl	0.96	0.04
21	PreDox1	coated/Syl	1	0
21	PreDox1	coated/Syl	0.0740741	0.0740741
21	PreDox1	coated/Syl	0.0357143	0.0357143
21	PreDox1	coated/Syl	0.0322581	0.0322581
22	PreDox1	coated/Syl	0.0333333	0.0333333
22	PreDox1	coated/Syl	0.037037	0.037037
22	PreDox1	coated/Syl	1	0
22	PreDox1	coated/Syl	0.0740741	0.0740741
22	PreDox1	coated/Syl	0.0740741	0.0740741
22	PreDox1	coated/Syl	0.037037	0.037037
22	PreDox1	coated/Syl	0.903226	0.0967742
22	PreDox1	coated/Syl	0.935484	0.0645161
22	PreDox1	coated/Syl	1	0
22	PreDox1	coated/Syl	1	0
22	PreDox1	coated/Syl	1	0
22	PreDox1	coated/Syl	1	0
23	PreDox1	coated/Syl	1	0
23	PreDox1	coated/Syl	1	0
23	PreDox1	coated/Syl	0.896552	0.103448
23	PreDox1	coated/Syl	1	0
23	PreDox1	coated/Syl	1	0
23	PreDox1	coated/Syl	0.0384615	0.0384615
23	PreDox1	coated/Syl	1	0
23	PreDox1	coated/Syl	0.0434783	0.0434783
23	PreDox1	coated/Syl	1	0
23	PreDox1	coated/Syl	0.04	0.04
24	PreDox1	coated/Syl	1	0
24	PreDox1	coated/Syl	1	0
24	PreDox1	coated/Syl	0.923077	0.0769231
24	PreDox1	coated/Syl	0.0769231	0.0769231
24	PreDox1	coated/Syl	1	0
24	PreDox1	coated/Syl	0.04	0.04
24	PreDox1	coated/Syl	1	0
24	PreDox1	coated/Syl	0.2	0.2
24	PreDox1	coated/Syl	0.965517	0.0344828
24	PreDox1	coated/Syl	1	0
17	Dox1Day5	smooth/plexi	0.0714286	0.0714286
17	Dox1Day5	smooth/plexi	0.107143	0.107143
17	Dox1Day5	smooth/plexi	0.0666667	0.0666667
17	Dox1Day5	smooth/plexi	0.0344828	0.0344828
17	Dox1Day5	smooth/plexi	1	0
17	Dox1Day5	smooth/plexi	0.0344828	0.0344828
17	Dox1Day5	smooth/plexi	1	0
17	Dox1Day5	smooth/plexi	0.0322581	0.0322581
17	Dox1Day5	smooth/plexi	0.108108	0.108108
17	Dox1Day5	smooth/plexi	0.0967742	0.0967742
17	Dox1Day5	smooth/plexi	1	0
17	Dox1Day5	smooth/plexi	0.0588235	0.0588235
18	Dox1Day5	smooth/plexi	1	0
18	Dox1Day5	smooth/plexi	0.0740741	0.0740741
18	Dox1Day5	smooth/plexi	0.148148	0.148148
18	Dox1Day5	smooth/plexi	1	0
18	Dox1Day5	smooth/plexi	0.0833333	0.0833333
18	Dox1Day5	smooth/plexi	0.125	0.125
18	Dox1Day5	smooth/plexi	1	0
18	Dox1Day5	smooth/plexi	0.12	0.12
18	Dox1Day5	smooth/plexi	1	0
18	Dox1Day5	smooth/plexi	0.0740741	0.0740741
19	Dox1Day5	smooth/plexi	1	0
19	Dox1Day5	smooth/plexi	1	0
19	Dox1Day5	smooth/plexi	1	0
19	Dox1Day5	smooth/plexi	0.0689655	0.0689655
19	Dox1Day5	smooth/plexi	1	0
19	Dox1Day5	smooth/plexi	0.967742	0.0322581
19	Dox1Day5	smooth/plexi	0.0645161	0.0645161
19	Dox1Day5	smooth/plexi	1	0
19	Dox1Day5	smooth/plexi	0.966667	0.0333333
19	Dox1Day5	smooth/plexi	1	0
20	Dox1Day5	smooth/plexi	0.931034	0.0689655
20	Dox1Day5	smooth/plexi	0.103448	0.103448
20	Dox1Day5	smooth/plexi	1	0
20	Dox1Day5	smooth/plexi	0.814815	0.185185
20	Dox1Day5	smooth/plexi	1	0
20	Dox1Day5	smooth/plexi	0.923077	0.0769231
20	Dox1Day5	smooth/plexi	0.956522	0.0434783
20	Dox1Day5	smooth/plexi	0.965517	0.0344828
20	Dox1Day5	smooth/plexi	0.96	0.04
20	Dox1Day5	smooth/plexi	0.954545	0.0454545
21	Dox1Day5	smooth/plexi	1	0
21	Dox1Day5	smooth/plexi	0.0689655	0.0689655
21	Dox1Day5	smooth/plexi	0.961538	0.0384615
21	Dox1Day5	smooth/plexi	0.1	0.1
21	Dox1Day5	smooth/plexi	1	0
21	Dox1Day5	smooth/plexi	1	0
21	Dox1Day5	smooth/plexi	0.90625	0.09375
21	Dox1Day5	smooth/plexi	0.03125	0.03125
21	Dox1Day5	smooth/plexi	0.0333333	0.0333333
21	Dox1Day5	smooth/plexi	0.0625	0.0625
22	Dox1Day5	smooth/plexi	1	0
22	Dox1Day5	smooth/plexi	0.0384615	0.0384615
22	Dox1Day5	smooth/plexi	1	0
22	Dox1Day5	smooth/plexi	0.04	0.04
22	Dox1Day5	smooth/plexi	1	0
22	Dox1Day5	smooth/plexi	0.0357143	0.0357143
22	Dox1Day5	smooth/plexi	1	0
22	Dox1Day5	smooth/plexi	1	0
22	Dox1Day5	smooth/plexi	1	0
22	Dox1Day5	smooth/plexi	1	0
23	Dox1Day5	smooth/plexi	0.0454545	0.0454545
23	Dox1Day5	smooth/plexi	1	0
23	Dox1Day5	smooth/plexi	1	0
23	Dox1Day5	smooth/plexi	1	0
23	Dox1Day5	smooth/plexi	1	0
23	Dox1Day5	smooth/plexi	1	0
23	Dox1Day5	smooth/plexi	1	0
23	Dox1Day5	smooth/plexi	0.0434783	0.0434783
24	Dox1Day5	smooth/plexi	0.967742	0.0322581
24	Dox1Day5	smooth/plexi	0.0322581	0.0322581
24	Dox1Day5	smooth/plexi	0.945946	0.0540541
24	Dox1Day5	smooth/plexi	0.162162	0.162162
24	Dox1Day5	smooth/plexi	1	0
24	Dox1Day5	smooth/plexi	1	0
24	Dox1Day5	smooth/plexi	1	0
24	Dox1Day5	smooth/plexi	1	0
24	Dox1Day5	smooth/plexi	1	0
24	Dox1Day5	smooth/plexi	0.0714286	0.0714286
24	Dox1Day5	smooth/plexi	1	0
24	Dox1Day5	smooth/plexi	1	0
17	Dox1Day5	coated/Syl	1	0
17	Dox1Day5	coated/Syl	0.037037	0.037037
17	Dox1Day5	coated/Syl	1	0
17	Dox1Day5	coated/Syl	0.0384615	0.0384615
17	Dox1Day5	coated/Syl	1	0
17	Dox1Day5	coated/Syl	0.04	0.04
17	Dox1Day5	coated/Syl	0.0967742	0.0967742
17	Dox1Day5	coated/Syl	0.931034	0.0689655
17	Dox1Day5	coated/Syl	0.0344828	0.0344828
17	Dox1Day5	coated/Syl	0.0740741	0.0740741
17	Dox1Day5	coated/Syl	0.0882353	0.0882353
17	Dox1Day5	coated/Syl	0.933333	0.0666667
18	Dox1Day5	coated/Syl	0.0869565	0.0869565
18	Dox1Day5	coated/Syl	0.208333	0.208333
18	Dox1Day5	coated/Syl	1	0
18	Dox1Day5	coated/Syl	0.130435	0.130435
18	Dox1Day5	coated/Syl	0.153846	0.153846
18	Dox1Day5	coated/Syl	0.130435	0.130435
18	Dox1Day5	coated/Syl	0.037037	0.037037
18	Dox1Day5	coated/Syl	0.115385	0.115385
18	Dox1Day5	coated/Syl	0.105263	0.105263
18	Dox1Day5	coated/Syl	0.25	0.25
18	Dox1Day5	coated/Syl	0.05	0.05
18	Dox1Day5	coated/Syl	0.178571	0.178571
19	Dox1Day5	coated/Syl	0.962963	0.037037
19	Dox1Day5	coated/Syl	1	0
19	Dox1Day5	coated/Syl	0.965517	0.0344828
19	Dox1Day5	coated/Syl	0.0689655	0.0689655
19	Dox1Day5	coated/Syl	0.961538	0.0384615
19	Dox1Day5	coated/Syl	0.0833333	0.0833333
19	Dox1Day5	coated/Syl	0.235294	0.235294
19	Dox1Day5	coated/Syl	0.030303	0.030303
19	Dox1Day5	coated/Syl	0.885714	0.114286
19	Dox1Day5	coated/Syl	0.0285714	0.0285714
19	Dox1Day5	coated/Syl	0.137931	0.137931
20	Dox1Day5	coated/Syl	0.2	0.2
20	Dox1Day5	coated/Syl	0.6	0.4
20	Dox1Day5	coated/Syl	0.75	0.25
20	Dox1Day5	coated/Syl	0.047619	0.047619
20	Dox1Day5	coated/Syl	0.2	0.2
20	Dox1Day5	coated/Syl	1	0
20	Dox1Day5	coated/Syl	0.0333333	0.0333333
20	Dox1Day5	coated/Syl	1	0
20	Dox1Day5	coated/Syl	0.3	0.3
20	Dox1Day5	coated/Syl	0.3	0.3
21	Dox1Day5	coated/Syl	0.0512821	0.0512821
21	Dox1Day5	coated/Syl	0.142857	0.142857
21	Dox1Day5	coated/Syl	1	0
21	Dox1Day5	coated/Syl	0.0571429	0.0571429
21	Dox1Day5	coated/Syl	0.129032	0.129032
21	Dox1Day5	coated/Syl	0.0625	0.0625
21	Dox1Day5	coated/Syl	0.125	0.125
21	Dox1Day5	coated/Syl	0.05	0.05
21	Dox1Day5	coated/Syl	0.961538	0.0384615
21	Dox1Day5	coated/Syl	0.0769231	0.0769231
21	Dox1Day5	coated/Syl	0.0434783	0.0434783
21	Dox1Day5	coated/Syl	0.05	0.05
22	Dox1Day5	coated/Syl	0.95	0.05
22	Dox1Day5	coated/Syl	0.9	0.1
22	Dox1Day5	coated/Syl	0.45	0.45
22	Dox1Day5	coated/Syl	0.571429	0.428571
22	Dox1Day5	coated/Syl	0.789474	0.210526
22	Dox1Day5	coated/Syl	0.0869565	0.0869565
22	Dox1Day5	coated/Syl	0.1	0.1
22	Dox1Day5	coated/Syl	0.0769231	0.0769231
22	Dox1Day5	coated/Syl	0.787879	0.212121
22	Dox1Day5	coated/Syl	0.210526	0.210526
22	Dox1Day5	coated/Syl	0.190476	0.190476
23	Dox1Day5	coated/Syl	0.5	0.5
23	Dox1Day5	coated/Syl	0.526316	0.473684
23	Dox1Day5	coated/Syl	0.166667	0.166667
23	Dox1Day5	coated/Syl	0.3	0.3
23	Dox1Day5	coated/Syl	0.35	0.35
23	Dox1Day5	coated/Syl	0.888889	0.111111
23	Dox1Day5	coated/Syl	0.954545	0.0454545
23	Dox1Day5	coated/Syl	0.0454545	0.0454545
23	Dox1Day5	coated/Syl	0.1	0.1
23	Dox1Day5	coated/Syl	0.333333	0.333333
24	Dox1Day5	coated/Syl	0.966667	0.0333333
24	Dox1Day5	coated/Syl	1	0
24	Dox1Day5	coated/Syl	0.90625	0.09375
24	Dox1Day5	coated/Syl	0.09375	0.09375
24	Dox1Day5	coated/Syl	1	0
24	Dox1Day5	coated/Syl	1	0
24	Dox1Day5	coated/Syl	0.961538	0.0384615
24	Dox1Day5	coated/Syl	0.863636	0.136364
24	Dox1Day5	coated/Syl	0.888889	0.111111
24	Dox1Day5	coated/Syl	0.961538	0.0384615
24	Dox1Day5	coated/Syl	0.96	0.04
17	Dox1Day8	smooth/plexi	0.166667	0.166667
17	Dox1Day8	smooth/plexi	0.0625	0.0625
17	Dox1Day8	smooth/plexi	0.974359	0.025641
17	Dox1Day8	smooth/plexi	0.128205	0.128205
17	Dox1Day8	smooth/plexi	0.137931	0.137931
17	Dox1Day8	smooth/plexi	1	0
17	Dox1Day8	smooth/plexi	0.961538	0.0384615
17	Dox1Day8	smooth/plexi	0.933333	0.0666667
17	Dox1Day8	smooth/plexi	0.878788	0.121212
17	Dox1Day8	smooth/plexi	0.967742	0.0322581
17	Dox1Day8	smooth/plexi	0.882353	0.117647
17	Dox1Day8	smooth/plexi	0.833333	0.166667
18	Dox1Day8	smooth/plexi	0.103448	0.103448
18	Dox1Day8	smooth/plexi	1	0
18	Dox1Day8	smooth/plexi	0.965517	0.0344828
18	Dox1Day8	smooth/plexi	0.103448	0.103448
18	Dox1Day8	smooth/plexi	1	0
18	Dox1Day8	smooth/plexi	0.0714286	0.0714286
18	Dox1Day8	smooth/plexi	0.0357143	0.0357143
18	Dox1Day8	smooth/plexi	0.047619	0.047619
18	Dox1Day8	smooth/plexi	0.08	0.08
19	Dox1Day8	smooth/plexi	1	0
19	Dox1Day8	smooth/plexi	0.09375	0.09375
19	Dox1Day8	smooth/plexi	0.172414	0.172414
19	Dox1Day8	smooth/plexi	0.2	0.2
19	Dox1Day8	smooth/plexi	0.964286	0.0357143
19	Dox1Day8	smooth/plexi	0.107143	0.107143
19	Dox1Day8	smooth/plexi	0.931034	0.0689655
19	Dox1Day8	smooth/plexi	0.0344828	0.0344828
19	Dox1Day8	smooth/plexi	1	0
19	Dox1Day8	smooth/plexi	1	0
19	Dox1Day8	smooth/plexi	0.0967742	0.0967742
20	Dox1Day8	smooth/plexi	0.1	0.1
20	Dox1Day8	smooth/plexi	0.1	0.1
20	Dox1Day8	smooth/plexi	0.0714286	0.0714286
20	Dox1Day8	smooth/plexi	0.868421	0.131579
20	Dox1Day8	smooth/plexi	0.235294	0.235294
20	Dox1Day8	smooth/plexi	0.125	0.125
20	Dox1Day8	smooth/plexi	0.826087	0.173913
20	Dox1Day8	smooth/plexi	1	0
20	Dox1Day8	smooth/plexi	0.913043	0.0869565
20	Dox1Day8	smooth/plexi	0.97561	0.0243902
20	Dox1Day8	smooth/plexi	0.944444	0.0555556
21	Dox1Day8	smooth/plexi	1	0
21	Dox1Day8	smooth/plexi	0.0909091	0.0909091
21	Dox1Day8	smooth/plexi	0.96	0.04
21	Dox1Day8	smooth/plexi	1	0
21	Dox1Day8	smooth/plexi	1	0
21	Dox1Day8	smooth/plexi	0.0714286	0.0714286
21	Dox1Day8	smooth/plexi	0.0357143	0.0357143
21	Dox1Day8	smooth/plexi	0.115385	0.115385
21	Dox1Day8	smooth/plexi	0.0357143	0.0357143
22	Dox1Day8	smooth/plexi	1	0
22	Dox1Day8	smooth/plexi	1	0
22	Dox1Day8	smooth/plexi	1	0
22	Dox1Day8	smooth/plexi	0.09375	0.09375
22	Dox1Day8	smooth/plexi	1	0
22	Dox1Day8	smooth/plexi	0.966667	0.0333333
22	Dox1Day8	smooth/plexi	0.107143	0.107143
22	Dox1Day8	smooth/plexi	0.0344828	0.0344828
22	Dox1Day8	smooth/plexi	0.0344828	0.0344828
22	Dox1Day8	smooth/plexi	1	0
23	Dox1Day8	smooth/plexi	0.08	0.08
23	Dox1Day8	smooth/plexi	1	0
23	Dox1Day8	smooth/plexi	1	0
23	Dox1Day8	smooth/plexi	1	0
23	Dox1Day8	smooth/plexi	0.111111	0.111111
23	Dox1Day8	smooth/plexi	0.933333	0.0666667
23	Dox1Day8	smooth/plexi	0.965517	0.0344828
23	Dox1Day8	smooth/plexi	0.0689655	0.0689655
23	Dox1Day8	smooth/plexi	1	0
24	Dox1Day8	smooth/plexi	0.961538	0.0384615
24	Dox1Day8	smooth/plexi	0.967742	0.0322581
24	Dox1Day8	smooth/plexi	0.0322581	0.0322581
24	Dox1Day8	smooth/plexi	0.933333	0.0666667
24	Dox1Day8	smooth/plexi	0.1	0.1
24	Dox1Day8	smooth/plexi	1	0
24	Dox1Day8	smooth/plexi	0.111111	0.111111
24	Dox1Day8	smooth/plexi	1	0
24	Dox1Day8	smooth/plexi	0.933333	0.0666667
24	Dox1Day8	smooth/plexi	0.933333	0.0666667
24	Dox1Day8	smooth/plexi	0.1	0.1
24	Dox1Day8	smooth/plexi	0.925926	0.0740741
24	Dox1Day8	smooth/plexi	0.964286	0.0357143
17	Dox1Day8	coated/Syl	0.136364	0.136364
17	Dox1Day8	coated/Syl	0.136364	0.136364
17	Dox1Day8	coated/Syl	1	0
17	Dox1Day8	coated/Syl	0.130435	0.130435
17	Dox1Day8	coated/Syl	0.136364	0.136364
17	Dox1Day8	coated/Syl	1	0
17	Dox1Day8	coated/Syl	0.851852	0.148148
17	Dox1Day8	coated/Syl	0.0909091	0.0909091
17	Dox1Day8	coated/Syl	0.047619	0.047619
17	Dox1Day8	coated/Syl	0.181818	0.181818
18	Dox1Day8	coated/Syl	0.2	0.2
18	Dox1Day8	coated/Syl	0.285714	0.285714
18	Dox1Day8	coated/Syl	0.190476	0.190476
18	Dox1Day8	coated/Syl	0.72	0.28
18	Dox1Day8	coated/Syl	0.826087	0.173913
18	Dox1Day8	coated/Syl	0.277778	0.277778
18	Dox1Day8	coated/Syl	0.714286	0.285714
18	Dox1Day8	coated/Syl	1	0
18	Dox1Day8	coated/Syl	0.0384615	0.0384615
19	Dox1Day8	coated/Syl	0.88	0.12
19	Dox1Day8	coated/Syl	0.916667	0.0833333
19	Dox1Day8	coated/Syl	1	0
19	Dox1Day8	coated/Syl	0.84375	0.15625
19	Dox1Day8	coated/Syl	0.09375	0.09375
19	Dox1Day8	coated/Syl	0.0689655	0.0689655
19	Dox1Day8	coated/Syl	0.0625	0.0625
19	Dox1Day8	coated/Syl	0.0357143	0.0357143
19	Dox1Day8	coated/Syl	1	0
20	Dox1Day8	coated/Syl	0.961538	0.0384615
20	Dox1Day8	coated/Syl	0.961538	0.0384615
20	Dox1Day8	coated/Syl	0.666667	0.333333
20	Dox1Day8	coated/Syl	0.65	0.35
20	Dox1Day8	coated/Syl	0.772727	0.227273
20	Dox1Day8	coated/Syl	1	0
20	Dox1Day8	coated/Syl	0.913043	0.0869565
20	Dox1Day8	coated/Syl	0.952381	0.047619
20	Dox1Day8	coated/Syl	0.90625	0.09375
20	Dox1Day8	coated/Syl	0.03125	0.03125
21	Dox1Day8	coated/Syl	0.08	0.08
21	Dox1Day8	coated/Syl	0.0416667	0.0416667
21	Dox1Day8	coated/Syl	1	0
21	Dox1Day8	coated/Syl	0.130435	0.130435
21	Dox1Day8	coated/Syl	0.92	0.08
21	Dox1Day8	coated/Syl	0.925926	0.0740741
21	Dox1Day8	coated/Syl	0.136364	0.136364
21	Dox1Day8	coated/Syl	0.892857	0.107143
21	Dox1Day8	coated/Syl	0.107143	0.107143
21	Dox1Day8	coated/Syl	0.75	0.25
21	Dox1Day8	coated/Syl	0.888889	0.111111
22	Dox1Day8	coated/Syl	1	0
22	Dox1Day8	coated/Syl	0.266667	0.266667
22	Dox1Day8	coated/Syl	0.95	0.05
22	Dox1Day8	coated/Syl	0.875	0.125
22	Dox1Day8	coated/Syl	0.85	0.15
22	Dox1Day8	coated/Syl	0.52381	0.47619
22	Dox1Day8	coated/Syl	0.681818	0.318182
22	Dox1Day8	coated/Syl	0.529412	0.470588
22	Dox1Day8	coated/Syl	0.826087	0.173913
22	Dox1Day8	coated/Syl	0.578947	0.421053
22	Dox1Day8	coated/Syl	0.611111	0.388889
23	Dox1Day8	coated/Syl	0.142857	0.142857
23	Dox1Day8	coated/Syl	0.875	0.125
23	Dox1Day8	coated/Syl	0.727273	0.272727
23	Dox1Day8	coated/Syl	0.947368	0.0526316
23	Dox1Day8	coated/Syl	0.45	0.45
23	Dox1Day8	coated/Syl	0.555556	0.444444
23	Dox1Day8	coated/Syl	0.85	0.15
23	Dox1Day8	coated/Syl	1	0
23	Dox1Day8	coated/Syl	0.904762	0.0952381
23	Dox1Day8	coated/Syl	0.95	0.05
23	Dox1Day8	coated/Syl	0.9	0.1
24	Dox1Day8	coated/Syl	0.952381	0.047619
24	Dox1Day8	coated/Syl	0.952381	0.047619
24	Dox1Day8	coated/Syl	0.954545	0.0454545
24	Dox1Day8	coated/Syl	0.0454545	0.0454545
24	Dox1Day8	coated/Syl	0.909091	0.0909091
24	Dox1Day8	coated/Syl	0.954545	0.0454545
24	Dox1Day8	coated/Syl	1	0
24	Dox1Day8	coated/Syl	0.0454545	0.0454545
24	Dox1Day8	coated/Syl	0.916667	0.0833333
24	Dox1Day8	coated/Syl	0.956522	0.0434783
17	DoxOff	smooth/plexi	0.972222	0.0277778
17	DoxOff	smooth/plexi	0.138889	0.138889
17	DoxOff	smooth/plexi	0.0857143	0.0857143
17	DoxOff	smooth/plexi	0.0789474	0.0789474
17	DoxOff	smooth/plexi	0.030303	0.030303
17	DoxOff	smooth/plexi	1	0
17	DoxOff	smooth/plexi	1	0
17	DoxOff	smooth/plexi	0.0740741	0.0740741
17	DoxOff	smooth/plexi	0.914286	0.0857143
17	DoxOff	smooth/plexi	0.0571429	0.0571429
17	DoxOff	smooth/plexi	0.097561	0.097561
18	DoxOff	smooth/plexi	0.0714286	0.0714286
18	DoxOff	smooth/plexi	0.111111	0.111111
18	DoxOff	smooth/plexi	0.0454545	0.0454545
18	DoxOff	smooth/plexi	0.137931	0.137931
18	DoxOff	smooth/plexi	0.0833333	0.0833333
18	DoxOff	smooth/plexi	0.125	0.125
18	DoxOff	smooth/plexi	0.0384615	0.0384615
18	DoxOff	smooth/plexi	0.04	0.04
18	DoxOff	smooth/plexi	0.153846	0.153846
18	DoxOff	smooth/plexi	0.24	0.24
19	DoxOff	smooth/plexi	0.0384615	0.0384615
19	DoxOff	smooth/plexi	0.0833333	0.0833333
19	DoxOff	smooth/plexi	0.121212	0.121212
19	DoxOff	smooth/plexi	0.0357143	0.0357143
19	DoxOff	smooth/plexi	0.137931	0.137931
19	DoxOff	smooth/plexi	0.178571	0.178571
19	DoxOff	smooth/plexi	0.939394	0.0606061
19	DoxOff	smooth/plexi	0.030303	0.030303
19	DoxOff	smooth/plexi	0.909091	0.0909091
19	DoxOff	smooth/plexi	0.825	0.175
20	DoxOff	smooth/plexi	0.111111	0.111111
20	DoxOff	smooth/plexi	0.0666667	0.0666667
20	DoxOff	smooth/plexi	0.0882353	0.0882353
20	DoxOff	smooth/plexi	0.0555556	0.0555556
20	DoxOff	smooth/plexi	0.925926	0.0740741
20	DoxOff	smooth/plexi	1	0
20	DoxOff	smooth/plexi	0.939394	0.0606061
20	DoxOff	smooth/plexi	0.030303	0.030303
20	DoxOff	smooth/plexi	0.935484	0.0645161
20	DoxOff	smooth/plexi	0.0967742	0.0967742
21	DoxOff	smooth/plexi	0.9375	0.0625
21	DoxOff	smooth/plexi	0.818182	0.181818
21	DoxOff	smooth/plexi	0.933333	0.0666667
21	DoxOff	smooth/plexi	0.0333333	0.0333333
21	DoxOff	smooth/plexi	0.0833333	0.0833333
21	DoxOff	smooth/plexi	1	0
21	DoxOff	smooth/plexi	0.0666667	0.0666667
21	DoxOff	smooth/plexi	0.962963	0.037037
21	DoxOff	smooth/plexi	0.966667	0.0333333
21	DoxOff	smooth/plexi	0.918919	0.0810811
21	DoxOff	smooth/plexi	0.918919	0.0810811
22	DoxOff	smooth/plexi	1	0
22	DoxOff	smooth/plexi	0.931034	0.0689655
22	DoxOff	smooth/plexi	0.942857	0.0571429
22	DoxOff	smooth/plexi	1	0
22	DoxOff	smooth/plexi	0.958333	0.0416667
22	DoxOff	smooth/plexi	1	0
22	DoxOff	smooth/plexi	0.111111	0.111111
22	DoxOff	smooth/plexi	0.0833333	0.0833333
22	DoxOff	smooth/plexi	0.0833333	0.0833333
23	DoxOff	smooth/plexi	0.0434783	0.0434783
23	DoxOff	smooth/plexi	0.208333	0.208333
23	DoxOff	smooth/plexi	1	0
23	DoxOff	smooth/plexi	0.04	0.04
23	DoxOff	smooth/plexi	0.04	0.04
23	DoxOff	smooth/plexi	0.961538	0.0384615
23	DoxOff	smooth/plexi	0.0769231	0.0769231
23	DoxOff	smooth/plexi	1	0
23	DoxOff	smooth/plexi	0.0357143	0.0357143
23	DoxOff	smooth/plexi	0.181818	0.181818
24	DoxOff	smooth/plexi	0.971429	0.0285714
24	DoxOff	smooth/plexi	1	0
24	DoxOff	smooth/plexi	1	0
24	DoxOff	smooth/plexi	0.931034	0.0689655
24	DoxOff	smooth/plexi	0.03125	0.03125
24	DoxOff	smooth/plexi	0.974359	0.025641
24	DoxOff	smooth/plexi	1	0
24	DoxOff	smooth/plexi	0.964286	0.0357143
24	DoxOff	smooth/plexi	0.0714286	0.0714286
24	DoxOff	smooth/plexi	1	0
24	DoxOff	smooth/plexi	0.931034	0.0689655
17	DoxOff	coated/Syl	1	0
17	DoxOff	coated/Syl	0.03125	0.03125
17	DoxOff	coated/Syl	1	0
17	DoxOff	coated/Syl	0.9	0.1
17	DoxOff	coated/Syl	1	0
17	DoxOff	coated/Syl	0.0714286	0.0714286
17	DoxOff	coated/Syl	0.965517	0.0344828
17	DoxOff	coated/Syl	0.0689655	0.0689655
17	DoxOff	coated/Syl	1	0
18	DoxOff	coated/Syl	0.851852	0.148148
18	DoxOff	coated/Syl	0.037037	0.037037
18	DoxOff	coated/Syl	0.26087	0.26087
18	DoxOff	coated/Syl	0.272727	0.272727
18	DoxOff	coated/Syl	0.172414	0.172414
18	DoxOff	coated/Syl	0.0769231	0.0769231
18	DoxOff	coated/Syl	0.12	0.12
18	DoxOff	coated/Syl	0.04	0.04
18	DoxOff	coated/Syl	1	0
19	DoxOff	coated/Syl	0.0333333	0.0333333
19	DoxOff	coated/Syl	0.09375	0.09375
19	DoxOff	coated/Syl	0.928571	0.0714286
19	DoxOff	coated/Syl	0.107143	0.107143
19	DoxOff	coated/Syl	1	0
19	DoxOff	coated/Syl	0.0714286	0.0714286
19	DoxOff	coated/Syl	0.972222	0.0277778
19	DoxOff	coated/Syl	0.966667	0.0333333
19	DoxOff	coated/Syl	1	0
19	DoxOff	coated/Syl	0.96875	0.03125
20	DoxOff	coated/Syl	1	0
20	DoxOff	coated/Syl	1	0
20	DoxOff	coated/Syl	0.928571	0.0714286
20	DoxOff	coated/Syl	0.0625	0.0625
20	DoxOff	coated/Syl	0.923077	0.0769231
20	DoxOff	coated/Syl	0.931034	0.0689655
20	DoxOff	coated/Syl	0.0344828	0.0344828
20	DoxOff	coated/Syl	0.972222	0.0277778
20	DoxOff	coated/Syl	0.961538	0.0384615
20	DoxOff	coated/Syl	1	0
21	DoxOff	coated/Syl	1	0
21	DoxOff	coated/Syl	1	0
21	DoxOff	coated/Syl	0.0384615	0.0384615
21	DoxOff	coated/Syl	0.913043	0.0869565
21	DoxOff	coated/Syl	1	0
21	DoxOff	coated/Syl	0.0769231	0.0769231
21	DoxOff	coated/Syl	0.0434783	0.0434783
21	DoxOff	coated/Syl	0.863636	0.136364
22	DoxOff	coated/Syl	1	0
22	DoxOff	coated/Syl	0.961538	0.0384615
22	DoxOff	coated/Syl	0.961538	0.0384615
22	DoxOff	coated/Syl	0.08	0.08
22	DoxOff	coated/Syl	0.0555556	0.0555556
22	DoxOff	coated/Syl	0.136364	0.136364
22	DoxOff	coated/Syl	0.96	0.04
22	DoxOff	coated/Syl	0.08	0.08
22	DoxOff	coated/Syl	0.909091	0.0909091
23	DoxOff	coated/Syl	1	0
23	DoxOff	coated/Syl	0.0833333	0.0833333
23	DoxOff	coated/Syl	0.173913	0.173913
23	DoxOff	coated/Syl	0.964286	0.0357143
23	DoxOff	coated/Syl	1	0
23	DoxOff	coated/Syl	0.04	0.04
23	DoxOff	coated/Syl	0.217391	0.217391
23	DoxOff	coated/Syl	0.272727	0.272727
23	DoxOff	coated/Syl	0.961538	0.0384615
23	DoxOff	coated/Syl	0.115385	0.115385
24	DoxOff	coated/Syl	0.0333333	0.0333333
24	DoxOff	coated/Syl	0.956522	0.0434783
24	DoxOff	coated/Syl	0.923077	0.0769231
24	DoxOff	coated/Syl	0.961538	0.0384615
24	DoxOff	coated/Syl	1	0
24	DoxOff	coated/Syl	0.0666667	0.0666667
24	DoxOff	coated/Syl	0.870968	0.129032
24	DoxOff	coated/Syl	0.961538	0.0384615
24	DoxOff	coated/Syl	0.903226	0.0967742
24	DoxOff	coated/Syl	1	0
