# Supplementary material for: Long ascending propriospinal neurons provide flexible, context-specific control of interlimb coordination
Source: eLife. 2020 Sep 9;9:e53565. doi: 10.7554/eLife.53565 (PMC7527236; doi:10.7554/eLife.53565)
Supplement: Figure 5—source data 4. [file elife-53565-fig5-data4.xlsx]

## Sheet: L-R_hindlimbs
Animal_ID	Baseline_rawPhase	Baseline_transPhase		Animal_ID	PreDox1_rawPhase	PreDox1_transPhase		Animal_ID	Dox1Day3_rawPhase	Dox1Day3_transPhase		Animal_ID	Dox1Day5_rawPhase	Dox1Day5_transPhase		Animal_ID	Dox1Day8_rawPhase	Dox1Day8_transPhase		Animal_ID	DoxOff_rawPhase	DoxOff_transPhase		Animal_ID	SugarCon_rawPhase	SugarCon_transPhase		Animal_ID	PreDox2_rawPhase	PreDox2_transPhase		Animal_ID	Dox2Day3_rawPhase	Dox2Day3_transPhase		Animal_ID	Dox2Day5_rawPhase	Dox2Day5_transPhase
1	0.527778	0.527778		1	0.5	0.5		1	0.521739	0.521739		1	0.52	0.52		1	0.5	0.5		1	0.535714	0.535714		12	0.481481	0.518519		1	0.516129	0.516129		1	0.538462	0.538462		1	0.5	0.5
1	0.472222	0.527778		1	0.5	0.5		1	0.458333	0.541667		1	0.541667	0.541667		1	0.44	0.56		1	0.535714	0.535714		12	0.48	0.52		1	0.533333	0.533333		1	0.55814	0.55814		1	0.515152	0.515152
1	0.472222	0.527778		1	0.533333	0.533333		1	0.458333	0.541667		1	0.521739	0.521739		1	0.5	0.5		1	0.516129	0.516129		12	0.48	0.52		1	0.517241	0.517241		1	0.5	0.5		1	0.53125	0.53125
1	0.473684	0.526316		1	0.4375	0.5625		1	0.458333	0.541667		1	0.48	0.52		1	0.48	0.52		1	0.5	0.5		12	0.461538	0.538462		1	0.5	0.5		1	0.525	0.525		1	0.515152	0.515152
1	0.475	0.525		1	0.470588	0.529412		1	0.44	0.56		1	0.478261	0.521739		1	0.5	0.5		1	0.482759	0.517241		12	0.481481	0.518519		1	0.53125	0.53125		1	0.512821	0.512821		1	0.5	0.5
1	0.5	0.5		1	0.5	0.5		1	0.5	0.5		1	0.518519	0.518519		1	0.5	0.5		1	0.5	0.5		12	0.5	0.5		1	0.5625	0.5625		1	0.526316	0.526316		1	0.53125	0.53125
1	0.5	0.5		1	0.5	0.5		1	0.478261	0.521739		1	0.5	0.5		1	0.481481	0.518519		1	0.517241	0.517241		12	0.464286	0.535714		1	0.533333	0.533333		1	0.552632	0.552632		1	0.5	0.5
1	0.5	0.5		1	0.5	0.5		1	0.434783	0.565217		1	0.5	0.5		1	0.423077	0.576923		1	0.5	0.5		12	0.444444	0.555556		1	0.5	0.5		1	0.540541	0.540541		1	0.529412	0.529412
1	0.52381	0.52381		1	0.5	0.5		1	0.48	0.52		1	0.538462	0.538462		1	0.5	0.5		1	0.482759	0.517241		12	0.464286	0.535714		1	0.5	0.5		1	0.513514	0.513514		1	0.515152	0.515152
1	0.5	0.5		1	0.5	0.5		1	0.44	0.56		1	0.52	0.52		1	0.5	0.5		2	0.551724	0.551724		12	0.481481	0.518519		1	0.548387	0.548387		1	0.540541	0.540541		1	0.515152	0.515152
2	0.545455	0.545455		1	0.5	0.5		2	0.5	0.5		2	0.518519	0.518519		2	0.464286	0.535714		2	0.566667	0.566667		12	0.482759	0.517241		2	0.551724	0.551724		2	0.535714	0.535714		2	0.541667	0.541667
2	0.521739	0.521739		2	0.571429	0.571429		2	0.48	0.52		2	0.518519	0.518519		2	0.444444	0.555556		2	0.580645	0.580645		12	0.481481	0.518519		2	0.551724	0.551724		2	0.518519	0.518519		2	0.541667	0.541667
2	0.478261	0.521739		2	0.571429	0.571429		2	0.52	0.52		2	0.5	0.5		2	0.448276	0.551724		2	0.6	0.6		12	0.482759	0.517241		2	0.538462	0.538462		2	0.518519	0.518519		2	0.521739	0.521739
2	0.5	0.5		2	0.533333	0.533333		2	0.518519	0.518519		2	0.52	0.52		2	0.444444	0.555556		2	0.535714	0.535714		12	0.481481	0.518519		2	0.518519	0.518519		2	0.5	0.5		2	0.5	0.5
2	0.5	0.5		2	0.533333	0.533333		2	0.461538	0.538462		2	0.52	0.52		2	0.48	0.52		2	0.535714	0.535714		12	0.5	0.5		2	0.518519	0.518519		2	0.555556	0.555556		2	0.5	0.5
2	0.5	0.5		2	0.533333	0.533333		2	0.44	0.56		2	0.521739	0.521739		2	0.464286	0.535714		2	0.555556	0.555556		12	0.481481	0.518519		2	0.464286	0.535714		2	0.518519	0.518519		2	0.52	0.52
2	0.48	0.52		2	0.529412	0.529412		2	0.416667	0.583333		2	0.52	0.52		2	0.464286	0.535714		2	0.551724	0.551724		12	0.481481	0.518519		2	0.517241	0.517241		2	0.5	0.5		2	0.52	0.52
2	0.5	0.5		2	0.529412	0.529412		2	0.423077	0.576923		2	0.52	0.52		2	0.444444	0.555556		2	0.518519	0.518519		12	0.464286	0.535714		2	0.482759	0.517241		2	0.571429	0.571429		2	0.538462	0.538462
2	0.44	0.56		2	0.533333	0.533333		2	0.444444	0.555556		2	0.52	0.52		2	0.44	0.56		2	0.56	0.56		13	0.541667	0.541667		2	0.481481	0.518519		2	0.551724	0.551724		2	0.5	0.5
2	0.48	0.52		2	0.470588	0.529412		2	0.423077	0.576923		2	0.52	0.52		2	0.52381	0.52381		7	0.451613	0.548387		13	0.541667	0.541667		2	0.5	0.5		2	0.518519	0.518519		2	0.48	0.52
7	0.48	0.52		2	0.470588	0.529412		7	0.517241	0.517241		7	0.461538	0.538462		7	0.478261	0.521739		7	0.4375	0.5625		13	0.541667	0.541667		7	0.482759	0.517241		7	0.483871	0.516129		7	0.40625	0.59375
7	0.44	0.56		7	0.466667	0.533333		7	0.5	0.5		7	0.481481	0.518519		7	0.5	0.5		7	0.441176	0.558824		13	0.541667	0.541667		7	0.466667	0.533333		7	0.516129	0.516129		7	0.419355	0.580645
7	0.464286	0.535714		7	0.5	0.5		7	0.5	0.5		7	0.5	0.5		7	0.48	0.52		7	0.441176	0.558824		13	0.538462	0.538462		7	0.466667	0.533333		7	0.5	0.5		7	0.466667	0.533333
7	0.464286	0.535714		7	0.466667	0.533333		7	0.482759	0.517241		7	0.44	0.56		7	0.458333	0.541667		7	0.470588	0.529412		13	0.56	0.56		7	0.5	0.5		7	0.533333	0.533333		7	0.466667	0.533333
7	0.464286	0.535714		7	0.470588	0.529412		7	0.428571	0.571429		7	0.461538	0.538462		7	0.478261	0.521739		7	0.535714	0.535714		13	0.565217	0.565217		7	0.5	0.5		7	0.517241	0.517241		7	0.482759	0.517241
7	0.538462	0.538462		7	0.5	0.5		7	0.517241	0.517241		7	0.52	0.52		7	0.478261	0.521739		7	0.482759	0.517241		13	0.545455	0.545455		7	0.517241	0.517241		7	0.545455	0.545455		7	0.464286	0.535714
7	0.538462	0.538462		7	0.470588	0.529412		7	0.5	0.5		7	0.5	0.5		7	0.434783	0.565217		7	0.482759	0.517241		13	0.565217	0.565217		7	0.5	0.5		7	0.548387	0.548387		7	0.516129	0.516129
7	0.48	0.52		7	0.470588	0.529412		7	0.517241	0.517241		7	0.5	0.5		7	0.478261	0.521739		7	0.5	0.5		13	0.565217	0.565217		7	0.5	0.5		7	0.5	0.5		7	0.464286	0.535714
7	0.481481	0.518519		7	0.470588	0.529412		7	0.517241	0.517241		7	0.5	0.5		7	0.5	0.5		7	0.482759	0.517241		13	0.56	0.56		7	0.5	0.5		7	0.548387	0.548387		7	0.466667	0.533333
7	0.464286	0.535714		7	0.526316	0.526316		7	0.517241	0.517241		7	0.461538	0.538462		7	0.481481	0.518519		8	0.5	0.5		13	0.535714	0.535714		7	0.5	0.5		7	0.516129	0.516129		7	0.5	0.5
8	0.458333	0.541667		8	0.578947	0.578947		8	0.434783	0.565217		8	0.518519	0.518519		8	0.461538	0.538462		8	0.5	0.5		13	0.541667	0.541667		8	0.52	0.52		8	0.586207	0.586207		8	0.518519	0.518519
8	0.458333	0.541667		8	0.55	0.55		8	0.521739	0.521739		8	0.5	0.5		8	0.464286	0.535714		8	0.5	0.5		13	0.521739	0.521739		8	0.52	0.52		8	0.517241	0.517241		8	0.535714	0.535714
8	0.5	0.5		8	0.52381	0.52381		8	0.5	0.5		8	0.461538	0.538462		8	0.444444	0.555556		8	0.5	0.5		13	0.52	0.52		8	0.52	0.52		8	0.551724	0.551724		8	0.592593	0.592593
8	0.52	0.52		8	0.545455	0.545455		8	0.458333	0.541667		8	0.517241	0.517241		8	0.464286	0.535714		8	0.461538	0.538462		13	0.56	0.56		8	0.5	0.5		8	0.566667	0.566667		8	0.5	0.5
8	0.461538	0.538462		8	0.52381	0.52381		8	0.416667	0.583333		8	0.518519	0.518519		8	0.5	0.5		8	0.52	0.52		13	0.56	0.56		8	0.52	0.52		8	0.518519	0.518519		8	0.518519	0.518519
8	0.48	0.52		8	0.55	0.55		8	0.48	0.52		8	0.535714	0.535714		8	0.44	0.56		8	0.52	0.52		14	0.5	0.5		8	0.52	0.52		8	0.538462	0.538462		8	0.481481	0.518519
8	0.448276	0.551724		8	0.55	0.55		8	0.518519	0.518519		8	0.518519	0.518519		8	0.48	0.52		8	0.52	0.52		14	0.52	0.52		8	0.541667	0.541667		8	0.5	0.5		8	0.518519	0.518519
8	0.56	0.56		8	0.55	0.55		8	0.481481	0.518519		8	0.538462	0.538462		8	0.444444	0.555556		8	0.535714	0.535714		14	0.538462	0.538462		8	0.541667	0.541667		8	0.5	0.5		8	0.5	0.5
8	0.52	0.52		8	0.571429	0.571429		8	0.481481	0.518519		8	0.5	0.5		8	0.444444	0.555556		8	0.5	0.5		14	0.518519	0.518519		8	0.576923	0.576923		8	0.517241	0.517241		8	0.555556	0.555556
8	0.481481	0.518519		8	0.6	0.6		8	0.423077	0.576923		8	0.538462	0.538462		8	0.481481	0.518519		9	0.482759	0.517241		14	0.576923	0.576923		8	0.576923	0.576923		8	0.533333	0.533333		9	0.473684	0.526316
9	0.56	0.56		9	0.555556	0.555556		9	0.5	0.5		9	0.5	0.5		9	0.5	0.5		9	0.464286	0.535714		14	0.538462	0.538462		9	0.5	0.5		9	0.59375	0.59375		9	0.566667	0.566667
9	0.518519	0.518519		9	0.529412	0.529412		9	0.458333	0.541667		9	0.540541	0.540541		9	0.46875	0.53125		9	0.482759	0.517241		14	0.5	0.5		9	0.548387	0.548387		9	0.5	0.5		9	0.533333	0.533333
9	0.52	0.52		9	0.555556	0.555556		9	0.48	0.52		9	0.486486	0.513514		9	0.484848	0.515152		9	0.484848	0.515152		14	0.576923	0.576923		9	0.59375	0.59375		9	0.428571	0.571429		9	0.5	0.5
9	0.5	0.5		9	0.529412	0.529412		9	0.461538	0.538462		9	0.527778	0.527778		9	0.454545	0.545455		9	0.46875	0.53125		14	0.555556	0.555556		9	0.5	0.5		9	0.515152	0.515152		9	0.515152	0.515152
9	0.518519	0.518519		9	0.526316	0.526316		9	0.458333	0.541667		9	0.513514	0.513514		9	0.454545	0.545455		9	0.5	0.5		14	0.555556	0.555556		9	0.535714	0.535714		9	0.5	0.5		9	0.516129	0.516129
9	0.5	0.5		9	0.526316	0.526316		9	0.5	0.5		9	0.527778	0.527778		9	0.4375	0.5625		9	0.482759	0.517241		14	0.538462	0.538462		9	0.533333	0.533333		9	0.515152	0.515152		9	0.517241	0.517241
9	0.538462	0.538462		9	0.526316	0.526316		9	0.481481	0.518519		9	0.513514	0.513514		9	0.451613	0.548387		9	0.482759	0.517241		14	0.518519	0.518519		9	0.5	0.5		9	0.53125	0.53125		9	0.516129	0.516129
9	0.538462	0.538462		9	0.5	0.5		9	0.481481	0.518519		9	0.512821	0.512821		9	0.46875	0.53125		9	0.481481	0.518519		14	0.521739	0.521739		9	0.466667	0.533333		9	0.542857	0.542857		9	0.5	0.5
9	0.52	0.52		9	0.5	0.5		9	0.481481	0.518519		9	0.512821	0.512821		9	0.454545	0.545455		9	0.466667	0.533333		14	0.478261	0.521739		9	0.555556	0.555556		9	0.548387	0.548387		9	0.5	0.5
9	0.5	0.5		9	0.526316	0.526316		9	0.48	0.52		9	0.473684	0.526316		9	0.441176	0.558824		10	0.52	0.52		14	0.5	0.5		9	0.466667	0.533333		10	0.518519	0.518519		9	0.483871	0.516129
10	0.5	0.5		10	0.473684	0.526316		10	0.5	0.5		10	0.5	0.5		10	0.5	0.5		10	0.5	0.5		14	0.52	0.52		10	0.481481	0.518519		10	0.5	0.5		10	0.461538	0.538462
10	0.518519	0.518519		10	0.526316	0.526316		10	0.541667	0.541667		10	0.518519	0.518519		10	0.5	0.5		10	0.461538	0.538462		14	0.541667	0.541667		10	0.518519	0.518519		10	0.5	0.5		10	0.48	0.52
10	0.538462	0.538462		10	0.421053	0.578947		10	0.5	0.5		10	0.535714	0.535714		10	0.518519	0.518519		10	0.461538	0.538462		15	0.541667	0.541667		10	0.5	0.5		10	0.518519	0.518519		10	0.5	0.5
10	0.535714	0.535714		10	0.45	0.55		10	0.5	0.5		10	0.481481	0.518519		10	0.518519	0.518519		10	0.481481	0.518519		15	0.521739	0.521739		10	0.518519	0.518519		10	0.481481	0.518519		10	0.5	0.5
10	0.535714	0.535714		10	0.47619	0.52381		10	0.52	0.52		10	0.5	0.5		10	0.481481	0.518519		10	0.518519	0.518519		15	0.521739	0.521739		10	0.5	0.5		10	0.5	0.5		10	0.518519	0.518519
10	0.482759	0.517241		10	0.55	0.55		10	0.48	0.52		10	0.5	0.5		10	0.48	0.52		10	0.5	0.5		15	0.565217	0.565217		10	0.464286	0.535714		10	0.5	0.5		10	0.518519	0.518519
10	0.535714	0.535714		10	0.578947	0.578947		10	0.464286	0.535714		10	0.517241	0.517241		10	0.5	0.5		10	0.518519	0.518519		15	0.583333	0.583333		10	0.5	0.5		10	0.518519	0.518519		10	0.5	0.5
10	0.482759	0.517241		10	0.5	0.5		10	0.481481	0.518519		10	0.535714	0.535714		10	0.52	0.52		10	0.518519	0.518519		15	0.541667	0.541667		10	0.482759	0.517241		10	0.481481	0.518519		10	0.5	0.5
10	0.516129	0.516129		10	0.5	0.5		10	0.481481	0.518519		10	0.517241	0.517241		10	0.5	0.5		10	0.5	0.5		15	0.545455	0.545455		10	0.5	0.5		10	0.535714	0.535714		10	0.518519	0.518519
10	0.517241	0.517241		12	0.481481	0.518519		10	0.482759	0.517241		10	0.548387	0.548387		10	0.48	0.52		12	0.52	0.52		15	0.521739	0.521739		10	0.517241	0.517241		12	0.48	0.52		10	0.5	0.5
12	0.4375	0.5625		12	0.461538	0.538462		12	0.52	0.52		12	0.48	0.52		12	0.5	0.5		12	0.5	0.5		15	0.565217	0.565217		12	0.48	0.52		12	0.461538	0.538462		12	0.5	0.5
12	0.5	0.5		12	0.481481	0.518519		12	0.538462	0.538462		12	0.5	0.5		12	0.538462	0.538462		12	0.48	0.52		15	0.565217	0.565217		12	0.461538	0.538462		12	0.4375	0.5625		12	0.521739	0.521739
12	0.533333	0.533333		12	0.482759	0.517241		12	0.5	0.5		12	0.48	0.52		12	0.555556	0.555556		12	0.5	0.5		15	0.565217	0.565217		12	0.44	0.56		12	0.444444	0.555556		12	0.458333	0.541667
12	0.466667	0.533333		12	0.482759	0.517241		12	0.5	0.5		12	0.5	0.5		12	0.518519	0.518519		12	0.481481	0.518519		15	0.590909	0.590909		12	0.461538	0.538462		12	0.5	0.5		12	0.461538	0.538462
12	0.4375	0.5625		12	0.5	0.5		12	0.5	0.5		12	0.5	0.5		12	0.535714	0.535714		12	0.5	0.5		15	0.521739	0.521739		12	0.481481	0.518519		12	0.48	0.52		12	0.5	0.5
12	0.466667	0.533333		12	0.481481	0.518519		12	0.5	0.5		12	0.5	0.5		12	0.448276	0.551724		12	0.48	0.52		15	0.521739	0.521739		12	0.481481	0.518519		12	0.481481	0.518519		12	0.48	0.52
12	0.470588	0.529412		12	0.444444	0.555556		12	0.5	0.5		12	0.5	0.5		12	0.464286	0.535714		12	0.5	0.5		15	0.541667	0.541667		12	0.481481	0.518519		12	0.48	0.52		12	0.48	0.52
12	0.470588	0.529412		12	0.464286	0.535714		12	0.538462	0.538462		12	0.461538	0.538462		12	0.464286	0.535714		12	0.481481	0.518519		15	0.541667	0.541667		12	0.481481	0.518519		12	0.44	0.56		12	0.52	0.52
12	0.529412	0.529412		12	0.466667	0.533333		12	0.538462	0.538462		12	0.518519	0.518519		12	0.451613	0.548387		12	0.461538	0.538462		15	0.565217	0.565217		12	0.481481	0.518519		12	0.461538	0.538462		12	0.48	0.52
12	0.5	0.5		13	0.478261	0.521739		12	0.555556	0.555556		12	0.518519	0.518519		12	0.424242	0.575758		12	0.464286	0.535714		15	0.583333	0.583333		12	0.5	0.5		13	0.541667	0.541667		12	0.52	0.52
13	0.5	0.5		13	0.545455	0.545455		13	0.48	0.52		13	0.5	0.5		13	0.454545	0.545455		13	0.47619	0.52381		16	0.458333	0.541667		13	0.52381	0.52381		13	0.541667	0.541667		12	0.5	0.5
13	0.461538	0.538462		13	0.478261	0.521739		13	0.48	0.52		13	0.5	0.5		13	0.454545	0.545455		13	0.590909	0.590909		16	0.416667	0.583333		13	0.5	0.5		13	0.541667	0.541667		13	0.541667	0.541667
13	0.5	0.5		13	0.434783	0.565217		13	0.458333	0.541667		13	0.545455	0.545455		13	0.428571	0.571429		13	0.571429	0.571429		16	0.461538	0.538462		13	0.541667	0.541667		13	0.541667	0.541667		13	0.521739	0.521739
13	0.5	0.5		13	0.434783	0.565217		13	0.44	0.56		13	0.541667	0.541667		13	0.428571	0.571429		13	0.545455	0.545455		16	0.48	0.52		13	0.541667	0.541667		13	0.565217	0.565217		13	0.541667	0.541667
13	0.5	0.5		13	0.5	0.5		13	0.5	0.5		13	0.538462	0.538462		13	0.454545	0.545455		13	0.541667	0.541667		16	0.464286	0.535714		13	0.541667	0.541667		13	0.565217	0.565217		13	0.52381	0.52381
13	0.461538	0.538462		13	0.571429	0.571429		13	0.481481	0.518519		13	0.545455	0.545455		13	0.454545	0.545455		13	0.545455	0.545455		16	0.518519	0.518519		13	0.521739	0.521739		13	0.541667	0.541667		13	0.5	0.5
13	0.461538	0.538462		13	0.521739	0.521739		13	0.461538	0.538462		13	0.545455	0.545455		13	0.47619	0.52381		13	0.565217	0.565217		16	0.5	0.5		13	0.52	0.52		13	0.56	0.56		13	0.521739	0.521739
13	0.461538	0.538462		13	0.52	0.52		13	0.458333	0.541667		13	0.545455	0.545455		13	0.47619	0.52381		13	0.565217	0.565217		16	0.444444	0.555556		13	0.5	0.5		13	0.576923	0.576923		13	0.521739	0.521739
13	0.461538	0.538462		13	0.541667	0.541667		13	0.5	0.5		13	0.52	0.52		13	0.454545	0.545455		13	0.590909	0.590909		16	0.464286	0.535714		13	0.478261	0.521739		13	0.56	0.56		13	0.545455	0.545455
13	0.461538	0.538462		13	0.52	0.52		13	0.461538	0.538462		13	0.541667	0.541667		13	0.434783	0.565217		13	0.545455	0.545455		16	0.48	0.52		13	0.541667	0.541667		14	0.44	0.56		13	0.545455	0.545455
14	0.529412	0.529412		14	0.538462	0.538462		14	0.5	0.5		14	0.52	0.52		14	0.478261	0.521739		14	0.5	0.5		16	0.444444	0.555556		14	0.538462	0.538462		14	0.48	0.52		13	0.545455	0.545455
14	0.470588	0.529412		14	0.517241	0.517241		14	0.5	0.5		14	0.48	0.52		14	0.5	0.5		14	0.521739	0.521739		16	0.444444	0.555556		14	0.5	0.5		14	0.541667	0.541667		14	0.545455	0.545455
14	0.444444	0.555556		14	0.535714	0.535714		14	0.52	0.52		14	0.48	0.52		14	0.458333	0.541667		14	0.521739	0.521739		16	0.48	0.52		14	0.518519	0.518519		14	0.48	0.52		14	0.52381	0.52381
14	0.470588	0.529412		14	0.518519	0.518519		14	0.5	0.5		14	0.52	0.52		14	0.434783	0.565217		14	0.521739	0.521739		16	0.461538	0.538462		14	0.538462	0.538462		14	0.52	0.52		14	0.48	0.52
14	0.5	0.5		14	0.518519	0.518519		14	0.5	0.5		14	0.48	0.52		14	0.48	0.52		14	0.521739	0.521739		16	0.461538	0.538462		14	0.48	0.52		14	0.5	0.5		14	0.454545	0.545455
14	0.526316	0.526316		14	0.538462	0.538462		14	0.478261	0.521739		14	0.5	0.5		14	0.48	0.52		14	0.5	0.5		16	0.444444	0.555556		14	0.5	0.5		14	0.538462	0.538462		14	0.52381	0.52381
14	0.5	0.5		14	0.56	0.56		14	0.5	0.5		14	0.52	0.52		14	0.461538	0.538462		14	0.521739	0.521739		16	0.481481	0.518519		14	0.5	0.5		14	0.583333	0.583333		14	0.5	0.5
14	0.444444	0.555556		14	0.538462	0.538462		14	0.434783	0.565217		14	0.5	0.5		14	0.48	0.52		14	0.5	0.5		16	0.461538	0.538462		14	0.5	0.5		14	0.52	0.52		14	0.5	0.5
14	0.411765	0.588235		14	0.5	0.5		14	0.5	0.5		14	0.5	0.5		14	0.44	0.56		14	0.521739	0.521739		17	0.517241	0.517241		14	0.481481	0.518519		14	0.52	0.52		14	0.48	0.52
14	0.473684	0.526316		14	0.481481	0.518519		14	0.461538	0.538462		14	0.5	0.5		14	0.461538	0.538462		14	0.521739	0.521739		17	0.533333	0.533333		14	0.518519	0.518519		14	0.538462	0.538462		14	0.538462	0.538462
15	0.461538	0.538462		15	0.571429	0.571429		15	0.458333	0.541667		15	0.56	0.56		15	0.48	0.52		15	0.5	0.5		17	0.516129	0.516129		14	0.538462	0.538462		15	0.521739	0.521739		14	0.52	0.52
15	0.5	0.5		15	0.521739	0.521739		15	0.44	0.56		15	0.56	0.56		15	0.458333	0.541667		15	0.521739	0.521739		17	0.59375	0.59375		15	0.56	0.56		15	0.541667	0.541667		14	0.5	0.5
15	0.5	0.5		15	0.565217	0.565217		15	0.48	0.52		15	0.56	0.56		15	0.4	0.6		15	0.545455	0.545455		17	0.566667	0.566667		15	0.52	0.52		15	0.565217	0.565217		15	0.478261	0.521739
15	0.5	0.5		15	0.541667	0.541667		15	0.5	0.5		15	0.56	0.56		15	0.4	0.6		15	0.565217	0.565217		17	0.52	0.52		15	0.48	0.52		15	0.541667	0.541667		15	0.44	0.56
15	0.583333	0.583333		15	0.583333	0.583333		15	0.48	0.52		15	0.538462	0.538462		15	0.423077	0.576923		15	0.583333	0.583333		17	0.5	0.5		15	0.5	0.5		15	0.565217	0.565217		15	0.521739	0.521739
15	0.461538	0.538462		15	0.545455	0.545455		15	0.434783	0.565217		15	0.56	0.56		15	0.416667	0.583333		15	0.565217	0.565217		17	0.516129	0.516129		15	0.541667	0.541667		15	0.565217	0.565217		15	0.541667	0.541667
15	0.461538	0.538462		15	0.5	0.5		15	0.434783	0.565217		15	0.576923	0.576923		15	0.416667	0.583333		15	0.608696	0.608696		17	0.5	0.5		15	0.541667	0.541667		15	0.565217	0.565217		15	0.521739	0.521739
15	0.538462	0.538462		15	0.5	0.5		15	0.44	0.56		15	0.565217	0.565217		15	0.416667	0.583333		15	0.565217	0.565217		17	0.46875	0.53125		15	0.538462	0.538462		15	0.541667	0.541667		15	0.545455	0.545455
15	0.538462	0.538462		15	0.565217	0.565217		15	0.48	0.52		15	0.541667	0.541667		15	0.44	0.56		15	0.545455	0.545455		17	0.571429	0.571429		15	0.5	0.5		15	0.56	0.56		15	0.565217	0.565217
15	0.538462	0.538462		15	0.541667	0.541667		15	0.44	0.56		15	0.538462	0.538462		15	0.423077	0.576923		15	0.541667	0.541667		17	0.482759	0.517241		15	0.52	0.52		15	0.541667	0.541667		15	0.541667	0.541667
16	0.5	0.5		15	0.521739	0.521739		16	0.538462	0.538462		16	0.44	0.56		16	0.521739	0.521739		16	0.428571	0.571429		17	0.5	0.5		15	0.541667	0.541667		16	0.5	0.5		15	0.52381	0.52381
16	0.555556	0.555556		16	0.444444	0.555556		16	0.52	0.52		16	0.44	0.56		16	0.538462	0.538462		16	0.444444	0.555556		17	0.517241	0.517241		16	0.5	0.5		16	0.461538	0.538462		15	0.521739	0.521739
16	0.555556	0.555556		16	0.444444	0.555556		16	0.518519	0.518519		16	0.481481	0.518519		16	0.541667	0.541667		16	0.461538	0.538462		17	0.517241	0.517241		16	0.444444	0.555556		16	0.5	0.5		16	0.464286	0.535714
16	0.555556	0.555556		16	0.461538	0.538462		16	0.538462	0.538462		16	0.5	0.5		16	0.538462	0.538462		16	0.461538	0.538462		17	0.516129	0.516129		16	0.444444	0.555556		16	0.461538	0.538462		16	0.434783	0.565217
16	0.555556	0.555556		16	0.481481	0.518519		16	0.518519	0.518519		16	0.48	0.52		16	0.56	0.56		16	0.423077	0.576923		18	0.5	0.5		16	0.481481	0.518519		16	0.466667	0.533333		16	0.407407	0.592593
16	0.588235	0.588235		16	0.481481	0.518519		16	0.538462	0.538462		16	0.444444	0.555556		16	0.56	0.56		16	0.48	0.52		18	0.482759	0.517241		16	0.458333	0.541667		16	0.5	0.5		16	0.48	0.52
16	0.578947	0.578947		16	0.461538	0.538462		16	0.538462	0.538462		16	0.48	0.52		16	0.538462	0.538462		16	0.48	0.52		18	0.482759	0.517241		16	0.461538	0.538462		16	0.5	0.5		16	0.5	0.5
16	0.611111	0.611111		16	0.48	0.52		16	0.538462	0.538462		16	0.461538	0.538462		16	0.538462	0.538462		16	0.461538	0.538462		18	0.481481	0.518519		16	0.433333	0.566667		16	0.5	0.5		16	0.533333	0.533333
16	0.555556	0.555556		16	0.48	0.52		16	0.535714	0.535714		16	0.444444	0.555556		16	0.52	0.52		16	0.448276	0.551724		18	0.481481	0.518519		16	0.444444	0.555556		16	0.482759	0.517241		16	0.44	0.56
16	0.578947	0.578947		16	0.458333	0.541667		16	0.481481	0.518519		16	0.428571	0.571429		17	0.448276	0.551724		16	0.481481	0.518519		18	0.5	0.5		16	0.448276	0.551724		16	0.48	0.52		16	0.407407	0.592593
17	0.5625	0.5625		16	0.423077	0.576923		17	0.451613	0.548387		17	0.5	0.5		17	0.433333	0.566667		16	0.516129	0.516129		18	0.5	0.5		17	0.551724	0.551724		17	0.481481	0.518519		16	0.423077	0.576923
17	0.533333	0.533333		16	0.444444	0.555556		17	0.46875	0.53125		17	0.533333	0.533333		17	0.448276	0.551724		17	0.517241	0.517241		18	0.482759	0.517241		17	0.566667	0.566667		17	0.5	0.5		17	0.481481	0.518519
17	0.5625	0.5625		17	0.5	0.5		17	0.454545	0.545455		17	0.5	0.5		17	0.483871	0.516129		17	0.516129	0.516129		18	0.448276	0.551724		17	0.548387	0.548387		17	0.461538	0.538462		17	0.464286	0.535714
17	0.533333	0.533333		17	0.481481	0.518519		17	0.484848	0.515152		17	0.464286	0.535714		17	0.464286	0.535714		17	0.5	0.5		18	0.482759	0.517241		17	0.533333	0.533333		17	0.551724	0.551724		17	0.548387	0.548387
17	0.529412	0.529412		17	0.461538	0.538462		17	0.4375	0.5625		17	0.482759	0.517241		17	0.464286	0.535714		17	0.451613	0.548387		18	0.5	0.5		17	0.5	0.5		17	0.533333	0.533333		17	0.48	0.52
17	0.529412	0.529412		17	0.444444	0.555556		17	0.4375	0.5625		17	0.533333	0.533333		17	0.483871	0.516129		17	0.46875	0.53125		18	0.518519	0.518519		17	0.548387	0.548387		17	0.551724	0.551724		17	0.48	0.52
17	0.411765	0.588235		17	0.6	0.6		17	0.433333	0.566667		17	0.548387	0.548387		17	0.419355	0.580645		17	0.533333	0.533333		18	0.481481	0.518519		17	0.5	0.5		17	0.548387	0.548387		17	0.5	0.5
17	0.4375	0.5625		17	0.535714	0.535714		17	0.411765	0.588235		17	0.516129	0.516129		17	0.411765	0.588235		17	0.53125	0.53125		18	0.482759	0.517241		17	0.516129	0.516129		17	0.551724	0.551724		17	0.517241	0.517241
17	0.444444	0.555556		17	0.551724	0.551724		17	0.4	0.6		17	0.533333	0.533333		17	0.4375	0.5625		17	0.516129	0.516129		18	0.5	0.5		17	0.5	0.5		17	0.516129	0.516129		17	0.433333	0.566667
17	0.411765	0.588235		17	0.535714	0.535714		17	0.416667	0.583333		17	0.5	0.5		18	0.5	0.5		17	0.483871	0.516129		18	0.481481	0.518519		17	0.545455	0.545455		17	0.5	0.5		17	0.535714	0.535714
18	0.529412	0.529412		18	0.538462	0.538462		18	0.433333	0.566667		18	0.464286	0.535714		18	0.5	0.5		17	0.516129	0.516129						18	0.454545	0.545455		18	0.586207	0.586207		18	0.52	0.52
18	0.529412	0.529412		18	0.535714	0.535714		18	0.4375	0.5625		18	0.481481	0.518519		18	0.481481	0.518519		18	0.555556	0.555556						18	0.5	0.5		18	0.535714	0.535714		18	0.52	0.52
18	0.5625	0.5625		18	0.555556	0.555556		18	0.419355	0.580645		18	0.5	0.5		18	0.481481	0.518519		18	0.538462	0.538462						18	0.483871	0.516129		18	0.517241	0.517241		18	0.538462	0.538462
18	0.4375	0.5625		18	0.571429	0.571429		18	0.4375	0.5625		18	0.5	0.5		18	0.5	0.5		18	0.518519	0.518519						18	0.558824	0.558824		18	0.533333	0.533333		18	0.535714	0.535714
18	0.529412	0.529412		18	0.571429	0.571429		18	0.454545	0.545455		18	0.481481	0.518519		18	0.444444	0.555556		18	0.517241	0.517241						18	0.482759	0.517241		18	0.566667	0.566667		18	0.5	0.5
18	0.470588	0.529412		18	0.538462	0.538462		18	0.5	0.5		18	0.5	0.5		18	0.444444	0.555556		18	0.518519	0.518519						18	0.5	0.5		18	0.535714	0.535714		18	0.518519	0.518519
18	0.5	0.5		18	0.518519	0.518519		18	0.5	0.5		18	0.535714	0.535714		18	0.5	0.5		18	0.5	0.5						18	0.466667	0.533333		18	0.5	0.5		18	0.5	0.5
18	0.4375	0.5625		18	0.571429	0.571429		18	0.464286	0.535714		18	0.5	0.5		18	0.481481	0.518519		18	0.538462	0.538462						18	0.5	0.5		18	0.538462	0.538462		18	0.518519	0.518519
18	0.444444	0.555556		18	0.576923	0.576923		18	0.517241	0.517241		18	0.5	0.5		18	0.481481	0.518519		18	0.518519	0.518519						18	0.5	0.5		18	0.5	0.5		18	0.535714	0.535714
18	0.529412	0.529412		18	0.538462	0.538462		18	0.5	0.5		18	0.517241	0.517241		18	0.482759	0.517241		18	0.518519	0.518519						18	0.548387	0.548387		18	0.5	0.5		18	0.535714	0.535714
